# Supplementary material for: FMRP has a cell-type-specific role in CA1 pyramidal neurons to regulate autism-related transcripts and circadian memory
Source: eLife. 2019 Dec 20;8:e46919. doi: 10.7554/eLife.46919 (PMC6924960; doi:10.7554/eLife.46919)
Supplement: Supplementary file 1. — Summary of read alignment for each replicate of FMRP cTag CA1 CLIP including Fmr1-cTagCamk2a-Cre and Fmr1-cTag negative control CLIP. The total number of reads obtained after demultiplexing and initial collapse of exact PCR duplicates is given (‘input reads for alignment’) as well as the number of these reads which uniquely mapped to the genome (‘Uniquely mapped to genome’) and transcriptome (‘Mapped within transcriptome and collapsed for PCR duplicates’). Finally, the number of reads which mapped to the positive strand of the CA1 transcriptome (as defined by CA1 TRAP rpkm > 1) is shown (‘Mapped within CA1 TRAP defined transcriptome for CLIP score determination’). [file elife-46919-supp1.xlsx]

## Sheet: Sheet1
	Replicate 1	Replicate 1	Replicate 2	Replicate 2	Replicate 3	Replicate 3
	Camk2a-Cre	Cre Negative	Camk2a-Cre	Cre Negative	Camk2a-Cre	Cre Negative
Input reads for alignment	293933	74942	305695	65897	652746	20033
Uniquely mapped to genome	210529	43779	231352	45084	514397	13635
Mapped within transcriptome and collapsed for PCR duplicates	159468	23079	154824	24742	403358	10047
Mapped within CA1 TRAP defined transcriptome for CLIP score determination	136963	17266	121397	17922	333927	7703
