# Supplementary material for: FMRP has a cell-type-specific role in CA1 pyramidal neurons to regulate autism-related transcripts and circadian memory
Source: eLife. 2019 Dec 20;8:e46919. doi: 10.7554/eLife.46919 (PMC6924960; doi:10.7554/eLife.46919)
Supplement: Supplementary file 2. — FMRP cTag CLIP data including counts per transcript, CLIP scores, FMRP target classifications and CA1 or granule cell-enriched binding. CA1 CLIP. CLIP tags that mapped within the coding region of each transcript were counted for each CLIP replicate and the final read count calculated by subtracting the number of CLIP reads in the Cre negative control from the number of CLIP reads from the Camk2a-Cre sample (CDS counts). These counts were converted to RPKM based on the length of the coding region. After normalization to abundance using TRAP RPKM per transcript as a proxy, the CLIP score for the transcript was calculated. CA1 Targets. List of transcripts classified as stringent, high binding or low-binding FMRP Targets in CA1 neurons. Stringent targets have a CLIP score > 2 in all three replicates, high binding targets have a mean CLIP score > 1 and low binding targets have a mean CLIP score between 0 and 1. Granule Cell CLIP. FMRP cTag CLIP was performed from cerebellar granule cells using Neurod1-Cre. Table of transcript information and CLIP scores is reproduced from Van Driesche et al. (2019). Granule Cell Targets. List of transcripts classified as stringent, high binding or low-binding FMRP Targets in cerebellar granule cells. Stringent targets have a CLIP score > 2 in all three replicates, high binding targets have a mean CLIP score > 1 and low binding targets have a mean CLIP score between 0 and 1. Enriched CA1. Transcripts with significantly higher binding in CA1 compared to cerebellar granule cells. Differential CLIP scores were determined using Limma. Log2 fold change and p-values are reported. Enriched Granule Cell. Transcripts with significantly higher binding in cerebellar granule cells compared to CA1 neurons. Differential CLIP scores were determined using Limma. Log2 fold change and p-values are reported. [file elife-46919-supp2.xlsx]

## Sheet: CA1 CLIP
RefSeq Transcript	Gene Symbol	Start Codon	Stop Codon	Transcript Length	WT TRAP rpkm	Camk2a CLIP CDS reads	Neg CLIP CDS reads	Camk2a CLIP CDS reads	Neg CLIP CDS reads	Camk2a CLIP CDS reads	Neg CLIP CDS reads	CDS reads (Camk2a - Neg)	CDS reads (Camk2a - Neg)	CDS reads (Camk2a - Neg)	CLIP RPKM	CLIP RPKM	CLIP RPKM	CLIP Score	CLIP Score	CLIP Score	Mean CLIP Score
						replicate 1	replicate 1	replicate 2	replicate 2	replicate 3	replicate 3	replicate 1	replicate 2	replicate 3	replicate 1	replicate 2	replicate 3	replicate 1	replicate 2	replicate 3
NM_001039000	Kif5a	467	3551	6311	222.057	2861	154	2529	283	5265	120	2707	2246	5145	9920.73	10361.2	7210.88	7.06839	6.95971	6.623	6.8837
NM_007462	Apc	311	8840	12449	38.8672	1794	146	1329	162	3614	64	1648	1167	3550	2183.88	1946.64	1799.07	5.96599	5.62413	5.9603	5.85014
NM_001204165	Rapgef4	72	3108	4206	41.2199	517	39	479	65	1127	16	478	414	1111	1779.49	1940.04	1581.72	5.63411	5.58293	5.72935	5.6488
NM_001110796	Pclo	304	14896	16895	15.2634	1025	65	694	68	1955	53	960	626	1902	743.577	610.34	563.395	4.9915	4.52821	5.00407	4.84126
NM_011049	Cdk16	387	1878	3112	26.6424	120	6	83	4	247	7	114	79	240	864.165	753.81	695.746	4.86276	4.4887	4.8801	4.74385
NM_001081154	Marf1	190	5401	7765	20.6463	348	18	232	12	659	9	330	220	650	715.752	600.64	539.15	4.74908	4.3185	4.7083	4.59196
NM_178655	Ank2	267	3420	5770	59.4487	262	17	262	22	672	9	245	240	663	878.237	1082.93	908.881	4.38815	4.51558	4.64841	4.51738
NM_001081153	Unc13c	0	6633	8081	3.46908	195	19	143	6	309	4	176	137	305	299.897	293.848	198.75	4.60059	4.38886	4.64023	4.54323
NM_008634	Map1b	115	7510	11852	168.012	1237	65	882	100	2639	59	1172	782	2580	1791.26	1504.46	1507.99	4.77194	4.34813	4.57993	4.56667
NM_170728	Ank3	514	5695	9320	26.4131	288	27	277	21	703	15	261	256	688	569.373	702.974	573.974	4.26619	4.39331	4.60917	4.42289
NM_008960	Pten	868	2080	8212	44.695	113	7	71	8	202	6	106	63	196	988.491	739.521	698.99	4.73573	4.14151	4.48896	4.4554
NM_001034115	Shank1	76	6580	7596	20.7791	335	16	285	20	771	16	319	265	755	554.345	579.666	501.746	4.37643	4.26326	4.59964	4.41311
NM_021287	Sptbn2	444	7611	8235	90.1139	599	37	688	72	1675	24	562	616	1651	886.275	1222.8	995.697	4.14325	4.43388	4.46015	4.34576
NM_133769	Cyfip2	155	3917	6368	229.537	591	32	407	31	1247	24	559	376	1223	1679.43	1421.94	1405.16	4.48537	4.074	4.23808	4.26582
NM_001294150	Kif1a	59	5156	8158	238.137	768	47	606	91	1767	25	721	515	1742	1598.79	1437.49	1477.24	4.39155	4.06697	4.28196	4.24683
NM_175836	Sptbn1	46	7138	8239	43.9575	475	45	428	51	1075	29	430	377	1046	685.282	756.285	637.5	4.21752	4.18413	4.36891	4.25685
NM_016965	Nckap1	217	3604	4387	324.499	582	49	473	46	1331	28	533	427	1303	1778.61	1793.6	1662.83	4.35337	4.19512	4.21473	4.25441
NM_080455	Tshz2	94	3187	5113	12.8896	145	3	74	11	237	2	142	63	235	518.893	289.783	328.402	4.57732	3.55799	4.35537	4.16356
NM_021523	Huwe1	453	13590	14624	41.2361	846	68	668	74	1761	39	778	594	1722	669.35	643.284	566.571	4.22323	3.99013	4.24788	4.15375
NM_001143849	Pde2a	100	2887	4053	152.904	351	13	237	20	645	11	338	217	634	1370.72	1107.73	983.263	4.44436	3.9647	4.03541	4.14816
NM_001033263	Agap2	715	4276	5634	169.066	354	17	375	51	1018	25	337	324	993	1069.62	1294.45	1205.3	4.02418	4.12736	4.25188	4.13447
NM_001025259	Mbp	117	504	1985	23.1407	15	5	14	2	82	2	10	12	80	292.051	441.147	893.504	3.38509	3.8028	5.34938	4.17909
NM_001160222	Pum2	55	3013	5876	38.0526	174	19	131	16	415	5	155	115	410	592.247	553.111	599.105	4.09651	3.82187	4.39022	4.10287
NM_026361	Pkp4	284	3857	4614	44.7652	265	12	158	19	457	6	253	139	451	800.308	553.47	545.583	4.43008	3.72246	4.13028	4.09427
NM_007567	Bsn	125	11954	15937	25.7489	510	34	439	60	1430	26	476	379	1404	454.808	455.831	513.023	3.95787	3.78407	4.4668	4.06958
NM_011767	Zfr	60	3285	4596	105.722	346	30	222	20	612	10	316	202	602	1107.46	891.116	806.834	4.36558	3.87871	4.03387	4.09272
NM_007864	Dlg4	315	2490	3327	146.144	211	2	177	20	503	10	209	157	493	1086.07	1026.96	979.727	4.13658	3.88339	4.06498	4.02832
NM_010437	Hivep2	833	8126	9768	104.697	703	33	476	38	1377	15	670	438	1362	1038.34	854.438	807.213	4.27865	3.82409	4.04204	4.04826
NM_001173506	Map1a	463	8794	11539	167.114	744	49	764	84	2306	47	695	680	2259	942.882	1161.25	1172.02	3.84944	3.97787	4.22043	4.01591
NM_001039386	Nsmf	222	1821	2933	109.902	126	7	119	16	329	7	119	103	322	841.14	916.434	870.412	3.94469	3.89517	4.11347	3.98444
NM_021494	Dennd5a	240	4104	4956	45.9113	191	13	196	22	539	11	178	174	528	520.658	640.656	590.628	3.79418	3.91788	4.22529	3.97912
NM_008632	Map2	447	1851	5427	110.988	125	8	105	15	270	4	117	90	266	941.864	911.986	818.902	4.10177	3.88208	4.01791	4.00058
NM_001290760	Tbc1d9b	79	3871	5249	27.1897	168	9	153	22	355	10	159	131	345	473.913	491.491	393.249	3.98346	3.8591	4.04135	3.9613
NM_011245	Rasgrf1	223	4012	4228	166.047	456	27	286	25	802	9	429	261	793	1279.68	980.006	904.619	4.29405	3.73701	3.85173	3.96093
NM_011807	Dlg2	221	2780	7409	60.0409	178	14	131	14	341	7	164	117	334	724.341	650.471	564.149	4.10406	3.77408	3.95277	3.94364
NM_001291452	Lrrc7	1289	5777	7321	36.6108	239	11	186	28	484	12	228	158	472	574.185	500.861	454.576	4.07579	3.70257	4.02164	3.93334
NM_010239	Fth1	224	773	942	119.065	57	9	37	6	111	5	48	31	106	988.186	803.345	834.547	4.12745	3.65569	3.99119	3.92478
NM_008614	Mobp	139	385	3286	3.87429	3	0	4	1	11	0	3	3	11	137.834	173.5	193.275	3.41052	3.56048	4.51497	3.82866
NM_001002004	2610507B11Rik	96	6801	7443	40.729	313	32	303	45	862	19	281	258	843	473.671	547.436	543.433	3.73203	3.76501	4.19725	3.8981
NM_010897	Nf1	108	8634	11847	27.8574	366	30	292	38	796	14	336	254	782	445.414	423.839	396.441	3.87893	3.63047	4.03435	3.84792
NM_009622	Adcy1	111	3468	12259	105.18	246	14	222	16	544	12	232	206	532	781.099	873.029	684.98	3.8651	3.8523	3.80161	3.83967
NM_001190401	Usp34	79	10828	12200	19.4309	394	28	299	31	774	23	366	268	751	384.842	354.715	301.988	3.89153	3.59614	3.91876	3.80214
NM_025451	Camk2n1	38	275	3613	54.123	13	1	10	1	32	3	12	9	29	572.272	540.265	528.892	3.82847	3.57036	3.93947	3.77943
NM_022656	Nisch	164	4946	5586	79.9463	296	16	249	21	703	13	280	228	690	661.787	678.325	623.673	3.79613	3.6577	3.8773	3.77704
NM_009481	Usp9x	394	8059	11903	62.9137	430	36	353	45	1056	30	394	308	1026	580.97	571.678	578.566	3.75686	3.55892	3.95324	3.75634
NM_001164225	Fbxl16	316	1756	3499	131.194	104	7	93	8	270	2	97	85	268	761.34	839.787	804.433	3.69103	3.65977	3.86357	3.73813
NM_001185020	Wnk1	1023	7410	9811	13.505	170	20	129	16	442	15	150	113	427	265.439	251.706	288.967	3.58133	3.32595	4.13495	3.68074
NM_013697	Ttr	189	633	1221	7.66925	7	1	8	1	27	2	6	7	25	152.735	224.299	243.374	3.13501	3.50916	4.32236	3.65551
NM_181421	Gm15800	253	13510	15482	46.5644	639	35	500	59	1490	38	604	441	1452	514.946	473.267	473.411	3.7695	3.47226	3.89527	3.71234
NM_001128180	Dlgap1	78	2127	5306	99.5584	146	8	97	11	317	9	138	86	308	761.214	597.13	649.72	3.86197	3.33824	3.76761	3.65594
NM_001168572	Brsk1	152	1184	1368	34.766	41	1	39	3	83	2	40	36	81	438.076	496.29	339.252	3.71753	3.72129	3.63924	3.69269
NM_008615	Me1	164	1883	3257	16.8083	14	2	1153	645	60	6	12	508	54	78.8996	4204.37	135.78	1.6953	7.25286	2.87704	3.94173
NM_177379	Arhgap32	383	5606	9969	43.4491	253	13	164	19	553	10	240	145	543	519.351	394.967	449.363	3.82475	3.25411	3.87331	3.65072
NM_177407	Camk2a	147	1584	4956	380.984	191	19	141	21	405	7	172	120	398	1352.82	1188.06	1197.14	3.85904	3.50174	3.61728	3.65935
NM_146019	Chd3	35	6203	7281	96.4198	412	31	376	53	754	18	381	323	736	698.152	745.025	515.764	3.75708	3.67727	3.45914	3.63116
NM_001199137	Macf1	171	16158	17414	9.49944	326	30	287	44	835	30	296	243	805	209.264	216.248	217.644	3.45653	3.32422	3.99658	3.59244
NM_001164503	Akap11	201	5886	9416	106.168	394	23	303	30	844	16	371	273	828	737.587	683.195	629.531	3.77661	3.49279	3.67264	3.64735
NM_145599	Tmem184c	428	2297	2682	18.8881	62	3	37	4	121	3	59	33	118	356.79	251.199	272.892	3.79991	3.11581	3.79439	3.57003
NM_172579	Sipa1l1	401	5750	7492	34.1025	213	17	175	22	453	13	196	153	440	414.146	406.941	355.547	3.64844	3.44683	3.72174	3.60567
NM_001282093	Wac	354	2160	5049	15.134	60	4	24	2	112	2	56	22	110	350.461	173.308	263.264	3.91156	2.71719	3.91298	3.51391
NM_011162	Mapk8ip1	137	2261	2934	48.2481	88	2	70	6	227	4	86	64	223	457.629	428.685	453.803	3.57723	3.30758	3.80693	3.56391
NM_175510	Unc80	0	9981	13533	36.3621	418	17	302	35	849	15	401	267	834	454.088	380.583	361.168	3.74148	3.31059	3.69503	3.58236
NM_001029889	Usf3	299	6965	12606	6.51738	147	5	85	12	213	2	142	73	211	240.765	155.801	136.815	3.89256	3.08397	3.61657	3.53103
NM_177751	Cnksr2	357	3456	5504	143.865	265	21	185	11	428	6	244	174	422	889.893	798.804	588.584	3.85893	3.53064	3.34194	3.57717
NM_030595	Nbea	466	9277	10983	74.8575	435	22	377	48	1124	30	413	329	1094	529.779	531.231	536.673	3.51596	3.34568	3.71113	3.52426
NM_001253369	Kcnma1	80	3710	5037	38.1454	126	7	134	16	301	1	119	118	300	370.519	462.475	357.217	3.41835	3.56217	3.64234	3.54095
NM_133833	Dst	0	16140	17210	15.3886	375	27	350	62	1019	16	348	288	1003	243.694	253.864	268.605	3.37702	3.25761	3.92913	3.52125
NM_010498	Ids	182	1841	4973	40.0029	59	6	61	7	155	6	53	54	149	361.076	463.084	388.202	3.35161	3.5347	3.72578	3.53737
NM_172679	4932438A13Rik	372	15390	15883	16.3779	398	35	293	39	923	15	363	254	908	273.19	240.621	261.331	3.5032	3.14183	3.8416	3.49554
NM_054093	Ube3b	481	3694	5191	14.6834	66	1	80	2	139	5	65	78	134	228.651	345.379	180.265	3.3142	3.73071	3.38983	3.47824
NM_172406	Trak2	444	3186	6240	29.7873	85	8	80	7	203	0	77	73	203	317.39	378.763	319.997	3.34849	3.42687	3.67379	3.48305
NM_001128084	Arhgap21	311	6179	6972	19.0654	168	12	138	19	307	4	156	119	303	300.472	288.516	223.188	3.54627	3.30986	3.49713	3.45109
NM_001290995	Kif1b	374	5825	10274	231.546	420	23	352	50	1182	22	397	302	1160	823.159	788.213	919.812	3.45123	3.21741	3.62006	3.42957
NM_001033150	Plekhm2	195	3297	4133	15.4128	60	2	66	3	165	0	58	63	165	211.327	288.942	229.911	3.17046	3.44336	3.70351	3.43911
NM_008170	Grin2a	0	4395	4512	147.772	325	14	232	29	631	13	311	203	618	799.781	657.128	607.781	3.68827	3.23242	3.36764	3.42944
NM_201245	Mprip	331	3445	8718	19.6777	80	9	70	13	194	2	71	57	192	257.697	260.417	266.502	3.30511	3.1425	3.72871	3.39211
NM_172882	Wdfy3	545	11072	14277	29.0264	335	9	232	29	787	19	326	203	768	350.012	274.349	315.336	3.50569	2.97757	3.67253	3.38526
NM_008982	Ptprj	60	4113	7634	39.0822	172	13	108	12	292	6	159	96	286	443.394	336.982	305.005	3.66234	3.09049	3.39571	3.38285
NM_175229	Srrm2	258	8082	8598	48.4851	350	28	212	25	713	23	322	187	690	465.154	340.036	381.187	3.59772	2.97033	3.55159	3.37321
NM_013881	Ulk2	516	3630	5813	27.1861	104	6	62	7	215	4	98	55	211	355.694	251.279	292.874	3.56956	2.89131	3.61629	3.35905
NM_194340	Prr14l	305	6221	10546	18.2639	140	5	125	9	291	1	135	116	290	257.914	278.96	211.879	3.35258	3.2878	3.45515	3.36517
NM_001159634	Prrc2b	198	6891	10686	53.1131	263	12	221	39	639	15	251	182	624	423.86	386.868	402.978	3.40704	3.10017	3.56168	3.3563
NM_018814	Pcnx	342	7377	12139	21.4915	175	8	147	17	443	8	167	130	435	268.301	262.901	267.265	3.30859	3.10173	3.66504	3.35845
NM_009706	Arhgap5	171	4683	5197	37.43	161	16	123	23	361	6	145	100	355	363.219	315.314	340.076	3.40139	3.02129	3.58596	3.33621
NM_010585	Itpr1	350	8600	9877	174.687	549	29	493	48	1161	12	520	445	1149	712.392	767.395	601.982	3.41754	3.35285	3.22513	3.33184
NM_207215	Mycbp2	283	14524	15233	44.1339	529	37	408	55	1122	27	492	353	1095	390.476	352.652	332.346	3.40357	3.08097	3.42609	3.30354
NM_001159591	Csnk1g2	316	1564	2259	19.7469	27	2	35	5	61	2	25	30	59	226.41	341.995	204.341	3.11619	3.53348	3.34284	3.33084
NM_001025432	Crebbp	181	7507	7507	19.9718	179	12	138	13	432	11	167	125	421	257.643	242.748	248.389	3.2956	3.03197	3.61576	3.31445
NM_001081045	Kansl1	650	3761	5510	11.9574	66	4	45	5	125	5	62	40	120	225.248	182.925	166.724	3.41997	2.94064	3.43511	3.26524
NM_013507	Eif4g2	332	3053	7760	60.7925	103	10	86	19	319	9	93	67	310	386.299	350.315	492.437	3.1894	2.87356	3.74707	3.27001
NM_181074	Lingo1	466	2311	3295	54.5724	86	6	48	9	160	3	80	39	157	490.076	300.733	367.808	3.59964	2.72006	3.40909	3.24293
NM_011952	Mapk3	20	1163	1772	13.1327	24	2	21	1	40	1	22	20	39	217.543	248.941	147.481	3.31159	3.32728	3.18607	3.27498
NM_010432	Hipk1	283	3916	8049	24.3447	98	7	63	11	258	5	91	52	253	283.104	203.634	301.004	3.30873	2.65619	3.74068	3.2352
NM_001081109	Lmtk2	238	4654	8114	50.3003	154	11	127	10	365	7	143	117	358	365.996	376.938	350.406	3.22904	3.09626	3.40185	3.24238
NM_001190376	Camta2	284	3896	4632	64.8793	135	7	125	12	332	7	128	113	325	400.527	445.085	388.913	3.20121	3.1788	3.35655	3.24552
NM_001002005	Panx2	348	2382	3412	8.72625	36	1	23	0	64	2	35	23	62	194.485	160.875	131.752	3.40354	2.94992	3.33772	3.23039
NM_009441	Ttc3	134	6074	7295	265.814	473	42	394	52	1037	24	431	342	1013	820.088	819.129	737.124	3.36022	3.18766	3.19448	3.24745
NM_010864	Myo5a	427	5989	11684	79.1371	254	16	181	22	583	14	238	159	569	483.633	406.704	442.18	3.34999	2.92598	3.38896	3.22165
NM_023045	Xpo7	99	3363	15118	7.14419	47	3	34	5	117	2	44	29	115	152.36	126.404	152.288	3.17546	2.72558	3.70053	3.20052
NM_172887	Fry	339	9402	10730	42.862	290	18	234	20	669	8	272	214	661	339.208	335.934	315.244	3.21865	3.02897	3.37236	3.20666
NM_198111	Akap6	94	7018	10263	52.698	236	22	222	30	561	7	214	192	554	349.322	394.509	345.836	3.13288	3.13323	3.3471	3.2044
NM_172739	Arhgap35	713	5213	8393	57.9755	171	12	144	21	376	4	159	123	372	399.35	388.871	357.312	3.26677	3.0535	3.3208	3.21369
NM_175514	Fam171b	21	2487	3394	71.6548	114	6	71	8	222	3	108	63	219	494.994	363.463	383.856	3.44511	2.82516	3.26127	3.17718
NM_001042743	Mast2	266	5669	5724	15.8749	114	5	78	8	255	5	109	70	250	228.014	184.321	199.997	3.26177	2.77656	3.47969	3.17267
NM_012005	Med14	274	4588	5080	17.1025	99	1	61	7	204	3	98	54	201	256.753	178.085	201.388	3.38682	2.68088	3.43241	3.1667
NM_001100591	Rc3h2	239	3803	8967	21.7447	87	6	71	5	168	3	81	66	165	256.872	263.463	200.108	3.23852	3.09758	3.23853	3.19154
NM_020027	Prrc2a	206	6683	6868	27.8521	153	10	138	21	417	7	143	117	410	249.535	256.995	273.607	3.04315	2.90881	3.4995	3.15049
NM_027258	Rnf157	248	2294	4655	50.9468	82	4	45	5	158	1	78	40	157	430.882	278.142	331.674	3.45658	2.64987	3.31277	3.13974
NM_001040106	Aak1	536	3416	19345	32.5346	86	6	66	10	177	4	80	56	173	313.955	276.636	259.64	3.27806	2.91907	3.3044	3.16718
NM_010881	Ncoa1	712	4930	7329	34.2166	114	7	104	8	254	5	107	96	249	286.713	323.8	255.159	3.11584	3.11505	3.24052	3.15714
NM_001286263	Ralgapa1	749	6998	8403	41.3052	190	11	153	15	438	7	179	138	431	323.752	314.182	298.115	3.17432	2.95524	3.32021	3.14992
NM_011785	Akt3	46	1486	4735	44.9028	59	1	34	5	90	3	58	29	87	455.234	286.516	261.14	3.61423	2.77067	3.06494	3.14995
NM_011246	Rasgrp1	168	2556	5105	275.533	182	13	127	8	414	1	169	119	413	799.875	708.966	747.538	3.30194	2.9571	3.18711	3.14871
NM_001024952	Rc3h1	439	3832	11011	6.90553	60	3	30	6	94	2	57	24	92	189.872	100.633	117.198	3.51408	2.41763	3.34881	3.09351
NM_181039	Adgrl1	919	5320	8188	102.642	238	14	137	24	497	17	224	113	480	575.263	365.292	471.419	3.43897	2.61041	3.28135	3.11024
NM_001291137	Ralgapb	281	4805	8414	28.569	123	7	88	9	258	10	116	79	248	289.804	248.437	236.944	3.24322	2.84426	3.2724	3.11996
NM_028906	Dpp8	287	2966	4764	58.7578	92	10	88	4	202	3	82	84	199	345.948	446.087	321.069	3.05135	3.24326	3.15619	3.15027
NM_011749	Zfp148	487	2872	9431	18.9333	61	2	40	8	97	0	59	32	97	279.597	190.886	175.793	3.44671	2.71821	3.1581	3.10767
NM_030238	Dync1h1	210	14145	14398	56.2654	445	25	407	51	1131	23	420	356	1108	340.653	363.459	343.677	3.05599	2.9745	3.2877	3.10606
NM_001081370	Shank2	584	4373	5913	19.5755	72	6	67	9	192	2	66	58	190	196.874	217.779	216.744	2.91994	2.88776	3.43456	3.08075
NM_001029934	Usp32	187	5002	6924	38.5367	128	9	127	12	303	5	119	115	298	279.332	339.793	267.508	3.00445	3.11115	3.21728	3.11096
NM_001252313	Ncor1	70	7435	8852	41.3289	222	13	170	10	480	8	209	160	472	320.733	309.072	277.004	3.16045	2.93123	3.21381	3.10183
NM_007561	Bmpr2	374	3491	11087	51.1004	122	11	65	9	244	2	111	56	242	402.491	255.602	335.58	3.35637	2.52608	3.32735	3.06993
NM_001281491	Syngap1	0	4023	4023	81.2839	175	7	113	12	382	8	168	101	374	471.986	357.177	401.827	3.29822	2.72211	3.23032	3.08355
NM_010414	Htt	167	9530	13219	20.59	171	8	152	12	487	11	163	140	476	196.762	212.728	219.74	2.88777	2.8227	3.41551	3.04199
NM_001289474	Erbb2ip	398	4283	6196	6.00534	31	4	43	7	135	4	27	36	131	78.5493	131.833	145.746	2.32737	2.89352	3.77073	2.99721
NM_001033550	Lrrc8b	315	2727	2841	16.9742	45	2	33	1	109	2	43	32	107	201.493	188.749	191.745	3.04185	2.76945	3.36741	3.05957
NM_001081362	Trrap	117	11661	12476	7.56388	159	7	107	21	373	5	152	86	368	148.818	105.988	137.787	3.10611	2.43618	3.51227	3.01819
NM_001128308	Dock9	467	6596	8182	73.5931	230	23	185	27	557	10	207	158	547	381.725	366.758	385.758	3.05367	2.8217	3.24788	3.04108
NM_033565	Aff4	367	3850	10165	53.4976	129	15	95	11	236	5	114	84	231	369.931	343.114	286.666	3.20623	2.92256	3.0648	3.06453
NM_001013806	Ankrd13c	61	1687	2654	15.3198	32	4	19	3	83	2	28	16	81	194.629	139.995	215.319	3.05546	2.40169	3.61356	3.02357
NM_172298	Tshz3	132	3378	5002	7.38651	43	1	30	1	87	1	42	29	86	146.241	127.105	114.516	3.09563	2.71296	3.26363	3.02407
NM_001160319	Ubr4	28	15571	15873	14.6307	241	12	206	25	687	11	229	181	676	166.521	165.675	187.988	2.85899	2.6731	3.45311	2.99507
NM_008306	Ndst1	154	2803	6085	17.6873	49	4	38	4	123	1	45	34	122	192	182.604	199.065	2.94669	2.69627	3.38982	3.01093
NM_029166	Uhrf1bp1l	254	4628	6446	29.8178	101	4	78	10	269	4	97	68	265	250.647	221.178	261.869	3.00726	2.65015	3.3838	3.01374
NM_008729	Ctnnd2	534	4275	5947	40.2699	117	6	74	13	254	7	111	61	247	335.355	231.982	285.382	3.24087	2.53333	3.27675	3.01699
NM_029633	Clasp2	147	4008	5624	84.3692	149	9	112	9	365	3	140	103	362	409.824	379.533	405.253	3.07137	2.78668	3.21392	3.02399
NM_001024857	Ttbk2	430	4162	11078	20.5738	69	5	60	5	180	2	64	55	178	193.824	209.669	206.156	2.86655	2.80228	3.32406	2.99763
NM_007907	Eef2	96	2673	3100	345.729	175	11	168	21	464	10	164	147	454	719.282	811.551	761.481	3.00793	3.01187	3.03924	3.01968
NM_173028	Vps13a	164	9665	11164	15.2787	168	6	138	14	352	5	162	124	347	192.715	185.68	157.862	3.04287	2.8108	3.16781	3.00716
NM_172771	Dmxl2	189	9354	10614	64.4164	308	22	241	23	717	18	286	218	699	352.698	338.405	329.657	3.02219	2.78789	3.12357	2.97788
NM_026484	Ccny	479	1505	4017	34.3232	31	2	17	2	58	0	29	15	58	319.463	207.997	244.342	3.26995	2.47458	3.17564	2.97339
NM_001024624	Cdkl5	258	3075	3246	51.933	105	6	55	2	183	5	99	53	178	397.208	267.671	273.118	3.32729	2.58266	3.01779	2.97591
NM_011273	Xpr1	210	2298	7651	11.3031	35	2	27	6	65	1	33	21	64	178.629	143.087	132.485	3.12033	2.62105	3.14675	2.96271
NM_001004144	Git1	171	2484	3650	66.7961	64	4	69	6	182	3	60	63	179	293.187	387.505	334.499	2.73308	2.96095	3.11671	2.93691
NM_183208	Zmiz1	606	3825	7521	9.98844	50	5	35	2	90	1	45	33	89	158.001	145.85	119.505	3.02001	2.72501	3.09308	2.94603
NM_001114664	Iqsec2	205	4645	5995	36.6081	94	10	87	9	299	9	84	78	290	213.829	249.933	282.314	2.65078	2.69975	3.33447	2.895
NM_001080819	Arid1a	0	6852	8175	13.0984	100	3	84	10	246	2	97	74	244	160.001	153.648	153.918	2.87	2.63272	3.24972	2.91748
NM_001134383	Iqsec1	257	3143	4526	60.8979	99	7	65	5	210	3	92	60	207	360.297	295.779	310.021	3.08779	2.62836	3.07817	2.93144
NM_008168	Grik5	380	3320	3840	38.3872	62	3	60	7	188	3	59	53	185	226.816	256.473	271.983	2.70641	2.7077	3.2442	2.8861
NM_001013741	Ddn	112	2245	3740	321.824	100	2	137	14	365	4	98	123	361	519.284	820.402	731.533	2.58235	3.07178	3.03646	2.89686
NM_178679	Zfp365	305	1532	4257	84.3664	44	0	38	3	89	2	44	35	87	405.301	405.822	306.473	3.05538	2.88333	2.81088	2.91653
NM_010434	Hipk3	544	4123	7497	18.9799	61	3	59	5	133	3	58	54	130	183.162	214.657	157	2.83495	2.88602	2.9931	2.90469
NM_010418	Herc2	169	14680	15348	51.9451	362	34	352	44	1038	13	328	308	1025	255.474	301.972	305.312	2.69042	2.75647	3.17837	2.87509
NM_054050	Rapgef1	283	3544	5837	15.3148	57	2	33	3	131	1	55	30	130	190.626	130.883	172.31	3.02568	2.3048	3.29234	2.87427
NM_001033285	Cdc42bpa	21	5220	8656	39.8454	129	10	103	10	316	12	119	93	304	258.7	254.493	252.738	2.87304	2.67349	3.10965	2.88539
NM_133207	Kcnh7	210	3798	3798	23.1328	81	7	50	5	158	2	74	45	156	233.104	178.432	187.927	3.06005	2.49713	3.10034	2.88584
NM_028601	Zmiz2	225	2988	4053	21.6649	59	3	34	10	151	5	56	24	146	229.075	123.579	228.396	3.07556	2.00768	3.43212	2.83845
NM_001080931	Med13	0	6516	11787	14.5853	99	8	90	5	214	8	91	85	206	157.845	185.588	136.648	2.78372	2.83878	2.99533	2.87261
NM_001033173	Usp31	0	4035	10198	20.3762	73	4	63	9	168	8	69	54	160	193.275	190.398	171.393	2.86845	2.66915	3.06505	2.86755
NM_008963	Ptgds	76	646	806	20.3354	5	0	18	4	24	2	5	14	22	99.1436	349.435	166.827	1.90663	3.54639	3.02763	2.82689
NM_008719	Npas2	496	2947	4180	5.4186	26	1	18	1	50	1	25	17	49	115.283	98.6775	86.4112	2.94466	2.53911	3.09562	2.8598
NM_175162	Stox2	338	2744	9316	16.039	38	6	39	3	73	1	32	36	72	150.322	212.872	129.346	2.65433	2.97797	2.84304	2.82512
NM_176942	Gabra5	344	1736	2674	63.3057	48	3	34	2	81	2	45	32	79	365.378	327.057	245.304	3.08394	2.74942	2.71055	2.84797
NM_001290715	Adgrb2	15	4701	4996	110.732	167	11	156	15	436	5	156	141	431	376.263	428.084	397.551	2.77942	2.79239	2.97713	2.84965
NM_001006664	Epb41l1	487	3127	6523	61.4034	74	5	62	11	209	5	69	51	204	295.403	274.839	333.998	2.79616	2.51732	3.17928	2.83092
NM_181071	Tanc2	287	6272	11860	37.051	149	6	106	14	331	2	143	92	329	270.048	218.694	237.601	2.98008	2.49969	3.07647	2.85208
NM_138679	Ash1l	100	8977	11270	24.4724	207	8	126	15	370	2	199	111	368	253.371	177.897	179.184	3.14541	2.45803	2.98832	2.86392
NM_181750	R3hdm1	427	3835	4812	24.8151	66	6	61	7	142	4	60	54	138	198.985	225.427	175.024	2.78819	2.79105	2.94373	2.84099
NM_001081116	Arhgef17	422	6596	10250	20.1233	94	4	88	15	279	1	90	73	278	164.758	168.217	194.624	2.64588	2.49817	3.25803	2.80069
NM_015753	Zeb2	526	4174	9235	52.1415	121	6	65	13	262	9	115	52	253	356.297	202.797	299.766	3.16799	2.17976	3.14902	2.83226
NM_001024602	Cep170b	236	4961	6640	49.0404	132	5	102	19	296	5	127	83	291	303.789	249.913	266.2	2.97601	2.51903	3.02485	2.83996
NM_172827	Lnpep	77	3155	5181	33.2997	69	9	62	6	145	4	60	56	141	220.319	258.84	198.001	2.75268	2.80878	2.89553	2.819
NM_172994	Ppp2r2c	251	1595	4031	131.589	60	5	45	4	125	2	55	41	123	462.523	434.007	395.57	2.97015	2.70561	2.83722	2.83766
NM_172424	Med13l	67	6691	9296	14.0014	104	12	79	11	223	1	92	68	222	156.977	146.05	144.861	2.80112	2.51837	3.11095	2.81015
NM_008904	Ppargc1a	139	2533	6464	7.17027	34	0	15	0	53	1	34	15	52	160.518	89.1415	93.8851	3.24845	2.21946	2.99989	2.8226
NM_001036684	Atp2b2	439	4036	6905	163.031	166	7	135	11	354	7	159	124	347	499.604	490.449	416.972	2.94849	2.74964	2.74846	2.81553
NM_138659	Prpf8	315	7323	7481	65.1596	240	15	149	22	502	11	225	127	491	362.876	257.823	302.834	3.05612	2.38844	2.99231	2.81229
NM_001145959	Ndrg2	172	1246	2115	25.1055	13	2	17	2	72	3	11	15	69	115.76	198.701	277.691	1.99945	2.6018	3.60072	2.73399
NM_001081371	Dmxl1	93	9135	12211	16.4561	140	14	113	13	337	9	126	100	328	157.498	157.343	156.793	2.70568	2.52604	3.10092	2.77755
NM_001102430	Arfgef1	176	5717	7042	41.7155	150	9	103	13	305	7	141	90	298	287.608	231.082	232.459	2.9974	2.50594	2.95371	2.81902
NM_008449	Kif5c	348	3219	6840	255.941	157	16	139	18	369	15	141	121	354	555.08	599.604	532.951	2.82062	2.76096	2.75569	2.77909
NM_080448	Srgap3	770	4070	8887	47.2711	91	3	62	6	186	3	88	56	183	301.397	241.427	239.693	2.9874	2.49189	2.90178	2.79369
NM_177798	Frs2	355	1882	5684	6.85929	15	2	12	1	39	1	13	11	38	96.2219	102.486	107.563	2.53766	2.44812	3.2302	2.73866
NM_001303033	Ubr3	49	5731	8081	40.5042	140	15	101	21	338	4	125	80	334	248.644	200.309	254.075	2.80566	2.31797	3.10466	2.74276
NM_001033276	Kmt2d	229	16996	19827	5.78223	150	14	126	18	386	11	136	108	375	91.6755	91.6391	96.6703	2.57379	2.39223	3.20753	2.72452
NM_013675	Sptb	667	7657	10394	15.0502	84	3	84	8	255	6	81	76	249	130.972	154.685	153.971	2.495	2.55662	3.1434	2.73167
NM_001289472	Pitpnm2	342	4350	6924	22.2577	65	3	57	9	173	4	62	48	169	174.837	170.383	182.254	2.66901	2.45436	3.08577	2.73638
NM_001100452	Gltscr1l	422	3647	6579	5.67378	41	1	21	7	71	1	40	14	70	140.184	61.7605	93.8179	3.19826	1.83465	3.17888	2.73726
NM_153413	Dock3	401	6494	9063	56.628	171	7	110	10	401	3	164	100	398	304.216	233.497	282.338	2.8888	2.33214	2.99913	2.74002
NM_001081035	Nav3	0	7101	7782	19.8045	119	12	96	11	268	4	107	85	264	170.308	170.299	160.695	2.70359	2.52578	2.99395	2.74111
NM_008226	Hcn2	35	2627	3195	16.7209	41	3	31	5	96	5	38	26	91	165.698	142.709	151.748	2.769	2.37534	3.04146	2.7286
NM_175310	Pds5b	146	4487	7308	34.9162	107	10	74	14	216	3	97	60	213	252.552	196.641	212.084	2.92026	2.383	2.9582	2.75382
NM_021423	Shank3	0	5193	7131	11.1485	49	1	54	4	168	3	48	50	165	104.47	136.982	137.336	2.355	2.56664	3.20921	2.71029
NM_001037877	Tcf25	162	2043	3062	217.609	82	6	82	11	223	5	76	71	218	456.662	537.01	500.939	2.6397	2.70212	2.79109	2.71097
NM_001039198	Zfhx2	90	7779	8725	2.69023	47	1	32	0	115	0	46	32	115	67.6173	59.2097	64.6465	2.60933	2.23476	3.21545	2.68651
NM_019445	Fmn2	221	4958	6442	3.93991	31	2	37	8	84	1	29	29	83	69.1933	87.0978	75.7342	2.40588	2.55588	3.15042	2.70406
NM_010956	Ogdh	123	3195	6615	54.443	66	7	70	10	214	5	59	60	209	217.07	277.871	294.064	2.42627	2.60746	3.0881	2.70728
NM_173018	Myo9a	243	8139	11974	24.6036	133	15	121	9	323	4	118	112	319	168.906	201.801	174.623	2.55706	2.63661	2.94701	2.71356
NM_172261	Ppp1r9b	336	2790	4330	80.535	62	7	78	12	187	10	55	66	177	253.313	382.633	311.757	2.40614	2.82715	2.87129	2.70152
NM_001081360	Camsap2	667	5104	7823	64.0272	140	10	91	10	280	5	130	81	275	331.149	259.722	267.893	2.935	2.40985	2.82892	2.72459
NM_016698	Rnf10	482	2897	3112	35.77	41	2	56	4	96	2	39	52	94	182.523	306.337	168.24	2.43677	3.00763	2.6055	2.6833
NM_001253905	Ncor2	370	7132	8146	9.62802	79	6	62	7	177	4	73	55	173	122.016	115.718	110.583	2.66994	2.41384	3.0094	2.69773
NM_011104	Prkce	808	3022	6254	144.486	79	5	78	14	235	8	74	64	227	377.767	411.259	443.165	2.62012	2.57018	2.92922	2.70651
NM_001034964	Sorbs1	43	2266	5275	8.16183	40	0	11	5	68	1	40	6	67	203.372	38.3994	130.272	3.50948	0.924439	3.37285	2.60225
NM_054040	Tulp4	757	5401	9696	25.6909	88	5	65	9	199	6	83	56	193	202.002	171.557	179.631	2.78838	2.37565	2.95455	2.70619
NM_145617	Herc1	198	14778	15229	37.8342	267	25	285	25	752	15	242	260	737	187.598	253.705	218.488	2.44153	2.70101	2.93939	2.69398
NM_001163262	Cmip	83	2405	4529	59.8537	47	2	59	2	136	2	45	57	134	219.038	349.241	249.436	2.38051	2.87874	2.77777	2.67901
NM_028816	Xpo6	507	3882	4453	18.998	64	3	41	12	133	4	61	29	129	204.28	122.247	165.209	2.99179	2.07319	3.06589	2.71029
NM_009920	Cnih2	258	741	1343	87.7897	9	1	17	1	40	0	8	16	40	187.203	471.287	357.956	1.91631	3.07451	3.00432	2.66505
NM_197943	Sgsm2	199	3217	4760	17.0248	40	5	41	6	107	1	35	35	106	131.075	164.991	151.811	2.41966	2.57353	3.02821	2.6738
NM_023328	Agtpbp1	158	3815	4417	99.3604	122	4	90	5	279	6	118	85	273	364.692	330.679	322.667	2.80158	2.48686	2.75937	2.6826
NM_007772	Hivep1	173	8240	8753	4.76971	79	1	54	11	134	3	78	43	131	109.283	75.8349	70.1902	2.94667	2.23805	2.89376	2.69283
NM_031881	Nedd4l	704	3272	8212	23.3176	42	4	40	5	93	4	38	35	89	167.247	193.904	149.8	2.57612	2.61218	2.76709	2.65179
NM_009167	Shc3	0	1425	1540	18.1746	21	0	19	2	42	1	21	17	41	166.561	169.725	124.362	2.72478	2.57397	2.69021	2.66299
NM_172836	9930021J03Rik	135	6420	8026	5.54094	66	2	48	4	91	2	64	44	89	115.092	99.6002	61.2071	2.92841	2.53875	2.58093	2.6827
NM_013883	Scmh1	459	2454	3394	4.5661	15	0	14	1	30	0	15	13	30	84.9802	92.7071	64.9974	2.61087	2.55481	2.81642	2.6607
NM_027526	Rasgef1a	60	1530	3236	83.0538	43	3	41	4	89	1	40	37	88	307.548	358.094	258.751	2.66692	2.7125	2.57875	2.65272
NM_008224	Hcfc1	354	6492	8138	19.6729	106	7	67	9	230	3	99	58	227	182.296	134.435	159.851	2.80587	2.18874	2.99149	2.66203
NM_001033634	Zyg11b	170	2405	10654	61.8854	59	4	49	12	150	1	55	37	149	278.134	235.525	288.155	2.70441	2.28978	2.96027	2.65149
NM_001083906	Nr3c2	35	2978	4087	67.7275	87	7	61	6	180	4	80	55	176	307.234	265.88	258.488	2.792	2.40895	2.73415	2.64503
NM_009572	Zhx1	697	3319	5105	20.217	45	4	32	5	93	1	41	27	92	176.734	146.502	151.661	2.74424	2.2959	2.89462	2.64492
NM_007566	Birc6	173	14795	15768	26.9511	231	20	194	25	700	12	211	169	688	163.097	164.434	203.376	2.45003	2.28489	3.09683	2.61058
NM_178880	Son	84	7419	8451	44.3651	159	11	126	15	388	12	148	111	376	228.051	215.296	221.567	2.62445	2.36581	2.83712	2.60913
NM_001286260	Nfat5	356	4034	4717	9.20078	51	2	29	5	78	1	49	24	77	150.575	92.8351	90.4891	3.00151	2.12401	2.75499	2.62684
NM_001271809	Pcdh11x	369	4362	8637	2.22892	32	0	17	2	33	0	32	15	33	90.5775	53.4447	35.7217	3.14778	2.20317	2.50433	2.61843
NM_001042488	Dlgap4	596	1454	2914	27.7097	6	0	20	1	39	0	6	19	39	79.0376	315.05	196.469	1.38769	3.20582	3.02564	2.53972
NM_027293	Dopey2	187	7075	7316	13.8506	89	9	64	6	217	4	80	58	213	131.27	119.797	133.661	2.54982	2.2392	3.00319	2.5974
NM_027707	Nipbl	418	8815	10216	7.33535	71	4	71	7	183	4	67	64	179	90.1821	108.435	92.1396	2.4025	2.48806	2.95531	2.61529
NM_001114140	Tcf20	185	6149	7354	39.7214	127	8	89	10	301	4	119	79	297	225.517	188.453	215.247	2.67692	2.24199	2.8804	2.59977
NM_001242558	Ncoa6	141	3375	3896	10.2591	34	1	28	3	82	0	33	25	82	115.33	109.98	109.595	2.54926	2.30125	2.94763	2.59938
NM_178065	Arel1	632	3104	5434	66.7934	54	2	55	4	153	4	52	51	149	237.752	293.518	260.528	2.43074	2.5602	2.75618	2.58237
NM_181058	Zbtb20	532	2539	2923	11.8172	25	5	18	3	66	4	20	15	62	112.63	106.33	133.525	2.42736	2.16522	3.12382	2.57213
NM_133500	Ntng2	59	1652	1747	8.45541	13	1	14	1	39	1	12	13	38	85.1403	116.102	103.106	2.23135	2.49885	3.00827	2.57949
NM_001290427	Frmpd4	292	4231	8223	32.5297	76	5	65	3	137	4	71	62	133	203.724	223.933	145.943	2.65421	2.61424	2.47341	2.58062
NM_031186	Ndst3	156	2778	5423	5.7413	20	1	21	1	40	0	19	20	40	81.9012	108.52	65.9393	2.41555	2.64055	2.66105	2.57238
NM_007881	Atn1	340	3868	4396	8.76495	28	0	24	1	104	4	28	23	100	89.7014	92.7496	122.515	2.28433	2.15266	3.22945	2.55548
NM_001177667	Sptan1	229	7663	8018	136.896	240	18	238	43	656	10	222	195	646	337.52	373.185	375.601	2.49107	2.46336	2.73208	2.56217
NM_001005424	Gm996	202	3127	4684	10.252	25	3	26	5	94	2	22	21	92	85.0093	102.142	135.95	2.10961	2.19502	3.25906	2.52123
NM_198618	Dlgap3	296	3230	3884	31.0587	49	3	47	7	119	2	46	40	117	177.201	193.96	172.363	2.48169	2.43552	2.74904	2.55542
NM_008448	Kif5b	417	3309	6030	62.4603	65	7	75	12	158	8	58	63	150	226.673	309.924	224.187	2.4035	2.6801	2.59102	2.55821
NM_001001983	Pi4ka	78	6213	6431	86.3345	172	6	117	12	477	7	166	105	470	305.818	243.493	331.132	2.63475	2.13212	2.90479	2.55722
NM_025877	Slc25a23	190	1594	3362	16.1658	18	1	14	3	51	1	17	11	50	136.852	111.465	153.929	2.514	2.0397	3.08801	2.54724
NM_001164268	Kalrn	47	5012	6430	166.299	162	10	171	16	448	7	152	155	441	346.014	444.145	383.916	2.40623	2.59431	2.61405	2.5382
NM_001081030	Sbf1	195	5799	6190	63.9843	123	9	108	23	413	8	114	85	405	229.92	215.791	312.374	2.40906	2.14293	3.05105	2.53435
NM_001277986	Snap91	219	2910	4330	94.4932	83	4	61	9	185	5	79	52	180	331.805	274.917	289.119	2.6964	2.25145	2.63961	2.52915
NM_001276465	Vps13d	161	13331	15846	14.9422	165	10	120	17	439	12	155	103	427	133.02	111.266	140.139	2.52185	2.08576	3.01314	2.54025
NM_175535	Arhgap20	156	3705	6365	24.7427	59	5	38	6	152	0	54	32	152	171.972	128.279	185.121	2.57951	1.97948	3.02689	2.52863
NM_023868	Ryr2	499	15400	16813	45.3876	287	24	273	32	734	15	263	241	719	199.485	230.099	208.56	2.41724	2.44767	2.73232	2.53241
NM_001081290	Prrc2c	286	8827	10444	21.8165	138	12	98	15	299	7	126	83	292	166.737	138.255	147.772	2.61299	2.16528	2.79859	2.52562
NM_010687	Large	1157	3428	4654	65.1925	51	2	49	6	128	4	49	43	124	243.864	269.379	236.005	2.48241	2.45138	2.63221	2.522
NM_011743	Zfp106	176	5843	9099	31.7663	107	10	84	11	209	1	97	73	208	193.459	183.266	158.645	2.59435	2.33978	2.61208	2.5154
NM_001294143	Hipk2	373	3883	4178	3.19881	15	1	18	2	60	1	14	16	59	45.0807	64.8523	72.6545	1.91703	2.25912	3.25077	2.47564
NM_133975	Trip12	125	6203	9632	42.9537	120	15	101	16	319	4	105	85	315	195.253	198.962	224.01	2.4205	2.27196	2.87781	2.52342
NM_177821	Ep300	415	7654	8749	11.5327	103	7	55	10	185	3	96	45	182	149.886	88.4396	108.67	2.85476	1.91449	2.84541	2.53822
NM_001165988	Ubap2l	101	3053	3627	16.5173	36	3	32	2	86	1	33	30	85	126.348	144.583	124.457	2.38544	2.40173	2.76486	2.51734
NM_008839	Pik3ca	55	3262	8917	12.9902	30	1	37	1	75	2	29	36	73	102.204	159.704	98.3878	2.22852	2.69362	2.61049	2.51087
NM_173068	Syt7	393	2097	6834	30.6994	25	3	27	4	77	0	22	23	77	145.923	192.031	195.316	2.20873	2.42828	2.93836	2.52512
NM_138306	Dgkz	117	2907	3494	174.402	81	4	98	9	274	4	77	89	270	311.929	453.835	418.289	2.2271	2.59606	2.70117	2.50811
NM_001271679	Wnk3	62	5195	10259	7.19747	42	5	33	3	123	2	37	30	121	81.4704	83.1501	101.89	2.26771	2.11674	3.11502	2.49983
NM_001081170	Pacs2	56	2735	5480	9.68663	22	3	25	4	74	2	19	21	72	80.1587	111.522	116.165	2.06004	2.35681	3.07578	2.49754
NM_009569	Zfpm1	342	3330	3386	4.34116	18	2	18	1	49	0	16	17	49	60.5214	80.9433	70.8815	2.15253	2.39025	2.9803	2.50769
NM_001163024	Mon2	543	5691	9300	13.829	63	3	41	4	156	0	60	37	156	131.729	102.253	130.98	2.55582	2.0117	2.97515	2.51422
NM_001193305	Mical2	335	3644	3680	155.331	113	6	96	7	278	5	107	89	273	365.474	382.654	356.602	2.52749	2.42147	2.56003	2.503
NM_011123	Plp1	168	1002	3473	81.6345	13	4	30	8	75	1	9	22	74	121.968	375.292	383.516	1.34331	2.79082	3.15972	2.43128
NM_001271798	Pcdh9	705	4317	6129	44.2763	80	8	54	9	178	5	72	45	173	225.296	177.246	207.022	2.60817	2.08649	2.74071	2.47845
NM_178005	Lrrtm2	428	1976	5673	16.0047	22	3	16	1	37	0	19	15	37	138.724	137.858	103.311	2.53982	2.35249	2.52045	2.47092
NM_133189	Cacng7	0	828	828	8.44256	10	0	6	1	14	0	10	5	14	136.502	85.9117	73.0828	2.9133	2.06532	2.51291	2.49718
NM_001160256	Smg7	109	3526	5803	26.7569	64	5	35	4	128	2	59	31	126	195.154	129.071	159.383	2.7134	1.94002	2.75074	2.46805
NM_016788	Tnk2	484	3652	4454	20.9327	39	3	34	3	117	2	36	31	115	128.436	139.216	156.903	2.26213	2.20081	2.91689	2.45994
NM_178078	Cnot1	303	7419	8375	24.0631	111	15	85	14	265	6	96	71	259	152.477	141.95	157.319	2.42321	2.14278	2.81354	2.45984
NM_026984	Kmt2e	469	6076	7258	14.7415	86	4	44	7	150	2	82	37	148	165.292	93.8823	114.09	2.84362	1.84901	2.72685	2.47316
NM_178407	Arap2	426	5538	7363	27.6274	71	5	74	6	179	3	66	68	176	145.923	189.248	148.812	2.27413	2.47235	2.62712	2.45787
NM_001025572	Ankrd12	214	6340	8991	17.5239	95	4	52	2	166	2	91	50	164	167.894	116.12	115.714	2.75889	2.0489	2.61427	2.47402
NM_001162917	Dennd4a	473	6083	8655	12.9055	66	4	50	4	133	7	62	46	126	124.91	116.656	97.0789	2.52201	2.24452	2.5962	2.45424
NM_198438	Ssbp3	387	1473	3114	13.9577	11	3	16	2	27	2	8	14	25	83.2587	183.405	99.501	1.88817	2.84887	2.57147	2.43617
NM_172430	Sphkap	189	5166	6512	91.4753	157	9	96	9	311	9	148	87	302	336.096	248.693	262.275	2.73507	2.12687	2.52399	2.46198
NM_007470	Apod	355	925	2074	2.63364	2	0	5	0	4	0	2	5	4	39.6574	124.798	30.3321	1.85271	3.32358	2.14007	2.43879
NM_177151	Vps13b	260	12242	13371	8.89791	114	8	83	8	272	5	106	75	267	99.9876	89.0522	96.3162	2.43161	2.08467	2.87076	2.46235
NM_001081383	Kmt2c	233	14948	16820	10.0428	143	15	129	12	302	4	128	117	298	98.3149	113.12	87.5333	2.33219	2.35503	2.63974	2.44232
NM_001159516	Qk	488	1448	5438	14.2863	8	3	9	1	42	1	5	8	41	58.8665	118.558	184.599	1.37358	2.20506	3.44519	2.34128
NM_027882	Cic	671	5486	6110	12.0931	55	5	36	6	144	6	50	30	138	117.366	88.6416	123.88	2.47247	1.88847	2.99791	2.45295
NM_144945	Lgi2	201	1854	6300	3.65384	11	0	8	2	25	1	11	6	24	75.2124	51.6406	62.7561	2.57298	1.84831	2.93719	2.45283
NM_080633	Aco2	50	2393	2768	291.422	98	7	91	10	267	4	91	81	263	438.974	491.842	485.178	2.40152	2.39495	2.52036	2.43894
NM_001177396	Anks1b	301	1834	4905	58.4154	39	2	29	3	61	0	37	26	61	272.79	241.293	171.991	2.71221	2.36033	2.26014	2.44423
NM_008739	Nsd1	111	8187	12784	38.1488	144	12	120	15	336	6	132	105	330	184.734	184.972	176.618	2.4142	2.24005	2.6261	2.42678
NM_029498	Zmym2	73	4204	6876	29.3659	78	9	49	6	150	4	69	43	146	188.783	148.09	152.762	2.6078	2.08085	2.61798	2.43554
NM_178725	Lrrc4c	858	2781	3492	39.1767	46	2	25	0	61	0	44	25	61	258.609	184.958	137.11	2.88302	2.22352	2.24036	2.44897
NM_008171	Grin2b	763	5212	7515	117.59	118	8	114	15	341	9	110	99	332	279.447	316.581	322.547	2.31298	2.31995	2.62929	2.42074
NM_011323	Scn8a	54	5991	11241	63.598	142	6	101	14	319	7	136	87	312	258.906	208.48	227.146	2.58411	2.09695	2.59606	2.42571
NM_029935	Chst15	560	2246	4265	14.2766	17	1	20	0	32	0	16	20	32	107.259	168.766	82.037	2.23958	2.71491	2.27567	2.41005
NM_197987	Trim37	399	3285	5637	126.807	82	7	80	12	210	0	75	68	210	293.721	335.216	314.514	2.33803	2.35585	2.53488	2.40959
NM_011240	Ranbp2	128	9290	9477	38.2211	156	11	134	16	378	3	145	118	375	178.874	183.233	176.912	2.36652	2.22526	2.62705	2.40627
NM_026556	Dynll2	298	568	2476	29.7408	7	2	3	0	8	0	5	3	8	209.303	158.078	128.069	2.7488	2.16717	2.35386	2.42328
NM_001040682	Clmn	125	3191	11869	4.00157	21	1	17	3	38	1	20	14	37	73.7272	64.9634	52.1611	2.48781	2.12328	2.6005	2.40386
NM_024191	Arl2bp	264	756	2095	17.4173	6	1	6	0	11	0	5	6	11	114.862	173.5	96.6373	2.21503	2.63199	2.35906	2.40202
NM_009628	Adnp	544	3871	4953	42.2301	77	1	42	9	148	6	76	33	142	258.185	141.115	184.482	2.8341	1.78683	2.61079	2.41057
NM_145400	Ube4a	252	3339	6061	10.3836	33	3	24	5	73	5	30	19	68	109.838	87.5648	95.2116	2.47139	1.96499	2.73538	2.39058
NM_172664	Tlk1	149	2450	4032	24.8919	29	4	30	0	74	2	25	30	72	122.798	185.489	135.249	2.0899	2.50781	2.56942	2.38904
NM_175513	Zfp804a	133	3736	4184	10.5652	32	1	38	3	60	2	31	35	58	97.2449	138.203	69.5795	2.28494	2.61263	2.26957	2.38905
NM_009826	Rb1cc1	450	5217	7046	33.5536	66	5	74	12	187	3	61	62	184	144.629	185.037	166.836	2.14072	2.31984	2.64261	2.36773
NM_001081017	Unc79	695	8486	8870	8.52012	74	6	56	8	143	2	68	48	141	98.6473	87.6518	78.2246	2.43906	2.0886	2.60397	2.37721
NM_008855	Prkcb	220	2242	8830	284.76	81	5	70	4	218	4	76	66	214	424.817	464.382	457.457	2.36857	2.32635	2.45327	2.38273
NM_019933	Ptpn4	187	2968	4707	18.2871	32	1	27	3	84	3	31	24	81	125.988	122.779	125.893	2.31819	2.10301	2.70313	2.37478
NM_010748	Lyst	181	11545	11806	13.6234	122	10	103	16	290	11	112	87	279	111.393	108.918	106.118	2.32319	2.11206	2.68301	2.37275
NM_001114613	Stxbp5l	157	3544	11893	41.9472	62	3	53	5	125	4	59	48	121	196.882	201.622	154.414	2.4472	2.30577	2.35929	2.37075
NM_001003672	Pcdhac2	0	3021	5422	10.8356	28	2	25	3	64	1	26	22	63	97.273	103.606	90.1378	2.26968	2.18134	2.6236	2.35821
NM_025943	Dzip1	678	3237	4900	4.12929	13	0	14	2	38	1	13	12	37	57.4173	66.715	62.4955	2.10761	2.14226	2.83712	2.36233
NM_001290656	Mbd5	194	4691	5301	11.7972	41	4	39	4	103	2	37	35	101	92.9926	110.728	97.0769	2.15201	2.22474	2.66522	2.34732
NM_001252453	Ptprs	236	4742	5641	200.705	164	18	125	13	441	9	146	112	432	366.211	353.622	414.391	2.37141	2.14933	2.57963	2.36679
NM_001122768	Lrrc8d	433	3013	3923	5.58251	19	0	12	1	44	1	19	11	43	83.2345	60.6577	72.0387	2.45624	1.81867	2.81026	2.36172
NM_175466	Zfp770	137	2255	4263	8.57893	15	1	17	0	39	2	14	17	37	74.7088	114.192	75.508	2.03379	2.46596	2.54769	2.34915
NM_011571	Tesk1	1158	3042	3620	8.77205	14	1	13	1	42	1	13	12	41	77.9888	90.6177	94.0633	2.08197	2.11861	2.84757	2.34938
NM_001081055	Trappc10	140	3917	5048	29.8262	44	2	47	1	145	3	42	46	142	125.682	173.27	162.502	2.0112	2.29779	2.69519	2.33473
NM_001081412	Bcr	130	3943	6537	37.4579	70	2	45	5	149	6	68	40	143	201.563	149.247	162.101	2.55132	1.94174	2.51642	2.33649
NM_020283	B3galt1	282	1263	5222	8.98111	11	0	7	0	12	0	11	7	12	126.734	101.518	52.8725	2.76782	2.26793	1.99834	2.3447
NM_018873	Srcin1	137	3791	6965	33.5624	47	5	53	7	144	1	42	46	143	129.912	179.103	169.155	1.98575	2.27265	2.66232	2.30691
NM_001099624	Rapgef2	51	4536	6561	75.2883	100	5	87	10	222	3	95	77	219	239.404	244.254	211.057	2.36645	2.22118	2.3603	2.31598
NM_172280	Emsy	135	3930	4026	7.09913	34	1	20	1	57	0	33	19	57	98.2815	71.2286	64.9203	2.54689	1.90198	2.47533	2.30807
NM_001276467	Asap1	230	3503	6110	33.2153	59	4	29	3	136	1	55	26	135	189.927	113.016	178.281	2.5401	1.61482	2.74612	2.30035
NM_001081298	Adgrl2	0	4464	6052	19.7104	60	3	45	3	101	1	57	42	100	144.318	133.856	96.8263	2.46765	2.18134	2.26676	2.30525
NM_008569	Anapc1	267	6102	8967	18.0243	51	2	69	4	146	2	49	65	144	94.9128	158.484	106.669	1.91855	2.48023	2.4752	2.29133
NM_001168292	R3hdm2	220	3355	4030	33.2922	60	7	40	3	87	1	53	37	86	191.077	167.91	118.571	2.54737	2.18455	2.15594	2.29595
NM_011630	Nr2c2	404	2195	7620	14.9279	20	1	12	0	47	2	19	12	45	119.902	95.3231	108.601	2.37267	1.86323	2.64605	2.29398
NM_001008422	Scaf1	176	3947	4177	19.9649	43	4	38	2	102	2	39	36	100	116.89	135.818	114.62	2.15559	2.19441	2.50028	2.28343
NM_181399	Usp6nl	56	2585	4663	1.92874	8	0	10	1	22	0	8	9	22	35.7529	50.6298	37.6003	1.89642	2.21447	2.68952	2.2668
NM_001252436	Dlg1	433	2938	4513	27.6955	31	3	34	5	81	2	28	29	79	126.334	164.704	136.313	2.06464	2.27043	2.49865	2.27791
NM_001004062	Crtc1	15	1908	5674	22.687	22	2	26	6	52	0	20	20	52	119.412	150.311	118.733	2.1071	2.26173	2.45285	2.27389
NM_019409	Omg	177	1509	2226	31.0731	26	4	13	1	43	0	22	12	43	186.676	128.171	139.534	2.55655	1.83754	2.44386	2.27932
NM_145390	Tnpo2	119	2813	4866	44.4886	50	3	37	5	105	1	47	32	104	197.183	168.992	166.86	2.41291	2.01473	2.42589	2.28451
NM_172752	Sorbs2	349	3940	6040	9.81675	34	5	24	1	69	3	29	23	66	91.2751	91.1224	79.4412	2.23912	2.05712	2.5173	2.27118
NM_183019	Arhgef4	334	1789	2714	51.6328	29	1	27	3	45	1	28	24	44	217.503	234.672	130.709	2.46202	2.39643	1.95908	2.27251
NM_001080932	Foxk2	144	2100	5032	18.6652	23	0	17	1	49	1	23	16	48	132.901	116.376	106.069	2.38256	2.01311	2.4402	2.27862
NM_001289826	Clock	345	2913	9744	14.9016	35	3	18	5	67	0	32	13	67	140.84	72.0213	112.771	2.60595	1.45991	2.70176	2.25588
NM_026872	Ubap2	134	3533	4369	2.65271	12	0	16	1	34	2	12	15	32	39.9025	62.7845	40.6927	1.85712	2.32801	2.55845	2.24786
NM_001286713	Tsc2	119	5546	6335	19.7938	59	3	51	3	149	4	56	48	145	116.627	125.833	115.485	2.15768	2.08956	2.51775	2.255
NM_001081016	Zc3h7b	505	3454	5958	16.944	28	2	29	5	81	1	26	24	80	99.6479	115.784	117.255	2.02713	2.06551	2.65925	2.25063
NM_001136260	Slc4a4	66	3351	7395	10.3023	27	3	26	4	67	1	24	22	66	82.5744	95.2796	86.8412	2.06464	2.09166	2.60866	2.25499
NM_029525	Prex2	328	5125	11054	6.51653	24	2	34	7	103	9	22	27	94	51.8349	80.0768	84.6985	1.67702	2.1238	2.92485	2.24189
NM_175251	Arid2	173	5660	9029	6.67814	49	2	26	4	87	2	47	22	85	96.8127	57.0427	66.9578	2.56309	1.61933	2.56693	2.24978
NM_008678	Ncoa2	222	4611	8267	20.5855	50	1	42	3	116	2	49	39	114	126.183	126.419	112.268	2.24697	2.07203	2.44683	2.25528
NM_011889	Sept3	148	1162	4731	76.0569	22	4	18	1	57	4	18	17	53	200.634	238.519	225.92	2.10527	2.18063	2.45067	2.24553
NM_172803	Dock4	305	6242	8072	57.0439	99	6	101	13	271	4	93	88	267	177.046	210.877	194.384	2.10328	2.18062	2.45499	2.2463
NM_001163542	Plec	6	13776	14972	8.00719	90	7	100	18	254	4	83	82	250	68.1261	84.7213	78.4736	1.94351	2.0779	2.6563	2.2259
NM_153178	Ago2	165	2748	8031	15.644	28	3	22	3	65	4	25	19	61	109.392	104.651	102.076	2.21125	1.96897	2.52062	2.23361
NM_198250	Lrrc4b	80	2210	2726	52.542	35	1	30	6	110	4	34	24	106	180.413	160.304	215.102	2.18147	1.83581	2.66431	2.2272
NM_001267872	Zdbf2	459	7941	12571	7.15709	54	2	43	6	125	2	52	37	123	78.5516	70.3553	71.0567	2.21857	1.87916	2.59938	2.23237
NM_001012625	Rims1	0	3648	3648	12.0503	34	7	27	3	86	1	27	24	85	83.6524	93.5985	100.712	1.98614	1.96917	2.70193	2.21908
NM_009295	Stxbp1	141	1926	3874	145.679	54	2	42	4	110	2	52	38	108	329.257	302.871	261.519	2.41673	2.12376	2.16197	2.23416
NM_133781	Cab39	418	1444	3800	87.9941	25	5	23	3	50	1	20	20	49	220.319	277.329	206.427	2.14986	2.30807	2.20838	2.2221
NM_020009	Mtor	120	7770	8595	10.4852	56	2	56	11	171	1	54	45	170	79.7815	83.6881	96.0517	2.00409	1.89364	2.74056	2.21276
NM_008032	Aff2	461	4280	4486	2.44924	22	1	15	1	27	3	21	14	24	62.1497	52.1544	27.1631	2.5459	2.10969	2.03669	2.23076
NM_173066	Ep400	261	9261	10690	15.0599	90	5	81	8	188	4	85	73	184	106.745	115.397	88.3675	2.19951	2.13349	2.34183	2.22494
NM_019987	Ick	394	2284	6640	1.37284	12	1	4	2	16	0	11	2	16	65.781	15.055	36.5911	2.98695	0.674737	2.91172	2.19114
NM_011857	Tenm3	49	8197	10978	51.8026	182	7	100	20	329	1	175	80	328	242.749	139.686	173.996	2.61841	1.64594	2.36925	2.2112
NM_001077354	C77370	588	5136	10891	17.6542	55	3	41	8	106	0	52	33	106	129.227	103.23	100.74	2.37665	1.87457	2.40865	2.21996
NM_177700	Atmin	34	2491	4877	17.0257	28	0	16	3	73	1	28	13	72	128.802	75.275	126.662	2.39439	1.44135	2.76687	2.20087
NM_001160017	Gnb1	260	1283	3091	139.977	20	4	28	4	87	2	16	24	85	176.772	333.771	359.137	1.54418	2.28858	2.6503	2.16102
NM_001031814	Smg1	347	11324	15553	11.6898	104	10	74	14	242	1	94	60	241	96.7863	77.7643	94.8966	2.21537	1.72055	2.63948	2.1918
NM_001285426	Cacnb4	114	1623	7792	29.7972	24	0	13	1	46	0	24	12	46	179.759	113.137	131.761	2.52809	1.68344	2.3934	2.20164
NM_153588	Mkl2	218	3461	8295	50.5558	58	6	44	7	145	4	52	37	141	181.228	162.318	187.927	2.21187	1.87763	2.4991	2.1962
NM_175114	Trak1	146	2966	4886	31.8859	35	1	37	2	79	1	34	35	78	136.27	176.576	119.554	2.08646	2.28381	2.20104	2.19044
NM_001081049	Kmt2a	0	11892	16439	6.83021	100	5	73	12	144	3	95	61	141	90.2897	72.9773	51.2485	2.44849	1.96083	2.16387	2.19106
NM_001039546	Myo6	221	4010	7868	5.31188	20	5	22	3	66	4	15	19	62	44.7442	71.3414	70.7269	1.59159	2.08342	2.82196	2.16565
NM_001162864	Ttbk1	304	4231	6959	13.0126	33	1	34	3	72	1	32	31	71	92.0998	112.309	78.1474	2.07726	2.18462	2.27688	2.17959
NM_177805	Fam179b	235	5566	6434	27.7249	77	4	58	5	139	3	73	53	136	154.769	141.442	110.268	2.35686	2.05011	2.19192	2.19963
NM_008844	Pip5k1c	96	2082	4288	62.0595	39	3	34	3	71	0	36	31	71	204.877	222.073	154.524	2.26164	2.2032	2.0591	2.17465
NM_177832	Zfp236	37	5437	9473	5.56162	31	0	30	3	68	0	31	27	68	64.884	71.1349	54.4293	2.09925	2.05086	2.40875	2.18629
NM_133907	Ube3c	273	3525	5033	37.6836	37	2	36	3	149	2	35	33	147	121.643	144.37	195.382	1.81901	1.89009	2.7812	2.16344
NM_022565	Ndst4	654	3273	3489	23.4948	31	1	30	2	56	0	30	28	56	129.466	152.102	92.4208	2.20202	2.2572	2.06451	2.17458
NM_001112721	Ubr5	429	8808	9773	23.7609	89	6	81	10	267	6	83	71	261	111.958	120.553	134.637	1.98542	1.91487	2.59864	2.16631
NM_007868	Dmd	247	11284	13852	4.99702	63	2	55	7	140	3	61	48	137	62.4667	61.8732	53.6521	2.11088	1.91574	2.47032	2.16565
NM_001164585	Dnajc6	289	2992	5218	123.576	60	8	64	11	189	4	52	53	185	217.434	278.96	295.831	1.92018	2.10676	2.46637	2.16444
NM_001081376	Chd5	301	6160	9486	49.0019	126	10	75	18	225	2	116	57	223	223.771	138.409	164.512	2.53545	1.66703	2.33113	2.17787
NM_001113517	Arhgef7	147	2496	4929	23.6914	28	0	25	0	50	2	28	25	48	134.724	151.415	88.3234	2.25428	2.24553	1.99268	2.16416
NM_175291	Dock10	105	6669	7308	13.3263	54	6	47	5	161	3	48	42	158	82.6499	91.0318	104.041	1.9063	1.86688	2.67145	2.14821
NM_033524	Spred1	654	1989	6319	27.0326	24	3	13	7	58	3	21	6	55	177.79	63.9415	178.073	2.57261	0.920342	2.90283	2.13193
NM_198010	Ankrd17	138	7197	9313	27.7008	83	7	79	7	209	5	76	72	204	121.686	145.112	124.912	2.01045	2.0876	2.3725	2.15685
NM_177215	Ocrl	197	2900	5184	13.6346	24	1	25	1	44	2	23	24	42	96.1726	126.322	67.1615	2.11073	2.32541	2.02241	2.15285
NM_175022	Prr12	0	6108	6879	4.14613	24	2	32	7	93	4	22	25	89	40.7093	58.2309	62.9808	1.60895	1.94352	2.84515	2.13254
NM_008420	Kcnb1	195	2769	11153	22.02	26	3	29	5	73	3	23	24	70	100.992	132.652	117.546	1.88391	2.09986	2.4613	2.14836
NM_001289685	Iqsec3	744	3432	6575	18.5455	31	5	22	4	74	2	26	18	72	109.324	95.2699	115.777	2.1048	1.72838	2.57148	2.13489
NM_011074	Cdk14	126	1536	4912	56.0796	30	5	19	3	58	1	25	16	57	200.397	161.441	174.732	2.2926	1.80576	2.31433	2.13756
NM_001291186	Abr	165	2091	4463	198.462	51	2	50	5	156	4	49	45	152	287.547	332.406	341.118	2.02951	2.06701	2.30755	2.13469
NM_134112	Kctd1	122	920	1772	17.7766	10	0	6	0	14	0	10	6	14	141.634	106.97	75.8303	2.50463	1.92165	1.99355	2.13994
NM_025757	Gid4	511	1165	4400	7.79859	4	0	4	0	9	0	4	4	9	69.1277	87.0152	59.4815	1.98094	2.13274	2.27684	2.13017
NM_001252060	Cacna1a	281	7265	7778	20.7587	70	6	64	4	178	2	64	60	176	103.573	122.225	108.925	1.9569	2.01818	2.39677	2.12395
NM_001083967	Tcf4	239	2240	7135	73.6813	38	3	35	7	100	4	35	28	96	197.693	199.078	207.368	2.10365	1.93946	2.35146	2.13152
NM_199149	Ppp1r37	368	2507	2971	30.9888	27	0	22	1	63	2	27	21	61	142.667	139.676	123.264	2.17035	1.96323	2.26708	2.13355
NM_001099298	Scn2a1	51	6072	8690	132.728	168	12	134	17	334	11	156	117	323	292.837	276.458	231.874	2.30537	2.04963	2.05999	2.13833
NM_001081982	Nfix	314	1640	5626	25.2522	17	2	11	3	50	0	15	8	50	127.855	85.8339	162.984	2.1392	1.38722	2.82748	2.11797
NM_007379	Abca2	96	7398	8061	23.8049	86	3	64	8	204	3	83	56	201	128.471	109.109	118.979	2.18276	1.76983	2.41885	2.12381
NM_027727	Dym	264	2274	2471	14.3805	20	1	17	2	34	0	19	15	34	106.838	106.171	73.1139	2.22942	2.0418	2.10396	2.12506
NM_011682	Utrn	89	10382	12382	1.50416	27	2	30	2	77	2	25	28	75	27.4516	38.7016	31.4946	1.66949	1.98045	2.62508	2.09168
NM_001304266	Srcap	638	10454	10904	13.8063	82	11	72	11	240	5	71	61	235	81.7511	88.4113	103.479	1.86857	1.80288	2.63641	2.10262
NM_177034	Apba1	287	2816	6632	40.952	38	1	28	3	89	0	37	25	89	165.357	140.638	152.11	2.21034	1.80094	2.35606	2.12245
NM_026856	Zfp644	316	4195	5690	24.0444	43	2	42	4	92	2	41	38	90	119.463	139.372	100.286	2.07167	2.11682	2.16457	2.11769
NM_001256382	Rims2	77	4796	7404	10.7892	37	3	24	0	101	3	34	24	98	81.4326	72.3559	89.7622	2.01591	1.66607	2.62088	2.10095
NM_177047	Auts2	520	4305	6059	8.05639	22	0	22	0	58	0	22	22	58	65.6941	82.6931	66.2338	1.88726	2.03916	2.40695	2.11112
NM_007459	Ap2a2	180	2997	4639	120.205	65	4	56	5	166	5	61	51	161	244.744	257.57	247.034	2.10803	2.00876	2.22758	2.11479
NM_007841	Ddx6	306	1758	6008	49.2073	24	4	17	2	64	0	20	15	64	155.68	146.973	190.516	2.00942	1.75106	2.53963	2.10004
NM_001081963	9430020K01Rik	159	4122	6731	20.3474	48	0	27	3	103	0	48	24	103	136.895	86.1588	112.339	2.37174	1.52608	2.45669	2.11817
NM_176832	Spire1	131	1679	4761	17.5074	17	1	12	2	36	1	16	10	35	116.82	91.9055	97.727	2.23622	1.71209	2.37127	2.10653
NM_001083587	Tns3	318	4641	7483	2.9592	12	0	14	0	60	2	12	14	58	31.3737	46.0739	57.9909	1.44237	1.81401	2.98542	2.0806
NM_198862	Nlgn2	411	2922	5002	47.8621	41	2	31	9	114	2	39	22	112	175.545	124.649	192.792	2.19987	1.5305	2.57808	2.10282
NM_008774	Pabpc1	467	2378	2820	20.1207	13	2	21	1	53	1	11	20	52	65.0581	148.896	117.614	1.30542	2.32223	2.53151	2.05305
NM_146150	Nrd1	28	3514	4155	26.93	44	8	38	6	103	4	36	32	99	116.72	130.598	122.751	1.96784	1.953	2.36902	2.09662
NM_009125	Atxn2	27	3888	4472	15.0886	37	0	26	0	73	0	37	26	73	108.311	95.8046	81.7223	2.21934	1.86388	2.22758	2.1036
NM_175021	Samd4b	260	2324	4391	7.07128	19	1	11	3	26	0	18	8	26	98.5672	55.1433	54.4479	2.55351	1.53514	2.22456	2.1044
NM_007708	Cit	715	6883	6898	13.245	65	3	46	6	100	2	62	40	98	113.61	92.2631	68.6751	2.3691	1.89004	2.07685	2.112
NM_001285860	Sgip1	421	2341	4944	32.269	28	2	17	5	75	0	26	12	75	153.053	88.9186	168.841	2.24662	1.2867	2.68986	2.07439
NM_023662	Pcm1	224	6302	8381	23.2608	68	1	49	12	197	6	67	37	191	124.59	86.6071	135.828	2.15285	1.4509	2.62771	2.07715
NM_001170745	Magi2	567	3864	6530	16.2899	36	6	22	3	85	1	30	19	84	102.842	81.9874	110.123	2.09708	1.59187	2.59898	2.09597
NM_026799	Drosha	276	4398	4567	25.0245	45	7	57	11	99	4	38	46	95	104.195	158.768	99.6169	1.8496	2.28012	2.12418	2.08463
NM_010193	Fem1b	343	2227	6496	57.5056	35	1	24	1	67	1	34	23	66	203.971	173.684	151.419	2.30252	1.8957	2.08842	2.09555
NM_199306	Wdtc1	419	2453	4175	13.2492	17	3	15	1	42	0	14	14	42	77.7941	97.9241	89.2515	1.82254	1.97575	2.4547	2.08433
NM_198292	Tex2	98	3485	4942	26.072	38	1	34	4	90	1	37	30	89	123.468	126.014	113.577	2.06902	1.92145	2.28186	2.09078
NM_018733	Scn1a	187	6184	8287	28.2943	83	7	64	12	158	3	76	52	155	143.235	123.362	111.716	2.23252	1.84024	2.19511	2.08929
NM_001001152	Zfp458	32	2291	3488	3.06973	12	1	12	3	16	1	11	9	15	55.0359	56.6812	28.7007	2.23044	2.09028	1.94248	2.08773
NM_031174	Dscam	459	6501	7481	10.888	58	4	32	5	114	2	54	27	112	101.014	63.5764	80.1225	2.32113	1.47382	2.44997	2.08164
NM_009872	Cdk5r2	69	1179	2704	23.9091	14	0	11	1	22	0	14	10	22	142.552	128.171	85.6677	2.33009	1.99943	1.94161	2.09038
NM_177608	Secisbp2l	248	3518	6797	50.2393	47	5	41	10	164	2	42	31	162	145.168	134.873	214.134	1.89569	1.61429	2.69227	2.06742
NM_175749	Nup153	376	4765	6021	11.5743	33	1	31	7	87	0	32	24	87	82.4051	77.7962	85.6783	1.98946	1.72727	2.49969	2.07214
NM_198033	Setx	683	8624	10970	27.355	102	13	77	6	219	9	89	71	210	126.673	127.203	114.304	2.07619	1.90532	2.25412	2.07854
NM_001302958	Ttll7	397	2227	2265	78.9677	29	4	34	2	84	0	25	32	84	154.404	248.778	198.402	1.70412	2.21818	2.2344	2.05224
NM_028627	Psd	213	3288	3900	87.978	49	1	64	4	134	3	48	60	131	176.427	277.6	184.138	1.82945	2.30959	2.04368	2.06091
NM_138682	Lrrc4	133	2092	3622	24.1167	28	2	13	2	57	0	26	11	57	150.006	79.886	125.764	2.39826	1.31204	2.48886	2.06639
NM_001044741	Cacnb3	151	1603	2568	37.593	15	1	18	2	54	1	14	16	53	108.976	156.771	157.771	1.66186	2.01047	2.47459	2.04897
NM_001033268	Fam120a	0	3339	4919	25.761	44	3	31	8	96	2	41	23	94	138.783	97.9995	121.683	2.24515	1.56613	2.39054	2.06727
NM_001081251	Pbrm1	311	5426	8117	11.8189	41	2	36	1	81	1	39	35	80	86.1764	97.3498	67.6023	2.04105	2.03783	2.14174	2.07354
NM_133195	Celf4	356	1811	3947	64.99	22	0	24	2	57	3	22	22	54	170.895	215.116	160.416	1.97137	2.12878	2.07761	2.05925
NM_080558	Ssfa2	115	3874	5095	1.46986	6	0	11	1	36	1	6	10	35	18.0405	37.8478	40.2451	1.07816	1.96252	2.99653	2.0124
NM_001080925	Rapgefl1	369	2358	4163	47.967	31	3	25	1	68	2	28	24	66	159.108	171.668	143.426	2.05668	1.9909	2.14966	2.06574
NM_001081344	Stxbp5	357	3708	9074	27.6774	50	2	22	4	108	0	48	18	108	161.896	76.4206	139.305	2.42288	1.16299	2.53048	2.03878
NM_177327	Wwp1	283	3040	6458	5.99168	14	0	12	1	42	1	14	11	41	57.3933	56.7634	64.2783	1.87606	1.67925	2.59142	2.04891
NM_001003908	Cltc	203	5231	6144	249.423	175	16	131	19	412	14	159	112	398	357.414	316.91	342.141	2.20152	1.85695	2.13611	2.06486
NM_001139509	Nr4a2	299	2096	3026	23.3982	36	3	11	1	37	0	33	10	37	207.556	79.1707	88.9961	2.8855	1.31775	2.01321	2.07215
NM_001205239	Parp6	557	2450	2714	23.205	22	3	18	1	42	0	19	17	42	113.442	127.765	95.8994	2.0191	2.01332	2.12737	2.05326
NM_182993	Slc17a7	162	1845	2940	337.832	54	4	59	7	154	4	50	52	150	335.781	439.574	385.234	1.92323	2.14157	2.07394	2.04625
NM_008957	Ptch1	0	4305	4305	2.09427	12	1	11	0	45	1	11	11	44	28.8795	36.3523	44.1771	1.53733	1.68566	2.85875	2.02725
NM_144788	Hectd1	356	8189	8988	43.855	116	14	96	14	282	6	102	82	276	147.178	148.936	152.299	1.99983	1.84133	2.30519	2.04878
NM_177644	Rasal2	657	4518	10046	19.6909	43	2	30	4	88	1	41	26	87	120.02	95.8046	97.395	2.20229	1.69943	2.27597	2.05923
NM_001014973	Snx13	208	3085	6226	20.8455	23	4	40	3	57	2	19	37	55	74.642	182.968	82.6305	1.48173	2.59766	1.99498	2.02479
NM_001134459	Prickle2	286	2824	7878	69.4509	41	1	39	7	116	0	40	32	116	178.13	179.379	197.553	1.99001	1.82566	2.32697	2.04755
NM_019763	Spen	351	11283	12299	6.8805	72	5	56	9	154	3	67	47	151	69.2699	61.1661	59.7028	2.0616	1.70158	2.37852	2.04723
NM_019798	Pde4a	408	2241	4145	16.125	17	0	13	1	36	0	17	12	36	104.823	93.139	84.8902	2.13091	1.78213	2.23136	2.04813
NM_139149	Fus	86	1643	1845	9.7939	10	1	9	1	30	0	9	8	30	65.3316	73.0994	83.2818	1.75813	1.74061	2.5872	2.02865
NM_001033258	Arfgef3	133	6646	8216	41.401	81	7	70	7	262	7	74	63	255	128.416	137.617	169.23	1.83882	1.76287	2.50154	2.03441
NM_001110275	Itsn1	261	3903	5364	15.4306	32	3	30	3	70	3	29	27	67	89.9969	105.472	79.5156	1.93821	1.98873	2.17085	2.0326
NM_176850	Bptf	0	8766	11488	17.9957	97	8	62	7	196	7	89	55	189	114.751	89.2635	93.1918	2.19338	1.65302	2.28156	2.04265
NM_001161362	Ppp2r3a	611	4064	6918	6.61527	22	5	15	4	75	4	17	11	71	55.6445	45.322	88.8749	1.77	1.29334	2.98273	2.01536
NM_001044308	Cacna1i	561	7161	9794	13.2246	47	4	47	3	130	2	43	44	128	73.6367	94.8465	83.8269	1.74446	1.93083	2.36566	2.01365
NM_028940	Clvs1	325	1390	3604	16.1595	9	0	9	1	19	0	9	8	19	95.513	106.869	77.1119	1.9954	1.9792	2.09107	2.02189
NM_001170669	Pde8b	237	2604	4619	17.65	27	0	15	1	46	0	27	14	46	128.924	84.1477	83.9995	2.37342	1.57985	2.14665	2.03331
NM_172924	Peak1	452	5660	10982	5.164	22	1	29	2	56	1	21	27	55	45.5741	73.7574	45.6467	1.63562	2.14891	2.21192	1.99882
NM_177184	Vps13c	31	11278	11523	20.08	95	13	102	12	289	8	82	90	281	82.4037	113.846	107.991	1.64766	1.93626	2.40991	1.99794
NM_173440	Nrip1	723	4209	4529	19.9589	30	1	27	0	81	1	29	27	80	94.0243	110.192	99.1928	1.84173	1.89293	2.29196	2.00888
NM_033218	Srebf2	134	3527	4570	37.5084	40	4	36	3	117	1	36	33	116	119.919	138.37	147.772	1.80131	1.83174	2.38186	2.00497
NM_018878	Paxip1	271	3442	5850	5.68947	17	4	15	1	43	0	13	14	43	46.3358	62.8123	58.6124	1.59942	1.85731	2.4981	1.98494
NM_009231	Sos1	530	4490	8919	9.19535	34	3	22	4	59	3	31	18	56	88.4782	64.6681	61.1238	2.23479	1.60276	2.18943	2.00899
NM_007988	Fasn	527	8042	9938	50.7467	115	3	69	5	321	9	112	64	312	168.445	121.161	179.45	2.10401	1.45341	2.42961	1.99567
NM_001289682	Arhgap33	140	4058	4420	11.6408	28	1	23	2	74	2	27	21	72	77.8877	76.2549	79.4302	1.90457	1.69486	2.38603	1.99515
NM_027088	Bap1	129	2316	3406	40.2702	26	2	26	4	76	0	24	22	76	124.032	143.115	150.204	1.80588	1.83649	2.35078	1.99772
NM_133648	Slc12a6	0	3300	5956	21.0772	41	3	25	2	66	1	38	23	65	130.149	99.1577	85.1367	2.27697	1.70703	2.02958	2.00453
NM_001081028	Sipa1l3	616	5947	7713	18.7786	38	8	46	1	141	4	30	45	137	63.6037	120.093	111.078	1.31563	2.05472	2.50211	1.95748
NM_001081293	Rprd2	202	4612	8419	8.98441	31	3	26	3	65	2	28	23	63	71.7611	74.1997	61.7475	1.94706	1.81545	2.22193	1.99481
NM_001291150	Ptprt	248	4586	12114	20.5201	44	6	25	0	124	0	38	25	124	99.0065	81.9904	123.552	1.89902	1.44931	2.58745	1.97859
NM_011286	Rph3a	435	2481	4150	59.8599	23	1	29	4	99	2	22	25	97	121.531	173.839	204.92	1.53059	1.87221	2.49408	1.96562
NM_001290818	Adrbk1	208	2278	3379	55.1093	26	1	31	1	69	1	25	30	68	136.502	206.188	141.989	1.74949	2.16949	2.02839	1.98246
NM_022022	Ube4b	726	4248	5508	17.4786	29	1	25	4	86	0	28	21	86	89.8542	84.8287	105.542	1.85861	1.59751	2.48353	1.97988
NM_001004177	Celsr2	0	8754	10401	58.7697	111	9	117	14	394	5	102	103	389	131.693	167.395	192.07	1.65785	1.82907	2.41479	1.96724
NM_028096	2010300C02Rik	252	3780	4361	140.823	88	5	62	11	226	1	83	51	225	265.9	205.662	275.658	2.12944	1.58627	2.26401	1.99324
NM_001204229	Clec16a	224	3329	6238	16.8034	41	3	19	4	57	0	38	15	57	138.322	68.7294	79.347	2.50542	1.31822	2.10225	1.9753
NM_001163480	Neurl1a	220	1894	3680	22.3981	23	0	11	1	34	0	23	10	34	155.289	84.9879	87.7891	2.49406	1.44702	2.0271	1.9894
NM_001145836	Ralgds	87	2775	3590	18.6967	27	0	21	0	44	0	27	21	44	113.528	111.148	70.7523	2.15421	1.94576	1.85475	1.9849
NM_011159	Prkdc	23	12410	12674	2.07496	33	3	34	3	117	2	30	31	115	27.3731	35.6048	40.1281	1.46579	1.66141	2.72719	1.95146
NM_001163574	Tjp1	408	5466	6874	14.7159	39	8	32	5	137	3	31	27	134	69.2712	75.9447	114.51	1.59001	1.54418	2.73348	1.95589
NM_001163643	Map3k12	427	3094	5528	26.6064	26	0	22	3	80	1	26	19	79	110.184	101.355	128.033	1.89221	1.59475	2.4391	1.97535
NM_023543	Chn2	86	1085	2653	2.57615	5	0	2	0	8	0	5	2	8	56.5684	28.4824	34.6132	2.37881	1.20576	2.34752	1.97736
NM_001042491	Anapc5	192	2376	2724	45.8714	24	0	31	3	68	2	24	28	66	124.202	182.397	130.62	1.72707	2.10595	2.04908	1.9607
NM_139294	Braf	168	2583	9728	27.0282	27	6	25	1	58	1	21	24	57	98.2815	141.386	102.018	1.71752	2.06526	2.0993	1.9607
NM_011083	Pik3c2a	216	5277	8042	6.47796	24	5	23	2	87	2	19	21	85	42.4314	59.0331	72.5939	1.3919	1.68761	2.70693	1.92881
NM_001004164	Gnptab	7	3715	5204	14.299	35	6	24	4	76	1	29	20	75	88.395	76.7367	87.4257	1.95955	1.5769	2.36624	1.96756
NM_175407	Sobp	459	3054	4980	18.2251	23	0	21	2	49	1	23	19	48	100.175	104.167	79.9505	1.98953	1.86794	2.05072	1.9694
NM_001080814	Fat3	6	13662	18468	27.6393	187	8	113	7	301	9	179	106	292	148.149	110.432	92.4223	2.29571	1.69497	1.93961	1.97676
NM_001282994	Cobl	90	4083	5449	11.8483	39	2	25	4	58	3	37	21	55	104.73	74.8226	59.5361	2.32082	1.65659	1.95653	1.97798
NM_001177720	Madd	84	4968	5905	57.3162	61	3	55	9	245	1	58	46	244	134.221	133.997	215.939	1.70082	1.52348	2.60304	1.94245
NM_001114399	Zmym4	69	4719	7010	12.748	37	4	32	2	74	2	33	30	72	80.2104	91.7869	66.9263	1.8906	1.9062	2.06905	1.95528
NM_019967	Brinp1	434	2717	3354	121.875	47	0	45	1	100	4	47	44	96	232.681	274.195	181.753	2.02655	2.09047	1.77424	1.96375
NM_008173	Nr3c1	13	2392	6329	27.4543	23	1	23	4	67	1	22	19	66	104.52	113.624	119.913	1.7966	1.74023	2.32045	1.95243
NM_053170	Trim33	586	4009	8870	15.5423	33	3	25	1	54	1	30	24	53	99.0567	99.7509	66.9247	2.07211	1.90381	1.9166	1.96418
NM_144796	Susd4	135	1608	2035	23.1729	13	1	15	0	28	0	12	15	28	92.0764	144.878	82.1623	1.71891	2.19552	1.90538	1.93994
NM_001198787	Aatk	138	4092	5183	57.2207	56	1	46	3	152	3	55	43	149	157.216	154.719	162.88	1.92998	1.73196	2.1975	1.95315
NM_001290313	Wnk2	569	7019	7197	9.30337	43	0	32	4	103	1	43	28	102	75.3491	61.7605	68.353	1.99581	1.52918	2.34172	1.95557
NM_019439	Gabbr1	324	3207	4486	178.244	68	7	67	10	197	8	61	57	189	239.141	281.283	283.357	1.83023	1.89245	2.12253	1.94841
NM_001110253	Fyco1	214	4528	7702	2.36834	17	1	11	0	31	0	16	11	31	41.9189	36.2765	31.0598	1.99859	1.60668	2.25593	1.95373
NM_001012765	Adcy5	463	4252	5060	19.1059	34	5	34	3	73	0	29	31	73	86.5054	116.399	83.2752	1.74859	1.99898	2.0732	1.94026
NM_026137	Wdr13	531	1989	4233	60.5361	20	0	21	2	53	3	20	19	50	155.039	185.4	148.228	1.87493	1.95815	2.0182	1.95043
NM_173444	Nbeal1	328	8395	12108	1.77128	26	1	25	6	51	2	25	19	49	35.0266	33.5084	26.2544	1.91965	1.67161	2.23682	1.94269
NM_007938	Epha6	283	3676	4213	85.7809	70	2	46	4	142	5	68	42	137	226.514	176.108	174.524	2.20567	1.66866	1.98576	1.95336
NM_138667	Tab2	409	2491	4278	5.99067	10	5	9	1	45	0	5	8	45	27.1431	54.6666	93.422	0.79587	1.62505	3.13098	1.85063
NM_001099288	Arhgap44	323	2750	4022	43.4597	37	2	23	2	74	0	35	21	74	162.993	123.101	131.789	2.1527	1.57208	2.10347	1.94275
NM_183300	Zfyve9	49	2170	2170	33.9396	19	3	24	2	69	1	16	22	68	85.2607	147.569	138.575	1.37123	1.98635	2.36605	1.90788
NM_001033222	Pdzd8	193	3637	7076	19.5285	36	2	30	10	76	2	34	20	74	111.58	82.6189	92.8722	2.10223	1.49093	2.21374	1.93563
NM_008881	Plxna1	280	5965	9028	35.8087	75	2	50	4	159	3	73	46	156	145.132	115.117	118.607	2.10538	1.59495	2.10035	1.93356
NM_181517	Ipo7	0	3117	3117	65.9964	58	6	42	7	116	3	52	35	113	188.554	159.751	156.696	2.1037	1.69	2.03194	1.94188
NM_027629	Pgm2l1	317	2183	8626	125.792	33	2	41	3	92	5	31	38	87	187.767	289.724	201.523	1.69752	2.1504	1.89888	1.9156
NM_172910	Dlgap2	351	3531	4510	20.4434	33	1	20	2	74	1	32	18	73	113.735	80.5301	99.2232	2.10142	1.4257	2.27396	1.93369
NM_001144953	Vwa5b2	488	4235	4527	2.38333	9	0	12	1	32	0	9	11	32	27.1474	41.7659	36.9134	1.36789	1.80607	2.50017	1.89138
NM_001267796	Igip	1082	1244	1378	36.5618	3	0	1	0	4	0	3	1	4	209.303	87.8208	106.724	2.6207	1.19163	1.93203	1.91479
NM_029709	Clasp1	748	5131	7599	18.8475	39	3	30	2	99	3	36	28	96	92.8326	90.8865	94.671	1.85887	1.65044	2.26871	1.92601
NM_001039079	Prkcz	555	1785	4111	59.6617	15	2	18	1	48	2	13	17	46	119.456	196.633	161.648	1.5078	2.05201	2.15443	1.90475
NM_028487	Gpbp1	1329	2811	3624	42.3425	22	2	18	3	39	0	20	15	39	152.529	143.998	113.745	2.07313	1.81436	1.91107	1.93285
NM_172809	Sacs	775	3082	3343	11.4804	18	0	18	6	34	1	18	12	33	88.185	74.0025	61.8278	2.09231	1.66018	2.03528	1.92926
NM_001113389	Dyrk1a	146	2438	5756	31.3756	23	2	24	0	57	2	21	24	55	103.556	148.974	103.721	1.70041	2.04854	2.00849	1.91915
NM_172151	Zdhhc8	126	2415	4868	7.43781	15	1	8	1	37	1	14	7	36	69.1277	43.5076	67.9789	2.01032	1.162	2.50591	1.89274
NM_007619	Cbl	158	2900	5083	12.0077	20	2	16	1	49	3	18	15	46	74.195	77.8281	72.5116	1.81525	1.70516	2.2307	1.91704
NM_054081	Mta1	140	2237	2775	10.4891	19	2	10	1	31	1	17	9	30	91.6263	61.06	61.8358	2.20356	1.43861	2.10491	1.91569
NM_008817	Peg3	362	5078	6624	63.8072	90	8	62	8	152	5	82	54	147	196.521	162.904	134.729	2.18434	1.73903	1.83997	1.92111
NM_177261	Kndc1	491	5720	7302	17.4028	40	2	34	2	122	6	38	32	116	82.1362	87.0651	95.8863	1.73173	1.63773	2.34844	1.90597
NM_153459	Dusp7	166	1435	3213	15.6483	18	3	3	1	42	1	15	2	41	133.598	22.4223	139.65	2.49947	-0.253775	2.97258	1.73942
NM_173776	Maml2	278	1523	4452	1.62524	5	0	2	0	7	0	5	2	7	45.3911	22.8546	24.3022	2.34699	1.17272	2.19153	1.90374
NM_175481	Grik4	200	3071	3488	7.75678	12	1	15	0	43	0	11	15	43	43.3041	74.3311	64.737	1.30951	1.90876	2.40312	1.8738
NM_178060	Thra	518	1751	2336	172.621	26	4	29	5	89	6	22	24	83	201.664	276.924	290.959	1.60421	1.88973	2.18538	1.8931
NM_011029	Rpsa	98	986	1861	87.8157	19	0	12	2	35	0	19	10	35	241.83	160.214	170.362	2.28552	1.51772	1.93291	1.91205
NM_001164493	Klhl29	734	3362	7048	4.49727	13	0	11	3	26	0	13	8	26	55.9098	43.3089	42.7627	2.01626	1.46618	2.22407	1.90217
NM_001093776	Myt1l	818	4376	7104	53.0166	56	5	37	2	122	5	51	35	117	162.007	139.951	142.134	2.02064	1.63436	2.05963	1.90488
NM_026147	Rps20	169	529	3446	8.45964	1	0	2	0	8	1	1	2	7	31.3955	79.0388	84.0452	0.791756	1.94378	2.71299	1.81618
NM_001024955	Pik3r1	342	1707	5826	27.2369	13	0	12	0	30	0	13	12	30	107.642	125.072	94.9961	1.844	1.88363	1.99051	1.90605
NM_148948	Dicer1	279	6000	9851	5.79611	24	1	28	2	64	0	23	26	64	45.4387	64.6568	48.3532	1.55969	1.88759	2.20622	1.8845
NM_011393	Slc1a2	38	1715	2127	107.057	18	5	37	4	113	4	13	33	109	87.6153	279.958	280.938	0.697873	2.20055	2.5022	1.80021
NM_001168505	Shoc2	324	2073	4075	20.7941	21	5	13	2	40	2	16	11	38	103.395	89.4778	93.9098	1.95337	1.5672	2.18148	1.90068
NM_145514	Wdr26	541	2467	7047	23.8618	19	4	19	1	40	1	15	18	39	88.0247	132.962	87.5237	1.63581	2.05361	1.97405	1.88782
NM_133821	Phlpp1	135	5199	6104	23.1011	37	3	46	9	142	3	34	37	139	75.8848	103.949	118.642	1.44181	1.71848	2.43784	1.86604
NM_170599	Igsf11	163	1450	3414	8.30595	11	0	3	0	20	0	11	3	20	96.6015	33.1631	67.169	2.42462	0.702122	2.40372	1.84349
NM_177192	Dennd5b	371	4196	9833	22.0341	31	2	30	4	97	1	29	26	96	85.6912	96.7063	108.482	1.64648	1.64349	2.34504	1.87834
NM_010137	Epas1	419	3044	5352	2.86612	5	0	13	2	25	3	5	11	22	21.5283	59.6178	36.2252	0.91888	2.20555	2.33117	1.81853
NM_011931	Rfwd2	112	2314	5056	13.5665	15	2	13	0	43	2	13	13	41	66.7261	83.9921	80.4792	1.58645	1.73972	2.28724	1.87114
NM_009428	Trpc5	403	3331	8502	8.48935	21	1	13	2	41	1	20	11	40	77.202	53.4483	59.0481	2.08766	1.3772	2.20102	1.88863
NM_001033322	Gucy1a2	454	2647	13727	20.8076	19	1	13	2	64	2	18	11	62	92.7691	71.3619	122.2	1.79651	1.24042	2.56087	1.86593
NM_001098172	Pcdh10	855	3999	4234	30.1772	38	2	28	3	73	2	36	25	71	129.416	113.128	97.6097	2.04619	1.6755	1.95083	1.89084
NM_001122952	Nfia	34	1633	9274	4.08415	5	0	4	0	23	0	5	4	23	35.342	35.5897	62.1723	1.41432	1.24249	2.83809	1.83164
NM_027901	Gtf3c2	284	3008	4551	7.20543	11	1	14	1	40	0	10	13	40	41.4918	67.8967	63.4703	1.29358	1.82369	2.43131	1.84953
NM_021921	Mapk8ip2	310	2803	3539	32.6831	23	1	22	3	82	1	22	19	81	99.7401	108.429	140.437	1.62092	1.56501	2.41431	1.86675
NM_001081426	Dip2c	457	5128	8026	41.1176	54	6	42	2	164	4	48	40	160	116.145	121.832	148.056	1.69819	1.59135	2.31399	1.86784
NM_011858	Tenm4	279	8670	13172	22.7573	84	6	62	14	211	2	78	48	209	105.063	81.3842	107.659	1.92049	1.37469	2.30922	1.86813
NM_001033213	Ttc7b	131	2663	3442	38.5606	38	3	18	2	87	6	35	16	81	156.233	89.9019	138.273	2.16579	1.19254	2.26474	1.87435
NM_016716	Cul3	379	2686	4919	45.2276	27	2	24	2	79	2	25	22	77	122.479	135.671	144.265	1.71569	1.68772	2.2033	1.8689
NM_008139	Gnaq	495	1575	5634	53.4549	12	0	14	1	35	0	12	13	35	125.582	171.251	140.075	1.6481	1.92047	2.03225	1.86694
NM_133360	Acaca	26	7064	9032	19.0029	58	4	59	6	130	2	54	53	128	86.719	107.137	78.61	1.7555	1.88269	1.99419	1.87746
NM_024226	Rtn4	286	886	3271	110.599	6	0	13	3	39	0	6	10	39	113.024	237.116	280.951	1.04505	1.94083	2.47724	1.82104
NM_008712	Nos1	378	4668	9695	12.3967	37	1	21	3	70	1	36	18	69	94.8451	59.6936	69.5199	2.14972	1.30275	2.14539	1.86595
NM_026003	Smarca2	300	1011	1962	48.1706	9	0	8	2	26	1	9	6	25	143.068	120.059	151.98	1.90075	1.4724	2.22998	1.86771
NM_027144	Arhgef12	508	5143	10483	36.9711	52	7	45	10	162	3	45	35	159	109.732	107.431	148.274	1.68218	1.47553	2.39785	1.85185
NM_010657	Hivep3	914	7961	9021	4.63622	35	1	21	3	81	1	34	18	80	54.5311	36.3397	49.0685	1.96137	1.19426	2.39912	1.85158
NM_172381	AI314180	228	5751	5902	27.3929	63	6	45	12	154	5	57	33	149	116.646	85.0064	116.608	1.95635	1.32298	2.28185	1.85373
NM_008851	Pitpnm1	563	4295	4512	30.6387	33	1	34	8	121	2	32	26	119	96.9121	99.1161	137.823	1.6195	1.47536	2.43688	1.84391
NM_001085355	Arid1b	21	6756	11325	30.5991	70	7	60	5	179	7	63	55	172	105.724	116.182	110.385	1.74585	1.70535	2.1176	1.85627
NM_001291077	Snph	292	1672	4543	62.4268	29	4	15	4	51	1	25	11	50	204.753	113.403	156.606	2.25711	1.22998	2.07387	1.85365
NM_130893	Scrt1	424	1471	4010	4.63815	4	0	5	0	9	1	4	5	8	43.18	67.9416	33.0264	1.62439	2.09676	1.82762	1.84959
NM_183225	Usp24	259	8113	10601	10.1612	54	8	46	10	131	8	46	36	123	66.1967	65.2115	67.6911	1.75426	1.55313	2.25985	1.85575
NM_001290814	Aff3	103	3793	7251	14.7244	38	1	22	6	62	2	37	16	60	113.33	61.6888	70.2817	2.29985	1.24388	2.02879	1.85751
NM_001033962	Ube3a	563	3113	4910	48.6597	36	3	29	1	69	2	33	28	67	146.266	156.218	113.567	1.92637	1.84598	1.80187	1.85807
NM_001114096	Smarcc2	91	3484	4686	40.6483	49	3	35	3	81	3	46	32	78	153.23	134.177	99.3638	2.10508	1.73768	1.74746	1.86341
NM_010307	Gnal	266	1412	5489	13.0931	13	1	4	0	19	1	12	4	18	118.349	49.6579	67.8899	2.43522	1.00343	2.06913	1.83593
NM_026164	Pnpla8	237	2568	4406	45.3274	45	2	18	2	65	4	43	16	61	208.495	97.6541	113.111	2.4818	1.21199	1.85062	1.84814
NM_010408	Hcn1	384	3117	7911	24.8692	27	2	19	0	63	1	25	19	62	103.388	98.9069	98.0549	1.84225	1.60119	2.10617	1.84987
NM_008748	Dusp8	454	2446	4819	22.8411	22	2	12	2	49	0	20	10	49	113.478	71.4206	106.322	2.02936	1.18401	2.28837	1.83391
NM_201616	Gnas	226	1411	1767	361.791	33	2	38	7	104	3	31	31	101	295.674	372.183	368.401	1.69721	1.85915	1.95679	1.83772
NM_026376	Plxnd1	200	5978	6907	6.9225	34	0	21	2	71	0	34	19	71	66.5076	46.7831	53.1127	1.99912	1.31107	2.20509	1.83843
NM_011385	Ski	15	2199	5465	25.104	15	0	17	1	59	0	15	16	59	77.6262	104.227	116.766	1.42296	1.67097	2.3509	1.81494
NM_019945	Mast1	76	4789	4922	20.144	41	1	33	3	92	0	40	30	92	95.9251	90.56	84.3738	1.86488	1.60416	2.05142	1.84015
NM_001099637	Cep170	166	4903	6930	22.0237	39	1	37	3	101	5	38	34	96	90.6671	102.115	87.5962	1.72821	1.72229	2.03689	1.82913
NM_001037709	Rusc2	286	4858	5301	36.2253	42	4	44	5	147	1	38	39	146	93.9392	121.359	138.027	1.47064	1.66398	2.31021	1.81494
NM_013720	Mga	186	9315	13931	11.2811	57	6	58	9	144	6	51	49	138	63.1417	76.3634	65.3391	1.62124	1.71631	2.12843	1.82199
NM_001081300	Tshz1	1159	4414	5814	1.58214	8	0	8	3	24	0	8	5	24	27.7785	21.854	31.8697	1.65522	1.12474	2.60329	1.79442
NM_177324	Sbf2	159	5778	7163	6.91109	29	3	23	6	89	2	26	17	87	52.2979	43.043	66.9233	1.65337	1.19189	2.53982	1.79503
NM_001114125	Dab2ip	115	3514	5388	19.6067	20	0	27	5	84	0	20	22	84	66.5041	92.084	106.818	1.35319	1.64493	2.4125	1.80354
NM_016759	Rundc3a	273	1614	2430	71.312	19	3	19	1	50	1	16	18	49	134.853	190.966	157.937	1.57206	1.89964	1.98375	1.81848
NM_001081379	Ankrd11	458	8390	8719	25.4965	74	9	69	4	170	3	65	65	167	92.619	116.585	91.002	1.66811	1.82304	1.97932	1.82349
NM_019827	Gsk3b	1525	2788	8298	39.494	18	0	10	1	34	1	18	9	33	161.079	101.38	112.935	2.19502	1.35111	1.95431	1.83348
NM_024225	Snx5	145	1360	2419	19.9772	10	2	12	2	23	1	8	10	22	74.4189	117.094	78.2643	1.5038	1.98002	1.94938	1.81107
NM_011056	Pde4d	180	2424	7049	13.2392	20	1	13	1	29	0	19	12	29	95.6974	76.0801	55.8589	2.12183	1.61207	1.77919	1.8377
NM_019427	Epb41l4b	3	1587	2966	1.48348	9	0	3	1	6	0	9	2	6	64.218	17.9634	16.3724	2.90417	0.881669	1.69189	1.82591
NM_172409	Fmnl2	275	3527	5851	4.20926	10	0	14	1	30	1	10	13	29	34.7551	56.8729	38.5447	1.37145	1.90014	2.12515	1.79891
NM_001302384	March8	272	1133	4347	5.91286	1	0	6	0	13	1	1	6	12	13.127	99.1427	60.2415	-0.244063	2.49198	2.50803	1.58531
NM_027604	Usp15	104	3050	11549	16.2024	26	1	21	6	52	1	25	15	51	95.9129	72.4388	74.8264	1.99978	1.41655	2.04562	1.82065
NM_030110	Micu3	0	1572	3268	35.7671	18	2	21	0	27	3	16	21	24	115.037	190.055	65.9897	1.77084	2.31898	1.25536	1.78173
NM_177049	Jph4	1116	3003	4489	61.2765	24	1	23	3	69	1	23	20	68	137.761	150.789	155.759	1.69692	1.65254	2.08035	1.80994
NM_011789	Apc2	18	6843	9074	21.4716	54	4	44	5	176	3	50	39	173	82.8013	81.297	109.562	1.61303	1.40906	2.37922	1.80044
NM_030168	Rictor	22	5149	9314	13.2334	34	1	27	7	110	2	33	20	108	72.7479	55.4983	91.0495	1.72653	1.15727	2.48439	1.7894
NM_001025431	Btbd3	320	1706	4638	64.089	16	3	18	2	62	1	13	16	61	106.011	164.236	190.232	1.29113	1.74806	2.33428	1.79116
NM_177124	Tnrc6b	190	5515	17125	12.7398	35	4	24	2	110	0	31	22	110	65.7978	58.7781	89.2875	1.60525	1.26359	2.48543	1.78476
NM_001081242	Tln2	200	7829	12134	28.7631	68	9	67	9	212	5	59	58	207	87.4086	108.162	117.279	1.50979	1.64038	2.25259	1.80092
NM_001037136	Agap1	619	3034	9422	14.0226	16	1	15	2	44	1	15	13	43	70.2011	76.5841	76.9606	1.63918	1.58609	2.19731	1.80753
NM_172805	Kcnh5	804	3771	4061	7.17688	18	1	12	1	33	0	17	11	33	64.7591	52.7458	48.0744	1.9383	1.46185	2.03356	1.81123
NM_011086	Pikfyve	158	6317	11255	16.1285	47	1	39	3	107	2	46	36	105	84.4145	83.1582	73.6879	1.81838	1.61847	2.02702	1.82129
NM_001290702	Tenm2	75	8277	9656	52.5767	139	5	82	4	211	7	134	78	204	184.652	135.297	107.505	2.21456	1.59072	1.66319	1.82282
NM_001171054	Mta3	95	1637	1727	23.7553	17	1	16	1	18	0	16	15	18	117.275	138.395	50.4551	2.0525	2.11414	1.18282	1.78315
NM_001033536	Rfx7	580	4960	8000	4.32753	15	1	14	1	51	1	14	13	50	36.1263	42.2262	49.3416	1.41008	1.45342	2.46011	1.77454
NM_172662	Gtdc1	187	1525	2564	11.8952	6	1	8	1	29	0	5	7	29	42.2361	74.4311	93.6827	1.00824	1.64659	2.60751	1.75411
NM_001014981	Wdr7	238	4708	7109	82.8768	76	11	56	4	187	2	65	52	185	164.352	165.504	178.888	1.76423	1.60035	2.04788	1.80415
NM_001033279	D17Wsu92e	208	1084	3812	34.8642	7	0	8	0	24	0	7	8	24	90.3158	129.927	118.42	1.43765	1.78606	2.11862	1.78078
NM_001163026	Dnajc13	245	6977	7697	17.0638	53	7	48	6	122	2	46	42	120	77.2295	88.7601	77.0468	1.65508	1.67771	2.04798	1.79359
NM_001123327	Qser1	206	5303	8975	1.25153	12	1	11	1	24	0	11	10	24	24.392	27.9125	20.3523	1.61308	1.62255	2.13657	1.79073
NM_001122730	Tnrc18	360	8928	10304	8.27491	36	3	50	9	130	6	33	41	124	43.5315	68.0796	62.5546	1.27696	1.74208	2.30392	1.77432
NM_198114	Dagla	100	3235	5634	27.9405	34	1	21	2	76	2	33	19	74	118.972	86.2241	102.026	1.97256	1.33128	2.0739	1.79258
NM_001025429	Spag9	160	3667	6913	63.1605	38	3	51	5	122	2	35	46	120	112.798	186.61	147.898	1.38971	1.94133	1.98235	1.77113
NM_001163175	Begain	50	1910	2712	14.5138	17	1	8	2	38	0	16	6	38	97.2247	45.8935	88.3056	2.08766	0.826067	2.36922	1.76098
NM_015771	Lats2	436	3565	5191	9.42735	14	1	15	0	50	0	13	15	50	46.9578	68.2022	69.0688	1.30537	1.66413	2.34657	1.77202
NM_021323	Usp29	1416	4026	7476	10.3059	18	1	11	2	44	2	17	9	42	73.617	49.0585	69.5546	1.89877	1.13378	2.28817	1.77357
NM_152923	Kcnq3	0	2622	2878	43.8449	32	2	26	3	76	1	30	23	75	129.318	124.798	123.636	1.81334	1.58638	2.00455	1.80142
NM_001098528	Kcnb2	0	2724	5309	11.0113	17	2	17	0	33	1	15	17	32	62.2377	88.788	50.7762	1.61545	1.94874	1.78325	1.78248
NM_134013	Psme4	208	5740	6442	10.1331	35	2	25	6	96	2	33	19	94	67.422	48.8634	73.4451	1.78244	1.13848	2.37969	1.76687
NM_001081302	Trio	352	9664	11497	33.5988	95	10	80	12	266	6	85	68	260	103.168	103.891	120.683	1.65253	1.48627	2.17437	1.77106
NM_008997	Rab11b	224	881	6065	15.3235	4	0	4	0	11	0	4	4	11	68.812	86.6178	72.3677	1.55532	1.70891	2.04032	1.76818
NM_001081064	Pdzd2	0	8391	13413	4.38548	32	5	28	3	96	5	27	25	91	36.368	42.3876	46.8754	1.41145	1.45071	2.37591	1.74602
NM_177231	Arrb1	293	1550	7112	34.023	11	0	10	0	34	0	11	10	34	98.907	113.182	116.913	1.5839	1.60209	2.11892	1.7683
NM_175561	Pcnx2	236	6605	7236	28.4691	65	5	63	12	129	2	60	51	127	106.475	113.923	86.1886	1.80083	1.7216	1.81611	1.77951
NM_024272	Ssbp2	90	1176	6656	10.43	10	0	4	0	14	2	10	4	12	104.073	52.4014	47.7605	2.39084	1.22148	1.73663	1.78298
NM_009783	Cacna1g	581	7469	8223	9.13746	35	1	31	2	98	0	34	29	98	55.7899	59.8987	61.4965	1.57339	1.49613	2.20306	1.75753
NM_001001144	Scap	247	4078	4226	25.636	26	1	32	2	92	1	25	30	91	73.756	111.409	102.671	1.33617	1.75416	2.14918	1.7465
NM_001256431	Agap3	30	1218	2074	44.1371	10	2	13	2	48	1	8	11	47	76.1103	131.731	171.001	1.04446	1.66028	2.46735	1.72403
NM_026604	Fam135a	412	4933	6467	5.95662	25	2	15	1	48	1	23	14	47	57.4994	44.0561	44.9346	1.88237	1.31726	2.07943	1.75968
NM_173369	Cyld	222	3081	8014	35.4562	29	1	29	5	71	2	28	24	69	110.691	119.429	104.316	1.7207	1.65411	1.92273	1.76585
NM_028451	Larp1	129	3348	6617	22.1739	27	2	22	2	68	1	25	20	67	87.7786	88.3938	89.9645	1.67728	1.50992	2.07015	1.75245
NM_198702	Adgrl3	513	5145	5812	47.7349	62	5	51	6	118	1	57	45	117	139.084	138.215	109.178	1.86564	1.68119	1.75976	1.76886
NM_001198571	Abi2	184	1627	5875	65.6192	19	3	20	1	45	1	16	19	44	125.321	187.327	131.796	1.51791	1.92327	1.78669	1.74262
NM_172859	Dzank1	127	2464	6831	42.8745	24	1	25	3	64	1	23	22	63	111.234	133.93	116.52	1.6099	1.70208	1.93624	1.74941
NM_181595	Ppp1r9a	350	3638	9547	16.7456	22	4	27	6	61	0	18	21	61	61.8743	90.8657	80.1891	1.34694	1.72316	2.12013	1.73008
NM_175211	Ralgps1	289	2047	6308	7.41727	10	1	7	0	20	1	9	7	19	57.862	56.6489	46.7145	1.75539	1.54449	1.96682	1.75557
NM_009027	Rasgrf2	0	3261	7286	10.9521	30	2	13	5	53	0	28	8	53	97.0458	34.9021	70.2494	2.25967	0.60502	2.25573	1.70681
NM_008413	Jak2	424	3823	5055	10.805	25	1	20	3	37	1	24	17	36	79.8049	71.1558	45.7793	1.98587	1.64104	1.64834	1.75842
NM_001164483	Synj1	118	4942	7085	118.367	82	6	84	13	215	5	76	71	210	178.064	209.394	188.161	1.65871	1.71952	1.84668	1.74164
NM_029094	Pik3cb	348	3543	4854	10.398	23	0	15	3	41	0	23	12	41	81.3629	53.4347	55.4664	2.03759	1.25156	1.95479	1.74798
NM_172965	Sap130	113	3284	4015	5.38096	17	2	10	0	30	0	15	10	30	53.4644	44.8659	40.8924	1.84045	1.40632	2.02159	1.75612
NM_198298	Helz	96	5994	6218	9.243	34	1	29	3	70	0	33	26	70	63.2381	62.7164	51.2992	1.74705	1.55535	1.93266	1.74502
NM_001033347	D430041D05Rik	171	4416	10124	29.3131	52	2	32	1	76	4	50	31	72	133.126	103.895	73.3115	2.10498	1.57062	1.56019	1.74526
NM_177077	Exoc6b	108	2541	5440	41.2415	24	3	28	3	62	1	21	25	61	97.5544	146.188	108.369	1.44467	1.85241	1.86148	1.71952
NM_010890	Nedd4	210	2874	5494	126.436	46	11	43	8	168	7	35	35	161	148.492	186.916	261.222	1.35579	1.51496	2.26928	1.71334
NM_001081458	Ppp2r5c	120	1479	2368	26.5076	10	2	15	4	34	1	8	11	33	66.5335	115.156	104.957	1.16675	1.78122	2.15524	1.70107
NM_001165989	Ckap5	37	6136	6577	53.1867	90	4	58	11	188	5	86	47	183	159.371	109.636	129.691	1.99498	1.28019	1.925	1.73339
NM_001135019	Zfp266	462	2277	6274	11.3491	12	0	11	1	19	0	12	10	19	74.7264	78.3855	45.2475	1.86054	1.7503	1.5937	1.73485
NM_144825	Taok1	698	3704	12409	49.2754	38	8	29	3	100	2	30	26	98	112.798	123.054	140.914	1.54372	1.49395	2.10347	1.71371
NM_153125	Sec16a	211	7285	8739	10.4891	31	4	41	7	123	2	27	34	121	43.1388	68.3796	73.9329	1.11679	1.60196	2.36268	1.69381
NM_001081152	Npat	105	4368	7347	3.83763	14	3	13	1	45	0	11	12	45	29.164	40.0478	45.6262	1.17575	1.45122	2.43956	1.68884
NM_198420	Arhgap39	260	3497	4494	31.251	27	0	30	3	74	4	27	27	70	94.2737	118.668	93.4701	1.5674	1.72287	1.86142	1.71723
NM_001143834	Grm5	718	4330	8524	112.964	71	2	53	4	132	3	69	49	129	215.909	193.002	154.369	1.96572	1.63078	1.59703	1.73118
NM_011845	Mid2	24	2082	5916	4.72684	6	2	8	0	25	0	4	8	25	21.9677	55.3041	52.5064	0.637662	1.78815	2.48193	1.63591
NM_198865	Slitrk5	617	3491	4807	30.3636	21	0	27	1	65	4	21	26	61	82.5852	128.706	91.7404	1.3943	1.85782	1.85663	1.70292
NM_001193266	Mdga2	1507	4378	9834	5.10579	16	1	9	1	24	0	15	8	24	59.0511	39.6433	36.1323	2.0164	1.2602	1.88342	1.72001
NM_145959	Fam91a1	238	2752	5621	14.8123	16	5	17	1	47	2	11	16	45	49.4535	90.5456	77.3686	1.09977	1.79384	2.16281	1.68548
NM_001039472	Kif21b	321	5196	9119	7.64642	27	0	21	1	49	2	27	20	47	62.5978	58.3671	41.6716	1.85001	1.5688	1.77862	1.73248
NM_001045524	Cep126	84	3396	3647	3.90904	16	0	11	3	24	0	16	8	24	54.6008	34.3647	31.3212	2.06905	1.21903	1.88266	1.72358
NM_198625	Mtss1l	246	2394	4718	8.55751	11	1	10	3	34	1	10	7	33	52.6181	46.3635	66.4044	1.52962	1.1671	2.36426	1.687
NM_001029873	Unc13a	110	5249	7960	73.8586	68	3	64	9	190	4	65	55	186	142.957	152.264	156.441	1.63448	1.55122	1.94304	1.70958
NM_178930	Gbf1	245	5831	6401	19.1564	45	2	28	5	127	0	43	23	127	87.0036	58.5787	98.2698	1.75523	1.00671	2.31003	1.69066
NM_177855	Med12l	24	6582	10249	5.14044	29	2	24	3	60	1	27	21	59	46.5331	45.5576	38.8864	1.6685	1.45664	1.98419	1.70311
NM_001081068	Ltn1	139	5443	7737	14.4901	31	7	38	4	87	0	24	34	87	51.142	91.1986	70.8979	1.16185	1.8178	2.05372	1.67779
NM_009124	Atxn1	908	3284	10584	18.5008	16	1	15	1	45	1	15	14	44	71.3534	83.829	80.043	1.49074	1.5453	2.04084	1.69229
NM_177208	Dopey1	250	7639	9124	7.98599	46	2	27	8	100	0	44	19	100	67.3033	36.5831	58.4967	1.92762	0.867986	2.23449	1.6767
NM_001018042	Sp3	190	2542	4178	19.0064	28	3	12	5	51	2	25	7	49	120.136	42.3422	90.0484	2.22563	0.543288	2.19003	1.65298
NM_172806	Btbd7	450	3843	4306	2.11563	7	1	12	0	17	0	6	12	17	19.9865	50.3165	21.6562	1.00002	2.14838	1.82243	1.65694
NM_009029	Rb1	150	2916	4625	8.3874	16	2	14	1	27	0	14	13	27	57.2065	66.8658	42.1919	1.6627	1.70778	1.72539	1.69862
NM_178363	Ylpm1	169	6589	7034	18.2217	43	5	46	5	114	2	38	41	112	66.8988	90.8576	75.405	1.40717	1.67085	1.96642	1.68148
NM_015820	Hs6st3	150	1563	1784	27.6418	17	1	12	0	17	0	16	12	17	127.982	120.824	52.0025	2.08454	1.82465	1.10987	1.67302
NM_001290528	Map3k10	557	3380	3669	14.683	13	0	23	5	47	1	13	18	46	52.0478	90.714	70.4311	1.17898	1.80194	2.03402	1.67165
NM_153131	Unc5a	230	2927	3974	21.7441	18	1	19	1	55	1	17	18	54	71.2422	94.952	86.5426	1.38829	1.62527	2.02926	1.68094
NM_028392	Ppp2r2b	231	1572	2079	37.7869	12	2	16	2	31	0	10	14	31	84.2832	148.529	99.9195	1.28798	1.92938	1.81164	1.67633
NM_001015046	Rap1gap2	212	2351	6410	49.0878	22	4	21	0	70	3	18	21	67	95.1111	139.676	135.388	1.30003	1.67909	2.04869	1.67594
NM_001291119	Neurl4	82	4702	5195	24.992	35	2	39	2	86	3	33	37	83	80.7312	113.939	77.6521	1.48232	1.80226	1.76582	1.68347
NM_021899	Foxj2	801	2499	5013	6.15912	8	1	5	0	21	1	7	5	20	46.594	41.8933	50.9108	1.55823	1.22399	2.23386	1.67203
NM_008914	Ppp3cb	133	1711	3831	120.689	24	3	31	1	56	1	21	30	55	150.412	270.475	150.651	1.40318	2.0768	1.51099	1.66366
NM_001243044	Ap1b1	254	3095	4097	42.8942	27	1	26	3	84	2	26	23	82	103.436	115.178	124.756	1.50475	1.48419	2.03442	1.67445
NM_009261	Strbp	167	2186	16348	28.9881	24	5	18	1	34	2	19	17	32	106.362	119.791	68.5064	1.78809	1.7829	1.47096	1.68065
NM_001163387	Nlgn1	361	2806	4603	36.7427	28	0	16	1	60	0	28	15	60	129.434	87.2821	106.069	1.92426	1.1797	1.91936	1.67444
NM_021450	Trpm7	285	5877	7145	5.76476	25	2	21	1	52	2	23	20	50	46.4869	50.8833	38.6474	1.59596	1.54533	1.88715	1.67615
NM_133665	Mef2d	434	1958	5406	11.1294	8	1	6	1	30	0	7	5	30	51.9138	46.6764	85.0851	1.34716	1.01448	2.51981	1.62715
NM_144515	Zfp52	454	2629	3164	1.94098	6	0	5	0	10	0	6	5	10	31.179	32.7057	19.8728	1.69501	1.58011	1.7647	1.67994
NM_010630	Kifc2	26	2405	3143	57.9975	26	1	31	7	74	2	25	24	72	118.772	143.526	130.814	1.51707	1.61529	1.87085	1.66774
NM_172819	Dip2b	61	4084	8127	19.5907	24	1	24	2	89	1	23	22	88	64.6171	77.801	94.5475	1.31217	1.40228	2.23709	1.65051
NM_145452	Rasa1	579	3696	5101	22.0126	30	1	15	1	67	5	29	14	62	105.155	63.9004	85.975	1.94239	1.04631	2.01033	1.66634
NM_001166164	Ccdc74a	55	1150	1278	1.65729	2	0	3	1	7	0	2	2	7	20.6436	25.9853	27.6313	1.19816	1.34587	2.36172	1.63525
NM_001013386	Rasl10b	661	1273	3481	12.1166	3	0	4	1	10	1	3	3	9	55.4038	69.7401	63.5636	1.38831	1.54128	2.03375	1.65444
NM_001291214	Myo18a	77	5180	6333	21.6342	37	3	40	4	89	2	34	36	87	75.3049	100.367	73.6904	1.47144	1.70841	1.80122	1.66036
NM_177006	Nwd2	1067	6296	8539	9.81389	25	0	26	1	64	3	25	25	61	54.037	68.0196	50.423	1.48303	1.63544	1.86172	1.66006
NM_029933	Bcl9	626	4904	6102	6.85846	23	4	14	3	59	1	19	11	58	50.1975	36.5818	58.6009	1.59898	0.961953	2.35411	1.63835
NM_172730	Ccdc174	92	1496	1757	8.11754	2	4	20	8	38	11	-2	12	27	1	121.598	83.1216	-4.15512	2.59076	2.7288	0.388147
NM_010412	Hdac5	368	3713	3795	33.2267	21	0	32	2	84	2	21	30	82	70.9566	127.596	105.958	1.11945	1.78966	1.9952	1.63477
NM_173437	Nav1	35	5663	12767	13.3181	42	4	27	2	78	1	38	25	77	76.3131	63.1973	59.1363	1.7916	1.34075	1.85688	1.66307
NM_172903	Man2a2	493	3952	6554	28.4339	24	1	29	8	96	1	23	21	95	75.1531	86.3737	118.711	1.29898	1.32296	2.27895	1.63363
NM_030702	Senp3	319	2026	2442	23.3259	10	1	16	2	33	0	9	14	33	59.5907	116.683	83.5599	1.08708	1.87921	1.92466	1.63032
NM_001081557	Camta1	99	5148	8448	41.1402	61	2	37	5	133	1	59	32	132	132.074	90.169	113.002	1.88326	1.15682	1.92377	1.65461
NM_175750	Plxna4	974	6656	12602	40.7535	60	6	52	5	142	3	54	47	139	107.414	117.682	105.738	1.59096	1.54684	1.83517	1.65766
NM_010106	Eef1a1	120	1509	1790	1136.6	61	10	70	9	170	6	51	61	164	414.99	624.799	510.339	1.47614	1.89941	1.54665	1.64074
NM_013892	Pcsk1n	109	886	2193	29.9204	4	1	10	2	21	1	3	8	20	43.6385	146.481	111.257	0.48314	2.05354	2.1462	1.56096
NM_029348	Zbtb4	250	3199	7824	15.3361	21	0	18	5	47	1	21	13	46	80.4848	62.7164	67.4218	1.78086	1.24258	1.93755	1.65366
NM_001110780	Syn1	129	2142	3175	127.545	34	4	29	4	103	3	30	25	100	168.441	176.689	214.721	1.53223	1.42838	1.97975	1.64679
NM_134063	Fam208b	560	7709	8338	6.34515	34	1	26	3	70	2	33	23	68	52.1721	45.7715	41.1132	1.7029	1.33333	1.90261	1.64628
NM_010200	Fgf13	373	1111	2499	52.0224	8	2	7	1	29	1	6	6	28	91.8892	115.666	163.991	1.21429	1.37111	2.28055	1.62198
NM_194341	Synrg	45	3462	7112	16.3008	22	2	19	4	67	0	20	15	67	66.1538	62.4538	84.7515	1.46012	1.19884	2.22066	1.62654
NM_010308	Gnao1	498	1563	2948	79.2852	15	2	13	0	34	0	13	13	34	137.963	173.663	137.99	1.5392	1.69714	1.70745	1.64793
NM_011352	Sema7a	16	2011	3275	32.2768	23	1	16	3	39	1	22	13	38	124.638	92.7071	82.33	1.95018	1.34675	1.6535	1.65014
NM_001033420	Dock1	112	5710	6815	1.13068	11	1	8	2	34	1	10	6	33	20.19	15.2486	25.4799	1.40331	0.813051	2.53883	1.58506
NM_001113386	Lifr	415	2575	2844	14.668	11	1	16	1	29	0	10	15	29	52.3258	98.7985	58.0312	1.1873	1.92574	1.75542	1.62282
NM_001166398	Armcx2	873	3228	3614	31.5109	25	4	15	2	62	2	21	13	60	100.785	78.5353	110.123	1.65862	1.12224	2.09159	1.62415
NM_178395	Zdhhc2	228	1329	2498	17.7588	8	2	8	0	16	0	6	8	16	61.5933	103.375	62.8131	1.30393	1.87295	1.72261	1.63316
NM_001161747	Palm	164	1184	2519	22.6133	9	0	7	0	14	0	9	7	14	99.7268	97.6361	59.326	1.84922	1.64127	1.45437	1.64829
NM_001098837	Atxn7l3	287	1331	3686	28.4488	7	0	9	2	26	1	7	7	25	75.7822	95.3916	103.504	1.31069	1.46591	2.08078	1.61913
NM_001045513	Raph1	201	4002	9117	9.37596	24	1	11	2	59	1	23	9	58	68.3911	33.6866	65.955	1.85121	0.649865	2.28422	1.5951
NM_028291	Pan3	0	2514	4628	10.3442	16	1	11	1	29	0	15	10	29	67.4366	56.591	49.8597	1.76996	1.33756	1.80504	1.63752
NM_008702	Nlk	1159	2743	4496	14.8706	13	0	9	0	15	0	13	9	15	92.7594	80.8351	40.9311	2.00476	1.62776	1.24124	1.62458
NM_198967	Tmtc1	153	2982	8346	12.3845	14	3	15	2	51	0	11	13	51	43.947	65.3767	77.921	1.04052	1.43456	2.31074	1.59527
NM_177819	Fam135b	189	4401	4623	26.6577	34	1	28	3	91	1	33	25	90	88.5514	84.4431	92.3574	1.57568	1.3302	1.9664	1.62409
NM_028777	Sec14l1	210	2370	2869	95.2164	44	1	22	3	75	2	43	19	73	225.001	125.145	146.079	2.13126	1.11134	1.64883	1.63048
NM_001007573	Maneal	4	1363	2727	12.5	12	2	6	2	22	1	10	4	21	83.1668	41.8748	66.7909	1.955	0.786129	2.08124	1.60746
NM_144868	Pcnx3	759	6846	7264	8.41995	29	1	25	0	67	2	28	25	65	51.9905	58.4318	46.1559	1.52237	1.51088	1.85196	1.6284
NM_008913	Ppp3ca	778	2344	4846	593.846	46	8	58	3	136	3	38	55	133	274.259	499.67	367.094	1.28132	1.97801	1.57057	1.60997
NM_020508	Brd4	265	4468	5948	12.3432	31	1	17	1	54	1	30	16	53	80.6736	54.1593	54.5047	1.91892	1.16505	1.79767	1.62722
NM_146193	Btbd1	40	1507	3001	40.0816	13	1	11	1	44	0	12	10	44	92.4529	96.9801	129.64	1.38488	1.27798	2.14198	1.60161
NM_001081288	Taf2	223	3820	5033	9.81067	20	1	14	0	45	2	19	14	43	59.7012	55.3733	51.6708	1.62704	1.33888	1.89724	1.62105
NM_011250	Rbl2	119	3527	4925	9.40096	18	1	15	2	43	2	17	13	41	56.3792	54.2696	51.9998	1.57091	1.33619	1.9392	1.61543
NM_015802	Dlc1	348	3627	6171	8.90309	25	1	11	6	52	2	24	5	50	82.7255	21.6941	65.9092	2.15784	0.0469579	2.32302	1.50927
NM_001003918	Usp7	57	3369	5427	40.146	32	5	28	6	103	1	27	22	102	92.1389	94.5029	133.115	1.37897	1.23965	2.1789	1.59918
NM_009469	Ulk1	357	3513	5196	14.4888	13	1	16	2	71	1	12	14	70	42.9748	63.1108	95.869	0.910893	1.28673	2.48911	1.56224
NM_001081418	Gltscr1	107	4844	5360	1.11378	13	1	8	3	20	0	12	5	20	28.6317	15.0169	18.2492	1.91662	0.800256	2.06888	1.59525
NM_015806	Mapk6	772	2935	4205	11.0645	11	2	12	0	28	2	9	12	26	47.0279	78.9291	51.9558	1.20819	1.77596	1.81268	1.59894
NM_001081750	Zfp664	991	1777	4078	12.0216	8	0	2	0	9	0	8	2	9	115.037	36.201	49.4923	2.44723	0.600181	1.6788	1.5754
NM_009147	Sec23a	197	2495	4108	57.6282	34	2	21	3	63	3	32	18	60	157.387	111.438	112.854	1.92716	1.25417	1.6627	1.61468
NM_030266	Inpp4a	447	3267	5748	38.5879	26	6	24	3	85	3	20	21	82	80.1587	105.946	125.685	1.20258	1.429	2.12648	1.58602
NM_001163635	Tnks2	306	3807	6481	59.856	43	1	29	6	127	1	42	23	126	135.59	93.4649	155.559	1.68856	0.976991	2.09653	1.58736
NM_027626	Psd3	189	1320	9210	126.875	20	3	17	3	52	1	17	14	51	169.885	176.108	194.906	1.54782	1.42688	1.84411	1.60627
NM_011062	Pdpk1	134	1814	7160	40.326	15	1	17	2	40	2	14	15	38	94.1864	127.027	97.7669	1.40791	1.66359	1.73021	1.60057
NM_001168304	Cdk19	286	1792	5807	10.0769	13	0	6	2	16	0	13	4	16	97.5636	37.7875	45.9211	2.31902	0.77106	1.70645	1.59884
NM_009384	Tiam1	503	5279	7290	36.3821	52	3	42	6	92	1	49	36	91	115.958	107.239	82.3558	1.77177	1.48286	1.56188	1.6055
NM_025730	Lrrk2	57	7641	8230	11.0808	36	2	35	3	109	1	34	32	108	50.6699	60.0294	61.5521	1.31489	1.38016	2.05607	1.58371
NM_001142642	Fbrsl1	336	3432	4723	3.1906	9	0	8	0	20	0	9	8	20	32.8557	36.7622	27.922	1.46226	1.44178	1.8731	1.59238
NM_001035854	Ap2b1	164	3020	5411	143.806	61	4	36	6	137	3	57	30	134	225.573	149.443	202.798	1.87914	1.11265	1.80506	1.59895
NM_178651	Slc30a9	140	1844	3410	47.4899	19	2	13	5	69	1	17	8	68	112.758	66.7933	172.487	1.56611	0.635226	2.42353	1.54162
NM_172829	St6gal2	155	1472	2278	14.6564	14	0	6	1	13	0	14	5	13	120.147	54.0128	42.6653	2.38699	1.05504	1.31226	1.58477
NM_001173477	Speg	285	627	1408	17.7537	1	0	6	0	2	0	1	6	2	33.0479	249.596	25.2768	0.405892	3.14483	0.409577	1.3201
NM_177750	Frmpd3	420	807	1401	1.97287	2	0	0	0	3	0	2	0	3	58.4102	1	33.5064	2.59055	-3.46143	2.50581	0.544978
NM_015794	Fbxl17	563	2669	16991	6.92188	9	1	9	2	25	2	8	7	23	42.934	47.2881	47.2049	1.36778	1.32662	2.03504	1.57648
NM_207221	Jmjd1c	0	7593	8382	14.4881	53	5	40	7	110	0	48	33	110	71.4492	61.832	62.6176	1.64435	1.25722	1.87465	1.59207
NM_001112723	Arhgef10l	166	3877	4382	8.49216	13	1	20	1	40	0	12	19	40	36.5477	72.8409	46.5893	1.0086	1.8236	1.85888	1.56369
NM_010251	Gabra4	499	2158	4123	30.0115	13	1	15	3	34	0	12	12	34	81.7531	102.908	88.5829	1.38693	1.54229	1.81507	1.58143
NM_001033351	Grin3a	688	4036	7651	9.6081	20	4	15	1	38	1	16	14	37	54.0137	59.4915	47.7676	1.49555	1.45527	1.79997	1.58359
NM_010050	Dio2	753	1554	6414	1.24047	1	0	2	0	3	0	1	2	3	14.1103	35.523	16.1885	0.82893	1.97588	1.81317	1.53933
NM_001040398	Setd1b	276	6234	8858	2.45392	16	1	14	3	41	1	15	11	40	28.4551	26.2667	29.0186	1.41766	1.11895	2.13056	1.55572
NM_001276360	Camsap1	344	5126	8014	29.7711	34	0	37	4	107	5	34	33	102	80.3598	98.1786	92.1951	1.36712	1.47939	1.87892	1.57514
NM_007804	Cux2	453	4734	5113	8.78431	23	0	18	0	37	0	23	18	37	60.7229	59.8191	37.3572	1.72008	1.51856	1.51425	1.5843
NM_027118	Cdk13	446	4802	6901	16.1446	36	2	23	1	53	2	34	22	51	88.2187	71.8534	50.6057	1.88136	1.40706	1.48413	1.59085
NM_001302635	Phactr1	176	1919	5256	87.0271	29	1	22	5	55	2	28	17	53	181.564	138.76	131.43	1.8776	1.31589	1.56554	1.58634
NM_011211	Ptprd	879	5406	9127	27.6694	38	4	31	5	102	4	34	26	98	84.8864	81.7101	93.5692	1.49159	1.25972	1.95656	1.56929
NM_001081034	Fbxo11	33	2826	4013	44.7998	28	4	30	8	77	1	24	22	76	97.1203	112.064	117.614	1.3869	1.41779	1.91595	1.57354
NM_025788	Nacc1	196	1741	4304	24.3887	10	1	8	1	43	0	9	7	43	65.8391	64.4588	120.298	1.2033	0.995547	2.41612	1.53832
NM_001008506	Zc3h14	155	1970	3163	21.9006	15	2	9	1	39	1	13	8	38	80.9536	62.7084	90.4949	1.5682	1.0223	2.08817	1.55956
NM_025481	Smurf2	483	2730	5331	4.75418	9	1	6	0	20	1	8	6	19	40.2399	37.9893	36.5484	1.50733	1.24279	1.95481	1.56831
NM_001290646	Lhx2	528	1626	2234	7.43898	4	0	6	1	10	0	4	5	10	41.1744	64.7859	39.3654	1.26271	1.73632	1.71763	1.57222
NM_144946	Neto1	931	2533	3531	15.2855	6	0	8	0	33	1	6	8	32	42.331	71.0461	86.3386	0.855909	1.42453	2.29688	1.52578
NM_008882	Plxna2	643	6328	11036	21.1556	43	2	29	4	115	2	41	25	113	81.5123	62.5637	85.9143	1.59959	1.04034	2.03985	1.55993
NM_001290770	Tro	66	6330	7153	57.6487	82	2	58	13	188	8	80	45	180	144.347	102.205	124.205	1.80216	1.12917	1.80068	1.57734
NM_001081279	Mfhas1	575	3722	6408	8.06103	12	1	14	2	38	0	11	12	38	39.5062	54.2497	52.192	1.15322	1.43065	2.06277	1.54888
NM_153396	Mical3	294	2889	2929	5.08011	13	0	8	2	21	1	13	6	20	56.6207	32.8947	33.3127	1.9589	0.994095	1.77008	1.57436
NM_001163632	Satb1	162	2457	6168	28.0233	23	2	15	2	43	0	21	13	43	103.42	80.5885	80.9847	1.76862	1.23193	1.7384	1.57965
NM_001001735	Whsc1l1	497	2465	3652	10.0296	11	1	14	0	12	2	10	14	10	57.4308	101.208	21.963	1.55741	2.19531	0.645991	1.46624
NM_153403	Ago1	162	2736	7227	15.224	11	1	17	4	50	1	10	13	49	43.9098	71.8534	82.282	0.911236	1.44332	2.23056	1.52837
NM_030563	N4bp1	239	2921	6469	8.65394	19	0	6	1	33	0	19	5	33	80.069	26.5231	53.183	2.12836	0.354438	2.03533	1.50604
NM_001159964	Eps15	130	1882	4234	115.94	22	3	26	2	81	3	19	24	78	122.571	194.89	192.432	1.13279	1.62876	1.895	1.55218
NM_029426	Brsk2	335	2297	4047	34.4811	17	1	15	0	40	0	16	15	40	92.1702	108.769	88.1208	1.47383	1.53645	1.70076	1.57035
NM_177296	Tnpo3	122	2894	3971	26.1156	19	2	23	1	51	3	17	22	48	69.3147	112.913	74.8454	1.23507	1.76204	1.67889	1.55867
NM_133910	Tbc1d14	60	2145	4590	19.0186	11	1	16	2	34	0	10	14	34	54.208	95.5289	70.4839	1.07714	1.71673	1.83613	1.54334
NM_001127363	Inpp5a	281	1520	2826	4.8967	3	0	6	0	8	0	3	6	8	27.3665	68.8958	27.9085	0.932789	2.08337	1.54299	1.51971
NM_019737	B4galt6	937	2086	5808	26.9696	9	0	5	0	30	2	9	5	28	88.5303	61.9103	105.331	1.56812	0.87521	2.14708	1.53014
NM_001111304	Tbc1d9	723	4518	5848	25.6532	32	1	20	1	76	1	31	19	75	92.325	71.2286	85.4214	1.65972	1.1084	1.88331	1.55048
NM_008746	Ntrk3	55	2533	2978	43.071	30	3	21	3	54	1	27	18	53	123.149	103.344	92.4468	1.75387	1.32523	1.59884	1.55931
NM_001146027	Rnf44	393	1449	3799	12.9667	6	0	7	1	12	2	6	6	10	64.218	80.8351	40.9311	1.55924	1.71239	1.3466	1.53941
NM_001290633	Reps2	151	2095	7686	80.7431	24	3	16	1	91	2	21	15	89	122.094	109.776	197.884	1.3516	1.02416	2.21354	1.52976
NM_010147	Epn1	439	2167	2565	81.5719	14	3	25	2	72	1	11	23	71	71.948	189.364	177.596	0.582305	1.80444	2.04962	1.47879
NM_177994	R3hdm4	46	835	1821	51.5691	10	1	6	2	28	1	9	4	27	128.924	72.1266	147.912	1.70828	0.695151	2.13841	1.51395
NM_172663	Epc2	320	2747	4358	17.742	20	3	14	2	36	2	17	12	34	79.1678	70.3435	60.5517	1.66666	1.31813	1.67044	1.55174
NM_023579	Ipo5	60	3354	4595	48.1734	38	4	29	8	96	1	34	21	95	116.661	90.7002	124.657	1.60633	1.0678	1.94402	1.53938
NM_009938	Copa	381	4056	4629	73.7997	48	6	39	7	128	1	42	32	127	129.17	123.881	149.37	1.48867	1.25409	1.87692	1.53989
NM_175260	Myh10	299	6230	7783	37.8765	73	5	46	11	124	3	68	35	121	129.584	83.9562	88.181	1.90708	1.10488	1.62952	1.54716
NM_001159567	Meis2	245	1451	4737	12.2412	7	0	6	0	12	0	7	6	12	65.6025	70.781	43.0082	1.62573	1.55633	1.46229	1.54812
NM_022419	Abhd8	182	1502	1985	82.4225	12	1	17	2	53	0	11	15	53	94.1864	161.67	173.548	0.964436	1.56993	2.00838	1.51425
NM_178874	Tmcc2	203	2324	3515	24.9783	13	0	18	1	32	0	13	17	32	69.2743	114.03	65.2119	1.26185	1.80376	1.51435	1.52665
NM_001081348	Hecw1	434	5249	9460	17.7278	31	2	22	2	89	2	29	20	87	68.0724	59.0944	78.0981	1.44931	1.06723	2.03817	1.51824
NM_026521	Zfp706	277	508	4417	31.0717	2	0	2	0	3	0	2	2	3	97.856	123.177	56.1341	1.62478	1.78023	1.13022	1.51174
NM_181850	Grm3	364	3004	3536	18.8882	28	2	12	5	46	0	26	7	46	111.311	37.723	75.3132	2.11943	0.380492	1.93703	1.47899
NM_011145	Ppard	275	1598	3218	1.55218	3	0	2	0	6	0	3	2	6	25.629	21.5071	19.6024	1.55089	1.11347	1.91684	1.52706
NM_013476	Ar	1025	3725	10063	2.29209	7	0	5	0	15	0	7	5	15	29.3024	26.3463	24.0129	1.50231	1.16546	1.90985	1.52588
NM_028319	Zfp518a	521	4958	6840	3.74961	14	0	11	0	31	1	14	11	30	35.6622	35.2708	29.2246	1.48035	1.2823	1.81473	1.5258
NM_001252310	Fam19a5	193	592	2651	20.2689	3	0	2	0	6	0	3	2	6	84.9802	71.3132	64.9974	1.68627	1.25563	1.67025	1.53738
NM_010508	Ifnar1	129	1902	7014	7.15601	9	1	9	1	13	2	8	8	11	50.9977	64.1939	26.8165	1.59545	1.74703	1.19364	1.51204
NM_028759	Dcaf6	236	2867	3306	52.3526	36	4	29	4	48	1	32	25	47	137.467	135.186	77.2137	1.79149	1.59218	1.189	1.52422
NM_001004361	Tpgs2	269	1160	4029	8.47268	5	0	3	0	8	0	5	3	8	63.4252	47.9023	38.8087	1.8053	1.22036	1.59703	1.54089
NM_001197322	Foxp1	153	1884	6632	19.9984	12	2	9	0	31	0	10	9	31	65.2939	73.9704	77.4073	1.31442	1.31672	1.93268	1.52127
NM_176841	Ccdc88a	176	5714	8862	15.6739	39	1	29	7	80	1	38	22	79	77.5533	56.5174	61.6583	1.71381	1.07897	1.79188	1.52822
NM_172703	Eif4g3	477	5214	6139	40.5473	39	5	45	10	130	3	34	35	127	81.1232	105.118	115.882	1.18911	1.38709	1.97124	1.51581
NM_001033273	5031439G07Rik	170	1514	5032	9.99478	6	0	4	1	24	0	6	3	24	50.457	31.7566	77.1844	1.3728	0.525267	2.4619	1.45332
NM_172867	Zfp462	318	7806	10496	8.09852	35	2	23	1	88	1	33	22	87	49.8101	41.7993	50.2193	1.4847	1.05165	2.00362	1.51332
NM_138953	Ell2	167	2087	3652	6.40936	8	0	7	0	14	0	8	7	14	47.0932	51.8692	31.5169	1.5489	1.50754	1.51139	1.52261
NM_145941	Eif4g1	184	4987	5439	70.9669	52	5	49	12	199	7	47	37	192	110.6	109.598	172.785	1.28903	1.10153	2.11711	1.50256
NM_175155	Sash1	212	3905	7183	10.8761	20	3	15	2	52	1	17	13	51	52.0283	50.0814	59.6909	1.36462	1.13028	2.02611	1.50701
NM_001163610	Nhsl2	183	3843	12971	11.3718	21	0	17	2	38	0	21	15	38	64.8497	58.3073	44.8766	1.65478	1.32215	1.58029	1.51907
NM_198864	Slitrk3	419	3362	3732	32.2424	28	1	19	2	58	0	27	17	58	103.691	82.181	85.1834	1.6854	1.17353	1.70347	1.5208
NM_001163688	Ptpra	287	2669	3501	49.7681	26	6	24	3	61	0	20	21	61	94.8982	125.427	110.689	1.28826	1.51535	1.74752	1.51704
NM_029851	Dync2h1	89	13010	13972	4.67901	42	2	38	4	111	2	40	34	109	34.9892	37.4365	36.4626	1.3155	1.23149	1.96367	1.50355
NM_001145897	Gse1	100	3733	6513	14.3376	24	0	19	3	42	1	24	16	41	74.6647	62.6567	48.7793	1.71434	1.28279	1.52238	1.5065
NM_008846	Pip5k1b	150	1770	2527	15.1417	9	0	11	1	16	0	9	10	16	62.791	87.8208	42.6896	1.43061	1.73618	1.28803	1.48494
NM_028385	Setd5	190	4516	6470	17.6032	34	1	23	4	58	1	33	19	57	86.2178	62.4856	56.9516	1.7946	1.15209	1.58805	1.51158
NM_172513	Fam126b	250	1843	8695	27.9367	15	0	9	0	26	1	15	9	25	106.425	80.3784	67.8331	1.81187	1.23008	1.48512	1.50902
NM_001081114	Clip3	149	1793	3300	53.8135	12	0	18	1	45	2	12	17	43	82.4991	147.116	113.053	1.03778	1.69719	1.71791	1.48429
NM_025596	Prelid1	135	789	1089	39.7082	7	0	6	0	8	0	7	6	8	120.973	130.523	52.8725	1.77858	1.7123	0.85525	1.44871
NM_027045	Ccser2	262	2764	7496	22.4373	20	3	14	2	46	1	17	12	45	76.7947	68.2349	77.7396	1.47709	1.12919	1.85037	1.48555
NM_173368	Chd6	121	8257	10579	12.4323	47	6	40	5	98	1	41	35	97	56.9564	61.2026	51.5321	1.41222	1.33699	1.71124	1.48682
NM_011264	Rev3l	315	9684	10666	10.0502	52	6	38	6	108	1	46	32	107	55.4925	48.5925	49.3637	1.50661	1.13553	1.81279	1.48498
NM_019697	Kcnd2	190	2083	4546	59.9602	28	3	15	3	53	0	25	12	53	149.265	90.1869	121.016	1.82611	0.92441	1.73293	1.49448
NM_053167	Trim9	446	2813	4669	54.8584	25	5	26	3	63	4	20	23	59	95.4996	138.243	107.739	1.23696	1.59555	1.63365	1.48872
NM_001024837	Adarb1	395	2531	6586	25.1853	20	0	10	0	35	1	20	10	34	105.827	66.6057	68.801	1.86806	1.02296	1.5853	1.4921
NM_009155	Sepp1	89	1232	2030	5.99754	5	1	5	3	16	1	4	2	15	39.5534	24.8941	56.7234	1.33838	0.489489	2.41028	1.41272
NM_001081179	Heatr5b	98	6311	6437	14.4018	36	0	26	6	107	7	36	20	100	65.4894	45.7974	69.569	1.5224	0.82783	2.03112	1.46045
NM_011822	Pigq	185	1931	3115	12.1587	7	0	12	4	24	1	7	8	23	45.3131	65.1866	56.9378	1.0961	1.44172	1.87226	1.47003
NM_172688	Map3k7	156	1896	5682	9.14401	7	2	9	0	19	1	5	9	18	32.4781	73.5878	44.7137	0.792406	1.79263	1.74272	1.44259
NM_001130169	Zfp207	176	1664	2362	34.8796	18	2	9	2	35	4	16	7	31	121.531	66.928	90.0484	1.86565	0.82877	1.72314	1.47252
NM_153774	Ipo9	61	3184	6236	25.7502	22	2	26	5	52	1	20	21	51	72.3815	95.6665	70.5855	1.30628	1.53163	1.60518	1.48103
NM_018797	Plxnc1	0	4725	7045	11.4368	31	3	20	3	50	0	28	17	50	66.977	51.187	45.7389	1.69781	1.13073	1.60337	1.4773
NM_177725	Lrrc8a	154	2587	4254	7.555	15	1	10	2	18	2	14	8	16	65.0363	46.78	28.4247	1.9126	1.25697	1.23594	1.46851
NM_029792	B3gat1	217	1222	3426	35.8113	7	0	11	1	16	1	7	10	15	78.723	141.562	64.5123	1.22283	1.89324	1.22174	1.44594
NM_028410	Prkrir	27	2304	3463	14.611	10	2	15	1	32	1	8	14	31	39.7097	87.4737	58.8459	0.791683	1.7525	1.77853	1.4409
NM_020605	Jph3	64	2299	3903	53.9292	15	1	26	4	67	1	14	22	66	70.7979	140.042	127.639	0.81577	1.62476	1.89133	1.44395
NM_201407	Dennd4b	143	4676	5419	5.39254	12	0	17	2	40	1	12	15	39	29.9202	47.078	37.1874	1.00166	1.47442	1.88292	1.453
NM_011297	Rps24	75	468	857	74.448	5	0	5	1	9	0	5	4	9	143.796	144.804	98.9845	1.638	1.47383	1.27658	1.4628
NM_001129787	Igsf9b	226	4213	4239	8.1893	19	0	17	4	38	2	19	13	36	53.8613	46.3884	39.0278	1.5906	1.19504	1.6313	1.47232
NM_008052	Dtx1	847	2731	3715	20.2031	16	0	10	0	20	0	16	10	20	95.9862	75.5147	45.8845	1.86398	1.34023	1.17038	1.4582
NM_001159604	Pum1	120	3687	5348	27.618	27	3	23	4	74	0	24	19	74	76.0462	75.7815	89.6698	1.33409	1.1522	1.89658	1.46096
NM_001025364	Rtn2	95	710	1080	14.2519	3	0	2	0	11	0	3	2	11	55.1335	46.2666	77.3099	1.28056	0.848994	2.19137	1.44031
NM_007499	Atm	139	9340	11964	3.83837	22	2	30	4	69	1	20	26	68	24.5677	40.2023	31.9441	0.928207	1.45665	1.9251	1.43665
NM_001081255	Lrch3	42	2379	5918	2.13946	6	1	5	0	12	1	5	5	11	24.1814	30.4385	20.3447	1.26794	1.41633	1.72369	1.46932
NM_133791	Wwc2	355	3919	5042	11.1185	22	0	13	2	40	0	22	11	40	69.7677	43.9104	48.5109	1.77421	0.926953	1.70996	1.47037
NM_146224	Zfp280d	183	3108	4372	13.1397	15	1	14	0	34	0	14	14	34	54.0968	68.0949	50.2424	1.30358	1.45677	1.63211	1.46415
NM_001284373	Atf2	360	1530	3943	29.6946	12	2	8	1	19	0	10	7	19	96.6015	85.1187	70.1916	1.63428	1.27505	1.4875	1.46561
NM_030675	Krit1	321	2532	6105	7.61089	9	0	10	0	16	2	9	10	14	46.0069	64.3463	27.3689	1.40864	1.71238	1.17567	1.43223
NM_011774	Slc30a4	243	1536	5482	14.4782	6	0	5	0	21	0	6	5	21	52.4472	55.0154	70.2002	1.19872	1.08913	2.04008	1.44264
NM_001159662	Ppp1r16b	214	1921	6392	15.5344	10	1	12	5	27	1	9	7	26	59.5907	58.3414	65.8351	1.33926	1.13032	1.89331	1.4543
NM_053009	Zfp91	790	2509	5609	29.2167	15	1	9	2	41	1	14	7	40	92.0496	57.9342	100.578	1.57471	0.73001	2.01892	1.44121
NM_028722	Msl1	62	1913	4340	17.4783	6	0	16	0	23	1	6	16	22	36.6365	122.978	51.3728	0.564314	2.13329	1.44479	1.3808
NM_153548	E430025E21Rik	232	3712	4018	10.7	22	2	11	5	58	1	20	6	57	64.9562	24.5293	70.7967	1.69492	0.110597	2.28484	1.36345
NM_001093750	Ptchd1	17	2684	6489	2.12481	11	0	3	0	11	0	11	3	11	46.6165	16.0033	17.8274	2.21914	0.493047	1.53841	1.41687
NM_001172152	Wdr17	87	3960	4138	10.8129	19	0	16	0	39	1	19	16	38	55.4467	58.774	42.4086	1.46004	1.36478	1.53744	1.45409
NM_025998	Nkain1	154	778	2553	4.03457	0	0	3	0	7	0	0	3	7	1	68.3989	48.4876	-3.72141	2.19255	2.48883	0.319992
NM_001035226	Xpo1	200	3416	4906	27.1513	22	3	19	4	80	1	19	15	79	66.774	66.3572	106.177	1.15707	0.971137	2.15346	1.42722
NM_011546	Zeb1	50	3404	5806	3.81962	8	1	12	2	26	2	7	10	24	23.5887	42.4179	30.929	0.872579	1.53707	1.88227	1.43064
NM_009782	Cacna1e	1	6823	12697	83.4434	103	9	70	15	219	8	94	55	211	155.735	114.7	133.687	1.6823	1.06714	1.62244	1.45729
NM_001165902	Ctnnb1	87	2433	3423	229.858	41	2	36	7	158	2	39	29	156	187.891	175.866	287.418	1.3245	1.05782	1.94749	1.44327
NM_001080706	Btaf1	309	5856	8509	5.8909	27	0	15	0	36	0	27	15	36	55.0143	38.4721	28.0519	1.82551	1.12858	1.40823	1.45411
NM_021539	Wsb2	156	1371	2408	52.3526	12	1	9	0	32	0	11	9	32	102.326	105.385	113.839	1.36557	1.2329	1.74907	1.44918
NM_007873	Doc2b	167	1406	5068	26.2627	10	2	8	1	23	0	8	7	23	72.9774	80.3784	80.2369	1.30588	1.26825	1.77492	1.44968
NM_146152	Ipo13	628	3520	3588	14.6041	12	1	13	2	56	1	11	11	55	42.9897	54.1137	82.2019	0.906474	1.05994	2.26112	1.40918
NM_021537	Stk25	237	1518	3254	91.8384	27	1	10	3	43	2	26	7	41	229.4	77.743	138.341	2.18161	0.446842	1.5981	1.40885
NM_011215	Ptprn2	145	3151	4688	128.176	42	5	42	5	126	4	37	37	122	139.118	175.116	175.424	1.25323	1.41243	1.68433	1.45
NM_009072	Rock2	212	4379	8012	64.9046	42	6	46	4	112	1	36	42	111	97.6447	143.396	115.138	1.16469	1.54448	1.60016	1.43644
NM_026174	Entpd4	239	2081	3084	43.6614	22	1	12	3	44	0	21	9	44	128.854	69.5129	103.248	1.81076	0.744725	1.74779	1.43442
NM_027498	Sik3	38	4148	6287	26.8827	32	1	23	2	73	0	31	21	73	85.249	72.6926	76.7712	1.51564	1.10883	1.69328	1.43925
NM_010058	Dmwd	70	2068	2520	24.7471	11	0	12	0	36	0	11	12	36	62.2253	85.4473	77.8797	1.1128	1.39319	1.77761	1.42787
NM_024473	BC005537	1724	2414	2551	28.0663	7	1	3	0	13	0	6	3	13	98.2815	61.8564	81.4351	1.69414	0.849334	1.74523	1.42957
NM_008155	Gpi1	123	1800	2887	199.99	27	1	29	1	73	2	26	28	71	175.231	237.54	182.996	1.31021	1.5775	1.4032	1.4303
NM_011986	Ncdn	426	2616	3701	853.293	75	6	62	5	218	1	69	57	217	356.102	370.291	428.285	1.4332	1.32178	1.51424	1.42307
NM_011112	Papola	205	2425	4509	14.0519	11	2	13	1	27	0	9	12	27	45.8204	76.9026	52.5688	1.02239	1.59079	1.6458	1.41966
NM_018788	Extl3	664	3424	5978	26.4674	16	0	19	2	51	1	16	17	50	65.521	87.6299	78.303	1.14557	1.38807	1.73375	1.42246
NM_176893	Mink1	189	4116	4886	101.998	50	3	48	4	130	5	47	44	125	135.272	159.406	137.584	1.35451	1.41795	1.50948	1.42731
NM_199308	Mast3	119	4037	5334	55.4569	28	2	35	4	132	4	26	31	128	75.003	112.567	141.209	0.881683	1.29243	2.01561	1.39657
NM_009127	Scd1	300	1368	4837	5.12611	3	0	3	1	12	0	3	2	12	31.7482	26.6423	48.5654	1.11865	0.684387	2.30701	1.37001
NM_175115	Ikzf5	142	1402	4390	5.85783	4	0	5	1	10	0	4	4	10	35.8805	45.165	34.3042	1.2124	1.36345	1.70285	1.42623
NM_026952	Cdk12	63	3840	4846	8.43244	18	5	13	0	42	1	13	13	41	38.9015	48.9676	46.9196	1.10302	1.25503	1.87449	1.41085
NM_172932	Nlgn3	317	2795	3883	51.7488	29	7	26	5	57	3	22	21	54	100.344	120.568	94.1911	1.34455	1.43424	1.48466	1.42115
NM_026033	Gatad1	317	1118	2547	13.2618	5	0	5	1	7	1	5	4	6	70.5516	71.0461	32.377	1.68098	1.51226	0.991059	1.39476
NM_001013749	Tmem151b	278	1964	4851	23.5984	9	0	11	1	29	0	9	10	29	60.3329	84.383	74.346	1.09773	1.40447	1.74717	1.41646
NM_153140	Rab11fip3	200	1535	3271	46.1469	9	1	13	2	36	1	8	11	35	67.7296	117.226	113.319	0.848529	1.46446	1.8395	1.38416
NM_030256	Bcl9l	214	4699	5339	3.84976	18	0	9	2	30	0	18	7	30	45.3607	22.2049	28.9119	1.81105	0.598421	1.77893	1.39613
NM_010240	Ftl1	255	807	970	34.9498	3	0	4	1	16	0	3	3	16	61.4259	77.3205	125.285	0.879999	1.03577	2.19803	1.37127
NM_001081678	Zfp800	180	2169	3895	4.83289	9	0	3	0	17	1	9	3	16	51.142	21.4585	34.7698	1.84302	0.408602	1.87021	1.37394
NM_030732	Tbl1xr1	415	1960	8127	23.8608	14	2	8	0	21	0	12	8	21	87.7854	73.6672	58.75	1.63191	1.20171	1.399	1.41087
NM_001003912	Arhgef11	10	4669	5600	20.7333	29	5	23	2	88	1	24	21	87	58.2221	64.1267	80.7131	1.12665	1.0884	1.96526	1.39344
NM_011625	Ppp1r13b	185	3449	4333	23.2707	26	2	19	4	51	0	24	15	51	83.1057	65.3813	67.5363	1.56841	1.04503	1.61933	1.41092
NM_001105246	Pcdh19	1729	5023	10151	16.6841	12	2	17	0	61	1	10	17	60	34.312	73.424	78.7309	0.498596	1.41795	2.09648	1.33767
NM_145155	Wasf3	431	1937	2685	12.1451	11	2	5	2	23	0	9	3	23	67.5441	28.3406	66.0116	1.67269	0.240709	2.08646	1.33329
NM_172768	Gramd1b	94	2731	2814	51.0553	35	1	14	3	72	1	34	11	71	145.726	59.3465	116.377	1.89123	0.419968	1.80017	1.37046
NM_027937	Caskin1	187	4483	6176	20.0847	25	1	22	2	72	2	24	20	70	63.1417	66.2336	70.4289	1.2634	1.15467	1.79306	1.40371
NM_001100449	Taf4b	350	2918	5149	1.54392	5	0	5	0	8	0	5	5	8	22.0062	27.7005	13.4652	1.33433	1.48186	1.37914	1.39844
NM_019426	Atf7ip	120	4041	4527	10.8321	24	1	13	1	41	2	23	12	39	66.298	43.5409	42.9917	1.71681	0.930885	1.55578	1.40116
NM_178723	Zfp385b	460	1909	3212	5.25093	4	1	6	0	10	0	3	6	10	23.4004	58.9109	29.8297	0.66358	1.81434	1.58532	1.35442
NM_175356	Pi4kb	383	2789	3786	17.6743	19	5	9	2	46	1	14	7	45	65.7661	41.3919	80.8415	1.40146	0.555428	2.09031	1.34907
NM_010595	Kcna1	2077	3565	8970	29.8073	10	0	13	0	18	1	10	13	17	75.9568	124.295	49.3814	1.28507	1.81893	0.97726	1.36042
NM_001166644	Zfp651	190	2380	6353	10.1651	9	0	9	3	31	1	9	6	30	46.4481	38.978	59.2099	1.24289	0.810431	2.06643	1.37325
NM_201637	Chd8	0	7749	8190	14.6662	42	3	31	6	132	8	39	25	124	56.8838	45.8994	69.1661	1.30787	0.819799	2.00875	1.37881
NM_001272064	Trim24	300	3354	6089	4.94274	14	0	7	2	23	0	14	5	23	51.8118	23.2924	32.5519	1.84785	0.513028	1.75783	1.3729
NM_212438	Wiz	58	2929	3903	3.05184	9	0	5	0	17	1	9	5	16	35.4306	24.777	24.0882	1.59869	0.900023	1.69421	1.39764
NM_008624	Mras	420	1047	4032	81.1793	8	0	8	3	19	1	8	5	18	144.209	113.453	124.086	1.58843	1.06836	1.53608	1.39762
NM_007923	Elk4	345	1638	3671	5.39768	6	0	2	0	11	0	6	2	11	52.4472	22.0062	36.7715	1.81082	0.376689	1.86597	1.35116
NM_009652	Akt1	370	1813	2690	28.7402	10	0	8	3	36	0	10	5	36	78.3255	49.2965	107.833	1.35199	0.507239	2.13206	1.33043
NM_001013753	Pcdh17	2532	6006	9509	18.4001	29	1	15	4	48	0	28	11	48	91.0957	45.048	59.7212	1.84653	0.652682	1.62251	1.37391
NM_057171	Bag6	307	3772	3858	46.1282	26	1	27	6	101	2	25	21	99	81.5467	86.2241	123.495	1.11662	1.02158	1.96386	1.36736
NM_001081388	Rimbp2	726	3966	7001	15.0863	16	1	14	2	52	2	15	12	50	52.3258	52.6925	66.7025	1.16985	1.00148	1.93471	1.36868
NM_001033225	Pnrc1	390	1284	1925	20.7698	6	0	3	0	16	0	6	3	16	75.8548	47.7415	77.357	1.50724	0.661632	1.90263	1.35717
NM_009179	St3gal2	1195	2248	4470	11.3129	4	1	6	1	14	1	3	5	13	32.2005	67.5545	53.362	0.647979	1.53773	1.83413	1.33995
NM_027994	Cand1	347	4040	8209	37.4996	24	1	32	6	80	0	23	26	80	70.3912	100.163	93.6328	1.03286	1.3657	1.72376	1.37411
NM_133766	Efr3a	196	2656	5210	56.7958	23	2	24	5	66	1	21	19	65	96.4837	109.883	114.208	1.23022	1.24288	1.69109	1.38806
NM_178602	Polr2m	187	1288	2248	37.2602	8	1	9	0	20	0	7	9	20	71.8589	116.297	78.5163	1.06661	1.58512	1.47466	1.37546
NM_001290535	Ogt	68	3179	5200	52.5537	39	7	26	4	69	3	32	22	66	116.257	100.609	91.6983	1.54734	1.16362	1.43409	1.38168
NM_178164	Ptbp3	268	1840	6855	5.91773	7	0	7	1	7	1	7	6	6	50.3286	54.3014	16.4974	1.69427	1.62295	0.63888	1.3187
NM_175255	Sec24a	661	3934	6798	1.72581	4	0	8	0	14	1	4	8	13	13.8129	34.7742	17.1678	0.593341	1.74116	1.64397	1.32616
NM_028904	Rmi1	311	2162	3522	4.63918	6	0	6	1	12	1	6	5	11	36.6365	38.4305	25.6864	1.38718	1.27458	1.46484	1.37553
NM_001170556	Prkag2	156	1137	2258	22.6423	6	0	6	1	16	1	6	5	15	69.1277	72.5126	66.0906	1.31971	1.2113	1.60916	1.38006
NM_001170537	Mef2c	578	1979	6427	35.1204	13	1	11	0	17	0	12	11	17	96.8083	111.704	52.4479	1.53326	1.56351	0.938037	1.34494
NM_019921	Akap10	181	2170	3879	12.8997	11	2	9	1	24	0	9	8	24	51.142	57.2226	52.1547	1.23398	1.21719	1.70018	1.38378
NM_025344	Eif3f	17	1103	1507	25.6615	8	1	8	0	12	0	7	8	12	72.8514	104.803	47.7605	1.31775	1.66535	1.04428	1.34246
NM_001081321	Pds5a	147	4146	4146	15.4559	29	1	17	8	63	1	28	9	62	79.1364	32.0187	67.0128	1.75166	0.267844	1.92279	1.3141
NM_183355	Pbx1	665	1958	7163	23.1197	8	0	6	1	25	0	8	5	25	69.9296	55.0154	83.5716	1.3234	0.80001	1.93169	1.3517
NM_177710	Ssh2	28	4300	9040	7.53332	17	1	12	0	41	0	16	12	41	42.331	39.9634	41.483	1.29486	1.03153	1.78353	1.36997
NM_007458	Ap2a1	144	3078	3443	90.0152	38	4	32	3	80	0	34	29	80	130.975	140.621	117.855	1.38547	1.31426	1.38229	1.36067
NM_011844	Mgll	180	1092	3676	23.5899	4	0	7	1	16	1	4	6	15	49.5718	93.5985	71.0909	0.814531	1.55422	1.68285	1.35054
NM_172536	Zfp609	226	4468	8585	3.89839	14	3	11	0	25	0	11	11	25	29.3084	36.8922	25.4734	1.17313	1.32311	1.58661	1.36095
NM_027491	Rragd	465	1665	5047	15.1539	5	0	6	0	15	0	5	6	15	47.0932	71.1349	54.0291	1.01508	1.43168	1.62726	1.35801
NM_177078	Adrbk2	59	2126	6561	10.5818	9	1	10	2	23	1	8	8	22	43.7441	55.0633	46.0044	1.13143	1.28404	1.67147	1.36231
NM_207209	Sec24b	239	3995	4702	12.5733	14	3	16	1	59	1	11	15	58	33.1007	56.817	66.7452	0.622229	1.22276	2.07575	1.30691
NM_001081203	Sbno1	68	4244	10071	31.1177	33	3	30	6	75	3	30	24	72	81.1952	81.7642	74.5228	1.35459	1.18813	1.53789	1.3602
NM_010472	Agfg1	263	1943	7886	8.48857	4	2	9	0	20	0	2	9	20	13.4552	76.2159	51.4562	-0.432755	1.8892	2.00255	1.153
NM_011669	Usp12	294	1407	4274	12.4877	6	0	5	0	9	0	6	5	9	60.9292	63.9127	34.9514	1.50674	1.39676	1.1477	1.3504
NM_145436	Cdc27	231	2709	5783	15.2291	16	0	11	3	32	1	16	8	31	72.9774	45.9305	54.0727	1.64394	0.797513	1.62462	1.35536
NM_080855	Zcchc14	32	2903	6476	21.2609	19	0	14	1	41	1	19	13	40	74.798	64.4203	60.2205	1.4725	1.07946	1.52338	1.35845
NM_018872	Tmem131	182	5816	6548	12.5276	37	7	26	5	57	0	30	21	57	60.183	53.0292	43.7296	1.48698	1.12547	1.4685	1.36032
NM_009769	Klf5	304	1645	1728	1.90327	3	1	2	0	8	0	2	2	8	16.8566	21.2185	25.7857	0.819927	0.968008	2.15557	1.3145
NM_001042528	Cacna1b	105	7089	9772	23.427	46	3	39	2	104	2	43	37	102	69.5879	75.372	63.1267	1.30815	1.24605	1.51677	1.35699
NM_001135559	Sos2	251	4250	5612	6.69737	13	0	11	2	46	3	13	9	43	36.7419	32.0187	46.4766	1.16354	0.784426	2.03797	1.32864
NM_029654	Atg2b	411	6639	10173	15.6482	33	2	23	6	117	5	31	17	112	56.2578	38.8341	77.7297	1.2517	0.538612	2.12731	1.30587
NM_001081149	Kat6a	494	6506	9126	11.8947	29	3	23	4	81	2	26	19	79	48.8792	44.9622	56.797	1.21901	0.919421	1.88557	1.34134
NM_009208	Slc4a3	216	3900	4441	28.5452	26	1	19	1	70	1	25	18	69	76.6991	69.5129	80.9556	1.32594	1.00724	1.72369	1.35229
NM_026666	Ubn1	867	4275	6455	15.8352	21	2	16	2	40	0	19	14	40	63.0121	58.4442	50.7315	1.40791	1.12101	1.50259	1.34384
NM_001004182	Tmem178b	91	511	3092	19.568	1	0	3	0	7	0	1	3	7	26.9104	101.621	72.0387	0.0491368	1.78834	1.84571	1.22773
NM_001003909	Ankib1	611	3869	6626	15.3204	13	3	22	3	44	1	10	19	43	34.6911	82.9689	57.0473	0.567349	1.64694	1.69728	1.30386
NM_001004761	Gpr158	689	4292	7143	42.2165	34	4	27	3	70	1	30	24	69	94.108	94.7675	82.7756	1.37828	1.21262	1.45483	1.34858
NM_177038	Trappc8	11	4325	5178	22.9421	31	2	23	1	61	5	29	22	56	75.9779	72.553	56.1081	1.44787	1.20397	1.36281	1.33822
NM_182929	Rims3	0	924	977	6.38208	4	0	4	0	3	0	4	4	3	48.928	61.5886	14.0335	1.60669	1.75796	0.347424	1.23736
NM_019461	Usp27x	969	2286	3240	5.49029	2	0	4	0	14	0	2	4	14	17.1638	43.2103	45.9473	0.188767	1.33965	2.17427	1.23423
NM_007664	Cdh2	852	3573	4843	20.6015	19	3	14	2	43	2	16	12	41	66.4601	62.743	65.1287	1.32153	1.06087	1.66065	1.34768
NM_009513	Nrsn1	232	823	2137	9.42986	5	0	2	0	4	2	5	2	2	95.6207	48.1454	14.6272	2.33117	1.16155	0.106981	1.1999
NM_029888	Zfp142	499	5722	6174	3.93797	18	0	11	3	36	0	18	8	36	38.9513	21.7913	29.792	1.57722	0.5573	1.80477	1.3131
NM_009271	Src	384	2010	3887	35.2713	15	0	9	1	29	0	15	8	29	104.265	69.9974	77.0894	1.63766	0.886562	1.49039	1.3382
NM_001017985	C2cd3	210	7182	7813	5.84756	24	4	18	5	79	1	20	13	78	32.4222	26.5276	48.3565	1.06727	0.596826	2.19952	1.28787
NM_001004436	Wapl	455	4058	6351	23.9215	25	3	18	3	68	2	22	15	66	69.0125	59.2297	79.1766	1.28321	0.885436	1.82753	1.33206
NM_001256082	Myo7a	122	6641	7214	4.36636	20	0	16	1	42	1	20	15	41	34.6752	32.7358	27.1844	1.34539	1.08063	1.59322	1.33975
NM_001286944	Jund	1462	2344	2877	23.9996	5	1	10	1	7	0	4	9	7	51.2579	145.173	34.3042	0.852104	2.17681	0.618333	1.21575
NM_175091	Tnks	25	3988	6444	23.4977	20	2	23	2	77	5	18	21	72	51.3355	75.389	78.5282	0.867398	1.24451	1.82941	1.31377
NM_029432	4930402H24Rik	99	3639	6639	11.5355	10	1	17	1	47	1	9	16	46	28.7348	64.3027	56.1658	0.471611	1.45453	1.89303	1.27306
NM_139311	Mllt6	160	3400	7271	7.38447	10	2	14	1	29	1	8	13	28	27.9071	57.0836	37.3534	0.706155	1.55826	1.6476	1.304
NM_001081355	Prdm2	160	5290	7308	11.3257	27	4	24	2	45	1	23	22	44	50.6734	61.0124	37.0726	1.30142	1.39009	1.3078	1.33311
NM_010162	Ext1	820	3061	3464	16.4018	15	0	7	0	31	2	15	7	29	75.6518	44.4395	55.9337	1.64984	0.704077	1.61639	1.32344
NM_153402	Ago3	256	2839	7635	4.76768	5	1	10	0	18	0	4	10	18	17.5027	55.0793	30.1207	0.30452	1.77696	1.67357	1.25168
NM_177263	Zhx3	456	3312	4480	17.4754	15	2	14	1	42	1	13	13	41	51.4464	64.7586	62.0502	1.05421	1.20814	1.71735	1.32657
NM_207225	Hdac4	301	3532	8100	7.71856	15	0	7	0	31	1	15	7	30	52.4716	30.8229	40.133	1.58961	0.641852	1.71712	1.31619
NM_146003	Senp6	621	4020	4938	19.1335	14	4	22	2	57	0	10	20	57	33.2521	83.7127	72.4838	0.368346	1.52252	1.87187	1.25425
NM_010772	Maz	60	1494	2374	18.6539	7	1	8	1	22	0	6	7	22	47.2903	69.4483	66.3118	0.892193	1.2687	1.763	1.30796
NM_152809	Csnk1g3	734	2009	4394	17.9668	9	0	5	0	14	0	9	5	14	79.7815	55.7921	47.4608	1.66998	0.975999	1.30933	1.31844
NM_145421	Abhd17a	351	1284	1473	38.6697	11	0	2	1	30	0	11	1	30	133.254	15.2486	138.981	1.93451	-1.36888	2.26994	0.94519
NM_001195633	Epg5	33	7752	9672	10.9315	36	3	24	3	101	2	33	21	99	48.3195	38.7053	55.436	1.25478	0.755403	1.91552	1.30857
NM_175537	Zbtb38	484	4078	4091	24.5846	25	5	22	5	66	2	20	17	64	62.8958	67.2951	76.9696	1.13235	1.05273	1.76572	1.31693
NM_011417	Smarca4	260	5105	6367	37.772	41	2	27	4	110	4	39	23	106	90.9788	67.5378	94.5648	1.39851	0.792643	1.73248	1.30788
NM_021361	Nova1	24	1548	7000	7.30833	6	0	6	0	8	0	6	6	8	44.4975	56.0117	22.6894	1.38568	1.53731	0.936345	1.28645
NM_001290634	Ugp2	267	1761	2657	17.7915	8	1	4	0	31	0	7	4	31	52.9562	38.091	89.6868	1.08482	0.431447	2.23503	1.25043
NM_145999	Rhot2	415	2278	2808	14.9354	7	1	9	0	27	1	6	9	26	36.4006	68.7294	60.3223	0.65253	1.39102	1.79739	1.28031
NM_145926	Mgat4b	308	1955	2429	13.9572	5	0	8	0	23	1	5	8	22	34.312	69.1049	57.736	0.609305	1.44072	1.78626	1.27876
NM_001301737	Dnm1	120	2676	3285	418.394	63	2	52	4	141	8	61	48	133	269.736	267.173	224.91	1.47457	1.29113	1.13308	1.29959
NM_009322	Tbr1	255	2301	3977	9.08877	12	1	4	1	27	2	11	3	25	60.7654	20.8607	52.8143	1.69995	-0.0223081	1.98759	1.22174
NM_007682	Cenpb	191	1991	2779	17.9926	4	0	12	1	32	1	4	11	31	25.1164	86.9426	74.44	0.00167157	1.61512	1.95757	1.19145
NM_176976	Cep295	45	7188	7371	3.29912	25	3	15	2	38	2	22	13	36	34.8106	25.8926	21.7841	1.52489	0.915432	1.48925	1.30986
NM_001033253	Plekhg1	166	4339	7190	7.15393	15	0	15	4	37	0	15	11	37	40.6268	37.5022	38.324	1.26763	0.97175	1.709	1.31613
NM_146122	Dennd1a	255	3306	4352	7.64997	12	0	11	0	19	0	12	11	19	44.4538	51.2936	26.9171	1.35592	1.38214	1.14772	1.29526
NM_001045536	Zzef1	71	8747	11150	10.0663	36	3	32	3	93	2	33	29	91	42.9897	47.5544	45.3356	1.13732	1.10338	1.68875	1.30982
NM_011602	Tln1	487	8113	8560	1.01888	7	1	10	0	34	1	6	10	33	8.8925	18.6559	18.704	0.284914	1.16831	2.17288	1.2087
NM_001081336	Dgkh	0	3471	3967	30.6319	25	2	27	2	46	2	23	25	44	74.8933	102.47	54.7918	1.24779	1.52351	1.10627	1.29252
NM_198093	Elmo1	301	1045	4099	6.04164	4	0	2	0	4	1	4	2	3	60.7654	38.2446	17.4287	1.95328	1.10442	0.70217	1.25329
NM_021531	Carm1	114	1941	3220	9.35665	11	0	3	2	29	0	11	1	29	68.0493	7.78707	68.6083	1.84526	-1.46188	2.34271	0.908695
NM_001167777	Asxl3	404	7019	11697	1.39163	14	0	8	3	30	0	14	5	30	23.9204	10.7536	19.6024	1.51908	0.180911	2.0008	1.2336
NM_007788	Csnk2a1	261	1437	4205	59.5582	16	1	5	1	37	1	15	4	36	144.163	48.3911	132.316	1.7801	0.0303896	1.86689	1.2258
NM_021895	Actn4	97	2836	3811	7.17697	12	0	6	1	26	0	12	5	26	49.5175	25.9711	41.0297	1.55114	0.439696	1.80495	1.26526
NM_023598	Arid5b	16	3583	4494	7.6402	12	1	12	1	34	1	11	11	33	34.8545	43.8735	39.9879	1.00575	1.1575	1.71974	1.29433
NM_147176	Homer1	803	1904	4804	58.0987	18	2	8	2	21	1	16	6	20	164.249	77.5312	78.5163	1.98368	0.725752	1.13305	1.28083
NM_001081423	Ttll5	235	4222	4841	3.86021	11	0	8	0	26	1	11	8	25	31.1829	28.5467	27.1026	1.26868	0.959196	1.68362	1.30383
NM_031179	Sf3b1	112	4027	6192	52.5749	31	3	36	4	87	1	28	32	86	80.8343	116.287	94.9476	1.02281	1.3723	1.48402	1.29304
NM_010243	Fut9	510	1590	11990	17.3018	14	3	2	0	13	0	11	2	13	115.117	26.3463	52.028	2.22235	-0.0831667	1.47088	1.20336
NM_177267	Dcaf5	203	3044	5707	21.6613	14	1	13	0	50	1	13	13	49	51.718	65.1006	74.5491	0.928589	1.08309	1.81697	1.27622
NM_010733	Lrrn3	842	2966	3491	39.8912	16	1	15	3	47	0	15	12	47	79.819	80.3784	95.6447	1.17585	1.01004	1.70688	1.29759
NM_053076	Rtn3	208	922	2857	229.391	14	2	10	1	35	1	12	9	34	189.956	179.332	205.825	1.34153	1.08723	1.46732	1.29869
NM_001122758	Pcdh7	1024	4792	8676	24.4235	31	1	19	2	47	1	30	17	46	89.987	64.1875	52.7672	1.65319	0.98858	1.22613	1.2893
NM_026908	Cab39l	285	1299	3037	5.93844	3	1	2	0	13	0	2	2	13	22.2926	28.0611	55.4144	0.517288	0.668375	2.38421	1.18996
NM_178803	Aebp2	412	1237	5932	10.135	5	0	1	0	11	0	5	1	11	68.4992	17.2448	57.631	1.8052	-0.364232	2.02972	1.1569
NM_030695	Lrba	285	8850	9883	5.8195	29	3	22	3	75	1	26	19	74	34.3096	31.5601	37.3441	1.15188	0.850405	1.83039	1.27756
NM_021506	Sh3rf1	270	2946	5181	17.7321	14	1	15	5	42	1	13	10	41	54.9069	53.1651	66.224	1.13908	0.914541	1.80005	1.28456
NM_001271727	Trim2	503	2738	7396	111.658	25	2	25	3	80	0	23	22	80	116.311	140.042	154.714	1.0805	1.17521	1.60919	1.2883
NM_009048	Reps1	23	2411	2618	10.2626	13	2	7	0	24	1	11	7	23	52.0629	41.7039	41.6304	1.4016	0.902053	1.55089	1.28485
NM_178277	Hmgxb3	474	4335	5198	17.2677	20	2	19	1	50	2	18	18	48	52.6917	66.3262	53.7352	1.09613	1.25004	1.51898	1.28838
NM_008845	Pip4k2a	126	1344	3471	9.06751	5	0	4	0	10	0	5	4	10	46.3973	46.7224	35.4871	1.31219	1.14247	1.41576	1.29014
NM_001081270	Dscaml1	0	6336	6885	14.4295	33	1	29	2	63	1	32	27	62	57.0827	60.6263	42.2955	1.323	1.23132	1.3117	1.28867
NM_172632	Mapk4	950	2702	4614	20.6709	3	0	15	0	27	0	3	15	27	19.3534	121.806	66.6112	-0.460459	2.01585	1.69054	1.08198
NM_175551	Dido1	329	7100	8476	10.4278	33	5	25	4	75	3	28	21	72	46.7385	44.1244	45.9618	1.23605	0.973585	1.68141	1.29701
NM_013767	Csnk1e	142	1393	2760	20.8516	8	0	5	0	18	1	8	5	17	72.2774	56.8624	58.7366	1.4351	0.911433	1.50234	1.28296
NM_008131	Glul	144	1266	2807	156.859	10	2	20	5	62	3	8	15	59	80.5873	190.2	227.288	0.340274	1.4069	1.90272	1.21663
NM_001161854	Csde1	548	2852	4105	126.343	32	6	30	6	85	2	26	24	83	127.544	148.198	155.709	1.13686	1.18055	1.52342	1.28028
NM_001290788	Aqr	173	4376	4414	10.366	25	3	15	1	31	0	22	14	31	59.1606	47.3894	31.8801	1.57977	1.08025	1.1582	1.27274
NM_080793	Setd7	266	1367	7356	30.8314	6	0	6	1	25	0	6	5	25	61.5933	64.6093	98.1454	0.961705	0.854109	1.94223	1.25268
NM_001081340	Setd2	82	7696	8350	24.9755	57	6	35	4	124	3	51	31	121	75.7054	57.9244	68.6894	1.39	0.826652	1.58939	1.26868
NM_010302	Gna12	135	1275	1880	6.9792	3	0	7	3	9	0	3	4	9	29.7431	49.9192	34.1236	0.833093	1.39964	1.56054	1.26442
NM_008981	Ptprg	695	5024	9190	19.2231	20	2	26	2	56	0	18	24	56	46.9953	78.8744	55.9136	0.864519	1.43375	1.49381	1.26403
NM_001252520	Picalm	341	2309	4159	40.9204	20	4	15	2	33	1	16	13	32	91.8892	93.979	70.2817	1.36321	1.21983	1.24276	1.27527
NM_133789	Strn4	464	2747	3535	101.672	21	1	26	3	81	2	20	23	79	99.0133	143.329	149.568	0.90633	1.26655	1.63244	1.26844
NM_009429	Tpt1	173	692	894	202.408	11	3	7	1	25	1	8	6	24	174.218	164.474	199.876	1.29439	1.03976	1.52125	1.28513
NM_172449	Bzrap1	861	6402	7616	15.7481	28	3	30	3	58	0	25	27	58	50.9943	69.3247	45.2436	1.10603	1.37073	1.34166	1.27281
NM_001290421	Flna	2073	8040	8369	1.33937	8	2	12	5	33	1	6	7	32	11.3649	16.6899	23.1799	0.469173	0.838719	2.27208	1.19333
NM_001097623	Trerf1	639	4317	4544	4.51325	13	0	8	1	23	1	13	7	22	39.9486	27.0769	25.854	1.52911	0.786386	1.49538	1.27029
NM_172865	Manea	94	1483	4628	10.3778	3	1	8	2	20	0	2	6	20	16.2741	61.4556	62.2365	-0.283002	1.45452	2.12243	1.09798
NM_018798	Ubqln2	222	2139	3331	59.0176	19	3	16	3	50	1	16	13	49	94.3338	96.4792	110.482	1.17391	1.0315	1.61373	1.27304
NM_001290345	Map4k3	136	2821	4156	37.6223	23	1	15	2	51	0	22	13	51	92.6079	68.8829	82.1	1.42658	0.823548	1.53161	1.26058
NM_001289702	Pde4dip	37	7276	8260	60.0049	67	4	60	8	173	1	63	52	172	98.363	102.197	102.699	1.22395	1.10431	1.49558	1.27462
NM_001081378	Kidins220	164	5546	7402	91.0909	57	9	53	5	178	3	48	48	175	100.802	126.885	140.544	1.00033	1.15863	1.62717	1.26204
NM_001291068	Polr2a	410	6323	6736	25.7315	46	1	26	4	94	2	45	22	92	86.015	52.9331	67.2508	1.55569	0.678231	1.53592	1.25661
NM_013876	Rnf11	273	738	2132	48.8445	7	0	2	0	8	1	7	2	7	170.143	61.1913	65.0672	2.14218	0.491476	0.995416	1.20969
NM_054051	Pip4k2b	100	1351	5053	34.8129	8	0	9	0	18	0	8	9	18	72.2774	102.352	62.1917	1.11713	1.44282	1.19064	1.25019
NM_001085495	Arfgef2	134	5513	8777	11.552	30	2	14	2	66	2	28	12	64	58.8337	31.7389	51.4275	1.50457	0.435021	1.76478	1.23479
NM_001122893	Fyn	513	2127	3536	29.1222	9	1	11	1	27	0	8	10	27	56.0217	88.1473	72.3065	0.860297	1.33751	1.5453	1.2477
NM_018744	Sema6a	669	3765	6894	2.2978	7	0	6	2	16	0	7	4	16	25.5545	18.3811	22.3376	1.30332	0.644547	1.8036	1.25049
NM_177338	Hmbox1	328	1588	2931	4.94397	6	0	2	0	7	0	6	2	7	53.8208	22.5825	24.0129	1.90258	0.468223	1.31871	1.22984
NM_183016	Cdc42bpb	447	5589	6718	40.2676	31	6	39	4	127	7	25	35	120	54.9512	96.8386	100.871	0.631439	1.27301	1.77642	1.22695
NM_019472	Myo10	460	6649	8098	2.12385	11	1	15	4	29	0	10	11	29	18.262	25.2863	20.2533	0.867431	1.15331	1.72282	1.24785
NM_001177616	Arpp21	379	2749	3423	49.1363	15	2	19	1	60	1	13	18	59	61.9961	108.053	107.602	0.681982	1.30814	1.71654	1.23555
NM_019654	Socs5	442	2053	4394	15.0382	7	0	9	2	21	3	7	7	18	49.1102	61.818	48.2941	1.08034	1.23388	1.47127	1.26183
NM_175238	Rif1	43	7324	8502	6.13249	27	0	19	5	60	1	27	14	59	41.9124	27.3558	35.025	1.40815	0.611788	1.69761	1.23918
NM_001024205	Nufip2	89	2168	10399	16.865	14	1	7	0	24	0	13	7	24	70.6738	47.9023	49.897	1.53437	0.795126	1.43021	1.25323
NM_207255	Zfp532	405	3516	5503	38.0901	30	0	18	1	46	2	30	17	44	108.991	77.743	61.1322	1.65391	0.990481	1.09666	1.24702
NM_001040611	Peg10	370	1501	6667	1.73415	1	0	2	0	6	0	1	2	6	9.99326	25.1582	22.9301	0.123367	1.2712	2.0578	1.15079
NM_177782	Prex1	114	5067	6530	16.0295	25	2	19	5	80	0	23	14	80	52.4843	40.2135	69.8134	1.1366	0.574101	1.95384	1.22151
NM_198168	Ppp2r5b	597	2091	2708	35.9441	13	1	8	0	24	0	12	8	24	90.7821	76.1819	69.4349	1.42616	0.997039	1.32499	1.24939
NM_001081079	Ogfrl1	124	1519	4844	23.2589	9	0	7	0	16	0	9	7	16	72.9185	71.3898	49.575	1.38006	1.17219	1.17367	1.24198
NM_001081056	Xpot	286	3175	5989	24.8673	23	2	9	1	58	4	21	8	54	82.1564	39.3963	80.7911	1.51067	0.273224	1.82684	1.20358
NM_001037764	Rai1	305	5975	7125	10.8583	28	4	21	6	67	1	24	15	66	47.8407	37.6375	50.3128	1.24458	0.71919	1.78079	1.24819
NM_024244	Fam13c	104	1910	3279	8.99937	6	1	6	0	19	0	5	6	19	31.2912	47.2657	45.473	0.748586	1.16381	1.77927	1.23056
NM_031256	Plekha3	280	1174	3007	4.83367	4	1	2	0	5	0	3	2	5	37.9274	31.8277	24.1741	1.41166	0.977237	1.34571	1.24487
NM_022997	Vps35	40	2431	3169	123.55	39	7	21	4	97	3	32	17	94	151.266	101.154	169.928	1.39681	0.643379	1.66668	1.23562
NM_183315	Ctxn1	242	491	1226	46.0481	1	0	3	0	4	0	1	3	4	45.3911	171.409	69.4349	0.272481	2.01394	1.13448	1.1403
NM_026605	Sympk	149	4016	4121	20.12	16	0	21	2	57	0	16	19	57	46.7644	69.9024	63.7115	0.829124	1.23136	1.6471	1.23586
NM_001205241	Kat6b	301	5593	7198	6.70365	20	0	13	0	38	0	20	13	38	42.7149	34.9491	31.0371	1.38027	0.910188	1.45474	1.2484
NM_001286575	Ehmt2	7	3628	3859	53.8427	24	0	31	5	93	3	24	26	90	74.9122	102.154	107.431	0.898261	1.17065	1.64391	1.23761
NM_001033443	Cdkl4	167	1196	2931	15.3255	9	0	3	1	11	0	9	2	11	98.8546	27.652	46.2056	2.07788	0.0615487	1.39294	1.17746
NM_001284503	Cask	490	3271	8362	16.2001	16	0	10	0	30	0	16	10	30	65.0262	51.1578	46.627	1.43916	0.914831	1.36335	1.23912
NM_183221	Fat4	20	14966	16109	11.5892	76	5	50	9	163	3	71	41	160	53.6912	39.0276	46.2714	1.37061	0.731272	1.60988	1.23726
NM_001034013	Asic2	212	1751	2643	12.454	7	3	10	2	17	1	4	8	16	29.3759	73.9544	44.9364	0.455914	1.60896	1.51231	1.19239
NM_001109975	Synpo	529	2602	4479	36.3101	20	1	11	2	36	1	19	9	35	103.591	61.7669	72.977	1.6103	0.688165	1.38897	1.22915
NM_028945	Fam208a	222	4719	7577	16.5015	29	1	18	3	50	1	28	15	49	70.3728	47.4549	47.0967	1.54173	0.79505	1.36364	1.23347
NM_001302886	Prdm4	386	2777	3941	7.86237	9	1	7	1	23	0	8	6	23	37.8164	35.7013	41.5782	1.10563	0.842423	1.75396	1.23401
NM_001164169	Pias2	188	1907	2073	12.155	10	0	6	2	18	0	10	4	18	65.7497	33.1052	45.2599	1.63334	0.464395	1.54134	1.21303
NM_028980	Ppp4r4	55	2683	3683	33.9138	28	0	15	5	38	0	28	10	38	120.421	54.1361	62.4994	1.86983	0.540097	1.21788	1.20927
NM_019490	Uso1	160	3040	3898	27.461	19	3	12	0	56	0	16	12	56	62.791	59.2791	84.0452	1.06131	0.801401	1.80751	1.2234
NM_008071	Gabrb3	103	1525	5568	89.2563	19	3	15	1	30	1	16	14	29	127.172	140.069	88.1487	1.34821	1.31381	0.969805	1.21061
NM_001038612	Olfm1	261	723	1048	187.12	4	2	11	1	21	0	2	10	21	48.928	307.943	196.469	-0.489051	1.99308	1.55684	1.02029
NM_028296	Car10	936	1923	3336	11.5644	9	0	2	0	6	0	9	2	6	103.061	28.8287	26.2755	2.31269	0.295608	0.795132	1.13448
NM_198105	Fam120c	27	3303	7709	16.3522	10	1	13	2	66	1	9	11	65	31.0505	47.7707	85.7604	0.366963	0.810232	2.23532	1.1375
NM_173784	Ubtd2	105	810	3032	6.18571	3	0	1	0	6	0	3	1	6	48.0952	20.1801	36.7857	1.6013	0.167537	1.76173	1.17686
NM_178678	Lrrtm3	542	2291	3852	10.45	5	1	6	0	24	1	4	6	23	25.8488	48.8061	56.8402	0.380215	1.11776	1.98625	1.16141
NM_001128607	Epb41	754	2539	5067	2.647	3	0	5	1	8	0	3	4	8	18.9956	31.8812	19.3718	0.787646	1.35164	1.48929	1.20952
NM_028014	Tmem94	227	4310	4996	7.79988	16	1	11	3	42	0	15	8	42	41.5223	27.8755	44.4618	1.24546	0.490375	1.85684	1.19756
NM_172626	Rbm27	181	3199	6266	11.4164	15	0	10	0	25	1	15	10	24	56.1748	47.1404	34.3724	1.44517	1.01303	1.19257	1.21692
NM_172544	Nrxn3	690	3993	6518	48.7806	30	4	21	6	88	0	26	15	88	88.9681	64.6093	115.157	1.2076	0.570701	1.82002	1.19944
NM_194462	Akap9	257	11597	12105	10.0879	54	6	32	7	132	3	48	25	129	47.8407	31.3646	49.1693	1.29023	0.501614	1.80421	1.19869
NM_015743	Nr4a3	591	2475	5569	5.90343	7	2	6	1	15	1	5	5	14	29.9957	37.7574	32.1192	0.949143	1.10021	1.60194	1.2171
NM_028713	Rftn2	523	2026	3677	2.03006	2	1	4	0	8	1	1	4	7	7.51988	37.8629	20.1306	-0.384616	1.76364	1.74879	1.0426
NM_001099628	Atad2b	356	4739	8102	2.04386	4	0	10	1	23	0	4	9	23	10.3147	29.2135	22.6816	0.0671062	1.3853	1.91571	1.12271
NM_030197	Cacul1	305	1439	5790	12.0379	4	0	3	0	17	1	4	3	16	39.8673	37.6375	60.9852	0.917568	0.655484	1.97901	1.18402
NM_011361	Sgk1	84	1380	2456	19.4051	10	1	5	0	14	1	9	5	13	78.4887	54.888	43.3566	1.59864	0.90486	1.11962	1.20771
NM_028806	Phactr3	452	2129	5100	12.7593	10	2	8	3	18	0	8	5	18	53.9171	42.4179	46.3935	1.317	0.792036	1.53972	1.21625
NM_001114663	Plcl1	442	3733	6555	5.52384	6	3	13	4	41	2	3	9	39	10.303	38.907	51.2217	-0.551321	1.18454	2.32636	0.986527
NM_001136085	Uba1	230	3407	4073	143.468	43	5	39	8	126	5	38	31	121	135.187	138.822	164.621	1.14197	1.00774	1.50597	1.21856
NM_001252200	Map4k4	317	4184	5782	21.3456	13	3	18	4	100	2	10	14	98	29.2278	51.507	109.539	0.11437	0.754263	2.38345	1.08403
NM_021458	Fzd3	463	2464	12742	15.8935	13	2	5	1	33	1	11	4	32	62.132	28.4397	69.1226	1.38533	0.0795879	1.94604	1.13699
NM_013931	Mapk8ip3	123	4137	5579	112.653	55	3	39	12	146	7	52	27	139	146.418	95.6972	149.677	1.40711	0.620417	1.55462	1.19405
NM_001195496	Dclk2	714	3030	4092	26.5408	14	4	13	2	45	0	10	11	45	48.8013	67.572	83.983	0.718813	1.01136	1.83265	1.18761
NM_172894	Ppp6r1	476	3047	3793	43.0805	16	2	15	1	68	1	14	14	67	61.5454	77.4709	112.639	0.75305	0.909372	1.88369	1.18204
NM_019883	Uba52	41	428	494	183.087	6	0	3	0	19	0	6	3	19	175.231	110.287	212.207	1.36499	0.52513	1.68477	1.19163
NM_172653	Slc39a10	50	2552	4961	61.1105	30	5	18	3	55	1	25	15	54	112.933	85.2936	93.2876	1.41191	0.832192	1.34288	1.19566
NM_001177630	Etl4	345	4389	5714	12.7033	20	0	11	2	52	1	20	9	51	55.897	31.6624	54.51	1.37176	0.372853	1.7757	1.17344
NM_199009	Fam160a2	365	3293	10853	11.4384	12	0	11	2	33	3	12	9	30	46.3212	43.7305	44.2861	1.16572	0.903506	1.55669	1.20864
NM_012061	Cadps	341	4427	5478	84.2851	41	6	41	8	123	1	35	33	122	96.8143	114.902	129.056	0.990273	1.06348	1.56386	1.20587
NM_012024	Ppp2r5e	573	1977	4810	27.9623	10	0	7	1	20	0	10	6	20	80.5012	60.799	61.5716	1.40854	0.826751	1.34469	1.19333
NM_172741	4931406P16Rik	413	3593	5808	3.69162	4	0	10	1	20	0	4	9	20	14.2168	40.265	27.1844	0.163226	1.48298	1.72231	1.12284
NM_028148	Scaf11	263	4634	7724	15.5684	14	1	21	0	57	2	13	21	55	33.6149	68.352	54.3875	0.51192	1.35743	1.61605	1.1618
NM_145979	Chd4	177	5925	6438	44.3725	45	3	35	2	117	1	42	33	116	82.5852	81.6789	87.2285	1.15895	0.967427	1.49213	1.20617
NM_028262	Setd3	139	1924	2725	66.6187	22	2	12	2	41	0	20	10	41	126.637	79.703	99.2803	1.5236	0.681077	1.36633	1.19034
NM_028288	Cul4b	72	2985	5002	15.3681	16	1	11	0	30	1	15	11	29	58.1997	53.7236	43.0303	1.31186	1.018	1.28809	1.20598
NM_008580	Map3k5	80	4223	5393	9.48609	21	1	12	1	31	0	20	11	31	54.5613	37.7738	32.3418	1.51803	0.807861	1.24716	1.19102
NM_009976	Cst3	135	558	796	84.2401	3	1	7	3	18	2	2	4	16	53.4391	134.534	163.492	0.13328	1.29137	1.9055	1.11005
NM_001110228	Celf2	38	1619	7645	48.3537	13	2	12	5	46	1	11	7	45	78.6376	62.991	123.026	1.03498	0.539534	1.92214	1.16555
NM_001007596	Rtn1	138	765	1551	417.283	11	0	15	0	26	1	11	15	25	198.287	340.358	172.341	1.03227	1.64205	0.751045	1.14179
NM_178279	Pxk	102	1650	2840	5.76383	5	0	3	0	12	0	5	3	12	36.5064	27.5717	33.5064	1.24738	0.661425	1.68134	1.19672
NM_001033713	Mef2a	336	1833	5538	41.823	11	0	10	1	26	0	11	9	26	83.0502	85.5329	75.0704	1.20376	1.0705	1.32108	1.19844
NM_016846	Rgl1	101	2408	3887	31.4301	17	3	12	1	41	0	14	11	41	68.5883	67.8356	76.8163	1.10496	0.912529	1.57394	1.19714
NM_001081011	Srgap2	718	3934	8040	9.6875	16	1	8	1	30	0	15	7	30	52.7163	30.9667	40.3202	1.45537	0.508214	1.54911	1.1709
NM_001008791	Whrn	758	3515	4089	2.77088	4	0	7	0	12	0	4	7	12	16.3981	36.1222	18.8132	0.547134	1.50356	1.4119	1.1542
NM_001024616	Rabl6	204	2382	3155	44.2534	16	0	14	1	42	1	16	13	41	83.0294	84.9177	81.3661	1.16836	1.02519	1.39382	1.19579
NM_148932	Pom121	41	3644	5581	5.50593	8	1	7	1	41	0	7	6	41	21.9585	23.6919	49.1855	0.542414	0.470909	2.27034	1.09455
NM_021493	Arhgap23	341	4175	5450	8.12146	10	1	11	2	48	1	9	9	47	26.5314	33.3967	52.9862	0.574208	0.726122	2.07882	1.12638
NM_177214	Snrnp200	90	6501	6740	38.3558	43	1	40	3	117	2	42	37	115	74.0446	82.1086	77.5335	1.09186	1.06501	1.4342	1.19702
NM_001113351	Synj2	337	3853	3992	32.3784	24	1	17	3	71	1	23	14	70	73.9347	56.6489	86.0531	1.19481	0.634173	1.71489	1.18129
NM_001167918	D830031N03Rik	1204	4552	8311	3.99487	11	1	5	1	25	1	10	4	24	33.7586	16.9976	30.9844	1.36191	0.190018	1.85036	1.13409
NM_001008231	Daam2	193	3541	6045	2.79557	6	1	6	1	24	1	5	5	23	16.8793	21.247	29.6934	0.583359	0.732456	2.06348	1.12643
NM_016707	Bcl11a	335	2657	3425	19.5253	11	0	12	2	30	0	11	10	30	53.5427	61.2704	55.844	1.04301	1.05974	1.48002	1.19426
NM_001164367	Rab11fip2	218	1331	5363	20.3066	6	1	7	0	10	0	5	7	10	50.7744	89.4778	38.8349	0.942086	1.58185	0.925799	1.14991
NM_207583	Brinp2	820	3172	4101	30.2086	17	2	12	3	47	2	15	9	45	72.0815	54.44	82.6975	1.20122	0.619639	1.71085	1.17724
NM_175140	Chst8	452	1706	2397	12.417	4	1	5	0	16	0	3	5	16	27.0392	56.7264	55.1493	0.338178	1.22818	1.81005	1.12547
NM_199239	Sema6d	54	3147	5627	11.5902	12	0	10	1	36	2	12	9	34	43.8501	41.3976	47.5134	1.07846	0.816274	1.64804	1.18092
NM_001080388	Mark2	639	2808	4502	15.3706	8	0	7	0	33	1	8	7	32	41.6869	45.9146	63.7687	0.830346	0.791301	1.85546	1.15904
NM_001031667	Gsk3a	191	1664	2259	49.8041	11	0	9	2	40	2	11	7	38	84.4033	67.6095	111.506	1.11873	0.623358	1.75757	1.16655
NM_011949	Mapk1	245	1322	5099	165.912	25	3	8	1	38	0	22	7	38	230.875	92.4687	152.505	1.82395	0.33176	1.28391	1.14654
NM_145991	Cdc73	269	1865	7110	3.34255	6	0	2	0	7	0	6	2	7	42.4901	17.8283	18.9576	1.80438	0.368982	1.27869	1.15068
NM_001290700	Zfp451	237	1917	2077	13.3631	9	3	12	2	12	2	6	10	10	40.3656	84.6844	25.7281	0.870705	1.7609	0.653589	1.09506
NM_172443	Tbc1d16	162	2463	6988	5.81553	4	0	9	3	21	0	4	6	21	19.6478	37.0977	39.4475	0.348059	1.08405	1.90997	1.11403
NM_007930	Enc1	438	2208	4743	286.313	29	2	28	2	85	2	27	26	83	172.409	208.984	202.685	1.06419	1.17107	1.27469	1.16998
NM_172525	Arhgap29	111	3912	5091	2.07956	3	0	8	1	23	1	3	7	22	8.92058	26.2007	25.0174	-0.153133	1.21758	2.04381	1.03608
NM_001109873	Cbfa2t3	340	2098	7669	1.74492	4	0	1	0	9	0	4	1	9	25.7164	8.09271	22.1279	1.48319	-0.36896	2.00166	1.03863
NM_013885	Clic4	171	933	4065	4.50505	1	0	2	0	6	0	1	2	6	14.8325	37.3411	34.0341	0.100855	1.25121	1.89337	1.08181
NM_170779	Wwc1	0	3315	3315	16.0258	10	1	19	3	44	1	9	16	43	30.6852	68.6672	56.0663	0.362395	1.34618	1.63764	1.11541
NM_001195004	Kat7	197	1943	5876	17.4693	7	1	10	1	20	0	6	9	20	38.8398	73.3349	49.5112	0.648886	1.38779	1.39194	1.14287
NM_020253	Nrxn2	479	5015	6084	34.5455	28	3	31	5	82	3	25	26	79	62.2926	81.5479	75.2786	0.907431	1.11975	1.47208	1.16642
NM_011814	Fxr2	347	2372	2970	40.5761	11	1	16	1	38	2	10	15	36	55.8142	105.385	76.8413	0.649184	1.39031	1.37799	1.13916
NM_001081241	Fam65a	145	3817	4134	22.8832	22	0	17	2	48	1	22	15	47	67.7157	58.1167	55.3239	1.28337	0.88548	1.34448	1.17111
NM_001291903	Adcy8	1191	4851	4949	17.2702	17	0	18	1	35	0	17	17	35	52.4974	66.0816	41.3337	1.09071	1.24461	1.14032	1.15855
NM_171824	Pgbd5	152	1382	2824	89.4264	13	1	13	0	23	0	12	13	23	110.267	150.366	80.824	1.14125	1.41498	0.843184	1.13314
NM_001242411	Srgap1	122	3311	7718	3.11158	8	0	9	1	10	1	8	8	9	28.3534	35.6901	12.1985	1.26519	1.41457	0.697679	1.12581
NM_001039184	Cep350	420	9708	13307	10.2034	42	5	27	3	94	4	37	24	90	45.0245	36.7622	41.883	1.19564	0.723671	1.56407	1.16113
NM_001290469	Atp1a3	177	3219	3600	839.59	85	10	74	8	272	9	75	66	263	278.658	308.672	373.692	1.08945	1.06919	1.32997	1.16287
NM_172268	Nup214	114	6372	8195	4.185	14	1	11	3	59	2	13	8	57	23.4789	18.1873	39.3692	0.809172	0.258895	2.16013	1.07607
NM_011941	Mapkbp1	353	4865	6937	12.4244	25	0	10	1	50	1	25	9	49	62.624	28.3783	46.9401	1.54948	0.228583	1.57708	1.11838
NM_028059	Zfp654	107	1823	4745	6.26113	12	3	3	1	14	2	9	2	12	59.2782	16.5816	30.226	1.89539	-0.123303	1.46905	1.08038
NM_172617	Zfp523	328	2035	2712	6.94187	7	0	3	0	14	1	7	3	13	46.3483	25.0035	32.9175	1.47638	0.405491	1.51275	1.13154
NM_153514	Rhobtb2	519	2706	5231	17.6969	5	1	11	0	38	1	4	11	37	20.6719	71.5577	73.1257	-0.269006	1.3444	1.94461	1.00667
NM_001252083	Zfp384	327	1992	3137	4.2464	8	3	3	0	9	0	5	3	9	33.9411	25.6342	23.3639	1.3318	0.74504	1.39614	1.15766
NM_152804	Plk2	133	2182	2802	297.763	42	0	29	5	92	2	42	24	90	231.674	166.641	189.853	1.46612	0.820198	1.15018	1.1455
NM_146170	C87436	351	2076	2510	5.25929	3	0	7	0	8	0	3	7	8	19.6563	57.7327	20.0456	0.411054	1.78421	1.01063	1.06863
NM_176921	6030419C18Rik	1205	2084	2139	32.7568	6	0	4	1	18	0	6	3	18	77.1493	48.5562	88.5118	1.249	0.404603	1.7466	1.1334
NM_010732	Lrrn2	539	2732	3346	43.1822	16	0	11	0	45	1	16	11	44	82.4614	71.3619	86.7224	1.17366	0.789415	1.50464	1.1559
NM_175184	Mvb12b	552	1506	4995	17.2812	4	1	5	0	12	1	3	5	11	35.5421	74.5649	49.8381	0.527594	1.41847	1.40976	1.11861
NM_153560	Fam102a	728	1907	4217	16.0494	5	0	6	2	15	0	5	4	15	47.932	48.2679	54.9914	1.00493	0.836718	1.60858	1.15008
NM_133780	Tpr	106	7402	7550	24.2033	51	3	31	6	103	0	48	25	103	74.3577	48.7492	61.0197	1.38357	0.597262	1.44273	1.14119
NM_133853	Magi3	440	3821	6672	11.4019	15	0	12	1	27	0	15	11	27	50.1436	46.2871	34.5172	1.2821	0.987454	1.19961	1.15639
NM_001001984	Kdm2a	826	4312	7268	15.8845	12	1	19	1	36	0	11	18	36	35.6644	73.4612	44.6367	0.584832	1.44901	1.31555	1.11646
NM_033560	Vps37a	326	1520	6379	8.94699	7	0	3	0	7	1	7	3	6	66.2618	35.7462	21.7202	1.83463	0.764407	0.717794	1.10561
NM_173781	Rab6b	83	710	4734	132.738	6	1	12	4	20	0	5	8	20	90.1306	181.524	137.873	0.605321	1.44269	1.30994	1.11932
NM_001290628	Vps54	360	3258	4533	4.69872	12	1	6	1	14	0	11	5	14	42.9007	24.5462	20.8808	1.60698	0.619946	1.1562	1.12771
NM_016920	Atp6v0a1	177	2694	4008	116.904	40	4	27	11	80	4	36	16	76	161.655	90.4377	130.511	1.52695	0.515983	1.32846	1.1238
NM_001034874	Shisa6	162	1740	7487	12.1312	8	1	8	1	9	0	7	7	9	50.1373	63.1108	24.652	1.24346	1.39643	0.666321	1.10207
NM_001290486	Lpar1	125	1166	3247	1.29519	2	0	1	2	6	0	2	-1	6	21.7145	1	24.9125	1.42405	-3.20147	2.40187	0.208151
NM_020256	Zbtb33	292	2308	5122	12.1027	8	0	7	0	19	1	8	7	18	44.8507	49.3992	38.5922	1.08417	1.04449	1.31474	1.1478
NM_001205332	Map4	186	3447	5556	82.2018	29	1	26	4	100	2	28	22	98	97.0458	95.9808	129.895	1.00925	0.819351	1.59246	1.14035
NM_007858	Diaph1	105	3873	5613	9.25563	12	0	9	0	40	0	12	9	40	35.9948	33.9816	45.8845	0.933201	0.670424	1.77068	1.12477
NM_001081335	Cul9	152	7745	7844	14.4276	33	1	32	2	70	0	32	30	70	47.6328	56.2109	39.8476	1.06198	1.12231	1.22579	1.13669
NM_001163187	Plekhb1	194	764	1801	5.43877	1	0	1	0	6	0	1	1	6	19.8287	24.9596	45.4982	0.402837	0.553693	2.16735	1.04129
NM_144837	Ice1	37	6763	7675	18.9671	34	5	28	5	105	4	29	23	101	48.7316	48.6501	64.9056	0.925177	0.744913	1.71926	1.12978
NM_007968	Ewsr1	67	2035	2412	53.6284	16	4	13	0	47	1	12	13	46	68.9169	93.979	101.03	0.780392	1.05277	1.55834	1.1305
NM_001081473	Zxdb	106	2728	5623	7.93428	6	0	10	1	21	0	6	9	21	25.8636	48.834	34.6182	0.551893	1.28871	1.48266	1.10775
NM_016774	Atp5b	20	1610	1879	1044.1	48	5	48	14	170	5	43	34	165	305.662	304.225	448.543	1.08765	0.913591	1.42572	1.14232
NM_012026	Arhgef28	104	5207	6259	24.678	32	3	22	1	74	3	29	21	71	64.2306	58.5472	60.1382	1.1603	0.849486	1.4068	1.13886
NM_001109042	Kif21a	249	4953	6128	65.3629	50	4	30	2	104	2	46	28	102	110.525	84.6844	93.7239	1.33908	0.780296	1.29788	1.13908
NM_008503	Rps2	73	955	999	133.635	8	3	15	1	28	1	5	14	27	64.0724	225.825	132.316	0.108826	1.75357	1.2454	1.03593
NM_001290503	Zer1	414	2715	4218	65.7613	23	0	18	2	43	2	23	16	41	112.975	98.9273	77.0166	1.36694	1.00081	1.00996	1.1259
NM_001277867	Mphosph9	344	3779	7837	2.33734	8	0	6	0	10	0	8	6	10	26.3228	24.8506	12.5832	1.33548	1.06906	0.962505	1.12235
NM_029741	Ppfia3	376	3961	4866	44.069	23	1	25	3	72	3	22	22	69	69.359	87.3064	83.1912	0.911409	1.06779	1.42903	1.13608
NM_053201	Magee1	233	2990	3584	62.7187	21	1	21	1	63	2	20	20	61	81.9904	103.206	95.6336	0.933852	1.09117	1.35873	1.12792
NM_001142809	Slc6a8	656	2564	3966	9.79154	8	0	2	0	27	0	8	2	27	47.3894	14.913	61.165	1.29506	-0.552533	2.14209	0.96154
NM_010611	Kcnq2	197	2810	8284	83.6554	26	1	22	3	66	0	25	19	66	108.136	103.449	109.175	1.15448	0.916627	1.32827	1.13313
NM_017367	Ccni	626	1760	2804	34.763	9	2	8	1	15	0	7	7	15	69.7677	87.8208	57.1736	1.06704	1.22279	1.07037	1.12006
NM_001110327	Dmtf1	292	2368	3529	15.4729	12	2	9	0	16	0	10	9	16	54.443	61.6776	33.3127	1.21138	1.213	0.91358	1.11265
NM_198007	Ascc3	271	6868	7477	8.14291	24	1	18	4	60	1	23	14	59	39.405	30.1922	38.6565	1.14325	0.578962	1.62188	1.1147
NM_001015681	E130308A19Rik	305	2456	3720	1.32967	0	1	5	0	10	1	-1	5	9	1	33.0706	18.085	-3.03283	1.82978	1.9196	0.23885
NM_133897	Lrrc8c	235	2647	2829	5.02197	6	0	5	1	19	0	6	4	19	28.1154	23.5937	34.0482	0.956065	0.521747	1.81043	1.09608
NM_008717	Zfp638	339	6120	6368	44.8876	47	8	34	4	125	5	39	30	120	76.2485	73.8297	89.7213	1.03662	0.814536	1.5239	1.12502
NM_023565	Cse1l	92	3008	3604	21.8357	20	2	12	1	34	1	18	11	33	69.7677	53.6683	48.9152	1.35551	0.799543	1.2029	1.11932
NM_145484	Zfp758	323	1979	2974	7.20202	6	1	8	2	8	0	5	6	8	34.1255	51.547	20.8808	1.01189	1.42653	0.827774	1.08873
NM_001164366	Atp13a2	194	3542	4253	35.7244	11	2	23	4	88	0	9	19	88	30.3827	80.7385	113.609	-0.149196	1.08463	2.04005	0.991829
NM_001100451	Msl2	517	2251	4889	11.3454	6	1	6	1	22	1	5	5	21	32.5905	41.0236	52.3465	0.663568	0.816366	1.80421	1.09471
NM_001145999	Zfp710	201	2202	4449	4.10184	5	1	6	0	8	0	4	6	8	22.5934	42.6596	17.2807	0.766164	1.50124	0.987656	1.08502
NM_001034907	Zc3h12b	857	3365	3365	9.48686	11	1	6	2	29	0	10	4	29	45.0653	22.6906	49.979	1.24212	0.0725181	1.87502	1.06322
NM_015822	Fbxl3	349	1636	4265	22.7896	7	0	6	0	14	0	7	6	14	61.4737	66.3262	47.0183	1.14639	1.07864	1.11296	1.11266
NM_172920	Dpy19l1	10	2251	4740	19.0533	11	0	10	1	26	1	11	9	25	55.478	57.1365	48.2187	1.10942	0.974081	1.28703	1.12351
NM_001159963	Fbxl5	101	2174	2855	56.4841	12	1	22	2	37	1	11	20	36	59.974	137.26	75.0621	0.547687	1.56722	1.08982	1.06824
NM_172549	Cabin1	462	7026	7460	12.9946	26	3	23	5	84	1	23	18	83	39.6031	39.0136	54.6546	0.860534	0.660053	1.76209	1.09422
NM_010804	Mllt10	135	3342	4920	4.43391	8	0	9	0	12	0	8	9	12	28.1943	39.926	16.1733	1.03737	1.35761	0.832249	1.07574
NM_001081655	Dact3	108	1941	2828	27.2131	6	0	11	0	30	1	6	11	29	36.9963	85.3774	68.3837	0.303755	1.33333	1.51697	1.05135
NM_007842	Dhx9	150	4302	4613	44.4086	23	4	33	2	79	2	19	31	77	51.7209	106.223	80.1587	0.48331	1.34598	1.36956	1.06628
NM_145515	Mark1	77	2465	4565	12.7119	19	0	6	3	23	1	19	3	22	89.9267	17.8731	39.8204	2.05732	-0.452549	1.32217	0.975645
NM_018781	Egr3	0	1164	3872	24.9894	10	0	3	1	19	0	10	2	19	97.0994	24.445	70.5534	1.74872	-0.418324	1.62759	0.985995
NM_001198912	Arhgef2	224	3101	4290	42.7392	33	2	13	6	62	3	31	7	59	121.784	34.6155	88.64	1.74259	-0.247951	1.54412	1.01292
NM_172712	Uba6	5	3167	5097	8.45724	8	1	12	1	26	0	7	11	26	25.0211	49.493	35.5409	0.464518	1.26862	1.47153	1.06822
NM_019923	Itpr2	345	8451	11823	1.32809	10	0	9	1	33	1	10	8	32	13.9432	14.0409	17.0632	0.769399	0.594602	1.8366	1.06687
NM_011908	Ubl3	809	1163	2667	67.8392	3	0	2	0	9	0	3	2	9	95.7828	80.3784	109.89	1.10948	0.682038	1.49885	1.09679
NM_028116	Pygo1	262	1516	1745	6.68584	5	0	2	0	9	0	5	2	9	45.0653	22.6906	31.0215	1.4592	0.288668	1.45606	1.06797
NM_001081337	Sipa1l2	114	5283	6365	13.3427	22	2	16	2	63	2	20	14	61	43.7314	38.5331	51.0083	0.987192	0.625845	1.64215	1.08506
NM_172655	Hecw2	94	979	1132	11.5622	3	0	3	0	8	0	3	3	8	38.3131	48.227	39.0719	0.885218	1.03806	1.36769	1.09699
NM_001164086	Homer2	162	1194	10966	10.5687	3	0	4	0	8	0	3	4	8	32.8557	55.1433	33.5064	0.71926	1.28691	1.21509	1.07375
NM_173876	Clcn3	178	2554	5250	45.8353	17	2	12	1	59	3	15	11	56	71.3534	65.8656	101.873	0.927927	0.636954	1.69108	1.08532
NM_178707	Zfp592	204	3993	7292	4.91438	12	2	11	2	20	1	10	9	19	29.8294	33.7933	21.6744	1.05488	1.05346	1.1755	1.09461
NM_001004143	Usp22	174	1752	4442	97.0758	16	1	15	0	35	1	15	15	34	107.437	135.237	93.1299	1.05282	1.21129	0.984528	1.08288
NM_144908	Galnt11	177	2004	2541	17.592	9	0	7	1	21	0	9	6	21	55.6767	46.7224	49.6819	1.16408	0.733077	1.39152	1.09623
NM_007964	Evi5	68	2498	5849	9.98799	10	0	6	0	21	1	10	6	20	46.5118	35.1283	35.5747	1.25577	0.671264	1.34496	1.09067
NM_052993	C1galt1	188	1280	2065	1.97899	1	1	2	0	8	0	0	2	8	1	26.0567	31.6654	-3.27952	1.24025	2.4219	0.127542
NM_172958	Mtmr12	105	2349	4518	13.0677	9	0	9	1	19	0	9	8	19	45.3304	50.7201	36.5972	1.05192	1.03517	1.17917	1.08875
NM_001081354	Mamld1	157	2569	3457	5.31078	14	0	2	1	18	2	14	1	16	65.6025	5.89842	28.6721	2.14377	-1.51279	1.51951	0.716828
NM_207515	Mbnl2	682	1750	4499	75.335	8	3	9	0	33	0	5	9	33	52.9137	119.89	133.555	0.188337	1.19413	1.69963	1.02737
NM_001285917	Dapk1	274	4603	5398	52.1489	44	2	20	4	93	0	42	16	93	109.656	52.583	92.8566	1.4678	0.232308	1.45815	1.05275
NM_153078	Ehbp1	397	4018	4974	12.8627	16	1	16	1	24	1	15	15	23	46.8201	58.9353	27.4547	1.10838	1.26151	0.776644	1.04884
NM_134123	Scaf8	417	4224	4873	17.7151	19	2	10	1	62	2	17	9	60	50.4703	33.6335	68.1217	1.01812	0.254554	1.84155	1.03807
NM_007595	Camk2b	210	1839	4025	343.127	26	1	28	6	92	4	25	22	88	173.456	192.138	233.496	0.960627	0.938006	1.33964	1.07942
NM_211355	Smek1	832	3295	4555	13.8771	12	0	8	1	24	1	12	7	23	55.0664	40.434	40.3628	1.29533	0.671057	1.27424	1.08021
NM_001077190	Abi1	176	1622	3505	62.3886	8	2	13	1	39	1	6	12	38	46.8978	118.066	113.588	0.131192	1.28849	1.61101	1.01023
NM_134027	Med1	210	1881	2822	13.0812	8	1	3	0	23	0	7	3	23	47.3469	25.5421	59.4934	1.11407	0.044852	1.87937	1.01276
NM_134034	Smek2	399	2862	5108	15.5002	8	0	11	2	31	1	8	9	30	36.7109	51.9865	52.6471	0.641751	0.965297	1.57251	1.05985
NM_199196	Suz12	214	2440	4373	14.3374	10	2	9	1	23	0	8	8	23	40.6195	51.1302	44.6601	0.836091	0.989507	1.39511	1.07357
NM_015744	Enpp2	185	2774	3239	31.0817	23	1	16	9	43	3	22	7	40	96.0418	38.4661	66.7798	1.59758	0.100961	1.38051	1.02635
NM_173443	Vcpip1	226	3889	9749	24.9198	19	1	18	2	51	2	18	16	49	55.5399	62.1435	57.8198	0.944513	0.929464	1.34258	1.07218
NM_153060	Spns2	125	1775	3257	9.25717	5	0	5	0	13	0	5	5	13	34.2496	43.1121	34.0547	0.861397	1.01366	1.3404	1.07182
NM_175143	Qrich1	175	2509	3238	39.0093	17	1	11	0	39	0	16	11	39	77.4798	67.0509	72.2239	1.1468	0.762295	1.31887	1.07599
NM_144920	Plekha5	66	3876	5133	8.61271	15	0	10	1	28	1	15	9	27	44.4975	33.607	30.6306	1.2838	0.698903	1.24301	1.07524
NM_001081183	1110037F02Rik	85	5671	7115	13.3253	25	2	26	5	44	1	23	21	43	46.5368	53.4849	33.2725	1.07771	1.09969	1.02675	1.06805
NM_001166648	Zfp280c	146	2375	4023	2.01273	9	1	3	1	5	0	8	2	5	40.5648	12.7653	9.69566	2.05215	0.20038	0.701405	0.984645
NM_013765	Rps26	28	376	448	26.4451	2	0	2	0	3	0	2	2	3	64.9562	81.7642	37.2614	1.1336	1.28863	0.663013	1.02842
NM_021465	Stag2	230	3926	5826	17.2897	12	2	17	5	63	0	10	12	63	30.58	46.1915	73.676	0.310353	0.727297	1.97333	1.00366
NM_028715	Fcho1	116	2738	3160	12.8913	13	2	9	0	21	0	11	9	21	47.4165	48.834	34.6182	1.12527	0.988893	1.10941	1.07452
NM_020493	Srf	334	1849	4093	12.5375	4	0	5	0	18	0	4	5	18	29.8412	46.9537	51.3543	0.474443	0.949433	1.69977	1.04121
NM_028898	Rptor	905	4913	7022	17.6947	20	0	11	1	55	1	20	10	54	56.3991	35.4965	58.2349	1.17907	0.33304	1.61621	1.04277
NM_001081286	Fat1	6	13779	14627	6.03876	35	5	39	6	105	4	30	33	101	24.6185	34.0877	31.6964	0.650072	0.938707	1.56539	1.05139
NM_001029877	Nova2	192	1671	8372	10.8388	7	0	3	0	15	2	7	3	13	53.4933	28.858	37.992	1.40681	0.337099	1.37694	1.04029
NM_009530	Atrx	253	7684	10244	42.3535	58	4	50	15	134	4	54	35	130	82.1327	67.009	75.616	1.17991	0.710587	1.32183	1.07078
NM_173431	Rpgrip1l	27	3822	6969	5.84705	10	0	10	1	24	1	10	9	23	29.7823	33.7399	26.1959	0.944795	0.943838	1.31522	1.06795
NM_175642	Adgrb3	261	4830	5522	50.8851	48	2	24	5	82	3	46	19	79	113.791	59.1623	74.7349	1.53642	0.417545	1.16379	1.03925
NM_170756	Spata2	234	1782	3996	11.8649	6	1	8	0	8	0	5	8	8	36.5064	73.5244	22.3376	0.799492	1.63048	0.541159	0.990377
NM_031877	Wasf1	104	1784	2550	112.682	14	1	15	2	63	1	13	13	62	87.4588	110.09	159.514	0.663529	0.82239	1.64626	1.04406
NM_001038587	Adar	845	3638	5918	34.2848	15	0	17	1	41	2	15	16	39	60.7002	81.5008	60.3547	0.874769	1.1236	1.15913	1.0525
NM_028792	Josd1	955	1564	3394	23.7549	1	0	4	0	10	0	1	4	10	18.5589	93.4448	70.9741	-0.6072	1.54755	1.67513	0.871825
NM_021356	Gab1	876	2964	4859	2.22703	5	0	1	2	15	0	5	-1	15	27.0651	1	31.0512	1.40559	-3.53628	2.30283	0.0573801
NM_001012330	Zbtb18	149	1745	3838	178.611	18	6	24	1	59	2	12	23	57	84.9802	205.025	154.369	0.336287	1.43496	1.24471	1.00532
NM_001252105	Cadps2	284	4079	4849	80.8683	32	1	32	0	78	1	31	32	77	92.325	119.964	87.6993	0.947448	1.15124	1.03833	1.04567
NM_199027	Zfp335	284	4298	4570	4.19497	8	0	6	0	29	0	8	6	29	22.5259	21.266	31.2276	0.747917	0.483048	1.82405	1.01834
NM_144922	Hnrnpul1	85	2665	2876	38.7878	20	2	12	2	49	1	18	10	48	78.8538	55.1433	80.4153	1.17569	0.483742	1.47824	1.04589
NM_183141	Elfn2	522	2994	4865	24.3881	16	1	9	4	47	1	15	5	46	68.5824	28.7762	80.4316	1.26221	-0.167937	1.83536	0.976544
NM_001081111	Tmf1	101	3377	6781	13.7895	15	1	10	1	34	0	14	9	34	48.3007	39.0851	44.8593	1.11014	0.62602	1.43149	1.05588
NM_144560	Gas2l1	391	2428	2844	5.19421	3	1	8	2	16	0	2	6	16	11.0971	41.9057	33.9505	-0.406033	1.32966	1.78036	0.90133
NM_009671	Ankfy1	23	3533	8034	9.47026	14	0	7	0	31	0	14	7	31	45.0807	28.3729	38.1744	1.2437	0.396021	1.48765	1.04246
NM_001177379	Cpeb2	0	2979	6757	11.1415	10	1	12	2	26	0	9	10	26	34.1461	47.7576	37.7242	0.742093	1.04685	1.34556	1.04483
NM_011078	Phf2	120	3411	5260	6.27389	11	1	9	1	18	0	10	8	18	34.3433	34.584	23.6408	1.10666	0.935963	1.11297	1.05186
NM_207692	Mapk9	273	1545	4677	38.7437	10	0	7	0	14	0	10	7	14	88.8551	78.2931	47.5728	1.34868	0.990144	0.72178	1.0202
NM_194061	D630045J12Rik	0	5823	10970	6.54851	23	3	12	0	38	3	20	12	35	38.8198	29.3189	25.98	1.25684	0.671225	1.21615	1.04807
NM_010690	Lats1	374	3764	7215	7.09616	10	2	8	0	28	0	8	8	28	26.6723	33.574	35.7006	0.665569	0.817127	1.61293	1.03188
NM_008149	Gpam	148	2632	3834	9.54953	7	2	9	0	23	1	5	9	22	22.7503	51.547	38.2815	0.251909	1.25225	1.48528	0.996479
NM_134071	Slf1	116	3281	3742	7.57337	10	1	9	1	23	0	9	8	23	32.1394	35.9608	31.4103	0.894198	0.876003	1.37817	1.04946
NM_011855	Tenm1	93	8289	8363	13.6659	47	3	26	6	73	3	44	20	70	60.6765	34.7169	36.9159	1.44481	0.460597	1.15725	1.02089
NM_010754	Smad2	331	1735	8752	5.31467	4	0	4	0	6	1	4	4	5	32.2005	40.5327	15.3929	1.11665	1.26744	0.621559	1.00188
NM_021324	Ttyh1	125	1478	3057	47.4338	5	1	9	1	40	0	4	8	40	33.4143	84.1211	127.785	-0.187856	0.96872	1.99167	0.924177
NM_009239	Sp4	207	2556	9017	5.80722	4	0	9	0	12	1	4	9	11	19.2463	54.5095	20.2408	0.31916	1.64011	0.9484	0.969225
NM_001080748	Gtf2i	383	3260	4337	53.3672	21	2	19	3	67	5	19	16	62	74.642	79.1212	93.1471	0.898551	0.807511	1.44489	1.05032
NM_001166414	Rfx3	162	2412	9146	18.33	13	0	7	3	34	1	13	4	33	65.3026	25.2924	63.3941	1.36866	-0.177719	1.71155	0.967494
NM_019740	Foxo3	325	2344	2889	10.4279	5	1	7	1	24	0	4	6	24	22.392	42.2793	51.3798	0.174418	0.911955	1.84217	0.97618
NM_001159534	Cacna1c	520	6940	13592	11.9574	24	5	26	4	61	1	19	22	60	33.4494	48.7529	40.3956	0.668508	1.03295	1.38991	1.03046
NM_153057	Nomo1	136	3781	4259	44.2706	20	2	31	7	66	2	18	24	64	55.8142	93.6756	75.8927	0.595125	1.16656	1.29305	1.01824
NM_001166377	Armcx1	703	2074	2470	50.1739	14	1	8	1	19	0	13	7	19	107.171	72.6396	59.9009	1.45868	0.722317	0.855411	1.01213
NM_182995	Ccp110	295	3310	5009	9.52689	7	1	12	4	35	0	6	8	35	22.4923	37.7499	50.1762	0.236923	0.804296	1.87746	0.972894
NM_001145779	Kif2a	39	2157	3711	29.1915	13	1	9	1	35	2	12	8	33	64.0361	53.7374	67.345	1.05172	0.622056	1.44092	1.03823
NM_181415	Atrnl1	320	4457	6586	26.7913	22	3	24	1	47	1	19	23	46	51.9084	79.0961	48.0607	0.802033	1.23273	1.02018	1.01832
NM_175171	Mast4	300	8157	10671	8.50786	19	4	21	3	93	2	15	18	91	21.5776	32.5933	50.0613	0.24721	0.662282	1.96115	0.956881
NM_009461	Ubr1	113	5387	7765	11.9471	22	3	17	6	63	0	19	11	63	40.7177	29.6733	51.6319	0.952716	0.317154	1.74464	1.00484
NM_028705	Herc3	101	3254	4731	75.2146	23	1	28	4	74	1	22	24	73	78.8621	108.293	100.073	0.765019	1.04834	1.28447	1.03261
NM_013492	Clu	233	1580	1811	62.2226	9	1	12	2	28	0	8	10	28	67.1262	105.62	89.8479	0.6502	1.12942	1.27481	1.01814
NM_011067	Per3	433	3775	5996	4.85293	11	1	7	1	17	0	10	6	17	33.8192	25.5421	21.9867	1.24379	0.657379	1.20582	1.03566
NM_027341	Dzip3	392	3389	5153	26.4151	17	1	18	4	37	2	16	14	35	60.3397	66.459	50.4776	1.02794	0.990329	1.10185	1.04004
NM_001081212	Irs2	0	3966	4015	17.4202	16	2	14	0	50	0	14	14	50	39.8974	50.2213	54.4922	0.689395	0.843325	1.5324	1.02171
NM_031842	Smarcd1	35	1583	3153	20.6987	6	0	8	4	29	1	6	4	28	43.8076	36.7622	78.1816	0.717305	0.286728	1.92057	0.974866
NM_019663	Pias1	8	1964	3855	11.5751	9	0	5	1	18	0	9	4	18	52.0048	29.094	39.776	1.32533	0.308255	1.3926	1.00873
NM_019588	Plce1	62	6911	9514	1.55842	4	2	13	2	36	0	2	11	36	3.30044	22.8496	22.7192	-1.40864	1.19834	2.12664	0.638777
NM_001195268	Cbarp	7	2104	2958	44.6015	11	2	15	5	55	1	9	10	54	48.508	67.8444	111.304	0.388098	0.696515	1.83981	0.974807
NM_001145919	Ythdf3	314	2072	5131	22.0022	10	1	5	1	30	0	9	4	30	57.862	32.3708	73.7598	1.08085	0.0654728	1.78961	0.978644
NM_009093	Rps29	128	299	390	86.7888	0	0	3	0	6	0	0	3	6	1	249.596	151.661	-5.62503	2.16459	1.7742	-0.562083
NM_024452	Luzp1	397	3604	7529	31.3587	23	3	15	4	54	1	20	11	53	70.4856	48.7985	71.4322	1.14574	0.438728	1.47085	1.01844
NM_019739	Foxo1	465	2424	5552	3.80693	5	1	4	0	9	0	4	4	9	23.0778	29.0495	19.8575	0.843054	0.992967	1.24556	1.02719
NM_001109688	C2cd5	249	3222	4310	9.97913	13	0	8	0	19	1	13	8	18	49.4217	38.2832	26.1695	1.34387	0.795886	0.902679	1.01414
NM_013595	Mbd3	300	1158	1643	9.86982	3	0	4	0	3	0	3	4	3	39.5188	66.3262	15.113	1.02809	1.59556	0.119057	0.914237
NM_013780	Npas3	0	2778	5879	1.16825	2	0	3	0	11	0	2	3	11	8.13706	15.3639	17.115	0.0719692	0.803724	1.93959	0.938429
NM_020608	Cramp1l	105	3963	7519	7.03336	12	1	9	2	32	0	11	7	32	32.2255	25.8136	35.8513	0.943948	0.443405	1.62585	1.0044
NM_021536	Rhot1	193	2089	4137	33.008	9	4	10	0	42	0	5	10	42	29.8058	75.0368	95.7477	-0.127793	1.02783	1.85409	0.918042
NM_030174	Mctp1	345	2430	4289	14.3409	12	0	7	1	14	0	12	6	14	65.0496	40.9409	29.0228	1.51531	0.668722	0.773119	0.985716
NM_175105	Aqp11	260	1076	1322	3.04406	2	1	1	0	6	0	1	1	6	13.8509	17.435	31.7818	0.245262	0.394584	2.09605	0.911966
NM_010431	Hif1a	423	2934	4761	37.9338	15	4	14	1	51	2	11	13	49	49.5126	73.6562	84.3464	0.518121	0.915115	1.56422	0.999152
NM_001177648	Fnbp1	206	2057	4727	5.24842	4	2	6	0	13	1	2	6	12	12.2122	46.1166	28.0216	-0.274333	1.46139	1.49548	0.894178
NM_001128096	Atp13a3	279	4029	7310	14.2538	19	6	13	1	42	2	13	12	40	39.1816	45.5263	46.1048	0.787721	0.825644	1.44554	1.01963
NM_009297	Supt6	186	5367	6201	50.5714	29	8	44	4	103	1	21	40	102	45.8116	109.84	85.095	0.227658	1.31401	1.35584	0.965837
NM_177093	Lrrc58	96	1197	8592	12.0252	5	0	2	1	16	0	5	1	16	51.3278	12.9219	62.8131	1.28276	-0.886218	2.02243	0.806324
NM_001290659	Tanc1	123	5673	7763	22.9466	19	0	19	2	109	3	19	17	106	38.6928	43.5781	82.5525	0.47423	0.468423	1.91977	0.95414
NM_053099	Setbp1	369	5118	9955	8.22909	17	0	14	1	26	0	17	13	26	40.4591	38.9452	23.664	1.1748	0.93973	0.905772	1.00677
NM_001172098	Strn3	211	2350	3912	31.506	17	2	10	7	51	1	15	3	50	79.2593	19.9537	101.036	1.31208	-0.854349	1.96747	0.808401
NM_001099276	Pik3c2b	500	5399	7929	3.15517	11	1	7	0	25	1	10	7	24	23.0708	20.3284	21.1749	0.959104	0.593948	1.48264	1.0119
NM_145223	Alms1	115	9871	9984	1.75417	27	2	6	0	33	0	25	6	33	28.9626	8.74968	14.6204	1.65141	-0.259617	1.39971	0.930502
NM_133685	Rab31	208	796	3476	7.10595	1	0	2	0	4	0	1	2	4	19.2217	48.3911	29.4036	0.192111	1.34367	1.33192	0.9559
NM_008395	Itch	203	2798	5187	21.568	16	1	9	0	30	3	15	9	27	65.3316	49.3421	44.9722	1.26838	0.685912	1.09113	1.01514
NM_001081080	Phf3	26	6104	7561	17.9732	32	3	24	2	59	2	29	22	57	53.9271	51.4961	40.5351	1.10472	0.860184	1.08149	1.01546
NM_009753	Bicd1	445	2953	9667	9.13858	9	0	9	1	13	0	9	8	13	40.5588	45.3811	22.4044	1.11332	1.09562	0.746243	0.985062
NM_033581	Pcdhgc3	138	2943	4687	6.61369	8	1	6	1	24	0	7	5	24	28.2056	25.36	36.9825	0.789889	0.455834	1.71797	0.987899
NM_029349	2310035C23Rik	247	3826	5334	26.4467	18	3	16	3	62	0	15	13	62	47.3695	51.6766	74.8768	0.678056	0.626638	1.6698	0.991498
NM_172289	Slc36a4	23	1526	1937	11.3801	7	0	4	0	11	1	7	4	10	52.6391	37.8629	28.758	1.35336	0.698811	0.937731	0.996634
NM_023229	Fastk	88	1726	1840	12.5897	8	0	5	0	10	0	8	5	10	55.2008	43.4279	26.3878	1.35925	0.834252	0.735961	0.976488
NM_174988	Cdh22	493	2935	3586	5.63353	5	0	5	1	21	0	5	4	21	23.1416	23.3038	37.1699	0.603909	0.432929	1.84862	0.961819
NM_001165956	Phc3	28	2884	10925	7.94319	11	1	5	0	24	1	10	5	23	39.5741	24.9072	34.8086	1.16483	0.316689	1.48971	0.990412
NM_207214	Exoc5	515	2642	4659	29.8775	12	1	13	0	20	0	11	13	20	58.4514	86.9538	40.6424	0.905665	1.30203	0.694469	0.967388
NM_173758	Vwa8	106	3223	3486	8.26853	14	1	6	2	27	0	13	4	27	47.1385	18.2573	37.4407	1.39228	-0.156197	1.56401	0.933364
NM_134089	Scrib	397	5395	5624	3.45476	6	0	12	2	32	2	6	10	30	13.5683	28.4653	25.9443	0.137002	1.02362	1.70594	0.955523
NM_008679	Ncoa3	220	4432	7531	7.25889	13	1	13	1	25	2	12	12	23	32.2005	40.5327	23.6024	0.923246	1.07486	0.998484	0.998865
NM_001195023	Nploc4	187	2014	4685	16.1672	6	0	5	0	26	0	6	5	26	37.1178	38.9354	61.5109	0.631516	0.522215	1.76459	0.972775
NM_145542	Ahcyl1	271	1864	3851	42.5209	9	0	8	1	34	1	9	7	33	63.8552	62.5165	89.5397	0.814314	0.608031	1.56263	0.994992
NM_001081113	Ipo8	220	3253	5359	14.135	15	0	7	1	33	0	15	6	33	55.897	28.1444	47.0283	1.30551	0.136961	1.48059	0.974352
NM_013889	Zfp292	29	8126	9977	10.9425	26	3	29	3	70	1	23	26	69	32.105	45.6838	36.8334	0.66435	0.993929	1.32494	0.994406
NM_001082484	Snx27	167	1787	5469	31.4054	7	0	10	1	23	1	7	9	22	48.8374	79.0388	58.6982	0.615476	1.13353	1.18645	0.978486
NM_198600	Papd7	411	2040	3997	12.5706	5	1	5	0	20	1	4	5	19	27.7529	43.6678	50.4139	0.36814	0.843137	1.67107	0.960784
NM_017475	Rragc	101	1298	2606	31.6531	6	2	7	0	19	0	4	7	19	37.769	83.1987	68.6083	0.239818	1.20268	1.40547	0.949323
NM_177185	Ubn2	248	4193	14669	2.24882	8	0	4	0	16	0	8	4	16	22.9199	14.4253	17.5303	1.15971	0.308236	1.47055	0.979501
NM_001122594	Phlpp2	16	4084	7847	10.5933	17	1	12	3	35	1	16	9	34	44.4538	31.4756	36.1256	1.15397	0.476515	1.32188	0.984124
NM_001162366	Ptk2b	37	3067	3864	332.717	59	5	41	6	134	2	54	35	132	201.428	164.338	188.299	1.19544	0.731558	1.05296	0.993321
NM_199446	Phkb	159	3417	4617	6.19502	7	2	10	2	27	0	5	8	27	17.3456	34.9343	35.8204	0.129045	0.958316	1.7222	0.936522
NM_027996	Zswim8	297	5796	6073	26.1217	17	3	30	2	94	1	14	28	93	28.7749	72.4414	73.0999	-0.0334208	1.12158	1.64466	0.91094
NM_012014	Gprin1	559	3358	4348	71.2347	24	0	19	5	68	1	24	14	67	96.9121	71.1603	103.464	1.09609	0.476133	1.37436	0.982194
NM_175180	Wdr44	412	3160	4179	9.29011	10	0	8	2	23	2	10	6	21	41.1294	31.0633	33.0309	1.12328	0.538581	1.29363	0.985163
NM_001199247	Kat5	65	1451	1855	19.7312	9	0	4	0	12	0	9	4	12	73.392	41.0591	37.4227	1.49144	0.475777	0.894467	0.953895
NM_172610	Mpped1	166	1147	3255	93.1096	11	0	6	0	22	1	11	6	21	126.734	87.0152	92.5268	1.31701	0.600903	1.00723	0.975051
NM_001293663	Camk2d	489	2028	5593	16.2018	7	0	6	0	11	0	7	6	11	51.4078	55.4658	30.8938	1.10007	1.03141	0.769425	0.966967
NM_001033254	Pak6	642	2691	4137	12.8125	6	2	9	1	22	0	4	8	22	22.0642	55.547	46.4086	0.0253812	1.1785	1.53699	0.913622
NM_009677	Ap1g1	383	2861	6876	27.7282	10	0	11	1	43	2	10	10	41	45.6109	57.4131	71.5155	0.59412	0.749278	1.56715	0.970183
NM_172464	Daam1	166	3400	5888	13.4992	12	0	13	4	34	2	12	9	32	41.9383	39.5927	42.7688	0.919559	0.657778	1.37901	0.985449
NM_011322	Scn1b	240	897	1515	162.402	6	0	4	0	35	1	6	4	34	103.218	86.6178	223.682	0.675802	0.250667	1.85294	0.926469
NM_175337	Mlh3	125	4361	5517	10.1806	15	1	8	1	49	1	14	7	48	37.3544	23.5101	48.9782	0.927602	0.0801131	1.79156	0.933093
NM_023858	Mtmr2	140	2072	3017	20.7752	9	1	7	1	27	0	8	6	27	46.8007	44.1832	60.4052	0.810364	0.549722	1.54557	0.968553
NM_032543	Rnf123	201	4146	4314	13.6016	15	0	14	2	35	0	15	12	35	42.9748	43.276	38.3476	0.950092	0.78144	1.21577	0.982435
NM_013494	Cpe	160	1591	2172	844.422	29	10	47	7	112	4	19	40	108	150.066	397.679	326.213	0.192995	1.43118	1.12952	0.917897
NM_001081315	Brpf3	262	3877	5973	4.01535	6	1	8	1	24	1	5	7	23	15.6326	27.5488	27.5003	0.248039	0.883519	1.67433	0.935297
NM_001009949	Slc25a51	223	1120	4438	19.4606	3	3	9	0	13	2	0	9	11	1	142.746	53.0051	-4.69754	2.28198	1.4073	-0.336087
NM_172495	Ncoa7	341	3173	5107	26.3915	13	1	17	4	38	1	12	13	37	47.8914	65.3075	56.471	0.695159	0.965664	1.2644	0.975075
NM_001285519	Nr1h2	305	1637	2006	6.5127	6	1	2	0	8	0	5	2	8	42.4263	21.3618	25.9599	1.38842	0.217818	1.21925	0.941828
NM_001166416	Med23	113	4244	4946	7.09516	12	1	11	0	24	0	11	11	24	30.0959	37.8835	25.1115	0.839883	0.99144	1.10544	0.978922
NM_028007	Itfg1	211	2044	3355	99.2623	24	1	12	0	33	0	23	12	33	141.819	93.139	77.816	1.43957	0.659495	0.708221	0.935761
NM_017377	B4galt2	469	1579	2432	11.9029	5	0	2	1	15	0	5	1	15	50.9116	12.8171	58.4098	1.27736	-0.891647	1.92544	0.770384
NM_001290540	Pdzd4	628	2602	3627	43.1509	11	0	16	4	29	0	11	12	29	62.9818	86.4862	63.4992	0.785321	1.06718	1.05553	0.969344
NM_001170567	Depdc5	166	4942	7944	12.1284	17	1	13	4	59	0	16	9	59	37.8639	26.8096	53.3955	0.838542	0.161441	1.78152	0.927166
NM_011324	Scnn1a	541	2644	3499	1.37019	5	0	1	0	6	0	5	1	6	26.872	6.76509	12.3319	1.69658	-0.478135	1.3441	0.854183
NM_183187	Fam107a	297	732	3144	6.66362	1	0	1	0	3	0	1	1	3	25.9825	32.7057	29.8091	0.666782	0.818174	1.4011	0.96202
NM_001033394	Tmem88b	272	794	3471	1.94676	0	0	1	0	3	0	0	1	3	1	27.2547	24.8409	-3.26933	1.31524	2.08434	0.0434172
NM_201518	Flrt2	773	2756	7099	14.0896	4	0	10	0	17	0	4	10	17	22.7985	71.7447	37.0547	0.0136743	1.48897	1.13919	0.880611
NM_177646	Dgkd	14	3677	5694	43.5637	17	2	30	1	51	1	15	29	50	46.2833	112.635	58.9998	0.334969	1.44241	0.942182	0.906521
NM_172695	Plaa	222	2607	6815	13.6601	5	0	9	1	30	0	5	8	30	23.6947	47.7215	54.3689	0.0885035	0.919863	1.71612	0.908161
NM_011766	Zfpm2	502	3958	4974	5.01949	8	0	6	0	23	2	8	6	21	26.1629	24.6996	26.2641	0.852536	0.588142	1.43633	0.959003
NM_007889	Dvl3	131	2282	2953	5.54138	5	0	5	1	14	0	5	4	14	26.2724	26.4565	28.1323	0.797196	0.626173	1.4594	0.960922
NM_172585	Larp4b	338	2564	6073	16.5729	7	1	10	0	22	0	6	10	22	30.4646	63.9127	42.7184	0.331166	1.22193	1.21955	0.924216
NM_199299	Jade2	171	2661	6100	11.1468	8	0	8	0	18	0	8	8	18	36.3128	45.7092	31.2457	0.830552	0.983303	1.07335	0.962403
NM_024288	Rmnd5a	498	1674	6165	31.3196	11	1	4	3	24	0	10	1	24	96.1086	12.0978	88.2107	1.59385	-1.5726	1.77619	0.599148
NM_026969	Sec31a	133	3826	4228	31.8155	27	2	15	6	66	1	25	9	65	76.5121	34.6718	76.0767	1.25513	-0.0632812	1.55061	0.914151
NM_020278	Lgi1	101	1775	4259	45.429	17	5	8	2	33	0	12	6	33	81.0206	50.9927	85.2071	1.11676	0.273221	1.4402	0.943395
NM_001174107	Map3k9	296	3530	10619	5.77001	11	0	7	3	21	0	11	4	21	38.4434	17.5968	28.067	1.32131	0.0128861	1.42496	0.919716
NM_001145807	Brinp3	104	2405	2760	5.71135	9	0	3	0	12	0	9	3	12	44.2075	18.5489	22.5415	1.5292	0.0952192	1.11652	0.913645
NM_016782	Cntnap1	141	4299	5360	68.7149	29	2	34	2	78	3	27	32	75	73.392	109.491	77.964	0.717379	1.12005	0.993807	0.943744
NM_001143790	Ctc1	222	3858	4164	6.95026	8	1	15	1	16	0	7	14	16	21.7592	54.7793	19.0201	0.384745	1.53625	0.720488	0.880494
NM_007488	Arnt2	153	2292	6073	54.5739	16	0	12	2	41	0	16	10	41	84.5432	66.5123	82.8496	1.06438	0.543257	1.25868	0.955441
NM_009366	Tsc22d1	207	639	1730	176.085	5	0	3	0	18	0	5	3	18	130.814	98.7985	180.097	0.967444	0.39052	1.47805	0.945339
NM_013880	Plcl2	61	3448	4051	47.2758	17	2	25	3	61	0	15	22	61	50.0548	92.4102	77.8452	0.397258	1.10637	1.2792	0.927607
NM_013681	Syn2	179	1619	3858	195.902	18	1	18	2	47	4	17	16	43	133.431	158.078	129.069	0.929856	1.00272	0.915416	0.949329
NM_146028	Stac2	480	1707	3049	5.85189	5	0	2	0	6	1	5	2	5	46.0569	23.1899	17.6134	1.57325	0.402366	0.741915	0.905842
NM_001166547	Eif4enif1	228	3180	3679	15.2126	16	2	8	2	33	0	14	6	33	53.602	28.9166	48.3187	1.19945	0.130627	1.46314	0.93107
NM_010238	Brd2	1534	3931	4487	31.4739	15	2	9	2	47	3	13	7	44	61.2978	41.5473	79.3418	0.941972	0.204379	1.61953	0.921961
NM_001081184	Focad	78	5475	5796	8.62359	15	2	13	1	49	0	13	12	49	27.2245	31.6331	39.2429	0.574198	0.610794	1.5995	0.928163
NM_025483	Senp7	135	3249	4908	9.95177	11	2	9	2	29	0	9	7	29	32.6658	31.981	40.2529	0.748207	0.538088	1.526	0.93743
NM_201519	Map4k5	403	2947	4454	12.4376	11	1	6	0	23	0	10	6	23	44.4276	33.5542	39.0776	1.05355	0.469629	1.31178	0.944986
NM_029749	Usp42	127	4102	5151	3.37652	11	0	6	1	17	2	11	5	15	31.277	17.8956	16.3107	1.35608	0.36817	1.05396	0.926068
NM_024196	Tbc1d20	102	1311	1936	12.3232	3	0	5	0	9	0	3	5	9	28.0456	58.8378	32.1761	0.395606	1.28559	1.03853	0.906574
NM_008129	Gclm	429	1254	2072	9.20323	3	1	4	0	3	0	2	4	3	27.3997	68.9793	15.7175	0.543094	1.69534	0.229416	0.822616
NM_028966	Samd4	626	2498	6856	3.24459	2	0	3	0	13	1	2	3	12	12.0752	22.7996	27.7072	0.00774628	0.742199	1.84905	0.866333
NM_010601	Kcnh3	0	3288	3583	26.5334	19	1	14	3	47	4	18	11	43	61.8743	47.5963	56.5267	1.06141	0.505954	1.2617	0.943019
NM_017478	Copg2	97	2713	4016	42.6126	21	1	12	2	42	1	20	10	41	86.4096	54.3845	67.7429	1.24936	0.405658	1.15852	0.937847
NM_001033304	5330417C22Rik	259	2995	3326	8.37811	7	1	9	1	20	0	6	8	20	24.7859	41.5993	31.5959	0.456727	1.02376	1.30901	0.929834
NM_001128103	Ano3	141	3087	6026	40.0551	22	2	18	5	45	3	20	13	42	76.7303	62.7803	61.6217	1.11637	0.651008	1.06949	0.94562
NM_025729	Tab3	298	2449	6364	5.17593	10	0	2	0	10	0	10	2	10	52.5447	13.2282	20.0945	1.83952	-0.331684	1.02644	0.844758
NM_001039173	Dok6	0	996	996	30.2977	9	0	2	0	15	2	9	2	13	102.13	28.5682	56.4159	1.7021	-0.312436	1.15684	0.848835
NM_001103166	Pcbp2	245	1241	2775	19.8624	3	1	6	2	16	0	2	4	16	22.6955	57.1365	69.4349	-0.205884	0.948393	1.78112	0.841209
NM_001081307	Ppp1r12b	158	3137	3137	34.8781	18	1	13	1	45	0	17	12	45	64.4983	57.3091	65.2919	0.951686	0.60495	1.25938	0.938672
NM_174991	Adgrb1	898	5647	6227	57.7656	34	1	33	6	90	4	33	27	86	78.5383	80.8862	78.2733	0.922829	0.790419	1.133	0.948749
NM_001081013	Rlf	176	5603	6585	14.8104	21	1	22	3	44	0	20	19	44	41.6524	49.8088	35.0437	0.852183	0.931684	1.02032	0.934728
NM_001039106	Ddhd1	132	2703	5015	9.43532	6	0	6	0	27	2	6	6	25	26.3766	33.2018	42.0296	0.472742	0.625053	1.62929	0.909029
NM_213614	Sept5	88	1198	2127	125.666	13	2	11	4	36	0	11	7	36	112.005	89.7197	140.183	0.952767	0.459841	1.37602	0.929543
NM_146073	Zdhhc14	847	2317	3115	10.0301	4	0	4	0	12	0	4	4	12	30.7548	38.7129	35.2843	0.656371	0.808843	1.3299	0.931706
NM_010806	Mllt4	133	5596	7383	23.7333	29	1	21	4	70	1	28	17	69	57.9291	44.2721	54.5928	1.03554	0.470394	1.29724	0.934392
NM_001290827	Cpeb3	188	2339	5908	17.6641	8	0	8	0	21	0	8	8	21	42.0358	52.913	42.1984	0.75609	0.910057	1.15285	0.939664
NM_001167883	Ankrd50	928	1759	4915	5.72731	2	0	2	0	4	0	2	2	4	27.2019	34.2406	20.8054	0.826882	0.977874	0.99875	0.934502
NM_001082414	Sh3d19	233	2603	6414	2.24076	6	1	3	2	14	1	5	1	13	23.8447	6.00294	23.709	1.21901	-0.954406	1.90889	0.724499
NM_001099328	Zfp831	0	4887	9807	9.58471	14	1	15	2	39	0	13	13	39	30.0657	37.8454	34.4937	0.651855	0.804207	1.33214	0.9294
NM_172650	Kctd3	228	2676	3703	34.4289	11	1	16	2	34	0	10	14	34	46.1698	81.3634	60.0323	0.477418	1.11857	1.14818	0.914725
NM_019681	Ncs1	256	829	4036	73.9038	2	0	6	1	16	1	2	5	15	39.4498	124.145	113.15	-0.223387	1.25629	1.47518	0.836027
NM_146155	Ahdc1	650	5435	6602	15.0512	16	2	17	0	49	1	14	17	48	33.0686	50.5452	43.3587	0.50924	0.942891	1.31508	0.922404
NM_177784	Klhl23	274	1951	4617	37.483	11	2	10	2	27	2	9	8	25	60.6567	67.8687	64.4354	0.81841	0.804439	1.18494	0.935929
NM_021314	Tacc2	364	3475	3940	13.1027	7	0	12	1	32	0	7	11	32	25.4312	50.3043	44.4598	0.216384	1.02164	1.45787	0.898632
NM_013735	Trp53bp1	129	6039	9624	11.2903	22	2	14	1	57	1	20	13	56	38.2483	31.2945	40.956	0.897533	0.428829	1.45393	0.926766
NM_198170	Szt2	74	10370	10958	2.39118	15	0	15	1	43	1	15	14	42	16.4662	19.3452	17.6319	0.64454	0.693688	1.43168	0.923303
NM_181347	Dennd1b	251	2327	8072	1.50935	5	0	1	0	6	0	5	1	6	27.2215	6.85307	12.4923	1.65522	-0.519241	1.28836	0.808114
NM_001287165	Nup98	177	3690	4064	10.902	12	2	10	0	30	1	10	10	29	32.173	40.4981	35.681	0.669699	0.822391	1.28193	0.924673
NM_010092	Dyrk1b	259	2029	2404	9.56017	8	2	5	1	13	0	6	4	13	38.3131	32.1514	31.7459	1.00317	0.570551	1.21435	0.929356
NM_207213	Snx25	63	2586	3067	30.8905	8	1	17	0	34	1	7	17	33	31.3581	95.8615	56.5346	-0.0134157	1.42214	1.14497	0.851232
NM_019990	Stard10	147	1023	1198	4.92719	1	0	3	0	4	0	1	3	4	12.9023	48.7225	19.7366	-0.15585	1.57971	1.03839	0.820748
NM_178076	Mcf2l	83	3611	5253	27.8701	16	1	23	5	42	3	15	18	39	48.0543	72.5866	47.7808	0.66624	1.08445	0.981399	0.910695
NM_152234	Ubqln1	217	1882	3602	64.1177	11	0	13	1	28	1	11	12	27	74.6703	102.537	70.0917	0.785247	1.06815	0.893494	0.915631
NM_001081161	Fam171a1	168	2847	4146	23.3761	18	1	11	0	18	0	17	11	18	71.7209	58.4161	29.0414	1.35305	0.87973	0.398303	0.877029
NM_001271589	Eps8	105	1791	3562	3.60906	4	0	3	2	13	1	4	1	12	26.8146	8.4383	30.7639	1.09268	-0.757549	1.91816	0.751097
NM_178923	Scaf4	393	4023	4182	2.91689	8	2	4	0	20	0	6	4	20	18.6816	15.6771	23.8145	0.703369	0.267616	1.71251	0.894497
NM_178888	Garnl3	115	3097	3387	9.13821	7	0	8	1	27	0	7	7	27	26.5314	33.3967	39.1357	0.501033	0.653259	1.55098	0.901757
NM_022882	Lpin2	112	2794	5641	27.1669	11	1	12	1	41	0	10	11	41	42.1416	58.3508	66.0758	0.492674	0.785282	1.46874	0.915567
NM_015731	Atp9a	51	3195	3529	215.66	33	5	40	3	127	3	28	37	124	100.657	167.429	170.473	0.463607	1.02628	1.24292	0.910937
NM_198942	Dhx57	427	4435	4918	16.6195	13	1	18	1	39	3	12	17	36	33.8394	60.344	38.8233	0.480994	1.1373	1.07946	0.89925
NM_146145	Jak1	316	3778	5299	72.7248	26	1	30	3	56	1	25	27	55	81.6174	110.956	68.6678	0.835447	1.10418	0.767017	0.902216
NM_013649	Ryk	136	1921	3267	4.03707	5	0	2	0	9	0	5	2	9	31.6593	15.9406	21.7932	1.26276	0.0909032	1.33462	0.896095
NM_029365	Med25	2	2240	2271	9.15669	5	0	7	0	16	0	5	7	16	25.2511	44.499	30.9013	0.428423	1.06608	1.20861	0.901037
NM_133808	Hdlbp	307	4114	6347	46.4015	29	3	18	3	72	2	26	15	70	77.1898	56.0559	79.4754	1.03374	0.39671	1.32345	0.917966
NM_172683	Pogz	175	4405	7642	8.51534	11	1	11	1	35	0	10	10	35	26.7196	33.6335	35.7639	0.555023	0.707063	1.47529	0.912457
NM_001159633	Slc44a1	271	1852	1938	9.36644	3	0	6	1	13	0	3	5	13	21.4466	44.9936	35.5409	0.17878	1.06804	1.393	0.87994
NM_008808	Pdgfa	182	773	1019	9.96048	1	0	3	0	3	0	1	3	3	19.1241	72.2182	21.9407	-0.0247219	1.71269	0.649845	0.779272
NM_019930	Ranbp9	45	2178	3064	32.9351	11	1	9	0	33	0	10	9	33	52.9881	60.0294	66.8714	0.703654	0.707263	1.33794	0.916287
NM_001302266	Aktip	198	1077	2149	19.6866	3	0	5	1	8	0	3	4	8	38.5746	64.7416	39.3386	0.564876	1.13417	0.968237	0.889093
NM_001081306	Ptprz1	325	7264	8068	4.81991	15	3	14	4	55	2	12	10	53	19.5458	20.5029	33.0139	0.457044	0.344545	1.79751	0.866367
NM_001293668	Atp11a	298	3712	7528	5.35926	6	0	6	0	25	0	6	6	25	19.8636	25.0035	31.6515	0.414506	0.565322	1.65514	0.878323
NM_008832	Phka1	322	4048	6115	1.91225	6	0	7	2	12	2	6	5	10	18.2003	19.0915	11.6004	0.927652	0.812712	0.999558	0.913307
NM_146014	Ccm2	113	1475	1875	9.98777	6	1	5	1	7	0	5	4	7	41.4918	41.7826	22.2146	1.09101	0.921544	0.665636	0.892731
NM_001085508	Tmem8b	1050	2469	4775	16.8119	2	1	7	0	21	0	1	7	21	7.96503	70.1824	63.9667	-1.6131	1.34809	1.79101	0.508665
NM_175930	Rapgef5	645	3090	3987	44.363	16	3	11	1	53	3	13	10	50	60.0944	58.188	88.3911	0.700431	0.478319	1.51139	0.896714
NM_001162906	2410089E03Rik	521	10166	10469	4.08271	18	0	18	2	51	0	18	16	51	21.0931	23.601	22.8552	0.669929	0.650102	1.39462	0.904883
NM_026482	Atp2b1	443	4106	7130	374.071	65	9	52	5	170	2	56	47	168	172.791	182.547	198.239	0.901521	0.810787	1.03709	0.916465
NM_001033463	Tatdn2	109	2278	2646	16.8217	2	0	12	0	27	0	2	12	27	10.4217	78.7108	53.8049	-1.22562	1.51318	1.54097	0.609511
NM_001033422	Thoc2	30	4815	7619	9.15559	16	1	13	2	36	2	15	11	34	35.4306	32.7057	30.7124	0.917151	0.621923	1.19985	0.912976
NM_029665	Ipo11	162	3090	4282	25.1159	13	2	15	1	34	1	11	14	33	42.4611	68.0252	48.7147	0.552268	1.05509	1.08935	0.8989
NM_176999	Atp10b	99	4524	6908	1.41138	1	1	8	0	18	0	0	8	18	1	25.7211	17.5823	-3.06983	1.43034	1.83306	0.0645261
NM_199065	Slitrk1	962	3053	4252	33.8813	12	0	13	1	18	0	12	12	18	64.863	81.6469	37.208	0.977808	1.1335	0.470384	0.860562
NM_181732	Aida	459	1377	3293	5.45242	2	0	1	0	8	0	2	1	8	24.6239	15.4978	37.6673	0.71375	-0.135388	1.89293	0.823764
NM_011643	Trpc1	471	2901	4574	16.806	18	1	6	0	14	0	17	6	14	79.0701	35.1283	24.9023	1.6985	0.349833	0.430231	0.826188
NM_001033430	Kdm7a	139	2962	9553	16.7264	14	2	9	1	28	1	12	8	27	48.0441	40.3173	41.34	0.982671	0.551531	1.16514	0.899782
NM_001190187	Nrg3	288	2427	4009	11.1354	10	0	5	1	17	2	10	4	15	52.8395	26.6049	30.3108	1.37233	0.203147	1.03032	0.868597
NM_016962	Spast	50	1892	4693	18.9053	9	1	7	0	16	1	8	7	15	49.0874	54.0656	35.1981	0.937698	0.899199	0.838932	0.891943
NM_153484	Tef	111	969	4151	97.7272	10	0	5	0	16	0	10	5	16	131.729	82.9078	80.6028	1.34276	0.501246	0.77097	0.871659
NM_183020	Atxn2l	110	3260	3718	11.3674	10	2	7	2	44	1	8	5	43	28.7044	22.5825	59.0032	0.479192	-0.0460771	1.97542	0.802845
NM_184088	Dennd4c	375	6096	7793	1.79334	6	1	8	2	28	1	5	6	27	9.87797	14.9208	20.399	0.0858061	0.496765	1.86325	0.815273
NM_172257	Sidt2	343	2842	4239	13.5084	6	2	10	2	33	0	4	8	33	18.091	45.5445	57.0775	-0.293858	0.859401	1.79485	0.786797
NM_001136104	Abl2	262	3499	10402	18.1636	14	1	7	1	49	0	13	6	49	45.3911	26.3707	65.4291	0.849581	-0.111856	1.76414	0.833956
NM_174852	Phf12	496	3508	4393	6.47971	4	1	9	1	27	1	3	8	26	11.2573	37.7875	37.3109	-0.522527	1.04383	1.74647	0.755923
NM_009409	Top2b	473	5312	5633	60.2179	39	5	27	10	128	3	34	17	125	79.4132	49.9811	111.653	0.91302	0.0702264	1.61346	0.865569
NM_181073	Plekhh1	306	4377	6439	2.79213	4	0	8	1	21	1	4	7	20	11.1053	24.463	21.2347	-0.0198879	0.936561	1.58071	0.832461
NM_144557	Myrip	161	2732	4762	14.1541	7	0	8	1	30	0	7	7	30	30.7727	38.7354	50.4355	0.44355	0.596931	1.58045	0.873645
NM_001081141	Gabbr2	289	3112	3998	69.3688	24	2	15	4	75	2	22	11	73	88.0808	55.4363	111.771	0.974708	0.132288	1.50619	0.871062
NM_016902	Nphp1	37	2113	2297	7.22278	2	0	7	0	16	0	2	7	16	10.8886	47.9715	33.3127	-0.637924	1.32104	1.49946	0.727523
NM_001302637	Cacna1d	495	7035	9167	4.47671	10	2	16	0	37	2	8	16	35	13.8255	34.8061	23.1317	0.00334282	1.15368	1.34112	0.832714
NM_172755	Sugp2	442	3646	3881	33.3029	17	0	13	1	49	1	17	12	48	59.9689	53.2846	64.7539	0.87531	0.528451	1.28298	0.895581
NM_027478	Tmem230	236	599	1593	8.11656	1	0	1	0	2	0	1	1	2	31.136	39.1928	23.8145	0.805466	0.957379	0.925503	0.896116
NM_001111052	Dclk1	306	1575	7016	170.852	14	0	12	0	35	0	14	12	35	124.691	134.534	119.213	0.916999	0.854568	0.906024	0.89253
NM_001271857	Add2	402	2580	8208	108.675	23	1	18	2	46	1	22	16	45	114.165	104.514	89.3042	1.07044	0.769771	0.837211	0.892472
NM_029436	Klhl24	242	2045	6683	24.7885	8	0	9	0	16	1	8	9	15	50.1492	71.0165	35.9594	0.800491	1.12528	0.661448	0.862406
NM_181417	Csrp2bp	529	2869	3748	9.07714	9	0	7	0	9	0	9	7	9	43.4707	42.5593	16.6243	1.21753	1.00717	0.320944	0.848551
NM_001081132	Upf2	103	3913	5174	14.3505	19	3	12	3	35	0	16	9	35	47.464	33.607	39.7064	1.06019	0.383531	1.22479	0.889504
NM_033526	Ubqln4	89	1880	3372	29.4704	8	0	9	3	29	0	8	6	29	50.4852	47.6616	69.9874	0.7028	0.443082	1.48913	0.878337
NM_022312	Tnr	609	4686	5395	39.7778	23	4	21	3	76	3	19	18	73	52.6723	62.8123	77.3926	0.577924	0.656033	1.40358	0.87918
NM_178615	Rgmb	430	1741	2633	14.0668	5	0	3	0	13	0	5	3	13	43.1059	32.556	42.8606	0.933625	0.350025	1.35043	0.878025
NM_011866	Pde10a	334	2725	7717	12.5551	8	1	7	0	22	1	7	7	21	33.0893	41.6515	37.9627	0.622632	0.775697	1.26278	0.887038
NM_027910	Klhdc3	441	1590	2126	39.1962	8	0	3	1	26	0	8	2	26	78.6936	24.7641	97.8072	1.16626	-0.677664	1.75265	0.747085
NM_001042623	Phc1	104	2981	3743	5.74652	7	1	4	0	25	2	6	4	23	23.5712	19.7803	34.5546	0.618123	0.184161	1.72809	0.843459
NM_026910	Tnik	429	4512	7115	34.7811	23	2	23	3	53	3	21	20	50	58.1312	69.6888	52.9307	0.803468	0.888835	0.958724	0.883675
NM_198022	Tnrc6c	435	6138	8726	11.6264	16	2	18	2	56	2	14	16	54	27.7456	39.9144	40.9268	0.416199	0.761706	1.43035	0.869417
NM_144925	Tnrc6a	443	6134	8479	3.79982	13	0	9	2	29	1	13	7	28	25.8181	17.4994	21.266	1.00609	0.262913	1.34587	0.871623
NM_001163774	Taok2	1097	4265	4986	37.1723	22	1	14	3	49	3	21	11	46	74.921	49.3992	62.761	1.12828	0.351323	1.15335	0.877651
NM_025852	Rexo1	140	3782	5249	9.01082	11	1	14	0	14	0	10	14	14	31.0334	54.6891	16.6152	0.735865	1.37348	0.325791	0.811712
NM_007712	Clk2	312	1812	2320	5.88167	4	0	4	0	5	0	4	4	5	30.1397	37.9386	14.4077	0.958341	1.1094	0.448184	0.838643
NM_130885	Oxr1	148	2485	4240	100.562	22	4	16	1	64	0	18	15	64	87.0529	91.3156	118.369	0.72741	0.622937	1.30337	0.884574
NM_001081419	Dip2a	94	4783	6355	14.254	11	0	18	4	56	1	11	14	55	26.5144	42.4776	50.699	0.224314	0.725638	1.58257	0.844173
NM_011213	Ptprf	343	6040	7648	9.08509	16	0	12	2	54	2	16	10	52	31.7427	24.9728	39.4525	0.763373	0.237512	1.56709	0.855992
NM_001024931	Rbfox3	586	1528	3007	33.5927	5	1	4	0	16	1	4	4	15	47.9931	60.4118	68.8268	0.548547	0.704211	1.36432	0.87236
NM_011065	Per1	186	4062	4663	15.6614	17	1	12	3	40	0	16	9	40	46.6558	33.0348	44.606	0.98118	0.304754	1.32543	0.870456
NM_001033348	Ralgapa2	105	5838	9613	2.30627	9	0	8	1	21	0	9	7	21	17.7431	17.3712	15.8327	0.774725	0.560744	1.30421	0.879891
NM_177301	Hnrnpl	21	1782	2142	66.1837	15	0	10	1	30	0	15	9	30	96.2723	72.7103	73.6341	1.13216	0.55265	0.940236	0.875015
NM_001040400	Tet2	382	6121	9181	3.07277	9	1	11	1	25	1	8	10	24	15.7552	24.79	18.0756	0.425281	0.896556	1.27467	0.865504
NM_144843	Mtmr6	133	1987	3837	52.8633	16	2	10	2	32	1	14	8	31	85.3469	61.3893	72.2719	1.09779	0.447296	1.08611	0.877066
NM_178027	Vps26b	473	1484	6873	35.2434	3	0	7	0	13	0	3	7	13	33.5382	98.5053	55.5788	0.00176765	1.37995	1.019	0.800239
NM_178029	Setd1a	140	5291	5934	4.41532	13	2	10	1	24	0	11	9	24	24.1363	24.8579	20.139	0.815778	0.676576	1.15185	0.881402
NM_001290636	Dock7	153	6540	7139	5.18368	21	3	11	1	32	1	18	10	31	31.8526	22.2749	20.9789	1.11646	0.419189	1.08742	0.874357
NM_181400	Wdr47	329	3092	4223	63.0158	27	3	21	3	32	1	24	18	31	98.1748	92.6839	48.4951	1.19082	0.933108	0.375421	0.833116
NM_026402	Atg3	271	1216	2013	12.7493	2	0	5	1	7	0	2	4	7	23.9204	60.22	32.0172	0.144985	1.29809	1.00525	0.816108
NM_178795	Ppip5k1	125	4436	5531	25.0321	12	2	21	1	67	1	10	20	66	26.2175	66.0031	66.1734	-0.14127	1.01362	1.53381	0.802052
NM_019715	Kcmf1	350	1496	3251	12.6294	4	1	4	0	9	0	3	4	9	29.5874	49.6579	33.945	0.457589	1.02571	1.09686	0.860053
NM_172477	Dennd2a	390	3393	4435	4.3524	7	0	5	0	13	0	7	5	13	26.3459	23.6879	18.7114	0.951054	0.615893	1.05682	0.874587
NM_001185164	Vegfb	240	807	1181	2.23943	1	0	0	1	4	0	1	-1	4	19.9336	1	30.4926	0.960916	-3.53971	2.27238	-0.102139
NM_001201413	Apbb2	571	2848	6665	9.34507	5	0	4	0	25	0	5	4	25	24.8186	24.9925	47.4564	0.390866	0.221223	1.81188	0.807989
NM_007830	Dbi	143	407	587	28.0062	1	0	2	1	4	0	1	1	4	42.812	53.8901	65.4898	0.49657	0.651754	1.43249	0.860272
NM_145528	Atg13	359	1799	3573	15.3767	4	0	6	1	14	0	4	5	14	31.3955	49.3992	42.0226	0.421062	0.89659	1.25347	0.857041
NM_207239	Gtf3c1	11	6317	6869	43.7722	33	4	38	2	103	5	29	36	98	51.9773	81.2197	67.1722	0.499399	0.967707	1.12567	0.864257
NM_001081225	Fam178a	192	3684	6880	8.33506	13	0	8	2	23	1	13	6	22	42.0764	24.445	27.2311	1.22341	0.25992	1.09849	0.860609
NM_153521	Lrrc41	140	2564	3131	17.5773	15	0	5	0	21	1	15	5	20	69.9404	29.3461	35.6627	1.49366	0.0626469	0.913863	0.823388
NM_026670	Zmym1	332	3284	3832	4.69794	7	0	7	1	12	1	7	6	11	26.801	28.9166	16.1062	0.928372	0.856448	0.781769	0.85553
NM_001112700	Cyth1	66	1269	3119	22.6738	10	0	4	1	9	1	10	3	8	93.9516	35.4787	28.7436	1.7615	0.179162	0.406895	0.78252
NM_010771	Matr3	316	2857	4472	265.642	29	2	36	3	94	3	27	33	91	120.096	184.766	154.794	0.589031	1.03966	0.943424	0.857373
NM_013625	Pafah1b1	564	1797	5517	210.364	11	2	19	2	40	0	9	17	40	82.4991	196.155	140.221	0.192027	1.27008	0.9802	0.814101
NM_175375	Ankhd1	135	7782	8231	9.46827	23	1	21	6	69	4	22	15	65	32.5163	27.907	36.74	0.772485	0.372263	1.43256	0.859102
NM_173446	Fam155a	5	1409	3142	31.8846	5	0	7	0	20	0	5	7	20	40.2506	70.9322	61.5716	0.327104	0.968058	1.24375	0.846303
NM_028887	Smchd1	179	6203	7053	11.5616	22	1	16	3	53	2	21	13	51	39.4007	30.7023	36.5934	0.925628	0.386598	1.27318	0.861802
NM_009790	Calm1	279	729	4125	1053.18	19	7	8	0	32	0	12	8	32	301.397	252.924	307.365	1.06201	0.641813	0.873771	0.859198
NM_001024927	Pitpnm3	214	3139	6666	7.02933	9	0	6	2	21	0	9	4	21	34.7765	19.4557	31.0321	1.05421	0.0358209	1.41802	0.836019
NM_198107	Med16	43	2641	3218	15.7216	13	1	4	0	31	0	12	4	31	52.205	21.9045	51.5751	1.14093	-0.290372	1.53192	0.794161
NM_011750	Sf1	398	2045	3723	12.1505	6	1	4	0	15	0	5	4	15	34.312	34.5525	39.3654	0.695301	0.526351	1.34032	0.853992
NM_177341	Trpm3	75	4089	5157	10.3496	17	1	7	4	49	3	16	3	46	45.0518	10.633	49.5334	1.1877	-1.07479	1.79517	0.636024
NM_201646	Btbd6	43	1663	2067	14.7369	5	1	5	0	18	0	4	5	18	27.9071	43.9104	48.0258	0.277499	0.752916	1.4788	0.836403
NM_145525	Osbpl6	502	3406	8071	15.5068	5	0	15	2	30	1	5	13	29	19.46	63.6883	43.1637	-0.274209	1.25793	1.28565	0.756454
NM_001159404	Llgl1	171	3282	4425	4.9571	6	0	6	1	21	2	6	5	19	21.7982	22.8656	26.398	0.596982	0.484558	1.45329	0.844942
NM_021366	Klf13	369	1239	6396	36.2619	2	0	6	1	16	0	2	5	16	25.9825	81.7642	79.491	-0.384173	1.09362	1.51335	0.740931
NM_001033261	Zfc3h1	239	6218	6956	9.44341	23	3	11	0	46	1	20	11	45	37.8069	26.1744	32.5313	0.991602	0.281418	1.25906	0.844026
NM_010322	Gnpat	205	2242	2984	18.021	9	0	6	0	21	3	9	6	18	49.9368	41.9057	38.1943	0.992166	0.561224	0.99363	0.849007
NM_011207	Ptpn3	183	2925	6369	16.3365	9	0	11	0	20	0	9	11	20	37.0975	57.0739	31.5268	0.624266	1.06753	0.792322	0.82804
NM_007698	Chrm1	524	1907	6198	44.4402	11	1	4	0	26	1	10	4	25	81.7236	41.1482	78.1331	1.14287	-0.0226495	1.33209	0.817438
NM_173423	Fem1c	538	2392	2866	8.04612	6	0	5	2	13	0	6	3	13	36.5773	23.021	30.3076	1.04324	0.195126	1.28005	0.839469
NM_134105	Txndc11	138	1113	1220	7.73223	1	0	3	0	8	0	1	3	8	11.5922	43.7753	35.4652	-0.589874	1.14687	1.53737	0.698125
NM_026542	Slc25a39	143	1223	1674	8.05822	1	0	5	1	8	0	1	4	8	10.4652	52.6925	32.0172	-0.763049	1.38884	1.35806	0.661285
NM_172015	Iars	81	3870	4396	16.7117	17	1	14	2	30	1	16	12	29	47.7271	45.0577	33.0819	0.973663	0.712446	0.84432	0.843476
NM_001081229	Tsc22d2	0	2310	8829	5.47421	4	0	5	0	13	0	4	5	13	19.5712	30.7943	24.3248	0.379949	0.852749	1.25898	0.830558
NM_029036	S100pbp	230	1421	1546	7.36926	5	0	2	0	5	0	5	2	5	47.4491	23.8908	18.1458	1.47318	0.302912	0.607578	0.794558
NM_001291017	Pdxdc1	210	2580	3821	35.9643	12	1	11	1	37	1	11	10	36	52.4583	60.0294	65.6556	0.634571	0.652912	1.24381	0.843764
NM_008800	Pde1b	352	1960	3222	40.0389	14	1	6	0	18	1	13	6	17	91.3749	53.0857	45.6962	1.36862	0.40927	0.638431	0.80544
NM_027135	Sec24d	83	3182	3857	6.92811	9	1	6	1	22	0	8	5	22	29.1768	22.9541	30.6845	0.80992	0.283342	1.41292	0.835395
NM_145456	Zswim6	15	3639	5457	9.33082	15	2	5	0	31	0	13	5	31	40.5438	19.6288	36.9735	1.09988	-0.126355	1.45294	0.808822
NM_028194	Fryl	598	9622	11470	6.08474	18	3	23	6	70	3	15	17	67	18.7872	26.8017	32.0917	0.255371	0.587095	1.57744	0.806635
NM_007497	Atf1	230	1040	2329	1.72753	0	0	1	0	5	0	0	1	5	1	17.5642	26.681	-3.19522	0.755169	2.27931	-0.0535787
NM_001190846	Kat2b	39	2247	4100	2.04944	4	2	3	0	9	0	2	3	9	10.2377	19.3301	17.6182	0.0545927	0.787832	1.54916	0.797194
NM_001110783	Ank1	300	6024	8267	4.97027	15	1	12	4	31	0	14	8	31	27.6438	19.884	23.4088	0.938083	0.281345	1.27787	0.832432
NM_011960	Parg	275	3161	4391	28.5837	17	2	15	1	25	2	15	14	23	58.7441	69.0151	34.4468	0.940336	0.996038	0.489896	0.808757
NM_009194	Slc12a2	129	3750	6520	6.82699	6	0	12	3	24	0	6	9	24	18.728	35.3612	28.6484	0.179418	0.915836	1.32518	0.80681
NM_178404	Zc3h6	403	3937	4916	6.94457	9	0	7	0	23	2	9	7	21	28.7836	28.1802	25.6844	0.788873	0.577804	1.15449	0.840387
NM_001163455	Tbck	279	2961	6578	14.5311	5	1	15	0	20	1	4	15	19	16.8566	79.5692	30.6205	-0.441089	1.61925	0.8403	0.672821
NM_009717	Neurod6	321	1335	2154	131.521	10	0	10	0	17	0	10	10	17	111.463	140.305	72.465	0.917514	1.07678	0.389039	0.794446
NM_017374	Ppp2cb	296	1226	1836	36.6648	8	1	3	1	16	1	7	2	15	85.0716	30.5956	69.7149	1.32011	-0.331346	1.31552	0.768097
NM_207636	Fndc3a	325	3922	6136	9.94444	9	1	12	1	25	0	8	11	25	25.1373	43.5076	30.0412	0.370714	0.982594	1.10441	0.819241
NM_009696	Apoe	201	1137	1273	66.345	4	2	17	9	24	1	2	8	23	24.1504	121.598	106.211	-0.864427	1.29304	1.46685	0.63182
NM_001177884	Whsc1	29	1976	7790	17.8916	7	1	7	1	23	1	6	6	22	34.8301	43.8428	48.8398	0.476868	0.630869	1.35387	0.820537
NM_133857	Usp53	683	3893	4014	4.74266	6	0	8	0	11	0	6	8	11	21.1259	35.4566	14.8117	0.579222	1.14475	0.653603	0.792526
NM_001081353	2210408I21Rik	96	1071	1749	7.22912	4	0	1	0	6	0	4	1	6	46.3687	14.5918	26.5989	1.45186	-0.396529	1.17408	0.743137
NM_027694	Golga7b	433	937	2823	31.4845	3	0	2	0	5	0	3	2	5	67.276	56.4563	42.8802	1.07602	0.646552	0.731507	0.818027
NM_172442	Dtx4	779	2630	5770	7.9805	6	0	6	1	7	0	6	5	7	36.6365	38.4305	16.3459	1.05065	0.939486	0.395595	0.795244
NM_009483	Kdm6a	431	4706	5935	4.85109	8	1	9	1	24	0	7	8	24	18.5068	26.6236	24.2657	0.374239	0.717437	1.3484	0.813358
NM_001290683	Smap1	211	1279	2083	18.138	4	0	5	0	7	1	4	5	6	42.331	66.6057	24.2827	0.749762	1.22573	0.335227	0.770239
NM_001099299	Ajap1	673	1912	3067	13.0758	4	0	5	2	12	1	4	3	11	36.4887	34.4479	38.3741	0.738506	0.476641	1.24709	0.820744
NM_001168321	Bcor	106	5230	6119	4.2423	16	1	9	4	24	0	15	5	24	33.0866	13.8827	20.2451	1.29562	-0.139146	1.19018	0.782216
NM_145732	Ctnna2	355	3073	3986	52.9493	17	2	14	0	51	4	15	14	47	62.3751	73.281	74.7422	0.644411	0.701742	1.13335	0.826502
NM_001252332	Sept8	274	1564	4447	43.758	13	1	4	1	20	1	12	3	19	105.138	33.086	63.6621	1.51594	-0.327701	1.04849	0.745574
NM_001083320	Magi1	618	4386	7181	8.42428	14	1	10	3	22	0	13	7	22	38.9944	26.4302	25.2365	1.10706	0.365989	0.980561	0.817871
NM_010199	Fgf12	228	774	5408	30.2409	4	0	2	0	4	0	4	2	4	82.8013	52.1135	31.6654	1.40058	0.555969	0.325093	0.760548
NM_024212	Rpl4	44	1304	1422	201.126	11	1	19	4	41	2	10	15	39	89.7014	169.369	133.786	0.34064	1.08599	0.94696	0.791198
NM_153780	2610044O15Rik8	139	406	1776	5.54532	2	0	0	0	1	0	2	0	1	84.662	1	16.1885	2.48492	-4.09982	0.661591	-0.317767
NM_001252497	Rapgef6	904	2719	2827	10.245	4	2	8	1	15	0	2	7	15	12.4544	54.8699	35.7217	-0.660936	1.29895	1.33137	0.656461
NM_175028	Adnp2	130	3628	4188	9.88759	9	0	10	1	27	2	9	9	25	29.0799	36.6046	30.8914	0.584459	0.736893	1.14909	0.82348
NM_001079849	Paip1	112	1216	4458	21.8312	4	0	6	2	12	0	4	4	12	40.9506	51.547	46.9818	0.586963	0.741489	1.14488	0.824443
NM_011492	Stk11	815	2126	2569	11.9559	3	0	4	0	11	0	3	4	11	25.8636	43.408	36.2666	0.297527	0.8655	1.23446	0.799161
NM_183188	Rbfox1	164	1418	4085	101.749	15	1	7	0	24	1	14	7	23	126.183	79.4169	79.2771	1.25568	0.414272	0.71603	0.795327
NM_008636	Mtf1	146	2174	7631	5.25806	5	0	6	1	6	0	5	5	6	27.8658	35.0764	12.7879	0.914703	1.06547	0.362314	0.780829
NM_146241	Trhde	70	3148	5722	12.3752	10	1	10	3	30	1	9	7	29	33.0479	32.355	40.7237	0.629776	0.420233	1.37517	0.808392
NM_029409	Mff	344	1220	1894	71.0479	9	1	4	1	20	1	8	3	19	103.218	48.7225	93.749	1.18867	-0.0687286	1.23413	0.784688
NM_177561	Usp46	126	1227	3225	48.793	8	2	5	0	20	1	6	5	19	61.5933	64.6093	74.5905	0.676927	0.570543	1.19329	0.813586
NM_001033481	Myrf	144	3483	5597	1.97982	7	1	2	3	19	0	6	-1	19	20.3097	1	24.5954	1.06432	-3.4636	2.05706	-0.114071
NM_030180	Usp54	739	5506	6495	4.05862	7	0	8	0	29	4	7	8	25	16.5967	23.8758	22.6679	0.327729	0.670456	1.3873	0.79516
NM_010600	Kcnh1	231	3201	7239	7.77625	9	1	5	1	25	0	8	4	25	30.4441	19.1609	36.3832	0.799616	-0.0485845	1.56988	0.773636
NM_001289916	Rora	180	1584	10869	4.74675	5	0	2	1	7	0	5	1	7	40.2506	10.1332	21.5501	1.50868	-0.662749	1.19389	0.679942
NM_170669	Rps15a	17	410	5136	17.4747	1	2	2	0	7	0	-1	2	7	1	72.4019	76.988	-4.63077	1.36912	2.02858	-0.411023
NM_021516	Mark3	541	2776	3388	33.843	17	2	7	1	31	1	15	6	30	75.8548	38.1932	58.0178	1.20436	0.0381126	1.11214	0.784869
NM_019790	Tmeff2	425	1550	3339	17.7562	5	0	4	0	7	0	5	4	7	50.2328	50.5848	26.8945	1.00988	0.841928	0.498968	0.783591
NM_001085408	Sdccag3	98	1178	1976	9.9367	2	0	3	2	17	0	2	1	17	20.9303	13.1731	68.0366	0.106959	-0.740594	2.28438	0.550249
NM_010277	Gfap	83	1376	2717	16.0171	3	0	4	2	24	1	3	2	23	26.2236	22.0062	76.8859	0.136058	-0.295196	2.09365	0.644836
NM_172694	Megf9	106	1909	3062	34.1881	11	1	6	0	26	1	10	6	25	62.6865	47.3444	59.9324	0.922975	0.341721	1.15118	0.805291
NM_026574	Ino80	294	4974	6296	5.45682	6	0	17	4	24	1	6	13	23	14.4902	39.5194	21.2422	-0.0517313	1.21461	1.06593	0.742936
NM_001159637	Nadk	191	1511	3037	15.1884	5	1	6	1	9	0	4	5	9	34.2496	53.8901	29.4704	0.554234	1.02973	0.751044	0.778336
NM_001198861	Ctbp1	412	1705	2482	65.4319	10	0	7	0	19	0	10	7	19	87.412	77.0215	63.5144	0.999957	0.64281	0.735732	0.792833
NM_009282	Stag1	247	4024	6010	7.35445	13	0	9	2	17	0	13	7	17	38.9015	26.3672	19.4545	1.18787	0.446442	0.709593	0.781303
NM_172690	Phf24	295	1387	3393	54.3686	5	0	9	0	12	0	5	9	12	51.7508	117.255	47.4981	0.358612	1.36355	0.458956	0.727038
NM_029090	Naa60	194	923	2425	13.4096	1	0	5	0	3	0	1	5	3	15.5039	97.5787	17.7873	-0.511944	1.96322	0.118421	0.523233
NM_173756	Lin52	5	356	2144	5.6747	2	0	0	0	2	0	2	0	2	64.401	1	24.6286	2.07598	-4.11406	1.24922	-0.262952
NM_026198	Tmem167b	186	411	2864	19.4207	2	0	1	0	0	1	2	1	-1	100.466	63.231	1	1.95429	1.10851	-4.31918	-0.418794
NM_001163513	Dlg5	470	6236	7853	4.72797	11	1	10	1	34	1	10	9	33	19.6018	22.2065	24.7375	0.473114	0.471596	1.39595	0.780221
NM_172804	Syt16	90	1740	2705	43.2337	12	0	7	1	21	0	12	6	21	82.1991	51.7345	55.0114	1.16832	0.32465	0.847051	0.780006
NM_008417	Kcna2	681	2181	11582	26.8392	9	2	5	1	22	1	7	4	21	52.7444	37.9386	60.5125	0.823977	0.171694	1.35119	0.782287
NM_027513	Nup205	16	6043	6229	5.8652	16	2	9	0	37	0	14	9	37	26.2541	21.2449	26.5349	0.760958	0.274583	1.33139	0.788976
NM_001033166	2700094K13Rik	122	473	685	6.90076	1	0	1	0	1	0	1	1	1	32.2005	40.5327	12.3143	0.954633	1.10612	0.0987938	0.719848
NM_021350	Chml	0	1866	6117	2.48081	3	0	2	0	8	1	3	2	7	18.171	15.2486	16.2145	0.763847	0.327666	1.28248	0.791332
NM_029972	Ermn	36	882	3521	1.91711	0	0	2	0	3	0	0	2	3	1	33.6335	15.3274	-3.25981	1.62811	1.39954	-0.0773881
NM_176930	Nrcam	542	4313	7572	78.2405	30	3	29	4	63	2	27	25	61	80.9239	94.3183	69.9183	0.777785	0.824652	0.736834	0.779757
NM_001285811	Dtna	345	2058	2137	15.5459	5	0	7	0	11	0	5	7	11	32.99	58.1371	27.7557	0.485745	1.1248	0.646676	0.752407
NM_001267622	Ttc28	102	7455	10688	1.17469	6	1	7	1	26	0	5	6	26	7.68555	11.6091	15.2836	-0.0138026	0.396039	1.77209	0.718107
NM_007906	Eef1a2	367	1759	2046	407.21	24	3	23	5	56	1	21	18	55	170.51	183.97	170.781	0.829692	0.769556	0.756718	0.785322
NM_009076	Rpl12	91	589	638	91.8444	1	0	5	0	14	0	1	5	14	22.6955	142.841	121.511	-1.15582	1.32443	1.4109	0.526503
NM_175478	Lrfn3	856	2737	2861	5.40116	3	0	3	0	13	0	3	3	13	18.0261	22.6906	29.8725	0.269638	0.420475	1.5657	0.751938
NM_001163467	Phtf1	155	2441	2923	14.2961	16	0	5	2	14	0	16	3	14	79.1067	18.6706	26.4709	1.79951	-0.462123	0.642747	0.660043
NM_025961	Gatm	61	1333	2357	5.7171	2	2	7	4	14	0	0	3	14	1	33.5542	47.5728	-3.93764	0.949761	2.1933	-0.264861
NM_001168255	Slc45a4	470	2246	3721	9.97532	5	0	3	0	16	0	5	3	16	31.8197	24.0321	38.9399	0.708881	0.124372	1.47634	0.769863
NM_001177975	Irak1	173	2309	3835	3.3299	3	1	4	1	13	0	2	3	13	10.5827	19.9817	26.3063	-0.198685	0.535836	1.75424	0.69713
NM_025709	Gapvd1	582	4896	5966	28.0934	18	2	17	7	84	2	16	10	82	41.9189	32.9786	82.1582	0.464225	-0.058654	1.75724	0.720937
NM_177673	Cep104	76	2857	3277	7.83706	9	1	5	0	17	0	8	5	17	32.5131	25.5789	26.422	0.889643	0.363391	1.10235	0.785129
NM_011116	Pld3	523	1990	2288	279.836	22	3	17	3	54	0	19	14	54	146.384	135.772	159.104	0.842306	0.562998	0.943014	0.782773
NM_011370	Cyfip1	238	4000	6471	25.3338	17	2	15	3	47	0	15	12	47	45.0653	45.3811	54.0003	0.632783	0.465775	1.23131	0.776624
NM_178740	Slitrk4	319	2833	3935	34.7066	15	0	10	1	29	0	15	9	29	67.4366	50.9319	49.8597	1.01902	0.437801	0.874142	0.776986
NM_020494	Ddx24	94	2668	2904	92.9761	23	0	15	2	55	0	23	13	55	100.992	71.8534	92.3574	0.990348	0.32558	1.00569	0.773874
NM_020506	Xpo4	0	3456	3456	2.75051	9	0	2	0	14	1	9	2	13	29.4333	8.2332	16.2587	1.39563	-0.625237	1.20705	0.659149
NM_001081098	Zfp362	189	1446	2882	2.16391	4	1	1	0	3	0	3	1	3	26.9746	11.3182	10.3158	1.4186	-0.0179468	0.735155	0.711934
NM_026748	Ints1	208	6877	7113	15.7093	22	1	20	0	61	3	21	20	58	35.59	42.666	37.5911	0.588703	0.671971	1.07624	0.778971
NM_172120	Vps41	24	2586	3197	85.9269	30	4	14	3	50	1	26	11	49	114.7	61.0838	82.6674	1.22288	0.140018	0.906419	0.756439
NM_145711	Tox	232	1813	2852	7.14619	4	0	3	0	9	0	4	3	9	28.5955	26.9962	24.6053	0.761658	0.498197	1.07055	0.776802
NM_001289658	Agbl3	684	1074	1328	2.86282	1	0	1	0	0	0	1	1	0	28.9804	36.4794	1	1.34844	1.4976	-2.84687	-0.000277226
NM_153103	Kif1c	370	3673	6764	3.69463	4	0	8	5	27	2	4	3	25	13.6874	12.9219	32.7151	0.10797	-0.157234	1.98886	0.646532
NM_019637	Styx	287	959	4258	1.59033	0	0	1	0	3	0	0	1	3	1	21.1711	19.2961	-3.14388	1.07575	1.87545	-0.0642293
NM_133722	Abhd17c	49	1012	2238	14.1255	3	0	2	0	10	0	3	2	10	35.2099	29.5472	44.8839	0.639136	0.20755	1.41377	0.753486
NM_053100	Trim8	796	2452	3241	16.0909	4	0	5	0	18	0	4	5	18	27.3004	42.9558	46.9818	0.191261	0.66691	1.37949	0.745887
NM_001081182	Atp8b2	212	3785	5457	11.9139	11	1	11	3	31	0	10	8	31	31.6327	31.8544	37.5013	0.590204	0.421202	1.28545	0.76562
NM_175256	Heg1	146	3395	4780	1.12403	6	0	2	1	8	0	6	1	8	20.8723	4.37888	10.6428	1.45492	-0.983357	1.28388	0.585146
NM_001098233	Purg	11	989	1797	4.47729	3	0	1	0	4	0	3	1	4	34.6699	14.547	17.6782	1.32961	-0.105012	0.953118	0.725905
NM_145434	Nr1d1	629	2477	2765	19.1912	10	0	4	1	20	0	10	3	20	61.16	23.0957	46.7784	1.24562	-0.337157	1.23773	0.7154
NM_175353	Exoc6	47	2462	2737	28.1629	16	1	6	1	33	2	15	5	31	70.2011	29.4554	55.4833	1.20659	-0.223178	1.18899	0.724131
NM_198003	Zfp946	494	2066	2917	2.85185	3	0	1	0	8	0	3	1	8	21.5694	9.05024	21.9966	0.924728	-0.511085	1.61529	0.67631
NM_001033383	Zfp865	307	3484	3958	4.83649	9	1	6	0	10	0	8	6	10	28.4605	26.8687	13.605	0.997013	0.732521	0.515941	0.748492
NM_001290813	Ablim1	75	2268	6228	7.15506	7	1	3	0	15	0	6	3	15	30.923	19.4623	29.5645	0.873783	0.0253624	1.33449	0.744546
NM_008379	Kpnb1	307	2938	5909	43.2896	14	3	15	3	44	0	11	12	44	47.2543	64.8893	72.2852	0.368841	0.650707	1.24003	0.753192
NM_177284	Nrxn1	1083	5571	9004	105.247	33	4	37	2	99	1	29	35	98	73.0323	110.95	94.3823	0.445801	0.875785	0.941649	0.754412
NM_172671	Lgr4	474	3330	5060	5.85566	8	1	3	1	25	1	7	2	24	27.7019	9.96287	36.3221	0.839413	-0.816892	1.78559	0.602705
NM_001037846	Cnot2	154	1777	2816	19.7678	9	0	3	0	16	0	9	3	16	62.6749	26.2976	42.6107	1.26256	-0.168143	1.08034	0.724918
NM_001252189	Epn2	288	2040	4209	31.4118	9	2	5	0	32	2	7	5	30	45.1579	40.6021	74.0124	0.50234	0.172401	1.52074	0.731827
NM_019791	Maged1	212	2540	2752	259.522	31	0	22	5	95	2	31	17	93	150.504	103.891	172.67	0.929106	0.223438	1.11902	0.757188
NM_011818	Gmcl1	214	1789	2944	7.7311	7	0	2	0	7	0	7	2	7	50.2328	18.066	19.2103	1.52569	-0.129876	0.652965	0.682928
NM_145577	Zfp772	203	1454	2772	4.18472	3	0	2	0	4	0	3	2	4	27.104	22.745	13.8204	1.01636	0.581556	0.64991	0.749274
NM_133829	Mfsd6	347	2732	4770	33.2969	11	3	16	0	21	1	8	16	20	37.9115	95.443	36.2459	0.213843	1.36948	0.445971	0.676433
NM_177643	Zfp281	165	2847	5271	19.8596	9	0	11	1	23	0	9	10	23	37.9274	53.0461	37.0669	0.535037	0.841316	0.875696	0.750683
NM_001204875	Set	347	1181	2816	76.9513	8	0	6	0	7	0	8	6	7	108.416	102.352	36.2785	1.21003	0.95285	-0.196944	0.655313
NM_024203	Fam120b	332	2693	4519	19.0852	8	1	10	3	27	0	7	7	27	33.5098	42.1808	49.4294	0.381051	0.535222	1.32152	0.74593
NM_001081316	Dsel	1661	5285	5763	8.72193	11	2	9	2	26	0	9	7	26	28.0688	27.4804	31.0101	0.611224	0.400757	1.25108	0.754355
NM_176834	Rnf208	367	1165	1333	13.8883	4	0	1	0	7	0	4	1	7	56.6535	17.8283	37.9151	1.33582	-0.510844	1.18337	0.669449
NM_133752	Opa1	206	3089	5948	74.3775	18	2	21	4	62	2	16	17	60	62.7256	83.8913	89.9547	0.441685	0.686912	1.1393	0.755966
NM_009974	Csnk2a2	373	1426	3766	5.13815	3	0	2	0	3	0	3	2	3	32.2005	27.0218	12.3143	1.1376	0.703343	0.325606	0.722183
NM_172919	Zfp846	407	2033	2755	4.11683	7	0	2	1	5	0	7	1	5	48.6572	8.74968	13.2913	1.87065	-0.786585	0.606172	0.563412
NM_030179	Clip4	138	2253	4055	13.468	5	1	9	0	14	0	4	9	14	21.3756	60.5403	28.6111	-0.0513064	1.27187	0.800805	0.673789
NM_001005385	Gprasp1	1266	5310	5675	183.2	44	6	45	7	108	1	38	38	107	106.204	133.686	114.364	0.642191	0.802336	0.792453	0.74566
NM_153679	Cpt1c	270	2667	2794	37.2663	16	0	13	1	18	2	16	12	16	75.4435	71.2239	28.8516	1.13673	0.877635	0.030191	0.68152
NM_001163126	Cog5	21	2511	2997	19.1248	14	0	4	0	25	0	14	4	25	63.5475	22.8546	43.3968	1.30302	-0.35016	1.13215	0.695001
NM_001033242	Cln5	130	1156	2447	2.39935	2	0	1	0	3	0	2	1	3	22.0319	13.8664	12.6384	1.06252	0.211209	0.948685	0.740803
NM_001080755	Zzz3	446	3179	7607	8.23536	8	2	7	0	15	0	6	7	15	24.8131	36.4394	23.723	0.46897	0.843313	0.908775	0.740353
NM_024266	Rps25	41	419	684	112.834	2	0	4	0	7	0	2	4	7	59.8009	150.55	80.043	0.114255	1.27312	0.650381	0.679252
NM_001164639	Slk	175	3784	6937	30.7643	11	0	18	1	48	1	11	17	47	34.4489	67.0154	56.2896	0.124741	0.908205	1.14186	0.724934
NM_019413	Robo1	991	5830	7568	10.0461	20	0	9	2	34	3	20	7	31	46.7137	20.5805	27.69	1.25842	-0.103677	0.979021	0.711255
NM_027427	Taf15	92	1766	2049	3.21248	3	1	2	0	9	0	2	2	9	13.5034	16.9976	23.2383	0.175197	0.324661	1.60294	0.700934
NM_080428	Fbxw7	162	2052	3709	126.985	16	1	16	2	45	0	15	14	45	89.7014	105.385	102.912	0.625922	0.685564	0.922092	0.744526
NM_001033375	A230046K03Rik	101	3623	5858	10.4867	8	0	9	3	38	2	8	6	36	25.6726	24.2368	44.1805	0.368172	0.105724	1.62005	0.697982
NM_001304575	Vezt	94	2449	11120	6.44444	4	1	5	0	18	1	3	5	17	14.3979	30.2059	31.2015	-0.164147	0.724122	1.49268	0.684219
NM_007657	Cd9	116	797	1192	2.76535	0	3	1	0	5	0	-3	1	5	1	20.8913	31.7351	-3.48708	0.714816	2.16778	-0.201495
NM_146054	Fermt2	142	2185	3243	6.11302	5	1	5	2	14	0	4	3	14	22.129	20.8913	29.6195	0.488681	0.224808	1.45822	0.723902
NM_001081009	Parp8	46	2722	3088	7.78235	7	1	5	0	18	0	6	5	18	25.3416	26.5825	29.0739	0.534476	0.423244	1.24573	0.734482
NM_008421	Kcnc1	1210	2746	7788	9.50042	4	1	5	1	11	0	3	4	11	22.0749	37.0494	30.9541	0.211629	0.778995	1.18273	0.724452
NM_007840	Ddx5	178	2026	3520	264.731	23	0	18	1	63	1	23	17	62	140.668	130.876	145.013	0.819267	0.544286	0.851898	0.738484
NM_010731	Zbtb7a	441	2151	5373	19.4104	6	0	7	1	14	0	6	6	14	39.6574	49.9192	35.3875	0.613581	0.767797	0.826397	0.735925
NM_030692	Sacm1l	8	1772	3433	40.6265	15	0	6	1	18	0	15	5	18	96.1086	40.3259	44.1054	1.43245	0.00365274	0.576106	0.670736
NM_001198866	Dctn1	89	3884	4190	97.3988	34	5	27	9	102	3	29	18	99	86.3686	67.4797	112.756	0.73585	0.206271	1.25787	0.733329
NM_172614	Tmem44	79	1381	4241	8.00051	4	0	3	1	8	0	4	2	8	34.7231	21.854	26.5581	0.971712	0.123586	1.09389	0.729729
NM_177586	Eif5a2	139	601	4992	14.2049	2	0	2	0	1	0	2	2	1	48.928	61.5886	9.35568	1.11034	1.26373	-0.852825	0.507081
NM_001302342	Dvl1	320	2408	3345	19.5403	4	0	8	0	25	0	4	8	25	21.6521	54.5095	51.752	-0.263647	0.890587	1.36964	0.665527
NM_172707	Ppp1cb	386	1370	4024	108.933	9	2	7	1	28	3	7	6	25	80.4031	86.7499	109.815	0.563165	0.499545	1.13367	0.732126
NM_001146318	Cnp	402	1605	2548	53.7182	8	2	5	2	34	1	6	3	33	56.3709	35.4787	118.568	0.489448	-0.353648	1.78798	0.641259
NM_001163564	Naf1	150	1944	2990	2.89376	4	0	2	1	8	0	4	1	8	25.2004	7.93031	19.2746	1.14014	-0.710676	1.41349	0.614316
NM_133347	Dhx30	176	3830	3904	49.8627	15	2	19	1	72	0	13	18	72	40.211	70.0836	85.169	0.0482885	0.674482	1.36794	0.696905
NM_173053	Limk2	371	2225	4668	16.1563	6	0	4	0	21	1	6	4	20	36.5773	30.6947	46.627	0.610769	0.179537	1.36544	0.71858
NM_001290741	Cnot6	2	1676	5372	6.53346	3	0	3	0	12	1	3	3	11	20.2551	25.4964	28.4024	0.31977	0.471109	1.34653	0.71247
NM_001164498	Papd5	108	2151	4598	10.3108	3	0	6	0	17	0	3	6	17	16.5967	41.7826	35.9665	-0.250663	0.901882	1.3363	0.662507
NM_033523	Spred2	489	1722	2872	12.4095	3	1	5	1	11	0	2	4	11	18.3331	46.154	38.5609	-0.222042	0.930993	1.29431	0.667755
NM_026375	Ahctf1	670	7402	8831	13.093	24	3	18	3	57	1	21	15	56	35.257	31.7	35.9552	0.688151	0.3559	1.15214	0.732064
NM_001081235	Mn1	0	3894	6128	14.1131	10	1	13	0	32	1	9	13	31	26.1226	47.4963	34.4099	0.209	0.892889	1.03107	0.710987
NM_146087	Csnk1a1	169	1147	2013	149.151	11	3	9	1	26	1	8	8	25	92.4529	116.376	110.489	0.569701	0.729304	0.900847	0.733284
NM_020012	Rnf14	345	1803	3040	176.441	10	1	21	2	37	4	9	19	33	69.7677	185.4	97.8304	0.0593023	1.29735	0.596083	0.650912
NM_001001986	Nol4l	156	1464	5615	7.82072	2	0	5	0	5	0	2	5	5	17.2819	54.3845	16.5226	-0.0208215	1.45292	0.426664	0.619588
NM_172591	Fcho2	341	2771	5119	3.54933	2	1	5	1	17	0	1	4	17	4.65118	23.4189	30.2385	-1.42432	0.725408	1.90614	0.40241
NM_001038999	Atp8a1	221	3716	8176	54.2515	22	3	23	2	44	1	19	21	43	61.4435	85.484	53.1788	0.607629	0.90895	0.623597	0.713392
NM_181577	Ccdc85a	782	2285	5460	14.9694	5	1	3	0	18	0	4	3	18	30.0795	28.3972	51.7644	0.375938	0.11443	1.57491	0.688425
NM_134082	Farp1	375	3522	4857	7.43497	12	3	3	3	42	2	9	0	40	32.3233	1	54.939	0.913868	-4.28096	2.19895	-0.38938
NM_026252	Cpeb4	1348	3538	7641	25.5678	7	2	12	1	24	0	5	11	24	25.8045	71.4597	47.3679	-0.177315	1.11513	1.03518	0.657667
NM_175489	Osbpl8	459	3129	7152	29.7092	20	2	7	1	30	1	18	6	29	76.1958	31.9707	46.9466	1.29164	-0.137978	0.906848	0.686838
NM_025944	Tmem246	322	1534	2983	19.7767	6	1	3	0	12	0	5	3	12	46.6269	35.2153	42.7953	0.835553	0.252853	1.08623	0.724879
NM_001177697	Ablim2	171	2025	3585	14.1152	5	0	5	0	16	0	5	5	16	30.481	38.3683	37.3016	0.43152	0.584894	1.14737	0.721261
NM_053014	Agpat3	184	1315	3439	23.275	5	0	4	0	9	0	5	4	9	49.9663	50.3165	34.3952	0.834304	0.667072	0.645733	0.715703
NM_001009947	Dock11	99	6321	6665	2.47144	10	0	6	4	36	0	10	2	36	18.1652	4.57312	25.0086	0.765732	-1.40742	1.91053	0.422947
NM_194348	Atg2a	128	5873	6340	7.10072	17	1	10	4	43	0	16	6	43	31.4775	14.8585	32.3516	0.904149	-0.359329	1.47033	0.671716
NM_001081656	Neurl1b	0	1641	6195	12.976	4	0	5	1	15	0	4	4	15	27.55	34.6788	39.5094	0.337863	0.491015	1.29504	0.707973
NM_018860	Rpl41	94	172	449	127.431	2	0	1	1	2	0	2	0	2	289.804	1	110.829	2.31562	-6.03613	1.02631	-0.898064
NM_010078	Drp2	236	3110	6983	15.1107	12	2	10	1	18	0	10	9	18	39.3263	44.5521	27.0709	0.756822	0.758373	0.632466	0.715887
NM_001270988	Asxl2	299	4556	9036	3.07061	11	2	4	1	19	0	9	3	19	23.8951	10.0261	19.2916	1.0266	-0.409014	1.36914	0.662244
NM_010602	Kcnj11	340	1513	3115	12.2044	4	0	3	1	10	0	4	2	10	38.5418	24.2574	36.8485	0.860265	0.0132551	1.24159	0.705038
NM_019565	Zfp386	134	1910	4575	4.09941	4	0	3	0	5	0	4	3	5	25.4558	24.0321	12.1687	0.938621	0.673692	0.482129	0.698147
NM_145128	Mgat5	634	2857	3104	18.0528	13	0	5	0	13	0	13	5	13	66.0957	31.9995	25.2768	1.39553	0.171041	0.39673	0.654433
NM_027121	Vkorc1l1	63	594	4919	11.2934	1	0	1	0	6	0	1	1	6	21.2851	26.7928	48.8398	0.0518099	0.204595	1.70771	0.654704
NM_178113	Ncapd3	472	4993	5503	4.98785	9	2	10	1	22	1	7	9	21	17.4998	28.3218	20.0772	0.276275	0.789471	1.05366	0.706467
NM_178633	Klhl2	266	2048	3319	110.23	9	1	18	0	38	2	8	18	36	50.7402	143.707	87.3197	-0.108299	1.22043	0.793869	0.635333
NM_172947	Lsm12	50	638	1224	10.8008	1	0	1	0	7	0	1	1	7	19.2217	24.1955	51.4562	-0.0676264	0.0850411	1.81729	0.611569
NM_027554	Usp38	470	3599	4685	9.73379	6	0	7	2	33	0	6	5	33	21.6728	22.7341	45.5854	0.170051	0.0594089	1.72251	0.650656
NM_029751	Rpl18a	67	598	1291	30.5995	5	2	3	2	10	2	3	1	8	63.8552	26.7928	65.1198	1.01842	-0.411125	1.35621	0.654503
NM_001038627	Smurf1	275	2471	5333	9.03485	5	0	6	1	15	1	5	5	14	25.734	32.3929	27.5558	0.464065	0.616261	1.0536	0.711307
NM_178246	Smg5	164	3218	4447	20.3313	9	1	12	0	31	2	8	12	29	29.6067	55.9017	41.0437	0.163157	0.902458	1.00467	0.690095
NM_183256	Cox14	239	413	723	36.8718	1	0	1	0	1	0	1	1	1	64.9562	81.7642	24.8409	0.927407	1.08332	-0.177554	0.611057
NM_173742	Rnasek	119	416	622	21.1088	2	0	1	0	1	0	2	1	1	76.1103	47.9023	14.5533	1.50204	0.65648	-0.520003	0.546173
NM_028493	Rhobtb3	292	2128	4937	3.65964	5	0	0	2	12	0	5	-2	12	30.7799	1	28.2505	1.28301	-3.8431	1.7845	-0.25853
NM_183028	Pcmtd1	412	1486	5232	34.8189	4	0	5	0	13	0	4	5	13	42.0945	66.2336	52.3186	0.337111	0.814799	0.941107	0.697672
NM_031396	Cnnm1	9	2865	5040	18.3956	12	0	10	2	22	1	12	8	21	47.489	39.8515	31.7818	0.906893	0.476004	0.712653	0.698517
NM_013908	Fbxw5	132	1854	2359	23.4919	5	1	11	0	11	0	4	11	11	26.2541	90.8808	27.6107	-0.0998641	1.51429	0.32162	0.578681
NM_021415	Cacna1h	332	7412	8228	14.8032	25	0	15	2	70	1	25	13	69	39.9095	26.123	42.1243	0.790817	0.000901042	1.28619	0.692636
NM_153049	Mkl1	229	3124	4128	17.294	7	0	10	0	27	0	7	10	27	27.3287	49.1433	40.3118	0.148025	0.816509	1.10314	0.689226
NM_029784	Fam81a	331	1426	2883	32.9834	5	0	4	0	14	1	5	4	13	51.609	51.9707	51.3153	0.664698	0.498387	0.954816	0.705967
NM_010763	Man1a2	611	2537	7944	19.3797	7	0	6	0	16	0	7	6	16	41.0782	44.3208	35.9072	0.665344	0.597163	0.848648	0.703718
NM_010282	Ggps1	219	1122	2371	17.2057	5	0	3	0	3	0	5	3	3	62.5823	47.2657	14.3599	1.34654	0.763473	-0.382078	0.575979
NM_011916	Xrn1	109	5281	10278	3.56364	13	4	4	2	40	3	9	2	37	19.6677	5.50154	30.9215	0.653344	-1.36684	1.93527	0.407258
NM_178892	Tiparp	227	2201	4154	5.14496	4	0	2	0	13	0	4	2	13	22.9025	14.4144	28.4652	0.645201	-0.204091	1.53345	0.658186
NM_030235	Avl9	217	2167	6691	17.2639	9	0	3	1	25	1	9	2	24	52.1648	14.5918	53.1978	1.08177	-0.934252	1.50465	0.550722
NM_001167910	Mbtps1	439	3598	4226	15.2494	7	4	14	0	33	2	3	14	31	10.7335	63.0509	42.416	-1.12222	1.25375	1.27331	0.468281
NM_008667	Nab1	258	1719	5088	4.04352	1	0	6	1	5	1	1	5	4	7.73605	48.6892	11.8339	-0.771187	1.70081	0.452433	0.460687
NM_080437	Celsr3	0	9906	11547	4.49749	19	2	18	0	40	1	17	18	39	19.3964	25.8516	17.017	0.488919	0.721735	0.894661	0.701772
NM_172493	Diaph2	234	3543	8442	4.0954	8	2	4	0	16	0	6	4	16	20.4939	17.1979	20.8997	0.626426	0.19157	1.26319	0.693728
NM_001081392	Mdn1	132	16881	17959	3.70896	28	3	27	4	78	3	25	23	75	16.8702	19.5367	19.3548	0.407199	0.436749	1.22862	0.690856
NM_013771	Yme1l1	194	2342	4571	56.1174	15	2	10	2	39	0	13	8	39	68.4036	52.9869	78.478	0.741462	0.198042	1.15903	0.699511
NM_138305	Adcy3	173	3611	4348	16.9064	12	0	10	0	27	1	12	10	26	39.4498	41.3816	32.6877	0.69169	0.582506	0.818122	0.697439
NM_145942	Hmgcs1	232	1795	3577	97.8728	15	3	15	5	28	0	12	10	28	86.7745	91.0235	77.4313	0.739602	0.635058	0.711912	0.695524
NM_001007574	A830010M20Rik	72	3339	6756	58.1945	31	0	14	2	38	2	31	12	36	107.246	52.257	47.6289	1.3677	0.155581	0.410628	0.644636
NM_016738	Rpl13	102	738	780	131.899	6	2	5	0	17	0	4	5	17	71.0841	111.847	115.534	0.266765	0.747971	1.05979	0.691509
NM_030719	Gatsl2	291	1281	4769	10.7021	4	0	1	0	8	0	4	1	8	45.6662	14.3707	34.9279	1.18646	-0.660898	1.26539	0.596983
NM_199068	Foxk1	27	2187	7446	10.2858	6	0	5	1	16	0	6	4	16	31.3955	26.3463	32.0172	0.670502	0.238078	1.17037	0.692982
NM_080287	Elmo2	97	2260	4590	53.4959	13	3	12	2	39	1	10	10	38	52.2532	65.7743	75.9354	0.382589	0.539483	1.1483	0.690126
NM_013807	Plk3	99	2046	2378	1.78172	3	0	2	0	4	0	3	2	4	17.4151	14.6143	8.87997	0.907885	0.47083	0.668372	0.682362
NM_175522	Elfn1	352	2839	3835	3.05165	6	2	4	1	9	0	4	3	9	18.1783	17.1616	15.6417	0.635952	0.370243	1.07133	0.692509
NM_175189	Hepacam	71	1328	3089	1.61529	1	0	1	0	5	0	1	1	5	8.99155	11.3182	17.193	0.015027	0.162675	1.69698	0.624895
NM_027230	Zmynd8	217	3985	5423	21.6065	12	1	14	1	40	1	11	13	39	32.9952	49.0846	44.7374	0.281753	0.67726	1.08221	0.680409
NM_026893	Dcaf12	336	1698	3454	10.628	2	0	3	0	14	0	2	3	14	16.5967	31.337	44.4292	-0.269461	0.468126	1.61785	0.605507
NM_009211	Smarcc1	93	3408	5673	13.3214	12	2	8	1	28	0	10	7	28	34.0946	30.0419	36.5083	0.629058	0.267707	1.16087	0.685878
NM_001160261	Fam78b	149	935	4666	2.32295	0	0	1	0	5	0	0	1	5	1	18.1005	27.4957	-3.37893	0.615628	2.09497	-0.22278
NM_011994	Abcd2	199	2425	5540	7.26959	4	0	4	1	19	0	4	3	19	20.3097	19.1738	36.8932	0.257422	-0.00599426	1.64177	0.631066
NM_172624	Dpp9	233	2822	3509	21.2884	13	2	6	1	32	1	11	5	31	48.0209	27.4758	51.7544	0.832358	-0.150685	1.30382	0.66183
NM_021346	Zfp318	73	3538	3921	7.49729	10	0	6	1	21	1	10	5	20	32.6187	20.5295	24.9485	0.921815	0.0735182	1.05365	0.682995
NM_172772	Fam63b	128	1934	8081	6.76137	1	0	7	0	9	0	1	7	9	6.25823	55.1433	21.5398	-1.39596	1.56282	0.921156	0.362672
NM_176940	Nwd1	301	4867	7722	4.45317	8	2	8	4	37	1	6	4	36	14.852	12.4634	34.0788	0.109936	-0.3247	1.90417	0.563136
NM_011674	Ugt8a	100	1726	3599	10.6214	4	0	2	1	22	0	4	1	22	27.8041	8.74968	58.4816	0.475328	-1.37205	2.01481	0.372698
NM_001083121	Enah	446	2072	11548	21.7485	7	2	7	1	16	1	5	6	15	34.7551	52.4981	39.8738	0.352658	0.770209	0.911137	0.678001
NM_001001980	Limch1	70	3244	6142	6.17513	11	1	7	2	13	2	10	5	11	35.6092	22.4117	14.9797	1.16873	0.319916	0.466905	0.651849
NM_133247	Usp33	213	2943	4194	68.3642	23	1	15	1	34	1	22	14	33	91.0814	72.9589	52.2479	1.03209	0.537551	0.420307	0.663315
NM_152825	Usp45	58	2500	6007	23.3817	12	1	10	0	15	1	11	10	14	50.9116	58.2595	24.7799	0.858507	0.875711	0.169182	0.634466
NM_177740	Rgma	355	1720	3586	3.31446	1	0	3	0	5	0	1	3	5	8.28013	31.2681	15.8327	-0.549793	1.18472	1.02531	0.553412
NM_001278075	Farsb	55	1825	2091	29.8145	6	0	9	1	18	0	6	8	18	38.3131	64.3027	43.9558	0.297576	0.867964	0.809161	0.658234
NM_175331	Nt5dc3	105	1746	5952	56.6913	8	0	9	2	31	0	8	7	31	55.0999	60.6879	81.6527	0.423129	0.387531	1.20842	0.673026
NM_022655	Ireb2	123	3015	5808	22.664	12	1	11	2	28	1	11	9	27	42.9897	44.2748	40.3537	0.633841	0.49896	0.896683	0.676494
NM_011035	Pak1	227	1862	3061	155.63	17	0	13	1	35	1	17	12	34	117.517	104.418	89.8832	0.889401	0.546615	0.570369	0.668795
NM_207523	Rpl23a	41	512	560	71.1399	4	1	4	1	8	2	3	3	6	71.9896	90.6177	55.0615	0.668028	0.825675	0.46537	0.653025
NM_019430	Cacng3	30	978	1525	15.108	4	0	3	0	5	1	4	3	4	47.6893	45.0221	18.2377	1.03511	0.773622	0.0627793	0.623836
NM_178398	Wipi2	175	1513	3913	46.8553	10	0	4	0	17	0	10	4	17	84.4721	42.5321	54.9174	1.15777	-0.007616	0.782722	0.644291
NM_013812	Cdk2ap1	257	602	1250	12.7023	1	0	1	0	2	0	1	1	2	32.7605	41.2376	25.057	0.600993	0.754089	0.65445	0.669844
NM_011958	Orc4	168	1470	4029	12.2544	4	1	5	0	6	0	3	5	6	26.0423	54.6351	19.9185	0.292164	1.18213	0.350957	0.608417
NM_008241	Foxg1	565	2011	2947	22.1044	6	1	6	3	20	0	5	3	20	39.0815	29.5166	59.7832	0.511846	-0.0705601	1.48295	0.641412
NM_001290729	Taf1	87	5769	8033	21.082	26	3	16	4	67	3	23	12	64	45.7505	30.0464	48.6851	0.768529	-0.0156367	1.22311	0.658667
NM_001242372	Gon4l	92	6872	7584	15.3186	24	2	21	0	42	0	22	21	42	36.6744	44.0659	26.7755	0.647626	0.734102	0.606128	0.662619
NM_001115150	Uspl1	742	3415	3588	10.3829	10	2	10	2	11	1	8	8	10	33.8268	42.5798	16.1703	0.772284	0.924847	0.177643	0.624925
NM_023912	Scyl1	71	2492	2637	17.4961	11	2	5	2	33	1	9	3	32	42.0163	17.6295	57.1311	0.761347	-0.669674	1.59728	0.562984
NM_144939	Frs3	232	1711	2135	4.13316	1	0	3	0	9	1	1	3	8	7.6419	28.858	23.3797	-0.802456	0.932637	1.4179	0.516029
NM_178681	Dgkb	436	2824	5544	49.459	16	0	7	1	43	1	16	6	42	75.7278	35.7462	76.0208	0.966566	-0.291785	1.21026	0.628348
NM_027375	Gcc2	40	5083	6511	21.3339	29	3	12	2	49	2	26	10	47	58.2712	28.2113	40.2834	1.11015	-0.113893	0.940679	0.645646
NM_001290353	Zfp37	206	1868	3495	6.34812	4	0	3	0	7	0	4	3	7	27.2019	25.6805	18.2047	0.763039	0.499265	0.726963	0.663089
NM_025691	Srp72	23	2039	3605	28.4157	13	1	6	0	18	2	12	6	16	67.276	42.3422	34.3042	1.13964	0.294864	0.488445	0.640984
NM_172674	Phf20	183	3216	5733	30.9091	16	1	18	2	17	1	15	16	16	55.897	75.0516	22.8016	0.820142	1.0687	-0.165487	0.574451
NM_021521	Med12	170	6743	8447	1.88927	8	1	11	1	14	1	7	10	13	12.0366	21.6446	8.54864	0.33862	1.00126	0.568442	0.636106
NM_178778	Scai	88	1909	10705	13.418	4	2	6	0	19	0	2	6	19	12.4134	46.8764	45.0984	-0.833072	0.905131	1.46016	0.510741
NM_026165	Slc25a46	91	1348	4371	29.0555	7	0	4	1	14	0	7	3	14	62.9408	33.9546	48.1404	1.02973	-0.0373802	0.960186	0.650845
NM_175457	Mroh1	218	5141	5269	9.88587	14	0	5	1	53	1	14	4	52	32.1416	11.5596	45.6553	0.72899	-0.925932	1.7128	0.505285
NM_001163623	Prepl	210	2127	3294	173.269	24	2	15	4	53	1	22	11	52	129.709	81.6363	117.246	0.965202	0.1252	0.871218	0.653873
NM_001164659	Trank1	103	9103	10520	11.3638	39	6	17	2	60	1	33	15	59	41.442	23.7116	28.3352	1.00921	0.0245081	0.91747	0.650396
NM_010250	Gabra1	780	2148	4688	170.945	13	2	15	1	31	3	11	14	28	90.8816	145.598	88.4686	0.460364	0.96825	0.475303	0.634639
NM_181318	Rasgef1b	220	1639	2993	9.45005	3	1	4	0	10	0	2	4	10	15.9301	40.1042	30.4604	-0.255733	0.896582	1.16362	0.60149
NM_030057	Trappc6b	236	713	1266	19.7543	2	0	2	0	2	0	2	2	2	47.3894	59.6519	18.123	0.859658	1.01392	-0.15253	0.573683
NM_010795	Mgat3	119	1736	4665	42.0089	7	0	9	0	16	0	7	9	16	48.928	79.1854	42.7688	0.437686	0.956511	0.50598	0.633392
NM_080708	Bmp2k	239	3656	6568	1.7119	5	0	1	1	16	0	5	0	16	16.5384	1	20.2392	0.858173	-3.37378	1.88764	-0.209324
NM_019864	Atr	128	8054	8074	1.36763	6	2	10	1	24	0	4	9	24	5.70395	16.1548	13.088	-0.53833	0.778804	1.4314	0.557292
NM_001285991	Tbc1d5	350	2864	5682	6.49292	3	1	8	1	16	1	2	7	15	8.99155	39.6137	25.7895	-0.848016	1.11066	1.21209	0.491579
NM_028356	Zbtb25	128	1448	1675	3.81109	5	0	1	0	3	0	5	1	3	42.812	10.778	9.82346	1.73388	-0.438129	0.229338	0.508364
NM_019742	Tusc2	132	465	1661	21.9956	0	0	3	0	3	0	0	3	3	1	128.171	38.9399	-4.77351	2.05096	0.868252	-0.618097
NM_028379	Zdhhc4	261	1293	1346	3.08178	1	0	1	0	6	0	1	1	6	10.9519	13.7858	25.1298	-0.10118	0.0481746	1.74778	0.564924
NM_001162943	Dchs1	306	10182	10651	1.88449	9	1	15	6	41	2	8	9	39	9.15543	12.965	17.0687	-0.0545391	0.263441	1.56798	0.592293
NM_183034	Plekhm1	113	3338	5128	3.59184	4	0	5	1	16	0	4	4	16	14.0184	17.6459	21.4441	0.159952	0.309712	1.40118	0.623615
NM_172684	Rsbn1	331	2719	6727	7.23695	7	0	4	2	17	0	7	2	17	33.1309	11.9154	30.7703	0.966219	-0.689526	1.38342	0.55337
NM_019679	Fmnl1	175	3448	3873	16.1165	9	0	9	2	36	1	9	7	35	31.0789	30.4274	46.221	0.377289	0.168444	1.35471	0.633482
NM_178782	Bcorl1	250	5596	6125	3.23079	5	0	8	0	26	2	5	8	24	10.5709	21.2899	19.4044	-0.181561	0.64599	1.33845	0.60096
NM_001164804	Coro2a	113	1688	3887	7.7554	5	1	2	0	11	0	4	2	11	28.7044	18.066	30.1877	0.716393	-0.131815	1.30263	0.629069
NM_001081567	Mapk10	566	1961	6599	67.359	9	2	8	2	30	0	7	6	30	56.7144	61.1913	92.9532	0.357834	0.292944	1.26283	0.637869
NM_027706	Nbas	24	7095	7240	10.1546	19	3	17	3	56	3	16	14	53	25.5746	28.1682	32.3976	0.382617	0.342476	1.19727	0.640788
NM_175752	Chn1	492	1497	3862	565.179	12	4	18	2	66	2	8	16	64	89.9691	226.499	275.252	-0.296023	0.867098	1.19323	0.588101
NM_153569	Gak	132	4050	4798	48.4742	19	1	21	5	64	1	18	16	63	51.9251	58.0989	69.5014	0.434653	0.421362	1.09638	0.650797
NM_001033606	Acsl3	319	2482	3810	54.7422	6	1	16	1	37	0	5	15	37	26.1266	98.6614	73.9371	-0.631697	1.11022	1.09212	0.523548
NM_022029	Nrgn	194	431	1293	349.274	2	0	3	0	10	0	2	3	10	95.3787	180.088	182.377	0.0867832	0.833596	0.969509	0.629963
NM_177164	Vwc2l	804	1473	4655	9.16615	1	0	2	0	4	0	1	2	4	16.8944	42.5321	25.8435	-0.152013	1.00022	0.949946	0.599384
NM_025500	Mrpl37	71	1343	1496	13.8358	4	0	3	0	9	0	4	3	9	35.5421	33.5542	30.5825	0.665536	0.40382	0.876211	0.648523
NM_178634	Csrnp3	193	1987	10510	18.7072	8	0	5	1	14	0	8	4	14	50.4008	31.7212	33.7305	0.982326	0.136445	0.78559	0.634787
NM_178851	Vps39	146	2774	4347	29.8043	10	0	11	0	25	0	10	11	25	43.0075	59.5498	41.118	0.464539	0.757392	0.71314	0.645024
NM_052835	Rpl10	82	727	795	109.434	4	0	5	0	12	0	4	5	12	70.0922	110.287	80.4153	0.36232	0.843033	0.680602	0.628652
NM_023220	Sppl2a	223	1795	5616	6.60508	4	0	4	0	4	0	4	4	4	28.7592	36.201	10.9983	0.818742	0.970111	-0.0305871	0.586089
NM_001081061	Bdp1	232	7636	9921	8.99786	15	0	18	3	51	0	15	15	51	22.8978	28.8229	29.7729	0.298146	0.450331	1.16839	0.638957
NM_021554	Mettl9	366	1323	1823	10.8721	2	1	1	0	16	0	1	1	16	11.8102	14.8662	72.2646	-0.774411	-0.621726	2.30217	0.302012
NM_145138	Nek9	141	3096	5386	7.80944	6	1	6	1	24	1	5	5	23	19.1241	24.0727	33.6425	0.126207	0.278018	1.45361	0.619279
NM_011520	Sdc3	134	1463	4972	25.4418	8	0	4	1	12	1	8	3	11	68.0353	32.1151	35.7754	1.22441	-0.0356942	0.634043	0.607587
NM_011828	Hs2st1	359	1430	4811	13.4517	3	0	2	0	10	0	3	2	10	31.6593	26.5677	40.3578	0.516107	0.0843921	1.29801	0.632836
NM_001252253	Nf2	138	1779	1846	23.9425	8	0	4	1	20	1	8	3	19	55.0999	26.0091	50.0452	0.957857	-0.30241	1.16501	0.60682
NM_024465	Abhd12	184	1381	1967	107.262	9	1	10	0	18	0	8	10	18	75.538	118.855	64.9974	0.482706	0.963365	0.38893	0.611667
NM_133215	Mtmr4	76	3649	5692	30.6508	20	3	11	2	46	0	17	9	46	53.7756	35.8362	55.6471	0.769528	0.00741333	1.12814	0.635026
NM_008133	Glud1	171	1848	3158	52.3342	12	0	7	2	25	0	12	5	25	80.8757	42.4179	64.4354	1.02639	-0.0798036	0.928268	0.624953
NM_008136	Gnl1	220	2044	2744	48.5361	13	0	6	0	22	0	13	6	22	80.5542	46.7993	52.1333	1.06739	0.108548	0.68056	0.618832
NM_175445	Rassf2	270	1251	4785	2.57059	1	0	2	0	3	1	1	2	2	11.5213	29.0051	8.81208	0.0844542	1.23333	0.375413	0.564399
NM_010154	Erbb4	303	4182	12037	1.42674	3	0	2	2	22	0	3	0	22	8.7412	1	24.5143	0.0512923	-3.26122	2.30424	-0.301896
NM_138748	Ptpa	252	1224	2577	41.6157	6	0	5	3	16	0	6	2	16	69.7677	29.2736	71.1494	0.955419	-0.473313	1.2475	0.576537
NM_001198969	Itsn2	257	2216	2350	20.7321	7	0	8	2	16	0	7	6	16	40.3862	43.5742	35.3023	0.598986	0.530984	0.772262	0.634078
NM_001163379	Agpat1	320	1178	2190	25.9357	3	0	4	0	7	1	3	4	6	39.5188	66.3262	30.226	0.428739	0.998758	0.37608	0.601193
NM_016893	Fut8	515	2243	2923	24.3545	5	1	7	0	19	0	4	7	19	26.1629	57.6324	47.5256	-0.127253	0.834917	1.07737	0.59501
NM_001008550	Zfyve26	159	7749	9368	2.61362	7	0	10	2	35	0	7	8	35	10.4238	14.9955	19.9317	-0.0702631	0.271301	1.54016	0.580398
NM_013647	Rps16	115	556	615	25.1261	4	0	0	0	6	0	4	0	6	102.516	1	58.8071	1.82365	-5.03316	1.36067	-0.616281
NM_001285458	Fmn1	217	4216	11523	2.70687	8	1	4	0	12	0	7	4	12	19.7841	14.2305	12.9702	0.83245	0.174107	0.893337	0.633298
NM_026236	Wdr48	15	2046	3821	20.8718	8	1	6	0	18	0	7	6	18	38.9545	42.0295	38.3072	0.542745	0.47476	0.884947	0.634151
NM_001289654	Fhod3	986	5270	5784	5.69665	8	0	9	1	19	1	8	8	18	21.1062	26.5677	18.161	0.464174	0.615152	0.806765	0.628697
NM_028420	Camk2n2	84	324	1282	4.95462	0	0	0	1	5	0	0	-1	5	1	1	90.0484	-3.84885	-4.03024	3.22394	-1.55171
NM_025630	Aggf1	299	2435	3254	17.4456	9	0	2	1	30	0	9	1	30	47.6224	6.66057	60.7068	0.943834	-2.07216	1.68709	0.186255
NM_028072	Sulf2	273	2901	3790	36.1009	12	1	10	2	40	1	11	8	39	47.3083	43.3089	64.1441	0.48314	0.179564	1.20729	0.623332
NM_011714	Baz1b	327	4767	6433	24.832	16	1	16	2	48	1	15	14	47	38.1837	44.8598	45.7543	0.406135	0.461466	1.00764	0.62508
NM_015801	Pnpla6	215	4199	4438	8.20947	7	0	10	1	24	0	7	9	24	19.8586	32.1393	26.0381	0.149583	0.664096	1.04554	0.619739
NM_177472	Slx4	308	5006	5722	5.48329	7	0	8	0	25	0	7	8	25	16.8405	24.2264	23.0009	0.162121	0.505643	1.17696	0.614909
NM_001033196	Znfx1	556	6286	7218	11.866	12	1	15	3	56	2	11	12	54	21.6974	29.7947	40.7339	0.0488109	0.327258	1.40785	0.594639
NM_010513	Igf1r	602	4712	11978	6.14224	12	1	6	3	28	1	11	3	27	30.2497	10.3847	28.3948	0.936705	-0.786588	1.39363	0.514583
NM_013630	Pkd1	313	13195	14170	6.95235	30	1	27	7	74	2	29	20	72	25.4439	22.0881	24.1583	0.610252	0.225703	1.06525	0.633735
NM_153537	Phldb1	95	4211	5461	3.37303	3	1	8	2	27	2	2	6	25	5.49192	20.739	26.2532	-1.153	0.581555	1.74143	0.389994
NM_001177982	Pde4b	104	1559	3482	25.4539	7	1	6	2	16	1	6	4	15	46.6077	39.112	44.56	0.678401	0.248371	0.950457	0.625743
NM_021399	Bcl11b	271	2710	7707	39.9378	15	0	7	0	29	0	15	7	29	69.5103	40.8318	51.393	0.975615	0.0322015	0.809871	0.605896
NM_026825	Lrrc16a	190	4315	5158	3.42583	5	0	7	0	16	2	5	7	14	13.6998	24.1427	14.6697	0.15614	0.791201	0.88983	0.612391
NM_001276358	Kcnip2	6	684	2008	23.8158	2	0	3	1	9	1	2	2	8	33.3403	41.9675	51.0009	0.236368	0.391124	1.19638	0.607959
NM_145131	Pitrm1	17	3128	3543	7.63373	11	1	3	0	19	0	10	3	19	36.3304	13.7194	26.398	1.0661	-0.519112	1.12126	0.556083
NM_133949	Ptov1	267	1518	1883	35.2683	5	1	6	0	14	0	4	6	14	36.1387	68.2349	48.3713	0.109069	0.849824	0.818073	0.592322
NM_146142	Tdrd7	146	3407	3656	15.5812	10	1	9	1	29	1	9	8	28	31.1933	34.9021	37.1129	0.403543	0.387254	1.06406	0.618287
NM_177594	Mtmr9	314	1952	2408	37.2097	9	3	9	1	19	2	6	8	17	41.4006	69.4846	44.8593	0.271934	0.842906	0.668117	0.594319
NM_015735	Ddb1	81	3504	4164	118.737	18	2	29	4	93	1	16	25	92	52.8303	103.907	116.171	-0.0961848	0.706672	1.14857	0.586351
NM_001161431	Slitrk2	280	2821	7778	7.80782	7	1	5	0	14	2	6	5	12	26.688	27.9948	20.4124	0.607131	0.495907	0.732934	0.611991
NM_139304	Gatad2b	9	1794	1912	15.7816	5	3	6	1	23	0	2	5	23	12.6637	39.8515	55.6938	-0.904919	0.570678	1.63983	0.435197
NM_001081118	Phrf1	126	5175	5374	16.0054	14	0	17	4	42	0	14	13	42	31.3395	36.6312	35.9552	0.393629	0.440421	0.997689	0.61058
NM_009558	Zfp51	111	2457	2578	1.53598	2	1	4	0	5	0	1	4	5	4.81772	24.2574	9.21212	-0.853957	1.29356	0.835484	0.425029
NM_012042	Cul1	321	2652	3157	75.498	15	3	15	0	35	0	12	15	35	58.1847	91.5507	64.8998	0.323993	0.803725	0.656817	0.594845
NM_011309	S100a1	143	428	615	3.89265	0	0	1	0	1	0	0	1	1	1	49.9192	15.1661	-3.6992	1.7603	0.839597	-0.366434
NM_001024717	Gal3st3	281	1577	2422	17.6669	4	1	5	1	12	0	3	4	12	26.1629	43.9104	40.0215	0.0718966	0.640901	1.07631	0.59637
NM_001195083	Phc2	350	1322	2549	19.8038	3	0	3	0	9	1	3	3	8	34.8839	43.9104	35.5747	0.4161	0.570369	0.818578	0.601682
NM_152816	Dnm1l	166	2305	4064	74.7275	13	0	12	1	36	2	13	11	34	68.6914	73.1635	68.7045	0.569847	0.486616	0.746898	0.60112
NM_024124	Hdac9	331	2098	4428	15.2659	7	0	3	0	14	0	7	3	14	44.7745	24.1545	34.2459	0.93767	-0.131141	0.963799	0.590109
NM_001302951	Tle4	86	2405	4067	14.7132	12	0	4	0	12	0	12	4	12	58.4858	24.5398	22.3665	1.34595	-0.0855263	0.377563	0.545996
NM_001253819	Tmem184b	152	1397	3357	7.29967	2	0	3	0	6	0	2	3	6	18.1564	34.2819	20.8305	0.0931677	0.829763	0.813937	0.578956
NM_175191	Gpr22	1332	2742	4587	44.3799	9	1	4	0	22	1	8	4	21	64.1269	40.3602	64.375	0.793894	-0.0497053	1.0537	0.599296
NM_001085440	Smcr8	503	3311	7391	12.5785	7	0	8	2	22	0	7	6	22	28.1754	30.3995	33.8644	0.389548	0.320226	1.09654	0.602104
NM_001033217	Prickle1	253	2752	4085	30.0428	13	2	4	0	42	1	11	4	41	49.7503	22.7723	70.9145	0.669713	-0.634349	1.49332	0.509562
NM_030261	Sesn3	251	1730	2158	13.5855	4	3	5	2	23	0	1	3	23	7.6419	28.858	67.2167	-1.54066	0.197577	2.02637	0.227762
NM_175174	Klhl5	166	2293	3408	13.2193	7	0	5	4	28	1	7	1	27	37.1963	6.68875	54.8673	0.759447	-1.89471	1.75451	0.206415
NM_182930	Plekha6	140	3662	7397	9.6174	7	0	8	0	22	0	7	8	22	22.4635	32.3157	26.9992	0.229212	0.574218	0.976104	0.593178
NM_008514	Lrp6	216	5058	9368	9.61415	14	2	11	6	45	0	12	5	45	28.0108	14.6912	40.1703	0.547821	-0.562853	1.54958	0.511515
NM_025808	Lztr1	57	2571	3108	90.1549	16	0	16	2	47	2	16	14	45	71.9324	79.2274	77.3686	0.519929	0.485557	0.77391	0.593132
NM_001112705	Tlk2	527	2780	5481	11.18	7	2	6	1	17	1	5	5	16	25.0829	31.5734	30.6956	0.294934	0.447693	1.04544	0.596023
NM_001165999	Lingo2	1310	3131	4642	7.49611	6	1	3	0	8	0	5	3	8	31.0334	23.4382	18.9888	0.850037	0.264774	0.659967	0.591593
NM_026273	4930453N24Rik	76	1123	1331	11.7382	3	0	1	0	11	0	3	1	11	32.385	13.5883	45.4112	0.63333	-0.798746	1.57299	0.469191
NM_008687	Nfib	1019	2282	8903	26.9151	7	2	6	4	20	0	5	2	20	44.7442	22.5289	68.4454	0.584905	-0.581943	1.52674	0.509899
NM_018818	Chm	26	2015	4867	29.7232	7	1	11	0	14	0	6	11	14	34.0946	78.6811	30.4236	0.131185	1.161	0.280654	0.524278
NM_009438	Rpl13a	31	643	1026	111.426	3	0	5	2	20	0	3	3	20	55.4038	69.7401	141.252	0.0118584	0.170691	1.47946	0.554003
NM_010633	Uhmk1	153	1413	2024	48.3899	8	0	6	3	21	0	8	3	21	71.7611	33.8738	72.0387	0.902501	-0.355907	1.14945	0.565347
NM_025586	Rpl15	38	653	1841	82.9639	4	0	4	0	8	0	4	4	8	73.5114	92.5332	56.2254	0.602822	0.760875	0.377306	0.580334
NM_019696	Cpxm1	123	2292	2421	1.8888	3	0	3	0	3	0	3	3	3	15.6326	19.6777	5.97832	0.715904	0.863965	0.0526775	0.544182
NM_010206	Fgfr1	759	3228	5025	18.8698	7	1	9	0	19	0	6	9	19	27.4663	51.8602	33.2621	0.101172	0.840276	0.75876	0.566736
NM_001163471	Hectd2	145	2473	4764	7.75431	6	2	4	0	16	0	4	4	16	19.4199	24.445	29.7067	0.15274	0.304533	1.27957	0.578946
NM_013843	Zfp53	308	2267	3079	2.02435	3	0	2	0	4	0	3	2	4	17.3084	14.5247	8.82557	0.819819	0.383101	0.561327	0.588082
NM_007760	Crat	410	2291	4393	4.88508	2	1	3	2	24	1	1	1	23	6.0087	7.56352	52.8514	-1.25302	-1.10245	2.46605	0.0368589
NM_009484	Uty	207	3846	5249	7.74118	4	1	11	1	24	0	3	10	24	9.3177	39.0958	28.5067	-0.905697	0.983057	1.22138	0.432913
NM_001081422	Bod1l	147	9246	10540	15.1699	29	2	20	3	88	3	27	17	85	33.5382	26.5808	40.3778	0.524708	0.0108485	1.20628	0.580612
NM_145958	Kbtbd2	643	2515	3868	28.8318	4	1	12	1	19	1	3	11	18	18.1128	83.5987	41.5608	-0.762462	1.26727	0.754105	0.419637
NM_001177778	Dlg3	350	2858	4943	60.9026	17	1	9	0	40	0	16	9	40	72.1044	51.0537	68.9366	0.766714	0.093876	0.909082	0.589891
NM_207667	Fgf14	410	1169	3224	15.6553	1	0	4	0	4	0	1	4	4	14.8911	74.9775	22.779	-0.66618	1.48747	0.356204	0.392497
NM_001164491	Ablim3	264	2313	4216	3.36377	3	0	2	0	9	0	3	2	9	16.5481	13.8868	18.9853	0.439991	0.0046142	1.27593	0.573513
NM_175455	Ankrd34b	543	2070	3940	3.41012	6	2	0	1	8	0	4	-1	8	29.6067	1	22.6448	1.27076	-3.79948	1.5197	-0.336338
NM_030721	Acox3	186	2289	3956	6.40398	5	2	4	1	15	0	3	3	15	16.1232	20.2953	30.8297	0.00303795	0.154325	1.48023	0.545865
NM_152813	Plcd3	128	2486	3031	3.06771	3	0	2	1	15	0	3	1	15	14.3796	6.03349	27.4957	0.294502	-1.14112	1.88111	0.34483
NM_007460	Ap3d1	220	3820	4730	58.447	22	1	15	4	69	2	21	11	67	65.9305	43.4713	80.4433	0.663104	-0.112654	1.16343	0.571294
NM_033269	Chrm3	782	2552	3168	31.8033	11	0	7	3	17	0	11	4	17	70.2407	32.1514	41.5138	1.13199	-0.171926	0.677039	0.545699
NM_001290384	Arhgef9	170	1658	4696	82.517	13	1	9	1	18	0	12	8	18	91.1482	76.4891	52.2862	0.916419	0.489495	0.276669	0.560861
NM_013511	Epb41l2	89	3056	4280	2.98785	4	0	3	1	16	1	4	2	15	15.2374	9.59014	21.852	0.394461	-0.456266	1.56995	0.502715
NM_172676	Samd10	125	734	2099	1.46029	1	0	0	0	2	0	1	0	2	18.5589	1	14.1948	1.12308	-3.27558	1.4981	-0.218134
NM_173378	Trp53bp2	257	3662	4370	3.3743	5	0	6	0	9	1	5	6	8	16.5967	25.0696	10.1552	0.442282	0.85491	0.370869	0.55602
NM_080563	Rnf144a	355	1234	5098	2.44095	0	0	2	0	3	0	0	2	3	1	32.3708	14.752	-3.40967	1.42369	1.15856	-0.275808
NM_178267	Zfp827	250	3487	7604	7.09154	9	0	5	2	20	0	9	3	20	31.4246	13.1853	26.7057	0.902526	-0.53088	1.19464	0.522094
NM_133704	Sec22a	112	1036	3992	5.16987	2	0	2	0	2	0	2	2	2	24.464	30.7943	9.35568	0.737362	0.888083	-0.0755478	0.516632
NM_198710	Sypl	105	837	4615	3.75781	1	0	2	0	1	0	1	2	1	15.4404	38.8715	5.90481	0.271313	1.42119	-0.494173	0.399444
NM_001122739	Inppl1	303	4077	4758	2.98538	2	1	6	0	20	0	1	6	20	2.9948	22.6184	22.9058	-1.95212	0.782117	1.63853	0.156177
NM_001166497	3110052M02Rik	558	1941	4367	1.55964	2	1	1	0	5	0	1	1	5	8.17236	10.287	15.6266	-0.101038	0.0465171	1.58613	0.510536
NM_178716	Tnpo1	119	2816	5391	7.68629	7	1	4	1	20	0	6	3	20	25.1443	15.8253	32.0528	0.530904	-0.317327	1.396	0.536527
NM_145981	Phyhip	307	1300	2789	203.588	7	0	9	0	30	1	7	9	29	79.6743	128.945	126.231	0.162075	0.68507	0.853738	0.566961
NM_178589	Tnfrsf21	442	2410	3626	31.7407	10	0	7	1	19	1	10	6	18	57.4308	43.3749	39.5335	0.842723	0.261273	0.608035	0.570677
NM_172563	Hlf	553	1441	5665	19.254	6	0	2	0	3	0	6	2	3	76.3674	32.0427	14.6024	1.56396	0.133197	-0.444409	0.417584
NM_175245	Mzt1	73	310	2256	22.7732	1	0	1	0	1	0	1	1	1	47.6893	60.0294	18.2377	0.780536	0.935174	-0.252793	0.487639
NM_013668	Kdm5c	334	4990	11018	12.5858	10	1	12	2	42	0	9	10	42	21.8474	30.5562	38.99	0.0222104	0.327285	1.29943	0.549642
NM_175274	Ttyh3	204	1779	4659	25.2131	10	0	2	1	19	0	10	1	19	71.7611	9.033	52.1423	1.30693	-1.86009	1.18447	0.210439
NM_001252490	Osbpl1a	496	1810	2703	94.3558	8	0	9	0	20	0	8	9	20	68.812	97.445	65.7888	0.427695	0.756013	0.504981	0.562896
NM_026813	Ppp6r2	604	3376	3491	47.8083	15	3	11	4	58	0	12	7	58	48.928	35.9267	90.4382	0.357462	-0.263548	1.48691	0.52694
NM_025949	Rps6ka6	157	2740	4683	1.67714	3	0	1	0	10	0	3	1	10	13.127	5.50793	16.7337	0.537618	-0.899597	1.62903	0.422349
NM_001177374	Ubr2	313	5581	7649	13.2967	18	1	11	2	41	1	17	9	40	36.4731	24.3058	32.8195	0.7275	-0.0368213	1.00862	0.566434
NM_175158	Utp20	164	8534	8831	4.7565	14	1	17	4	35	0	13	13	35	17.5545	22.0969	18.0742	0.310236	0.460737	0.938558	0.569844
NM_025370	Aaed1	26	707	972	1.43796	2	0	0	0	1	0	2	0	1	33.1935	1	6.34703	1.97142	-3.26606	0.348739	-0.3153
NM_175268	Fam53b	240	1509	5068	3.78795	3	0	0	0	8	0	3	0	8	26.7196	1	27.2487	1.05754	-3.86438	1.70591	-0.366978
NM_145922	Kcnc4	8	1895	3013	15.2168	5	0	3	0	21	0	5	3	21	29.948	22.6184	48.1022	0.359448	-0.223945	1.45644	0.530649
NM_178112	Ints8	149	3137	3434	11.0956	8	1	9	0	14	1	7	9	13	26.4781	42.8523	18.8053	0.37773	0.893039	0.344376	0.538382
NM_001044371	Rad17	174	2241	2721	6.79858	3	0	6	1	10	1	3	5	9	16.404	34.4146	18.82	-0.00914576	0.879265	0.722195	0.530771
NM_027533	Tspan2	227	893	4261	5.69328	1	0	0	0	8	0	1	0	8	16.9705	1	51.9198	0.149905	-4.11608	2.32266	-0.54784
NM_013823	Kl	110	3155	5118	8.10887	7	1	5	3	31	0	6	2	31	22.2707	9.34448	44.004	0.322615	-1.11044	1.81203	0.341402
NM_001077707	Shprh	195	5220	6950	19.6295	24	2	13	4	44	0	22	9	44	49.483	25.4812	37.8472	0.925958	-0.209303	0.914712	0.543789
NM_177387	Ust	426	1650	4284	17.4431	7	0	2	1	10	0	7	1	10	64.6378	11.6233	35.3131	1.38466	-1.26876	0.905543	0.340481
NM_001081652	Nacad	306	4821	4893	6.09804	9	1	8	0	20	0	8	8	20	20.0264	25.2084	19.1465	0.346166	0.497324	0.830638	0.558043
NM_172473	Hace1	246	2976	3785	16.4001	8	2	9	0	21	1	6	9	20	24.8404	46.9021	31.6654	0.0432195	0.781953	0.79566	0.540277
NM_177412	Tmcc1	300	2250	5719	13.9091	5	0	5	0	14	1	5	5	13	28.9804	36.4794	28.8155	0.36781	0.521146	0.786287	0.558414
NM_177224	Chd9	371	8981	11517	8.08151	28	2	15	3	43	2	26	12	41	34.1303	19.8285	20.5825	0.940618	-0.0229574	0.718411	0.545357
NM_175472	Zcchc11	489	5424	6054	6.66349	8	1	12	0	24	3	7	12	21	16.0317	34.5945	18.3929	-0.029814	0.899185	0.70451	0.524627
NM_011274	Uri1	332	1928	3451	9.49142	1	1	10	1	8	0	0	9	8	1	80.2273	21.6658	-4.25212	1.89422	0.668747	-0.563051
NM_008991	Abcd3	97	2077	3399	20.832	5	0	9	1	16	2	5	8	14	28.5413	57.4827	30.5619	0.0951944	0.927669	0.560537	0.5278
NM_013762	Rpl3	80	1292	1361	321.118	18	3	12	0	34	0	15	12	34	139.881	140.861	121.253	0.691384	0.531084	0.445249	0.555906
NM_008516	Lrrn1	770	2921	3756	35.0187	7	0	13	1	17	0	7	12	17	36.7813	79.3695	34.1606	0.138903	1.07228	0.321715	0.510967
NM_019579	Mpp5	407	2435	5515	12.6119	9	0	4	0	8	0	9	4	8	50.1585	28.0611	17.0506	1.21996	0.203113	0.104556	0.50921
NM_152818	Osbp2	36	2763	4097	27.849	10	1	10	1	29	0	9	9	29	37.3016	46.9537	45.9653	0.301282	0.456452	0.926098	0.561277
NM_010123	Eif3a	176	4211	5176	51.3432	25	3	19	1	45	1	22	18	44	61.6238	63.4661	47.1332	0.646037	0.513316	0.491858	0.550404
NM_029870	Crebrf	311	2234	7455	7.56273	5	0	3	2	16	0	5	1	16	29.3873	7.39832	35.9632	0.76592	-1.40428	1.57454	0.312058
NM_028198	Xpo5	66	3681	3709	15.7466	8	1	11	0	30	0	7	11	30	21.8856	43.2909	35.8699	-0.114256	0.691485	1.0068	0.52801
NM_021284	Kras	194	761	4670	18.8857	1	0	3	0	3	0	1	3	3	19.9336	75.275	22.8694	-0.361808	1.3773	0.217652	0.411047
NM_001039214	Mex3c	339	2298	4080	13.9207	3	0	6	1	19	0	3	5	19	17.3084	36.3118	41.9215	-0.376312	0.513991	1.32649	0.488058
NM_026391	Ppp2r2d	123	1485	2054	24.0179	4	2	9	1	10	0	2	8	10	16.5967	83.5652	31.7351	-0.775245	1.37953	0.505444	0.369911
NM_008418	Kcna3	261	1848	1968	2.98199	2	0	3	0	3	0	2	3	3	14.2437	26.8941	8.17075	0.298382	1.03261	0.152235	0.49441
NM_027150	Mlip	107	917	1224	5.88242	1	0	2	1	6	0	1	1	6	13.9535	17.5642	32.0172	-0.152769	-0.00170662	1.60009	0.481871
NM_001159729	Rab23	323	1037	4209	3.79489	2	0	1	0	1	0	2	1	1	31.6593	19.9257	6.05368	1.30114	0.451046	-0.465805	0.428794
NM_028763	Cbx6	122	1367	5449	107.817	10	0	7	1	24	0	10	6	24	90.7821	68.5637	83.3219	0.744712	0.166492	0.74328	0.551495
NM_008770	Cldn11	230	854	1872	21.761	1	0	3	0	5	0	1	3	5	18.1128	68.3989	34.634	-0.587917	1.15156	0.707441	0.423696
NM_024195	Cyb5r4	150	1737	2629	13.3312	5	0	4	0	9	1	5	4	8	35.6092	35.8588	21.7887	0.691312	0.522607	0.415658	0.543192
NM_011063	Pea15a	187	580	2477	67.1922	1	0	3	0	6	0	1	3	6	28.7592	108.603	65.9897	-0.620319	1.12214	0.770472	0.424097
NM_001083927	Tle3	1072	3421	5202	11.0938	8	0	3	0	16	0	8	3	16	38.4925	18.1698	29.4411	0.917613	-0.344686	0.991199	0.521375
NM_001166656	Cdkl3	215	1961	2030	2.43339	2	0	3	0	3	0	2	3	3	12.9466	24.445	7.42667	0.286752	1.02044	0.170826	0.492674
NM_009454	Ube2e3	387	1011	1539	53.0792	3	0	2	0	12	1	3	2	11	54.3383	45.5993	76.1948	0.44389	0.0158012	1.15924	0.539643
NM_028476	Atat1	33	966	1976	6.20843	1	0	2	0	5	0	1	2	5	12.114	30.4973	23.1636	-0.390186	0.761019	1.09162	0.487484
NM_001038010	Kat2a	63	2553	3045	15.4077	7	1	7	1	21	0	6	6	21	27.2346	34.2819	36.4533	0.214698	0.368304	1.04681	0.54327
NM_198031	Tubgcp3	70	2788	3649	10.5397	6	0	6	0	16	0	6	6	16	24.95	31.4061	25.4441	0.323862	0.476465	0.820102	0.540143
NM_028756	Slc35a5	312	1626	4200	9.19832	3	0	3	0	6	0	3	3	6	25.8045	32.4817	19.7366	0.456889	0.609132	0.558327	0.541449
NM_009592	Abcb7	22	2281	5759	14.8495	7	2	5	1	25	0	5	4	25	25.0163	25.1916	47.8345	0.115015	-0.0534046	1.46718	0.509598
NM_011204	Ptpn13	350	7706	8282	1.18814	9	0	5	1	16	1	9	4	15	13.8284	7.73626	8.81388	0.826542	-0.196546	0.969191	0.533062
NM_013918	Usp25	27	3195	4413	15.9566	8	2	6	0	39	0	6	6	39	21.406	26.945	53.2104	-0.154445	-0.000747083	1.56554	0.470117
NM_001024458	Add1	220	2428	3917	134.749	17	0	12	3	67	0	17	9	67	87.0201	57.9904	131.157	0.545324	-0.21288	1.22634	0.519593
NM_001159967	Ralgps2	221	1916	6914	12.841	8	2	4	1	10	0	6	3	10	40.0084	25.1805	25.5004	0.882602	0.0357269	0.671411	0.529913
NM_148945	Rps6ka3	338	2561	7320	4.80722	4	0	2	1	16	0	4	1	16	20.3372	6.3999	31.1098	0.515937	-1.33353	1.71384	0.298747
NM_001130451	Nfe2l1	406	1768	3530	57.0418	7	1	5	0	27	2	6	5	25	49.7902	52.2283	79.3378	0.273116	0.167145	1.16218	0.534148
NM_178674	Fbxl21	341	1646	1965	1.24421	1	1	2	0	3	0	0	2	3	1	21.8038	9.93638	-2.99162	1.26984	1.10668	-0.205031
NM_009746	Bcl7c	239	893	965	2.57334	1	0	1	0	1	0	1	1	1	17.2819	21.7538	6.60906	0.668753	0.817631	-0.0404478	0.481979
NM_008630	Mt2	230	416	556	3.92932	0	0	0	0	3	0	0	0	3	1	1	69.7149	-3.70501	-3.88702	3.03301	-1.51967
NM_199305	Tmem39b	120	1599	1810	1.44507	2	1	3	3	8	0	1	0	8	7.6419	1	23.3797	-0.15053	-3.26911	2.22605	-0.397863
NM_010311	Gnaz	702	1770	2435	38.0976	7	0	3	2	17	0	7	1	17	74.0792	13.3211	68.801	1.09672	-1.55464	1.26701	0.269697
NM_153399	Syne1	432	4728	6982	104.909	28	4	40	9	77	5	24	31	72	63.1417	102.662	72.4412	0.237857	0.765764	0.562416	0.522012
NM_153406	Specc1l	184	3541	6062	10.2009	7	0	8	0	18	0	7	8	18	23.5677	33.904	23.176	0.261895	0.607057	0.710525	0.526492
NM_001177536	Prdm11	172	1870	1870	1.9452	2	0	1	0	6	0	2	1	6	13.3126	8.37867	15.2732	0.465882	-0.385979	1.38324	0.487716
NM_001163452	Trpc4ap	78	2472	3198	63.958	12	1	11	3	54	2	11	8	52	51.9324	47.5421	93.8851	0.262893	-0.0391724	1.31706	0.513595
NM_028841	Tspan17	190	1003	1556	3.86273	3	0	0	0	3	0	3	0	3	41.7062	1	15.9495	1.68778	-3.87646	0.9182	-0.423493
NM_009697	Nr2f2	264	1509	4216	2.14631	1	1	3	0	3	0	0	3	3	1	34.2819	10.4152	-3.32987	1.5859	0.755273	-0.329567
NM_009624	Adcy9	766	4828	7840	48.2396	17	2	22	2	52	1	15	20	51	41.737	70.0491	54.2685	0.122556	0.694214	0.743181	0.519983
NM_145465	Stk24	291	1587	2574	16.13	3	0	4	0	9	0	3	4	9	26.1629	43.9104	30.0161	0.128355	0.69712	0.731261	0.518912
NM_025695	Smc6	408	3702	5603	13.8571	10	1	9	0	18	0	9	9	18	30.8808	38.8715	23.6193	0.461764	0.61509	0.502286	0.52638
NM_026283	Samd8	76	1513	6997	15.6783	6	1	4	0	8	1	5	4	7	39.3263	39.6019	21.0552	0.733946	0.56567	0.241539	0.513718
NM_176962	Zfp944	508	1987	2784	4.6299	6	1	2	0	3	1	5	2	2	38.2095	19.2386	5.84493	1.44907	0.277567	-0.669374	0.35242
NM_001289895	Tns1	2	5606	9905	1.83029	4	0	3	1	31	1	4	2	30	8.06736	5.07744	23.1388	-0.218966	-1.07099	2.02938	0.246474
NM_172911	D8Ertd82e	288	4410	4780	7.23886	9	0	6	2	30	1	9	4	29	24.6777	13.8059	30.4094	0.541084	-0.477231	1.36619	0.476681
NM_175272	Nav2	752	8051	11318	3.36418	11	1	10	3	31	0	10	7	31	15.4848	13.6442	18.3576	0.344102	-0.0208847	1.22733	0.51685
NM_009148	Exoc4	3	2931	3723	38.041	12	0	9	0	40	1	12	9	39	46.3212	43.7305	57.5719	0.420248	0.161204	1.01109	0.530846
NM_020332	Ank	327	1806	3498	29.5585	7	1	6	3	21	1	6	3	20	45.8514	28.858	58.4493	0.562054	-0.282619	1.22692	0.502119
NM_080450	Gjc3	62	872	3515	1.39448	1	0	0	1	3	0	1	-1	3	13.9535	1	16.0086	0.740206	-3.2471	1.70705	-0.266615
NM_201411	Flrt1	692	2717	5872	7.79777	6	0	1	0	16	1	6	1	15	33.4885	7.02567	32.0172	0.935405	-1.49775	1.38333	0.27366
NM_178714	Lrfn5	1859	4100	5191	14.8556	7	0	4	0	18	0	7	4	18	35.3042	25.394	34.7175	0.611731	-0.042114	1.00448	0.524699
NM_198091	Usp2	269	1460	3226	11.5387	5	0	2	1	8	0	5	1	8	47.4491	11.9454	29.0332	1.19502	-0.974068	0.94083	0.38726
NM_172714	Lin54	171	2421	4464	5.34409	3	0	5	1	10	0	3	4	10	15.0698	25.2924	19.2103	0.0178023	0.583649	0.936931	0.512794
NM_146239	Cdk17	354	1926	3643	143.69	12	3	16	1	30	2	9	15	28	64.7082	135.754	76.988	0.0780708	0.97454	0.408336	0.486982
NM_001200038	Rubcn	206	3077	5343	22.2488	11	2	11	3	26	0	9	8	26	35.4306	39.6433	39.1433	0.36632	0.350972	0.86697	0.528087
NM_001080754	Ambra1	361	3991	5017	20.2814	7	0	14	0	30	0	7	14	30	21.7952	54.8699	35.7217	-0.277231	0.877101	0.806203	0.468691
NM_009955	Dpysl2	232	1951	4432	338.601	22	8	22	6	80	3	14	16	77	92.0496	132.421	193.612	0.0547813	0.409195	1.07962	0.514533
NM_019649	Clptm1	25	2020	4131	38.359	8	1	7	0	28	1	7	7	27	39.6574	49.9192	58.4976	0.191002	0.347017	1.0277	0.521905
NM_011102	Prkcg	258	2352	3117	273.477	16	1	26	5	74	2	15	21	72	80.9626	142.677	148.619	0.00213553	0.648766	0.862335	0.504412
NM_145929	Gga1	385	2293	3034	11.8429	4	0	8	0	5	0	4	8	5	23.6947	59.6519	11.3268	0.17706	1.32997	-0.437141	0.35663
NM_026017	Ctdnep1	316	1051	1615	8.83368	2	1	1	0	7	0	1	1	7	15.3774	19.3564	41.165	-0.264832	-0.112696	1.64997	0.424149
[truncated: 8,885 more rows]

## Sheet: CA1Targets
Stringent Targets			High Binding Targets			Low Binding Targets
RefSeq Transcript	Gene Symbol		RefSeq Transcript	Gene Symbol		RefSeq Transcript	Gene Symbol
NM_001039000	Kif5a		NM_008615	Me1		NM_010431	Hif1a
NM_007462	Apc		NM_008963	Ptgds		NM_008679	Ncoa3
NM_001204165	Rapgef4		NM_001100452	Gltscr1l		NM_172289	Slc36a4
NM_001110796	Pclo		NM_001145959	Ndrg2		NM_008149	Gpam
NM_011049	Cdk16		NM_009920	Cnih2		NM_145542	Ahcyl1
NM_001081154	Marf1		NM_001034964	Sorbs1		NM_013889	Zfp292
NM_008634	Map1b		NM_001042488	Dlgap4		NM_001162366	Ptk2b
NM_001081153	Unc13c		NM_177821	Ep300		NM_001164366	Atp13a2
NM_178655	Ank2		NM_175535	Arhgap20		NM_029349	2310035C23Rik
NM_008960	Pten		NM_001294143	Hipk2		NM_001165956	Phc3
NM_170728	Ank3		NM_026984	Kmt2e		NM_170756	Spata2
NM_001034115	Shank1		NM_001160256	Smg7		NM_033581	Pcdhgc3
NM_021287	Sptbn2		NM_027882	Cic		NM_001114663	Plcl1
NM_133769	Cyfip2		NM_144945	Lgi2		NM_018781	Egr3
NM_175836	Sptbn1		NM_007470	Apod		NM_030174	Mctp1
NM_016965	Nckap1		NM_198438	Ssbp3		NM_172464	Daam1
NM_001294150	Kif1a		NM_011123	Plp1		NM_175180	Wdr44
NM_001025259	Mbp		NM_009628	Adnp		NM_009753	Bicd1
NM_080455	Tshz2		NM_145400	Ube4a		NM_001166648	Zfp280c
NM_021523	Huwe1		NM_001122768	Lrrc8d		NM_001122594	Phlpp2
NM_001143849	Pde2a		NM_020283	B3galt1		NM_032543	Rnf123
NM_001033263	Agap2		NM_001159516	Qk		NM_012014	Gprin1
NM_001160222	Pum2		NM_001081412	Bcr		NM_177185	Ubn2
NM_026361	Pkp4		NM_172280	Emsy		NM_001166416	Med23
NM_011767	Zfr		NM_018873	Srcin1		NM_001145919	Ythdf3
NM_007567	Bsn		NM_001276467	Asap1		NM_001082484	Snx27
NM_010437	Hivep2		NM_011630	Nr2c2		NM_183141	Elfn2
NM_007864	Dlg4		NM_008569	Anapc1		NM_023229	Fastk
NM_001173506	Map1a		NM_019409	Omg		NM_019740	Foxo3
NM_008632	Map2		NM_183019	Arhgef4		NM_145515	Mark1
NM_001039386	Nsmf		NM_181399	Usp6nl		NM_172495	Ncoa7
NM_021494	Dennd5a		NM_001289826	Clock		NM_172610	Mpped1
NM_001290760	Tbc1d9b		NM_175251	Arid2		NM_031842	Smarcd1
NM_011245	Rasgrf1		NM_026872	Ubap2		NM_001195268	Cbarp
NM_011807	Dlg2		NM_029525	Prex2		NM_001081113	Ipo8
NM_001291452	Lrrc7		NM_153178	Ago2		NM_182995	Ccp110
NM_010239	Fth1		NM_001267872	Zdbf2		NM_001195023	Nploc4
NM_001002004	2610507B11Rik		NM_198250	Lrrc4b		NM_009677	Ap1g1
NM_010897	Nf1		NM_001163542	Plec		NM_001290540	Pdzd4
NM_009622	Adcy1		NM_001077354	C77370		NM_009239	Sp4
NM_008614	Mobp		NM_001012625	Rims1		NM_023858	Mtmr2
NM_001190401	Usp34		NM_020009	Mtor		NM_001166414	Rfx3
NM_025451	Camk2n1		NM_011857	Tenm3		NM_207214	Exoc5
NM_022656	Nisch		NM_001285426	Cacnb4		NM_001293663	Camk2d
NM_009481	Usp9x		NM_177700	Atmin		NM_009297	Supt6
NM_001164225	Fbxl16		NM_153588	Mkl2		NM_199299	Jade2
NM_181421	Gm15800		NM_001031814	Smg1		NM_183187	Fam107a
NM_001168572	Brsk1		NM_019987	Ick		NM_174988	Cdh22
NM_001185020	Wnk1		NM_001081049	Kmt2a		NM_001142809	Slc6a8
NM_177407	Camk2a		NM_001081376	Chd5		NM_007889	Dvl3
NM_001128180	Dlgap1		NM_001112721	Ubr5		NM_198600	Papd7
NM_013697	Ttr		NM_001039546	Myo6		NM_011766	Zfpm2
NM_177379	Arhgap32		NM_007868	Dmd		NM_175171	Mast4
NM_001164503	Akap11		NM_001164585	Dnajc6		NM_133685	Rab31
NM_146019	Chd3		NM_001113517	Arhgef7		NM_134089	Scrib
NM_172579	Sipa1l1		NM_133907	Ube3c		NM_007488	Arnt2
NM_001199137	Macf1		NM_001160017	Gnb1		NM_001290659	Tanc1
NM_175510	Unc80		NM_008420	Kcnb1		NM_001199247	Kat5
NM_177751	Cnksr2		NM_175291	Dock10		NM_013681	Syn2
NM_145599	Tmem184c		NM_134112	Kctd1		NM_017475	Rragc
NM_011162	Mapk8ip1		NM_011074	Cdk14		NM_174991	Adgrb1
NM_001253369	Kcnma1		NM_001289685	Iqsec3		NM_001128103	Ano3
NM_010498	Ids		NM_199149	Ppp1r37		NM_009366	Tsc22d1
NM_001029889	Usf3		NM_175022	Prr12		NM_145421	Abhd17a
NM_030595	Nbea		NM_033524	Spred1		NM_201519	Map4k5
NM_133833	Dst		NM_001083967	Tcf4		NM_016782	Cntnap1
NM_001282093	Wac		NM_025757	Gid4		NM_020278	Lgi1
NM_172679	4932438A13Rik		NM_001252060	Cacna1a		NM_010601	Kcnh3
NM_172406	Trak2		NM_007379	Abca2		NM_001285519	Nr1h2
NM_054093	Ube3b		NM_177034	Apba1		NM_001290827	Cpeb3
NM_001128084	Arhgap21		NM_001081963	9430020K01Rik		NM_001081307	Ppp1r12b
NM_001033150	Plekhm2		NM_001081982	Nfix		NM_013780	Npas3
NM_001290995	Kif1b		NM_007708	Cit		NM_017478	Copg2
NM_008170	Grin2a		NM_177047	Auts2		NM_025483	Senp7
NM_201245	Mprip		NM_176832	Spire1		NM_199446	Phkb
NM_172882	Wdfy3		NM_175021	Samd4b		NM_177784	Klhl23
NM_008982	Ptprj		NM_009125	Atxn2		NM_028007	Itfg1
NM_175229	Srrm2		NM_198862	Nlgn2		NM_001081315	Brpf3
NM_194340	Prr14l		NM_001304266	Srcap		NM_001081013	Rlf
NM_013881	Ulk2		NM_001256382	Rims2		NM_001167883	Ankrd50
NM_018814	Pcnx		NM_007841	Ddx6		NM_010806	Mllt4
NM_001159634	Prrc2b		NM_146150	Nrd1		NM_173758	Vwa8
NM_009706	Arhgap5		NM_001170745	Magi2		NM_175337	Mlh3
NM_010585	Itpr1		NM_010193	Fem1b		NM_146073	Zdhhc14
NM_001159591	Csnk1g2		NM_011682	Utrn		NM_001166547	Eif4enif1
NM_001025432	Crebbp		NM_198292	Tex2		NM_145223	Alms1
NM_207215	Mycbp2		NM_009872	Cdk5r2		NM_001033304	5330417C22Rik
NM_011952	Mapk3		NM_018733	Scn1a		NM_213614	Sept5
NM_013507	Eif4g2		NM_001001152	Zfp458		NM_001099328	Zfp831
NM_001081045	Kansl1		NM_026799	Drosha		NM_010092	Dyrk1b
NM_009441	Ttc3		NM_199306	Wdtc1		NM_001081184	Focad
NM_001190376	Camta2		NM_031174	Dscam		NM_013880	Plcl2
NM_181074	Lingo1		NM_001083587	Tns3		NM_001170567	Depdc5
NM_001081109	Lmtk2		NM_198033	Setx		NM_013735	Trp53bp1
NM_010432	Hipk1		NM_023662	Pcm1		NM_011322	Scn1b
NM_001002005	Panx2		NM_001285860	Sgip1		NM_029749	Usp42
NM_010864	Myo5a		NM_001139509	Nr4a2		NM_001287165	Nup98
NM_172739	Arhgap35		NM_175749	Nup153		NM_172585	Larp4b
NM_172887	Fry		NM_177608	Secisbp2l		NM_021324	Ttyh1
NM_198111	Akap6		NM_001033268	Fam120a		NM_198170	Szt2
NM_023045	Xpo7		NM_138682	Lrrc4		NM_146155	Ahdc1
NM_001100591	Rc3h2		NM_001080925	Rapgefl1		NM_010238	Brd2
NM_175514	Fam171b		NM_001003908	Cltc		NM_001174107	Map3k9
NM_001042743	Mast2		NM_028627	Psd		NM_021536	Rhot1
NM_001040106	Aak1		NM_133195	Celf4		NM_133808	Hdlbp
NM_012005	Med14		NM_177644	Rasal2		NM_013494	Cpe
NM_010881	Ncoa1		NM_008774	Pabpc1		NM_026482	Atp2b1
NM_020027	Prrc2a		NM_001302958	Ttll7		NM_019930	Ranbp9
NM_028906	Dpp8		NM_001044741	Cacnb3		NM_152234	Ubqln1
NM_011785	Akt3		NM_177327	Wwp1		NM_022882	Lpin2
NM_001286263	Ralgapa1		NM_144788	Hectd1		NM_172650	Kctd3
NM_011246	Rasgrp1		NM_019798	Pde4a		NM_013595	Mbd3
NM_027258	Rnf157		NM_001134459	Prickle2		NM_026969	Sec31a
NM_001291137	Ralgapb		NM_019763	Spen		NM_001145807	Brinp3
NM_001029934	Usp32		NM_182993	Slc17a7		NM_001033254	Pak6
NM_181039	Adgrl1		NM_176850	Bptf		NM_008832	Phka1
NM_011749	Zfp148		NM_001081344	Stxbp5		NM_001033422	Thoc2
NM_030238	Dync1h1		NM_001033258	Arfgef3		NM_172683	Pogz
NM_001252313	Ncor1		NM_001170669	Pde8b		NM_175105	Aqp11
NM_001024952	Rc3h1		NM_001110275	Itsn1		NM_027996	Zswim8
NM_001281491	Syngap1		NM_139149	Fus		NM_015731	Atp9a
NM_001081370	Shank2		NM_008957	Ptch1		NM_178076	Mcf2l
NM_007561	Bmpr2		NM_001014973	Snx13		NM_001039106	Ddhd1
NM_033565	Aff4		NM_028940	Clvs1		NM_021531	Carm1
NM_001033550	Lrrc8b		NM_001161362	Ppp2r3a		NM_172695	Plaa
NM_010414	Htt		NM_001044308	Cacna1i		NM_024196	Tbc1d20
NM_001128308	Dock9		NM_080558	Ssfa2		NM_177646	Dgkd
NM_172298	Tshz3		NM_009231	Sos1		NM_146028	Stac2
NM_029633	Clasp2		NM_173440	Nrip1		NM_001162906	2410089E03Rik
NM_001013806	Ankrd13c		NM_033218	Srebf2		NM_146145	Jak1
NM_007907	Eef2		NM_133648	Slc12a6		NM_178888	Garnl3
NM_001081362	Trrap		NM_172924	Peak1		NM_144560	Gas2l1
NM_008729	Ctnnd2		NM_177184	Vps13c		NM_029365	Med25
NM_029166	Uhrf1bp1l		NM_027088	Bap1		NM_001033430	Kdm7a
NM_008306	Ndst1		NM_007988	Fasn		NM_198942	Dhx57
NM_173028	Vps13a		NM_001289682	Arhgap33		NM_029665	Ipo11
NM_001024857	Ttbk2		NM_001081293	Rprd2		NM_021314	Tacc2
NM_001289474	Erbb2ip		NM_028096	2010300C02Rik		NM_175930	Rapgef5
NM_001160319	Ubr4		NM_001163480	Neurl1a		NM_027478	Tmem230
NM_172771	Dmxl2		NM_018878	Paxip1		NM_013649	Ryk
NM_001024624	Cdkl5		NM_001145836	Ralgds		NM_172755	Sugp2
NM_026484	Ccny		NM_001290818	Adrbk1		NM_178923	Scaf4
NM_011273	Xpr1		NM_022022	Ube4b		NM_001177648	Fnbp1
NM_183208	Zmiz1		NM_001291150	Ptprt		NM_146014	Ccm2
NM_001004144	Git1		NM_001282994	Cobl		NM_001111052	Dclk1
NM_001134383	Iqsec1		NM_023543	Chn2		NM_001271857	Add2
NM_001080819	Arid1a		NM_001080814	Fat3		NM_016962	Spast
NM_178679	Zfp365		NM_001163643	Map3k12		NM_001081132	Upf2
NM_010434	Hipk3		NM_001204229	Clec16a		NM_001302266	Aktip
NM_001013741	Ddn		NM_175407	Sobp		NM_011866	Pde10a
NM_001114664	Iqsec2		NM_001004164	Gnptab		NM_130885	Oxr1
NM_008168	Grik5		NM_001004177	Celsr2		NM_026910	Tnik
NM_133207	Kcnh7		NM_011286	Rph3a		NM_178029	Setd1a
NM_001033285	Cdc42bpa		NM_053170	Trim33		NM_201518	Flrt2
NM_010418	Herc2		NM_019967	Brinp1		NM_001143790	Ctc1
NM_054050	Rapgef1		NM_001042491	Anapc5		NM_001159633	Slc44a1
NM_001080931	Med13		NM_139294	Braf		NM_001033348	Ralgapa2
NM_001033173	Usp31		NM_001081028	Sipa1l3		NM_022312	Tnr
NM_138679	Ash1l		NM_001163574	Tjp1		NM_033526	Ubqln4
NM_008719	Npas2		NM_001290313	Wnk2		NM_001293668	Atp11a
NM_181071	Tanc2		NM_001114399	Zmym4		NM_178615	Rgmb
NM_001290715	Adgrb2		NM_001110253	Fyco1		NM_001163774	Taok2
NM_176942	Gabra5		NM_007938	Epha6		NM_144843	Mtmr6
NM_181750	R3hdm1		NM_001198787	Aatk		NM_001081161	Fam171a1
NM_001024602	Cep170b		NM_008173	Nr3c1		NM_177301	Hnrnpl
NM_028601	Zmiz2		NM_011159	Prkdc		NM_172477	Dennd2a
NM_172994	Ppp2r2c		NM_026137	Wdr13		NM_001290636	Dock7
NM_015753	Zeb2		NM_019439	Gabbr1		NM_144557	Myrip
NM_001006664	Epb41l1		NM_001099288	Arhgap44		NM_001024931	Rbfox3
NM_175162	Stox2		NM_173444	Nbeal1		NM_028792	Josd1
NM_008904	Ppargc1a		NM_001177720	Madd		NM_153484	Tef
NM_001102430	Arfgef1		NM_181517	Ipo7		NM_144925	Tnrc6a
NM_172827	Lnpep		NM_001012765	Adcy5		NM_001081141	Gabbr2
NM_001036684	Atp2b2		NM_144796	Susd4		NM_011065	Per1
NM_138659	Prpf8		NM_001033222	Pdzd8		NM_198022	Tnrc6c
NM_172424	Med13l		NM_172910	Dlgap2		NM_001190187	Nrg3
NM_001081116	Arhgef17		NM_008881	Plxna1		NM_001081306	Ptprz1
NM_080448	Srgap3		NM_028487	Gpbp1		NM_028966	Samd4
NM_008449	Kif5c		NM_172809	Sacs		NM_009409	Top2b
NM_001081371	Dmxl1		NM_011083	Pik3c2a		NM_001040400	Tet2
NM_175310	Pds5b		NM_029709	Clasp1		NM_207239	Gtf3c1
NM_001303033	Ubr3		NM_008817	Peg3		NM_029436	Klhl24
NM_001081035	Nav3		NM_001113389	Dyrk1a		NM_028887	Smchd1
NM_153413	Dock3		NM_007619	Cbl		NM_001081225	Fam178a
NM_177798	Frs2		NM_054081	Mta1		NM_199065	Slitrk1
NM_001289472	Pitpnm2		NM_027629	Pgm2l1		NM_007830	Dbi
NM_013675	Sptb		NM_001267796	Igip		NM_019715	Kcmf1
NM_008226	Hcn2		NM_011029	Rpsa		NM_009790	Calm1
NM_001081360	Camsap2		NM_183300	Zfyve9		NM_175375	Ankhd1
NM_001033276	Kmt2d		NM_001024955	Pik3r1		NM_010771	Matr3
NM_173018	Myo9a		NM_177261	Kndc1		NM_145528	Atg13
NM_001037877	Tcf25		NM_001093776	Myt1l		NM_011213	Ptprf
NM_028816	Xpo6		NM_001039079	Prkcz		NM_026670	Zmym1
NM_021423	Shank3		NM_173776	Maml2		NM_011324	Scnn1a
NM_010956	Ogdh		NM_001164493	Klhl29		NM_011750	Sf1
NM_011104	Prkce		NM_001168505	Shoc2		NM_207213	Snx25
NM_054040	Tulp4		NM_178060	Thra		NM_010322	Gnpat
NM_019445	Fmn2		NM_172151	Zdhhc8		NM_001039173	Dok6
NM_172261	Ppp1r9b		NM_001144953	Vwa5b2		NM_181417	Csrp2bp
NM_001253905	Ncor2		NM_001098172	Pcdh10		NM_173446	Fam155a
NM_145617	Herc1		NM_009428	Trpc5		NM_001159404	Llgl1
NM_007772	Hivep1		NM_145514	Wdr26		NM_025729	Tab3
NM_001039198	Zfhx2		NM_148948	Dicer1		NM_001081419	Dip2a
NM_016698	Rnf10		NM_177192	Dennd5b		NM_001033261	Zfc3h1
NM_172836	9930021J03Rik		NM_133360	Acaca		NM_001291017	Pdxdc1
NM_023328	Agtpbp1		NM_001033213	Ttc7b		NM_172015	Iars
NM_001163262	Cmip		NM_175481	Grik4		NM_001042623	Phc1
NM_197943	Sgsm2		NM_011931	Rfwd2		NM_001103166	Pcbp2
NM_009167	Shc3		NM_016716	Cul3		NM_178404	Zc3h6
NM_008224	Hcfc1		NM_011858	Tenm4		NM_173423	Fem1c
NM_013883	Scmh1		NM_001081426	Dip2c		NM_007712	Clk2
NM_027526	Rasgef1a		NM_026003	Smarca2		NM_201646	Btbd6
NM_031881	Nedd4l		NM_008139	Gnaq		NM_019681	Ncs1
NM_001033634	Zyg11b		NM_021921	Mapk8ip2		NM_001024927	Pitpnm3
NM_001083906	Nr3c2		NM_133821	Phlpp1		NM_027135	Sec24d
NM_009572	Zhx1		NM_008712	Nos1		NM_001136104	Abl2
NM_001286260	Nfat5		NM_001033322	Gucy1a2		NM_181400	Wdr47
NM_001271809	Pcdh11x		NM_001114096	Smarcc2		NM_001302637	Cacna1d
NM_027707	Nipbl		NM_001033962	Ube3a		NM_181073	Plekhh1
NM_007566	Birc6		NM_001290814	Aff3		NM_001110783	Ank1
NM_178880	Son		NM_001085355	Arid1b		NM_001081229	Tsc22d2
NM_001114140	Tcf20		NM_183225	Usp24		NM_011207	Ptpn3
NM_001242558	Ncoa6		NM_172381	AI314180		NM_145732	Ctnna2
NM_027293	Dopey2		NM_001291077	Snph		NM_011643	Trpc1
NM_178065	Arel1		NM_027144	Arhgef12		NM_001079849	Paip1
NM_001290427	Frmpd4		NM_010657	Hivep3		NM_181732	Aida
NM_133500	Ntng2		NM_138667	Tab2		NM_175028	Adnp2
NM_031186	Ndst3		NM_010408	Hcn1		NM_153521	Lrrc41
NM_181058	Zbtb20		NM_130893	Scrt1		NM_008129	Gclm
NM_001177667	Sptan1		NM_027901	Gtf3c2		NM_019990	Stard10
NM_008448	Kif5b		NM_026164	Pnpla8		NM_001099299	Ajap1
NM_001001983	Pi4ka		NM_008851	Pitpnm1		NM_001177884	Whsc1
NM_007881	Atn1		NM_170599	Igsf11		NM_207636	Fndc3a
NM_198618	Dlgap3		NM_019945	Mast1		NM_027694	Golga7b
NM_025877	Slc25a23		NM_026376	Plxnd1		NM_001083320	Magi1
NM_001276465	Vps13d		NM_201616	Gnas		NM_007698	Chrm1
NM_001164268	Kalrn		NM_011056	Pde4d		NM_026402	Atg3
NM_001081030	Sbf1		NM_010307	Gnal		NM_184088	Dennd4c
NM_023868	Ryr2		NM_008748	Dusp8		NM_013625	Pafah1b1
NM_001277986	Snap91		NM_019827	Gsk3b		NM_177561	Usp46
NM_001081290	Prrc2c		NM_001122952	Nfia		NM_009483	Kdm6a
NM_173068	Syt7		NM_001099637	Cep170		NM_025852	Rexo1
NM_133975	Trip12		NM_019427	Epb41l4b		NM_145456	Zswim6
NM_010687	Large		NM_001081379	Ankrd11		NM_011960	Parg
NM_001005424	Gm996		NM_001290702	Tenm2		NM_001172098	Strn3
NM_001165988	Ubap2l		NM_013720	Mga		NM_146241	Trhde
NM_011743	Zfp106		NM_011086	Pikfyve		NM_181347	Dennd1b
NM_001163024	Mon2		NM_024226	Rtn4		NM_001201413	Apbb2
NM_008839	Pik3ca		NM_027604	Usp15		NM_009194	Slc12a2
NM_138306	Dgkz		NM_010137	Epas1		NM_028194	Fryl
NM_009569	Zfpm1		NM_016759	Rundc3a		NM_177093	Lrrc58
NM_001193305	Mical2		NM_026147	Rps20		NM_008800	Pde1b
NM_001271679	Wnk3		NM_011385	Ski		NM_172694	Megf9
NM_001081170	Pacs2		NM_001037709	Rusc2		NM_183020	Atxn2l
NM_133189	Cacng7		NM_172805	Kcnh5		NM_178795	Ppip5k1
NM_001271798	Pcdh9		NM_024225	Snx5		NM_178027	Vps26b
NM_001025572	Ankrd12		NM_177049	Jph4		NM_011492	Stk11
NM_178005	Lrrtm2		NM_001037136	Agap1		NM_001190846	Kat2b
NM_177151	Vps13b		NM_001014981	Wdr7		NM_183188	Rbfox1
NM_172430	Sphkap		NM_001114125	Dab2ip		NM_172442	Dtx4
NM_016788	Tnk2		NM_152923	Kcnq3		NM_030180	Usp54
NM_178078	Cnot1		NM_001081242	Tln2		NM_029036	S100pbp
NM_178407	Arap2		NM_011789	Apc2		NM_009717	Neurod6
NM_001162917	Dennd4a		NM_011393	Slc1a2		NM_198107	Med16
NM_178725	Lrrc4c		NM_172409	Fmnl2		NM_001198861	Ctbp1
NM_001177396	Anks1b		NM_177324	Sbf2		NM_133857	Usp53
NM_001081383	Kmt2c		NM_001081300	Tshz1		NM_021350	Chml
NM_080633	Aco2		NM_001163026	Dnajc13		NM_024212	Rpl4
NM_029498	Zmym2		NM_198114	Dagla		NM_027513	Nup205
NM_008739	Nsd1		NM_001025431	Btbd3		NM_172257	Sidt2
NM_011323	Scn8a		NM_001123327	Qser1		NM_007906	Eef1a2
NM_026556	Dynll2		NM_030168	Rictor		NM_177673	Cep104
NM_008171	Grin2b		NM_177124	Tnrc6b		NM_021516	Mark3
NM_029935	Chst15		NM_001171054	Mta3		NM_029409	Mff
NM_197987	Trim37		NM_024272	Ssbp2		NM_019790	Tmeff2
NM_011240	Ranbp2		NM_001098528	Kcnb2		NM_011116	Pld3
NM_001040682	Clmn		NM_030110	Micu3		NM_001112700	Cyth1
NM_024191	Arl2bp		NM_001033279	D17Wsu92e		NM_008417	Kcna2
NM_175513	Zfp804a		NM_175561	Pcnx2		NM_001168321	Bcor
NM_172664	Tlk1		NM_001033536	Rfx7		NM_009282	Stag1
NM_008855	Prkcb		NM_001122730	Tnrc18		NM_008636	Mtf1
NM_001081017	Unc79		NM_021323	Usp29		NM_001163513	Dlg5
NM_019933	Ptpn4		NM_015771	Lats2		NM_172804	Syt16
NM_010748	Lyst		NM_001025429	Spag9		NM_176930	Nrcam
NM_001114613	Stxbp5l		NM_001081302	Trio		NM_008808	Pdgfa
NM_009826	Rb1cc1		NM_198702	Adgrl3		NM_026748	Ints1
NM_001252453	Ptprs		NM_177231	Arrb1		NM_001159637	Nadk
NM_025943	Dzip1		NM_008997	Rab11b		NM_178740	Slitrk4
NM_001003672	Pcdhac2		NM_134013	Psme4		NM_145711	Tox
NM_011571	Tesk1		NM_173369	Cyld		NM_011370	Cyfip1
NM_175466	Zfp770		NM_001163175	Begain		NM_020494	Ddx24
NM_001290656	Mbd5		NM_026604	Fam135a		NM_010600	Kcnh1
NM_001081055	Trappc10		NM_008413	Jak2		NM_017377	B4galt2
NM_001099624	Rapgef2		NM_009783	Cacna1g		NM_001290683	Smap1
NM_001081298	Adgrl2		NM_172965	Sap130		NM_001168255	Slc45a4
NM_001168292	R3hdm2		NM_175211	Ralgps1		NM_017374	Ppp2cb
NM_145390	Tnpo2		NM_172662	Gtdc1		NM_001081182	Atp8b2
NM_001008422	Scaf1		NM_028451	Larp1		NM_010199	Fgf12
NM_001080932	Foxk2		NM_172859	Dzank1		NM_019791	Maged1
NM_001252436	Dlg1		NM_029094	Pik3cb		NM_145525	Osbpl6
NM_001004062	Crtc1		NM_001001144	Scap		NM_172120	Vps41
NM_172752	Sorbs2		NM_001081064	Pdzd2		NM_133752	Opa1
NM_008678	Ncoa2		NM_001033347	D430041D05Rik		NM_174852	Phf12
NM_001286713	Tsc2		NM_198298	Helz		NM_177284	Nrxn1
NM_001136260	Slc4a4		NM_001198571	Abi2		NM_001081316	Dsel
NM_001081016	Zc3h7b		NM_001164483	Synj1		NM_133722	Abhd17c
NM_172803	Dock4		NM_153459	Dusp7		NM_008379	Kpnb1
NM_011889	2003-09-01		NM_001135019	Zfp266		NM_001285811	Dtna
NM_009295	Stxbp1		NM_001165989	Ckap5		NM_175478	Lrfn3
NM_008032	Aff2		NM_001039472	Kif21b		NM_001271589	Eps8
NM_173066	Ep400		NM_001143834	Grm5		NM_177643	Zfp281
NM_133781	Cab39		NM_181595	Ppp1r9a		NM_145577	Zfp772
NM_177805	Fam179b		NM_001256431	Agap3		NM_001033383	Zfp865
NM_175114	Trak1		NM_001045524	Cep126		NM_027910	Klhdc3
NM_177832	Zfp236		NM_001193266	Mdga2		NM_024203	Fam120b
NM_001162864	Ttbk1		NM_177077	Exoc6b		NM_053100	Trim8
NM_008844	Pip5k1c		NM_198420	Arhgap39		NM_001005385	Gprasp1
NM_022565	Ndst4		NM_144825	Taok1		NM_001252332	Sept8
NM_198010	Ankrd17		NM_010890	Nedd4		NM_001290813	Ablim1
NM_177215	Ocrl		NM_001029873	Unc13a		NM_080428	Fbxw7
NM_001099298	Scn2a1		NM_009027	Rasgrf2		NM_001081353	2210408I21Rik
NM_001291186	Abr		NM_177855	Med12l		NM_026574	Ino80
NM_027727	Dym		NM_198865	Slitrk5		NM_021366	Klf13
NM_026856	Zfp644		NM_001081458	Ppp2r5c		NM_001033242	Cln5
NM_007459	Ap2a2		NM_009029	Rb1		NM_001080755	Zzz3
NM_001081251	Pbrm1		NM_153125	Sec16a		NM_007840	Ddx5
NM_001205239	Parp6		NM_009124	Atxn1		NM_010731	Zbtb7a
			NM_178930	Gbf1		NM_001081009	Parp8
			NM_001081152	Npat		NM_001198866	Dctn1
			NM_198625	Mtss1l		NM_146087	Csnk1a1
			NM_145959	Fam91a1		NM_172707	Ppp1cb
			NM_001291119	Neurl4		NM_026375	Ahctf1
			NM_178363	Ylpm1		NM_001252189	Epn2
			NM_153131	Unc5a		NM_172614	Tmem44
			NM_009261	Strbp		NM_016902	Nphp1
			NM_144515	Zfp52		NM_172690	Phf24
			NM_001081068	Ltn1		NM_001098233	Purg
			NM_177208	Dopey1		NM_001164639	Slk
			NM_028392	Ppp2r2b		NM_001037846	Cnot2
			NM_021450	Trpm7		NM_025944	Tmem246
			NM_001015046	Rap1gap2		NM_001082414	Sh3d19
			NM_001243044	Ap1b1		NM_008421	Kcnc1
			NM_001163387	Nlgn1		NM_175353	Exoc6
			NM_015820	Hs6st3		NM_146054	Fermt2
			NM_021899	Foxj2		NM_009974	Csnk2a2
			NM_001290528	Map3k10		NM_001177697	Ablim2
			NM_010630	Kifc2		NM_025709	Gapvd1
			NM_145452	Rasa1		NM_001033166	2700094K13Rik
			NM_008914	Ppp3cb		NM_173053	Limk2
			NM_173437	Nav1		NM_001267622	Ttc28
			NM_001291214	Myo18a		NM_001081354	Mamld1
			NM_177006	Nwd2		NM_010078	Drp2
			NM_175750	Plxna4		NM_053014	Agpat3
			NM_172806	Btbd7		NM_145434	Nr1d1
			NM_001081557	Camta1		NM_001038999	Atp8a1
			NM_001013386	Rasl10b		NM_001290741	Cnot6
			NM_029348	Zbtb4		NM_001081098	Zfp362
			NM_001018042	Sp3		NM_001038627	Smurf1
			NM_172819	Dip2b		NM_019413	Robo1
			NM_011352	Sema7a		NM_001081235	Mn1
			NM_001161747	Palm		NM_001081656	Neurl1b
			NM_010308	Gnao1		NM_178113	Ncapd3
			NM_001110780	Syn1		NM_029784	Fam81a
			NM_134063	Fam208b		NM_010602	Kcnj11
			NM_010106	Eef1a1		NM_010763	Man1a2
			NM_029933	Bcl9		NM_080437	Celsr3
			NM_028291	Pan3		NM_027427	Taf15
			NM_011845	Mid2		NM_013771	Yme1l1
			NM_001166164	Ccdc74a		NM_031396	Cnnm1
			NM_010412	Hdac5		NM_019565	Zfp386
			NM_172903	Man2a2		NM_134105	Txndc11
			NM_178395	Zdhhc2		NM_001033375	A230046K03Rik
			NM_028777	Sec14l1		NM_183028	Pcmtd1
			NM_030702	Senp3		NM_138305	Adcy3
			NM_144868	Pcnx3		NM_001177975	Irak1
			NM_020508	Brd4		NM_133347	Dhx30
			NM_133665	Mef2d		NM_145942	Hmgcs1
			NM_194341	Synrg		NM_001163126	Cog5
			NM_008702	Nlk		NM_172493	Diaph2
			NM_001166398	Armcx2		NM_199068	Foxk1
			NM_177819	Fam135b		NM_021415	Cacna1h
			NM_001113386	Lifr		NM_175522	Elfn1
			NM_010200	Fgf13		NM_016738	Rpl13
			NM_001081288	Taf2		NM_001081392	Mdn1
			NM_001098837	Atxn7l3		NM_080287	Elmo2
			NM_011250	Rbl2		NM_178246	Smg5
			NM_009147	Sec23a		NM_153049	Mkl1
			NM_008913	Ppp3ca		NM_181577	Ccdc85a
			NM_001007573	Maneal		NM_175489	Osbpl8
			NM_027626	Psd3		NM_009211	Smarcc1
			NM_009384	Tiam1		NM_001304575	Vezt
			NM_146193	Btbd1		NM_021346	Zfp318
			NM_011062	Pdpk1		NM_011818	Gmcl1
			NM_001003918	Usp7		NM_013807	Plk3
			NM_001035854	Ap2b1		NM_153679	Cpt1c
			NM_015806	Mapk6		NM_027230	Zmynd8
			NM_001168304	Cdk19		NM_001289916	Rora
			NM_198967	Tmtc1		NM_024266	Rps25
			NM_001081418	Gltscr1		NM_001083121	Enah
			NM_001045513	Raph1		NM_022655	Ireb2
			NM_001142642	Fbrsl1		NM_133829	Mfsd6
			NM_207221	Jmjd1c		NM_198003	Zfp946
			NM_027118	Cdk13		NM_030179	Clip4
			NM_001163635	Tnks2		NM_175331	Nt5dc3
			NM_001302635	Phactr1		NM_001163455	Tbck
			NM_030266	Inpp4a		NM_194348	Atg2a
			NM_001302384	March8		NM_030692	Sacm1l
			NM_001033420	Dock1		NM_013812	Cdk2ap1
			NM_172829	St6gal2		NM_176834	Rnf208
			NM_007804	Cux2		NM_011035	Pak1
			NM_025730	Lrrk2		NM_033523	Spred2
			NM_001033351	Grin3a		NM_001302342	Dvl1
			NM_010251	Gabra4		NM_133247	Usp33
			NM_001163632	Satb1		NM_001290353	Zfp37
			NM_001290770	Tro		NM_001242372	Gon4l
			NM_015794	Fbxl17		NM_001164498	Papd5
			NM_001081750	Zfp664		NM_001270988	Asxl2
			NM_001276360	Camsap1		NM_172624	Dpp9
			NM_153396	Mical3		NM_026542	Slc25a39
			NM_001081034	Fbxo11		NM_001163467	Phtf1
			NM_001290646	Lhx2		NM_020506	Xpo4
			NM_029426	Brsk2		NM_001290729	Taf1
			NM_011211	Ptprd		NM_001278075	Farsb
			NM_025481	Smurf2		NM_178892	Tiparp
			NM_001112723	Arhgef10l		NM_026252	Cpeb4
			NM_009469	Ulk1		NM_001252497	Rapgef6
			NM_013892	Pcsk1n		NM_001204875	Set
			NM_008882	Plxna2		NM_027121	Vkorc1l1
			NM_001008506	Zc3h14		NM_029751	Rpl18a
			NM_008746	Ntrk3		NM_145128	Mgat5
			NM_177296	Tnpo3		NM_001163623	Prepl
			NM_001040398	Setd1b		NM_207523	Rpl23a
			NM_001159964	Eps15		NM_001001980	Limch1
			NM_172663	Epc2		NM_020012	Rnf14
			NM_001111304	Tbc1d9		NM_026165	Slc25a46
			NM_001081279	Mfhas1		NM_153569	Gak
			NM_001159567	Meis2		NM_027554	Usp38
			NM_175260	Myh10		NM_001164659	Trank1
			NM_133910	Tbc1d14		NM_025500	Mrpl37
			NM_178651	Slc30a9		NM_153103	Kif1c
			NM_001004361	Tpgs2		NM_027375	Gcc2
			NM_009938	Copa		NM_178851	Vps39
			NM_001146027	Rnf44		NM_010277	Gfap
			NM_023579	Ipo5		NM_001007574	A830010M20Rik
			NM_010050	Dio2		NM_178398	Wipi2
			NM_025788	Nacc1		NM_008241	Foxg1
			NM_001252310	Fam19a5		NM_001146318	Cnp
			NM_019737	B4galt6		NM_025691	Srp72
			NM_001290633	Reps2		NM_027706	Nbas
			NM_153403	Ago1		NM_001081061	Bdp1
			NM_176841	Ccdc88a		NM_019588	Plce1
			NM_011145	Ppard		NM_001081567	Mapk10
			NM_178874	Tmcc2		NM_021521	Med12
			NM_013476	Ar		NM_177341	Trpm3
			NM_028319	Zfp518a		NM_178633	Klhl2
			NM_144946	Neto1		NM_133215	Mtmr4
			NM_028759	Dcaf6		NM_178634	Csrnp3
			NM_138953	Ell2		NM_010250	Gabra1
			NM_001197322	Foxp1		NM_152825	Usp45
			NM_198864	Slitrk3		NM_026236	Wdr48
			NM_001127363	Inpp5a		NM_001198969	Itsn2
			NM_001163610	Nhsl2		NM_013630	Pkd1
			NM_001081348	Hecw1		NM_019679	Fmnl1
			NM_001163688	Ptpra		NM_010795	Mgat3
			NM_172703	Eif4g3		NM_001285458	Fmn1
			NM_022419	Abhd8		NM_011828	Hs2st1
			NM_177994	R3hdm4		NM_009696	Apoe
			NM_172867	Zfp462		NM_011994	Abcd2
			NM_010508	Ifnar1		NM_022029	Nrgn
			NM_026521	Zfp706		NM_001164804	Coro2a
			NM_028385	Setd5		NM_001289654	Fhod3
			NM_015802	Dlc1		NM_052835	Rpl10
			NM_172513	Fam126b		NM_178681	Dgkb
			NM_175155	Sash1		NM_001177982	Pde4b
			NM_001145897	Gse1		NM_011714	Baz1b
			NM_030563	N4bp1		NM_008133	Glud1
			NM_029851	Dync2h1		NM_001115150	Uspl1
			NM_145941	Eif4g1		NM_175189	Hepacam
			NM_019697	Kcnd2		NM_019430	Cacng3
			NM_001024837	Adarb1		NM_183034	Plekhm1
			NM_053167	Trim9		NM_028072	Sulf2
			NM_173368	Chd6		NM_015801	Pnpla6
			NM_027045	Ccser2		NM_001001986	Nol4l
			NM_011264	Rev3l		NM_145138	Nek9
			NM_008846	Pip5k1b		NM_008136	Gnl1
			NM_001081114	Clip3		NM_146142	Tdrd7
			NM_153774	Ipo9		NM_177472	Slx4
			NM_181850	Grm3		NM_001163564	Naf1
			NM_010147	Epn1		NM_026825	Lrrc16a
			NM_018797	Plxnc1		NM_001161431	Slitrk2
			NM_001130169	Zfp207		NM_024465	Abhd12
			NM_001129787	Igsf9b		NM_172947	Lsm12
			NM_133791	Wwc2		NM_183256	Cox14
			NM_011822	Pigq		NM_001081118	Phrf1
			NM_001081255	Lrch3		NM_001033463	Tatdn2
			NM_177725	Lrrc8a		NM_011958	Orc4
			NM_001001735	Whsc1l1		NM_001276358	Kcnip2
			NM_001284373	Atf2		NM_011520	Sdc3
			NM_146224	Zfp280d		NM_001252253	Nf2
			NM_011297	Rps24		NM_021399	Bcl11b
			NM_001159604	Pum1		NM_026893	Dcaf12
			NM_001081179	Heatr5b		NM_172671	Lgr4
			NM_008052	Dtx1		NM_001085440	Smcr8
			NM_009782	Cacna1e		NM_001195083	Phc2
			NM_001159662	Ppp1r16b		NM_181318	Rasgef1b
			NM_001080706	Btaf1		NM_001163379	Agpat1
			NM_001172152	Wdr17		NM_152816	Dnm1l
			NM_001033273	5031439G07Rik		NM_178782	Bcorl1
			NM_201407	Dennd4b		NM_177164	Vwc2l
			NM_011215	Ptprn2		NM_175191	Gpr22
			NM_007873	Doc2b		NM_024288	Rmnd5a
			NM_021539	Wsb2		NM_030719	Gatsl2
			NM_025596	Prelid1		NM_001024717	Gal3st3
			NM_029792	B3gat1		NM_001112705	Tlk2
			NM_020605	Jph3		NM_016893	Fut8
			NM_001165902	Ctnnb1		NM_012042	Cul1
			NM_011774	Slc30a4		NM_001033196	Znfx1
			NM_172688	Map3k7		NM_177594	Mtmr9
			NM_053009	Zfp91		NM_182930	Plekha6
			NM_028410	Prkrir		NM_025808	Lztr1
			NM_001025364	Rtn2		NM_133949	Ptov1
			NM_027498	Sik3		NM_001162943	Dchs1
			NM_007499	Atm		NM_001165999	Lingo2
			NM_009072	Rock2		NM_024124	Hdac9
			NM_026174	Entpd4		NM_001177778	Dlg3
			NM_030675	Krit1		NM_175752	Chn1
			NM_011546	Zeb1		NM_013843	Zfp53
			NM_008155	Gpi1		NM_015735	Ddb1
			NM_024473	BC005537		NM_023220	Sppl2a
			NM_010058	Dmwd		NM_175256	Heg1
			NM_176893	Mink1		NM_001081422	Bod1l
			NM_001035226	Xpo1		NM_001008550	Zfyve26
			NM_175115	Ikzf5		NM_025586	Rpl15
			NM_011986	Ncdn		NM_001253819	Tmem184b
			NM_018788	Extl3		NM_001163471	Hectd2
			NM_172932	Nlgn3		NM_013908	Fbxw5
			NM_011112	Papola		NM_138748	Ptpa
			NM_001093750	Ptchd1		NM_010282	Ggps1
			NM_001013749	Tmem151b		NM_172674	Phf20
			NM_009155	Sepp1		NM_030057	Trappc6b
			NM_011625	Ppp1r13b		NM_001164491	Ablim3
			NM_030732	Tbl1xr1		NM_007460	Ap3d1
			NM_026952	Cdk12		NM_178589	Tnfrsf21
			NM_146152	Ipo13		NM_175158	Utp20
			NM_021537	Stk25		NM_145981	Phyhip
			NM_027937	Caskin1		NM_010206	Fgfr1
			NM_019426	Atf7ip		NM_001177374	Ubr2
			NM_001100449	Taf4b		NM_010633	Uhmk1
			NM_212438	Wiz		NM_028379	Zdhhc4
			NM_008624	Mras		NM_175445	Rassf2
			NM_199308	Mast3		NM_172919	Zfp846
			NM_030256	Bcl9l		NM_176940	Nwd1
			NM_026033	Gatad1		NM_023912	Scyl1
			NM_001003912	Arhgef11		NM_001252490	Osbpl1a
			NM_133766	Efr3a		NM_152818	Osbp2
			NM_153140	Rab11fip3		NM_001290384	Arhgef9
			NM_019921	Akap10		NM_177412	Tmcc1
			NM_001290535	Ogt		NM_001081652	Nacad
			NM_028722	Msl1		NM_019864	Atr
			NM_001170556	Prkag2		NM_145131	Pitrm1
			NM_201637	Chd8		NM_173378	Trp53bp2
			NM_028904	Rmi1		NM_013762	Rpl3
			NM_178602	Polr2m		NM_009438	Rpl13a
			NM_027994	Cand1		NM_177740	Rgma
			NM_001081678	Zfp800		NM_172684	Rsbn1
			NM_001013753	Pcdh17		NM_028763	Cbx6
			NM_001166644	Zfp651		NM_030235	Avl9
			NM_001272064	Trim24		NM_010123	Eif3a
			NM_010240	Ftl1		NM_001085408	Sdccag3
			NM_172768	Gramd1b		NM_013668	Kdm5c
			NM_009127	Scd1		NM_173742	Rnasek
			NM_177710	Ssh2		NM_001302951	Tle4
			NM_001081388	Rimbp2		NM_030721	Acox3
			NM_057171	Bag6		NM_033269	Chrm3
			NM_153548	E430025E21Rik		NM_177224	Chd9
			NM_177078	Adrbk2		NM_177750	Frmpd3
			NM_172536	Zfp609		NM_019696	Cpxm1
			NM_007458	Ap2a1		NM_001077707	Shprh
			NM_010595	Kcna1		NM_001038010	Kat2a
			NM_018872	Tmem131		NM_024195	Cyb5r4
			NM_001081203	Sbno1		NM_028756	Slc35a5
			NM_080855	Zcchc14		NM_172473	Hace1
			NM_027491	Rragd		NM_198031	Tubgcp3
			NM_001033225	Pnrc1		NM_009454	Ube2e3
			NM_001042528	Cacna1b		NM_178112	Ints8
			NM_145436	Cdc27		NM_178716	Tnpo1
			NM_178723	Zfp385b		NM_001130451	Nfe2l1
			NM_009208	Slc4a3		NM_011204	Ptpn13
			NM_183355	Pbx1		NM_009148	Exoc4
			NM_007923	Elk4		NM_001044371	Rad17
			NM_011844	Mgll		NM_145922	Kcnc4
			NM_011669	Usp12		NM_001159967	Ralgps2
			NM_175356	Pi4kb		NM_001200038	Rubcn
			NM_001004761	Gpr158		NM_028198	Xpo5
			NM_007664	Cdh2		NM_008991	Abcd3
			NM_001170537	Mef2c		NM_026813	Ppp6r2
			NM_026666	Ubn1		NM_009076	Rpl12
			NM_025344	Eif3f		NM_153406	Specc1l
			NM_001081149	Kat6a		NM_025695	Smc6
			NM_009179	St3gal2		NM_178714	Lrfn5
			NM_001256082	Myo7a		NM_175472	Zcchc11
			NM_177038	Trappc8		NM_018818	Chm
			NM_009271	Src		NM_001033606	Acsl3
			NM_001105246	Pcdh19		NM_029090	Naa60
			NM_145155	Wasf3		NM_178267	Zfp827
			NM_001081355	Prdm2		NM_153399	Syne1
			NM_001004436	Wapl		NM_019649	Clptm1
			NM_009652	Akt1		NM_001083927	Tle3
			NM_001135559	Sos2		NM_009624	Adcy9
			NM_177263	Zhx3		NM_001024458	Add1
			NM_175255	Sec24a		NM_028658	Ppp1r21
			NM_010162	Ext1		NM_145465	Stk24
			NM_001173477	Speg		NM_011101	Prkca
			NM_178164	Ptbp3		NM_175272	Nav2
			NM_152809	Csnk1g3		NM_133704	Sec22a
			NM_175537	Zbtb38		NM_144939	Frs3
			NM_207225	Hdac4		NM_029679	Fam65b
			NM_001033253	Plekhg1		NM_010513	Igf1r
			NM_009769	Klf5		NM_009955	Dpysl2
			NM_001081321	Pds5a		NM_026283	Samd8
			NM_175091	Tnks		NM_001163452	Trpc4ap
			NM_029888	Zfp142		NM_172714	Lin54
			NM_176976	Cep295		NM_008514	Lrp6
			NM_001045536	Zzef1		NM_008516	Lrrn1
			NM_001195633	Epg5		NM_178778	Scai
			NM_010772	Maz		NM_001166497	3110052M02Rik
			NM_011417	Smarca4		NM_008302	Hsp90ab1
			NM_207209	Sec24b		NM_008687	Nfib
			NM_029654	Atg2b		NM_001271349	Fbxw11
			NM_139311	Mllt6		NM_009592	Abcb7
			NM_001003909	Ankib1		NM_001033217	Prickle1
			NM_001081423	Ttll5		NM_019579	Mpp5
			NM_001301737	Dnm1		NM_001085508	Tmem8b
			NM_053076	Rtn3		NM_028356	Zbtb25
			NM_010733	Lrrn3		NM_177586	Eif5a2
			NM_175551	Dido1		NM_175751	Zfp608
			NM_146122	Dennd1a		NM_001305284	Mpdz
			NM_023598	Arid5b		NM_175457	Mroh1
			NM_031179	Sf3b1		NM_011102	Prkcg
			NM_001081336	Dgkh		NM_001033399	Gfod1
			NM_008845	Pip4k2a		NM_013511	Epb41l2
			NM_001122758	Pcdh7		NM_172426	Slc24a2
			NM_001081270	Dscaml1		NM_020332	Ank
			NM_178277	Hmgxb3		NM_146121	Rabgap1
			NM_001271727	Trim2		NM_028136	Dhx36
			NM_001017985	C2cd3		NM_008910	Ppm1a
			NM_021361	Nova1		NM_134095	Desi1
			NM_009429	Tpt1		NM_001162996	Eml2
			NM_009048	Reps1		NM_029920	Mtus2
			NM_021506	Sh3rf1		NM_008418	Kcna3
			NM_013767	Csnk1e		NM_001166656	Cdkl3
			NM_147176	Homer1		NM_001285914	Cdh8
			NM_145999	Rhot2		NM_172723	Adap1
			NM_001161854	Csde1		NM_001145820	Gpd2
			NM_145926	Mgat4b		NM_001285991	Tbc1d5
			NM_030695	Lrba		NM_198122	Arid4b
			NM_177267	Dcaf5		NM_008841	Pik3r2
			NM_001252520	Picalm		NM_001159563	Orc3
			NM_001289702	Pde4dip		NM_001130456	Sema6b
			NM_029432	4930402H24Rik		NM_176979	Topbp1
			NM_018798	Ubqln2		NM_001039214	Mex3c
			NM_172449	Bzrap1		NM_177897	B4galnt4
			NM_001290788	Aqr		NM_001177536	Prdm11
			NM_001097623	Trerf1		NM_175245	Mzt1
			NM_001081340	Setd2		NM_028476	Atat1
			NM_133789	Strn4		NM_009182	St8sia3
			NM_021895	Actn4		NM_146239	Cdk17
			NM_010302	Gna12		NM_001014390	Dyrk2
			NM_008981	Ptprg		NM_152895	Kdm5b
			NM_001081378	Kidins220		NM_001081341	Scaper
			NM_019654	Socs5		NM_028446	Trip11
			NM_001290345	Map4k3		NM_177814	Erc2
			NM_001291068	Polr2a		NM_001081196	Hnrnpul2
			NM_146003	Senp6		NM_009746	Bcl7c
			NM_198093	Elmo1		NM_027150	Mlip
			NM_001024205	Nufip2		NM_001205341	Ppfia2
			NM_080793	Setd7		NM_029402	Cul2
			NM_153402	Ago3		NM_054095	Necab2
			NM_018744	Sema6a		NM_172911	D8Ertd82e
			NM_001290634	Ugp2		NM_139150	Carf
			NM_054051	Pip4k2b		NM_001289546	Amph
			NM_198168	Ppp2r5b		NM_001253713	Mbnl1
			NM_001205241	Kat6b		NM_146129	Pcif1
			NM_001037764	Rai1		NM_176954	Celf5
			NM_019472	Myo10		NM_008388	Eif3e
			NM_001122893	Fyn		NM_001113346	Gatad2a
			NM_207255	Zfp532		NM_001013385	Grm4
			NM_031256	Plekha3		NM_007395	Acvr1b
			NM_001081079	Ogfrl1		NM_013918	Usp25
			NM_175238	Rif1		NM_010799	Minpp1
			NM_001284503	Cask		NM_026273	4930453N24Rik
			NM_001286575	Ehmt2		NM_001159492	Gpatch8
			NM_182929	Rims3		NM_001080754	Ambra1
			NM_183221	Fat4		NM_001167910	Mbtps1
			NM_026605	Sympk		NM_178622	Suds3
			NM_022997	Vps35		NM_001015507	Vprbp
			NM_001177616	Arpp21		NM_001282992	Pcnt
			NM_001085495	Arfgef2		NM_009564	Zfp64
			NM_019461	Usp27x		NM_001029878	Lonrf2
			NM_001302886	Prdm4		NM_028993	Mau2
			NM_001167777	Asxl3		NM_138599	Tomm70a
			NM_028945	Fam208a		NM_024262	Smg8
			NM_024244	Fam13c		NM_001085492	Rere
			NM_177338	Hmbox1		NM_007478	Arf3
			NM_001109975	Synpo		NM_144859	Pja2
			NM_001004182	Tmem178b		NM_019571	Tspan5
			NM_183016	Cdc42bpb		NM_021885	Tub
			NM_007788	Csnk2a1		NM_008667	Nab1
			NM_019490	Uso1		NM_001081256	Kdm3b
			NM_009322	Tbr1		NM_001276315	Cdkl2
			NM_177782	Prex1		NM_001081499	Tbc1d8b
			NM_001136085	Uba1		NM_009082	Rpl29
			NM_015743	Nr4a3		NM_001025392	Bclaf1
			NM_172626	Rbm27		NM_011135	Cnot7
			NM_008131	Glul		NM_001164363	Nt5c2
			NM_028806	Phactr3		NM_001177986	Zmym3
			NM_001286944	Jund		NM_207302	Zranb1
			NM_001164169	Pias2		NM_027860	0610010F05Rik
			NM_008071	Gabrb3		NM_031165	Hspa8
			NM_013876	Rnf11		NM_133837	Cdc123
			NM_001128607	Epb41		NM_172436	Slc25a12
			NM_028980	Ppp4r4		NM_172871	Klhl9
			NM_011602	Tln1		NM_021299	Ak3
			NM_199009	Fam160a2		NM_001302380	Cdc37l1
			NM_011361	Sgk1		NM_172508	Dse
			NM_145979	Chd4		NM_001110844	Cacna2d1
			NM_028288	Cul4b		NM_172945	Ankrd13b
			NM_012061	Cadps		NM_001290824	Tubgcp4
			NM_001081056	Xpot		NM_001163319	Tubgcp6
			NM_010243	Fut9		NM_009418	Tpp2
			NM_009513	Nrsn1		NM_178654	Pkn2
			NM_172544	Nrxn3		NM_001025074	Ntrk2
			NM_194462	Akap9		NM_001001182	Baz2b
			NM_001033713	Mef2a		NM_007970	Ezh1
			NM_028014	Tmem94		NM_001033385	Tbc1d32
			NM_016846	Rgl1		NM_027711	Iqgap2
			NM_177214	Snrnp200		NM_001008420	Cdh12
			NM_178279	Pxk		NM_008985	Ptprn
			NM_001024616	Rabl6		NM_139304	Gatad2b
			NM_172653	Slc39a10		NM_001291228	Slit2
			NM_016707	Bcl11a		NM_013830	Prpf4b
			NM_013931	Mapk8ip3		NM_023872	Kcnq5
			NM_012024	Ppp2r5e		NM_138650	Dgkg
			NM_001290421	Flna		NM_009484	Uty
			NM_001034013	Asic2		NM_013865	Ndrg3
			NM_019883	Uba52		NM_032008	Slmap
			NM_007682	Cenpb		NM_001159729	Rab23
			NM_008580	Map3k5		NM_026880	Pink1
			NM_028262	Setd3		NM_199021	Dpp10
			NM_026908	Cab39l		NM_145531	Spg11
			NM_001195496	Dclk2		NM_030035	Golgb1
			NM_030197	Cacul1		NM_007901	S1pr1
			NM_172894	Ppp6r1		NM_009558	Zfp51
			NM_001113351	Synj2		NM_183191	Plch1
			NM_199239	Sema6d		NM_026017	Ctdnep1
			NM_001033443	Cdkl4		NM_011063	Pea15a
			NM_207583	Brinp2		NM_008770	Cldn11
			NM_173784	Ubtd2		NM_001009947	Dock11
			NM_001177630	Etl4		NM_008684	Neo1
			NM_001081241	Fam65a		NM_010347	Aes
			NM_001081011	Srgap2		NM_025949	Rps6ka6
			NM_007930	Enc1		NM_172948	Mgat5b
			NM_001031667	Gsk3a		NM_026570	Yeats4
			NM_020253	Nrxn2		NM_011292	Rpl9
			NM_001110228	Celf2		NM_145958	Kbtbd2
			NM_001290469	Atp1a3		NM_008829	Pgr
			NM_028148	Scaf11		NM_175266	Epm2aip1
			NM_178678	Lrrtm3		NM_172563	Hlf
			NM_001039184	Cep350		NM_144846	Fam49b
			NM_001080388	Mark2		NM_183021	Thada
			NM_001291903	Adcy8		NM_001289576	Tsc1
			NM_001252083	Zfp384		NM_001001804	Ephx4
			NM_178803	Aebp2		NM_001202500	Armcx4
			NM_133853	Magi3		NM_021284	Kras
			NM_010732	Lrrn2		NM_175543	Rab11fip4
			NM_001008791	Whrn		NM_011916	Xrn1
			NM_010472	Agfg1		NM_144860	Mib1
			NM_001040611	Peg10		NM_172747	Kctd13
			NM_145991	Cdc73		NM_011386	Skil
			NM_153560	Fam102a		NM_133741	Snrk
			NM_001164367	Rab11fip2		NM_001039939	Asxl1
			NM_020256	Zbtb33		NM_172591	Fcho2
			NM_011949	Mapk1		NM_009306	Syt1
			NM_152804	Plk2		NM_134101	Psmd2
			NM_001195004	Kat7		NM_008426	Kcnj3
			NM_016774	Atp5b		NM_198710	Sypl
			NM_001007596	Rtn1		NM_008676	Nbr1
			NM_133780	Tpr		NM_183024	Raver2
			NM_001205332	Map4		NM_028320	Adipor1
			NM_183315	Ctxn1		NM_028102	Ddhd2
			NM_011814	Fxr2		NM_026203	Ahi1
			NM_001109042	Kif21a		NM_001025362	Klc1
			NM_012026	Arhgef28		NM_010295	Gclc
			NM_198105	Fam120c		NM_173753	Fnip1
			NM_021458	Fzd3		NM_172719	Gcn1l1
			NM_001081335	Cul9		NM_207667	Fgf14
			NM_029741	Ppfia3		NM_001013025	Tgfbrap1
			NM_028296	Car10		NM_178662	Atcay
			NM_001167918	D830031N03Rik		NM_029891	Nkrf
			NM_176921	6030419C18Rik		NM_001293707	Pip5k1a
			NM_171824	Pgbd5		NM_080561	Rnf216
			NM_010611	Kcnq2		NM_153537	Phldb1
			NM_172617	Zfp523		NM_001033149	Ttc9
			NM_007968	Ewsr1		NM_170593	Disp2
			NM_144837	Ice1		NM_172730	Ccdc174
			NM_053201	Magee1		NM_022982	Rtn4r
			NM_001290628	Vps54		NM_198091	Usp2
			NM_001008231	Daam2		NM_027154	Tmbim1
			NM_021493	Arhgap23		NM_023363	Zfp788
			NM_001290503	Zer1		NM_009084	Rpl37a
			NM_001242411	Srgap1		NM_001164663	Soga1
			NM_175140	Chst8		NM_013813	Epb41l3
			NM_008717	Zfp638		NM_001081295	Arhgef26
			NM_007858	Diaph1		NM_133917	Mlxip
			NM_016920	Atp6v0a1		NM_177462	Zmym6
			NM_172920	Dpy19l1		NM_016973	St6galnac6
			NM_172741	4931406P16Rik		NM_001162465	Dtnb
			NM_001099628	Atad2b		NM_001113413	Rnf13
			NM_001277867	Mphosph9		NM_011421	Smpd1
			NM_017367	Ccni		NM_001177806	Eif2ak4
			NM_023565	Cse1l		NM_011674	Ugt8a
			NM_173781	Rab6b		NM_133825	D1Ertd622e
			NM_175184	Mvb12b		NM_025963	Rps10
			NM_011941	Mapkbp1		NM_175528	E330009J07Rik
			NM_001001984	Kdm2a		NM_001013608	Ercc6l2
			NM_170779	Wwc1		NM_026391	Ppp2r2d
			NM_198007	Ascc3		NM_001177705	Homez
			NM_172443	Tbc1d16		NM_026062	Fam69a
			NM_015822	Fbxl3		NM_009834	Noct
			NM_001110327	Dmtf1		NM_175556	Plch2
			NM_009976	Cst3		NM_001114131	Ppp4r1
			NM_001081473	Zxdb		NM_138948	Cabp7
			NM_033560	Vps37a		NM_001142580	Vipas39
			NM_001034874	Shisa6		NM_172772	Fam63b
			NM_172865	Manea		NM_001039474	Tcerg1
			NM_172655	Hecw2		NM_025287	Spop
			NM_011908	Ubl3		NM_201371	Prmt8
			NM_144908	Galnt11		NM_001111272	Stau2
			NM_133897	Lrrc8c		NM_027748	Taf3
			NM_001290700	Zfp451		NM_145929	Gga1
			NM_001100451	Msl2		NM_018817	Smarcal1
			NM_178707	Zfp592		NM_011203	Ptpn12
			NM_148932	Pom121		NM_026495	Nacc2
			NM_172549	Cabin1		NM_009011	Rad23b
			NM_007964	Evi5		NM_177013	Tmem229a
			NM_172958	Mtmr12		NM_009562	Zfp62
			NM_145484	Zfp758		NM_176962	Zfp944
			NM_173876	Clcn3		NM_023211	Usmg5
			NM_001081337	Sipa1l2		NM_145540	Ints3
			NM_001145999	Zfp710		NM_029878	Tbcd
			NM_001252200	Map4k4		NM_177588	Thnsl1
			NM_001004143	Usp22		NM_001256033	Otud4
			NM_172632	Mapk4		NM_152813	Plcd3
			NM_013885	Clic4		NM_028032	Ppp2r2a
			NM_028059	Zfp654		NM_013768	Prmt5
			NM_211355	Smek1		NM_178405	Atp1a2
			NM_007595	Camk2b		NM_001014974	Ttll4
			NM_172268	Nup214		NM_198014	Slain1
			NM_175143	Qrich1		NM_013823	Kl
			NM_010804	Mllt10		NM_008989	Pura
			NM_144920	Plekha5		NM_021492	Ap3b2
			NM_028715	Fcho1		NM_001290424	Fmr1
			NM_001164086	Homer2		NM_177387	Ust
			NM_199196	Suz12		NM_008284	Hras
			NM_173443	Vcpip1		NM_172884	2900026A02Rik
			NM_153060	Spns2		NM_011221	Purb
			NM_009530	Atrx		NM_010598	Kcnab2
			NM_146170	C87436		NM_009274	Srpk2
			NM_001159963	Fbxl5		NM_001081309	Pik3r4
			NM_172712	Uba6		NM_173002	Zxdc
			NM_001081183	1110037F02Rik		NM_145413	Fam20b
			NM_028116	Pygo1		NM_029078	Pcf11
			NM_173431	Rpgrip1l		NM_016984	Trpc4
			NM_019923	Itpr2		NM_145479	Klhl22
			NM_007842	Dhx9		NM_177381	Cog3
			NM_001034907	Zc3h12b		NM_011285	Rpgr
			NM_134034	Smek2		NM_001080926	Lrp8
			NM_001081111	Tmf1		NM_026664	Vps53
			NM_001285917	Dapk1		NM_001035228	St3gal5
			NM_001038587	Adar		NM_001177691	Gal3st1
			NM_011078	Phf2		NM_138749	Plxnb2
			NM_001081286	Fat1		NM_198304	Nup188
			NM_001081655	Dact3		NM_029711	Arpc2
			NM_001080748	Gtf2i		NM_009458	Ube2b
			NM_134071	Slf1		NM_001163516	Pex5l
			NM_153078	Ehbp1		NM_026530	Mpnd
			NM_194061	D630045J12Rik		NM_001136070	Eif2d
			NM_144922	Hnrnpul1		NM_172783	Phka2
			NM_001252105	Cadps2		NM_008512	Lrp1
			NM_001177379	Cpeb2		NM_178632	Ints7
			NM_031877	Wasf1		NM_010183	Fbrs
			NM_028898	Rptor		NM_201529	Lmo7
			NM_028713	Rftn2		NM_010487	Elavl3
			NM_009671	Ankfy1		NM_025998	Nkain1
			NM_001163187	Plekhb1		NM_172480	Mtrr
			NM_020493	Srf		NM_133218	Zfp704
			NM_001029877	Nova2		NM_145475	Cerk
			NM_027341	Dzip3		NM_008900	Pou3f3
			NM_175642	Adgrb3		NM_009874	Cdk7
			NM_001109873	Cbfa2t3		NM_011290	Rpl6
			NM_001145779	Kif2a		NM_007393	Actb
			NM_134123	Scaf8		NM_015830	Capn15
			NM_172525	Arhgap29		NM_177652	Ryr3
			NM_008503	Rps2		NM_016891	Ppp2r1a
			NM_011067	Per3		NM_001164072	Tank
			NM_028705	Herc3		NM_029870	Crebrf
			NM_010690	Lats1		NM_026121	Bag4
			NM_001159534	Cacna1c		NM_001122978	Casp8ap2
			NM_013765	Rps26		NM_027909	C2cd2l
			NM_207515	Mbnl2		NM_053089	Naa15
			NM_019739	Foxo1		NM_019939	Mpp6
			NM_015744	Enpp2		NM_133911	Adgra3
			NM_001081212	Irs2		NM_001303102	Etv6
			NM_011855	Tenm1		NM_001199009	Dcaf11
			NM_001038612	Olfm1		NM_177167	Ppm1e
			NM_207692	Mapk9		NM_001079901	Repin1
			NM_001128096	Atp13a3		NM_177721	Ranbp6
			NM_024452	Luzp1		NM_029879	Rgs7bp
			NM_199027	Zfp335		NM_026030	Eif2s2
			NM_181415	Atrnl1		NM_177103	Senp5
			NM_153057	Nomo1		NM_018732	Scn3a
			NM_013492	Clu		NM_008001	Fgd1
			NM_001081080	Phf3		NM_021554	Mettl9
			NM_008395	Itch		NM_011929	Clcn6
			NM_001109688	C2cd5		NM_177708	Rtn4rl1
			NM_001198912	Arhgef2		NM_020025	B3galt2
			NM_134027	Med1		NM_145374	Mios
			NM_001166377	Armcx1		NM_148945	Rps6ka3
			NM_001099276	Pik3c2b		NM_053074	Nup62
			NM_001077190	Abi1		NM_153534	Adcy2
			NM_019663	Pias1		NM_146153	Thrap3
			NM_053099	Setbp1		NM_001081382	Zfp777
			NM_153514	Rhobtb2		NM_008688	Nfic
			NM_001012330	Zbtb18		NM_001199431	Dnmt1
			NM_009461	Ubr1		NM_023423	Akirin1
			NM_020608	Cramp1l		NM_009682	Ap3s2
			NM_021465	Stag2		NM_010837	Map6
			NM_010754	Smad2		NM_172439	Inpp5j
						NM_029357	Pcdh1
						NM_001081216	Phip
						NM_133667	Pdk2
						NM_013569	Kcnh2
						NM_012047	Brd7
						NM_172788	Sh3rf3
						NM_133350	Mapre3
						NM_001029912	Zswim5
						NM_001163351	Ntng1
						NM_134076	Abhd4
						NM_001024604	Ankrd28
						NM_021468	Unc13b
						NM_173363	Eif5
						NM_198610	Igsf21
						NM_172643	Zbtb41
						NM_008010	Fgfr3
						NM_009939	Cops2
						NM_199449	Zhx2
						NM_201411	Flrt1
						NM_033552	Slc4a10
						NM_010311	Gnaz
						NM_001243123	Fam193a
						NM_028011	Tom1l1
						NM_009092	Rps17
						NM_173765	Aasdh
						NM_019729	Usp8
						NM_001289653	Nell2
						NM_138595	Gldc
						NM_011544	Tcf12
						NM_173863	Crtc3
						NM_139236	Nol6
						NM_026055	Rpl39
						NM_001081177	Kif13b
						NM_175484	Coro2b
						NM_181322	Ctcf
						NM_001286729	Glcci1
						NM_178143	Prkaa2
						NM_146190	Tubgcp5
						NM_001038698	Elavl4
						NM_053263	Hnrnpa3
						NM_010717	Limk1
						NM_001159908	Zfand2a
						NM_175482	Usp28
						NM_001081078	Lct
						NM_001081022	D430042O09Rik
						NM_172458	Zfp871
						NM_009833	Ccnt1
						NM_001098231	Pdp1
						NM_178624	Fbxl2
						NM_001289895	Tns1
						NM_001199676	Camkk2
						NM_001144855	Ppfia4
						NM_130879	Usp48
						NM_198602	Cux1
						NM_001284523	Larp4
						NM_001289616	Celf3
						NM_052976	Ophn1
						NM_001083319	Ubp1
						NM_010127	Pou6f1
						NM_009472	Unc5c
						NM_001015681	E130308A19Rik
						NM_009025	Rasa3
						NM_146185	Zfp790
						NM_010153	Erbb3
						NM_001285531	Tle1
						NM_001130476	Tpst1
						NM_001290625	Mapkap1
						NM_145962	Pank3
						NM_001163754	Rab3gap2
						NM_001163565	Ptpn5
						NM_013626	Pam
						NM_182994	Arl5a
						NM_013785	Ip6k1
						NM_133819	Ppp1r15b
						NM_029528	Fam131b
						NM_009009	Rad21
						NM_173364	Zfp445
						NM_030261	Sesn3
						NM_001043336	Eml1
						NM_016805	Hnrnpu
						NM_020601	Tbl1x
						NM_173447	Ephb1
						NM_145476	Tbc1d22a
						NM_001134480	Plcxd2
						NM_016980	Rpl5
						NM_144517	Tbc1d19
						NM_001005511	Lmtk3
						NM_001134791	Osbpl9
						NM_008983	Ptprk
						NM_173788	Npr2
						NM_153555	Dcaf8
						NM_133798	Exd2
						NM_011251	Rbm6
						NM_026170	Ergic1
						NM_011020	Hspa4l
						NM_001163849	Tbc1d24
						NM_001302214	Atp5j
						NM_198411	Inf2
						NM_175274	Ttyh3
						NM_027911	Raver1
						NM_001103179	Brwd1
						NM_001040699	Mtmr7
						NM_001253807	Ywhaz
						NM_001290486	Lpar1
						NM_145415	Diexf
						NM_175174	Klhl5
						NM_001253692	Elmod3
						NM_198109	Ssh1
						NM_033370	Copb1
						NM_009801	Car2
						NM_198303	Eif5b
						NM_146176	Cnot3
						NM_001039578	Evi5l
						NM_013926	Cbx8
						NM_001146046	Lrrc49
						NM_133931	Pot1a
						NM_001081158	Cluh
						NM_172516	Dstyk
						NM_021275	Kcna4
						NM_029930	Tcaf1
						NM_028862	Rnf145
						NM_010880	Ncl
						NM_011975	Rpl27a
						NM_178750	Ss18l1
						NM_029836	Tspyl2
						NM_011948	Map3k4
						NM_025630	Aggf1
						NM_021529	Ppp2r3c
						NM_027295	Rab28
						NM_026651	Pomgnt1
						NM_001009978	Pde1a
						NM_029837	Mpped2
						NM_183106	Ttc17
						NM_009730	Atrn
						NM_009094	Rps4x
						NM_134077	Rbm26
						NM_001110351	Sin3a
						NM_026126	Fundc2
						NM_016686	Vezf1
						NM_001085374	Mcc
						NM_018789	Foxo4
						NM_019434	Mcm3ap
						NM_001081232	D5Ertd579e
						NM_001167949	Atp2b4
						NM_001130416	Hdac6
						NM_010248	Gab2
						NM_001011874	Xkr4
						NM_133658	Ercc3
						NM_027357	Psmd1
						NM_027986	Cdadc1
						NM_001170454	Tada2b
						NM_001122676	Zcchc2
						NM_172518	Fbxo42
						NM_026201	Ccar1
						NM_001302803	Mdm4
						NM_001161665	Kif26b
						NM_011800	Cdh20
						NM_001289510	Tecpr2
						NM_010301	Gna11
						NM_001166552	Zbed6
						NM_207223	Acap3
						NM_153538	Zcchc6
						NM_001039139	Camk2g
						NM_016786	Ube2k
						NM_026274	Rspry1
						NM_001122739	Inppl1
						NM_009497	Vamp2
						NM_001111291	Caprin1
						NM_026389	Poldip2
						NM_178708	Pcid2
						NM_001112711	Grk6
						NM_025279	Hnrnpk
						NM_001010833	Mdc1
						NM_144880	Ppp2r5a
						NM_145488	Pex6
						NM_028074	Ddx42
						NM_009721	Atp1b1
						NM_019651	Ptpn9
						NM_008385	Inpp5b
						NM_009609	Actg1
						NM_133702	Nol11
						NM_009098	Rps8
						NM_145070	Hip1r
						NM_011431	Eftud2
						NM_172821	Map3k13
						NM_027326	Mllt3
						NM_013832	Rasal1
						NM_001033194	Gtf3c3
						NM_172606	March6
						NM_026823	Arl8a
						NM_172646	Dnm3
						NM_019789	Kcnip3
						NM_173013	Map1s
						NM_009744	Bcl6
						NM_001291166	Apba2
						NM_013736	Tceb3
						NM_133796	Arhgdia
						NM_183138	Tet3
						NM_001109992	Ptpn11
						NM_080433	Fezf2
						NM_009424	Traf6
						NM_027815	9030624J02Rik
						NM_001109753	Sv2b
						NM_021884	Tsg101
						NM_001110140	Atp2a2
						NM_183173	Sowaha
						NM_030081	Rbsn
						NM_008084	Gapdh
						NM_008165	Gria1
						NM_052993	C1galt1
						NM_008422	Kcnc3
						NM_001172113	Traf7
						NM_138660	Casc3
						NM_198021	Scyl2
						NM_001113208	Ncam2
						NM_133758	Usp47
						NM_133919	Aff1
						NM_153582	Cmtm4
						NM_001162999	Fnip2
						NM_001082553	Rab27b
						NM_019411	Ppp2ca
						NM_172304	Tex10
						NM_001081299	Cdh18
						NM_023799	Mgea5
						NM_138651	Cds2
						NM_207232	Ptpdc1
						NM_139146	Satb2
						NM_001081134	Kcng1
						NM_001167887	Suv420h1
						NM_001114609	Ino80d
						NM_133794	Qars
						NM_001166643	Bcas3
						NM_001252542	Ndor1
						NM_198100	Tbkbp1
						NM_010629	Kifap3
						NM_027171	Camsap3
						NM_001244916	Sall2
						NM_001168591	Lonp2
						NM_029789	Cers2
						NM_172913	Tox3
						NM_033569	Cnnm2
						NM_009800	Car11
						NM_175454	Hid1
						NM_007547	Sirpa
						NM_001080817	Prdm10
						NM_025436	Msmo1
						NM_007467	Aplp1
						NM_001253353	Fam214b
						NM_001136060	Dpp6
						NM_001033432	Heca
						NM_207220	Gpr137
						NM_013533	Gpr162
						NM_013506	Eif4a2
						NM_016711	Tmod2
						NM_145505	Fam160b1
						NM_172710	Sel1l3
						NM_021421	Angel2
						NM_010273	Gdi1
						NM_028523	Dcbld2
						NM_027444	Bbx
						NM_020586	Herpud2
						NM_021512	Nup160
						NM_173866	Gpt2
						NM_177328	Grm7
						NM_010111	Efnb2
						NM_019749	Gabarap
						NM_001081227	Stum
						NM_018804	Syt11
						NM_013727	Azi2
						NM_001161818	Zfp639
						NM_001199296	Acly
						NM_172961	Abat
						NM_001007568	Zfp251
						NM_028707	Psd2
						NM_175199	Hspa12a
						NM_001042541	Akap1
						NM_026576	Etaa1
						NM_001039092	Tom1l2
						NM_139227	Atxn7
						NM_001146100	Hk1
						NM_001286758	Tiam2
						NM_015751	Abce1
						NM_001168273	Sec24c
						NM_178914	Spata7
						NM_001199048	Zfp942
						NM_138950	Wdr81
						NM_007839	Dhx15
						NM_001122767	2310022A10Rik
						NM_019972	Sort1
						NM_146084	Fam13b
						NM_033604	Rnf111
						NM_028386	Asphd2
						NM_176999	Atp10b
						NM_001190414	Gne
						NM_054046	Def8
						NM_001164412	Cnot4
						NM_175226	Rnf139
						NM_021530	Slc4a8
						NM_011500	Strn
						NM_001076789	Cbx5
						NM_009963	Cry2
						NM_180974	Foxn2
						NM_021356	Gab1
						NM_029570	Atp11b
						NM_023434	Tox4
						NM_177806	Prpf39
						NM_153319	Amot
						NM_025793	Wdr45b
						NM_177664	Plppr4
						NM_199200	Fam171a2
						NM_001277217	Bmpr1b
						NM_053145	Pcdhb20
						NM_207663	Synm
						NM_138677	Edem1
						NM_133755	Tubgcp2
						NM_023794	Etv5
						NM_153563	Strip1
						NM_001289514	Tbc1d1
						NM_001033394	Tmem88b
						NM_015800	Crim1
						NM_025888	Kctd20
						NM_201369	N4bp2l2
						NM_015729	Acox1
						NM_019521	Gas6
						NM_028719	Cpne4
						NM_011947	Map3k3
						NM_001290370	Nmt2
						NM_177469	Adgra1
						NM_011295	Rps12
						NM_007760	Crat
						NM_133947	Numa1
						NM_145430	Fam222b
						NM_001199003	Rgs7
						NM_020575	March7
						NM_001163485	Rpl30
						NM_028999	Ppp6r3
						NM_001253752	Zmym5
						NM_010918	Nktr
						NM_007937	Epha5
						NM_001285893	Vps8
						NM_011809	Ets2
						NM_001122765	Sirt2
						NM_001038695	Kdm3a
						NM_001081319	Ric1
						NM_030678	Gys1
						NM_174868	Fam73a
						NM_022328	Mllt1
						NM_001159648	Cntn1
						NM_172555	Papolg
						NM_001039581	Abca3
						NM_008942	Npepps
						NM_001009575	Armcx5
						NM_172692	Gba2
						NM_025841	Kdelr2
						NM_026876	Trmt1l
						NM_001114098	Mtcl1
						NM_007922	Elk1
						NM_001164099	Add3
						NM_011884	Rngtt
						NM_173870	Mgat4a
						NM_010097	Sparcl1
						NM_001163395	Evl
						NM_007434	Akt2
						NM_001159850	Kcnk2
						NM_001033318	Cog7
						NM_001024142	Fbxo10
						NM_008166	Grid1
						NM_175101	Emc3
						NM_023472	Ankra2
						NM_009537	Yy1
						NM_001033238	Cblb
						NM_026162	Plxdc2
						NM_001045528	Fkbp15
						NM_019982	Sez6l
						NM_007913	Egr1
						NM_008467	Kpna4
						NM_172565	Klhl11
						NM_001123382	Il1r1
						NM_001145967	Atg4c
						NM_030729	Nckipsd
						NM_145148	Frmd4b
						NM_028459	Wasl
						NM_001033346	Lrrc55
						NM_011755	Zfp35
						NM_054078	Baz2a
						NM_021371	Caln1
						NM_001081466	Gtf2ird1
						NM_023585	Ube2v2
						NM_001160400	Megf8
						NM_029238	Slc35f4
						NM_030557	Mynn
						NM_008976	Ptpn14

## Sheet: Granule Cell CLIP
RefSeq Transcript	Gene Symbol	Start Codon	Stop Codon	Transcript Length	WT TRAP rpkm	CLIP Score replicate 1	CLIP Score replicate 2	CLIP Score replicate 3	Mean CLIP Score
NM_019688	Rapgef4	72	3054	4152	87.1759	6.83588	7.30784	6.58783	6.91052
NM_031186	Ndst3	156	2778	5423	34.4225	6.36224	6.8573	6.38033	6.53329
NM_001081153	Unc13c	0	6633	8081	61.0674	6.57644	7.04886	6.15559	6.59363
NM_001039000	Kif5a	467	3551	6311	218.812	5.94363	6.04756	5.7818	5.92433
NM_027727	Dym	264	2274	2471	21.3324	5.47224	6.37405	5.67239	5.83956
NM_008449	Kif5c	348	3219	6840	344.238	5.59423	5.81856	5.49015	5.63431
NM_029870	Crebrf	311	2234	7455	10.1269	5.16477	5.79576	5.24581	5.40212
NM_001081255	Lrch3	42	2379	5918	5.99837	4.64668	5.48349	4.84908	4.99308
NM_001110315	Kif1a	171	5241	8243	113.149	4.77907	5.08656	4.67939	4.84834
NM_001110796	Pclo	304	14896	16895	41.0368	4.62861	5.03139	4.87065	4.84355
NM_001163640	Chn2	175	1582	3150	428.88	4.75437	4.9853	4.67137	4.80368
NM_172406	Trak2	444	3186	6240	34.2788	4.70581	5.29552	4.24989	4.75041
NM_001081678	Zfp800	180	2169	3895	8.18101	3.93146	5.03526	4.55585	4.50752
NM_001114612	Stxbp5l	157	3643	11992	30.8106	4.19911	4.82146	4.42376	4.48145
NM_133829	Mfsd6	347	2732	4770	27.6475	4.13762	4.76129	4.36949	4.4228
NM_008960	Pten	868	2080	8212	42.3672	4.56239	4.70323	4.32449	4.53003
NM_001290995	Kif1b	374	5825	10274	167.062	4.40917	4.75573	4.24952	4.47147
NM_181347	Dennd1b	251	2327	8072	3.42396	3.96033	5.58045	4.14981	4.56353
NM_009706	Arhgap5	171	4683	5197	68.4406	4.22712	4.61019	4.33	4.3891
NM_029036	S100pbp	230	1421	1546	9.29328	4.17525	5.14893	4.01262	4.4456
NM_172853	Cdh7	363	2721	4269	31.9734	4.20551	4.34599	4.3004	4.28397
NM_011049	Cdk16	387	1878	3112	103.351	3.88554	4.78331	4.14149	4.27012
NM_021356	Gab1	876	2964	4859	3.18733	3.78414	5.32456	3.83215	4.31362
NM_008634	Map1b	115	7510	11852	104.84	4.1851	4.49416	4.13655	4.27194
NM_001018042	Sp3	190	2542	4178	45.064	3.99298	4.6101	4.18674	4.26327
NM_007462	Apc	311	8840	12449	24.1805	4.11175	4.58045	4.07836	4.25686
NM_001081045	Kansl1	650	3761	5510	24.4342	3.82078	4.64229	4.22316	4.22874
NM_001122738	Kansl1l	251	3122	4655	3.95947	3.71688	4.91224	4.05956	4.22956
NM_001099628	Atad2b	356	4739	8102	4.48999	3.76007	4.56187	4.22637	4.18277
NM_001004176	Maml3	863	4271	6514	10.5822	3.99735	4.44449	4.05334	4.16506
NM_001290745	Nckap1	217	3622	4405	154.111	4.05069	4.40041	4.04786	4.16632
NM_010901	Nfatc3	288	3519	6014	3.50984	3.57185	4.69353	4.21835	4.16124
NM_194340	Prr14l	305	6221	10546	20.8463	3.74959	4.66733	4.03939	4.1521
NM_001166649	Zfp280c	194	2396	4044	2.43253	3.853	4.66528	3.8638	4.12736
NM_001130169	Zfp207	176	1664	2362	26.6877	3.63733	4.39568	4.19018	4.0744
NM_001168505	Shoc2	324	2073	4075	19.3368	3.69018	4.64114	3.97663	4.10265
NM_008963	Ptgds	76	646	806	65.4778	3.97266	4.43443	3.71315	4.04008
NM_177751	Cnksr2	357	3456	5504	47.3063	3.58468	4.43906	4.0272	4.01698
NM_172827	Lnpep	77	3155	5181	83.0181	3.84482	4.15615	3.85427	3.95175
NM_178655	Ank2	267	3420	5770	68.2605	3.73351	4.27903	3.7768	3.92978
NM_013507	Eif4g2	332	3053	7760	110.861	3.99953	4.01227	3.57054	3.86078
NM_009622	Adcy1	111	3468	12259	498.144	3.69452	4.13667	3.72692	3.8527
NM_030133	Srbd1	55	3001	3530	2.38839	3.95194	4.12396	3.40216	3.82602
NM_011767	Zfr	60	3285	4596	65.0853	3.63913	4.12729	3.75248	3.83963
NM_146224	Zfp280d	183	3108	4372	16.0472	3.63368	4.32718	3.64558	3.86882
NM_008448	Kif5b	417	3309	6030	64.746	3.88664	3.8552	3.62769	3.78984
NM_176846	Exph5	63	5946	9601	60.1275	3.35592	4.05514	3.85521	3.75542
NM_028940	Clvs1	325	1390	3604	30.589	3.48076	3.98228	3.78509	3.74938
NM_144920	Plekha5	66	3876	5133	8.73494	3.48038	4.08623	3.7614	3.776
NM_001081154	Marf1	190	5401	7765	34.3691	3.53872	3.98225	3.75577	3.75891
NM_001001152	Zfp458	32	2291	3488	2.33012	3.5983	4.09243	3.50431	3.73168
NM_001111268	Grik2	413	3140	4785	55.3131	3.62082	4.38593	3.36969	3.79214
NM_008746	Ntrk3	55	2533	2978	57.0544	3.70909	4.1537	3.31556	3.72612
NM_009481	Usp9x	394	8059	11903	55.4202	3.43756	4.01583	3.76244	3.73861
NM_033565	Aff4	367	3850	10165	58.6472	3.53173	4.04502	3.70272	3.75982
NM_001160222	Pum2	55	3013	5876	62.3991	3.50271	4.07362	3.58002	3.71878
NM_029935	Chst15	560	2246	4265	22.1362	3.25525	4.06864	3.72763	3.68384
NM_010897	Nf1	108	8634	11847	39.0621	3.54968	3.92582	3.54178	3.67243
NM_133769	Cyfip2	155	3917	6368	201.108	3.66015	3.79399	3.52596	3.66003
NM_181316	Bbs9	352	2995	3382	4.6739	3.53745	4.24806	3.26691	3.68414
NM_007923	Elk4	345	1638	3671	6.46513	3.48163	4.54425	3.15644	3.72744
NM_172405	Fam175a	18	1242	2499	2.04851	2.89968	4.18042	3.91162	3.66391
NM_001128180	Dlgap1	78	2127	5306	54.4314	3.69096	4.10704	3.13946	3.64582
NM_026856	Zfp644	316	4195	5690	31.5783	3.47849	4.05098	3.47308	3.66752
NM_026361	Pkp4	284	3857	4614	66.6075	3.55413	3.85495	3.45553	3.62154
NM_001008506	Zc3h14	155	1970	3163	19.3813	3.35797	3.91879	3.60634	3.6277
NM_028291	Pan3	0	2514	4628	34.7171	3.25751	3.89937	3.53039	3.56242
NM_011749	Zfp148	487	2872	9431	22.8757	3.2897	3.72201	3.57715	3.52962
NM_001033150	Plekhm2	195	3297	4133	33.6453	3.24327	3.81274	3.50866	3.52155
NM_021889	Syt9	213	1689	3816	30.3057	3.541	3.58357	3.4352	3.51993
NM_175836	Sptbn1	46	7138	8239	30.1766	3.3377	3.89238	3.39561	3.54189
NM_001128084	Arhgap21	311	6179	6972	27.546	3.42001	3.94584	3.29161	3.55249
NM_009441	Ttc3	134	6074	7295	278.535	3.52069	3.67235	3.32404	3.50569
NM_008687	Nfib	1019	2282	8903	34.4903	3.22669	3.86781	3.38602	3.49351
NM_001081251	Pbrm1	311	5426	8117	9.1569	3.4706	4.05597	2.96767	3.49808
NM_011785	Akt3	46	1486	4735	32.15	3.58434	3.58084	3.23814	3.46777
NM_175229	Srrm2	258	8082	8598	62.1237	3.17816	3.61971	3.52103	3.43964
NM_011949	Mapk1	245	1322	5099	72.3232	3.40165	3.59733	3.34075	3.44658
NM_010432	Hipk1	283	3916	8049	79.2448	3.18324	3.69206	3.37238	3.41589
NM_001190401	Usp34	79	10828	12200	31.9722	3.21252	3.77058	3.27068	3.41792
NM_021494	Dennd5a	240	4104	4956	143.094	3.31658	3.71765	3.25775	3.43066
NM_001199137	Macf1	171	16158	17414	16.2057	3.25979	3.79049	3.23571	3.42866
NM_001024624	Cdkl5	258	3075	3246	28.36	3.08906	3.75737	3.38565	3.41069
NM_010434	Hipk3	544	4123	7497	55.8649	3.20674	3.65637	3.29353	3.38555
NM_010585	Itpr1	350	8600	9877	139.581	3.52927	3.44204	3.26054	3.41061
NM_001025572	Ankrd12	214	6340	8991	13.9453	3.12821	3.83847	3.18249	3.38306
NM_172587	Cdc14b	238	1696	5859	1.73002	3.83784	2.85331	3.31117	3.33411
NM_001282093	Wac	354	2160	5049	19.8501	3.21477	3.67098	3.19506	3.36027
NM_001185020	Wnk1	1023	7410	9811	19.3096	3.11512	3.63327	3.25569	3.33469
NM_013697	Ttr	189	633	1221	60.3912	3.19219	3.26237	3.47727	3.31061
NM_028906	Dpp8	287	2966	4764	82.8787	3.21713	3.65544	3.07305	3.31521
NM_170728	Ank3	514	5695	9320	28.4254	3.05347	3.73621	3.10386	3.29785
NM_146239	Cdk17	354	1926	3643	81.9358	3.10201	3.66355	3.0588	3.27479
NM_172679	4932438A13Rik	372	15390	15883	24.5776	3.07951	3.55211	3.1929	3.27484
NM_001128086	Anks1b	163	3931	7002	19.5452	2.98313	3.72623	3.10009	3.26982
NM_145599	Tmem184c	428	2297	2682	18.9665	3.28293	3.2625	3.25484	3.26676
NM_001025432	Crebbp	181	7507	7507	43.04	2.97933	3.60047	3.21708	3.26563
NM_001099641	Gabra6	304	1666	2489	751.83	3.115	3.30375	3.30758	3.24211
NM_145492	Zfp521	234	4170	6152	46.9937	3.02354	3.63145	3.10607	3.25369
NM_138659	Prpf8	315	7323	7481	58.8648	2.94608	3.51866	3.28014	3.2483
NM_178395	Zdhhc2	228	1329	2498	21.6659	3.06218	3.58448	3.09202	3.24623
NM_178005	Lrrtm2	428	1976	5673	14.9971	3.43616	3.63336	2.74283	3.27078
NM_001145959	Ndrg2	172	1246	2115	63.7858	2.9525	3.22099	3.45614	3.20988
NM_021523	Huwe1	453	13590	14624	39.1543	2.99809	3.56363	3.08841	3.21671
NM_001290643	Rp2	255	1299	1399	9.73926	3.06703	3.96342	2.63905	3.22317
NM_008982	Ptprj	60	4113	7634	60.8306	2.78642	3.36276	3.4222	3.19046
NM_001100452	Gltscr1l	422	3647	6579	17.342	3.06769	3.42467	3.07847	3.19028
NM_001109688	C2cd5	249	3222	4310	9.73189	3.10196	3.47348	2.93705	3.17083
NM_175143	Qrich1	175	2509	3238	53.2103	3.0792	3.44514	3.01554	3.17996
NM_011083	Pik3c2a	216	5277	8042	9.64018	2.91072	3.54939	3.09023	3.18345
NM_001100591	Rc3h2	239	3803	8967	31.0027	2.94501	3.52554	3.07408	3.18154
NM_026273	4930453N24Rik	76	1123	1331	11.5222	3.08782	3.39558	3.02145	3.16828
NM_001164572	Snrk	249	2496	4795	243.025	3.00101	3.56534	2.9336	3.16665
NM_030595	Nbea	466	9277	10983	51.95	3.16852	3.46345	2.86249	3.16482
NM_172430	Sphkap	189	5166	6512	322.505	2.92874	3.33467	3.24834	3.17058
NM_001029889	Usf3	299	6965	12606	13.5126	3.05726	3.51774	2.92553	3.16685
NM_010437	Hivep2	833	8126	9768	68.0937	2.85904	3.45531	3.11024	3.14153
NM_001252313	Ncor1	70	7435	8852	43.171	2.95954	3.38242	3.0984	3.14679
NM_011245	Rasgrf1	223	4012	4228	59.1308	2.95471	3.56893	2.90429	3.14264
NM_001290628	Vps54	360	3258	4533	9.05492	2.74882	3.73772	2.88704	3.12453
NM_011855	Tenm1	93	8289	8363	88.5753	2.93488	3.30221	3.18523	3.14077
NM_177368	Tmtc2	730	3241	5673	9.93556	2.66461	3.49724	3.16853	3.11013
NM_010864	Myo5a	427	5989	11684	83.6449	3.06009	3.29323	2.9696	3.10764
NM_029633	Clasp2	147	4008	5624	82.928	3.02657	3.25808	3.0652	3.11662
NM_018760	Slc4a4	66	3306	7492	46.3758	2.76251	3.63056	2.83133	3.0748
NM_178665	Lpp	550	2392	15649	2.60969	3.4597	3.43358	2.44256	3.11195
NM_172988	Fbxl4	319	2185	2546	7.72096	3.09125	3.06689	3.07533	3.07782
NM_023328	Agtpbp1	158	3815	4417	152.043	2.68527	3.5624	2.9582	3.06862
NM_001081299	Cdh18	371	2744	2744	75.5632	2.68581	3.57028	2.92735	3.06115
NM_027707	Nipbl	418	8815	10216	15.5661	2.69748	3.50789	2.96427	3.05655
NM_172771	Dmxl2	189	9354	10614	49.4917	2.93189	3.33283	2.90633	3.05702
NM_001003908	Cltc	203	5231	6144	73.76	2.51601	3.39093	3.21584	3.04093
NM_009295	Stxbp1	141	1926	3874	204.347	2.79682	3.28045	3.01972	3.03233
NM_175310	Pds5b	146	4487	7308	26.7895	3.03092	3.18076	2.91394	3.04187
NM_194051	Rtn4	32	3173	5558	31.9606	2.86762	3.43783	2.81035	3.0386
NM_001164503	Akap11	201	5886	9416	65.5696	2.75138	3.16376	3.15123	3.02212
NM_029166	Uhrf1bp1l	254	4628	6446	29.5885	2.83908	3.36665	2.88203	3.02925
NM_001289826	Clock	345	2913	9744	25.9409	2.74335	3.14141	3.11475	2.99984
NM_007561	Bmpr2	374	3491	11087	24.3905	2.57949	3.37439	3.08171	3.01187
NM_001029988	Fat2	11	13067	14423	369.371	2.87934	3.29041	2.86938	3.01304
NM_183208	Zmiz1	606	3825	7521	28.2577	2.95627	3.40377	2.7099	3.02331
NM_001285427	Cacnb4	497	1919	8088	83.5859	2.8784	3.2525	2.81624	2.98238
NM_013829	Plcb4	130	3658	3692	93.5093	2.94999	3.20837	2.79972	2.98603
NM_001081290	Prrc2c	286	8827	10444	14.5207	2.77382	3.30789	2.80478	2.96216
NM_001114386	Nedd4l	292	3223	8163	16.0259	2.97247	3.07066	2.85681	2.96665
NM_001252435	Dlg1	77	2795	4370	48.1902	2.76397	3.30131	2.80347	2.95625
NM_019933	Ptpn4	187	2968	4707	43.8274	2.98638	3.4726	2.41119	2.95672
NM_019445	Fmn2	221	4958	6442	3.07601	2.67588	3.42882	2.76743	2.95738
NM_172280	Emsy	135	3930	4026	11.951	2.67979	3.16852	2.94947	2.93259
NM_172887	Fry	339	9402	10730	34.1463	2.7546	3.41044	2.66099	2.94201
NM_001110253	Fyco1	214	4528	7702	4.90846	2.61158	3.52691	2.58017	2.90622
NM_001289521	Zeb2	189	3837	8898	1.478	2.7801	3.21736	2.7087	2.90205
NM_007567	Bsn	125	11954	15937	63.2581	2.56461	3.2993	2.8124	2.8921
NM_010239	Fth1	224	773	942	64.6809	3.38955	3.40634	1.93801	2.9113
NM_023045	Xpo7	99	3363	15118	11.3306	2.07797	3.47063	3.00984	2.85282
NM_138679	Ash1l	100	8977	11270	19.1778	2.68737	3.20343	2.66348	2.85143
NM_022656	Nisch	164	4946	5586	89.0032	2.52115	3.22547	2.78594	2.84419
NM_001033532	AW554918	12	1851	5351	3.21413	2.58432	3.46419	2.47437	2.84096
NM_010890	Nedd4	210	2874	5494	76.1327	2.4493	3.20715	2.84351	2.83332
NM_009572	Zhx1	697	3319	5105	27.8354	2.34279	3.20313	2.95581	2.83391
NM_001286263	Ralgapa1	749	6998	8403	33.583	2.60888	3.04837	2.81482	2.82402
NM_023662	Pcm1	224	6302	8381	22.0764	2.56591	3.18109	2.77	2.839
NM_177224	Chd9	371	8981	11517	15.0994	2.52393	3.43665	2.53885	2.83314
NM_134074	Dock9	119	6296	7760	45.3536	2.81664	3.07319	2.57536	2.82173
NM_153599	Cdk8	18	1413	2586	7.48492	2.90617	3.41362	2.22377	2.84785
NM_008839	Pik3ca	55	3262	8917	33.2843	2.66048	3.03753	2.75648	2.81816
NM_001113389	Dyrk1a	146	2438	5756	34.939	2.61373	3.07561	2.7166	2.80198
NM_026604	Fam135a	412	4933	6467	8.07585	2.37532	3.40488	2.67032	2.81684
NM_011240	Ranbp2	128	9290	9477	27.1538	2.44011	3.06332	2.86583	2.78976
NM_001256382	Rims2	77	4796	7404	41.3938	2.40899	3.41307	2.55639	2.79282
NM_001081383	Kmt2c	233	14948	16820	27.101	2.34257	2.99361	2.97484	2.77034
NM_172882	Wdfy3	545	11072	14277	54.3346	2.34123	3.05904	2.91456	2.77161
NM_133781	Cab39	418	1444	3800	84.4653	2.51358	2.96171	2.82641	2.76723
NM_001102430	Arfgef1	176	5717	7042	40.8132	2.55022	3.0157	2.78049	2.78214
NM_181058	Zbtb20	532	2539	2923	6.00472	2.3846	3.29492	2.65868	2.7794
NM_175514	Fam171b	21	2487	3394	53.3186	2.68386	3.01017	2.60056	2.76486
NM_030675	Krit1	321	2532	6105	5.69869	2.49551	2.54286	3.25024	2.76287
NM_012005	Med14	274	4588	5080	20.1412	2.74425	2.85009	2.74969	2.78134
NM_175187	Tmem161b	136	1600	2686	12.2944	2.56923	3.02182	2.69228	2.76111
NM_001252074	Nrxn3	917	2621	5146	81.2255	2.80275	2.95564	2.53256	2.76365
NM_001160256	Smg7	109	3526	5803	41.0531	2.48841	3.01629	2.78258	2.76243
NM_010431	Hif1a	423	2934	4761	63.3365	2.69933	3.14276	2.40906	2.75038
NM_001242558	Ncoa6	141	3375	3896	17.2469	3.06663	2.92171	2.30396	2.7641
NM_001081223	Rbbp8	442	3124	3618	1.78426	2.35693	2.88684	2.95426	2.73268
NM_175238	Rif1	43	7324	8502	69.3147	2.4432	2.87764	2.86849	2.72978
NM_001033962	Ube3a	563	3113	4910	44.8251	2.76376	2.7225	2.74545	2.7439
NM_001165989	Ckap5	37	6136	6577	30.7465	2.56435	3.10508	2.53737	2.7356
NM_001079686	Syne1	28	9061	10876	64.8593	2.63314	3.04302	2.4981	2.72475
NM_001081344	Stxbp5	357	3708	9074	20.0399	2.41096	3.14224	2.60252	2.71857
NM_001081371	Dmxl1	93	9135	12211	19.2924	2.42565	3.11457	2.59493	2.71172
NM_010881	Ncoa1	712	4930	7329	21.1733	2.33476	3.29068	2.54631	2.72392
NM_008540	Smad4	440	2096	3341	27.6347	2.64708	2.87079	2.62303	2.71363
NM_207255	Zfp532	405	3516	5503	20.9472	2.40121	3.18934	2.5393	2.70995
NM_026984	Kmt2e	469	6076	7258	35.7762	2.67809	3.0156	2.44858	2.71409
NM_008170	Grin2a	0	4395	4512	50.6762	2.66974	3.09337	2.38173	2.71495
NM_172714	Lin54	171	2421	4464	5.82515	2.558	2.93402	2.59912	2.69705
NM_172491	D130040H23Rik	571	1789	2002	2.69532	3.12154	2.82495	2.17233	2.70627
NM_173018	Myo9a	243	8139	11974	20.6674	2.49767	2.8701	2.74995	2.70591
NM_008632	Map2	447	1851	5427	75.1742	2.59776	2.85786	2.64175	2.69913
NM_001080977	Rsbn1l	37	2503	5554	9.21154	2.17892	3.00951	2.86473	2.68438
NM_144906	Sgip1	421	2842	5445	24.268	2.98629	2.67572	2.42457	2.69553
NM_175510	Unc80	0	9981	13533	49.0051	2.39913	2.92779	2.75347	2.69346
NM_173028	Vps13a	164	9665	11164	9.58626	2.49447	2.91814	2.64827	2.68696
NM_181421	Gm15800	253	13510	15482	55.7151	2.51997	2.9552	2.56714	2.68077
NM_177821	Ep300	415	7654	8749	24.0444	2.41109	3.15498	2.4837	2.68326
NM_001081360	Camsap2	667	5104	7823	82.2806	2.62025	3.02939	2.40065	2.68343
NM_009484	Uty	207	3846	5249	9.79533	2.378	3.32386	2.3703	2.69072
NM_139149	Fus	86	1643	1845	4.16888	2.36245	2.81561	2.82456	2.66754
NM_173868	St18	233	3371	5711	70.8536	2.65838	2.74837	2.58444	2.66373
NM_009048	Reps1	23	2411	2618	10.4117	2.50035	2.97637	2.5436	2.67344
NM_025408	Acer3	77	881	4058	3.42986	2.74298	2.97824	2.30788	2.67637
NM_029498	Zmym2	73	4204	6876	26.3369	2.57659	3.14617	2.30216	2.67497
NM_028487	Gpbp1	1329	2811	3624	59.4955	2.75678	3.07372	2.13946	2.65665
NM_024288	Rmnd5a	498	1674	6165	128.377	1.72867	3.15605	3.05467	2.64646
NM_001080931	Med13	0	6516	11787	32.6698	2.63127	2.87332	2.45517	2.65325
NM_001290485	Lamp2	157	1408	2190	23.2572	2.75227	2.38737	2.79206	2.6439
NM_172924	Peak1	452	5660	10982	11.0401	2.45349	2.84582	2.6252	2.6415
NM_001031814	Smg1	347	11324	15553	52.4132	2.43868	2.87816	2.59105	2.63596
NM_001291137	Ralgapb	281	4805	8414	34.4611	2.70833	2.61257	2.58759	2.63617
NM_177284	Nrxn1	1083	5571	9004	152.188	2.23734	3.0943	2.56192	2.63119
NM_001029934	Usp32	187	5002	6924	40.6242	2.39005	2.99645	2.55699	2.64783
NM_172994	Ppp2r2c	251	1595	4031	231.175	2.73378	2.65557	2.54919	2.64618
NM_001271798	Pcdh9	705	4317	6129	51.4458	2.4388	2.71573	2.77623	2.64358
NM_175023	Rbbp6	398	770	2272	24.1923	3.06571	3.45941	1.27065	2.59859
NM_177185	Ubn2	248	4193	14669	5.65096	1.85736	3.18943	2.80688	2.61789
NM_010905	Nfia	342	1872	9513	24.1291	2.34889	3.36848	2.23203	2.6498
NM_181517	Ipo7	0	3117	3117	55.4161	2.58225	2.52295	2.7824	2.6292
NM_001252520	Picalm	341	2309	4159	43.4987	2.61937	2.75048	2.52218	2.63067
NM_013720	Mga	186	9315	13931	18.2499	2.47492	3.01886	2.40434	2.6327
NM_001303033	Ubr3	49	5731	8081	31.9718	2.39754	3.12299	2.36344	2.62799
NM_001033634	Zyg11b	170	2405	10654	32.5311	2.19376	2.96036	2.67946	2.61119
NM_001033285	Cdc42bpa	21	5220	8656	62.1822	2.64315	2.78125	2.41827	2.61422
NM_153413	Dock3	401	6494	9063	41.9836	2.39799	2.96087	2.4672	2.60868
NM_007566	Birc6	173	14795	15768	27.9552	2.11741	2.97919	2.68333	2.59331
NM_027872	Slc46a3	346	1729	2421	5.42371	1.97665	3.18773	2.57771	2.5807
NM_001005868	Erbb2ip	398	4751	6664	4.03765	2.42	3.26567	2.0971	2.59426
NM_181324	Ddx6	331	1783	6033	51.9783	2.35208	2.71447	2.71409	2.59355
NM_011104	Prkce	808	3022	6254	89.2216	2.24892	3.02597	2.48426	2.58638
NM_133833	Dst	0	16140	17210	34.9014	2.30359	3.0571	2.40378	2.58815
NM_001040106	Aak1	536	3416	19345	28.3099	2.02836	2.88273	2.78009	2.56372
NM_001177667	Sptan1	229	7663	8018	119.99	2.22819	2.92836	2.55479	2.57045
NM_001159634	Prrc2b	198	6891	10686	49.269	2.33776	3.00404	2.4109	2.58424
NM_001130189	Sgce	116	1472	1704	13.2254	2.525	2.87854	2.34486	2.5828
NM_207215	Mycbp2	283	14524	15233	34.8363	2.50148	2.95765	2.28138	2.58017
NM_178078	Cnot1	303	7419	8375	39.2552	2.35466	2.93188	2.41472	2.56709
NM_009429	Tpt1	173	692	894	176.415	1.93019	2.92625	2.79143	2.54929
NM_001024857	Ttbk2	430	4162	11078	37.1495	2.70451	2.35082	2.59866	2.55133
NM_008904	Ppargc1a	139	2533	6464	5.4077	1.92359	3.224	2.4659	2.53783
NM_177353	Slc9a7	80	2261	2469	52.4179	2.03623	3.13765	2.43413	2.536
NM_199196	Suz12	214	2440	4373	29.2681	2.49752	2.4709	2.665	2.54447
NM_001286260	Nfat5	356	4034	4717	11.4796	2.4347	2.63779	2.53289	2.53513
NM_010754	Smad2	331	1735	8752	5.15659	2.56708	2.82681	2.26375	2.55254
NM_019921	Akap10	181	2170	3879	18.8492	2.28396	3.27804	2.08625	2.54942
NM_175234	Faxc	238	1468	9342	12.8207	2.4194	3.24586	1.91888	2.52805
NM_145223	Alms1	115	9871	9984	16.6062	2.03658	2.92486	2.58642	2.51595
NM_030238	Dync1h1	210	14145	14398	66.4124	2.28699	3.02662	2.29484	2.53615
NM_028296	Car10	936	1923	3336	81.9552	2.93937	2.62216	2.05206	2.53787
NM_080448	Srgap3	770	4070	8887	56.5036	2.30103	2.85919	2.42993	2.53005
NM_001033536	Rfx7	580	4960	8000	14.2429	2.16273	2.88136	2.51658	2.52022
NM_011273	Xpr1	210	2298	7651	10.8222	2.12572	3.17737	2.2551	2.5194
NM_001173506	Map1a	463	8794	11539	114.977	2.51364	2.86589	2.18154	2.52036
NM_030174	Mctp1	345	2430	4289	30.8442	2.50709	2.84058	2.22605	2.52457
NM_133975	Trip12	125	6203	9632	28.3272	2.77493	2.5638	2.16998	2.5029
NM_001035226	Xpo1	200	3416	4906	35.0232	2.37903	2.62191	2.52609	2.50901
NM_146241	Trhde	70	3148	5722	34.2655	2.49256	2.68124	2.37482	2.51621
NM_001002004	2610507B11Rik	96	6801	7443	42.299	2.29335	2.75411	2.44255	2.49667
NM_001134383	Iqsec1	257	3143	4526	43.176	2.25745	2.93504	2.29615	2.49621
NM_019427	Epb41l4b	3	1587	2966	8.11952	1.78595	3.22479	2.40763	2.47279
NM_181750	R3hdm1	427	3835	4812	10.8025	2.30442	3.02429	2.13433	2.48768
NM_177341	Trpm3	75	4089	5157	74.6794	2.55049	2.80155	2.13014	2.49406
NM_009530	Atrx	253	7684	10244	17.9405	2.12895	2.82974	2.50137	2.48669
NM_010956	Ogdh	123	3195	6615	57.591	2.28971	2.56677	2.57263	2.47637
NM_001034115	Shank1	76	6580	7596	8.76015	2.06986	3.0539	2.29483	2.47286
NM_030168	Rictor	22	5149	9314	16.2113	2.19703	2.86866	2.39382	2.48651
NM_010472	Agfg1	263	1943	7886	7.36105	2.11645	3.15626	2.11739	2.46337
NM_019973	Son	84	6465	7286	87.2392	2.22866	2.74138	2.42699	2.46568
NM_175191	Gpr22	1332	2742	4587	59.9687	2.59304	2.53275	2.27377	2.46652
NM_134071	Slf1	116	3281	3742	6.02587	2.46251	2.89181	1.99945	2.45126
NM_007470	Apod	355	925	2074	6.81908	2.13211	2.85844	2.39988	2.46348
NM_201245	Mprip	331	3445	8718	35.4801	2.01645	2.90793	2.40626	2.44355
NM_008569	Anapc1	267	6102	8967	21.4368	2.00079	2.81448	2.52017	2.44515
NM_001301628	Usp15	104	2963	11462	15.0278	1.4955	2.9732	2.77852	2.41574
NM_009029	Rb1	150	2916	4625	6.15178	2.23074	2.64653	2.42962	2.43563
NM_001290656	Mbd5	194	4691	5301	12.5339	2.14624	2.90962	2.27134	2.4424
NM_207221	Jmjd1c	0	7593	8382	37.6765	2.3827	2.80108	2.18233	2.45537
NM_008516	Lrrn1	770	2921	3756	48.1275	2.2225	2.90273	2.1924	2.43921
NM_001145919	Ythdf3	314	2072	5131	17.3019	2.59067	2.32955	2.3972	2.43914
NM_013881	Ulk2	516	3630	5813	27.4254	2.34779	2.48251	2.48902	2.43978
NM_001162917	Dennd4a	473	6083	8655	19.1681	2.01343	2.87723	2.39985	2.43017
NM_198105	Fam120c	27	3303	7709	11.7418	2.19097	2.86541	2.25775	2.43805
NM_001172098	Strn3	211	2350	3912	43.0161	2.03951	2.88416	2.31543	2.41303
NM_145400	Ube4a	252	3339	6061	12.3338	2.31434	2.65127	2.31455	2.42672
NM_030110	Micu3	0	1572	3268	60.7919	1.81212	2.49824	2.89734	2.40256
NM_001267796	Igip	1082	1244	1378	43.9798	1.35813	3.04832	2.70334	2.36993
NM_001099298	Scn2a1	51	6072	8690	294.484	2.28794	2.59424	2.39862	2.42693
NM_008729	Ctnnd2	534	4275	5947	31.2801	2.18223	2.82763	2.21572	2.40853
NM_010498	Ids	182	1841	4973	30.0939	2.20623	2.77968	2.23323	2.40638
NM_145969	Dennd6a	85	1765	2684	7.21579	2.86415	2.51023	1.80719	2.39386
NM_026833	Wash1	109	1537	2904	12.3957	0.485252	3.76023	2.53073	2.25874
NM_026799	Drosha	276	4398	4567	27.1519	2.23402	2.59902	2.3475	2.39351
NM_001081017	Unc79	695	8486	8870	11.9443	1.72039	2.85108	2.54531	2.37226
NM_001033322	Gucy1a2	454	2647	13727	6.26792	1.64867	2.77664	2.67551	2.36694
NM_144515	Zfp52	454	2629	3164	6.01066	2.26809	2.65224	2.24257	2.38763
NM_001128606	Epb41	215	2630	5141	58.393	2.06238	2.59084	2.41122	2.35481
NM_011264	Rev3l	315	9684	10666	14.6102	2.16395	2.58231	2.35573	2.36733
NM_001159960	Pde1c	421	2317	8728	20.526	2.21968	2.61861	2.26566	2.36798
NM_010771	Matr3	316	2857	4472	94.6715	2.29578	2.27973	2.50341	2.35964
NM_144788	Hectd1	356	8189	8988	32.6137	2.0322	2.56976	2.413	2.33832
NM_010748	Lyst	181	11545	11806	22.0426	1.90163	2.61865	2.4904	2.33689
NM_001001187	Zfp738	74	2456	4504	4.36712	2.18346	2.4769	2.40623	2.35553
NM_001024952	Rc3h1	439	3832	11011	12.1636	1.74937	2.81612	2.44012	2.3352
NM_001127363	Inpp5a	281	1520	2826	31.0203	2.4184	2.33983	2.2955	2.35124
NM_001252060	Cacna1a	281	7265	7778	81.8487	2.14817	2.66907	2.24187	2.35304
NM_001081109	Lmtk2	238	4654	8114	46.1631	1.81128	2.86291	2.36559	2.34659
NM_001277986	Snap91	219	2910	4330	77.6772	1.85565	2.83443	2.3444	2.34483
NM_001099637	Cep170	166	4903	6930	32.8067	1.93149	2.81714	2.25377	2.33413
NM_001039546	Myo6	221	4010	7868	5.75365	2.15379	2.66221	2.15935	2.32512
NM_010193	Fem1b	343	2227	6496	79.3843	2.20074	2.62771	2.13814	2.3222
NM_054040	Tulp4	757	5401	9696	55.7649	2.17031	2.92737	1.83785	2.31184
NM_019740	Foxo3	325	2344	2889	78.2294	1.86779	2.82496	2.26931	2.32068
NM_009454	Ube2e3	387	1011	1539	126.025	2.30498	3.04385	1.55355	2.30079
NM_008224	Hcfc1	354	6492	8138	25.156	1.90717	2.75223	2.26937	2.30959
NM_001164585	Dnajc6	289	2992	5218	97.3624	1.86959	2.64185	2.39776	2.30307
NM_176962	Zfp944	508	1987	2784	4.86434	2.52342	2.16157	2.22299	2.30266
NM_001286729	Glcci1	175	1228	5525	23.1066	1.8117	2.93562	2.11846	2.28859
NM_001081011	Srgap2	718	3934	8040	30.1675	2.33743	2.48433	2.11638	2.31271
NM_008846	Pip5k1b	150	1770	2527	22.9153	2.08778	2.81257	1.98729	2.29588
NM_139304	Gatad2b	9	1794	1912	14.2139	2.20508	2.77914	1.9059	2.29671
NM_008739	Nsd1	111	8187	12784	40.9154	2.40131	2.52172	1.94755	2.29019
NM_028059	Zfp654	107	1823	4745	13.1603	1.92493	2.5965	2.33	2.28381
NM_177192	Dennd5b	371	4196	9833	25.6546	2.04125	2.55565	2.26636	2.28775
NM_001159516	Qk	488	1448	5438	13.0156	2.61682	2.14616	2.07491	2.2793
NM_172298	Tshz3	132	3378	5002	6.51708	2.14938	2.5075	2.23883	2.29857
NM_026647	Zdhhc21	362	1160	8751	8.50714	1.94259	2.55136	2.36931	2.28775
NM_181039	Adgrl1	919	5320	8188	84.825	1.99545	2.81234	2.05568	2.28783
NM_207667	Fgf14	410	1169	3224	58.0103	2.15081	2.81039	1.89732	2.28617
NM_010414	Htt	167	9530	13219	28.5456	2.18097	2.56347	2.10468	2.28304
NM_016716	Cul3	379	2686	4919	48.6137	2.22711	2.61077	1.98238	2.27342
NM_177327	Wwp1	283	3040	6458	12.6207	2.40093	2.8286	1.57104	2.26686
NM_019697	Kcnd2	190	2083	4546	176.625	2.19196	2.42361	2.24579	2.28712
NM_178678	Lrrtm3	542	2291	3852	72.9824	1.97479	2.28706	2.51726	2.2597
NM_001289662	2810474O19Rik	582	5148	6062	8.51838	1.94897	2.545	2.31149	2.26849
NM_001112739	Kcnc1	1210	2968	4336	100.35	2.05889	2.71679	2.0006	2.25876
NM_198111	Akap6	94	7018	10263	22.3043	2.0342	2.78119	1.9582	2.25786
NM_008467	Kpna4	292	1858	3726	26.327	2.53142	2.16731	2.05409	2.25094
NM_152234	Ubqln1	217	1882	3602	81.567	2.30783	2.50827	1.97853	2.26488
NM_001163574	Tjp1	408	5466	6874	2.63891	1.07888	2.96906	2.56368	2.20387
NM_080465	Kcnn2	0	1725	2046	5.64217	1.85898	2.8433	2.08369	2.26199
NM_009628	Adnp	544	3871	4953	39.4085	2.01128	2.5143	2.24904	2.25821
NM_009409	Top2b	473	5312	5633	70.3203	2.31322	2.29147	2.15111	2.25193
NM_172663	Epc2	320	2747	4358	29.554	1.91505	2.67428	2.14753	2.24562
NM_029525	Prex2	328	5125	11054	8.47691	2.21481	2.45143	2.10566	2.2573
NM_008712	Nos1	378	4668	9695	17.3974	2.08493	2.60528	2.06628	2.25216
NM_001113373	Shank2	400	4819	6359	7.31308	1.9471	2.741	2.04791	2.24534
NM_172739	Arhgap35	713	5213	8393	43.4246	2.02854	2.3196	2.37438	2.24084
NM_010687	Large	1157	3428	4654	20.0005	1.78063	2.55794	2.35759	2.23205
NM_010243	Fut9	510	1590	11990	39.6032	1.67762	2.4383	2.53053	2.21548
NM_001170746	Magi2	243	4071	6736	3.96891	1.89846	2.71016	2.05816	2.22226
NM_001278075	Farsb	55	1825	2091	18.6346	1.83039	2.57112	2.26128	2.22093
NM_198033	Setx	683	8624	10970	34.6967	1.99985	2.54891	2.11831	2.22236
NM_001014973	Snx13	208	3085	6226	26.9552	2.11517	2.30309	2.25585	2.2247
NM_011743	Zfp106	176	5843	9099	47.5877	1.85957	2.75126	2.03094	2.21392
NM_175251	Arid2	173	5660	9029	16.1709	1.98499	2.5855	2.05122	2.20724
NM_001081340	Setd2	82	7696	8350	27.6475	2.09796	2.67772	1.83684	2.20417
NM_011766	Zfpm2	502	3958	4974	26.9624	2.56418	2.74099	1.23908	2.18142
NM_021287	Sptbn2	444	7611	8235	29.8526	2.05371	2.50497	2.06881	2.20916
NM_028966	Samd4	626	2498	6856	5.37485	1.28171	2.38486	2.82433	2.16363
NM_027118	Cdk13	446	4802	6901	18.5308	1.53414	2.71844	2.30411	2.18556
NM_198619	Zfp933	95	1502	4247	5.82588	1.65027	2.74451	2.18889	2.19455
NM_177151	Vps13b	260	12242	13371	10.3807	1.99313	2.53173	2.08085	2.20191
NM_001081286	Fat1	6	13779	14627	99.7121	2.249	2.48228	1.84922	2.1935
NM_008855	Prkcb	220	2242	8830	113.691	1.66428	2.69695	2.20338	2.1882
NM_153163	Cadps2	284	4199	4969	322.501	2.08237	2.38881	2.10633	2.1925
NM_001291044	Nudt6	26	968	1083	1.04523	2.41751	2.35118	1.77834	2.18235
NM_009072	Rock2	212	4379	8012	92.2412	2.13222	1.94145	2.40713	2.16027
NM_001294143	Hipk2	373	3883	4178	6.31978	1.77302	2.83996	1.90964	2.1742
NM_177215	Ocrl	197	2900	5184	10.0463	1.26284	2.71893	2.44999	2.14392
NM_018814	Pcnx	342	7377	12139	21.2707	1.76833	2.64418	2.10518	2.17256
NM_177324	Sbf2	159	5778	7163	13.3039	2.01517	2.44523	2.09778	2.18606
NM_172473	Hace1	246	2976	3785	11.4743	2.32892	2.39004	1.8339	2.18429
NM_172803	Dock4	305	6242	8072	40.7174	2.24837	2.57511	1.66848	2.16399
NM_009826	Rb1cc1	450	5217	7046	48.7447	2.06756	2.25903	2.20122	2.17594
NM_001110783	Ank1	300	6024	8267	139.725	2.14714	2.37735	2.02337	2.18262
NM_172646	Dnm3	211	2791	4590	32.9981	1.84148	2.21114	2.42334	2.15865
NM_207302	Zranb1	0	2127	2127	87.6953	2.31605	2.23133	1.95185	2.16641
NM_023868	Ryr2	499	15400	16813	23.7109	1.82582	2.67206	1.99193	2.16327
NM_001160319	Ubr4	28	15571	15873	28.2207	1.96717	2.56386	1.94498	2.15867
NM_011416	Smarca2	110	4862	5813	52.2897	1.84987	2.37136	2.29185	2.17102
NM_028410	Prkrir	27	2304	3463	15.3758	2.11111	2.28672	2.09343	2.16375
NM_011916	Xrn1	109	5281	10278	2.84662	1.64334	2.79845	2.054	2.16526
NM_001003672	Pcdhac2	0	3021	5422	14.7084	1.42756	2.50803	2.49591	2.14383
NM_028015	Cers5	136	1381	2010	16.2418	1.53755	2.56026	2.34722	2.14834
NM_001290503	Zer1	414	2715	4218	32.4627	1.78094	2.71492	1.92822	2.14136
NM_001081049	Kmt2a	0	11892	16439	7.53757	1.72501	2.61998	2.08735	2.14411
NM_001164367	Rab11fip2	218	1331	5363	11.4274	1.30364	3.08143	1.93811	2.10773
NM_001045515	Synj1	145	4075	7012	47.5523	1.7156	2.38205	2.35461	2.15075
NM_007840	Ddx5	178	2026	3520	209.963	2.13354	2.04521	2.24153	2.1401
NM_173440	Nrip1	723	4209	4529	28.2955	2.21256	2.18013	2.03776	2.14348
NM_001163154	Etv1	31	1345	3791	134.885	1.31957	2.69323	2.34613	2.11964
NM_011062	Pdpk1	134	1814	7160	50.6279	2.07783	2.55217	1.74863	2.12621
NM_007968	Ewsr1	67	2035	2412	19.5547	1.65145	2.63478	2.07994	2.12206
NM_001081458	Ppp2r5c	120	1479	2368	16.2864	1.82471	2.20969	2.33469	2.12303
NM_001006664	Epb41l1	487	3127	6523	115.787	2.01971	2.40839	1.94874	2.12561
NM_134063	Fam208b	560	7709	8338	9.30191	1.81866	2.56276	1.96085	2.11409
NM_170598	Rbm12	251	3230	3720	11.2884	2.41342	2.27472	1.62448	2.10421
NM_018733	Scn1a	187	6184	8287	69.9589	1.9854	2.30058	2.06142	2.1158
NM_023565	Cse1l	92	3008	3604	35.5336	1.69538	2.45424	2.20317	2.1176
NM_207209	Sec24b	239	3995	4702	12.4188	1.67401	2.44955	2.23397	2.11918
NM_001123327	Qser1	206	5303	8975	4.25659	2.39524	2.32568	1.60394	2.10829
NM_001165988	Ubap2l	101	3053	3627	10.3868	0.947827	2.99396	2.23911	2.0603
NM_001033550	Lrrc8b	315	2727	2841	11.4928	1.76975	2.43838	2.09909	2.10241
NM_023472	Ankra2	497	1436	1921	10.5896	1.17487	3.02247	2.00577	2.06771
NM_176850	Bptf	0	8766	11488	26.7139	1.8688	2.447	1.99363	2.10314
NM_001204229	Clec16a	224	3329	6238	16.0226	1.88938	2.55875	1.84412	2.09742
NM_146150	Nrd1	28	3514	4155	21.6006	1.89854	2.42815	1.96709	2.09793
NM_175162	Stox2	338	2744	9316	16.8186	1.30523	2.71836	2.18356	2.06905
NM_028356	Zbtb25	128	1448	1675	3.83283	1.23091	2.19086	2.6972	2.03966
NM_001003918	Usp7	57	3369	5427	42.9861	1.87478	2.21202	2.13573	2.07418
NM_008173	Nr3c1	13	2392	6329	37.267	2.09461	2.0869	2.03995	2.07382
NM_001081288	Taf2	223	3820	5033	15.2125	1.98076	2.56244	1.66244	2.06855
NM_001168304	Cdk19	286	1792	5807	55.8567	1.82006	2.26144	2.15341	2.0783
NM_031179	Sf3b1	112	4027	6192	28.984	1.89467	2.24763	2.09064	2.07765
NM_172674	Phf20	183	3216	5733	22.803	2.39212	1.98501	1.80163	2.05959
NM_007772	Hivep1	173	8240	8753	8.86327	1.90485	2.22279	2.09508	2.07424
NM_022022	Ube4b	726	4248	5508	24.3939	1.48118	2.7612	1.92964	2.05734
NM_019498	Olfm1	261	1719	2727	270.558	1.96455	2.20152	2.00905	2.05837
NM_011630	Nr2c2	404	2195	7620	24.312	1.2107	2.38146	2.52392	2.03869
NM_007842	Dhx9	150	4302	4613	18.8805	1.38177	2.4823	2.2936	2.05256
NM_001081149	Kat6a	494	6506	9126	47.1495	1.72157	2.43322	2.03358	2.06279
NM_183300	Zfyve9	49	2170	2170	79.7432	2.08181	1.98108	2.05765	2.04018
NM_009782	Cacna1e	1	6823	12697	58.3728	1.78678	2.54878	1.82249	2.05268
NM_021899	Foxj2	801	2499	5013	15.5582	1.84998	2.60615	1.66179	2.03931
NM_008817	Peg3	362	5078	6624	28.028	2.02269	1.97979	2.10485	2.03578
NM_009384	Tiam1	503	5279	7290	139.797	1.87587	2.4308	1.84177	2.04948
NM_198003	Zfp946	494	2066	2917	3.48312	2.44542	2.29042	1.33149	2.02244
NM_019663	Pias1	8	1964	3855	10.7902	1.52109	2.36662	2.25795	2.04856
NM_009938	Copa	381	4056	4629	40.0583	1.71211	2.46325	1.95504	2.04347
NM_172385	Zfp536	341	4250	4411	16.6548	1.98885	2.50099	1.6204	2.03675
NM_001159964	Eps15	130	1882	4234	48.482	1.67805	2.05262	2.32654	2.01907
NM_011323	Scn8a	54	5991	11241	62.2705	2.01954	2.21186	1.84742	2.02628
NM_021495	Nectin3	193	1843	3070	11.9676	1.29571	2.86676	1.85751	2.00666
NM_175375	Ankhd1	135	7782	8231	16.2275	1.61972	2.60505	1.84447	2.02308
NM_025757	Gid4	511	1165	4400	13.4268	1.56885	2.67972	1.803	2.01719
NM_175749	Nup153	376	4765	6021	24.0295	1.3833	2.55535	2.10642	2.01502
NM_001004761	Gpr158	689	4292	7143	120.437	1.98425	1.91922	2.11674	2.00674
NM_013675	Sptb	667	7657	10394	60.6843	1.77586	2.5646	1.66769	2.00271
NM_001111291	Caprin1	178	2257	3536	42.444	1.69545	1.97454	2.31544	1.99514
NM_001290788	Aqr	173	4376	4414	8.33139	1.94919	2.43099	1.64759	2.00926
NM_001002005	Panx2	348	2382	3412	14.81	1.99456	2.56407	1.4303	1.99631
NM_011162	Mapk8ip1	137	2261	2934	75.3784	1.52513	2.70466	1.78916	2.00632
NM_022997	Vps35	40	2431	3169	43.5823	1.64939	2.71499	1.63248	1.99896
NM_001271809	Pcdh11x	369	4362	8637	1.1842	2.2666	2.71003	0.943168	1.97327
NM_133907	Ube3c	273	3525	5033	35.3867	1.23542	2.36469	2.37842	1.99284
NM_001013806	Ankrd13c	61	1687	2654	18.3912	1.30782	2.56006	2.11133	1.99307
NM_015806	Mapk6	772	2935	4205	73.0185	1.86965	2.5652	1.54061	1.99182
NM_198625	Mtss1l	246	2394	4718	77.6507	1.90796	2.14675	1.91302	1.98924
NM_001081034	Fbxo11	33	2826	4013	34.5247	2.08119	2.55714	1.32293	1.98709
NM_027293	Dopey2	187	7075	7316	24.8711	1.84009	2.28136	1.87655	1.99934
NM_008597	Mgp	75	390	599	1.60159	2.18306	3.97645	-3.37233	0.92906
NM_001285813	Dtna	380	2438	6376	24.8829	2.31965	1.80977	1.78623	1.97188
NM_001005424	Gm996	202	3127	4684	22.481	1.63266	2.5826	1.73106	1.98211
NM_001081068	Ltn1	139	5443	7737	11.3679	1.75427	2.14152	2.05113	1.9823
NM_001112721	Ubr5	429	8808	9773	25.0209	1.72409	2.43141	1.80183	1.98578
NM_145452	Rasa1	579	3696	5101	24.0362	2.00241	2.11304	1.79264	1.96936
NM_011889	Sept3	148	1162	4731	173.355	1.6738	2.65489	1.57244	1.96704
NM_008717	Zfp638	339	6120	6368	25.4507	2.13935	2.2611	1.5308	1.97708
NM_008580	Map3k5	80	4223	5393	25.8923	1.96687	2.4526	1.50829	1.97592
NM_007399	Adam10	223	2473	4608	38.5601	2.02542	2.70707	1.10031	1.94427
NM_023146	Ranbp17	127	3394	5002	3.33303	0.998739	2.61157	2.20892	1.93974
NM_198007	Ascc3	271	6868	7477	4.93838	1.6476	2.05871	2.1862	1.96417
NM_009573	Zic1	782	2126	3350	184.011	1.44165	2.33974	2.13087	1.97075
NM_001134791	Osbpl9	115	1996	3109	26.1033	1.68663	2.35204	1.8878	1.97549
NM_054093	Ube3b	481	3694	5191	24.6129	2.1158	1.95659	1.79382	1.9554
NM_001009947	Dock11	99	6321	6665	2.04487	2.20694	1.89239	1.74746	1.94893
NM_028007	Itfg1	211	2044	3355	122.371	1.62873	1.97133	2.2642	1.95476
NM_011056	Pde4d	180	2424	7049	16.015	1.28016	2.41461	2.16853	1.95443
NM_001205332	Map4	186	3447	5556	79.9649	1.70486	2.34392	1.82776	1.95885
NM_178723	Zfp385b	460	1909	3212	20.867	2.29915	1.95629	1.56587	1.94044
NM_001290535	Ogt	68	3179	5200	23.2634	1.52529	2.25732	2.08766	1.95676
NM_008678	Ncoa2	222	4611	8267	28.9186	1.86851	2.33325	1.64956	1.95044
NM_001161854	Csde1	548	2852	4105	83.6179	1.70554	2.6085	1.4953	1.93645
NM_177592	Tmem164	429	1320	5300	10.9011	1.97192	2.71679	1.06442	1.91771
NM_177819	Fam135b	189	4401	4623	32.2078	1.28491	2.305	2.24504	1.94498
NM_001034964	Sorbs1	43	2266	5275	12.1895	1.27081	1.97733	2.48704	1.91173
NM_017478	Copg2	97	2713	4016	35.4091	1.63151	2.42367	1.81755	1.95757
NM_144910	Cnot6l	64	1717	8564	13.2448	1.46087	2.69877	1.64323	1.93429
NM_177608	Secisbp2l	248	3518	6797	31.7613	1.89865	2.29362	1.61846	1.93691
NM_007788	Csnk2a1	261	1437	4205	47.7001	1.45457	2.25126	2.11767	1.94117
NM_027341	Dzip3	392	3389	5153	13.8709	1.35517	2.36056	2.11127	1.94233
NM_178363	Ylpm1	169	6589	7034	6.40971	1.78739	2.40509	1.6432	1.94523
NM_001083967	Tcf4	239	2240	7135	34.0176	1.67717	2.42971	1.73027	1.94572
NM_001024955	Pik3r1	342	1707	5826	33.2469	2.24133	1.96246	1.53004	1.91128
NM_177184	Vps13c	31	11278	11523	20.4235	1.60806	2.47325	1.7001	1.92714
NM_177077	Exoc6b	108	2541	5440	17.8157	2.02364	2.49886	1.2007	1.90773
NM_172707	Ppp1cb	386	1370	4024	117.193	1.39749	2.35373	2.02664	1.92596
NM_001036684	Atp2b2	439	4036	6905	305.615	1.84124	2.1072	1.80907	1.91917
NM_011982	Homer1	803	1364	2136	21.9976	1.93927	1.70606	2.05582	1.90038
NM_001290815	Ablim1	317	2282	6242	60.6146	1.28531	2.462	1.97306	1.90679
NM_145436	Cdc27	231	2709	5783	9.97322	2.02959	1.39839	2.14357	1.85718
NM_001025431	Btbd3	320	1706	4638	277.801	1.66082	2.47375	1.58115	1.90524
NM_145155	Wasf3	431	1937	2685	18.8096	1.76888	1.38305	2.40134	1.85109
NM_001033422	Thoc2	30	4815	7619	11.6122	1.65037	2.11581	1.92415	1.89678
NM_153396	Mical3	294	2889	2929	14.8337	1.94184	2.29651	1.45646	1.89827
NM_173444	Nbeal1	328	8395	12108	3.94811	1.41081	2.51949	1.75633	1.89554
NM_001033430	Kdm7a	139	2962	9553	33.1789	1.84619	2.167	1.68455	1.89924
NM_001033713	Mef2a	336	1833	5538	40.2731	2.10443	2.2667	1.28408	1.88507
NM_028319	Zfp518a	521	4958	6840	5.59193	1.50081	2.23614	1.94835	1.8951
NM_198702	Adgrl3	513	5145	5812	20.9809	1.56305	2.33507	1.80363	1.90059
NM_001081982	Nfix	314	1640	5626	58.5014	1.17143	2.33259	2.16545	1.88982
NM_007907	Eef2	96	2673	3100	359.906	1.84898	2.0958	1.7231	1.88929
NM_001025429	Spag9	160	3667	6913	100.736	1.64549	2.18962	1.8094	1.8815
NM_138667	Tab2	409	2491	4278	6.55349	2.15904	2.26322	1.13927	1.85384
NM_033581	Pcdhgc3	138	2943	4687	52.6822	1.23441	2.3615	2.02752	1.87448
NM_026375	Ahctf1	670	7402	8831	18.8054	1.39295	2.1925	2.02252	1.86932
NM_173066	Ep400	261	9261	10690	28.062	1.4767	2.188	1.94437	1.86969
NM_001001983	Pi4ka	78	6213	6431	74.001	1.7175	2.18635	1.69857	1.86748
NM_177784	Klhl23	274	1951	4617	41.0716	2.02316	1.83639	1.69369	1.85108
NM_026055	Rpl39	95	251	434	123.953	2.85447	0.84516	1.56331	1.75431
NM_172836	9930021J03Rik	135	6420	8026	8.56533	1.91566	2.24756	1.44674	1.86998
NM_001114140	Tcf20	185	6149	7354	23.4327	1.81695	2.50275	1.28651	1.86874
NM_001290545	Aftph	283	3079	4046	137.547	1.67907	2.15302	1.76461	1.86557
NM_001081293	Rprd2	202	4612	8419	18.0176	1.5315	2.08331	1.96405	1.85962
NM_019724	Mmp16	263	2087	4600	5.61239	1.55893	2.39426	1.64372	1.86564
NM_019588	Plce1	62	6911	9514	2.83471	1.755	2.33326	1.49929	1.86252
NM_177038	Trappc8	11	4325	5178	25.8837	1.71605	1.93052	1.9047	1.85042
NM_025819	Swt1	184	2908	3668	5.10122	1.76871	1.59752	2.12127	1.82917
NM_001253905	Ncor2	370	7132	8146	9.56277	1.60395	2.17903	1.76183	1.84827
NM_001033472	A830080D01Rik	204	2463	3366	1.19317	2.30672	1.32529	1.76052	1.79751
NM_001163635	Tnks2	306	3807	6481	61.9678	1.73974	2.129	1.6529	1.84055
NM_007379	Abca2	96	7398	8061	94.3556	1.75653	2.13894	1.63455	1.84334
NM_020508	Brd4	265	4468	5948	8.7379	1.85314	2.17265	1.54157	1.85579
NM_177261	Kndc1	491	5720	7302	51.8277	1.87193	2.21467	1.43558	1.84073
NM_033524	Spred1	654	1989	6319	33.7699	1.26499	2.23593	2.03834	1.84642
NM_008306	Ndst1	154	2803	6085	11.4167	1.86051	2.06237	1.58076	1.83454
NM_001025259	Mbp	117	504	1985	28.4207	0.336954	2.81238	2.11886	1.75607
NM_145484	Zfp758	323	1979	2974	7.94203	2.3858	1.92125	1.09347	1.80017
NM_153556	Pms1	163	2917	3064	6.62214	1.46036	2.55917	1.46655	1.82869
NM_145941	Eif4g1	184	4987	5439	32.3852	1.63309	2.14719	1.69392	1.82473
NM_172495	Ncoa7	341	3173	5107	41.7506	1.34585	2.45684	1.66507	1.82259
NM_001081203	Sbno1	68	4244	10071	52.7466	1.70145	2.10025	1.64532	1.81567
NM_001037877	Tcf25	162	2043	3062	214.194	1.87487	2.10765	1.45703	1.81318
NM_175537	Zbtb38	484	4078	4091	25.9051	1.75665	2.28963	1.41763	1.8213
NM_001085355	Arid1b	21	6756	11325	14.1715	1.44848	2.19597	1.8332	1.82588
NM_145617	Herc1	198	14778	15229	40.6435	1.63669	2.3265	1.53091	1.83137
NM_001081152	Npat	105	4368	7347	7.60862	1.90723	2.46945	1.01756	1.79808
NM_144825	Taok1	698	3704	12409	45.6058	1.51711	2.18021	1.74122	1.81285
NM_001111026	Runx1t1	400	2155	7324	5.43602	1.63176	2.55308	1.23271	1.80585
NM_001113517	Arhgef7	147	2496	4929	57.1234	1.35931	2.10806	1.91393	1.79377
NM_019490	Uso1	160	3040	3898	21.1203	1.50809	2.03545	1.85727	1.80027
NM_001243047	Dlg2	299	1304	5933	46.1467	1.86902	2.04694	1.45695	1.79097
NM_175513	Zfp804a	133	3736	4184	2.98576	1.65373	2.37826	1.39545	1.80915
NM_198438	Ssbp3	387	1473	3114	31.6431	0.790487	2.10204	2.37442	1.75565
NM_020027	Prrc2a	206	6683	6868	33.2357	1.50966	2.02438	1.84452	1.79286
NM_033327	Zfp423	360	4239	4907	5.86151	1.94946	2.09691	1.3072	1.78452
NM_172493	Diaph2	234	3543	8442	1.59687	1.79168	2.51139	1.03838	1.78048
NM_175466	Zfp770	137	2255	4263	11.4402	0.959753	2.48687	1.90229	1.78297
NM_029709	Clasp1	748	5131	7599	10.7876	1.35721	2.04407	1.94207	1.78112
NM_211355	Smek1	832	3295	4555	17.1093	1.94029	1.85033	1.55474	1.78179
NM_175353	Exoc6	47	2462	2737	14.675	1.8587	2.18481	1.32549	1.78967
NM_008913	Ppp3ca	778	2344	4846	217.332	1.74812	1.70776	1.85973	1.77187
NM_025483	Senp7	135	3249	4908	8.55907	0.782354	2.5091	1.98638	1.75928
NM_001163126	Cog5	21	2511	2997	14.3157	1.48001	2.24989	1.64387	1.79125
NM_001080819	Arid1a	0	6852	8175	16.9043	1.27803	2.4498	1.63592	1.78791
NM_177805	Fam179b	235	5566	6434	15.9374	1.50837	2.12636	1.71952	1.78475
NM_029654	Atg2b	411	6639	10173	18.561	1.36543	1.9286	2.03355	1.77586
NM_153178	Ago2	165	2748	8031	25.1873	1.57025	1.91768	1.84358	1.77717
NM_010282	Ggps1	219	1122	2371	26.9222	2.14374	1.88819	1.25026	1.76073
NM_001081114	Clip3	149	1793	3300	156.572	1.41852	1.96834	1.93518	1.77401
NM_008032	Aff2	461	4280	4486	1.56196	1.18175	2.59457	1.52265	1.76633
NM_001024602	Cep170b	236	4961	6640	58.8065	1.72771	1.90037	1.66619	1.76476
NM_148945	Rps6ka3	338	2561	7320	16.1653	1.92612	1.72696	1.62911	1.76073
NM_175255	Sec24a	661	3934	6798	3.64131	0.685411	2.38799	2.15424	1.74255
NM_001081224	Prr16	33	948	2224	3.4295	2.23453	2.62181	0.12137	1.65924
NM_001253752	Zmym5	225	2109	5290	11.9641	1.97901	1.93865	1.34442	1.75402
NM_173776	Maml2	278	1523	4452	5.71069	1.51557	2.43145	1.37711	1.77471
NM_134013	Psme4	208	5740	6442	24.7451	1.38151	2.15235	1.75525	1.76304
NM_138755	Phf21a	414	2085	6328	9.91003	1.11605	2.52352	1.62831	1.75596
NM_194341	Synrg	45	3462	7112	23.7016	1.61436	1.92543	1.7272	1.75566
NM_007459	Ap2a2	180	2997	4639	172.863	1.54518	2.03967	1.68497	1.75661
NM_011250	Rbl2	119	3527	4925	19.733	1.4824	1.75869	2.0023	1.7478
NM_001193305	Mical2	335	3644	3680	65.5678	1.37566	1.98107	1.88868	1.74847
NM_172779	Ddx26b	367	2953	3808	3.89534	1.83698	1.49968	1.8695	1.73539
NM_001007573	Maneal	4	1363	2727	21.5437	1.25899	2.38172	1.63961	1.76011
NM_013880	Plcl2	61	3448	4051	39.0639	1.73647	1.96172	1.55704	1.75174
NM_178404	Zc3h6	403	3937	4916	9.79741	1.62658	1.89781	1.72436	1.74958
NM_001081362	Trrap	117	11661	12476	10.2536	1.15733	2.52039	1.57478	1.75083
NM_011159	Prkdc	23	12410	12674	2.35673	0.999605	2.46398	1.75306	1.73888
NM_013865	Ndrg3	158	1286	2644	416.073	1.15544	2.18218	1.90372	1.74711
NM_172513	Fam126b	250	1843	8695	36.3073	1.62314	1.74956	1.84035	1.73769
NM_001033276	Kmt2d	229	16996	19827	15.0973	1.44999	2.26487	1.54569	1.75352
NM_001128096	Atp13a3	279	4029	7310	20.3586	1.48809	2.26343	1.49805	1.74986
NM_001290428	Frmpd4	321	4164	8156	6.15751	1.54935	2.49342	1.16614	1.73631
NM_001103166	Pcbp2	245	1241	2775	30.3469	0.93782	1.89143	2.30144	1.71023
NM_194462	Akap9	257	11597	12105	23.877	1.48858	1.94977	1.75778	1.73204
NM_001162884	Igsf10	568	8353	10084	2.24674	1.69541	2.05544	1.45123	1.73402
NM_001161362	Ppp2r3a	611	4064	6918	4.63282	1.7415	2.41746	1.02845	1.72914
NM_152809	Csnk1g3	734	2009	4394	24.2806	1.70166	1.45753	1.95082	1.70334
NM_001025392	Bclaf1	250	3010	5454	42.9145	1.45066	1.88053	1.84955	1.72691
NM_021465	Stag2	230	3926	5826	46.2743	1.3424	2.08837	1.74648	1.72575
NM_001077707	Shprh	195	5220	6950	28.8979	1.43662	1.84702	1.9022	1.72861
NM_001159591	Csnk1g2	316	1564	2259	24.8044	1.5284	1.79648	1.83164	1.71884
NM_139294	Braf	168	2583	9728	23.1675	0.975336	2.40777	1.76739	1.71683
NM_028136	Dhx36	49	3055	4975	28.8695	1.89464	1.98228	1.23967	1.70553
NM_173758	Vwa8	106	3223	3486	7.71969	0.836559	2.28099	1.96325	1.6936
NM_026164	Pnpla8	237	2568	4406	49.9461	1.44272	1.85582	1.84051	1.71302
NM_001013385	Grm4	368	2867	3205	323.117	1.14404	2.41128	1.61269	1.72267
NM_146193	Btbd1	40	1507	3001	11.9161	1.69003	1.71723	1.70771	1.70499
NM_008914	Ppp3cb	133	1711	3831	83.1343	1.73114	1.85345	1.54726	1.71062
NM_175356	Pi4kb	383	2789	3786	26.5334	1.3227	1.94323	1.84498	1.70363
NM_001093776	Myt1l	818	4376	7104	18.4558	1.17619	2.18477	1.75713	1.70603
NM_001033263	Agap2	715	4276	5634	53.2411	1.25641	2.27341	1.59214	1.70732
NM_010733	Lrrn3	842	2966	3491	16.1689	1.5063	2.44462	1.16419	1.70504
NM_001165902	Ctnnb1	87	2433	3423	108.825	1.53756	1.92596	1.63618	1.6999
NM_001253857	Tet1	0	6120	14082	6.49099	1.84964	1.92539	1.32632	1.70045
NM_015744	Enpp2	185	2774	3239	35.6437	1.86531	1.64585	1.56559	1.69225
NM_028887	Smchd1	179	6203	7053	13.3454	1.53869	1.80224	1.73251	1.69115
NM_010889	Neb	419	21878	22489	2.12981	1.36572	2.16075	1.57785	1.70144
NM_011682	Utrn	89	10382	12382	4.65158	1.7079	2.06149	1.30831	1.69257
NM_173368	Chd6	121	8257	10579	12.6143	1.7381	1.90925	1.41222	1.68653
NM_146019	Chd3	35	6203	7281	26.3795	1.6681	2.068	1.33823	1.69145
NM_009261	Strbp	167	2186	16348	31.1423	1.81135	2.25731	1.00376	1.69081
NM_001163471	Hectd2	145	2473	4764	3.6317	1.17836	1.93782	1.91035	1.67551
NM_001081302	Trio	352	9664	11497	32.8203	1.37119	2.04674	1.63534	1.68442
NM_011086	Pikfyve	158	6317	11255	13.7907	1.86343	1.55255	1.59634	1.67077
NM_011789	Apc2	18	6843	9074	26.2068	1.66648	2.00259	1.3837	1.68426
NM_080633	Aco2	50	2393	2768	170.715	1.81772	1.85791	1.37317	1.68293
NM_029277	Arhgap12	409	2851	4959	8.50353	1.32921	2.42346	1.34092	1.69786
NM_027435	Atad2	108	4203	5683	1.77861	1.88559	1.97349	1.15293	1.67067
NM_027626	Psd3	189	1320	9210	72.2994	2.09421	2.24403	0.607399	1.64855
NM_010894	Neurod1	97	1171	2494	150.331	0.96718	2.49113	1.57333	1.67721
NM_011643	Trpc1	471	2901	4574	10.29	1.40353	1.74735	1.87328	1.67472
NM_029665	Ipo11	162	3090	4282	10.9111	1.10301	1.89286	2.01042	1.66876
NM_001093750	Ptchd1	17	2684	6489	25.641	1.41493	1.90174	1.71653	1.67773
NM_030563	N4bp1	239	2921	6469	14.9735	1.69657	1.69852	1.60981	1.6683
NM_178778	Scai	88	1909	10705	9.01077	1.89126	2.46126	0.560244	1.63759
NM_001081055	Trappc10	140	3917	5048	44.4518	1.56409	1.74614	1.6982	1.66948
NM_010513	Igf1r	602	4712	11978	11.0939	0.604834	2.55039	1.78706	1.64743
NM_138952	Ripk2	102	1722	1901	1.18941	0.980752	2.07006	1.92014	1.65698
NM_001081225	Fam178a	192	3684	6880	10.6751	1.49808	1.90667	1.60868	1.67114
NM_026231	Gstcd	182	2087	2620	3.74598	1.45097	1.966	1.59646	1.67114
NM_172865	Manea	94	1483	4628	10.9208	1.59344	2.51564	0.837842	1.64897
NM_001177982	Pde4b	104	1559	3482	34.8035	0.902179	2.14876	1.89643	1.64912
NM_001033258	Arfgef3	133	6646	8216	55.5599	1.32924	2.03766	1.62891	1.66527
NM_019967	Brinp1	434	2717	3354	110.911	1.21297	2.1753	1.61537	1.66788
NM_007971	Ezh2	144	2385	2652	1.6944	1.64393	1.78723	1.56576	1.66564
NM_009172	Siah1a	192	1041	2114	22.8084	0.322012	2.74776	1.6998	1.58986
NM_027491	Rragd	465	1665	5047	72.6955	1.00583	2.33562	1.63423	1.65856
NM_028370	Pot1b	195	2118	3499	1.38179	1.65264	1.72538	1.58458	1.6542
NM_024452	Luzp1	397	3604	7529	56.9744	1.86573	1.48	1.56583	1.63719
NM_018798	Ubqln2	222	2139	3331	47.4661	1.45269	2.01898	1.50871	1.66013
NM_001243712	Itch	405	3000	5389	25.4197	1.65173	1.86196	1.43918	1.65096
NM_001198571	Abi2	184	1627	5875	32.6579	1.68536	1.96101	1.30838	1.65158
NM_146145	Jak1	316	3778	5299	36.611	1.68321	1.80872	1.45256	1.64817
NM_029409	Mff	344	1220	1894	88.9151	1.86596	0.741367	2.0767	1.56134
NM_146121	Rabgap1	222	3417	4967	35.2139	1.34603	2.00635	1.59124	1.64787
NM_001044371	Rad17	174	2241	2721	10.9697	1.43257	1.93924	1.58365	1.65182
NM_001287165	Nup98	177	3690	4064	11.5193	1.44843	1.70177	1.78973	1.64664
NM_177208	Dopey1	250	7639	9124	15.3329	1.05823	1.92149	1.92734	1.63569
NM_024473	BC005537	1724	2414	2551	25.7036	1.55682	2.04335	1.34371	1.64796
NM_001289743	Lrrc4c	1010	2933	3644	8.15866	2.15565	2.07515	0.540052	1.59028
NM_001163024	Mon2	543	5691	9300	18.6891	1.07705	1.93585	1.87976	1.63089
NM_028945	Fam208a	222	4719	7577	21.6902	1.33628	2.14971	1.43972	1.6419
NM_001025373	Zfp943	302	1826	2734	7.41146	2.54288	1.19289	0.93205	1.55594
NM_010418	Herc2	169	14680	15348	40.5368	1.32642	2.07567	1.51421	1.63876
NM_001252189	Epn2	288	2040	4209	44.3609	1.7259	1.77771	1.3788	1.62747
NM_001243123	Fam193a	273	4830	5541	8.96696	0.86004	2.43652	1.56169	1.61942
NM_144937	Usp3	241	1804	5578	23.9091	0.738074	2.17372	1.90707	1.60629
NM_001302958	Ttll7	397	2227	2265	46.8266	1.73346	1.83176	1.28414	1.61645
NM_172655	Hecw2	94	979	1132	10.9643	1.65663	1.72278	1.4858	1.62174
NM_054050	Rapgef1	283	3544	5837	31.1438	1.02012	2.13751	1.69057	1.61607
NM_001003909	Ankib1	611	3869	6626	10.1577	0.987473	1.83968	1.97244	1.59986
NM_008957	Ptch1	0	4305	4305	20.4494	1.6825	2.22853	0.924347	1.61179
NM_025481	Smurf2	483	2730	5331	10.7768	0.643596	2.38973	1.73666	1.58999
NM_027448	Lca5	361	2476	4235	1.54571	2.03992	1.25227	1.38134	1.55784
NM_026252	Cpeb4	1348	3538	7641	42.835	1.52236	1.93307	1.37702	1.61082
NM_178164	Ptbp3	268	1840	6855	2.4182	1.64196	2.5273	0.546136	1.5718
NM_001114399	Zmym4	69	4719	7010	15.0557	1.55178	1.63801	1.60622	1.59867
NM_011385	Ski	15	2199	5465	102.092	1.32155	1.74872	1.72806	1.59944
NM_172546	Cnksr3	554	2222	3448	33.3364	1.14331	2.18607	1.50227	1.61055
NM_009744	Bcl6	88	2212	3285	26.2322	0.73109	2.13049	1.87955	1.58038
NM_001290636	Dock7	153	6540	7139	4.36616	1.30118	2.08803	1.42396	1.60439
NM_178065	Arel1	632	3104	5434	35.114	1.35513	2.23248	1.22608	1.60456
NM_177111	Ccdc66	28	2836	2951	4.95809	1.00326	2.15714	1.60877	1.58972
NM_181595	Ppp1r9a	350	3638	9547	9.59362	1.42006	2.01555	1.37134	1.60231
NM_011669	Usp12	294	1407	4274	16.6976	1.90673	1.89663	0.907671	1.57034
NM_175489	Osbpl8	459	3129	7152	36.6478	1.66151	1.39696	1.64231	1.56693
NM_001168292	R3hdm2	220	3355	4030	32.7552	1.14933	2.23823	1.40963	1.59906
NM_026484	Ccny	479	1505	4017	19.715	0.127322	2.49118	1.92738	1.51529
NM_029851	Dync2h1	89	13010	13972	3.24758	0.692013	2.32924	1.69118	1.57081
NM_001079830	Trim33	586	3958	8819	21.884	1.44199	1.70685	1.60884	1.58589
NM_001097644	Ccnyl1	46	922	2927	1.96736	1.59669	1.63037	1.51111	1.57939
NM_010154	Erbb4	303	4182	12037	5.07934	1.39857	2.09035	1.26592	1.58495
NM_027629	Pgm2l1	317	2183	8626	72.8324	1.46744	1.468	1.7552	1.56354
NM_009282	Stag1	247	4024	6010	18.9098	1.17646	1.89438	1.65666	1.57583
NM_146003	Senp6	621	4020	4938	27.8178	1.73736	1.79593	1.1667	1.56666
NM_001037846	Cnot2	154	1777	2816	36.693	1.59053	2.38564	0.707687	1.56129
NM_001005510	Syne2	209	20834	21718	3.45753	1.29026	1.83629	1.59938	1.57531
NM_027994	Cand1	347	4040	8209	29.5878	1.23081	2.0173	1.48466	1.57759
NM_009558	Zfp51	111	2457	2578	2.89701	1.96706	1.18034	1.44723	1.53154
NM_001025074	Ntrk2	661	3127	8744	50.7272	1.4406	1.86886	1.42823	1.57923
NM_172768	Gramd1b	94	2731	2814	75.266	1.68775	1.89709	1.09941	1.56142
NM_001110275	Itsn1	261	3903	5364	32.1484	1.49568	1.49805	1.67002	1.55458
NM_008756	Ocln	179	1745	3192	19.6162	0.841903	2.35832	1.49021	1.56348
NM_009231	Sos1	530	4490	8919	11.1973	1.48355	1.82748	1.39914	1.57006
NM_173185	Csnk1g1	420	1800	7183	7.3011	1.23472	1.53847	1.89142	1.55487
NM_001276465	Vps13d	161	13331	15846	15.9233	1.46711	1.82216	1.41527	1.56818
NM_001014981	Wdr7	238	4708	7109	32.7872	1.25367	1.9122	1.54932	1.57173
NM_001077354	C77370	588	5136	10891	2.92414	1.59197	1.58183	1.48672	1.55351
NM_008991	Abcd3	97	2077	3399	16.6954	1.59032	1.06567	1.88406	1.51335
NM_001195003	Kat7	197	2033	5966	17.1787	0.946922	1.81904	1.86929	1.54509
NM_001205095	Gm4944	178	2164	4880	1.98977	1.73166	1.17912	1.64551	1.51876
NM_197987	Trim37	399	3285	5637	131	1.37013	1.99213	1.32133	1.56119
NM_027518	Gpr137c	276	1548	2444	25.5602	1.6774	1.93009	1.04954	1.55234
NM_001190376	Camta2	284	3896	4632	71.2405	1.20456	1.91944	1.56537	1.56313
NM_001081132	Upf2	103	3913	5174	12.0213	1.58848	1.55699	1.49554	1.54701
NM_053099	Setbp1	369	5118	9955	12.9673	1.04927	1.87448	1.71811	1.54729
NM_178651	Slc30a9	140	1844	3410	64.9471	1.33825	2.02488	1.30155	1.55489
NM_172486	Zfp677	329	2234	2912	1.33791	1.26855	1.75989	1.61713	1.54853
NM_001252453	Ptprs	236	4742	5641	99.6731	1.4416	1.87592	1.36288	1.56013
NM_001045524	Cep126	84	3396	3647	4.34597	0.836072	1.93414	1.82664	1.53228
NM_001290760	Tbc1d9b	79	3871	5249	49.439	0.74621	2.14229	1.7101	1.53287
NM_146087	Csnk1a1	169	1147	2013	101.46	0.899002	2.23375	1.49224	1.54166
NM_025943	Dzip1	678	3237	4900	2.94224	1.64069	1.938	1.04971	1.5428
NM_026201	Ccar1	202	3643	4478	12.6671	0.427149	1.99191	2.08566	1.50157
NM_145563	Zfp932	101	1682	2075	8.08189	0.568792	1.97678	1.99806	1.51455
NM_001081079	Ogfrl1	124	1519	4844	44.8272	1.94209	1.98863	0.58591	1.50554
NM_145434	Nr1d1	629	2477	2765	21.3926	1.93484	2.41931	0.0304068	1.46152
NM_028705	Herc3	101	3254	4731	51.0821	0.316762	2.03771	2.1052	1.48656
NM_001080748	Gtf2i	383	3260	4337	44.7667	1.28554	1.85594	1.481	1.54083
NM_011931	Rfwd2	112	2314	5056	19.9972	1.60285	1.8541	1.13916	1.53204
NM_001285991	Tbc1d5	350	2864	5682	2.75956	1.70081	1.7642	1.11301	1.526
NM_021361	Nova1	24	1548	7000	19.3101	1.56767	2.08582	0.953718	1.53574
NM_008070	Gabrb2	427	1852	7552	145.688	1.96843	1.24937	1.27693	1.49824
NM_001290770	Tro	66	6330	7153	14.8437	1.31398	1.4804	1.76967	1.52135
NM_138682	Lrrc4	133	2092	3622	46.9098	1.18677	2.2517	1.18482	1.5411
NM_011845	Mid2	24	2082	5916	7.87042	1.20267	2.37258	1.04829	1.54118
NM_172409	Fmnl2	275	3527	5851	7.89958	1.65607	1.95111	0.970991	1.52605
NM_030235	Avl9	217	2167	6691	16.2404	1.3053	1.42756	1.81542	1.5161
NM_027060	Btbd9	169	2008	6857	11.8293	0.882486	2.13289	1.55589	1.52375
NM_009239	Sp4	207	2556	9017	23.3657	1.64815	1.71639	1.21739	1.52731
NM_007497	Atf1	230	1040	2329	4.59134	1.25324	2.19322	1.1256	1.52402
NM_030708	Zfhx4	420	11166	13874	1.16001	1.17139	2.41547	1.01248	1.53312
NM_001033375	A230046K03Rik	101	3623	5858	21.0864	1.21863	2.0832	1.27838	1.52674
NM_011251	Rbm6	238	3595	3718	9.18866	0.63572	2.19416	1.6663	1.49873
NM_001080932	Foxk2	144	2100	5032	22.3834	0.935428	2.11533	1.50679	1.51918
NM_153078	Ehbp1	397	4018	4974	11.7851	1.58511	1.83592	1.11114	1.51072
NM_134034	Smek2	399	2862	5108	21.2569	1.40834	2.21844	0.941627	1.5228
NM_001082485	Zfp266	473	2288	6285	15.1782	1.76717	2.12752	0.580204	1.49163
NM_001282943	Ccne2	130	1345	3026	6.81584	0.455477	2.08876	1.8932	1.47914
NM_028816	Xpo6	507	3882	4453	21.0847	0.958248	1.68908	1.87045	1.50593
NM_026908	Cab39l	285	1299	3037	10.4784	0.484735	1.5559	2.31615	1.45226
NM_008973	Ptn	1470	1977	2021	6.26813	1.7615	0.0821093	2.20338	1.34899
NM_172703	Eif4g3	477	5214	6139	28.9571	1.4682	2.05457	1.01786	1.51355
NM_172858	Pak7	480	2640	4773	8.86142	1.29139	1.22581	1.90874	1.47531
NM_178755	Agbl2	155	2744	3462	4.99977	0.530934	2.04646	1.8585	1.47863
NM_001290741	Cnot6	2	1676	5372	19.0681	0.760951	2.33708	1.41066	1.5029
NM_001161431	Slitrk2	280	2821	7778	8.08181	1.6212	1.59179	1.31351	1.50883
NM_001081499	Tbc1d8b	185	3530	5907	1.75737	1.53184	1.77064	1.22946	1.51065
NM_177855	Med12l	24	6582	10249	11.6617	1.48879	1.89278	1.14498	1.50885
NM_199446	Phkb	159	3417	4617	10.4427	1.50308	1.92481	1.09367	1.50719
NM_177296	Tnpo3	122	2894	3971	31.4179	1.44243	1.87025	1.21937	1.51068
NM_172579	Sipa1l1	401	5750	7492	11.6261	1.27747	2.06322	1.17773	1.50614
NM_177798	Frs2	355	1882	5684	11.4832	1.42973	2.09845	0.993575	1.50725
NM_011546	Zeb1	50	3404	5806	10.4816	1.08067	1.82987	1.59015	1.50023
NM_146073	Zdhhc14	847	2317	3115	14.4588	0.775548	1.58872	2.05042	1.47157
NM_144851	Senp1	331	2254	6400	3.46299	2.15778	1.54399	0.629101	1.44362
NM_023363	Zfp788	396	2895	3833	14.2213	1.47837	1.57091	1.42016	1.48981
NM_019827	Gsk3b	1525	2788	8298	31.0948	1.16703	1.97356	1.35952	1.50004
NM_177124	Tnrc6b	190	5515	17125	14.123	1.32356	1.88997	1.27141	1.49498
NM_001163351	Ntng1	1095	2190	2190	9.67545	2.00176	2.01135	0.252178	1.42176
NM_001042743	Mast2	266	5669	5724	17.6469	1.31384	1.9272	1.23969	1.49358
NM_033560	Vps37a	326	1520	6379	11.1041	1.21775	1.2825	1.85365	1.4513
NM_133648	Slc12a6	0	3300	5956	31.5863	1.88845	1.53929	0.964683	1.46414
NM_027144	Arhgef12	508	5143	10483	46.8524	1.52994	1.62818	1.28704	1.48172
NM_001145807	Brinp3	104	2405	2760	11.6844	1.9443	1.74355	0.654834	1.44756
NM_173876	Clcn3	178	2554	5250	80.7493	0.856823	1.77941	1.74446	1.46023
NM_010593	Jup	163	2401	5009	31.3106	1.45343	1.53964	1.43699	1.47669
NM_028148	Scaf11	263	4634	7724	27.782	1.3752	1.68008	1.38956	1.48161
NM_007864	Dlg4	315	2490	3327	90.9858	1.30708	1.99937	1.11372	1.47339
NM_172671	Lgr4	474	3330	5060	22.0486	1.29054	1.57902	1.55453	1.4747
NM_001160016	Gnb1	309	1332	3140	118.17	1.16702	1.80684	1.46318	1.47901
NM_010806	Mllt4	133	5596	7383	14.4185	0.205102	2.13406	1.90821	1.41579
NM_019635	Stk3	254	1748	2911	6.31341	0.198497	2.4252	1.64002	1.42124
NM_001145452	Arhgef33	195	2748	3261	12.7579	1.63154	2.24283	0.453199	1.44252
NM_001081354	Mamld1	157	2569	3457	13.4426	1.55982	1.58458	1.24137	1.46192
NM_001100449	Taf4b	350	2918	5149	1.40508	1.54828	1.29724	1.47939	1.44163
NM_018878	Paxip1	271	3442	5850	8.31639	1.54928	0.713108	1.89467	1.38569
NM_180974	Foxn2	187	1477	5084	24.9355	1.47781	1.64577	1.26621	1.46326
NM_001114096	Smarcc2	91	3484	4686	70.4282	1.10833	1.74648	1.54036	1.46506
NM_031165	Hspa8	81	2022	2104	1018.68	1.17023	1.41045	1.73148	1.43739
NM_015802	Dlc1	348	3627	6171	23.4463	1.67966	2.0871	0.471123	1.41263
NM_021536	Rhot1	193	2089	4137	31.9978	1.43998	2.29087	0.563932	1.43159
NM_001017985	C2cd3	210	7182	7813	9.53233	1.07612	1.67231	1.5903	1.44624
NM_183310	Ccser1	370	3058	5654	12.9055	1.13597	1.73039	1.48757	1.45131
NM_181071	Tanc2	287	6272	11860	2.93233	1.19434	1.40629	1.67392	1.42485
NM_210071	Eya3	173	1754	5160	6.58039	0.094532	1.8692	2.11896	1.3609
NM_001159963	Fbxl5	101	2174	2855	66.966	0.91344	1.87031	1.51532	1.43302
NM_133780	Tpr	106	7402	7550	34.4265	1.58196	1.53869	1.16171	1.42745
NM_001040611	Peg10	370	1501	6667	7.02391	0.542638	2.65802	0.978868	1.39318
NM_177231	Arrb1	293	1550	7112	38.2754	1.062	1.84555	1.4141	1.44055
NM_001033173	Usp31	0	4035	10198	26.7903	1.37893	1.81907	1.09338	1.43046
NM_001291068	Polr2a	410	6323	6736	22.9804	1.2728	1.6949	1.35476	1.44082
NM_001004436	Wapl	455	4058	6351	32.5066	0.630773	2.16174	1.46491	1.41914
NM_138306	Dgkz	117	2907	3494	147.303	1.24472	1.61687	1.43042	1.43067
NM_001111272	Stau2	179	1796	2759	8.17973	1.75222	1.04341	1.37354	1.38972
NM_010551	Il16	194	4163	4989	148.031	1.54913	1.94341	0.743922	1.41215
NM_001252496	Rapgef6	205	4747	7928	7.11631	1.23031	1.69443	1.38049	1.43508
NM_001164169	Pias2	188	1907	2073	15.4765	0.513157	2.5412	1.13258	1.39565
NM_020278	Lgi1	101	1775	4259	39.6019	1.21529	1.80605	1.27025	1.43053
NM_001025584	Kcnj6	528	1773	2356	22.7029	1.35716	1.75789	1.15022	1.42176
NM_001201413	Apbb2	571	2848	6665	10.9135	0.295747	2.01449	1.82559	1.37861
NM_011417	Smarca4	260	5105	6367	30.6861	1.29341	1.54947	1.42766	1.42351
NM_009194	Slc12a2	129	3750	6520	33.0857	1.27704	1.80967	1.1958	1.4275
NM_177214	Snrnp200	90	6501	6740	25.67	0.733955	2.04555	1.45053	1.41001
NM_001271679	Wnk3	62	5195	10259	3.24158	1.58428	1.81429	0.836487	1.41169
NM_146218	Rfwd3	42	2367	4443	25.4387	0.979758	1.88248	1.4046	1.42228
NM_008031	Fmr1	276	2121	4409	20.7235	1.57579	1.24963	1.37337	1.3996
NM_027326	Mllt3	312	2022	6112	7.01849	-1.05334	2.42469	2.11989	1.16375
NM_026574	Ino80	294	4974	6296	12.4963	0.990777	1.18265	1.9603	1.37791
NM_007988	Fasn	527	8042	9938	25.624	1.20084	1.87825	1.18583	1.42164
NM_177700	Atmin	34	2491	4877	29.2583	1.74228	1.26454	1.13573	1.38085
NM_001044308	Cacna1i	561	7161	9794	31.5366	1.35879	1.79029	1.09489	1.41466
NM_028420	Camk2n2	84	324	1282	17.284	2.29413	0.502609	1.10072	1.29915
NM_008226	Hcn2	35	2627	3195	22.9911	1.29245	2.13235	0.821845	1.41555
NM_001039474	Tcerg1	40	3343	4409	15.6897	1.14855	1.17508	1.83441	1.38601
NM_153548	E430025E21Rik	232	3712	4018	11.436	1.56549	2.08267	0.485683	1.37795
NM_008774	Pabpc1	467	2378	2820	17.5576	0.614373	1.49919	2.00514	1.3729
NM_001290369	Nmt2	167	1625	4411	21.4308	1.57541	1.21955	1.37133	1.38877
NM_175557	Zfp384	298	2053	3198	6.18271	-0.0225263	2.00004	2.005	1.3275
NM_001163610	Nhsl2	183	3843	12971	14.3162	1.04982	1.55215	1.60272	1.40156
NM_177263	Zhx3	456	3312	4480	35.0416	1.04101	1.6002	1.57152	1.40424
NM_001110147	Tnk2	484	3511	4313	31.2023	1.31918	1.63228	1.26638	1.40595
NM_133828	Creb1	225	1209	8379	24.7257	1.38757	1.93498	0.854467	1.39234
NM_134077	Rbm26	475	3427	4105	15.1977	1.44326	1.13545	1.5558	1.37817
NM_183186	Foxn3	64	1438	2611	40.5051	1.12549	1.82479	1.2524	1.40089
NM_007499	Atm	139	9340	11964	5.28256	1.37234	1.81878	0.996739	1.39595
NM_172381	AI314180	228	5751	5902	31.2882	0.842451	1.87841	1.43673	1.38586
NM_013771	Yme1l1	194	2342	4571	40.5657	0.842647	1.69378	1.6069	1.38111
NM_001005385	Gprasp1	1266	5310	5675	48.882	0.907416	1.45348	1.73642	1.36577
NM_025709	Gapvd1	582	4896	5966	33.888	1.08549	1.25517	1.7462	1.36229
NM_007881	Atn1	340	3868	4396	17.313	1.11592	1.57797	1.46991	1.38794
NM_001081321	Pds5a	147	4146	4146	24.3279	0.958361	1.77675	1.42606	1.38706
NM_011946	Map3k2	528	2388	10791	6.62949	0.856062	1.97783	1.29516	1.37635
NM_175751	Zfp608	546	5082	6112	3.79643	1.19213	1.76981	1.21143	1.39113
NM_001035854	Ap2b1	164	3020	5411	46.8898	1.43161	1.13982	1.52572	1.36572
NM_001195816	Pld5	320	1745	3267	58.7174	1.65053	1.66241	0.811474	1.37481
NM_001177720	Madd	84	4968	5905	62.0951	1.16523	1.75171	1.2494	1.38878
NM_001136085	Uba1	230	3407	4073	89.1578	1.00583	1.5439	1.57901	1.37624
NM_001289572	Spata7	174	1827	1975	8.08164	1.24152	1.79708	1.08583	1.37481
NM_175551	Dido1	329	7100	8476	16.0826	1.15853	1.7972	1.18281	1.37951
NM_184088	Dennd4c	375	6096	7793	5.00913	1.19341	1.68565	1.2541	1.37772
NM_001145779	Kif2a	39	2157	3711	14.7301	0.560576	1.98837	1.5126	1.35385
NM_001145967	Atg4c	196	1573	2796	7.29138	0.823542	1.54247	1.67295	1.34632
NM_183225	Usp24	259	8113	10601	13.0361	1.69913	1.53603	0.819272	1.35148
NM_198298	Helz	96	5994	6218	11.0486	0.822919	1.5663	1.65171	1.34698
NM_176976	Cep295	45	7188	7371	3.62315	0.699691	2.01378	1.3723	1.36193
NM_001284503	Cask	490	3271	8362	15.1419	0.830896	2.26346	0.965977	1.35344
NM_022028	Sav1	235	1396	2524	5.79258	0.608684	0.938018	2.27687	1.27452
NM_178888	Garnl3	115	3097	3387	21.9816	0.33681	2.06891	1.57204	1.32592
NM_001003912	Arhgef11	10	4669	5600	14.2881	1.02463	1.66919	1.3932	1.36234
NM_001081035	Nav3	0	7101	7782	5.43155	1.11815	1.98185	0.982179	1.36073
NM_011714	Baz1b	327	4767	6433	25.893	1.03689	1.70319	1.35394	1.36468
NM_001099624	Rapgef2	51	4536	6561	28.2124	0.713104	2.02662	1.28893	1.34288
NM_001024205	Nufip2	89	2168	10399	23.0422	0.609428	1.44909	1.90425	1.32092
NM_025961	Gatm	61	1333	2357	6.28624	1.75483	1.33816	0.874637	1.32254
NM_013751	Hrasls	115	619	2915	1.57766	1.5131	0.98622	1.43847	1.3126
NM_028288	Cul4b	72	2985	5002	18.6047	0.822993	1.85341	1.36289	1.34643
NM_001160018	Tor1aip1	245	1976	4302	9.47663	1.57467	1.21215	1.18868	1.32517
NM_001166398	Armcx2	873	3228	3614	16.4285	1.34878	1.70037	1.00588	1.35168
NM_001083321	Magi1	618	3681	5105	8.35534	1.18172	2.00108	0.854453	1.34575
NM_010408	Hcn1	384	3117	7911	11.8613	1.5725	1.62996	0.812808	1.33842
NM_001033347	D430041D05Rik	171	4416	10124	60.1335	0.799857	1.99152	1.22265	1.33801
NM_175115	Ikzf5	142	1402	4390	10.8945	1.47232	1.57982	0.979881	1.34401
NM_001301737	Dnm1	120	2676	3285	306.03	0.420875	1.8241	1.69784	1.31427
NM_201637	Chd8	0	7749	8190	24.1673	0.958649	1.66441	1.41418	1.34575
NM_028777	Sec14l1	210	2370	2869	65.9275	0.21047	2.32158	1.3912	1.30775
NM_130885	Oxr1	148	2485	4240	133.746	0.99594	1.7734	1.25739	1.34224
NM_001111304	Tbc1d9	723	4518	5848	56.5352	1.13226	1.92022	1.00558	1.35269
NM_145622	Zfp65	107	1280	3960	4.24513	1.34622	1.44688	1.22247	1.33852
NM_011286	Rph3a	435	2481	4150	141.96	1.06822	1.74435	1.22976	1.34745
NM_133195	Celf4	356	1811	3947	62.4271	1.32444	1.927	0.745378	1.33227
NM_018818	Chm	26	2015	4867	19.2769	2.35434	1.28772	-0.0144137	1.20922
NM_001042617	Cadps	341	4409	5460	33.4953	1.10248	1.54448	1.3832	1.34339
NM_172290	Ntm	203	1238	1808	153.682	1.33059	1.22351	1.40727	1.32046
NM_198303	Eif5b	280	3931	7797	5.10391	0.831288	1.27415	1.79794	1.30112
NM_024212	Rpl4	44	1304	1422	137.388	1.10717	1.15687	1.6589	1.30765
NM_001112705	Tlk2	527	2780	5481	14.7572	1.31844	1.5444	1.13287	1.3319
NM_001293663	Camk2d	489	2028	5593	57.3466	1.55222	1.36508	1.03627	1.31786
NM_175003	Arhgap44	323	2618	4074	65.1665	1.32191	1.51295	1.1501	1.32832
NM_001081216	Phip	198	5664	10729	21.6384	1.12316	1.73001	1.15961	1.33759
NM_009543	Rnf103	786	2838	3280	42.3842	1.03699	1.2167	1.64707	1.30026
NM_007664	Cdh2	852	3573	4843	20.4076	1.16105	1.4153	1.40685	1.32773
NM_001081426	Dip2c	457	5128	8026	18.0605	1.30976	1.40091	1.25167	1.32078
NM_153125	Sec16a	211	7285	8739	15.4021	1.17524	1.62676	1.194	1.332
NM_173369	Cyld	222	3081	8014	23.0528	1.81253	1.3851	0.678823	1.29215
NM_011211	Ptprd	879	5406	9127	29.8133	1.348	1.81814	0.790503	1.31888
NM_008514	Lrp6	216	5058	9368	15.2828	1.27384	1.70743	1.00853	1.32993
NM_001170555	Prkag2	156	1140	2261	13.0029	0.4118	0.236708	2.69194	1.11348
NM_001081028	Sipa1l3	616	5947	7713	9.20767	0.860458	1.83044	1.24578	1.31222
NM_028493	Rhobtb3	292	2128	4937	4.33251	-0.896084	2.63528	1.56412	1.10111
NM_009655	Alcam	532	2284	4959	4.02632	1.21096	2.03993	0.674799	1.30856
NM_172464	Daam1	166	3400	5888	11.0054	0.954968	1.56699	1.42138	1.31445
NM_176972	Usp37	375	3315	7196	9.24089	1.01667	1.46429	1.43929	1.30675
NM_001198911	Arhgef2	326	3233	4422	27.1752	0.62189	1.96797	1.32356	1.30447
NM_173423	Fem1c	538	2392	2866	26.259	0.70429	2.13956	1.07509	1.30631
NM_001290421	Flna	2073	8040	8369	1.63745	0.927554	1.98152	1.021	1.31003
NM_011055	Pde3b	297	3597	5286	9.3244	0.845173	2.07608	1.00431	1.30852
NM_011256	Pitpnm2	533	4379	6953	8.73778	1.11871	1.75052	1.08468	1.31797
NM_001290814	Aff3	103	3793	7251	2.82028	-0.086942	1.98492	1.8096	1.23586
NM_001039079	Prkcz	555	1785	4111	109.748	1.11092	1.58899	1.24083	1.31358
NM_008882	Plxna2	643	6328	11036	12.4943	0.90286	1.57348	1.42599	1.30078
NM_001164639	Slk	175	3784	6937	34.76	1.00731	1.69314	1.23866	1.31304
NM_009091	Rps15	50	488	522	117.571	1.39356	1.39009	1.10502	1.29622
NM_198292	Tex2	98	3485	4942	31.225	1.15667	1.50922	1.25584	1.30724
NM_009688	Xiap	379	1870	6550	19.9287	1.16723	2.02293	0.703717	1.29796
NM_181322	Ctcf	309	2520	3823	51.1737	0.965327	1.29482	1.58055	1.28023
NM_172424	Med13l	67	6691	9296	19.8949	1.56104	1.29711	0.986252	1.28147
NM_212473	Fam53b	303	1572	5131	13.5437	1.02289	1.71776	1.1635	1.30138
NM_001177888	Cacna1g	581	7379	8133	18.5123	1.47754	1.33448	1.04368	1.28523
NM_172819	Dip2b	61	4084	8127	35.5772	0.925584	1.45865	1.46687	1.2837
NM_001166379	Armcx1	518	1889	2285	43.6233	1.98179	1.08792	0.62696	1.23222
NM_028601	Zmiz2	225	2988	4053	35.198	0.707857	1.27067	1.80108	1.25987
NM_001160370	A830018L16Rik	464	1328	6815	1.95679	1.61949	1.65377	0.534176	1.26915
NM_001159534	Cacna1c	520	6940	13592	17.563	0.791962	1.99867	1.05027	1.2803
NM_009555	Zfp40	336	2727	4079	2.37313	1.85444	0.475068	1.27412	1.20121
NM_001082484	Snx27	167	1787	5469	24.9595	1.14867	1.20961	1.4516	1.26996
NM_001081378	Kidins220	164	5546	7402	89.1887	1.09316	1.34262	1.40329	1.27969
NM_198862	Nlgn2	411	2922	5002	54.7586	0.870826	1.68879	1.28316	1.28093
NM_178722	Zfp438	203	2600	3209	1.23209	-0.603472	2.35641	1.65609	1.13634
NM_001114125	Dab2ip	115	3514	5388	94.0966	0.805342	1.60093	1.4092	1.27183
NM_175114	Trak1	146	2966	4886	35.6583	1.25636	1.43209	1.12012	1.26952
NM_001205241	Kat6b	301	5593	7198	7.62783	0.271997	2.32579	1.11917	1.23899
NM_001081353	2210408I21Rik	96	1071	1749	6.2992	1.40038	1.72044	0.672088	1.2643
NM_001302351	Kcnt1	98	3773	5929	44.8862	1.01339	1.61886	1.18766	1.2733
NM_027230	Zmynd8	217	3985	5423	19.9602	1.05125	1.56575	1.21327	1.27675
NM_001033194	Gtf3c3	112	2761	4764	4.51308	0.553041	1.61041	1.59618	1.25321
NM_019426	Atf7ip	120	4041	4527	30.5432	0.764698	1.46043	1.54304	1.25606
NM_026666	Ubn1	867	4275	6455	17.7759	1.45119	1.74404	0.578317	1.25785
NM_026147	Rps20	169	529	3446	10.1967	-4.61401	2.26022	2.41114	0.0191169
NM_001199048	Zfp942	591	2052	3275	5.16921	0.923383	1.68034	1.2049	1.26954
NM_139232	Fgd4	395	2696	8344	15.3936	1.09536	1.63857	1.07762	1.27052
NM_029094	Pik3cb	348	3543	4854	12.4542	1.3209	2.02504	0.366139	1.23736
NM_009127	Scd1	300	1368	4837	25.397	1.25496	1.79941	0.720528	1.2583
NM_022655	Ireb2	123	3015	5808	34.0314	0.660179	1.60112	1.50354	1.25495
NM_001163387	Nlgn1	361	2806	4603	8.30221	0.340345	2.02221	1.35324	1.2386
NM_001034907	Zc3h12b	857	3365	3365	7.25692	0.69805	1.85047	1.22577	1.2581
NM_172741	4931406P16Rik	413	3593	5808	10.4435	1.00749	1.80218	0.991079	1.26692
NM_001163450	Mapk8ip3	123	4044	5486	90.5104	0.895794	1.5676	1.30612	1.25651
NM_011806	Dmtf1	292	2578	3739	19.009	0.798525	1.7127	1.25247	1.25456
NM_001289546	Amph	82	2155	3231	116.679	0.476875	1.67588	1.56722	1.23999
NM_001163455	Tbck	279	2961	6578	8.13087	-0.196935	2.59741	1.06211	1.1542
NM_019737	B4galt6	937	2086	5808	47.1203	0.816591	1.29271	1.57342	1.22757
NM_030695	Lrba	285	8850	9883	11.9927	1.03407	1.60489	1.11255	1.2505
NM_025816	Tax1bp1	134	2579	3285	43.9477	1.34964	0.940383	1.37296	1.22099
NM_183146	Zfp729a	71	2993	5180	4.82135	1.1833	0.895492	1.56781	1.21553
NM_021554	Mettl9	366	1323	1823	15.517	1.67866	1.74706	0.168669	1.19813
NM_013767	Csnk1e	142	1393	2760	22.5342	0.769281	1.11836	1.73263	1.20676
NM_026952	Cdk12	63	3840	4846	13.1428	1.16597	1.61118	0.986144	1.25443
NM_177832	Zfp236	37	5437	9473	10.775	1.0568	1.74379	0.974298	1.25829
NM_183106	Ttc17	24	3621	4591	22.687	0.0492849	1.66827	1.84238	1.18664
NM_023858	Mtmr2	140	2072	3017	28.465	0.823781	1.07665	1.70515	1.20186
NM_001035228	St3gal5	96	1341	2241	83.7979	0.876167	1.2727	1.49751	1.21546
NM_021516	Mark3	541	2776	3388	34.9943	0.0169434	2.07344	1.4666	1.18566
NM_145959	Fam91a1	238	2752	5621	19.1095	0.173098	1.85591	1.55967	1.19622
NM_053089	Naa15	307	2905	6090	16.6717	0.877258	1.41165	1.38608	1.225
NM_001285914	Cdh8	590	2726	3166	39.1678	1.28466	0.724627	1.55315	1.18748
NM_001038607	Kcnh1	231	3120	7158	30.0255	1.10764	1.50883	1.09328	1.23658
NM_181585	Pik3r3	394	1780	5004	78.9231	1.53127	1.44633	0.677545	1.21838
NM_052976	Ophn1	664	3073	7207	4.68854	0.254474	1.60718	1.71076	1.19081
NM_175260	Myh10	299	6230	7783	58.3068	1.33396	1.57795	0.758288	1.2234
NM_153403	Ago1	162	2736	7227	27.7906	1.07485	1.41526	1.2058	1.23197
NM_025780	Thap2	160	814	3408	3.00511	0.790164	0.192048	2.26852	1.08358
NM_001081315	Brpf3	262	3877	5973	3.46297	0.569076	2.15692	0.940861	1.22228
NM_018869	Grk5	831	2604	3168	9.83541	1.03464	1.79087	0.869199	1.23157
NM_024225	Snx5	145	1360	2419	17.8125	1.25998	1.31313	1.06508	1.21273
NM_007726	Cnr1	589	2011	5807	208.153	1.19432	1.1277	1.31801	1.21334
NM_009125	Atxn2	27	3888	4472	10.3136	0.14932	1.73681	1.64449	1.17687
NM_133752	Opa1	206	3089	5948	40.9218	1.24344	1.11153	1.25519	1.20338
NM_001163623	Prepl	210	2127	3294	51.2037	0.0333563	1.75405	1.71206	1.16649
NM_001033222	Pdzd8	193	3637	7076	24.8195	0.578177	1.55401	1.50431	1.21217
NM_029090	Naa60	194	923	2425	27.5022	1.02603	1.40555	1.2246	1.21873
NM_030113	Arhgap10	124	2485	3038	11.0201	1.0456	1.19692	1.38909	1.21054
NM_001081324	Neto2	36	1698	5646	56.9361	0.860201	1.46045	1.30808	1.20958
NM_008139	Gnaq	495	1575	5634	25.8236	-1.09206	2.1595	1.86453	0.977326
NM_010829	Msh3	103	3391	3945	10.009	1.13419	1.40307	1.10539	1.21422
NM_011884	Rngtt	150	1944	4157	7.12766	0.454122	1.34549	1.7197	1.1731
NM_009483	Kdm6a	431	4706	5935	13.322	1.27955	1.21725	1.09905	1.19862
NM_013699	Ubp1	411	1926	3745	18.7301	1.1776	1.49267	0.9802	1.21682
NM_001135559	Sos2	251	4250	5612	13.7906	1.44467	1.39801	0.759964	1.20088
NM_010923	Nnat	111	357	1248	8.97821	1.61129	-3.86657	2.45037	0.0650309
NM_001033279	D17Wsu92e	208	1084	3812	76.5221	0.209839	1.25385	1.9426	1.13543
NM_178112	Ints8	149	3137	3434	13.6918	0.781542	1.01578	1.68715	1.16149
NM_172449	Bzrap1	861	6402	7616	20.4606	0.581101	1.84132	1.17287	1.19843
NM_001163026	Dnajc13	245	6977	7697	16.1069	0.844116	1.69266	1.08716	1.20798
NM_029349	2310035C23Rik	247	3826	5334	25.0983	0.779724	1.75432	1.0703	1.20145
NM_054081	Mta1	140	2237	2775	10.5935	0.752511	1.78065	1.06882	1.20066
NM_027854	Tmem248	257	1202	3669	19.9905	0.823453	1.75282	1.03786	1.20471
NM_175455	Ankrd34b	543	2070	3940	3.29012	0.518023	2.07982	0.991884	1.19657
NM_175472	Zcchc11	489	5424	6054	19.1862	0.96341	1.88024	0.764817	1.20282
NM_175180	Wdr44	412	3160	4179	8.37714	0.751921	2.58479	0.0094834	1.1154
NM_001042528	Cacna1b	105	7089	9772	22.4857	0.874432	1.57739	1.1274	1.19307
NM_001289916	Rora	180	1584	10869	40.0009	0.878688	1.65737	1.05868	1.19825
NM_001297591	Inpp4b	401	3227	4406	14.1388	0.166585	1.53477	1.74867	1.15001
NM_008684	Neo1	313	4792	7387	23.4871	1.2992	1.16892	1.09057	1.18623
NM_011958	Orc4	168	1470	4029	8.81588	0.217116	0.82195	2.22703	1.0887
NM_001081184	Focad	78	5475	5796	7.66116	0.826267	1.66901	1.08826	1.19451
NM_172710	Sel1l3	146	3560	4512	151.576	0.938124	1.62026	1.03751	1.19863
NM_029836	Tspyl2	159	2193	2758	24.1962	0.837071	1.44893	1.27904	1.18835
NM_001085492	Rere	304	4981	7458	32.6928	1.05867	1.71126	0.83363	1.20119
NM_178896	Dcun1d4	141	1020	4127	7.81754	1.43361	0.729798	1.27956	1.14766
NM_001166497	3110052M02Rik	558	1941	4367	2.65195	1.77706	1.77773	-0.323341	1.07715
NM_146109	Als2	135	2922	2977	198.926	1.14104	1.56881	0.880847	1.1969
NM_001005509	Eif2a	238	1984	2299	14.7965	0.836803	0.740535	1.7886	1.12198
NM_009461	Ubr1	113	5387	7765	16.1231	0.873786	1.51622	1.14326	1.17775
NM_021278	Tmsb4x	128	263	670	161.476	0.920623	0.882073	1.61633	1.13968
NM_175091	Tnks	25	3988	6444	29.1843	1.13641	1.84498	0.554436	1.17861
NM_198250	Lrrc4b	80	2210	2726	86.3441	0.978422	1.76807	0.81211	1.1862
NM_013883	Scmh1	459	2454	3394	6.5079	1.34991	2.25133	-0.379999	1.07375
NM_010629	Kifap3	288	2607	4010	33.29	0.990608	1.26413	1.2501	1.16828
NM_019439	Gabbr1	324	3207	4486	183.755	0.604392	1.55155	1.37169	1.17588
NM_024191	Arl2bp	264	756	2095	29.1313	1.56229	1.93545	-0.241987	1.08525
NM_026013	Dram2	262	1066	2722	6.14794	0.106715	1.7514	1.54955	1.13589
NM_021450	Trpm7	285	5877	7145	10.7013	0.71053	1.48102	1.2999	1.16382
NM_010251	Gabra4	499	2158	4123	2.30064	0.591091	1.82986	1.0827	1.16788
NM_001291150	Ptprt	248	4586	12114	18.7238	1.16257	1.40402	0.965186	1.17726
NM_019939	Mpp6	292	1912	2180	17.2981	1.34615	1.20662	0.930309	1.16103
NM_019763	Spen	351	11283	12299	11.1654	0.926991	1.75262	0.84837	1.17599
NM_016893	Fut8	515	2243	2923	79.0866	1.43438	1.52536	0.528076	1.16261
NM_172859	Dzank1	127	2464	6831	21.4324	1.21664	1.93739	0.275584	1.1432
NM_212450	Ctdspl2	641	2039	6737	16.9645	0.761918	2.43189	0.154394	1.11607
NM_001109753	Sv2b	564	2616	5317	215.34	1.0875	1.22863	1.16486	1.16033
NM_001178049	Mitf	61	1594	4777	2.68756	1.20628	0.620515	1.52026	1.11569
NM_018779	Pde3a	321	3747	4205	9.38833	0.594789	1.70724	1.20927	1.17043
NM_001110254	Zfp945	207	2592	6497	1.15513	-0.561489	-0.0539084	2.96431	0.78297
NM_007676	Psg16	452	1613	2283	8.03658	1.01729	0.725464	1.59884	1.11386
NM_018785	Prpf40a	0	2862	3565	10.6316	1.14988	1.56408	0.81065	1.17487
NM_181732	Aida	459	1377	3293	7.44207	1.39749	0.69912	1.24588	1.11416
NM_029432	4930402H24Rik	99	3639	6639	8.76349	0.94723	1.3088	1.20256	1.15286
NM_180600	Ube2q2	266	1403	2941	29.0633	0.355047	1.50608	1.55089	1.13734
NM_007945	Eps8	330	2796	4567	28.0974	0.256312	1.87051	1.26118	1.12933
NM_009677	Ap1g1	383	2861	6876	22.5225	1.10539	1.48624	0.898847	1.1635
NM_015824	Orc3	33	2181	6313	14.6637	1.02815	1.61737	0.84289	1.1628
NM_176832	Spire1	131	1679	4761	37.7059	0.76965	1.55486	1.1225	1.149
NM_133665	Mef2d	434	1958	5406	12.7794	0.374967	1.61683	1.41893	1.13691
NM_177078	Adrbk2	59	2126	6561	24.0428	1.33185	0.882355	1.12206	1.11209
NM_001128103	Ano3	141	3087	6026	18.7596	0.954277	1.47563	1.01983	1.14991
NM_176987	Simc1	71	4136	4793	3.65534	0.856125	1.82132	0.7398	1.13908
NM_009469	Ulk1	357	3513	5196	42.2618	1.09556	1.69705	0.665136	1.15258
NM_020009	Mtor	120	7770	8595	14.2899	0.650163	1.46464	1.30573	1.14018
NM_011361	Sgk1	84	1380	2456	21.2951	1.33372	1.51913	0.544992	1.13262
NM_001081201	Dpy19l4	116	2285	2984	9.24175	1.04037	1.54045	0.878019	1.15295
NM_207523	Rpl23a	41	512	560	101.236	1.69126	0.382398	1.08821	1.05396
NM_001162906	2410089E03Rik	521	10166	10469	3.52901	1.21351	1.06329	1.09893	1.12524
NM_011952	Mapk3	20	1163	1772	14.4612	1.46038	1.82608	-0.0461134	1.08011
NM_010772	Maz	60	1494	2374	66.0831	0.992832	1.37498	1.0548	1.14087
NM_178740	Slitrk4	319	2833	3935	68.0644	0.86742	1.8089	0.712912	1.12974
NM_010137	Epas1	419	3044	5352	2.40301	1.22757	0.654168	1.39509	1.09227
NM_013843	Zfp53	308	2267	3079	2.07113	0.407894	1.65828	1.31976	1.12864
NM_001101433	Zcchc24	0	726	4375	2.82238	0.673274	1.08209	1.56978	1.10838
NM_001081183	1110037F02Rik	85	5671	7115	13.7404	0.876999	1.50316	1.0169	1.13235
NM_016799	Srrm1	97	2869	3732	6.6612	1.08522	1.39911	0.939121	1.14115
NM_028915	Lrrcc1	146	3128	3359	4.09153	1.01999	1.50323	0.898071	1.14043
NM_001001735	Whsc1l1	497	2465	3652	19.1859	0.787237	1.79153	0.811037	1.12994
NM_024272	Ssbp2	90	1176	6656	6.19153	1.25412	1.57609	0.526679	1.11896
NM_001114664	Iqsec2	205	4645	5995	28.5822	1.20607	1.25202	0.917305	1.12513
NM_012024	Ppp2r5e	573	1977	4810	19.9803	0.66761	1.18199	1.46701	1.10554
NM_001109042	Kif21a	249	4953	6128	33.8924	0.960563	1.26452	1.11225	1.11245
NM_025588	Exoc2	95	2870	4250	12.0201	1.2803	0.907446	1.10491	1.09755
NM_001081567	Mapk10	566	1961	6599	40.4447	0.882023	1.41156	1.06147	1.11835
NM_001077190	Abi1	176	1622	3505	33.4005	0.933293	1.73191	0.707193	1.12413
NM_001003920	Brsk1	152	2489	2996	28.7428	1.19606	1.47385	0.687909	1.11927
NM_172688	Map3k7	156	1896	5682	12.4838	0.611385	2.24815	0.434116	1.09788
NM_133821	Phlpp1	135	5199	6104	21.2173	0.48496	1.64276	1.22479	1.1175
NM_177381	Cog3	55	2542	4222	20.8726	0.626568	1.5304	1.2014	1.11946
NM_001290572	Ralgps1	289	1837	6098	9.05815	0.5378	1.69218	1.11341	1.11446
NM_172120	Vps41	24	2586	3197	50.2127	0.888498	1.39412	1.05721	1.11327
NM_178750	Ss18l1	317	1526	4369	14.7781	1.36771	0.271581	1.44511	1.02813
NM_001004154	Rragb	526	1651	2281	32.2547	1.53663	0.868787	0.826835	1.07742
NM_001166414	Rfx3	162	2412	9146	6.98085	1.13859	1.76922	0.405197	1.10433
NM_030692	Sacm1l	8	1772	3433	42.0943	0.936943	1.21695	1.1588	1.10423
NM_010487	Elavl3	425	1529	5027	65.8749	0.693765	1.3393	1.28196	1.10501
NM_001110780	Syn1	129	2142	3175	50.2659	0.23585	1.13367	1.79682	1.05545
NM_028658	Ppp1r21	138	2481	3135	42.6105	0.842799	0.717064	1.60462	1.05483
NM_019550	Ptbp2	179	1778	3364	24.978	0.681665	1.11247	1.46998	1.08804
NM_001081300	Tshz1	1159	4414	5814	13.4026	0.669563	1.22809	1.39566	1.09777
NM_008422	Kcnc3	0	2310	5056	107.327	1.2917	1.54223	0.460192	1.09804
NM_009030	Rbbp4	137	1415	4407	39.2128	0.762027	1.14298	1.37596	1.09366
NM_178602	Polr2m	187	1288	2248	68.0268	0.358449	1.80778	1.09705	1.08776
NM_020007	Mbnl1	1120	2266	5655	24.3079	0.854948	0.347658	1.81454	1.00572
NM_001029873	Unc13a	110	5249	7960	23.962	0.282749	1.62504	1.34615	1.08465
NM_133667	Pdk2	115	1339	2263	46.6368	1.21635	1.09271	0.973685	1.09425
NM_016920	Atp6v0a1	177	2694	4008	85.3467	0.628351	1.74775	0.940663	1.10559
NM_001038999	Atp8a1	221	3716	8176	61.0693	0.998011	1.43374	0.886359	1.10604
NM_027375	Gcc2	40	5083	6511	23.3198	0.98755	1.46958	0.853277	1.10347
NM_001290486	Lpar1	125	1166	3247	1.28046	1.57905	1.07524	0.514771	1.05635
NM_001253365	Kcnma1	80	3785	4982	10.8269	0.76762	1.2502	1.23485	1.08422
NM_001081355	Prdm2	160	5290	7308	22.0546	1.20442	1.35279	0.70941	1.08887
NM_177137	Gnal	230	1577	5654	21.8582	1.26398	2.18347	-0.526043	0.973803
NM_010123	Eif3a	176	4211	5176	32.9782	1.12261	1.25967	0.897141	1.09314
NM_001164412	Cnot4	328	2248	3314	5.99667	0.864295	1.99716	0.308371	1.05661
NM_007839	Dhx15	196	2584	3042	37.1928	0.151633	1.2754	1.65716	1.02806
NM_001267872	Zdbf2	459	7941	12571	1.67599	0.75853	1.1425	1.31833	1.07312
NM_009297	Supt6	186	5367	6201	22.9102	0.797682	1.50226	0.962256	1.0874
NM_001037136	Agap1	619	3034	9422	52.0681	0.691167	1.66526	0.928463	1.09496
NM_001081092	Taf4	0	3129	4422	5.71897	0.992593	1.42288	0.854058	1.08984
NM_198021	Scyl2	276	3069	3431	16.765	0.76984	1.73658	0.747866	1.08476
NM_145979	Chd4	177	5925	6438	42.2633	1.23058	1.54966	0.452229	1.07749
NM_009793	Camk4	355	1765	12331	175.879	1.48994	1.29992	0.351336	1.04707
NM_133247	Usp33	213	2943	4194	70.5695	0.613559	1.63614	1.01331	1.08767
NM_001293707	Pip5k1a	479	2123	3676	11.4949	1.32267	1.69172	0.1495	1.05463
NM_011544	Tcf12	266	2387	4707	10.9701	0.980312	1.46144	0.809457	1.08374
NM_207515	Mbnl2	682	1750	4499	51.6604	1.13555	0.445378	1.47277	1.0179
NM_177710	Ssh2	28	4300	9040	10.9531	1.08646	1.10436	1.02259	1.07114
NM_009418	Tpp2	95	3884	4691	18.1882	0.870915	1.7742	0.549442	1.06485
NM_001164363	Nt5c2	433	2194	4181	11.704	0.213782	1.68775	1.26211	1.05455
NM_001290345	Map4k3	136	2821	4156	34.8553	0.75444	1.02288	1.37422	1.05051
NM_013889	Zfp292	29	8126	9977	20.0146	0.946196	1.3972	0.892347	1.07858
NM_001004062	Crtc1	15	1908	5674	23.2733	1.15431	0.499821	1.40556	1.0199
NM_028262	Setd3	139	1924	2725	75.0896	0.930062	1.35467	0.9268	1.07051
NM_145525	Osbpl6	502	3406	8071	14.6298	0.956914	1.47333	0.771775	1.06734
NM_001081179	Heatr5b	98	6311	6437	15.6326	1.04635	1.23117	0.925034	1.06752
NM_018872	Tmem131	182	5816	6548	17.1223	0.833599	1.04312	1.25363	1.04345
NM_133719	Metrn	83	959	1363	41.5663	1.53855	0.386991	1.03856	0.988036
NM_001177884	Whsc1	29	1976	7790	24.2147	0.899726	1.58551	0.689583	1.05827
NM_028032	Ppp2r2a	375	1719	4037	10.8342	1.06027	1.64232	0.475001	1.0592
NM_028981	Cacna1d	55	6556	8688	5.65443	1.22385	1.46839	0.457852	1.05003
NM_173764	Tapt1	3	1698	3492	44.5424	2.05152	1.23781	-0.691361	0.865992
NM_153509	AF529169	422	3176	4250	1.46046	-3.56731	3.04573	0.618802	0.0324078
NM_001122594	Phlpp2	16	4084	7847	15.0125	0.987243	1.51086	0.685344	1.06115
NM_207213	Snx25	63	2586	3067	53.9309	0.609116	1.07031	1.42963	1.03635
NM_001039493	Plekhm3	360	2646	8562	8.75912	0.408499	1.27708	1.41874	1.03477
NM_001130476	Tpst1	393	1506	2054	13.8063	1.52371	0.435101	1.01952	0.992778
NM_009147	Sec23a	197	2495	4108	28.5624	0.764302	1.56111	0.867894	1.06444
NM_011274	Uri1	332	1928	3451	14.944	0.961053	1.44865	0.774859	1.06152
NM_001142809	Slc6a8	656	2564	3966	25.2152	1.26968	1.17338	0.694959	1.046
NM_001272064	Trim24	300	3354	6089	4.12134	1.20405	1.93359	-0.14062	0.999006
NM_028759	Dcaf6	236	2867	3306	26.1245	0.202086	1.77994	1.10365	1.02856
NM_019654	Socs5	442	2053	4394	19.4749	0.804922	1.48564	0.868623	1.05306
NM_008679	Ncoa3	220	4432	7531	7.2265	0.437771	1.63574	1.06524	1.04625
NM_007547	Sirpa	444	1974	4018	215.585	0.721894	1.68382	0.751189	1.0523
NM_153422	Pde5a	88	2686	6728	5.40641	1.80574	0.405735	0.669993	0.960489
NM_175642	Adgrb3	261	4830	5522	33.6916	0.853771	1.57343	0.705243	1.04415
NM_001004164	Gnptab	7	3715	5204	8.19706	1.06833	1.28528	0.759932	1.03785
NM_009582	Map3k12	251	2918	5352	57.0108	-0.0154478	1.50167	1.50953	0.998584
NM_001080706	Btaf1	309	5856	8509	10.5924	0.0272575	1.81343	1.18007	1.00692
NM_001033268	Fam120a	0	3339	4919	29.4929	0.377923	1.64281	1.07553	1.03209
NM_177646	Dgkd	14	3677	5694	209.237	0.973262	1.2738	0.871846	1.03964
NM_018853	Rplp1	82	427	468	162.879	0.562326	0.844748	1.57954	0.995537
NM_001009575	Armcx5	674	2495	2826	3.40729	0.245144	0.95507	1.71727	0.972494
NM_001081061	Bdp1	232	7636	9921	12.4585	0.771187	1.41179	0.931054	1.03801
NM_001289702	Pde4dip	37	7276	8260	35.0248	0.905921	1.27918	0.899857	1.02832
NM_001290729	Taf1	87	5769	8033	12.7007	0.702152	1.69193	0.716674	1.03692
NM_028999	Ppp6r3	263	2885	4957	24.0882	0.835702	1.64492	0.625819	1.03548
NM_009173	Siah1b	419	1268	1799	2.30306	2.14196	-0.0116992	0.463599	0.864622
NM_199012	Fchsd2	244	2539	4411	10.9526	1.45238	1.12634	0.433611	1.00411
NM_010880	Ncl	232	2356	8257	13.6284	0.861402	1.75912	0.416746	1.01242
NM_001081412	Bcr	130	3943	6537	12.7867	1.46663	1.232	0.288177	0.995602
NM_028802	Gpcpd1	202	2230	3701	20.5332	1.58182	1.11919	0.242361	0.981124
NM_009939	Cops2	93	1425	3316	33.3183	1.46813	1.92598	-0.757848	0.878756
NM_001033149	Ttc9	156	816	4778	14.6522	-0.0763296	1.73538	1.32342	0.994155
NM_134112	Kctd1	122	920	1772	7.40114	0.0175993	-0.680157	2.67363	0.670356
NM_001048177	Jak2	341	3740	4972	13.0326	0.207151	1.56232	1.25014	1.00654
NM_011625	Ppp1r13b	185	3449	4333	20.5887	0.756283	1.75278	0.554189	1.02108
NM_013761	Srr	410	1430	3699	6.85384	-0.29513	2.01561	1.14232	0.954264
NM_001114609	Ino80d	281	3347	13529	6.66587	0.453988	1.44587	1.15585	1.01857
NM_008417	Kcna2	681	2181	11582	53.5018	0.849024	1.03213	1.11412	0.998423
NM_001004143	Usp22	174	1752	4442	73.0831	0.607904	1.60453	0.857524	1.02332
NM_001007574	A830010M20Rik	72	3339	6756	19.5127	0.461942	1.74448	0.847475	1.01797
NM_007792	Csrp2	80	662	889	1.16213	2.47015	0.977064	-3.18366	0.0878511
NM_134123	Scaf8	417	4224	4873	24.5538	0.57691	1.67947	0.813537	1.0233
NM_172684	Rsbn1	331	2719	6727	12.5164	1.32319	1.85686	-0.43917	0.913626
NM_001177883	Elavl2	576	1656	4130	3.49065	1.57079	0.371152	0.871787	0.937909
NM_016976	Grm1	401	4001	6905	53.2557	1.10305	1.07465	0.853796	1.0105
NM_001252403	Gria1	250	2767	5365	24.0533	0.895446	1.75545	0.323065	0.99132
NM_001276360	Camsap1	344	5126	8014	38.7441	0.790776	1.59283	0.631313	1.00497
NM_198296	9130011E15Rik	84	2154	2896	4.41347	0.505843	2.4502	-0.204797	0.917082
NM_008881	Plxna1	280	5965	9028	24.9264	0.43775	1.37129	1.17726	0.995433
NM_001286718	Tsc2	119	5345	6134	21.9949	0.304666	1.94593	0.684256	0.978285
NM_080855	Zcchc14	32	2903	6476	29.8429	0.878936	1.09117	1.00635	0.992151
NM_001013441	Ric8b	129	1692	4842	13.6104	0.304578	1.27644	1.34541	0.975478
NM_001204875	Set	347	1181	2816	80.8401	1.25116	1.28909	0.396235	0.978829
NM_001163571	Senp3	107	1814	2230	27.1647	0.220242	1.37874	1.32632	0.975102
NM_027045	Ccser2	262	2764	7496	17.6417	-0.0988812	1.56677	1.40713	0.958339
NM_028791	Cmtr1	182	2696	6380	20.2472	1.52046	0.711449	0.618757	0.950222
NM_001098528	Kcnb2	0	2724	5309	3.63166	1.21476	1.59571	0.0987586	0.969743
NM_175337	Mlh3	125	4361	5517	6.51002	0.678457	1.31681	0.992926	0.996065
NM_001301370	Syt14	140	1865	7939	4.45973	0.178297	1.70646	1.0521	0.978955
NM_133355	Grid2ip	54	3129	3459	3.33454	1.08587	1.47626	0.389145	0.983759
NM_029436	Klhl24	242	2045	6683	21.3642	0.855644	1.70366	0.388682	0.982662
NM_008237	Hes3	385	913	1829	1.23248	1.57898	2.0794	-3.21823	0.146715
NM_001304266	Srcap	638	10454	10904	20.6082	0.545791	1.60424	0.852664	1.0009
NM_033552	Slc4a10	130	3397	5442	34.1397	0.861081	1.4638	0.633894	0.986258
NM_010808	Mmp24	131	1988	4306	112.933	0.916232	1.08714	0.951613	0.984993
NM_148948	Dicer1	279	6000	9851	10.7845	0.55798	1.62596	0.803009	0.99565
NM_025646	Crls1	183	750	1599	19.5892	0.986379	1.18102	0.786755	0.984718
NM_008614	Mobp	139	385	3286	3.30409	2.14971	1.54111	-3.79831	-0.0358307
NM_027882	Cic	671	5486	6110	35.5348	0.666962	1.43622	0.873888	0.992358
NM_177047	Auts2	520	4305	6059	5.29801	0.273756	1.81459	0.817088	0.968478
NM_172482	Zfp719	272	2480	4993	8.74521	1.45944	0.743236	0.621759	0.941478
NM_207214	Exoc5	515	2642	4659	21.4932	1.72946	0.535332	0.409753	0.891514
NM_175535	Arhgap20	156	3705	6365	11.2022	0.811327	1.80472	0.276863	0.964302
NM_001082414	Sh3d19	233	2603	6414	1.24644	0.991595	2.22773	-0.656308	0.854339
NM_172911	D8Ertd82e	288	4410	4780	26.9016	1.04106	1.06737	0.825701	0.978046
NM_011215	Ptprn2	145	3151	4688	69.8693	0.982486	1.30664	0.632302	0.973808
NM_134027	Med1	210	1881	2822	17.663	1.29019	1.27388	0.28835	0.950809
NM_153574	Fam13a	162	2244	4293	21.5725	0.642846	1.24186	1.0234	0.96937
NM_009025	Rasa3	140	2645	4118	75.8416	1.20134	1.36833	0.306521	0.95873
NM_001113386	Lifr	415	2575	2844	5.20012	0.356097	1.28232	1.22228	0.953567
NM_172664	Tlk1	149	2450	4032	13.3934	0.17033	2.26498	0.311499	0.915604
NM_010308	Gnao1	498	1563	2948	73.6351	-0.0512971	1.412	1.42034	0.927014
NM_145390	Tnpo2	119	2813	4866	28.3314	0.346659	1.64735	0.906334	0.966781
NM_172806	Btbd7	450	3843	4306	4.91184	1.32025	0.667816	0.826694	0.938253
NM_001085495	Arfgef2	134	5513	8777	17.0787	1.20665	0.931026	0.708976	0.948884
NM_025695	Smc6	408	3702	5603	21.6619	0.563713	1.70659	0.648605	0.972971
NM_173431	Rpgrip1l	27	3822	6969	2.83498	1.09217	1.27811	0.50303	0.957769
NM_027706	Nbas	24	7095	7240	10.8066	1.05858	1.31898	0.496157	0.957908
NM_001081341	Scaper	177	4374	5259	9.53612	1.18663	1.5153	0.129638	0.943855
NM_153600	Ttc26	67	1732	4140	1.07087	0.997772	1.83565	-0.0576352	0.925264
NM_029896	Wdr82	290	1232	4313	81.8422	-0.516122	1.60792	1.53524	0.875677
NM_001284373	Atf2	360	1530	3943	30.8018	0.282479	1.01205	1.47544	0.923321
NM_001195632	Arhgap32	0	6270	10633	4.68837	0.2895	1.81214	0.745787	0.949142
NM_001159604	Pum1	120	3687	5348	20.9491	0.618867	1.39105	0.901339	0.970419
NM_021346	Zfp318	73	3538	3921	3.84253	1.05962	1.62698	0.133466	0.940023
NM_009093	Rps29	128	299	390	131.549	0.689988	-0.325902	1.98083	0.781639
NM_198010	Ankrd17	138	7197	9313	29.683	0.709452	1.52111	0.659131	0.963232
NM_178936	Tmem56	249	1080	6224	43.4016	1.32833	1.1131	0.352265	0.93123
NM_178639	Sfxn5	7	1036	3654	29.4358	0.492177	1.37876	1.00931	0.960085
NM_001042607	Ryk	136	1912	3258	8.63098	1.10256	0.0658799	1.42903	0.865823
NM_028385	Setd5	190	4516	6470	19.5343	1.05628	1.46068	0.316225	0.944395
NM_183262	Stk35	24	1644	6195	5.56129	0.150005	1.65377	1.01286	0.938877
NM_011112	Papola	205	2425	4509	25.5509	-0.125866	1.62437	1.24629	0.914929
NM_011207	Ptpn3	183	2925	6369	7.9036	1.00881	0.955867	0.85422	0.939631
NM_017374	Ppp2cb	296	1226	1836	39.6436	0.47776	1.70995	0.658195	0.948634
NM_001146690	Chpt1	113	1334	1461	5.32598	1.58122	-1.08016	1.44622	0.649094
NM_145393	Ythdf2	330	2070	4078	15.8492	0.0677859	1.40132	1.29371	0.920941
NM_033320	Glce	6	1863	4626	16.5969	1.36411	1.825	-0.827291	0.787273
NM_130447	Dusp16	713	2696	5112	13.3836	0.3853	1.20702	1.20458	0.932298
NM_153103	Kif1c	370	3673	6764	5.35664	0.142417	1.65033	1.00713	0.933291
NM_018744	Sema6a	669	3765	6894	9.27801	0.93992	0.917618	0.947302	0.934947
NM_175256	Heg1	146	3395	4780	5.16296	0.507961	1.69801	0.637536	0.947837
NM_029930	Tcaf1	141	2910	3738	53.976	0.852953	0.820069	1.07252	0.915182
NM_001164225	Fbxl16	316	1756	3499	99.0771	-0.231324	2.21039	0.658549	0.879205
NM_001025067	Lrig2	227	3392	7174	17.706	0.560036	1.85331	0.365427	0.926259
NM_172626	Rbm27	181	3199	6266	15.0296	0.716917	1.40028	0.700364	0.939187
NM_177561	Usp46	126	1227	3225	73.202	0.318956	2.49715	-0.361115	0.81833
NM_009562	Zfp62	173	2918	3927	15.1868	1.43306	1.24081	-0.016966	0.885634
NM_033618	Supt16	89	3233	4491	27.1132	0.340125	1.19927	1.21184	0.917078
NM_001001182	Baz2b	322	6694	7980	11.6964	0.773818	1.23492	0.769707	0.926149
NM_013823	Kl	110	3155	5118	1.6249	1.48723	-1.62788	1.63352	0.497622
NM_011671	Ucp2	367	1297	1576	1.66745	-3.63869	2.06648	1.5221	-0.0167044
NM_001301364	Hdlbp	224	4031	6264	32.7607	0.769516	1.26988	0.737021	0.925471
NM_001166138	Armc8	253	1453	3629	21.9955	1.16429	1.34612	0.221951	0.910787
NM_027498	Sik3	38	4148	6287	31.1915	0.200043	1.26926	1.24037	0.903224
NM_008651	Mybl1	255	2511	4984	3.90019	0.448298	1.2364	1.06572	0.916806
NM_027901	Gtf3c2	284	3008	4551	11.9437	-0.011433	1.88176	0.813493	0.894607
NM_027427	Taf15	92	1766	2049	1.80221	1.29459	0.752994	0.628388	0.891989
NM_176841	Ccdc88a	176	5714	8862	2.60404	0.107247	1.45097	1.14525	0.901155
NM_024195	Cyb5r4	150	1737	2629	28.6968	0.617778	1.03324	1.07728	0.909435
NM_010832	Msl3	167	1568	3338	9.20021	1.0884	0.688521	0.926279	0.901068
NM_008426	Kcnj3	961	2467	5215	52.9951	0.625998	0.29558	1.59938	0.840321
NM_001081422	Bod1l	147	9246	10540	24.2938	0.77305	1.22683	0.743318	0.914399
NM_011276	Rlim	308	2111	7435	20.2255	1.30018	0.661214	0.683934	0.881777
NM_027526	Rasgef1a	60	1530	3236	38.5736	0.568951	1.61468	0.59874	0.927458
NM_133981	Alg9	160	1996	2778	10.8977	1.19206	1.45153	0.0215308	0.888372
NM_007983	Faf1	401	2351	4429	13.2588	0.736486	1.73981	0.234301	0.903533
NM_172871	Klhl9	506	2360	4217	75.1828	0.137711	1.45669	1.09375	0.896048
NM_001013829	Shf	380	1097	1558	126.311	0.643898	0.632501	1.3518	0.876065
NM_009431	Ctr9	186	3708	4300	13.1151	0.737431	1.45036	0.557715	0.915168
NM_013830	Prpf4b	160	3184	4466	17.5642	1.21508	1.00674	0.435903	0.885906
NM_001115130	Zbtb44	371	1733	8863	12.5625	0.961363	1.37504	0.368745	0.901716
NM_009623	Adcy8	1191	4941	5039	18.6578	0.609075	1.34515	0.79038	0.91487
NM_008071	Gabrb3	103	1525	5568	59.8365	0.380366	1.37756	0.973333	0.910421
NM_175206	Fbxl22	40	751	3935	1.64548	2.57897	0.462469	-3.38824	-0.1156
NM_053201	Magee1	233	2990	3584	29.9823	1.06041	0.623038	0.955146	0.879532
NM_001110228	Celf2	38	1619	7645	21.7978	0.449422	0.954182	1.2445	0.8827
NM_175445	Rassf2	270	1251	4785	5.03363	-0.0726319	1.27223	1.38013	0.859909
NM_010496	Id2	82	487	1272	31.8466	1.21006	0.350983	0.986327	0.849125
NM_178930	Gbf1	245	5831	6401	18.4821	0.524674	1.12784	1.04414	0.898887
NM_001038993	Rnf38	278	1577	4959	6.3032	0.98611	-0.278857	1.57972	0.762323
NM_001039094	Negr1	401	1448	5002	88.3289	0.612261	1.71079	0.337907	0.886988
NM_153402	Ago3	256	2839	7635	3.96546	0.659116	1.48978	0.53875	0.89588
NM_080793	Setd7	266	1367	7356	65.9748	1.37495	0.435347	0.700033	0.836775
NM_008997	Rab11b	224	881	6065	24.6666	-0.350302	1.81886	1.0236	0.83072
NM_172585	Larp4b	338	2564	6073	19.9797	0.324644	1.3651	0.972037	0.88726
NM_172932	Nlgn3	317	2795	3883	37.8943	0.673156	1.43228	0.592796	0.899412
NM_023122	Gpm6b	190	1000	2932	93.8077	0.21315	1.23464	1.1582	0.868664
NM_178076	Mcf2l	83	3611	5253	47.0662	0.336242	1.52913	0.803616	0.889664
NM_008321	Id3	57	417	953	1.57985	-3.60963	1.47075	1.92308	-0.071934
NM_028446	Trip11	343	6274	6448	17.917	1.17115	0.806285	0.622312	0.866581
NM_024277	Rps27a	217	688	726	119.017	0.867145	0.277361	1.31496	0.819822
NM_001081750	Zfp664	991	1777	4078	22.6849	0.436173	1.42195	0.814232	0.890785
NM_012047	Brd7	237	2193	2370	23.5178	-0.313592	1.59781	1.21468	0.832966
NM_172289	Slc36a4	23	1526	1937	21.4686	1.11557	1.17456	0.326442	0.872191
NM_008979	Ptpn22	127	2536	2748	1.55051	0.265511	2.06248	0.191739	0.839909
NM_001081423	Ttll5	235	4222	4841	14.9623	1.01806	1.00148	0.590802	0.870117
NM_026121	Bag4	38	1412	4798	19.7724	0.704404	0.482978	1.31167	0.833018
NM_027497	Epc1	242	2684	3968	17.7766	0.253963	1.45934	0.907153	0.873484
NM_001081080	Phf3	26	6104	7561	26.0454	1.21813	0.431903	0.84087	0.8303
NM_008558	Max	223	706	2005	25.3639	1.07855	1.56656	-0.13389	0.837075
NM_001045536	Zzef1	71	8747	11150	9.9063	0.587928	1.46938	0.574138	0.877148
NM_019647	Rpl21	294	777	1856	53.0819	-0.319219	1.76522	1.01666	0.820886
NM_001001984	Kdm2a	826	4312	7268	21.8205	0.308125	1.49084	0.803588	0.867518
NM_011020	Hspa4l	65	2582	3558	87.7993	1.11559	0.226862	1.076	0.806152
NM_172971	Inpp4a	118	2191	3004	47.6186	0.445011	1.43454	0.715887	0.865147
NM_019945	Mast1	76	4789	4922	25.3089	0.115101	1.28142	1.1044	0.833641
NM_032000	Trps1	440	4286	10204	3.84353	0.423554	1.17675	0.98281	0.861037
NM_172772	Fam63b	128	1934	8081	64.5517	0.994636	0.642411	0.873346	0.836797
NM_001165948	Pogz	175	4378	7615	16.6157	0.50698	1.39789	0.694037	0.866303
NM_001159967	Ralgps2	221	1916	6914	9.58493	0.376473	1.2351	0.949281	0.853617
NM_026872	Ubap2	134	3533	4369	3.43719	-0.0749801	1.31205	1.22679	0.821286
NM_029825	Scfd1	72	1992	2164	15.2466	0.68361	1.39138	0.496421	0.857138
NM_029012	Sppl3	69	1224	2817	40.7799	1.37234	-1.32143	1.49891	0.516608
NM_028627	Psd	213	3288	3900	38.3383	0.644979	1.06085	0.859496	0.855107
NM_027910	Klhdc3	441	1590	2126	64.6705	0.646064	0.55667	1.23518	0.812637
NM_027554	Usp38	470	3599	4685	14.5133	0.268598	1.30375	0.958324	0.843557
NM_019437	Rfk	268	736	2482	16.5257	1.35482	-0.431742	1.16363	0.695569
NM_019791	Maged1	212	2540	2752	80.9622	0.506337	0.807142	1.1623	0.825261
NM_013876	Rnf11	273	738	2132	67.0676	1.19457	0.253157	0.933881	0.79387
NM_009472	Unc5c	150	2946	9298	22.1111	0.619208	1.19278	0.735503	0.849163
NM_024260	Vps50	130	3025	3777	25.6212	0.659575	1.74208	0.0840613	0.828572
NM_025788	Nacc1	196	1741	4304	43.5811	0.694453	1.60805	0.192117	0.83154
NM_138650	Dgkg	458	2825	5506	61.5189	0.630294	1.76881	0.0519594	0.817023
NM_031185	Akap12	190	5245	6247	13.1227	0.853234	0.744242	0.866134	0.821203
NM_010480	Hsp90aa1	144	2346	2850	429.048	0.366494	0.947835	1.143	0.81911
NM_144558	Bivm	433	1942	3571	6.95452	0.716954	0.763044	0.983752	0.82125
NM_172565	Klhl11	54	2184	2436	83.4581	0.103648	1.33071	1.02475	0.819703
NM_178851	Vps39	146	2774	4347	20.1958	0.757408	1.19661	0.556271	0.836761
NM_001171054	Mta3	95	1637	1727	14.4126	0.708287	0.936853	0.845818	0.830319
NM_147219	Abca5	250	5179	8269	14.0818	0.744738	1.08279	0.668408	0.831977
NM_001170967	Wdr33	221	989	1148	18.8642	-0.431066	1.35271	1.37118	0.764274
NM_001163246	Zfp729b	129	3267	4835	4.66644	0.290646	0.965807	1.1622	0.806219
NM_001024931	Rbfox3	586	1528	3007	92.546	1.00264	0.440663	0.948362	0.797221
NM_153319	Amot	0	3381	6958	1.34655	-1.14754	2.24998	0.785689	0.629378
NM_001081141	Gabbr2	289	3112	3998	84.0716	0.693327	1.67446	0.0735007	0.813764
NM_001167887	Suv420h1	705	3357	6071	28.6353	0.141189	1.40934	0.922727	0.824418
NM_133360	Acaca	26	7064	9032	12.149	0.51684	1.21496	0.755957	0.829251
NM_026482	Atp2b1	443	4106	7130	103.102	0.859704	0.733247	0.818684	0.803878
NM_176930	Nrcam	542	4313	7572	37.4717	0.710857	1.19636	0.578585	0.828602
NM_008910	Ppm1a	441	1590	2789	87.8851	0.966284	0.994985	0.469787	0.810352
NM_010508	Ifnar1	129	1902	7014	13.4862	0.127641	1.10052	1.16893	0.79903
NM_207636	Fndc3a	325	3922	6136	9.29247	0.722693	0.999778	0.729998	0.81749
NM_001195500	Dclk2	714	2490	2577	17.5813	0.982377	0.925938	0.525084	0.811133
NM_001039214	Mex3c	339	2298	4080	17.851	0.569658	1.77457	0.0527159	0.798982
NM_001290425	Usp45	58	2356	5863	16.0942	1.65823	0.611562	-0.116605	0.71773
NM_020517	Lenep	11	197	668	1.02507	3.18346	-2.45785	-3.10984	-0.794743
NM_026969	Sec31a	133	3826	4228	30.5442	-0.371283	1.51122	1.14402	0.761318
NM_001080926	Lrp8	154	2767	7296	10.3222	0.712136	1.2	0.544301	0.818811
NM_198602	Cux1	250	2281	3057	53.6823	0.924555	1.14525	0.352982	0.807598
NM_021529	Ppp2r3c	230	1592	2395	10.94	0.0358453	1.87985	0.450089	0.788595
NM_173443	Vcpip1	226	3889	9749	16.864	0.182812	1.11022	1.09016	0.794396
NM_153158	E130308A19Rik	305	2519	3237	3.18909	0.583829	1.39418	0.474274	0.817428
NM_001024910	Sept10	439	1798	1821	1.06833	0.292028	0.808245	1.23674	0.779004
NM_021314	Tacc2	364	3475	3940	26.6963	0.171049	1.16797	1.0556	0.798207
NM_139292	Reep6	86	692	2016	1.82505	-3.68734	2.21073	1.08689	-0.129908
NM_001029878	Lonrf2	0	1557	5077	59.4498	0.253011	1.32492	0.846299	0.808078
NM_001081379	Ankrd11	458	8390	8719	23.185	0.612905	1.4151	0.404919	0.810975
NM_001033261	Zfc3h1	239	6218	6956	4.42193	0.849007	1.4492	0.0711581	0.789787
NM_145491	Rhoq	495	1113	4122	2.37071	0.999568	0.427666	0.904728	0.777321
NM_198122	Arid4b	298	3982	5852	12.3309	0.535835	1.53653	0.359178	0.810515
NM_007552	Bmi1	471	1446	3594	18.107	-0.753296	0.771971	1.85834	0.625671
NM_001029856	Atad5	371	5852	7272	1.29883	0.174907	0.83945	1.27985	0.764735
NM_007595	Camk2b	210	1839	4025	269.687	0.636368	0.863045	0.891592	0.797002
NM_011029	Rpsa	98	986	1861	81.5115	-0.428774	1.77817	0.88582	0.745074
NM_028102	Ddhd2	101	2201	4267	22.0056	0.842114	0.675973	0.829364	0.782484
NM_025877	Slc25a23	190	1594	3362	16.2267	0.364652	1.45458	0.589409	0.802881
NM_027996	Zswim8	297	5796	6073	26.7018	0.541793	0.872117	0.970656	0.794855
NM_009753	Bicd1	445	2953	9667	12.5568	0.0807959	1.57253	0.710593	0.787972
NM_007460	Ap3d1	220	3820	4730	61.5056	0.288507	1.19797	0.906581	0.797684
NM_175434	Slc35f3	207	1473	2784	19.3636	0.418723	1.35161	0.634711	0.801681
NM_182995	Ccp110	295	3310	5009	20.1703	0.729822	0.336269	1.16618	0.74409
NM_001114977	U2surp	135	3225	7736	18.7521	-0.114355	1.22262	1.17361	0.760625
NM_173753	Fnip1	118	3616	6281	26.8915	1.09751	0.935196	0.297201	0.776636
NM_133786	Smc4	124	3985	4082	4.30192	-0.379713	1.2049	1.37035	0.731847
NM_146084	Fam13b	497	3053	3344	35.9642	0.94611	0.199118	1.06426	0.736497
NM_026203	Ahi1	364	3508	4851	16.9389	-0.0845756	1.5591	0.860517	0.778345
NM_009182	St8sia3	789	1932	6280	23.9312	-0.13286	0.847003	1.46494	0.72636
NM_010183	Fbrs	19	1420	2650	6.93099	0.240953	0.550452	1.41481	0.735405
NM_001166416	Med23	113	4244	4946	13.5029	0.321715	1.20134	0.840992	0.788017
NM_026017	Ctdnep1	316	1051	1615	13.1192	1.41288	0.0668764	0.648184	0.709313
NM_027513	Nup205	16	6043	6229	10.3414	0.727794	1.1857	0.452952	0.788816
NM_009103	Rrm1	330	2709	3997	7.53971	1.23907	0.731906	0.279465	0.750146
NM_013791	Mkln1	29	2237	3973	23.9611	0.501516	0.789364	1.02886	0.773247
NM_001081557	Camta1	99	5148	8448	55.2275	0.595463	1.35359	0.4148	0.787952
NM_001015507	Vprbp	124	4384	5392	14.0233	0.42691	0.576042	1.24387	0.748941
NM_008692	Nfyc	220	1228	1970	36.976	0.814126	0.938536	0.582979	0.778547
NM_177806	Prpf39	164	2162	4068	6.37904	0.358513	0.677186	1.21456	0.750086
NM_025730	Lrrk2	57	7641	8230	14.4692	0.495483	0.845606	0.978316	0.773135
NM_009155	Sepp1	89	1232	2030	10.7952	0.880888	1.87837	-0.874132	0.628375
NM_144792	Sgms1	729	1989	3607	8.70786	0.271061	1.36269	0.696628	0.776791
NM_008541	Smad5	287	1685	6585	8.14334	0.742184	0.0338629	1.32308	0.699709
NM_172268	Nup214	114	6372	8195	5.96095	0.484845	0.659009	1.10979	0.751215
NM_178647	Cggbp1	401	905	4320	30.3349	0.920756	0.652014	0.699432	0.757401
NM_172752	Sorbs2	349	3940	6040	1.67843	-1.35314	1.81357	1.15412	0.538184
NM_028841	Tspan17	190	1003	1556	11.661	0.745867	0.997853	0.571981	0.7719
NM_001024526	Larp4	186	2346	6530	12.2764	0.308466	1.80269	0.132029	0.74773
NM_172695	Plaa	222	2607	6815	9.72188	0.291166	2.08682	-0.288733	0.696417
NM_011078	Phf2	120	3411	5260	14.9004	0.918564	1.14345	0.217942	0.759985
NM_175164	Arhgap26	331	2776	7899	32.3753	0.777279	1.13877	0.382801	0.766284
NM_015822	Fbxl3	349	1636	4265	31.5289	-0.452554	1.0114	1.49413	0.684327
NM_177644	Rasal2	657	4518	10046	4.05704	0.651854	1.13604	0.530356	0.772749
NM_001290700	Zfp451	237	1917	2077	18.0166	0.0493758	1.12774	1.0763	0.751136
NM_001145978	Parp4	113	6023	6391	1.00492	0.789337	1.31232	0.152121	0.751259
NM_027139	Taf9	213	1008	1223	38.4463	0.135593	0.840655	1.22444	0.733562
NM_008565	Mcm4	220	2809	3589	3.28002	1.07991	0.472119	0.647035	0.733022
NM_001172096	Cacul1	305	1349	5700	13.0172	1.32582	1.37299	-0.853529	0.615094
NM_001040682	Clmn	125	3191	11869	3.19482	0.850124	1.73067	-0.581447	0.666448
NM_001081222	Esco1	1021	3553	4540	9.86449	1.00439	1.16796	0.03145	0.734598
NM_008549	Man2a1	87	3540	6078	1.9993	-0.390829	1.37803	1.10775	0.698317
NM_029773	Spopl	320	1499	2761	5.80754	-4.31081	1.91415	1.4458	-0.316955
NM_198618	Dlgap3	296	3230	3884	24.564	0.493039	1.18622	0.604114	0.761126
NM_146152	Ipo13	628	3520	3588	24.033	0.84754	0.867576	0.485768	0.733628
NM_007869	Dnajc1	330	1989	5497	2.94486	0.458122	1.44721	0.352521	0.752616
NM_001185164	Vegfb	240	807	1181	3.57656	0.90234	2.28498	-3.84492	-0.219201
NM_001045513	Raph1	201	4002	9117	6.84898	0.392405	1.20572	0.659962	0.752696
NM_001081113	Ipo8	220	3253	5359	17.2318	1.22108	1.09286	-0.235217	0.692907
NM_001123386	Cdyl	463	2098	3492	5.07804	0.185672	0.52956	1.37496	0.696732
NM_175407	Sobp	459	3054	4980	10.8941	0.693064	1.2745	0.25952	0.742361
NM_001008422	Scaf1	176	3947	4177	27.503	0.877445	1.13411	0.175557	0.729038
NM_010199	Fgf12	228	774	5408	42.0105	1.21486	-0.259808	0.977376	0.644141
NM_001163688	Ptpra	287	2669	3501	45.1495	0.0508435	1.4751	0.684257	0.736735
NM_009383	Tial1	357	1536	4292	18.9269	-0.0512377	1.14721	1.07277	0.722914
NM_001170567	Depdc5	166	4942	7944	11.5741	0.89586	1.09209	0.191831	0.726593
NM_028099	Dusp11	132	1098	6435	4.26871	2.03838	0.986423	-3.94899	-0.308062
NM_028315	Dis3	97	2974	3722	5.16856	0.36088	0.287778	1.39729	0.681984
NM_201519	Map4k5	403	2947	4454	11.5285	0.106254	0.944466	1.10286	0.71786
NM_010240	Ftl1	255	807	970	47.3396	-0.4502	1.6469	0.891357	0.696018
NM_001007220	Adam22	206	2780	2856	123.049	0.814023	0.560406	0.771147	0.715192
NM_144922	Hnrnpul1	85	2665	2876	52.3599	0.592808	1.16419	0.481905	0.7463
NM_011035	Pak1	227	1862	3061	307.447	0.560484	0.673139	0.961209	0.731611
NM_001113554	Nudcd1	531	2277	3444	4.90302	1.1098	0.457566	0.563867	0.710411
NM_021423	Shank3	0	5193	7131	18.1064	0.155557	1.16626	0.885838	0.735883
NM_145374	Mios	284	2912	3705	12.3773	0.606085	0.966958	0.651634	0.741559
NM_144847	Nrbp2	237	1014	2496	8.86816	1.95867	1.24093	-4.37908	-0.39316
NM_207692	Mapk9	273	1545	4677	56.3058	0.252019	0.499865	1.32193	0.691273
NM_001040683	Med15	124	2374	3293	15.5819	0.443074	0.80052	0.932878	0.72549
NM_012042	Cul1	321	2652	3157	70.3165	0.0658383	1.31184	0.8028	0.726826
NM_008388	Eif3e	44	1382	1541	46.5091	0.281996	1.28794	0.624431	0.731455
NM_001270988	Asxl2	299	4556	9036	5.83659	0.3151	0.759075	1.05002	0.708067
NM_029818	2700049A03Rik	992	5291	5499	3.75317	-0.461239	1.50103	1.00609	0.68196
NM_001177780	Dlg3	146	1247	3332	22.9048	0.529726	0.929473	0.737381	0.732193
NM_001039090	Skil	728	2618	6928	16.2424	0.672253	1.02511	0.481925	0.726429
NM_007585	Anxa2	74	1094	1374	1.33971	0.584084	2.3972	-3.26731	-0.0953397
NM_020256	Zbtb33	292	2308	5122	12.4379	-0.0140786	1.10525	1.03123	0.707465
NM_144846	Fam49b	303	1278	3800	52.539	1.48029	1.34348	-1.57564	0.416044
NM_053141	Pcdhb16	221	2630	5271	7.53261	-0.000895318	1.2994	0.846903	0.715136
NM_212438	Wiz	58	2929	3903	4.23582	0.793013	1.00495	0.347447	0.715136
NM_001042488	Dlgap4	596	1454	2914	12.1804	1.22964	1.21377	-0.531373	0.637346
NM_145528	Atg13	359	1799	3573	21.2515	0.182824	1.24293	0.716124	0.713959
NM_008981	Ptprg	695	5024	9190	8.65495	1.40062	-0.221323	0.656568	0.611956
NM_001163262	Cmip	83	2405	4529	10.3907	0.29395	1.14365	0.71075	0.716116
NM_146234	Mmgt1	56	452	4084	12.6972	1.73777	1.56531	-4.59021	-0.429042
NM_175556	Plch2	0	3717	5584	48.3531	0.246424	1.27406	0.629998	0.716829
NM_009011	Rad23b	320	1571	3811	50.6315	-0.0817879	0.230268	1.67147	0.60665
NM_011880	Rgs7	331	1741	2409	24.3031	0.140929	-0.27323	1.80507	0.557591
NM_001290634	Ugp2	267	1761	2657	9.77164	0.963225	-0.765248	1.38307	0.527017
NM_017475	Rragc	101	1298	2606	31.8043	-0.35265	1.37338	1.00864	0.676457
NM_011774	Slc30a4	243	1536	5482	22.3359	1.04833	0.491501	0.520268	0.6867
NM_177088	Cep95	107	2591	2727	3.04535	1.17962	1.06546	-0.24957	0.665173
NM_001081306	Ptprz1	325	7264	8068	4.01897	0.548144	1.18092	0.427113	0.718727
NM_001004177	Celsr2	0	8754	10401	27.2414	-0.052293	1.14771	1.00181	0.699077
NM_178407	Arap2	426	5538	7363	7.77452	1.0121	0.41582	0.617324	0.681749
NM_016774	Atp5b	20	1610	1879	1245.3	0.584279	1.12726	0.441666	0.717734
NM_145958	Kbtbd2	643	2515	3868	32.8976	0.791344	1.20878	0.0805696	0.693565
NM_019743	Rybp	81	768	4376	17.9891	1.34028	-0.0406243	0.559918	0.619857
NM_028898	Rptor	905	4913	7022	27.7211	-0.437137	1.22162	1.15337	0.645949
NM_001161839	Ptprr	166	1405	2508	27.6661	0.672676	0.636507	0.77785	0.695678
NM_001163637	Jakmip2	471	2934	3511	29.9689	0.445728	1.10794	0.587577	0.713748
NM_027490	Dcp2	134	1403	8643	21.849	0.765304	0.755231	0.560263	0.6936
NM_133658	Ercc3	63	2415	2673	19.218	-1.05578	2.27025	0.330503	0.514991
NM_007569	Btg1	324	840	5010	57.6096	-0.458656	0.616735	1.61012	0.589401
NM_001038621	Rabgap1l	183	1296	6338	35.5401	0.277463	0.406251	1.27067	0.651463
NM_001252533	Cacnb2	164	1982	3814	1.91622	-0.442471	1.33108	1.05821	0.648942
NM_145514	Wdr26	541	2467	7047	22.0534	-0.256665	1.33991	0.952869	0.678706
NM_001081278	Tbc1d4	731	4463	6641	8.47855	0.0408381	1.17605	0.882766	0.699886
NM_001198787	Aatk	138	4092	5183	78.1773	-0.101528	1.41142	0.755706	0.688532
NM_144859	Pja2	175	2113	4520	113.946	0.264865	1.17175	0.678315	0.704976
NM_138599	Tomm70a	148	1984	3778	82.5187	0.838605	0.80027	0.415624	0.684833
NM_001198861	Ctbp1	412	1705	2482	136.407	1.33676	0.316865	0.263239	0.638956
NM_001080548	Usp6nl	286	2746	4824	6.59889	0.455199	1.67702	-0.105474	0.675581
NM_016843	Atxn10	84	1512	2425	67.3127	-0.426087	1.50656	0.898004	0.659494
NM_001256082	Myo7a	122	6641	7214	2.69989	0.115526	1.85118	0.0142343	0.660313
NM_001285901	Eri3	62	842	1316	40.7288	1.13201	-0.169305	0.896066	0.61959
NM_173002	Zxdc	165	2742	4122	10.5121	0.944726	-0.0142134	0.968632	0.633048
NM_029078	Pcf11	292	4954	5804	17.6737	0.702714	1.11518	0.267188	0.695028
NM_001015099	G2e3	219	2370	6634	2.16066	1.25021	1.27353	-0.840027	0.561236
NM_001290633	Reps2	151	2095	7686	17.3138	0.597206	0.290924	1.08178	0.656637
NM_007760	Crat	410	2291	4393	5.71002	-1.07972	1.57313	1.10375	0.53239
NM_153124	St8sia5	248	1379	1995	125.006	0.313866	0.682128	1.02228	0.672758
NM_026165	Slc25a46	91	1348	4371	27.9422	0.968449	0.609254	0.429274	0.668993
NM_183020	Atxn2l	110	3260	3718	13.8284	0.507379	1.25509	0.325035	0.695835
NM_198932	Pou2f1	12	2322	12906	3.1503	0.529183	1.14824	0.420235	0.69922
NM_173012	Letm2	405	1848	2100	2.24062	-3.79783	1.24091	1.71453	-0.280798
NM_001166381	Rad52	145	1408	1698	5.39017	-0.474022	0.448235	1.71231	0.562174
[truncated: 9,155 more rows]

## Sheet: Granule Cell Targets
Stringent Targets			High Binding Targets			Low Binding Targets
[truncated: 1,144 more rows]

[truncated: 2 more sheets: Enriched CA1, Enriched Granule Cell]
