# Supplementary material for: FMRP has a cell-type-specific role in CA1 pyramidal neurons to regulate autism-related transcripts and circadian memory
Source: eLife. 2019 Dec 20;8:e46919. doi: 10.7554/eLife.46919 (PMC6924960; doi:10.7554/eLife.46919)
Supplement: Supplementary file 3. — Results from Fmr1 KO vs WT TRAP. Raw counts per gene and statistics from DESeq2 analysis of differential expression between WT and KO are shown. Sawicka CA1 Fmr1 KO TRAP DESeq2. CA1 TRAP data from RiboTagCamk2a-Cre P28-P31 mice presented in this study. Ceolin CA1 Fmr1 KO TRAP DESeq2. CA1 TRAP data from RiboTagWfs1-CreERT22–6 month old mice published by Ceolin et al. (2017). Downloaded from GSE94559. Granule Fmr1 KO TRAP DESeq2. Cerebellar granule cell TRAP data from RiboTagNeurod1-Cre6–8 week mice presented in this study. [file elife-46919-supp3.xlsx]

## Sheet: Sawicka CA1 Fmr1 KO TRAP DESeq2
Ensembl Gene	Gene Symbol	WT TRAP Rep1 counts	WT TRAP Rep2 counts	WT TRAP Rep3 counts	KO TRAP Rep1 counts	KO TRAP Rep2 counts	KO TRAP Rep3 counts	baseMean	log2FoldChange	lfcSE	stat	pvalue	padj
ENSMUSG00000000838	Fmr1	805	1211	1633	120	136	231	666.757	-1.33977	0.0675693	-20.1642	2.01972e-90	3.41797e-86
ENSMUSG00000034275	Igsf9b	1529	1602	2245	1123	885	1905	1506.74	-0.316006	0.0667752	-4.72559	2.29445e-06	0.012943
ENSMUSG00000026991	Pkp4	1980	2925	3379	1639	1556	2870	2314.14	-0.313692	0.0656631	-4.78013	1.75178e-06	0.012943
ENSMUSG00000026452	Syt2	475	577	688	342	288	511	471.571	-0.305619	0.0673547	-4.54398	5.52022e-06	0.0233547
ENSMUSG00000068284	Usf3	765	1062	1143	696	482	996	836.729	-0.251005	0.0675572	-3.75214	0.000175331	0.593426
ENSMUSG00000047388	Atmin	746	1083	1131	632	530	1037	836.509	-0.248992	0.0675921	-3.69006	0.000224203	0.632364
ENSMUSG00000050600	Zfp831	901	1231	1295	804	675	1136	989.758	-0.24221	0.0672582	-3.60519	0.000311926	0.754105
ENSMUSG00000070348	Ccnd1	474	792	699	403	429	597	557.234	-0.233182	0.0675409	-3.43856	0.000584809	0.99983
ENSMUSG00000058230	Arhgap35	4087	6666	7009	3894	3844	6608	5185.35	-0.226676	0.0647297	-3.49637	0.000471633	0.99768
ENSMUSG00000046138	9930021J03Rik	413	592	677	364	284	595	471.781	-0.219115	0.0670019	-3.28953	0.00100356	0.99983
ENSMUSG00000029167	Ppargc1a	409	673	704	363	330	648	502.66	-0.207755	0.0670988	-3.09529	0.0019662	0.99983
ENSMUSG00000020866	Cacna1g	738	1184	912	735	595	846	832.637	-0.198104	0.0675794	-2.93092	0.00337958	0.99983
ENSMUSG00000038256	Bcl9	423	656	524	389	296	491	459.329	-0.197652	0.0663562	-2.97286	0.00295038	0.99983
ENSMUSG00000036907	C1ql2	468	579	946	378	402	751	561.695	-0.197003	0.0674105	-2.92223	0.00347539	0.99983
ENSMUSG00000058897	Col25a1	946	1406	1768	860	908	1615	1203	-0.193389	0.0667389	-2.90053	0.00372529	0.99983
ENSMUSG00000033960	Jcad	1233	1858	1831	1290	998	1700	1457.88	-0.189157	0.0672879	-2.82924	0.00466588	0.99983
ENSMUSG00000020647	Ncoa1	2173	3882	3366	2409	1924	3187	2766.49	-0.184939	0.0674749	-2.7418	0.0061104	0.99983
ENSMUSG00000037679	Inf2	701	1132	786	670	571	790	775.789	-0.18473	0.0675101	-2.70032	0.00692737	0.99983
ENSMUSG00000049176	Frmpd4	2353	3737	3994	2422	2043	3972	2983.25	-0.18317	0.0666337	-2.75062	0.00594822	0.99983
ENSMUSG00000041415	Dicer1	509	779	894	485	441	824	632.877	-0.182423	0.0675844	-2.69861	0.00696293	0.99983
ENSMUSG00000035529	Prdm4	273	404	454	215	217	424	319.314	-0.180607	0.0656484	-2.7632	0.0057237	0.99983
ENSMUSG00000025571	Tnrc6c	977	1261	1592	971	779	1445	1138.96	-0.179687	0.0669224	-2.69601	0.00701758	0.99983
ENSMUSG00000054280	Prr14l	1669	2344	2498	1628	1327	2557	1950.89	-0.177544	0.0667972	-2.66232	0.00776036	0.99983
ENSMUSG00000042388	Dlgap3	1209	1642	1671	1257	983	1510	1365.36	-0.177541	0.0668409	-2.68171	0.00732471	0.99983
ENSMUSG00000026664	Phyh	404	662	707	401	299	675	504.297	-0.176899	0.0663729	-2.6849	0.00725508	0.99983
ENSMUSG00000038369	Ncoa6	530	883	741	572	386	678	622.817	-0.176063	0.0664411	-2.68663	0.0072177	0.99983
ENSMUSG00000018076	Med13l	1158	1865	1836	1254	1061	1661	1444.13	-0.175746	0.067162	-2.6258	0.00864453	0.99983
ENSMUSG00000021366	Hivep1	365	639	506	348	249	511	426.372	-0.173918	0.0643156	-2.70089	0.00691552	0.99983
ENSMUSG00000024008	Cpne5	280	444	358	247	209	344	309.914	-0.17232	0.0648794	-2.63187	0.00849156	0.99983
ENSMUSG00000022883	Robo1	607	1138	1141	657	580	1066	833.678	-0.171029	0.0675265	-2.50906	0.0121054	0.99983
ENSMUSG00000019986	Ahi1	2415	3674	4581	2335	2361	4542	3177.33	-0.171021	0.0648933	-2.63976	0.00829646	0.99983
ENSMUSG00000041444	Arhgap32	4491	5898	6779	4645	3646	6618	5225.78	-0.169009	0.0645502	-2.62899	0.00856396	0.99983
ENSMUSG00000028782	Adgrb2	5953	7664	8542	5945	5141	8168	6795.14	-0.168154	0.0633496	-2.65576	0.00791302	0.99983
ENSMUSG00000021091	Serpina3n	934	1179	1831	940	770	1638	1162.2	-0.167001	0.0668595	-2.49895	0.012456	0.99983
ENSMUSG00000031343	Gabra3	638	1144	1184	609	700	1148	871.661	-0.166185	0.0674	-2.45561	0.0140645	0.99983
ENSMUSG00000038970	Lmtk2	4238	4988	5597	4111	3410	5416	4579.16	-0.164914	0.0639539	-2.57243	0.0100987	0.99983
ENSMUSG00000058153	Sez6l	3012	4856	4375	3289	2673	4348	3695.5	-0.163873	0.0667135	-2.46091	0.0138584	0.99983
ENSMUSG00000040712	Camta2	2659	4875	3921	3176	2260	3768	3388.5	-0.161914	0.0675565	-2.42037	0.0155046	0.99983
ENSMUSG00000036792	Mbd5	756	1245	1112	727	641	1198	921.299	-0.161914	0.0675368	-2.38356	0.0171462	0.99983
ENSMUSG00000051331	Cacna1c	1375	2420	2369	1482	1385	2314	1836.08	-0.160499	0.066903	-2.38361	0.0171436	0.99983
ENSMUSG00000034755	Pcdh11x	168	242	290	137	119	254	194.005	-0.159585	0.0620554	-2.58924	0.00961889	0.99983
ENSMUSG00000053199	Arhgap20	1465	2071	2464	1623	1117	2388	1794.12	-0.158728	0.0673444	-2.39374	0.0166774	0.99983
ENSMUSG00000026872	Zeb2	4104	5986	7388	4367	3630	7316	5258.31	-0.158712	0.0650808	-2.44414	0.0145199	0.99983
ENSMUSG00000025262	Fam120c	742	1212	1247	700	667	1335	946.547	-0.158486	0.067591	-2.34663	0.0189442	0.99983
ENSMUSG00000031563	Wwc2	639	925	968	692	561	823	758.42	-0.15759	0.0675891	-2.36478	0.0180409	0.99983
ENSMUSG00000029406	Pitpnm2	1423	2358	2267	1566	1327	2200	1814.54	-0.157013	0.0671014	-2.33954	0.0193077	0.99983
ENSMUSG00000031617	Tmem184c	452	603	916	447	359	848	573.783	-0.156604	0.0675527	-2.32986	0.0198137	0.99983
ENSMUSG00000029361	Nos1	1784	2471	2531	1717	1475	2709	2065.6	-0.156494	0.0666682	-2.34192	0.0191846	0.99983
ENSMUSG00000047146	Tet1	158	214	248	135	102	204	172.152	-0.156257	0.0609152	-2.58978	0.00960367	0.99983
ENSMUSG00000071862	Lrrtm2	754	1241	1360	796	695	1335	992.562	-0.155098	0.0675265	-2.29189	0.021912	0.99983
ENSMUSG00000047907	Tshz2	149	216	205	125	95	173	157.918	-0.154993	0.0595405	-2.61527	0.00891579	0.99983
ENSMUSG00000021767	Kat6b	489	705	726	428	409	761	569.879	-0.154372	0.0673771	-2.28847	0.0221099	0.99983
ENSMUSG00000073643	Wdfy1	485	506	869	566	302	571	538.383	-0.154176	0.0660795	-2.47076	0.0134826	0.99983
ENSMUSG00000068735	Trp53i11	166	299	304	139	160	271	215.145	-0.153459	0.0632205	-2.4171	0.0156445	0.99983
ENSMUSG00000034472	Rasd2	486	785	699	487	457	669	588.687	-0.152466	0.0675419	-2.24646	0.0246746	0.99983
ENSMUSG00000041120	Nbl1	213	369	361	217	168	322	266.759	-0.151145	0.0635806	-2.3794	0.0173409	0.99983
ENSMUSG00000022103	Gfra2	357	532	534	348	276	527	418.262	-0.150524	0.0665242	-2.26851	0.0232981	0.99983
ENSMUSG00000032036	Kirrel3	383	856	695	391	426	720	558.047	-0.15044	0.0668288	-2.18769	0.0286924	0.99983
ENSMUSG00000022623	Shank3	715	1303	910	784	631	929	872.546	-0.150421	0.0672723	-2.21195	0.0269699	0.99983
ENSMUSG00000033769	Exoc6b	2259	2770	3273	2391	1738	3192	2554.15	-0.150068	0.0655829	-2.30904	0.0209412	0.99983
ENSMUSG00000022521	Crebbp	1776	2651	2390	1918	1343	2543	2066.77	-0.149919	0.0675654	-2.23828	0.0252031	0.99983
ENSMUSG00000043671	Dpy19l3	831	1171	1217	828	670	1263	972.455	-0.149411	0.0675194	-2.21628	0.0266724	0.99983
ENSMUSG00000028634	Hivep3	530	925	721	554	375	782	633.417	-0.149239	0.0652351	-2.29025	0.0220067	0.99983
ENSMUSG00000075270	Pde11a	214	354	378	196	172	365	268.602	-0.149013	0.0641218	-2.32818	0.0199026	0.99983
ENSMUSG00000028064	Sema4a	193	315	299	176	152	278	229.346	-0.14873	0.0631064	-2.34909	0.0188192	0.99983
ENSMUSG00000028434	Epb41l4b	216	379	314	200	190	299	261.382	-0.148261	0.06417	-2.28022	0.0225944	0.99983
ENSMUSG00000031065	Cdk16	789	1243	1164	841	620	1215	954.59	-0.147936	0.0674704	-2.20443	0.0274944	0.99983
ENSMUSG00000017400	Stac2	157	313	176	153	78	159	171.829	-0.146512	0.0537574	-2.7426	0.00609544	0.99983
ENSMUSG00000040003	Magi2	1078	1487	1561	1076	870	1644	1255.18	-0.146497	0.0672782	-2.18003	0.0292555	0.99983
ENSMUSG00000060657	Marf1	1291	2057	2579	1363	1226	2623	1767.76	-0.144702	0.0667115	-2.16848	0.0301221	0.99983
ENSMUSG00000027520	Zdbf2	765	1285	1202	771	748	1250	977.378	-0.144407	0.0674946	-2.12415	0.0336576	0.99983
ENSMUSG00000016664	Pacsin2	463	598	693	433	379	668	526.621	-0.144027	0.0675074	-2.13351	0.0328827	0.99983
ENSMUSG00000037419	Endod1	878	1222	1518	906	762	1484	1089.58	-0.143918	0.0671016	-2.1509	0.031484	0.99983
ENSMUSG00000058420	Syt17	533	946	1076	597	572	953	751.513	-0.143441	0.0675922	-2.09854	0.0358575	0.99983
ENSMUSG00000030930	Chst15	617	824	1039	581	542	1019	744.412	-0.142862	0.0675221	-2.1185	0.0341328	0.99983
ENSMUSG00000004151	Etv1	1698	2885	3296	2027	1375	3327	2324.05	-0.142253	0.0675375	-2.13507	0.0327549	0.99983
ENSMUSG00000021140	Pcnx	2200	3403	3589	2480	2069	3446	2797.12	-0.141761	0.0661948	-2.15047	0.0315183	0.99983
ENSMUSG00000026490	Cdc42bpa	3480	4677	6056	3550	3146	6070	4336.15	-0.1414	0.0641269	-2.20725	0.0272963	0.99983
ENSMUSG00000045573	Penk	189	219	253	170	106	224	190.318	-0.141256	0.0616915	-2.33594	0.0194942	0.99983
ENSMUSG00000027270	Lamp5	124	216	193	124	78	152	144.715	-0.14113	0.0565934	-2.53874	0.0111252	0.99983
ENSMUSG00000066129	Kndc1	1277	1731	1782	1221	1060	1942	1468.23	-0.140768	0.0670849	-2.09051	0.0365718	0.99983
ENSMUSG00000029050	Ski	1240	1943	1967	1341	1157	1968	1563.61	-0.14066	0.0669192	-2.10161	0.0355876	0.99983
ENSMUSG00000035735	Dagla	1531	2288	2117	1642	1323	2195	1820.78	-0.139819	0.0669935	-2.08971	0.036644	0.99983
ENSMUSG00000025189	Cnnm1	813	1335	1333	826	818	1360	1050.6	-0.139663	0.0672633	-2.06596	0.0388322	0.99983
ENSMUSG00000062785	Kcnc3	543	692	668	548	407	656	582.441	-0.139611	0.0675278	-2.0799	0.0375343	0.99983
ENSMUSG00000037138	Aff3	1007	1404	1472	1142	740	1457	1179.01	-0.139584	0.0675925	-2.11839	0.0341418	0.99983
ENSMUSG00000031626	Sorbs2	602	1045	1081	677	518	1092	804.085	-0.139262	0.0672537	-2.07417	0.0380631	0.99983
ENSMUSG00000021684	Pde8b	809	1159	1299	811	708	1334	988.978	-0.139182	0.0673523	-2.06857	0.038586	0.99983
ENSMUSG00000025089	Gfra1	473	660	931	407	486	858	608.638	-0.138567	0.0675316	-2.0707	0.0383872	0.99983
ENSMUSG00000060206	Zfp462	808	1182	1224	874	675	1219	974.618	-0.138526	0.0675367	-2.06567	0.0388595	0.99983
ENSMUSG00000022240	Ctnnd2	2260	3638	3439	2521	2164	3439	2854.73	-0.138457	0.0663476	-2.08804	0.0367946	0.99983
ENSMUSG00000079481	Nhsl2	1246	2068	2077	1402	1121	2123	1621.91	-0.138276	0.0674839	-2.05096	0.0402706	0.99983
ENSMUSG00000029673	Auts2	544	1096	836	641	496	837	726.33	-0.137961	0.0663426	-2.05259	0.0401127	0.99983
ENSMUSG00000037674	Rfx7	265	455	443	268	220	442	337.046	-0.13786	0.0650532	-2.11395	0.0345194	0.99983
ENSMUSG00000005125	Ndrg1	351	621	645	329	394	625	477.229	-0.137718	0.0673708	-2.03743	0.0416069	0.99983
ENSMUSG00000005774	Rfx5	89	133	169	68	66	121	103.718	-0.137634	0.0550117	-2.51147	0.0120228	0.99983
ENSMUSG00000024517	Grp	351	391	596	322	284	489	394.58	-0.137515	0.0666704	-2.05881	0.039512	0.99983
ENSMUSG00000039137	Whrn	117	180	133	95	64	120	117.447	-0.137313	0.054419	-2.51625	0.0118612	0.99983
ENSMUSG00000039621	Prex1	932	1594	1385	951	993	1419	1191.43	-0.137291	0.0670405	-2.03004	0.0423527	0.99983
ENSMUSG00000020886	Dlg4	4588	7449	6649	5225	4170	6853	5722.72	-0.137281	0.066704	-2.06379	0.0390379	0.99983
ENSMUSG00000035033	Tbr1	299	588	450	318	244	472	384.797	-0.137122	0.0638078	-2.11491	0.0344372	0.99983
ENSMUSG00000049470	Aff4	4643	7054	8258	4769	4678	8495	6088.3	-0.136501	0.0639392	-2.13473	0.0327831	0.99983
ENSMUSG00000026116	Tmem131	703	1223	1297	855	612	1220	951.202	-0.136348	0.0672933	-2.04326	0.0410267	0.99983
ENSMUSG00000024622	Hmgxb3	755	984	1161	708	571	1287	878.133	-0.136127	0.0675922	-2.02994	0.0423622	0.99983
ENSMUSG00000029512	Ulk1	605	1069	880	647	543	938	763.68	-0.136004	0.067288	-1.99838	0.045675	0.99983
ENSMUSG00000003352	Cacnb3	887	1540	1341	948	824	1441	1135.02	-0.135734	0.0675925	-1.98931	0.0466673	0.99983
ENSMUSG00000021217	Tshz3	350	482	506	363	267	476	400.081	-0.13544	0.0666234	-2.05777	0.0396127	0.99983
ENSMUSG00000018427	Ypel2	311	466	502	346	252	435	377.257	-0.135362	0.0660784	-2.08533	0.0370392	0.99983
ENSMUSG00000025224	Gbf1	1128	1592	1729	1164	1052	1693	1364.17	-0.135259	0.0664936	-2.03553	0.0417973	0.99983
ENSMUSG00000027971	Ndst4	1104	1336	2213	1121	934	2092	1395.59	-0.13511	0.0664057	-2.03335	0.0420169	0.99983
ENSMUSG00000000805	Car4	54	108	98	25	49	61	64.0044	-0.135031	0.0471406	-2.94875	0.00319061	0.99983
ENSMUSG00000039831	Arhgap29	116	139	156	78	62	141	112.443	-0.135019	0.0550081	-2.47694	0.0132514	0.99983
ENSMUSG00000059890	Ube4a	651	957	1003	671	561	1027	790.552	-0.134499	0.067583	-1.99246	0.0463204	0.99983
ENSMUSG00000022100	Xpo7	963	1489	1634	1045	871	1656	1235.05	-0.134369	0.0673162	-1.99911	0.0455968	0.99983
ENSMUSG00000034247	Plekhm1	155	326	208	141	134	217	193.341	-0.134233	0.059639	-2.15931	0.0308263	0.99983
ENSMUSG00000025475	Adgra1	570	1067	928	621	513	1001	758.195	-0.134026	0.0669267	-1.98	0.0477036	0.99983
ENSMUSG00000022416	Cacna1i	1356	1671	1657	1397	1069	1682	1464.85	-0.133814	0.0665371	-2.0158	0.0438206	0.99983
ENSMUSG00000090100	Ttbk2	1278	1725	2325	1369	1098	2291	1614.95	-0.133525	0.066416	-2.01949	0.0434367	0.99983
ENSMUSG00000030583	Sipa1l3	1465	2318	1739	1677	1086	1886	1684.55	-0.133387	0.0673703	-2.00569	0.0448895	0.99983
ENSMUSG00000063455	D630045J12Rik	747	842	924	699	513	1002	775.938	-0.133324	0.0675916	-1.96194	0.0497697	0.99983
ENSMUSG00000022197	Pdzd2	716	673	924	686	415	962	715.02	-0.132987	0.0675902	-1.98156	0.0475289	0.99983
ENSMUSG00000016382	Pls3	2986	4875	5505	3428	3127	5172	4053.95	-0.132954	0.0655356	-2.02326	0.0430463	0.99983
ENSMUSG00000040128	Pnrc1	297	615	533	355	281	495	416.694	-0.132671	0.0648805	-2.01398	0.044012	0.99983
ENSMUSG00000042700	Sipa1l1	2529	3701	3719	2796	2098	3929	3057.72	-0.132414	0.0668726	-1.99497	0.0460461	0.99983
ENSMUSG00000022231	Sema5a	988	1777	2440	1069	1114	2434	1536.38	-0.13171	0.0666524	-1.95373	0.0507337	0.99983
ENSMUSG00000039262	Prrc2b	5050	7662	6761	5763	4312	7042	6027.65	-0.131658	0.0666812	-1.99241	0.0463257	0.99983
ENSMUSG00000074305	Peak1	496	821	756	574	390	750	616.709	-0.131289	0.0664956	-2.00488	0.0449755	0.99983
ENSMUSG00000035566	Pcdh17	1490	2428	2854	1686	1557	2698	2044.48	-0.130597	0.0662923	-1.96018	0.0499747	0.99983
ENSMUSG00000025885	Myo5b	984	1596	1989	1023	1079	1932	1373.1	-0.130172	0.0664446	-1.95098	0.0510599	0.99983
ENSMUSG00000070576	Mn1	861	1197	1278	920	729	1279	1022.49	-0.13008	0.0673399	-1.94336	0.0519726	0.99983
ENSMUSG00000063415	Cyp26b1	127	232	289	118	114	262	179.402	-0.130025	0.0610116	-2.12594	0.0335084	0.99983
ENSMUSG00000026821	Ralgds	602	1025	972	622	606	1008	783.981	-0.129958	0.0675859	-1.90653	0.0565816	0.99983
ENSMUSG00000039057	Myo16	460	722	723	472	446	703	574.754	-0.129952	0.067554	-1.91732	0.0551977	0.99983
ENSMUSG00000016763	Scube1	223	375	348	235	213	297	277.779	-0.129894	0.0649223	-2.0035	0.0451233	0.99983
ENSMUSG00000030854	Ptpn5	634	1050	878	677	595	908	779.465	-0.129411	0.067585	-1.89943	0.0575076	0.99983
ENSMUSG00000031565	Fgfr1	838	1354	1241	897	833	1246	1050.42	-0.128854	0.0672875	-1.90727	0.0564854	0.99983
ENSMUSG00000026833	Olfm1	4772	7876	8316	5364	4614	8722	6383.77	-0.128831	0.0661344	-1.94371	0.0519304	0.99983
ENSMUSG00000048388	Fam171b	3759	5345	6898	4170	3259	7108	4877.59	-0.128522	0.0656127	-1.97098	0.0487261	0.99983
ENSMUSG00000052684	Jun	507	852	836	518	572	781	664.076	-0.128002	0.0675773	-1.88781	0.0590514	0.99983
ENSMUSG00000035168	Tanc1	1772	2395	2750	1950	1546	2690	2135.61	-0.127324	0.0659389	-1.94615	0.0516367	0.99983
ENSMUSG00000005886	Ncoa2	1544	2274	2423	1741	1331	2463	1913.09	-0.127322	0.0669952	-1.91718	0.0552152	0.99983
ENSMUSG00000042772	Smg7	1271	2167	2389	1417	1305	2424	1759.04	-0.127093	0.0668506	-1.88851	0.0589576	0.99983
ENSMUSG00000006930	Hap1	1534	1985	2642	1364	1580	2518	1877.7	-0.126812	0.0669267	-1.90808	0.0563802	0.99983
ENSMUSG00000040423	Rc3h1	647	1010	1152	676	629	1158	847.526	-0.126781	0.067474	-1.87515	0.0607723	0.99983
ENSMUSG00000008734	Gprc5b	415	659	763	415	453	695	549.428	-0.126446	0.0675519	-1.86699	0.0619029	0.99983
ENSMUSG00000026463	Atp2b4	2696	3372	3584	2711	2215	3842	3021.53	-0.126339	0.0653875	-1.92424	0.0543248	0.99983
ENSMUSG00000064023	Klk8	181	177	234	117	138	178	170.271	-0.126284	0.0588307	-2.13738	0.0325674	0.99983
ENSMUSG00000037989	Wnk2	741	1124	829	801	635	862	835.118	-0.126193	0.0675905	-1.86219	0.0625765	0.99983
ENSMUSG00000044349	Snhg11	299	711	516	300	378	561	447.03	-0.12617	0.0664195	-1.82423	0.0681174	0.99983
ENSMUSG00000035311	Gnptab	644	1157	982	693	572	1100	833.326	-0.125824	0.0671128	-1.85382	0.0637656	0.99983
ENSMUSG00000005442	Cic	986	1500	1196	1095	852	1234	1141.18	-0.125737	0.0675237	-1.8698	0.0615122	0.99983
ENSMUSG00000037705	Tecta	87	79	92	43	39	68	68.1559	-0.125541	0.0477828	-2.60037	0.00931231	0.99983
ENSMUSG00000034940	Synrg	1145	1744	1740	1237	1051	1807	1420.81	-0.125416	0.0670672	-1.86976	0.0615168	0.99983
ENSMUSG00000022441	Efcab6	159	210	282	140	128	239	186.408	-0.125388	0.0621759	-2.02129	0.0432502	0.99983
ENSMUSG00000062760	Shisal1	314	509	526	302	323	509	402.465	-0.125267	0.0669942	-1.86135	0.0626952	0.99983
ENSMUSG00000039257	Vstm2b	220	337	409	211	211	367	282.158	-0.125235	0.0654599	-1.90838	0.0563416	0.99983
ENSMUSG00000020770	Unk	153	214	218	152	112	174	168.838	-0.125226	0.0606202	-2.10688	0.0351284	0.99983
ENSMUSG00000033615	Cplx1	895	1653	1526	1114	813	1507	1216.28	-0.125207	0.067301	-1.86778	0.0617932	0.99983
ENSMUSG00000066113	Adamtsl1	237	421	386	200	291	356	309.14	-0.124967	0.0657198	-1.91803	0.0551073	0.99983
ENSMUSG00000032966	Fkbp1a	2164	4264	3447	2695	2028	3612	2961.1	-0.124765	0.0674649	-1.83505	0.0664976	0.99983
ENSMUSG00000026482	Rgl1	1512	2101	2404	1678	1333	2370	1853.18	-0.124544	0.0663554	-1.89121	0.0585962	0.99983
ENSMUSG00000070639	Lrrc8b	1236	1825	2080	1332	1052	2234	1566.67	-0.124408	0.0672786	-1.86155	0.0626665	0.99983
ENSMUSG00000030337	Vamp1	587	820	975	675	518	849	721.947	-0.124309	0.0675845	-1.8738	0.0609586	0.99983
ENSMUSG00000026437	Cdk18	94	242	211	110	105	158	147.996	-0.124261	0.0571094	-2.0811	0.0374251	0.99983
ENSMUSG00000026743	Mllt10	206	306	336	194	187	303	248.984	-0.124008	0.064629	-1.91656	0.0552937	0.99983
ENSMUSG00000039579	Grin3a	575	1043	1098	610	629	1125	813.284	-0.123963	0.0675625	-1.81495	0.0695316	0.99983
ENSMUSG00000036591	Arhgap21	1335	1962	2094	1529	1021	2232	1643.7	-0.123797	0.0675916	-1.87135	0.0612967	0.99983
ENSMUSG00000038244	Mical2	4898	8940	7373	5552	4962	8066	6488.95	-0.123672	0.0669589	-1.82197	0.0684599	0.99983
ENSMUSG00000028433	Ubap2	101	178	174	111	61	126	122.055	-0.123476	0.0536939	-2.38866	0.0169099	0.99983
ENSMUSG00000022037	Clu	907	1724	1670	1031	1008	1696	1294.53	-0.123336	0.0673865	-1.80005	0.0718523	0.99983
ENSMUSG00000011877	Git1	2176	3713	3189	2497	2135	3321	2791.14	-0.123204	0.0669471	-1.83343	0.066739	0.99983
ENSMUSG00000035133	Arhgap5	1798	2954	3835	1899	1915	3992	2589.3	-0.123119	0.065546	-1.87639	0.0606017	0.99983
ENSMUSG00000026158	Ogfrl1	948	1443	1953	1011	905	2001	1306.54	-0.123067	0.0669325	-1.84049	0.0656962	0.99983
ENSMUSG00000037624	Kcnk2	277	349	413	265	243	344	311.363	-0.122805	0.0658253	-1.87994	0.0601157	0.99983
ENSMUSG00000022498	Txndc11	253	379	384	226	255	354	303.182	-0.122708	0.0658097	-1.86331	0.0624187	0.99983
ENSMUSG00000031618	Nr3c2	3617	5271	6115	3731	3687	6213	4629.58	-0.122262	0.0639194	-1.91234	0.0558324	0.99983
ENSMUSG00000020340	Cyfip2	12921	20746	20398	15420	11664	21021	16616.3	-0.122229	0.0667122	-1.8489	0.0644729	0.99983
ENSMUSG00000030257	Srgap3	3734	6486	5691	4506	3386	5987	4856.59	-0.122048	0.0674944	-1.81593	0.0693816	0.99983
ENSMUSG00000060802	B2m	180	228	342	194	98	305	213.79	-0.121531	0.0611697	-2.10564	0.0352353	0.99983
ENSMUSG00000059921	Unc5c	833	1451	1925	909	907	1949	1253.42	-0.121338	0.0670449	-1.79268	0.0730238	0.99983
ENSMUSG00000032393	Dpp8	2352	3375	4462	2400	2450	4390	3111.88	-0.121082	0.0646395	-1.87375	0.0609647	0.99983
ENSMUSG00000006800	Sulf2	1175	2176	1996	1283	1242	2177	1620.7	-0.121014	0.0673656	-1.77111	0.0765416	0.99983
ENSMUSG00000017466	Timp2	1795	2854	2827	1975	1693	3018	2297.12	-0.12075	0.0667708	-1.80489	0.0710925	0.99983
ENSMUSG00000070003	Ssbp4	517	532	673	506	384	604	532.868	-0.120678	0.0675005	-1.7958	0.0725258	0.99983
ENSMUSG00000023011	Faim2	2694	3436	4005	2754	2379	4127	3160.73	-0.120612	0.0646844	-1.86289	0.0624774	0.99983
ENSMUSG00000015342	Xk	168	322	292	176	117	302	219.737	-0.120344	0.0590207	-2.05804	0.0395863	0.99983
ENSMUSG00000028184	Adgrl2	1258	1605	1793	1282	1072	1855	1448.97	-0.120271	0.066456	-1.80908	0.0704385	0.99983
ENSMUSG00000043259	Fam13c	222	496	394	258	194	407	316.432	-0.12016	0.0616703	-1.89705	0.0578215	0.99983
ENSMUSG00000031119	Gpc4	419	772	753	494	405	737	577.487	-0.119863	0.0668978	-1.77677	0.0756058	0.99983
ENSMUSG00000009406	Elk1	302	491	601	333	295	547	411.408	-0.11964	0.0668053	-1.78019	0.0750443	0.99983
ENSMUSG00000037428	Vgf	2658	3131	3524	2911	2192	3328	2939.97	-0.119429	0.0650631	-1.8632	0.0624342	0.99983
ENSMUSG00000059146	Ntrk3	4655	6125	7152	4938	3939	7655	5582.64	-0.11913	0.064805	-1.8445	0.0651109	0.99983
ENSMUSG00000028053	Ash1l	2325	3775	4110	2682	2177	4309	3113.58	-0.11895	0.0668907	-1.78017	0.0750486	0.99983
ENSMUSG00000021732	Fgf10	89	166	176	85	77	141	117.706	-0.118833	0.0560353	-2.10088	0.0356519	0.99983
ENSMUSG00000006586	Runx1t1	443	700	664	437	397	732	546.572	-0.118806	0.0671854	-1.75719	0.0788847	0.99983
ENSMUSG00000038967	Pdk2	177	461	295	209	190	295	264.62	-0.118422	0.061157	-1.80758	0.0706725	0.99983
ENSMUSG00000031543	Ank1	379	532	511	406	325	476	435.061	-0.118368	0.0670727	-1.7871	0.0739218	0.99983
ENSMUSG00000055003	Lrtm2	284	611	499	274	303	581	407.691	-0.118166	0.0652375	-1.77325	0.0761881	0.99983
ENSMUSG00000030223	Ptpro	377	658	818	368	406	857	548.454	-0.118101	0.0674539	-1.7588	0.0786116	0.99983
ENSMUSG00000042826	Fgf11	179	268	357	180	161	310	232.519	-0.117768	0.0639784	-1.83669	0.0662551	0.99983
ENSMUSG00000035901	Dennd5a	2077	3029	3560	2145	2093	3655	2670.96	-0.117696	0.0649897	-1.81067	0.0701924	0.99983
ENSMUSG00000037815	Ctnna1	212	358	378	189	246	341	279.497	-0.117685	0.065303	-1.80824	0.0705698	0.99983
ENSMUSG00000028532	Cachd1	482	688	728	541	427	667	579.964	-0.117491	0.0674978	-1.76888	0.0769134	0.99983
ENSMUSG00000007594	Hapln4	524	761	712	579	449	700	614.482	-0.117085	0.0675106	-1.7534	0.0795326	0.99983
ENSMUSG00000035202	Lars2	4726	4401	6573	5473	2374	7000	4956.77	-0.116905	0.0672284	-1.88226	0.0598011	0.99983
ENSMUSG00000038371	Sbf2	437	770	686	470	403	746	568.49	-0.116804	0.0668893	-1.72674	0.0842137	0.99983
ENSMUSG00000028995	Fam126a	289	447	544	278	309	498	380.6	-0.116739	0.0668365	-1.74426	0.0811142	0.99983
ENSMUSG00000052676	Zmat1	81	144	135	68	56	119	97.003	-0.116563	0.0526353	-2.21455	0.0267908	0.99983
ENSMUSG00000002489	Tiam1	2514	3478	4153	2539	2567	4119	3142.54	-0.116226	0.0647182	-1.79663	0.0723949	0.99983
ENSMUSG00000059401	Mamld1	279	521	398	314	243	411	354.649	-0.116135	0.0643959	-1.7781	0.0753879	0.99983
ENSMUSG00000034981	Parm1	825	1456	1540	999	802	1533	1149.67	-0.115866	0.0675904	-1.70736	0.087755	0.99983
ENSMUSG00000066607	Insyn1	726	988	1088	666	708	1127	863.584	-0.115755	0.0674745	-1.71328	0.0866602	0.99983
ENSMUSG00000026204	Ptprn	3562	5432	5103	4244	3190	5162	4386.24	-0.11564	0.0666475	-1.76293	0.077913	0.99983
ENSMUSG00000009216	Fam163b	224	578	399	295	210	389	338.893	-0.115479	0.0603183	-1.82758	0.0676129	0.99983
ENSMUSG00000046447	Camk2n1	2139	2996	3238	2290	1914	3440	2603.98	-0.115477	0.0658162	-1.75717	0.0788884	0.99983
ENSMUSG00000025738	Fbxl16	4061	6608	6033	4916	3984	5906	5182.47	-0.115392	0.0664303	-1.75855	0.0786541	0.99983
ENSMUSG00000013663	Pten	2726	3730	4899	2861	2511	5132	3496.03	-0.115248	0.0647525	-1.78451	0.0743403	0.99983
ENSMUSG00000028613	Lrp8	343	567	552	352	313	589	438.493	-0.115147	0.0666308	-1.71791	0.0858138	0.99983
ENSMUSG00000056596	Trnp1	321	481	445	324	306	425	379.906	-0.115063	0.0668145	-1.71869	0.0856712	0.99983
ENSMUSG00000036800	Fam135b	1212	1565	2041	1176	1140	2073	1483.58	-0.114868	0.0664291	-1.73017	0.0835999	0.99983
ENSMUSG00000067629	Syngap1	3919	5596	5154	4472	3135	5646	4587.74	-0.114746	0.0670301	-1.73406	0.0829082	0.99983
ENSMUSG00000030411	Nova2	600	1021	753	720	464	801	720.284	-0.114697	0.0660792	-1.76206	0.0780584	0.99983
ENSMUSG00000030213	Atf7ip	801	1097	1221	869	748	1151	964.721	-0.114649	0.0672282	-1.71841	0.0857213	0.99983
ENSMUSG00000032280	Tle3	573	805	862	647	432	892	684.023	-0.114578	0.0673304	-1.74215	0.0814816	0.99983
ENSMUSG00000034377	Tulp4	1833	2633	2989	1869	1811	3131	2307.88	-0.114567	0.065431	-1.75002	0.0801146	0.99983
ENSMUSG00000023046	Igfbp6	273	236	341	237	171	301	258.08	-0.11451	0.0645596	-1.74898	0.0802949	0.99983
ENSMUSG00000046574	Prr12	275	485	300	308	188	327	313.187	-0.114487	0.061414	-1.85182	0.064052	0.99983
ENSMUSG00000040035	Disp2	4463	6875	6549	5102	3890	7168	5546.21	-0.114383	0.0668791	-1.71939	0.0855437	0.99983
ENSMUSG00000037541	Shank2	1497	2500	1971	1801	1237	2138	1834.52	-0.114353	0.0674968	-1.71402	0.0865254	0.99983
ENSMUSG00000023034	Nr4a1	554	825	1093	567	516	1145	744.316	-0.114319	0.067578	-1.70107	0.0889289	0.99983
ENSMUSG00000028957	Per3	251	437	484	250	255	492	345.784	-0.114244	0.0661391	-1.71763	0.0858633	0.99983
ENSMUSG00000020331	Hcn2	510	764	646	565	424	666	591.561	-0.114005	0.0672833	-1.70568	0.0880673	0.99983
ENSMUSG00000029211	Gabra4	1047	1597	1919	1134	1055	1928	1393.97	-0.11393	0.0665904	-1.7075	0.0877293	0.99983
ENSMUSG00000048240	Gng7	767	1197	1143	884	680	1167	954.084	-0.113722	0.067592	-1.69644	0.0898029	0.99983
ENSMUSG00000029577	Ube3b	639	1111	1103	739	678	1068	866.903	-0.113609	0.0675673	-1.67047	0.0948266	0.99983
ENSMUSG00000048279	Sacs	2750	3039	4552	2480	2404	4639	3193.51	-0.113447	0.0662266	-1.70561	0.0880811	0.99983
ENSMUSG00000071341	Egr4	136	327	225	147	110	241	190.599	-0.113336	0.0564864	-1.92631	0.0540663	0.99983
ENSMUSG00000048078	Tenm4	3380	4637	4917	3632	3179	5011	4057.03	-0.113106	0.0642933	-1.76187	0.0780911	0.99983
ENSMUSG00000074405	Zfp865	220	325	315	216	170	325	255.75	-0.113099	0.0638455	-1.77284	0.0762547	0.99983
ENSMUSG00000055024	Ep300	925	1545	1476	1128	797	1520	1199.97	-0.113094	0.0674833	-1.69951	0.0892233	0.99983
ENSMUSG00000022361	Zhx1	753	1127	1515	832	774	1416	1026.34	-0.112652	0.0671879	-1.66755	0.0954049	0.99983
ENSMUSG00000090071	Cdk5r2	721	859	771	788	555	737	747.307	-0.112561	0.0675542	-1.71256	0.0867935	0.99983
ENSMUSG00000050538	B230217C12Rik	250	326	393	246	182	398	289.435	-0.112506	0.0650618	-1.75269	0.079656	0.99983
ENSMUSG00000042671	Rgs8	588	899	896	598	552	968	730.546	-0.112166	0.0675921	-1.6515	0.0986372	0.99983
ENSMUSG00000040972	Igsf21	165	237	197	158	123	188	177.442	-0.11205	0.060999	-1.83054	0.0671686	0.99983
ENSMUSG00000015094	Npdc1	779	1472	1189	861	884	1255	1053.84	-0.112017	0.0674669	-1.62789	0.103547	0.99983
ENSMUSG00000030401	Rtn2	272	354	417	264	237	383	314.71	-0.111749	0.0660772	-1.69515	0.0900465	0.99983
ENSMUSG00000021510	Zfp729a	215	257	419	200	170	384	261.13	-0.111723	0.0649481	-1.72627	0.0842988	0.99983
ENSMUSG00000036568	Bicral	283	482	434	310	242	451	357.665	-0.111644	0.0651837	-1.70653	0.0879094	0.99983
ENSMUSG00000027425	Kat14	274	403	467	297	243	429	342.423	-0.111398	0.0661786	-1.69396	0.090272	0.99983
ENSMUSG00000021752	Kctd6	252	432	402	262	263	383	325.664	-0.111232	0.0660639	-1.66774	0.0953678	0.99983
ENSMUSG00000021745	Ptprg	1517	2350	2736	1677	1519	2812	2026.38	-0.111125	0.0661174	-1.67774	0.0933979	0.99983
ENSMUSG00000062372	Otof	77	107	84	25	59	69	70.0857	-0.111075	0.0451515	-2.57369	0.0100621	0.99983
ENSMUSG00000023915	Tnfrsf21	964	1563	1695	1102	966	1706	1290.84	-0.111048	0.0671842	-1.64861	0.099228	0.99983
ENSMUSG00000042851	Zc3h6	276	444	465	289	221	501	351.655	-0.111011	0.0650239	-1.722	0.0850704	0.99983
ENSMUSG00000025221	Kcnip2	518	811	763	569	430	831	637.4	-0.1109	0.0671287	-1.65776	0.0973666	0.99983
ENSMUSG00000034361	Cpne2	124	284	258	99	172	256	190.354	-0.110882	0.061792	-1.81584	0.0693952	0.99983
ENSMUSG00000028698	Pik3r3	399	749	785	422	466	801	579.478	-0.110351	0.0675345	-1.61019	0.107357	0.99983
ENSMUSG00000003810	Mast2	834	1370	1276	972	731	1365	1064.33	-0.110281	0.067545	-1.64056	0.100888	0.99983
ENSMUSG00000032807	Alox12b	84	97	138	86	44	68	85.5841	-0.110083	0.0497622	-2.40725	0.0160732	0.99983
ENSMUSG00000007880	Arid1a	1041	1564	1460	1266	825	1499	1256.26	-0.109869	0.0675546	-1.68042	0.0928762	0.99983
ENSMUSG00000020173	Cobl	650	1039	755	770	465	837	748.51	-0.109786	0.0659269	-1.70023	0.0890877	0.99983
ENSMUSG00000010277	2610507B11Rik	2750	4032	4343	2808	2691	4770	3461.07	-0.109759	0.0652753	-1.67922	0.0931091	0.99983
ENSMUSG00000038248	Sobp	851	1451	1069	1037	690	1156	1033.89	-0.109221	0.0668893	-1.65421	0.0980858	0.99983
ENSMUSG00000050587	Lrrc4c	1211	1980	2498	1390	1263	2499	1724.93	-0.109176	0.0666386	-1.6252	0.104119	0.99983
ENSMUSG00000040929	Rfx3	1375	2078	2893	1453	1480	2874	1928.22	-0.108943	0.0656228	-1.65567	0.0977882	0.99983
ENSMUSG00000049556	Lingo1	2078	3228	2999	2426	1802	3247	2577.34	-0.108936	0.0673395	-1.63196	0.102688	0.99983
ENSMUSG00000039988	Ankrd13c	646	1025	1023	722	572	1099	823.256	-0.108886	0.0675475	-1.61554	0.106193	0.99983
ENSMUSG00000026077	Npas2	227	363	323	223	175	361	271.002	-0.108562	0.0631539	-1.71244	0.0868151	0.99983
ENSMUSG00000000085	Scmh1	131	325	231	160	119	222	192.007	-0.108522	0.0573076	-1.80994	0.0703045	0.99983
ENSMUSG00000068373	D430041D05Rik	2939	3869	4253	2976	2603	4695	3470.85	-0.108443	0.0652929	-1.65535	0.0978537	0.99983
ENSMUSG00000041164	Zmiz2	882	1297	1161	1035	717	1207	1039.02	-0.108136	0.0675875	-1.63534	0.101977	0.99983
ENSMUSG00000040669	Phc1	220	293	315	230	183	270	249.465	-0.108109	0.0644417	-1.7096	0.087339	0.99983
ENSMUSG00000047557	Lxn	254	430	444	317	177	427	329.631	-0.107863	0.0623018	-1.81105	0.0701326	0.99983
ENSMUSG00000020918	Kat2a	452	719	609	419	399	742	542.576	-0.107819	0.0665787	-1.59494	0.110726	0.99983
ENSMUSG00000030410	Dmwd	579	938	794	652	508	857	709.984	-0.107749	0.067336	-1.59627	0.11043	0.99983
ENSMUSG00000059852	Kcng2	164	242	323	175	148	265	211.731	-0.107675	0.0629208	-1.71254	0.0867979	0.99983
ENSMUSG00000050272	Dscam	742	1222	1082	845	647	1194	933.638	-0.107616	0.0674523	-1.5942	0.110891	0.99983
ENSMUSG00000045962	Wnk1	1209	2084	2038	1435	1124	2199	1626.76	-0.107566	0.067588	-1.59024	0.111781	0.99983
ENSMUSG00000064127	Med14	890	1370	1396	973	780	1552	1124.32	-0.107443	0.0675757	-1.59406	0.110923	0.99983
ENSMUSG00000029119	Man2b2	141	215	259	146	111	234	177.319	-0.107443	0.06088	-1.7807	0.0749608	0.99983
ENSMUSG00000042425	Frmpd3	342	591	464	382	284	508	421.073	-0.107425	0.0652127	-1.63259	0.102555	0.99983
ENSMUSG00000040543	Pitpnm3	430	713	603	499	411	587	535.485	-0.107309	0.0671833	-1.60672	0.108116	0.99983
ENSMUSG00000026193	Fn1	462	834	833	540	445	869	639.668	-0.10729	0.0671084	-1.58487	0.112995	0.99983
ENSMUSG00000036712	Cyld	2619	3686	4660	2725	2761	4560	3391.45	-0.107178	0.0646168	-1.65908	0.0971005	0.99983
ENSMUSG00000032589	Bsn	3915	6133	4306	4878	3059	4658	4509.26	-0.10715	0.067586	-1.64251	0.100485	0.99983
ENSMUSG00000032373	Car12	266	504	563	316	312	487	393.668	-0.10707	0.0663735	-1.57715	0.114762	0.99983
ENSMUSG00000004798	Ulk2	1316	2134	2476	1390	1421	2620	1816.05	-0.107023	0.0661097	-1.61577	0.106144	0.99983
ENSMUSG00000058248	Kcnh1	503	772	838	555	520	779	646.921	-0.106955	0.067592	-1.58572	0.112803	0.99983
ENSMUSG00000032024	Clmp	118	222	253	125	101	239	167.105	-0.106863	0.05924	-1.79616	0.0724697	0.99983
ENSMUSG00000019818	Cd164	157	323	338	184	163	310	235.127	-0.106602	0.0625868	-1.65553	0.0978178	0.99983
ENSMUSG00000025404	R3hdm2	1386	2194	1979	1705	1082	2140	1712.36	-0.106506	0.0674249	-1.62818	0.103487	0.99983
ENSMUSG00000044365	Cxxc4	238	329	411	234	181	432	291.063	-0.106314	0.0648567	-1.66733	0.0954494	0.99983
ENSMUSG00000006307	Kmt2b	366	684	499	422	354	524	469.495	-0.106296	0.0662139	-1.57359	0.115582	0.99983
ENSMUSG00000026479	Lamc2	410	419	453	339	320	456	400.134	-0.106212	0.0663971	-1.54589	0.122132	0.99983
ENSMUSG00000033237	Arid2	515	825	852	559	479	913	668.096	-0.106046	0.0675088	-1.56752	0.116993	0.99983
ENSMUSG00000036264	Fstl4	325	487	476	333	277	509	391.49	-0.105895	0.0663827	-1.5915	0.111498	0.99983
ENSMUSG00000035401	Emsy	496	745	734	537	380	834	602.292	-0.10565	0.0666949	-1.60443	0.108619	0.99983
ENSMUSG00000039546	Ajap1	374	524	584	420	319	553	452.626	-0.105337	0.0670645	-1.59646	0.110386	0.99983
ENSMUSG00000036097	Slf2	428	821	940	445	519	990	654.836	-0.10532	0.0675885	-1.54441	0.122488	0.99983
ENSMUSG00000057766	Ankrd29	93	226	208	111	100	175	145.96	-0.105173	0.0570376	-1.75905	0.0785697	0.99983
ENSMUSG00000038406	Scaf1	756	1490	1156	965	719	1214	1029.2	-0.104984	0.0668428	-1.55724	0.119415	0.99983
ENSMUSG00000031016	Wee1	183	327	299	197	159	305	237.559	-0.104945	0.0625495	-1.66297	0.0963192	0.99983
ENSMUSG00000038459	Abhd17c	269	445	449	306	227	455	347.235	-0.104827	0.0650963	-1.62075	0.105072	0.99983
ENSMUSG00000032536	Trak1	1463	2562	2494	1706	1515	2645	2002.02	-0.104792	0.0671229	-1.54711	0.121838	0.99983
ENSMUSG00000021143	Pacs2	443	878	718	544	458	729	614.525	-0.104753	0.0667646	-1.53927	0.123738	0.99983
ENSMUSG00000022494	Shisa9	328	595	635	433	292	578	460.433	-0.104685	0.0651186	-1.63274	0.102523	0.99983
ENSMUSG00000027977	Ndst3	287	458	484	308	264	490	369.804	-0.104604	0.0662952	-1.57487	0.115287	0.99983
ENSMUSG00000032087	Dscaml1	886	1504	1326	1051	848	1388	1145.22	-0.104379	0.0675896	-1.54365	0.122672	0.99983
ENSMUSG00000025876	Unc5a	769	1386	1185	971	754	1170	1022.19	-0.104332	0.0674834	-1.55741	0.119374	0.99983
ENSMUSG00000025314	Ptprj	2556	2876	3804	2574	2125	3925	2904.71	-0.104201	0.0649242	-1.59722	0.110216	0.99983
ENSMUSG00000030770	Parva	423	650	762	448	398	794	556.378	-0.104199	0.067462	-1.54556	0.12221	0.99983
ENSMUSG00000022096	Hr	175	208	224	137	134	225	181.061	-0.10419	0.0611936	-1.68259	0.0924551	0.99983
ENSMUSG00000037791	Phf12	242	444	387	275	223	396	319.359	-0.104145	0.0644968	-1.59491	0.110733	0.99983
ENSMUSG00000049532	Sall2	886	1252	1342	954	840	1362	1083.66	-0.104049	0.0670185	-1.55526	0.119885	0.99983
ENSMUSG00000022306	Zfpm2	159	399	361	202	190	336	262.686	-0.104001	0.0622943	-1.56304	0.118044	0.99983
ENSMUSG00000035107	Dcbld2	214	286	347	237	173	294	253.306	-0.103917	0.0642384	-1.65854	0.0972077	0.99983
ENSMUSG00000056427	Slit3	1668	2938	2530	1933	1697	2760	2206.12	-0.103871	0.0672408	-1.5272	0.12671	0.99983
ENSMUSG00000024378	Stard4	163	371	275	164	203	287	237.482	-0.103593	0.063427	-1.56115	0.118488	0.99983
ENSMUSG00000040022	Rab11fip2	1114	1511	2123	1228	1049	2078	1455.92	-0.10356	0.0664191	-1.5599	0.118784	0.99983
ENSMUSG00000055322	Tns1	161	259	298	182	126	276	208.72	-0.103314	0.0615642	-1.70456	0.0882763	0.99983
ENSMUSG00000040412	5330417C22Rik	360	654	586	389	336	664	481.12	-0.103105	0.0661537	-1.5371	0.12427	0.99983
ENSMUSG00000000184	Ccnd2	430	852	817	470	468	912	629.618	-0.103053	0.067191	-1.50254	0.132957	0.99983
ENSMUSG00000036422	Pcdh8	570	916	831	565	651	841	719.539	-0.102976	0.0675367	-1.51917	0.12872	0.99983
ENSMUSG00000025034	Trim8	472	793	733	465	530	776	614.16	-0.102929	0.0675842	-1.51107	0.130771	0.99983
ENSMUSG00000001143	Lman2l	270	465	404	269	245	461	342.056	-0.102926	0.0650457	-1.55871	0.119065	0.99983
ENSMUSG00000024533	Spire1	923	1321	1311	980	753	1515	1104.28	-0.102897	0.0675911	-1.52699	0.126764	0.99983
ENSMUSG00000005621	Zfp592	275	530	524	316	295	524	395.647	-0.102798	0.0662056	-1.51783	0.129058	0.99983
ENSMUSG00000021374	Nup153	619	907	1035	653	591	1077	787.916	-0.102608	0.0675107	-1.51978	0.128567	0.99983
ENSMUSG00000059361	Nrsn2	192	278	339	214	157	302	239.401	-0.102543	0.0636531	-1.63685	0.101661	0.99983
ENSMUSG00000041073	Nacad	299	364	392	308	237	366	325.461	-0.102499	0.0661978	-1.56956	0.116518	0.99983
ENSMUSG00000046093	Hpcal4	10080	16118	17602	11667	10243	18471	13574.4	-0.102441	0.064896	-1.57546	0.115151	0.99983
ENSMUSG00000000305	Cdh4	141	213	193	148	122	156	161.861	-0.102433	0.0602023	-1.73809	0.0821951	0.99983
ENSMUSG00000061911	Myt1l	3594	5695	5283	4287	3218	5739	4540.17	-0.102327	0.0671248	-1.53769	0.124124	0.99983
ENSMUSG00000021662	Arhgef28	1469	2339	2564	1592	1563	2692	1970.03	-0.102195	0.0659324	-1.54433	0.122508	0.99983
ENSMUSG00000055805	Fmnl1	569	1118	746	674	541	847	740.088	-0.102175	0.0664557	-1.48533	0.137457	0.99983
ENSMUSG00000034858	Fam214a	321	508	554	344	319	545	418.892	-0.10211	0.0670135	-1.5176	0.129115	0.99983
ENSMUSG00000021743	Fezf2	277	422	478	309	247	460	354.278	-0.102073	0.0661341	-1.55273	0.120489	0.99983
ENSMUSG00000041729	Coro2b	988	2076	1599	1217	1005	1811	1408.14	-0.102039	0.0671259	-1.46769	0.142188	0.99983
ENSMUSG00000045034	Ankrd34b	100	209	175	127	73	139	133.907	-0.101792	0.053551	-1.94669	0.0515724	0.99983
ENSMUSG00000043659	Npsr1	71	61	112	39	36	82	64.5612	-0.101781	0.047081	-2.16032	0.0307475	0.99983
ENSMUSG00000049807	Arhgap23	458	551	591	464	354	616	499.373	-0.101727	0.0673999	-1.51179	0.130588	0.99983
ENSMUSG00000027577	Chrna4	353	635	547	416	289	602	459.888	-0.101692	0.0647669	-1.57328	0.115654	0.99983
ENSMUSG00000063317	Usp31	1925	2536	3082	2090	1782	3107	2358.39	-0.101689	0.0652288	-1.56369	0.117891	0.99983
ENSMUSG00000094910	D430019H16Rik	2148	3005	3311	2296	2086	3444	2653.05	-0.101599	0.0650428	-1.56172	0.118354	0.99983
ENSMUSG00000036502	Tmem255a	238	469	405	289	223	407	328.791	-0.101329	0.0638406	-1.56381	0.117863	0.99983
ENSMUSG00000046668	Cxxc5	370	774	638	451	392	669	533.088	-0.101309	0.0661951	-1.4799	0.1389	0.99983
ENSMUSG00000028804	Csmd2	850	1227	1289	849	855	1367	1048.27	-0.101299	0.0671038	-1.50459	0.13243	0.99983
ENSMUSG00000033730	Egr3	857	1611	1372	1087	749	1503	1162.38	-0.101246	0.0666535	-1.52344	0.127649	0.99983
ENSMUSG00000030103	Bhlhe40	1071	2019	2193	1217	1307	2255	1607.5	-0.101246	0.0666378	-1.49156	0.135815	0.99983
ENSMUSG00000023087	Noct	449	815	739	520	370	854	600.806	-0.101122	0.0654327	-1.55036	0.121054	0.99983
ENSMUSG00000028926	Cdk14	2534	4314	4905	3064	2584	5085	3595.66	-0.101004	0.0667342	-1.50383	0.132624	0.99983
ENSMUSG00000024176	Sox8	211	359	513	229	216	494	316.498	-0.100888	0.0657713	-1.51446	0.129909	0.99983
ENSMUSG00000020396	Nefh	582	815	841	632	517	864	695.811	-0.100886	0.0675897	-1.4998	0.133667	0.99983
ENSMUSG00000001089	Luzp1	2202	3061	3082	2364	1904	3478	2624.53	-0.10078	0.066481	-1.51483	0.129815	0.99983
ENSMUSG00000075327	Zbtb2	136	221	249	131	113	252	175.498	-0.100617	0.0605399	-1.67149	0.0946245	0.99983
ENSMUSG00000024112	Cacna1h	1225	1589	1701	1269	1088	1809	1422.32	-0.100582	0.0665084	-1.50831	0.131474	0.99983
ENSMUSG00000075478	Slitrk1	1205	1953	1994	1392	1100	2204	1586.58	-0.100552	0.0675221	-1.49287	0.13547	0.99983
ENSMUSG00000058454	Dhcr7	197	315	264	214	175	249	234.093	-0.100492	0.063489	-1.5877	0.112354	0.99983
ENSMUSG00000024172	St6gal2	1392	1820	2331	1582	1142	2434	1722.4	-0.100408	0.0667514	-1.528	0.126513	0.99983
ENSMUSG00000030329	Pianp	246	521	377	312	200	400	334.239	-0.10024	0.0609476	-1.62552	0.104053	0.99983
ENSMUSG00000004980	Hnrnpa2b1	1399	2990	2127	1773	1490	2350	1982	-0.100193	0.0674133	-1.43127	0.152351	0.99983
ENSMUSG00000020848	Doc2b	1207	1932	1640	1490	1027	1736	1486.84	-0.100086	0.067574	-1.51559	0.129623	0.99983
ENSMUSG00000038351	Sgsm2	847	1005	1289	941	635	1329	980.812	-0.0999164	0.067384	-1.51545	0.129658	0.99983
ENSMUSG00000063260	Syt10	138	218	244	147	124	210	175.169	-0.0999038	0.0610744	-1.6399	0.101026	0.99983
ENSMUSG00000037992	Rara	110	275	196	122	100	211	162.358	-0.0997953	0.0558088	-1.69166	0.0907103	0.99983
ENSMUSG00000034135	Sik3	1838	2706	2748	2249	1617	2764	2279.8	-0.0997296	0.0671177	-1.52463	0.127351	0.99983
ENSMUSG00000001062	Vps9d1	232	331	286	234	181	303	258.661	-0.0996944	0.0640356	-1.54679	0.121913	0.99983
ENSMUSG00000020486	Sept4	764	1153	1311	801	784	1364	996.304	-0.0995532	0.0671507	-1.47998	0.138878	0.99983
ENSMUSG00000032356	Rasgrf1	7248	10403	11276	8038	6891	12047	9083.24	-0.0995177	0.0641828	-1.55251	0.120541	0.99983
ENSMUSG00000041115	Iqsec2	1875	3674	2595	2228	1956	2973	2512.22	-0.0994197	0.0675865	-1.42349	0.154593	0.99983
ENSMUSG00000015981	Stk32c	482	783	807	461	592	787	637.429	-0.0993596	0.0675903	-1.48141	0.138497	0.99983
ENSMUSG00000052707	Tnrc6a	283	406	545	295	262	532	370.539	-0.0992856	0.0667024	-1.49027	0.136152	0.99983
ENSMUSG00000027347	Rasgrp1	12477	18861	20398	13868	12320	22075	16172.1	-0.0992629	0.0642146	-1.54472	0.122414	0.99983
ENSMUSG00000038013	Wipf2	557	1093	894	690	526	979	768.151	-0.0992523	0.0664299	-1.46926	0.141763	0.99983
ENSMUSG00000056258	Kcnq3	3317	5169	5384	3941	2910	5937	4302.26	-0.0991832	0.067194	-1.49272	0.13551	0.99983
ENSMUSG00000026678	Rgs5	167	313	400	174	180	398	255.611	-0.0991746	0.0643317	-1.52279	0.127811	0.99983
ENSMUSG00000070509	Rgma	83	217	133	97	49	129	114.221	-0.0991683	0.0476953	-2.04257	0.0410949	0.99983
ENSMUSG00000033530	Ttc7b	1129	1733	1724	1249	1103	1837	1429.52	-0.0991609	0.0669014	-1.4789	0.139167	0.99983
ENSMUSG00000028960	Ube4b	758	1235	1233	848	736	1337	994.119	-0.0990813	0.0675513	-1.46005	0.144275	0.99983
ENSMUSG00000040548	Tex2	1333	1621	2144	1360	1215	2145	1591.5	-0.0989693	0.0661718	-1.49344	0.135321	0.99983
ENSMUSG00000078591	Hs3st4	477	694	896	463	550	818	629.212	-0.0988824	0.0675564	-1.47169	0.141103	0.99983
ENSMUSG00000031841	Cdh13	385	614	644	417	359	686	500.351	-0.0988469	0.0671382	-1.46919	0.14178	0.99983
ENSMUSG00000034168	Irf2bpl	687	1164	1083	813	704	1091	905.484	-0.098781	0.0675795	-1.45925	0.144498	0.99983
ENSMUSG00000022191	Drosha	957	1706	1582	1140	957	1706	1302.9	-0.0986524	0.0675859	-1.44557	0.148297	0.99983
ENSMUSG00000024283	Wac	703	1127	1172	867	598	1219	918.668	-0.0986409	0.0673716	-1.49475	0.134981	0.99983
ENSMUSG00000003575	Crtc1	1210	1872	1579	1510	1053	1594	1462.35	-0.0985105	0.067583	-1.51028	0.130971	0.99983
ENSMUSG00000053510	Nrd1	975	1667	1715	1064	1044	1875	1340.72	-0.0984798	0.0671272	-1.45505	0.145657	0.99983
ENSMUSG00000039159	Ube2h	613	982	1057	639	695	1056	817.278	-0.0983185	0.0673902	-1.45453	0.1458	0.99983
ENSMUSG00000018322	Tomm34	648	1069	965	714	583	1111	825.261	-0.0982586	0.0674074	-1.44727	0.147821	0.99983
ENSMUSG00000003154	Foxj2	274	412	450	286	249	459	344.238	-0.0981442	0.0662003	-1.48253	0.138201	0.99983
ENSMUSG00000028176	Lrrc7	2547	3866	4018	2926	2307	4423	3251.43	-0.0981145	0.0667286	-1.4779	0.139434	0.99983
ENSMUSG00000025422	Agap2	8720	14023	12744	10111	8741	13707	11145.5	-0.0980007	0.0654187	-1.49545	0.134796	0.99983
ENSMUSG00000049420	Tmem200a	548	796	843	606	460	914	674.857	-0.0979829	0.0674829	-1.46551	0.142781	0.99983
ENSMUSG00000024403	Atp6v1g2	1517	1861	2187	1673	1259	2245	1756.85	-0.097718	0.0660935	-1.494	0.135175	0.99983
ENSMUSG00000022811	Zfp148	1591	2338	2786	1728	1554	2973	2082.94	-0.0976931	0.0659363	-1.4828	0.138126	0.99983
ENSMUSG00000053580	Tanc2	3906	6402	6280	4331	3641	7436	5144.88	-0.0975933	0.0671595	-1.45074	0.146853	0.99983
ENSMUSG00000032011	Thy1	2984	4067	3887	3684	2277	4081	3462.61	-0.0975438	0.067346	-1.52065	0.128347	0.99983
ENSMUSG00000050271	Prag1	255	615	387	321	229	445	365.46	-0.0974461	0.0605847	-1.51173	0.130604	0.99983
ENSMUSG00000038990	Cables2	173	294	297	175	167	300	226.583	-0.0973994	0.0633977	-1.5215	0.128134	0.99983
ENSMUSG00000024883	Rin1	1109	1607	1764	1257	1007	1859	1394.83	-0.0973599	0.0670566	-1.46135	0.143919	0.99983
ENSMUSG00000068551	Zfp467	79	112	111	57	61	97	84.6048	-0.0972687	0.0517931	-1.87347	0.0610042	0.99983
ENSMUSG00000009376	Met	168	258	328	178	158	296	222.031	-0.0972657	0.0635381	-1.52618	0.126965	0.99983
ENSMUSG00000037369	Kdm6a	315	362	550	304	259	530	372.141	-0.0972322	0.0667399	-1.45794	0.144858	0.99983
ENSMUSG00000040797	Iqsec3	1250	1671	1685	1330	1108	1817	1455.55	-0.0971884	0.0666351	-1.45609	0.145369	0.99983
ENSMUSG00000072437	Nanos1	209	269	292	202	156	302	233.11	-0.0971703	0.0636753	-1.53306	0.125261	0.99983
ENSMUSG00000036225	Kctd1	488	667	816	546	417	820	606.176	-0.0971632	0.0675474	-1.45652	0.145249	0.99983
ENSMUSG00000032012	Nectin1	644	1055	946	742	572	1050	815.644	-0.0970938	0.0673943	-1.43946	0.150022	0.99983
ENSMUSG00000070866	Zfp804a	337	654	641	408	327	681	486.966	-0.0970335	0.0658374	-1.45012	0.147026	0.99983
ENSMUSG00000072825	Cep170b	2842	4968	4229	3345	3026	4529	3758.6	-0.0970252	0.0664452	-1.44727	0.147823	0.99983
ENSMUSG00000002803	Btbd6	263	472	430	269	270	472	351.311	-0.097022	0.0658482	-1.44827	0.147542	0.99983
ENSMUSG00000052949	Rnf157	2069	3643	3114	2399	2094	3504	2740.49	-0.0968981	0.0672373	-1.42127	0.155239	0.99983
ENSMUSG00000031822	Gse1	433	851	654	519	440	708	588.747	-0.0968956	0.0665811	-1.41557	0.156902	0.99983
ENSMUSG00000038250	Usp38	342	472	518	315	297	585	407.8	-0.0967591	0.0665721	-1.45674	0.145188	0.99983
ENSMUSG00000025237	Parp6	541	1019	1012	620	552	1134	778.038	-0.0966621	0.0673327	-1.41352	0.157503	0.99983
ENSMUSG00000035390	Brsk1	753	1169	1138	859	804	1078	955.525	-0.0965556	0.0673344	-1.44632	0.148087	0.99983
ENSMUSG00000002968	Med25	260	342	347	240	211	378	290.56	-0.096544	0.065126	-1.46957	0.141679	0.99983
ENSMUSG00000003948	Mmd	1259	1892	2520	1349	1246	2732	1740.23	-0.0964049	0.0663903	-1.4587	0.144647	0.99983
ENSMUSG00000048285	Frmd6	223	386	520	219	252	526	333.48	-0.0962568	0.0662479	-1.45574	0.145464	0.99983
ENSMUSG00000058975	Kcnc1	710	1165	1067	757	705	1205	911.501	-0.0962099	0.067579	-1.40695	0.159441	0.99983
ENSMUSG00000024548	Setbp1	760	1057	1122	945	539	1173	911.23	-0.0960109	0.0671633	-1.51961	0.128608	0.99983
ENSMUSG00000057637	Prdm2	759	1150	1193	862	698	1266	962.195	-0.0959772	0.0675337	-1.42686	0.153621	0.99983
ENSMUSG00000061436	Hipk2	248	487	360	233	207	485	323.25	-0.0958504	0.0612331	-1.54039	0.123464	0.99983
ENSMUSG00000078866	Zfp970	87	147	187	78	77	174	118.14	-0.0954902	0.0564097	-1.70147	0.0888546	0.99983
ENSMUSG00000041836	Ptpre	516	866	933	530	557	1021	708.209	-0.0954551	0.0675913	-1.40809	0.159105	0.99983
ENSMUSG00000000131	Xpo6	873	1266	1332	1007	817	1337	1084.24	-0.0953545	0.0672749	-1.43232	0.152053	0.99983
ENSMUSG00000019951	Uhrf1bp1l	1708	2399	2996	1840	1683	3109	2209.4	-0.0951974	0.0653882	-1.45665	0.145213	0.99983
ENSMUSG00000036959	Bcorl1	227	254	300	250	152	263	239.552	-0.0951744	0.0638833	-1.56966	0.116495	0.99983
ENSMUSG00000049577	Zfpm1	151	228	194	189	101	153	169.878	-0.0949843	0.0580244	-1.80172	0.0715901	0.99983
ENSMUSG00000023572	Ccndbp1	521	622	803	502	507	725	603.245	-0.0948731	0.0674784	-1.40811	0.1591	0.99983
ENSMUSG00000032875	Arhgef17	1911	2986	2800	2160	1856	3068	2414.36	-0.0948326	0.0665452	-1.42043	0.155482	0.99983
ENSMUSG00000031189	Aff2	96	187	160	106	82	145	126.008	-0.0947823	0.0557037	-1.67991	0.0929755	0.99983
ENSMUSG00000042757	Tmem108	80	139	124	75	63	112	96.4452	-0.094745	0.0530854	-1.76917	0.0768649	0.99983
ENSMUSG00000026344	Lypd1	597	707	997	633	492	993	712.392	-0.094697	0.0675371	-1.41193	0.157972	0.99983
ENSMUSG00000030306	Tmtc1	939	1302	1532	990	891	1618	1175.28	-0.09465	0.0668683	-1.41646	0.15664	0.99983
ENSMUSG00000034647	Ankrd12	1254	2101	2358	1449	1333	2472	1757.76	-0.0946346	0.0667363	-1.40677	0.159495	0.99983
ENSMUSG00000048833	Slc39a9	340	640	596	409	320	641	473.619	-0.0945904	0.0657356	-1.42191	0.155052	0.99983
ENSMUSG00000043456	Zfp536	83	190	178	101	103	123	126.646	-0.0945326	0.0558022	-1.65837	0.0972436	0.99983
ENSMUSG00000021782	Dlg5	321	533	487	372	287	508	408.74	-0.0944923	0.0660144	-1.43311	0.151825	0.99983
ENSMUSG00000031367	Ap1s2	177	307	378	206	180	340	253.334	-0.0943848	0.0640267	-1.4528	0.146278	0.99983
ENSMUSG00000029608	Rph3a	2443	3667	3712	2713	2391	4020	3085.51	-0.0943709	0.0656192	-1.43589	0.151033	0.99983
ENSMUSG00000037465	Klf10	417	605	828	426	398	874	561.553	-0.0942847	0.0675348	-1.40609	0.159697	0.99983
ENSMUSG00000036565	Ttyh3	1171	1818	1389	1299	1066	1593	1382.42	-0.094191	0.0674937	-1.37329	0.169664	0.99983
ENSMUSG00000046079	Lrrc8d	160	313	285	198	128	284	219.861	-0.0941596	0.0594862	-1.59199	0.111387	0.99983
ENSMUSG00000042156	Dzip1	188	354	334	210	172	357	258.73	-0.094093	0.0627969	-1.47853	0.139266	0.99983
ENSMUSG00000075224	Lrrc55	131	147	171	111	87	164	132.994	-0.0940928	0.0581316	-1.61606	0.106081	0.99983
ENSMUSG00000031256	Cstf2	709	1167	1091	752	704	1249	918.708	-0.0940611	0.0675862	-1.37689	0.168546	0.99983
ENSMUSG00000037979	Ccdc92	278	479	382	338	236	388	346.034	-0.0940194	0.0643889	-1.47761	0.139512	0.99983
ENSMUSG00000052981	Ube2ql1	1516	2395	2277	1786	1437	2439	1934.13	-0.0940004	0.0671242	-1.40565	0.159827	0.99983
ENSMUSG00000036095	Dgkb	2876	4286	5417	3194	2950	5644	3897.74	-0.0939591	0.0645494	-1.45379	0.146005	0.99983
ENSMUSG00000044628	Rnf208	191	316	255	232	156	233	229.484	-0.0939212	0.0619183	-1.56906	0.116633	0.99983
ENSMUSG00000057101	Zfp180	448	573	695	451	396	713	531.532	-0.0937999	0.0675252	-1.39009	0.164502	0.99983
ENSMUSG00000038331	Satb2	507	826	690	598	380	803	620.016	-0.0936321	0.0655364	-1.45299	0.146228	0.99983
ENSMUSG00000062098	Btbd3	2442	4232	4631	2934	2674	4771	3482.77	-0.0934988	0.0661982	-1.397	0.162413	0.99983
ENSMUSG00000089762	Ier5l	177	191	199	161	125	185	173.595	-0.0934514	0.0614236	-1.51539	0.129674	0.99983
ENSMUSG00000041297	Cdk13	1145	1562	1845	1135	1054	2098	1420.27	-0.0933448	0.0669651	-1.39962	0.161628	0.99983
ENSMUSG00000036957	Lrfn3	144	219	226	165	116	194	174.267	-0.0932771	0.0603242	-1.58992	0.111854	0.99983
ENSMUSG00000013846	St3gal1	113	243	221	123	122	216	166.325	-0.0932714	0.0596726	-1.50523	0.132266	0.99983
ENSMUSG00000026430	Rassf5	131	247	216	144	96	232	170.981	-0.09323	0.0571673	-1.6375	0.101526	0.99983
ENSMUSG00000028906	Epb41	298	359	476	272	242	507	345.993	-0.0932246	0.0662142	-1.41564	0.156881	0.99983
ENSMUSG00000000804	Usp32	2297	3705	4127	2600	2408	4418	3141.58	-0.093215	0.0656648	-1.41345	0.157523	0.99983
ENSMUSG00000049100	Pcdh10	1763	2485	2767	2000	1610	2929	2200.37	-0.0930864	0.0661767	-1.41589	0.156808	0.99983
ENSMUSG00000050248	Evc2	469	626	724	451	506	659	564.339	-0.0930478	0.0674253	-1.39165	0.164028	0.99983
ENSMUSG00000039765	Cc2d2a	249	599	484	212	428	515	401.546	-0.0929096	0.0665543	-1.45516	0.145626	0.99983
ENSMUSG00000028373	Astn2	789	1098	1147	804	709	1300	949.633	-0.0926035	0.0674824	-1.36712	0.171588	0.99983
ENSMUSG00000051950	B3glct	84	160	184	100	73	147	119.411	-0.0925514	0.054959	-1.67576	0.0937851	0.99983
ENSMUSG00000054263	Lifr	1105	1524	1732	1067	1109	1892	1364.55	-0.0924936	0.066829	-1.38515	0.166005	0.99983
ENSMUSG00000022587	Ly6e	292	512	512	386	211	520	390.979	-0.0922531	0.0625088	-1.55684	0.119509	0.99983
ENSMUSG00000056296	Synpr	1045	1758	2461	1063	1379	2395	1596.21	-0.0922441	0.0664478	-1.3958	0.162776	0.99983
ENSMUSG00000038456	Dennd2a	178	318	251	190	168	263	224.286	-0.0921942	0.0626396	-1.43611	0.150972	0.99983
ENSMUSG00000045912	C2cd4c	148	182	228	131	126	203	166.055	-0.0921781	0.0608525	-1.51492	0.129794	0.99983
ENSMUSG00000041607	Mbp	915	1959	1742	1115	1136	1867	1405.07	-0.0921682	0.0675433	-1.30726	0.191125	0.99983
ENSMUSG00000035392	Dennd1a	293	693	489	348	294	594	435.362	-0.0920013	0.0630571	-1.36536	0.172141	0.99983
ENSMUSG00000026135	Zfp142	213	324	268	214	178	294	245.475	-0.0918966	0.0635148	-1.42136	0.155213	0.99983
ENSMUSG00000054321	Taf4b	78	110	115	66	60	94	85.7425	-0.0917631	0.0522693	-1.7595	0.0784931	0.99983
ENSMUSG00000031833	Mast3	2952	4411	3812	3459	2771	4053	3554.01	-0.0916994	0.0661064	-1.39966	0.161615	0.99983
ENSMUSG00000022791	Tnk2	912	1281	1330	1009	944	1248	1110.6	-0.091644	0.0670546	-1.38429	0.166269	0.99983
ENSMUSG00000055078	Gabra5	1428	2268	2615	1820	1226	2757	1939.44	-0.091574	0.0675925	-1.38888	0.164869	0.99983
ENSMUSG00000028809	Srrm1	257	527	493	330	278	476	380.745	-0.091465	0.0651292	-1.36616	0.171887	0.99983
ENSMUSG00000023809	Rps6ka2	489	756	703	514	512	726	607.952	-0.0914538	0.06759	-1.34414	0.178903	0.99983
ENSMUSG00000022208	Jph4	2335	4132	3668	3027	2271	3822	3143.11	-0.0913677	0.0675531	-1.36633	0.171835	0.99983
ENSMUSG00000045659	Plekha7	403	414	600	358	314	620	438.495	-0.0908505	0.0669503	-1.3409	0.179954	0.99983
ENSMUSG00000020134	Peli1	336	695	703	417	392	708	519.343	-0.090849	0.0667882	-1.30655	0.191367	0.99983
ENSMUSG00000071856	Mcc	161	219	266	144	144	261	192.721	-0.0908346	0.062359	-1.45995	0.144303	0.99983
ENSMUSG00000039976	Tbc1d16	308	492	530	338	325	511	406.366	-0.090769	0.0669752	-1.34918	0.17728	0.99983
ENSMUSG00000020121	Srgap1	224	372	287	257	163	319	266.23	-0.0906465	0.0616102	-1.48199	0.138342	0.99983
ENSMUSG00000022602	Arc	2681	3241	3489	2721	2010	4268	2994.88	-0.0906383	0.0670207	-1.34792	0.177685	0.99983
ENSMUSG00000035476	Tab3	297	421	508	342	238	512	373.027	-0.0906376	0.0660456	-1.40569	0.159816	0.99983
ENSMUSG00000074746	Pdzd8	1182	1675	2185	1281	1116	2357	1561.58	-0.0906032	0.0665116	-1.36857	0.171135	0.99983
ENSMUSG00000004633	Chn2	75	107	130	62	47	124	86.6768	-0.0905833	0.0513716	-1.81032	0.0702457	0.99983
ENSMUSG00000030500	Slc17a6	1449	1567	2337	1496	1203	2328	1678.75	-0.0905488	0.066131	-1.36347	0.172733	0.99983
ENSMUSG00000015476	Prrt1	137	306	207	182	89	208	183.68	-0.0904942	0.0533825	-1.72812	0.0839663	0.99983
ENSMUSG00000055480	Zfp458	120	172	226	116	79	237	149.602	-0.0904763	0.0579518	-1.63103	0.102884	0.99983
ENSMUSG00000038866	Zcchc2	340	573	622	356	363	663	467.333	-0.0903851	0.0672186	-1.33525	0.181796	0.99983
ENSMUSG00000036782	Klhl13	629	822	1267	656	641	1180	829.437	-0.0903381	0.0674998	-1.33007	0.183496	0.99983
ENSMUSG00000006920	Ezh1	688	1121	1326	773	781	1304	963.218	-0.0902459	0.0672367	-1.33053	0.183342	0.99983
ENSMUSG00000027519	Rab22a	383	561	665	428	343	686	492.998	-0.0902191	0.067237	-1.35167	0.17648	0.99983
ENSMUSG00000059273	Zc3h4	497	643	712	518	465	694	580.341	-0.090175	0.0675835	-1.33938	0.180447	0.99983
ENSMUSG00000045333	Zfp423	60	94	85	54	42	62	65.6001	-0.0901659	0.0477738	-1.90975	0.0561649	0.99983
ENSMUSG00000036478	Btg1	133	266	241	151	139	232	187.709	-0.0899997	0.061	-1.43356	0.151698	0.99983
ENSMUSG00000042121	Ssh1	136	249	239	142	135	240	183.798	-0.0898837	0.0612272	-1.44161	0.149414	0.99983
ENSMUSG00000036882	Arhgap33	494	913	620	639	416	676	622.189	-0.0897968	0.0651956	-1.39062	0.164342	0.99983
ENSMUSG00000023923	Tbc1d5	336	503	605	400	307	576	439.96	-0.0896984	0.066828	-1.35881	0.174206	0.99983
ENSMUSG00000029516	Cit	1223	1567	1457	1285	1049	1615	1359.01	-0.0896426	0.0668313	-1.32808	0.184151	0.99983
ENSMUSG00000020747	Tmem94	383	616	577	447	356	596	486.076	-0.0895501	0.066927	-1.34293	0.179296	0.99983
ENSMUSG00000074918	Inafm2	420	553	611	418	365	664	492.857	-0.0894448	0.0673442	-1.3251	0.185137	0.99983
ENSMUSG00000020627	Klhl29	303	480	424	341	277	440	372.118	-0.0894282	0.0661538	-1.35035	0.176904	0.99983
ENSMUSG00000041272	Tox	184	347	336	230	187	306	257.846	-0.0893993	0.0632528	-1.40259	0.160738	0.99983
ENSMUSG00000042496	Prdm10	262	379	465	268	252	464	335.964	-0.0893719	0.0663492	-1.34697	0.177989	0.99983
ENSMUSG00000000632	Sez6	2763	4399	3641	3327	2491	4074	3408.66	-0.0892688	0.0673229	-1.33416	0.182153	0.99983
ENSMUSG00000002409	Dyrk1b	199	427	295	202	249	326	278.142	-0.0892409	0.0646263	-1.31211	0.189481	0.99983
ENSMUSG00000031826	Usp10	460	670	683	453	447	755	563.747	-0.0891142	0.0674995	-1.31205	0.189503	0.99983
ENSMUSG00000027465	Tbc1d20	336	513	536	359	356	514	427.348	-0.0889919	0.067172	-1.32461	0.1853	0.99983
ENSMUSG00000036890	Gtdc1	238	444	490	310	231	463	348.002	-0.0889676	0.0645099	-1.37002	0.170682	0.99983
ENSMUSG00000028341	Nr4a3	904	2219	2039	1141	1172	2296	1545.45	-0.0888823	0.0675014	-1.22037	0.222326	0.99983
ENSMUSG00000030600	Lrfn1	330	499	470	347	298	515	401.312	-0.0888573	0.0665715	-1.32484	0.185224	0.99983
ENSMUSG00000029004	Kmt2e	972	1614	1639	1101	971	1834	1309.17	-0.088817	0.0674233	-1.30926	0.190445	0.99983
ENSMUSG00000036790	Slitrk2	520	718	1065	568	497	1061	702.41	-0.0888147	0.067557	-1.31354	0.189001	0.99983
ENSMUSG00000014592	Camta1	3389	5688	5320	4006	3335	5982	4496.3	-0.088793	0.0669195	-1.3198	0.186903	0.99983
ENSMUSG00000000134	Tfe3	147	321	246	176	131	267	207.573	-0.0887832	0.0588079	-1.45585	0.145433	0.99983
ENSMUSG00000027016	Zfp385b	152	292	258	184	124	265	205.477	-0.0885342	0.0593956	-1.49058	0.136072	0.99983
ENSMUSG00000025203	Scd2	4604	9097	8896	5345	5251	10386	6936.18	-0.0884097	0.0670066	-1.29104	0.196689	0.99983
ENSMUSG00000026640	Plxna2	2151	3204	3262	2405	2053	3611	2712.84	-0.0883796	0.0661339	-1.33529	0.181783	0.99983
ENSMUSG00000055333	Fat2	60	102	63	50	38	57	61.8621	-0.0883605	0.0460096	-1.86549	0.0621133	0.99983
ENSMUSG00000044340	Phlpp1	1259	2052	1903	1439	1280	2081	1633.36	-0.0881999	0.0670079	-1.30715	0.191162	0.99983
ENSMUSG00000001120	Pcbp3	248	440	398	277	263	404	330.816	-0.0879674	0.0658461	-1.31378	0.188922	0.99983
ENSMUSG00000046269	Usp27x	192	215	261	167	144	268	203.537	-0.0879211	0.0626506	-1.39246	0.163783	0.99983
ENSMUSG00000003378	Grik5	1288	2274	1919	1599	1272	2082	1706.63	-0.0877372	0.0675784	-1.29403	0.195655	0.99983
ENSMUSG00000037210	Fam193a	354	571	572	395	334	615	459.605	-0.0876878	0.0668718	-1.30628	0.191458	0.99983
ENSMUSG00000004035	Gstm7	140	160	260	130	116	218	164.466	-0.0876376	0.0605553	-1.44035	0.14977	0.99983
ENSMUSG00000019929	Dcn	706	1311	1494	883	699	1631	1062.35	-0.0876167	0.0674096	-1.28571	0.198543	0.99983
ENSMUSG00000041889	Shisa4	481	535	704	517	348	729	538.746	-0.0875364	0.0674975	-1.32437	0.185379	0.99983
ENSMUSG00000025867	Cplx2	6936	12629	12641	8425	7658	13689	9969.02	-0.0874935	0.0662781	-1.29939	0.193809	0.99983
ENSMUSG00000039706	Ldb2	394	692	718	529	375	671	547.369	-0.0874262	0.0662459	-1.3468	0.178044	0.99983
ENSMUSG00000028106	Rprd2	757	1111	1155	853	672	1274	944.486	-0.0874117	0.0675676	-1.30125	0.193172	0.99983
ENSMUSG00000040624	Plekhg1	402	856	718	480	386	873	591.954	-0.0874111	0.0648577	-1.30605	0.191537	0.99983
ENSMUSG00000096188	Cmtm4	1087	1492	1626	1161	1018	1754	1325.05	-0.0873916	0.0667053	-1.30908	0.190507	0.99983
ENSMUSG00000070733	Fryl	647	848	1219	711	610	1186	836.284	-0.0873891	0.0674	-1.29716	0.194577	0.99983
ENSMUSG00000071266	Zfp946	78	136	103	68	47	114	88.4582	-0.0873851	0.0493464	-1.76164	0.0781297	0.99983
ENSMUSG00000053550	Shisa7	1132	2052	1668	1427	1036	1890	1500.79	-0.0872954	0.0673193	-1.29331	0.195903	0.99983
ENSMUSG00000040725	Hnrnpul1	1207	1749	1897	1288	1224	2018	1524.9	-0.0872242	0.0662818	-1.31337	0.18906	0.99983
ENSMUSG00000030226	Lmo3	1720	2536	3228	1974	1698	3363	2322.53	-0.0871571	0.0658478	-1.32426	0.185418	0.99983
ENSMUSG00000008730	Hipk1	1389	2284	2889	1626	1549	2916	2015.55	-0.087082	0.0661378	-1.30038	0.193471	0.99983
ENSMUSG00000031558	Slit2	585	1274	1324	673	786	1438	962.142	-0.0870666	0.0675397	-1.24053	0.21478	0.99983
ENSMUSG00000006651	Aplp1	9549	14450	14065	10498	10060	15135	12076.6	-0.0870306	0.063341	-1.36944	0.170863	0.99983
ENSMUSG00000074165	Zfp788	387	561	851	388	432	812	543.16	-0.0869325	0.067504	-1.2849	0.198826	0.99983
ENSMUSG00000055430	Nap1l5	2067	3206	3207	2320	2109	3486	2667.7	-0.0868387	0.0658086	-1.3148	0.188579	0.99983
ENSMUSG00000027652	Ralgapb	2189	3259	3762	2464	2237	3942	2882.29	-0.0866708	0.0651636	-1.32938	0.183724	0.99983
ENSMUSG00000036617	Etl4	623	1594	1224	778	790	1445	1030.66	-0.0865881	0.0667962	-1.18243	0.237036	0.99983
ENSMUSG00000038773	Kdm3b	599	961	1025	677	655	1022	801.812	-0.086567	0.0674842	-1.27716	0.201545	0.99983
ENSMUSG00000033697	Arhgap39	1296	1933	2009	1650	1151	2003	1641.53	-0.0865362	0.0674849	-1.33063	0.183311	0.99983
ENSMUSG00000042846	Lrrtm3	366	546	601	377	367	629	466.883	-0.0864084	0.0673276	-1.2797	0.20065	0.99983
ENSMUSG00000039782	Cpeb2	602	1232	997	756	611	1135	861.802	-0.086387	0.0666664	-1.25251	0.210385	0.99983
ENSMUSG00000046556	Zfp319	223	347	314	244	201	321	270.891	-0.0861469	0.0646021	-1.33061	0.183317	0.99983
ENSMUSG00000056812	St8sia3	1453	2401	2704	1821	1303	2973	2018.83	-0.0861375	0.0675921	-1.29216	0.196302	0.99983
ENSMUSG00000046329	Slc25a23	441	888	616	564	430	679	594.686	-0.0860929	0.065699	-1.27496	0.202323	0.99983
ENSMUSG00000047842	Diras2	3397	4618	4928	4003	2821	5404	4103.55	-0.0860438	0.0664479	-1.32206	0.186147	0.99983
ENSMUSG00000037253	Mex3c	502	662	859	542	461	860	626.84	-0.0860361	0.0675912	-1.27823	0.201169	0.99983
ENSMUSG00000052364	B630019K06Rik	208	299	298	263	147	270	244.568	-0.0859944	0.0620728	-1.50025	0.133551	0.99983
ENSMUSG00000034898	Filip1	80	93	125	49	57	118	83.7215	-0.0859897	0.0506714	-1.73271	0.083147	0.99983
ENSMUSG00000033454	Zbtb1	233	374	493	257	266	436	329.806	-0.0859236	0.0660455	-1.28207	0.199818	0.99983
ENSMUSG00000022840	Adcy5	1051	1417	1583	1145	1037	1574	1279.13	-0.0859009	0.0665965	-1.29568	0.195086	0.99983
ENSMUSG00000024661	Fth1	982	1620	1460	1293	920	1436	1268.9	-0.0858925	0.0675677	-1.3215	0.186334	0.99983
ENSMUSG00000102440	Pcdhga9	111	142	204	122	87	152	132.736	-0.0858813	0.0574717	-1.53251	0.125397	0.99983
ENSMUSG00000010453	Kansl3	596	966	1002	573	727	1052	797.09	-0.0857338	0.0675176	-1.28143	0.200043	0.99983
ENSMUSG00000024234	Mtpap	235	380	478	280	219	466	327.69	-0.0857025	0.0654327	-1.31085	0.189907	0.99983
ENSMUSG00000048271	Rbm33	464	933	896	491	630	957	702.296	-0.0856138	0.0675738	-1.24716	0.21234	0.99983
ENSMUSG00000028082	Sh3d19	152	158	242	134	116	214	164.762	-0.0854865	0.0605727	-1.40271	0.160704	0.99983
ENSMUSG00000031133	Arhgef6	130	192	223	110	127	221	161.285	-0.0853783	0.0603456	-1.42518	0.154105	0.99983
ENSMUSG00000074738	Fndc10	96	150	131	104	75	109	110.276	-0.0853743	0.0549478	-1.59077	0.111662	0.99983
ENSMUSG00000035164	Zc3h12c	175	212	307	144	148	317	207.41	-0.0852886	0.0625046	-1.38728	0.165357	0.99983
ENSMUSG00000053716	Dusp7	432	614	788	515	393	757	563.417	-0.0852654	0.0674294	-1.28199	0.199845	0.99983
ENSMUSG00000048280	Zfp738	280	407	567	336	224	572	377.731	-0.0852002	0.0657725	-1.333	0.182531	0.99983
ENSMUSG00000034488	Edil3	1790	2579	3456	2054	1799	3502	2426.6	-0.085167	0.0654942	-1.29842	0.194145	0.99983
ENSMUSG00000026883	Dab2ip	1203	1641	1637	1371	1109	1683	1426.31	-0.0851103	0.0666382	-1.29284	0.196067	0.99983
ENSMUSG00000059003	Grin2a	14834	17233	23010	15593	13096	23976	17483.5	-0.0850509	0.0627571	-1.34987	0.177058	0.99983
ENSMUSG00000019828	Grm1	668	1229	1200	746	822	1259	957.475	-0.085006	0.0673057	-1.24179	0.214315	0.99983
ENSMUSG00000054477	Kcnn2	344	654	622	456	325	632	489.058	-0.0849936	0.0653389	-1.30169	0.193023	0.99983
ENSMUSG00000068740	Celsr2	5767	9021	8162	6706	5677	9022	7273.17	-0.0849545	0.0656782	-1.29108	0.196675	0.99983
ENSMUSG00000047264	Zfp358	84	151	152	95	67	134	110.1	-0.0848055	0.0540774	-1.57702	0.114791	0.99983
ENSMUSG00000048154	Kmt2d	1097	1804	1355	1406	981	1432	1343.73	-0.0847569	0.0675424	-1.29583	0.195032	0.99983
ENSMUSG00000039275	Foxk2	912	1173	1315	997	819	1356	1076.46	-0.084733	0.0669799	-1.27272	0.203119	0.99983
ENSMUSG00000040907	Atp1a3	30184	44172	38409	36393	26656	42206	36062.3	-0.0847283	0.0661079	-1.3042	0.192164	0.99983
ENSMUSG00000015501	Hivep2	9325	13301	13982	10669	8568	15464	11602.3	-0.0846915	0.0649798	-1.30946	0.19038	0.99983
ENSMUSG00000087141	Plcxd2	993	1262	1471	1016	889	1610	1176.52	-0.0846014	0.0669416	-1.26049	0.207493	0.99983
ENSMUSG00000061718	Ppp1r1b	164	175	195	160	111	180	164.007	-0.0844184	0.0608305	-1.4087	0.158923	0.99983
ENSMUSG00000055415	Atp10b	105	115	153	102	58	139	109.235	-0.0844052	0.0552005	-1.59465	0.110791	0.99983
ENSMUSG00000062563	Cys1	120	247	224	131	128	229	173.158	-0.0843402	0.0601559	-1.35323	0.175983	0.99983
ENSMUSG00000030774	Pak1	4622	6185	7403	5340	3994	8044	5750.29	-0.0843282	0.0653191	-1.30792	0.1909	0.99983
ENSMUSG00000001729	Akt1	767	1090	1065	792	788	1118	925.065	-0.0843027	0.0672332	-1.24731	0.212284	0.99983
ENSMUSG00000033075	Senp1	100	130	117	76	71	125	101.853	-0.084282	0.0537381	-1.53622	0.124485	0.99983
ENSMUSG00000037843	Vstm2l	232	241	287	229	181	247	236.832	-0.0842632	0.0639442	-1.33935	0.180457	0.99983
ENSMUSG00000054604	Cggbp1	567	940	1088	665	585	1137	796.589	-0.0842174	0.0675897	-1.23664	0.216221	0.99983
ENSMUSG00000056124	B4galt6	1284	2165	2410	1553	1298	2601	1809.32	-0.0842136	0.0672856	-1.24512	0.213086	0.99983
ENSMUSG00000047888	Tnrc6b	2097	2730	3266	2326	1836	3542	2558.4	-0.0841992	0.0656138	-1.2919	0.196393	0.99983
ENSMUSG00000031666	Rbl2	358	552	618	391	376	612	470.775	-0.0841558	0.0673564	-1.24504	0.213119	0.99983
ENSMUSG00000048027	Rgmb	300	585	546	369	326	562	433.672	-0.0841039	0.0662103	-1.23605	0.216438	0.99983
ENSMUSG00000060771	Tsga10	140	243	253	142	137	263	188.633	-0.0840944	0.0616252	-1.35175	0.176456	0.99983
ENSMUSG00000015755	Tab2	206	347	385	220	226	376	283.238	-0.0840094	0.0654052	-1.26971	0.204189	0.99983
ENSMUSG00000031652	N4bp1	473	774	762	543	488	791	623.258	-0.0840006	0.0675487	-1.23648	0.216281	0.99983
ENSMUSG00000070564	Ntn5	66	70	78	43	37	67	59.6472	-0.0839912	0.0463063	-1.80057	0.0717702	0.99983
ENSMUSG00000003847	Nfat5	831	1254	1266	926	764	1432	1049.29	-0.0839719	0.0675298	-1.24341	0.213716	0.99983
ENSMUSG00000042548	Asxl1	550	830	818	603	528	888	687.53	-0.0839527	0.0675907	-1.23723	0.216003	0.99983
ENSMUSG00000018849	Wwc1	580	1141	861	678	693	931	802.287	-0.0839253	0.0675896	-1.20081	0.229826	0.99983
ENSMUSG00000058740	Kcnt1	391	467	594	384	357	578	452.231	-0.0839199	0.0672341	-1.2453	0.213021	0.99983
ENSMUSG00000027457	Snph	2706	4185	4088	3315	2478	4432	3456.73	-0.0837668	0.0670228	-1.26827	0.204701	0.99983
ENSMUSG00000020721	Helz	1035	1399	1629	1136	955	1728	1278.43	-0.0837571	0.0667505	-1.25952	0.207842	0.99983
ENSMUSG00000028893	Sesn2	108	170	136	87	90	155	121.961	-0.0837553	0.0557472	-1.46387	0.143229	0.99983
ENSMUSG00000020423	Btg2	135	139	182	95	101	181	135.784	-0.0837044	0.0571914	-1.44806	0.147601	0.99983
ENSMUSG00000095041	AC149090.1	243	436	421	286	292	371	335.753	-0.0836559	0.0659183	-1.26661	0.205293	0.99983
ENSMUSG00000033392	Clasp2	4751	6255	8139	4814	4745	8743	6018.74	-0.0836537	0.0640576	-1.30889	0.190571	0.99983
ENSMUSG00000044014	Npy5r	97	108	152	85	58	144	103.539	-0.0836323	0.0546686	-1.56628	0.117282	0.99983
ENSMUSG00000055204	Ankrd17	2715	3513	4348	2870	2651	4489	3341.34	-0.0836082	0.0644991	-1.29528	0.195223	0.99983
ENSMUSG00000032009	Sesn3	741	1320	1334	803	897	1432	1051.99	-0.0835964	0.0671307	-1.23163	0.218087	0.99983
ENSMUSG00000001542	Ell2	206	311	400	215	169	444	274.936	-0.0834328	0.064111	-1.33698	0.18123	0.99983
ENSMUSG00000039205	Ciz1	141	199	203	119	121	221	162.758	-0.0833634	0.0599553	-1.38586	0.165789	0.99983
ENSMUSG00000030084	Plxna1	2638	3984	3766	3200	2463	4001	3291.98	-0.0833531	0.0665869	-1.27138	0.203595	0.99983
ENSMUSG00000034765	Dusp5	222	294	525	201	232	496	308.177	-0.0833528	0.0655021	-1.28231	0.199735	0.99983
ENSMUSG00000071379	Hpcal1	138	281	226	170	116	237	188.86	-0.0831773	0.0581443	-1.40984	0.158588	0.99983
ENSMUSG00000053395	Cacng8	1826	2442	2541	1934	1714	2783	2169.23	-0.0831451	0.0656555	-1.26017	0.207607	0.99983
ENSMUSG00000055421	Pcdh9	2526	3137	4273	2727	2120	4762	3126.81	-0.0831242	0.0653942	-1.28344	0.199338	0.99983
ENSMUSG00000049612	Omg	571	912	1036	764	429	1095	768.826	-0.0830137	0.0659203	-1.34448	0.178793	0.99983
ENSMUSG00000029207	Apbb2	643	958	989	696	553	1173	807.167	-0.0829965	0.0674929	-1.23724	0.215999	0.99983
ENSMUSG00000033316	Galnt9	1433	1811	1950	1558	1341	1961	1660.5	-0.0829062	0.0659852	-1.26385	0.206285	0.99983
ENSMUSG00000009075	Cabp7	1673	2046	2742	1709	1679	2640	2031.21	-0.0828083	0.0663499	-1.24631	0.212652	0.99983
ENSMUSG00000030270	Cpne9	62	110	107	50	58	97	78.0216	-0.0828051	0.0506248	-1.62538	0.104081	0.99983
ENSMUSG00000029174	Tbc1d1	887	982	1299	878	693	1455	1001.65	-0.0827425	0.0673194	-1.22588	0.220245	0.99983
ENSMUSG00000040363	Bcor	298	396	474	273	267	530	359.559	-0.0827354	0.0662208	-1.25857	0.208185	0.99983
ENSMUSG00000047786	Lix1	275	453	568	310	294	561	391.962	-0.0826515	0.0667878	-1.22201	0.221704	0.99983
ENSMUSG00000074345	Tnfaip8l3	303	481	568	349	306	560	412.432	-0.0826175	0.0668581	-1.23051	0.218508	0.99983
ENSMUSG00000041762	Gpr155	591	1050	1087	665	628	1230	838.969	-0.0826103	0.0675875	-1.20757	0.227212	0.99983
ENSMUSG00000041000	Trim62	83	162	133	94	66	126	107.837	-0.0825674	0.0530135	-1.54231	0.122999	0.99983
ENSMUSG00000028944	Prkag2	486	948	856	611	521	914	700.349	-0.082557	0.0671173	-1.19847	0.230733	0.99983
ENSMUSG00000035045	Zc3h12b	531	811	947	643	480	983	706.152	-0.0825398	0.0674924	-1.23994	0.214996	0.99983
ENSMUSG00000061536	Sec22c	311	521	585	390	289	585	430.182	-0.0824774	0.0660968	-1.25739	0.208611	0.99983
ENSMUSG00000045991	Onecut2	38	72	77	31	34	50	48.7183	-0.0824738	0.043425	-1.8915	0.058557	0.99983
ENSMUSG00000028617	Lrrc42	151	256	240	121	159	277	193.53	-0.082425	0.0611459	-1.36812	0.171274	0.99983
ENSMUSG00000034463	Scara3	74	168	146	88	68	136	108.918	-0.0823797	0.0528691	-1.50505	0.132311	0.99983
ENSMUSG00000000861	Bcl11a	1011	1470	1593	1168	929	1716	1279.25	-0.082367	0.0672167	-1.23515	0.216776	0.99983
ENSMUSG00000026443	Lrrn2	1097	2307	1779	1374	1265	2002	1597.42	-0.0822529	0.0675834	-1.16136	0.245497	0.99983
ENSMUSG00000070565	Rasal2	1921	2451	3178	2091	1675	3477	2378.1	-0.082249	0.0656306	-1.26148	0.207136	0.99983
ENSMUSG00000037973	Itprid1	99	134	127	75	97	107	106.512	-0.0822244	0.0547301	-1.51761	0.129112	0.99983
ENSMUSG00000063142	Kcnma1	3721	5163	6097	4157	3393	6798	4722.94	-0.0821942	0.0652565	-1.26658	0.205304	0.99983
ENSMUSG00000036885	Arhgef26	241	399	475	220	244	560	336.233	-0.0821743	0.0653997	-1.30274	0.192665	0.99983
ENSMUSG00000039844	Rapgef1	822	1380	1236	944	900	1306	1079.67	-0.0821423	0.0672681	-1.2103	0.226164	0.99983
ENSMUSG00000040856	Dlk1	50	113	55	46	36	54	58.8389	-0.0821063	0.0439635	-1.73106	0.0834418	0.99983
ENSMUSG00000061689	Dlgap4	1182	2221	1707	1553	1078	1938	1582.24	-0.0819687	0.0669875	-1.22352	0.221131	0.99983
ENSMUSG00000026576	Atp1b1	13983	21039	23572	16073	14431	24962	18453.1	-0.0818261	0.0635529	-1.28733	0.19798	0.99983
ENSMUSG00000045009	Prrt3	498	693	710	637	405	674	596.611	-0.0817696	0.0670805	-1.30706	0.191191	0.99983
ENSMUSG00000021259	Cyp46a1	1835	2446	2428	2053	1664	2599	2148.27	-0.0816694	0.0658079	-1.24712	0.212355	0.99983
ENSMUSG00000034059	Ypel4	178	293	358	201	182	339	248.01	-0.0816401	0.0642566	-1.25723	0.208671	0.99983
ENSMUSG00000075376	Rc3h2	1560	2631	3280	1798	1755	3486	2301.14	-0.0816344	0.0659641	-1.22401	0.220947	0.99983
ENSMUSG00000018999	Slc35b4	437	688	733	490	426	790	574.941	-0.0815411	0.0674514	-1.2058	0.227893	0.99983
ENSMUSG00000075254	Heg1	124	198	267	141	118	235	172.39	-0.081528	0.0607901	-1.33081	0.183252	0.99983
ENSMUSG00000054459	Vsnl1	6365	9683	9600	8493	5040	10330	8065.94	-0.0815277	0.0675927	-1.28856	0.197553	0.99983
ENSMUSG00000024713	Pcsk5	299	481	655	334	345	607	433.373	-0.0814777	0.0671103	-1.19216	0.2332	0.99983
ENSMUSG00000021725	Parp8	280	298	433	279	187	468	312.273	-0.0814701	0.0656828	-1.27115	0.203676	0.99983
ENSMUSG00000064302	Clasp1	1512	2147	2361	1722	1476	2454	1901.67	-0.0813861	0.0659935	-1.23917	0.215283	0.99983
ENSMUSG00000053024	Cntn2	1036	1598	1622	1114	1088	1781	1338.42	-0.0812695	0.0667549	-1.21044	0.226109	0.99983
ENSMUSG00000041570	Camsap2	4577	6016	7740	4666	4680	8121	5775.58	-0.0812579	0.0641118	-1.2686	0.204583	0.99983
ENSMUSG00000025582	Nptx1	4270	7298	7680	5093	4919	7919	6011.09	-0.0812323	0.0649016	-1.24008	0.214946	0.99983
ENSMUSG00000066440	Zfyve26	254	332	319	262	201	344	282.154	-0.0811924	0.0650168	-1.24716	0.21234	0.99983
ENSMUSG00000063382	Bcl9l	205	353	264	257	186	249	252.371	-0.0811364	0.0628779	-1.32894	0.183869	0.99983
ENSMUSG00000062822	4833420G17Rik	238	336	476	243	234	470	317.451	-0.0811348	0.0661113	-1.22738	0.21968	0.99983
ENSMUSG00000036529	Sbf1	3844	5284	5954	4179	4037	5974	4788.67	-0.0811014	0.064012	-1.27024	0.204	0.99983
ENSMUSG00000079477	Rab7	931	1765	1533	1280	913	1580	1303.29	-0.0810924	0.0671588	-1.22131	0.221967	0.99983
ENSMUSG00000024743	Syt7	1927	3215	3222	2355	2069	3319	2619.03	-0.0810896	0.06647	-1.21794	0.223247	0.99983
ENSMUSG00000035681	Kcnc2	540	964	1169	613	652	1201	816.019	-0.0810328	0.067481	-1.17763	0.238944	0.99983
ENSMUSG00000031748	Gnao1	2642	5053	4439	3441	2607	5034	3748.04	-0.0810182	0.0675613	-1.1843	0.236294	0.99983
ENSMUSG00000069601	Ank3	3252	5505	4772	3904	3224	5424	4257.84	-0.0809937	0.0670589	-1.19831	0.230798	0.99983
ENSMUSG00000049606	Zfp644	1293	1694	2182	1362	1197	2377	1623.01	-0.0808626	0.0662309	-1.22484	0.220636	0.99983
ENSMUSG00000045967	Gpr158	2313	3382	4263	2801	2138	4500	3104.54	-0.0807899	0.0664	-1.22973	0.218799	0.99983
ENSMUSG00000043154	Ppp2r3a	363	618	774	372	424	827	533.972	-0.0807332	0.0675045	-1.19935	0.230394	0.99983
ENSMUSG00000013033	Adgrl1	6471	8111	9552	7173	5814	10076	7704.9	-0.0806798	0.0633718	-1.27782	0.201313	0.99983
ENSMUSG00000056091	St3gal5	457	918	759	491	627	805	662.083	-0.0806791	0.0675876	-1.16765	0.242949	0.99983
ENSMUSG00000053963	Stum	4687	6508	7331	5431	4398	7758	5872.42	-0.0806733	0.0645975	-1.25865	0.208158	0.99983
ENSMUSG00000052031	Tagap1	155	228	262	143	143	277	193.77	-0.0806258	0.0621758	-1.30291	0.192604	0.99983
ENSMUSG00000024949	Sf1	416	843	601	559	366	676	565.755	-0.0805678	0.0639859	-1.24736	0.212267	0.99983
ENSMUSG00000021071	Trim9	2610	4426	3941	3311	2428	4392	3439.39	-0.0805388	0.0675478	-1.20378	0.228676	0.99983
ENSMUSG00000056476	Med12l	491	780	775	556	454	875	635.373	-0.0805213	0.0673497	-1.19405	0.232459	0.99983
ENSMUSG00000046519	Golph3l	163	267	364	193	160	336	234.977	-0.0804014	0.0634855	-1.25157	0.210728	0.99983
ENSMUSG00000066392	Nrxn3	3168	4857	5265	3507	3365	5711	4185.47	-0.0803787	0.0645526	-1.24179	0.214314	0.99983
ENSMUSG00000033618	Map3k13	459	710	693	482	456	777	581.142	-0.0803666	0.0674972	-1.17944	0.238223	0.99983
ENSMUSG00000028444	Cntfr	62	135	118	70	75	81	88.8372	-0.080354	0.0516767	-1.54491	0.122369	0.99983
ENSMUSG00000040659	Efhd2	750	930	983	720	712	1051	848.046	-0.0803424	0.0674909	-1.17372	0.240508	0.99983
ENSMUSG00000041380	Htr2c	545	872	1110	656	587	1071	774.619	-0.0802967	0.06758	-1.17528	0.239881	0.99983
ENSMUSG00000021245	Mlh3	438	771	850	458	548	884	633.166	-0.0802224	0.06759	-1.18054	0.237784	0.99983
ENSMUSG00000045973	Slc25a51	693	1129	1259	789	722	1361	954.673	-0.0802038	0.0674604	-1.18165	0.237345	0.99983
ENSMUSG00000025880	Smad7	138	197	206	137	118	204	162.999	-0.0801624	0.0605626	-1.32288	0.185875	0.99983
ENSMUSG00000044098	Rsbn1	317	505	583	334	347	597	431.061	-0.0801339	0.0671927	-1.18601	0.235618	0.99983
ENSMUSG00000024976	Shoc2	700	1069	1438	801	746	1440	986.313	-0.0801026	0.0672227	-1.18166	0.237342	0.99983
ENSMUSG00000034586	Hid1	1038	1491	1472	1087	1036	1631	1268.99	-0.0800133	0.0668334	-1.18762	0.234984	0.99983
ENSMUSG00000048911	Rnf24	191	361	295	222	163	341	254.029	-0.0799533	0.0612987	-1.28193	0.199868	0.99983
ENSMUSG00000046982	Tshz1	89	129	128	76	69	130	100.853	-0.0799194	0.0540481	-1.47266	0.140842	0.99983
ENSMUSG00000029202	Pds5a	792	1142	1441	860	817	1489	1050.17	-0.0799129	0.0669921	-1.19181	0.233335	0.99983
ENSMUSG00000001741	Il16	148	327	384	171	216	350	252.579	-0.07987	0.0643785	-1.169	0.242404	0.99983
ENSMUSG00000015829	Tnr	3296	4056	5154	3607	2949	5412	3971.4	-0.0797857	0.0641528	-1.2468	0.212469	0.99983
ENSMUSG00000103332	Pcdhga2	170	227	275	178	154	247	204.035	-0.0797754	0.0629462	-1.2786	0.201037	0.99983
ENSMUSG00000037110	Ralgapa2	217	332	363	225	209	380	278.405	-0.0797711	0.065154	-1.22044	0.222297	0.99983
ENSMUSG00000047712	Ust	643	1034	1098	730	620	1240	861.369	-0.0797485	0.067591	-1.17849	0.238603	0.99983
ENSMUSG00000067028	Cntnap5b	492	637	929	532	475	894	634.61	-0.079722	0.0675917	-1.1773	0.239075	0.99983
ENSMUSG00000037266	Rsrp1	366	684	634	395	423	712	517.724	-0.0796835	0.0672564	-1.15817	0.246796	0.99983
ENSMUSG00000016256	Ctsz	128	183	231	118	128	212	161.109	-0.0796658	0.0605776	-1.31652	0.187999	0.99983
ENSMUSG00000024268	Celf4	2187	4169	4120	2854	2209	4601	3220.45	-0.079663	0.0675878	-1.16163	0.245385	0.99983
ENSMUSG00000021557	Agtpbp1	4384	6233	8089	4660	4757	8372	5856.58	-0.0796448	0.0636516	-1.25276	0.210292	0.99983
ENSMUSG00000022201	Zfr	4356	6467	7838	4959	4309	8583	5846.63	-0.0796422	0.0648206	-1.23079	0.218401	0.99983
ENSMUSG00000003279	Dlgap1	6676	9357	10514	7733	6164	11434	8411.91	-0.0796393	0.0647824	-1.23863	0.215484	0.99983
ENSMUSG00000030852	Tacc2	581	805	825	606	512	951	696.037	-0.0795801	0.0675755	-1.17297	0.240806	0.99983
ENSMUSG00000021375	Kif13a	166	273	283	157	178	296	218.114	-0.0795763	0.0633999	-1.25015	0.211246	0.99983
ENSMUSG00000032827	Ppp1r9a	1556	1852	2479	1622	1359	2661	1861.08	-0.0795454	0.0658224	-1.20799	0.227052	0.99983
ENSMUSG00000009569	Mkl2	3673	5295	6068	4358	3343	6618	4736.91	-0.0794467	0.0659923	-1.21815	0.223168	0.99983
ENSMUSG00000032261	Sh3bgrl2	453	536	708	475	363	752	530.866	-0.0794425	0.0675026	-1.18873	0.234547	0.99983
ENSMUSG00000004356	Utp20	418	503	685	399	383	707	499.05	-0.0794284	0.067381	-1.17769	0.23892	0.99983
ENSMUSG00000038576	Susd4	662	1142	990	791	670	1088	872.801	-0.0793568	0.0675732	-1.16138	0.245486	0.99983
ENSMUSG00000090125	Pou3f1	1169	1271	1529	1230	993	1507	1274.46	-0.0792439	0.0667559	-1.18796	0.234848	0.99983
ENSMUSG00000022439	Parvg	89	104	153	76	75	118	99.9117	-0.0791737	0.0540394	-1.46571	0.142726	0.99983
ENSMUSG00000032348	Gsta4	629	753	995	682	551	986	747.005	-0.0791732	0.0675007	-1.18109	0.237567	0.99983
ENSMUSG00000050022	Amz1	82	155	109	67	89	112	101.19	-0.0791607	0.0541383	-1.41454	0.157202	0.99983
ENSMUSG00000026447	Pik3c2b	234	381	349	233	218	412	295.308	-0.0791208	0.0645494	-1.20954	0.226454	0.99983
ENSMUSG00000027583	Zbtb46	102	171	171	105	95	163	130.717	-0.0791038	0.0577187	-1.35782	0.17452	0.99983
ENSMUSG00000043857	Mgat5b	366	527	535	427	330	536	446.441	-0.0790601	0.0670063	-1.20255	0.22915	0.99983
ENSMUSG00000036052	Dnajb5	872	1679	1667	996	1127	1770	1304.81	-0.0790501	0.0668719	-1.15556	0.247863	0.99983
ENSMUSG00000031983	2310022B05Rik	85	229	151	83	99	185	132.817	-0.079035	0.0549263	-1.32679	0.184579	0.99983
ENSMUSG00000025790	Slco3a1	231	383	442	297	217	411	318.993	-0.0789346	0.0647163	-1.23635	0.216328	0.99983
ENSMUSG00000041313	Slc7a1	358	540	560	380	308	659	450.983	-0.0789287	0.0664544	-1.19499	0.23209	0.99983
ENSMUSG00000030621	Me3	431	710	762	466	498	778	589.418	-0.0789071	0.0675866	-1.15838	0.246711	0.99983
ENSMUSG00000013833	Med16	505	697	656	478	503	734	588.148	-0.0788602	0.06752	-1.14788	0.251019	0.99983
ENSMUSG00000043323	Fbrsl1	135	312	214	185	131	209	194.21	-0.0788378	0.0578872	-1.31675	0.187921	0.99983
ENSMUSG00000027200	Sema6d	633	1013	1116	726	629	1222	857.06	-0.0788207	0.0675784	-1.1635	0.244628	0.99983
ENSMUSG00000041592	Sdk2	323	516	394	377	270	445	384.472	-0.0787606	0.0652479	-1.20239	0.229213	0.99983
ENSMUSG00000071984	Fndc1	48	111	71	44	52	60	63.6884	-0.0786992	0.0472786	-1.5873	0.112444	0.99983
ENSMUSG00000038604	Ripor1	876	1511	1165	1070	817	1341	1114.91	-0.0786586	0.0674529	-1.15467	0.248227	0.99983
ENSMUSG00000034342	Cbl	906	1628	1591	1118	899	1797	1274.86	-0.0786392	0.0675635	-1.15252	0.249107	0.99983
ENSMUSG00000032020	Ubash3b	210	463	411	249	266	431	326.144	-0.078614	0.0653044	-1.13702	0.255531	0.99983
ENSMUSG00000053141	Ptprt	2569	3023	3713	2419	2300	4252	2962.95	-0.0785447	0.0662224	-1.17435	0.240254	0.99983
ENSMUSG00000071267	Zfp942	160	329	422	203	200	382	267.159	-0.0785183	0.0640565	-1.14887	0.250611	0.99983
ENSMUSG00000050822	Slc29a4	123	165	199	107	110	195	145.224	-0.0785011	0.0592608	-1.32786	0.184224	0.99983
ENSMUSG00000048040	Arxes2	332	500	651	356	320	701	453.38	-0.0785008	0.0671428	-1.17616	0.23953	0.99983
ENSMUSG00000045215	Asxl3	149	237	222	170	109	237	182.302	-0.0784317	0.0593509	-1.35193	0.176398	0.99983
ENSMUSG00000033910	Gucy1a1	686	950	1091	748	661	1144	857.014	-0.0782991	0.0673649	-1.16432	0.244294	0.99983
ENSMUSG00000005982	Naa60	154	378	297	197	166	329	243.212	-0.0782906	0.0603238	-1.20257	0.229141	0.99983
ENSMUSG00000020315	Sptbn1	3607	4537	5329	3730	3288	5953	4295.56	-0.0782164	0.0646121	-1.20476	0.228296	0.99983
ENSMUSG00000009681	Bcr	2185	3791	3165	2683	2257	3489	2881.78	-0.0781834	0.0671342	-1.15639	0.247523	0.99983
ENSMUSG00000025871	4833439L19Rik	433	765	757	545	408	820	599.926	-0.0781162	0.0666412	-1.17281	0.240871	0.99983
ENSMUSG00000036466	Megf11	293	504	525	350	303	533	404.712	-0.0781108	0.0664985	-1.1633	0.244709	0.99983
ENSMUSG00000047248	C2cd3	367	683	584	452	341	667	500.401	-0.0780906	0.0655565	-1.17433	0.240264	0.99983
ENSMUSG00000039519	Cyp7b1	180	306	379	189	203	375	259.416	-0.0780461	0.0648819	-1.18891	0.234475	0.99983
ENSMUSG00000039145	Camk1d	2670	3937	4149	3105	2541	4552	3403.38	-0.0780277	0.0659274	-1.18896	0.234456	0.99983
ENSMUSG00000031642	Sh3rf1	809	1296	1258	942	822	1356	1055.91	-0.0779613	0.0674195	-1.1521	0.249281	0.99983
ENSMUSG00000047789	Slc38a9	235	327	342	218	205	396	278.6	-0.0779007	0.0646037	-1.20335	0.228842	0.99983
ENSMUSG00000017167	Cntnap1	3351	4997	5308	3751	3574	5578	4327.36	-0.0778998	0.0641617	-1.21332	0.225009	0.99983
ENSMUSG00000020196	Cabin1	976	1333	1365	1011	915	1547	1167.19	-0.0778944	0.0671042	-1.1511	0.249691	0.99983
ENSMUSG00000025576	Rbfox3	1042	1611	1464	1283	1017	1495	1305.78	-0.0778769	0.0673531	-1.18156	0.23738	0.99983
ENSMUSG00000042567	Nek10	50	63	137	43	35	105	66.6908	-0.077835	0.0483309	-1.60789	0.107859	0.99983
ENSMUSG00000055923	Aasdh	83	150	119	83	66	125	101.861	-0.077825	0.052949	-1.43686	0.150759	0.99983
ENSMUSG00000034575	Tent4a	432	725	695	465	464	773	575.689	-0.0777979	0.0674898	-1.13665	0.255687	0.99983
ENSMUSG00000022139	Mbnl2	2829	4680	5260	3580	2593	5905	3962.2	-0.077586	0.0675039	-1.16458	0.244188	0.99983
ENSMUSG00000045007	Tubg2	187	284	274	196	187	266	229.127	-0.0775644	0.0639786	-1.20913	0.226614	0.99983
ENSMUSG00000052713	Zfp608	455	645	715	544	395	732	566.983	-0.0775332	0.0673598	-1.18036	0.237858	0.99983
ENSMUSG00000024810	Il33	38	84	129	41	45	87	65.8728	-0.0775269	0.0474865	-1.53214	0.125488	0.99983
ENSMUSG00000042446	Zmym4	850	1175	1394	931	803	1500	1074.25	-0.0775166	0.0670906	-1.15883	0.246525	0.99983
ENSMUSG00000006342	Susd2	34	49	46	17	14	37	31.8761	-0.0774757	0.0359992	-2.21624	0.0266749	0.99983
ENSMUSG00000031681	Smad1	183	326	391	190	211	403	269.929	-0.0774247	0.0650502	-1.17842	0.23863	0.99983
ENSMUSG00000032549	Rab6b	5132	9109	8564	6507	5087	9652	7115.2	-0.0774204	0.0673982	-1.14343	0.252862	0.99983
ENSMUSG00000073131	Vma21	256	504	514	346	268	499	383.272	-0.0773276	0.0648419	-1.17063	0.241749	0.99983
ENSMUSG00000018501	Ncor1	3567	6102	6302	4154	3791	7178	4989.98	-0.0773193	0.0662768	-1.15581	0.24776	0.99983
ENSMUSG00000034557	Zfyve9	1661	2277	2737	1810	1752	2712	2107.24	-0.0772674	0.0656117	-1.18015	0.237939	0.99983
ENSMUSG00000032816	Igdcc4	137	263	211	152	136	226	183.076	-0.07725	0.0604544	-1.23236	0.217816	0.99983
ENSMUSG00000039059	Hrh3	232	366	404	264	236	391	306.709	-0.0771882	0.0656908	-1.17275	0.240896	0.99983
ENSMUSG00000024241	Sos1	685	1120	1274	799	663	1435	952.075	-0.0771308	0.0675923	-1.14288	0.253089	0.99983
ENSMUSG00000039126	Prune2	455	748	782	511	436	898	613.599	-0.0771241	0.0672784	-1.14418	0.252551	0.99983
ENSMUSG00000021803	Cdhr1	57	107	110	46	50	111	76.0766	-0.0770976	0.0494983	-1.57084	0.11622	0.99983
ENSMUSG00000071176	Arhgef10	149	312	304	163	197	300	228.758	-0.0770932	0.0637718	-1.16381	0.244501	0.99983
ENSMUSG00000072620	Slfn2	70	55	105	39	40	86	63.7154	-0.0770715	0.0461721	-1.64036	0.10093	0.99983
ENSMUSG00000001687	Ubl3	1664	2136	3015	1668	1729	3067	2131.33	-0.0769926	0.0660759	-1.1677	0.242926	0.99983
ENSMUSG00000000142	Axin2	118	161	246	130	108	198	153.941	-0.0769672	0.0595383	-1.28884	0.197453	0.99983
ENSMUSG00000027104	Atf2	1103	1843	1892	1349	1025	2161	1504.45	-0.076955	0.0675918	-1.1445	0.252417	0.99983
ENSMUSG00000043587	Pxylp1	124	192	220	113	115	235	159.339	-0.0769186	0.0599694	-1.29399	0.195669	0.99983
ENSMUSG00000034297	Med13	1265	2085	2413	1462	1310	2698	1788.95	-0.0769125	0.0669653	-1.14397	0.252637	0.99983
ENSMUSG00000027400	Pdyn	47	79	80	35	38	69	56.0207	-0.076901	0.045476	-1.69182	0.0906798	0.99983
ENSMUSG00000050730	Arhgap42	53	105	96	53	49	80	70.5506	-0.0768813	0.0486908	-1.54704	0.121854	0.99983
ENSMUSG00000019978	Epb41l2	122	271	228	124	142	262	183.305	-0.0768662	0.0603448	-1.22257	0.22149	0.99983
ENSMUSG00000020362	Cnot6	302	484	556	315	293	636	410.884	-0.0768538	0.0665456	-1.16346	0.244644	0.99983
ENSMUSG00000074892	B3galt5	369	727	823	448	510	758	582.949	-0.0768425	0.0674772	-1.09335	0.274239	0.99983
ENSMUSG00000034310	Tmem132d	406	563	584	428	384	619	488.267	-0.0766892	0.0674068	-1.13433	0.256655	0.99983
ENSMUSG00000035596	Mboat7	911	1375	1443	1077	799	1637	1169.39	-0.0766778	0.0675876	-1.15036	0.249995	0.99983
ENSMUSG00000037709	Fam13a	170	339	303	196	196	310	244.904	-0.0766751	0.0637108	-1.1589	0.246495	0.99983
ENSMUSG00000039852	Rere	987	1862	1439	1273	919	1684	1331.08	-0.0766681	0.0669527	-1.13022	0.258385	0.99983
ENSMUSG00000041235	Chd7	83	189	160	93	88	164	124.359	-0.0766527	0.0555695	-1.30841	0.190735	0.99983
ENSMUSG00000034730	Adgrb1	3849	4715	5097	4177	3487	5373	4405.32	-0.076619	0.0639458	-1.19749	0.231115	0.99983
ENSMUSG00000057230	Aak1	5693	8654	9645	6519	5677	10761	7558.45	-0.0764101	0.0650189	-1.17544	0.23982	0.99983
ENSMUSG00000038860	Garnl3	295	544	513	344	319	553	414.42	-0.0763998	0.0664534	-1.12179	0.26195	0.99983
ENSMUSG00000029550	Sppl3	428	638	758	480	446	752	565.841	-0.0763596	0.0675616	-1.12853	0.259098	0.99983
ENSMUSG00000024867	Pip5k1b	334	524	574	425	285	585	440.212	-0.0763532	0.065952	-1.19633	0.231567	0.99983
ENSMUSG00000037339	Fam53a	162	198	232	140	139	238	180.666	-0.0763109	0.0614704	-1.23451	0.217013	0.99983
ENSMUSG00000056014	A430033K04Rik	238	290	419	238	228	376	289.492	-0.0762635	0.0652704	-1.16616	0.243548	0.99983
ENSMUSG00000024431	Nr3c1	1675	2270	2519	1678	1715	2760	2053.75	-0.0762455	0.0659256	-1.15297	0.248921	0.99983
ENSMUSG00000021061	Sptb	1722	1939	1918	1776	1416	2121	1816.59	-0.0761857	0.0660435	-1.12895	0.258917	0.99983
ENSMUSG00000025969	Nrp2	740	1214	1466	820	799	1618	1057.2	-0.0761847	0.0672849	-1.12877	0.258995	0.99983
ENSMUSG00000037730	Mynn	187	297	385	195	209	367	261.731	-0.0761403	0.0649769	-1.16112	0.245594	0.99983
ENSMUSG00000056019	Zfp709	120	234	225	135	127	227	171.52	-0.0761132	0.0602988	-1.22506	0.220551	0.99983
ENSMUSG00000018648	Dusp14	158	291	288	175	163	305	221.338	-0.0760617	0.0627795	-1.18616	0.235559	0.99983
ENSMUSG00000018412	Kansl1	598	937	965	657	574	1115	780.626	-0.0760543	0.067582	-1.12233	0.261723	0.99983
ENSMUSG00000036402	Gng12	112	201	212	115	103	230	154.45	-0.076011	0.0587831	-1.2901	0.197015	0.99983
ENSMUSG00000032532	Cck	2998	3682	4104	3659	2375	4260	3467.8	-0.0759687	0.0661519	-1.20319	0.228905	0.99983
ENSMUSG00000059742	Kcnh7	2183	2963	3554	2458	1924	4009	2749.9	-0.0759486	0.0661306	-1.16015	0.245987	0.99983
ENSMUSG00000037754	Ppp1r16b	761	1368	1454	958	834	1510	1105.81	-0.0759431	0.0675696	-1.10471	0.269283	0.99983
ENSMUSG00000027889	Ampd2	668	868	1092	678	637	1171	824.941	-0.0759355	0.067431	-1.12686	0.259804	0.99983
ENSMUSG00000006019	Dhx34	89	137	182	95	90	140	118.2	-0.0759205	0.0562817	-1.34297	0.179282	0.99983
ENSMUSG00000071064	Zfp827	456	722	776	521	441	852	606.402	-0.0759023	0.0674484	-1.12423	0.260914	0.99983
ENSMUSG00000032396	Dis3l	300	523	549	334	361	542	422.112	-0.0758251	0.067111	-1.11361	0.265448	0.99983
ENSMUSG00000060166	Zdhhc8	356	535	482	420	290	536	429.2	-0.0757441	0.0659895	-1.1684	0.242645	0.99983
ENSMUSG00000029407	Uso1	889	1669	1504	1068	965	1719	1260.92	-0.0757081	0.0675896	-1.0908	0.27536	0.99983
ENSMUSG00000024050	Wiz	131	250	158	160	86	181	158.966	-0.0756886	0.0541369	-1.39561	0.162832	0.99983
ENSMUSG00000067924	Rtl8b	191	260	361	241	150	320	244.973	-0.0756533	0.0631508	-1.25762	0.208528	0.99983
ENSMUSG00000041426	Hibch	111	205	237	103	121	255	162.381	-0.075641	0.0600889	-1.27223	0.203293	0.99983
ENSMUSG00000018559	Ctdnep1	137	235	164	167	111	160	162.573	-0.0756181	0.0583034	-1.32189	0.186205	0.99983
ENSMUSG00000041757	Plekha6	724	1024	937	769	653	1095	853.935	-0.0756094	0.0675812	-1.10263	0.270186	0.99983
ENSMUSG00000046844	Vat1l	399	502	645	433	354	645	482.833	-0.0755943	0.0674173	-1.13051	0.258261	0.99983
ENSMUSG00000028136	Snx27	1665	2756	2870	1919	1853	3088	2287.37	-0.0755454	0.0659406	-1.13613	0.255901	0.99983
ENSMUSG00000028172	Tacr3	114	162	144	90	109	148	126.624	-0.0755231	0.0570846	-1.30463	0.192018	0.99983
ENSMUSG00000066406	Akap13	310	534	571	291	413	582	435.906	-0.0754799	0.0670557	-1.1495	0.250348	0.99983
ENSMUSG00000024589	Nedd4l	1915	2803	3189	2371	1693	3439	2487.27	-0.0754489	0.0671187	-1.15141	0.249563	0.99983
ENSMUSG00000022262	Dnah5	102	105	153	86	68	143	106.381	-0.0754024	0.0552512	-1.3669	0.171657	0.99983
ENSMUSG00000022641	Bbx	537	824	890	610	528	960	702.787	-0.075369	0.0675918	-1.11422	0.265186	0.99983
ENSMUSG00000036902	Neto2	603	988	1351	673	696	1394	900.478	-0.0753666	0.0673006	-1.10671	0.268421	0.99983
ENSMUSG00000039671	Zmynd8	1197	2146	1962	1425	1277	2235	1657	-0.0753038	0.0674309	-1.09559	0.273258	0.99983
ENSMUSG00000020023	Tmcc3	258	564	528	316	338	543	408.659	-0.0752908	0.066411	-1.06836	0.285357	0.99983
ENSMUSG00000030753	Thap12	438	681	777	491	452	815	588.107	-0.0751983	0.0675614	-1.10852	0.267639	0.99983
ENSMUSG00000020893	Per1	533	1208	1180	681	678	1296	884.371	-0.0751941	0.0673897	-1.03905	0.29878	0.99983
ENSMUSG00000037887	Dusp8	938	1598	1465	1211	856	1618	1248.91	-0.0751359	0.0674318	-1.13201	0.25763	0.99983
ENSMUSG00000038056	Kmt2c	1611	2258	2368	1760	1585	2577	1985.96	-0.0751145	0.065793	-1.13918	0.254627	0.99983
ENSMUSG00000038894	Irs2	862	1442	1585	1048	901	1682	1208	-0.0751114	0.0674225	-1.10603	0.268712	0.99983
ENSMUSG00000021193	Pitrm1	254	381	385	247	228	459	314.625	-0.0750982	0.0650627	-1.15388	0.248551	0.99983
ENSMUSG00000045252	Zfp574	209	233	242	196	154	260	214.327	-0.07503	0.0631686	-1.16619	0.243537	0.99983
ENSMUSG00000055523	Gucy2g	68	78	85	53	33	86	65.6055	-0.0750284	0.0469918	-1.6349	0.102071	0.99983
ENSMUSG00000022421	Nptxr	6303	9807	10557	7386	6330	11718	8406.95	-0.074991	0.0653202	-1.14756	0.251148	0.99983
ENSMUSG00000028854	Slc9a1	257	470	394	318	242	428	343.504	-0.0748735	0.064449	-1.14827	0.250858	0.99983
ENSMUSG00000061601	Pclo	2674	3491	3030	3084	2246	3383	2986.76	-0.0748121	0.0661564	-1.14263	0.253192	0.99983
ENSMUSG00000043439	Epop	199	322	312	237	202	286	256.032	-0.0747252	0.0642385	-1.1796	0.238157	0.99983
ENSMUSG00000054863	Fam19a5	531	685	829	563	494	858	643.461	-0.0746785	0.067585	-1.10697	0.268309	0.99983
ENSMUSG00000024642	Tle4	492	939	1075	569	600	1162	765.617	-0.0745761	0.0675885	-1.07416	0.28275	0.99983
ENSMUSG00000003518	Dusp3	1150	1742	1858	1363	1088	2035	1494.87	-0.0745739	0.0672059	-1.11725	0.263889	0.99983
ENSMUSG00000025265	Fgd1	91	132	106	98	45	110	95.9449	-0.0745498	0.0501004	-1.57486	0.115289	0.99983
ENSMUSG00000059456	Ptk2b	11428	19435	20076	13406	12649	22259	15987	-0.0744991	0.0649171	-1.13618	0.255881	0.99983
ENSMUSG00000021215	Net1	278	355	441	278	254	451	333.315	-0.0744218	0.0663203	-1.12251	0.261645	0.99983
ENSMUSG00000062397	Zfp706	1165	1860	1814	1309	1147	2121	1523.03	-0.074389	0.067321	-1.09709	0.272604	0.99983
ENSMUSG00000038156	Spon1	2039	3055	3243	2182	2348	3327	2645.01	-0.0743634	0.0650066	-1.14607	0.251767	0.99983
ENSMUSG00000043496	Tril	60	206	170	48	101	207	122.318	-0.074222	0.0546975	-1.38976	0.1646	0.99983
ENSMUSG00000042348	Arl15	732	1110	1204	873	701	1277	955.106	-0.0741885	0.0675249	-1.10738	0.26813	0.99983
ENSMUSG00000052135	Foxo6	180	232	233	129	176	259	198.067	-0.0741369	0.0606286	-1.23208	0.217919	0.99983
ENSMUSG00000028439	Fam219a	622	1016	963	740	598	1074	814.269	-0.0741091	0.0675466	-1.09454	0.273718	0.99983
ENSMUSG00000102252	Snrpn	3337	5170	5702	4118	3278	6056	4469.7	-0.0739511	0.0662395	-1.12532	0.260455	0.99983
ENSMUSG00000044864	Ankrd50	565	732	891	570	548	939	688.33	-0.0739116	0.0675723	-1.09215	0.274768	0.99983
ENSMUSG00000030307	Slc6a11	197	350	307	196	202	364	260.717	-0.0738544	0.0637559	-1.13335	0.257068	0.99983
ENSMUSG00000021224	Numb	183	268	311	212	155	308	232.013	-0.0738542	0.0633335	-1.18947	0.234256	0.99983
ENSMUSG00000022634	Yaf2	428	753	830	494	474	896	618.809	-0.0738061	0.0675213	-1.07496	0.282393	0.99983
ENSMUSG00000024887	Asah2	82	109	184	69	74	166	107.262	-0.0737551	0.0553251	-1.34591	0.178332	0.99983
ENSMUSG00000024921	Smarca2	2238	2967	3991	2240	2396	4145	2889.13	-0.0736811	0.0655548	-1.13012	0.258425	0.99983
ENSMUSG00000031513	Leprotl1	483	709	795	547	448	865	620.689	-0.0736661	0.0675368	-1.09707	0.272611	0.99983
ENSMUSG00000064325	Hhip	64	134	134	68	59	133	93.677	-0.0736125	0.0519162	-1.38857	0.164965	0.99983
ENSMUSG00000033540	Idua	36	89	75	25	43	68	53.5011	-0.0734939	0.0445376	-1.64212	0.100566	0.99983
ENSMUSG00000039623	Ap5z1	111	200	205	116	117	205	153.237	-0.073455	0.0596915	-1.20783	0.227114	0.99983
ENSMUSG00000037196	Pacrg	55	81	72	42	47	57	58.8212	-0.0733401	0.0464544	-1.57877	0.11439	0.99983
ENSMUSG00000026014	Raph1	812	1291	1448	933	832	1590	1108.17	-0.0733296	0.0673277	-1.08528	0.277798	0.99983
ENSMUSG00000051495	Irf2bp2	552	670	1004	558	524	1014	691.88	-0.0733233	0.0675797	-1.08333	0.278662	0.99983
ENSMUSG00000028909	Ptpru	917	1345	1367	1028	953	1420	1152.27	-0.0732734	0.0668609	-1.09738	0.272477	0.99983
ENSMUSG00000064065	Ipcef1	479	731	899	562	478	926	652.924	-0.0732677	0.0675828	-1.08377	0.278468	0.99983
ENSMUSG00000036098	Myrf	73	216	128	99	69	138	116.591	-0.0732348	0.0499865	-1.30785	0.190926	0.99983
ENSMUSG00000033596	Rfwd3	307	377	482	283	265	542	362.45	-0.0731142	0.0662796	-1.11041	0.266822	0.99983
ENSMUSG00000047959	Kcna3	48	95	75	37	55	61	61.0219	-0.073055	0.0470035	-1.5475	0.121743	0.99983
ENSMUSG00000002221	Paxip1	357	445	525	377	336	501	417.544	-0.0729871	0.0670786	-1.09688	0.272693	0.99983
ENSMUSG00000021476	Habp4	956	1299	1409	1088	864	1522	1164.5	-0.0729862	0.0671046	-1.0977	0.272336	0.99983
ENSMUSG00000024143	Rhoq	139	223	242	144	138	244	182.115	-0.0729292	0.0617409	-1.17256	0.240972	0.99983
ENSMUSG00000015968	Cacna1d	347	630	634	408	369	700	495.027	-0.0728863	0.0668947	-1.06761	0.285697	0.99983
ENSMUSG00000042197	Zfp451	1003	1447	1743	1139	979	1873	1316.17	-0.0728765	0.0668237	-1.09378	0.27405	0.99983
ENSMUSG00000015846	Rxra	249	304	363	239	218	378	285.281	-0.0728573	0.065421	-1.10854	0.267627	0.99983
ENSMUSG00000028124	Gclm	332	641	670	415	396	673	501.767	-0.0727176	0.0670495	-1.04615	0.295493	0.99983
ENSMUSG00000063297	Luzp2	765	1206	1544	894	728	1746	1086.43	-0.0726501	0.0675593	-1.08568	0.277623	0.99983
ENSMUSG00000034751	Mast4	731	1362	1237	846	785	1472	1034.17	-0.072626	0.0675681	-1.0475	0.294869	0.99983
ENSMUSG00000048988	Elfn1	99	177	184	119	99	158	135.596	-0.0725659	0.057535	-1.25723	0.20867	0.99983
ENSMUSG00000040037	Negr1	1469	1965	2836	1630	1440	2944	1957.26	-0.072523	0.0656048	-1.10559	0.268906	0.99983
ENSMUSG00000017144	Rnd3	161	179	277	150	136	256	186.672	-0.0724838	0.0619191	-1.1649	0.244059	0.99983
ENSMUSG00000034157	Cipc	564	1033	1067	747	558	1139	818.541	-0.0724365	0.0670573	-1.07543	0.282182	0.99983
ENSMUSG00000032177	Pde4a	630	1188	967	834	651	1027	867.309	-0.0723771	0.067194	-1.07167	0.28387	0.99983
ENSMUSG00000029505	Ep400	1584	2153	2203	1830	1479	2323	1903.91	-0.0723102	0.0660801	-1.1074	0.268123	0.99983
ENSMUSG00000018661	Cog1	571	802	837	602	517	972	697.568	-0.0722374	0.0675796	-1.06588	0.286478	0.99983
ENSMUSG00000026737	Pip4k2a	262	475	423	302	226	521	353.792	-0.0722069	0.0634838	-1.13216	0.257567	0.99983
ENSMUSG00000032564	Cpne4	593	1264	1593	738	760	1735	1039.23	-0.0721032	0.0675906	-1.00515	0.314825	0.99983
ENSMUSG00000042082	Arsb	501	746	768	576	451	858	632.431	-0.0720681	0.0674455	-1.07603	0.281913	0.99983
ENSMUSG00000054226	Tprkb	254	407	496	302	290	437	353.681	-0.0719937	0.066136	-1.08263	0.278974	0.99983
ENSMUSG00000010066	Cacna2d2	133	224	177	121	110	228	160.574	-0.0719629	0.0576515	-1.21785	0.22328	0.99983
ENSMUSG00000042249	Grk3	625	922	1065	641	675	1150	818.624	-0.0718918	0.0674359	-1.06755	0.285725	0.99983
ENSMUSG00000025742	Prps2	359	505	654	420	320	673	469.518	-0.0718604	0.0671432	-1.08672	0.277162	0.99983
ENSMUSG00000019947	Arid5b	498	878	828	607	483	945	683.304	-0.0718488	0.0670569	-1.06141	0.288504	0.99983
ENSMUSG00000003949	Hlf	917	1590	1567	1138	920	1747	1270.24	-0.0718246	0.0675914	-1.05578	0.291067	0.99983
ENSMUSG00000021708	Rasgrf2	1064	1384	1883	1052	1100	1983	1358.53	-0.0717901	0.066826	-1.07999	0.280146	0.99983
ENSMUSG00000034908	Sidt2	519	800	862	606	505	926	681.902	-0.0717714	0.0675749	-1.06442	0.287139	0.99983
ENSMUSG00000036606	Plxnb2	479	742	765	509	528	809	623.48	-0.0717665	0.0675917	-1.05573	0.291091	0.99983
ENSMUSG00000020919	Stat5b	149	194	258	142	125	269	181.698	-0.0717236	0.0617015	-1.17639	0.239438	0.99983
ENSMUSG00000021130	Galnt16	2975	4266	5080	3343	3012	5476	3893.62	-0.0716229	0.064512	-1.11087	0.266623	0.99983
ENSMUSG00000034813	Grip1	266	349	492	255	273	485	339.741	-0.0715926	0.0662129	-1.08497	0.277933	0.99983
ENSMUSG00000040761	Spen	782	1235	1200	918	770	1327	1014.08	-0.0715522	0.0675227	-1.05763	0.290223	0.99983
ENSMUSG00000039841	Zfp800	151	271	317	169	163	323	221.303	-0.071493	0.0632282	-1.10936	0.267276	0.99983
ENSMUSG00000040282	BC052040	59	78	73	50	32	70	59.3885	-0.0713966	0.0456374	-1.58479	0.113014	0.99983
ENSMUSG00000018326	Ywhab	5229	10338	9136	6962	5433	10473	7661.05	-0.071391	0.0675903	-1.03022	0.302905	0.99983
ENSMUSG00000064367	mt-Nd5	21	133	63	38	32	47	53.4895	-0.0713661	0.0386354	-1.4312	0.152374	0.99983
ENSMUSG00000046532	Ar	669	857	980	711	589	1085	795.36	-0.0713587	0.0675069	-1.05814	0.28999	0.99983
ENSMUSG00000032773	Chrm1	2373	3659	3660	2918	2153	4136	3066.43	-0.0713551	0.0672377	-1.07764	0.281194	0.99983
ENSMUSG00000031523	Dlc1	474	851	854	528	554	944	676.097	-0.0713081	0.0675893	-1.03558	0.300398	0.99983
ENSMUSG00000027495	Fam210b	271	410	358	300	245	395	325.593	-0.071071	0.0655986	-1.07395	0.282847	0.99983
ENSMUSG00000048251	Bcl11b	3069	4262	4867	3348	3084	5291	3879.95	-0.0710225	0.0643458	-1.10285	0.270091	0.99983
ENSMUSG00000051851	Rtl8c	171	241	253	198	148	235	204.829	-0.0709377	0.0625438	-1.16924	0.242306	0.99983
ENSMUSG00000036241	Ube2r2	294	504	495	388	277	492	398.244	-0.0708349	0.0654153	-1.10731	0.268159	0.99983
ENSMUSG00000026179	Pnkd	1281	2097	1988	1715	1112	2165	1685.19	-0.0708138	0.0674583	-1.09717	0.272566	0.99983
ENSMUSG00000020593	Lpin1	135	289	280	152	139	328	208.317	-0.0707955	0.0604431	-1.14204	0.253437	0.99983
ENSMUSG00000055044	Pdlim1	33	61	68	31	21	49	41.9251	-0.0707423	0.0402651	-1.77774	0.0754461	0.99983
ENSMUSG00000050069	Grem2	185	278	294	207	166	302	232.399	-0.0707339	0.0635849	-1.11916	0.263071	0.99983
ENSMUSG00000061578	Ksr2	1215	1912	1788	1429	1115	2108	1554.05	-0.0706549	0.067548	-1.04578	0.295664	0.99983
ENSMUSG00000022799	Arhgap31	139	295	271	134	154	339	209.862	-0.0706545	0.0608835	-1.16094	0.245666	0.99983
ENSMUSG00000020594	Pum2	2073	2946	3792	2446	2134	3781	2767.06	-0.0706508	0.0653706	-1.08237	0.279088	0.99983
ENSMUSG00000033740	St18	193	407	491	207	265	524	326.434	-0.0705645	0.0660287	-1.04453	0.296242	0.99983
ENSMUSG00000030683	Sez6l2	3149	4922	4445	3905	2843	5078	3981.61	-0.0705527	0.0673039	-1.06415	0.287259	0.99983
ENSMUSG00000034780	B3galt1	478	814	768	620	435	832	640.373	-0.0704855	0.0666537	-1.07687	0.281539	0.99983
ENSMUSG00000001855	Nup214	295	447	451	323	265	513	371.204	-0.0704393	0.066071	-1.0657	0.286558	0.99983
ENSMUSG00000074093	Svip	206	328	375	212	234	372	278.481	-0.0704322	0.0654005	-1.07152	0.283934	0.99983
ENSMUSG00000041710	Trpc5	780	890	1203	782	670	1308	910.376	-0.0704129	0.067353	-1.04068	0.298025	0.99983
ENSMUSG00000090015	Gm15446	109	261	261	137	141	258	184.916	-0.0703532	0.0605007	-1.07125	0.284057	0.99983
ENSMUSG00000043415	Otud1	164	237	223	165	143	243	192.345	-0.0703442	0.0619655	-1.12172	0.261983	0.99983
ENSMUSG00000024122	Pdpk1	2516	3517	4487	2799	2595	4699	3315.36	-0.0702998	0.0644709	-1.09025	0.275604	0.99983
ENSMUSG00000005698	Ctcf	801	1155	1289	861	832	1381	1024.99	-0.0702806	0.0670593	-1.04599	0.295566	0.99983
ENSMUSG00000034254	Agpat1	509	659	862	549	456	924	636.072	-0.0702798	0.0675918	-1.04772	0.294767	0.99983
ENSMUSG00000034265	Zdhhc14	301	437	408	359	252	431	360.001	-0.0702419	0.0657784	-1.09767	0.272349	0.99983
ENSMUSG00000064351	mt-Co1	106	413	360	169	159	396	247.441	-0.0701823	0.05711	-0.949884	0.342171	0.99983
ENSMUSG00000027244	Atg13	486	973	808	564	572	943	702.735	-0.0701654	0.0673973	-0.99411	0.320169	0.99983
ENSMUSG00000063919	Srrm4	217	497	333	280	206	410	314.388	-0.0701551	0.0605874	-1.07211	0.28367	0.99983
ENSMUSG00000051730	Mettl5	111	122	197	112	80	174	127.847	-0.0700749	0.0578	-1.22916	0.219013	0.99983
ENSMUSG00000048826	Dact2	542	619	694	612	414	725	595.407	-0.0700732	0.06757	-1.06913	0.285012	0.99983
ENSMUSG00000045875	Adra1a	90	136	186	94	90	156	120.455	-0.0700717	0.0568852	-1.22091	0.222119	0.99983
ENSMUSG00000097789	Gm2115	2081	2909	3304	2532	1809	3621	2631.52	-0.0700331	0.0668103	-1.07523	0.282273	0.99983
ENSMUSG00000061451	Tmem151a	1116	1762	1725	1345	1117	1867	1455.91	-0.070017	0.0671947	-1.04511	0.295971	0.99983
ENSMUSG00000024940	Ltbp3	34	86	56	34	45	28	47.5408	-0.0700159	0.0419461	-1.73987	0.0818826	0.99983
ENSMUSG00000040265	Dnm3	1045	1644	1922	1186	998	2269	1439.52	-0.0699997	0.0674521	-1.0483	0.294501	0.99983
ENSMUSG00000034659	Tmem109	187	295	305	222	194	273	242.117	-0.0699602	0.0639094	-1.11255	0.265904	0.99983
ENSMUSG00000048304	Slitrk3	1171	1789	1974	1485	1070	2109	1550.51	-0.0698598	0.0675001	-1.06036	0.288981	0.99983
ENSMUSG00000028328	Tmod1	83	98	145	80	62	122	95.1712	-0.069842	0.0537729	-1.31143	0.189712	0.99983
ENSMUSG00000036158	Prickle1	1161	1616	1742	1337	1119	1832	1439.5	-0.069815	0.0665685	-1.05749	0.290289	0.99983
ENSMUSG00000070934	Rraga	440	944	760	605	469	835	656.085	-0.0697778	0.0657533	-1.01644	0.309421	0.99983
ENSMUSG00000027134	Lpcat4	201	322	327	264	185	293	260.981	-0.0697384	0.0632912	-1.1575	0.247067	0.99983
ENSMUSG00000019990	Pde7b	63	165	162	77	77	158	110.339	-0.0696959	0.0538832	-1.19136	0.233514	0.99983
ENSMUSG00000024064	Galnt14	301	426	496	315	314	493	381.038	-0.0696835	0.0668605	-1.04202	0.297402	0.99983
ENSMUSG00000039809	Gabbr2	3369	5371	5129	4071	3185	5946	4393.75	-0.0696482	0.067049	-1.0414	0.29769	0.99983
ENSMUSG00000021054	Sgpp1	267	383	450	290	247	479	340.673	-0.0696281	0.0662273	-1.05637	0.290798	0.99983
ENSMUSG00000029651	Mtus2	589	904	896	689	538	1018	751.839	-0.0696162	0.0675209	-1.03607	0.300168	0.99983
ENSMUSG00000019256	Ahr	171	189	247	157	131	257	187.028	-0.0695755	0.061982	-1.11939	0.262974	0.99983
ENSMUSG00000034926	Dhcr24	681	990	1035	676	767	1101	857.559	-0.0695717	0.0674381	-1.03284	0.301681	0.99983
ENSMUSG00000040710	St8sia4	246	366	506	266	272	478	340.916	-0.0695578	0.0663508	-1.03752	0.299496	0.99983
ENSMUSG00000051527	Usp29	347	417	676	344	331	668	442.732	-0.0695365	0.0671364	-1.03276	0.301715	0.99983
ENSMUSG00000017721	Pigt	336	538	524	388	334	562	436.472	-0.069528	0.066891	-1.03403	0.301122	0.99983
ENSMUSG00000039943	Plcb4	221	371	418	214	275	428	309.504	-0.0695199	0.065881	-1.06333	0.287632	0.99983
ENSMUSG00000041740	Rnf10	945	1750	1568	1124	1082	1767	1334.54	-0.0694398	0.0674098	-1.00225	0.316222	0.99983
ENSMUSG00000039835	Nhsl1	533	744	899	498	574	990	681.613	-0.0694064	0.0675843	-1.04297	0.296961	0.99983
ENSMUSG00000046753	Ccdc66	118	161	202	127	102	182	144.537	-0.0693647	0.059217	-1.18568	0.235748	0.99983
ENSMUSG00000055491	Pprc1	116	170	177	122	103	169	140.001	-0.0692942	0.0588153	-1.18248	0.237014	0.99983
ENSMUSG00000021730	Hcn1	1927	2665	3633	2282	1881	3711	2578.31	-0.069292	0.0655431	-1.06052	0.288906	0.99983
ENSMUSG00000044700	Tmem201	433	623	669	503	385	726	541.994	-0.0692091	0.0673228	-1.04243	0.297215	0.99983
ENSMUSG00000039270	Megf9	1922	2610	3113	2351	1649	3352	2425.04	-0.0691765	0.0667478	-1.06767	0.285671	0.99983
ENSMUSG00000041617	Ccdc74a	70	110	127	75	67	96	88.8669	-0.0691257	0.0523207	-1.33427	0.182116	0.99983
ENSMUSG00000059495	Arhgef12	3560	4759	5622	4052	3489	5824	4445.64	-0.0691244	0.0640963	-1.084	0.278363	0.99983
ENSMUSG00000038831	Ralgps1	415	754	639	541	348	752	557.97	-0.0690658	0.0646699	-1.08312	0.278754	0.99983
ENSMUSG00000042763	Maneal	292	518	469	369	274	511	394.641	-0.0690131	0.065214	-1.05711	0.290463	0.99983
ENSMUSG00000048490	Nrip1	1447	2116	2326	1664	1319	2692	1862.71	-0.068967	0.0670888	-1.03678	0.299836	0.99983
ENSMUSG00000033595	Lgi3	823	1195	1538	897	866	1630	1111.58	-0.0689527	0.0668859	-1.03058	0.302736	0.99983
ENSMUSG00000109336	Samd4b	269	481	438	353	275	428	366.986	-0.0688954	0.0653521	-1.06528	0.28675	0.99983
ENSMUSG00000058488	Kl	384	546	561	384	382	627	469.76	-0.068868	0.0672657	-1.01497	0.310122	0.99983
ENSMUSG00000067336	Bmpr2	4409	9344	7232	4867	6089	8635	6587.72	-0.0688254	0.0657858	-1.01312	0.311002	0.99983
ENSMUSG00000034656	Cacna1a	1506	2415	2237	1913	1372	2506	1948.72	-0.068739	0.0675714	-1.03808	0.299234	0.99983
ENSMUSG00000038705	Gmeb2	225	327	332	260	199	338	275.084	-0.0687326	0.0647815	-1.07883	0.280664	0.99983
ENSMUSG00000023026	Dip2b	1554	2352	2499	1805	1529	2789	2027.48	-0.0686587	0.0665729	-1.03232	0.301923	0.99983
ENSMUSG00000037573	Tob1	165	273	242	208	137	244	207.941	-0.0686404	0.0608987	-1.16234	0.245098	0.99983
ENSMUSG00000040373	Cacng5	87	112	167	82	77	143	107.032	-0.0686366	0.055405	-1.23637	0.216321	0.99983
ENSMUSG00000032452	Clstn2	3092	4485	5476	3336	3442	5729	4121.22	-0.0685781	0.0641245	-1.07047	0.284409	0.99983
ENSMUSG00000026826	Nr4a2	682	1462	1328	916	809	1439	1065.52	-0.0684953	0.0673613	-0.959054	0.337531	0.99983
ENSMUSG00000035653	Lrfn5	1025	1478	1827	1128	1001	2051	1360.1	-0.0684593	0.0668451	-1.02951	0.303238	0.99983
ENSMUSG00000027227	Sord	96	165	177	106	94	168	129.763	-0.0684069	0.0575395	-1.17574	0.2397	0.99983
ENSMUSG00000043079	Synpo	1550	2263	2164	1884	1480	2282	1914.6	-0.0684052	0.0666988	-1.04732	0.294952	0.99983
ENSMUSG00000027858	Tspan2	142	432	345	164	231	409	271.568	-0.0683545	0.0632157	-0.95916	0.337478	0.99983
ENSMUSG00000037579	Kcnh3	940	1300	1373	1071	834	1549	1150.26	-0.06835	0.0673404	-1.02347	0.306085	0.99983
ENSMUSG00000029108	Pcdh7	1567	2272	2586	1778	1486	2937	2032.36	-0.0683325	0.0665309	-1.03191	0.302114	0.99983
ENSMUSG00000069729	Arid1b	2246	6966	3635	2441	4168	4752	3952.29	-0.0682493	0.0674143	-0.90542	0.365243	0.99983
ENSMUSG00000061576	Dpp6	5136	7179	8553	5890	5000	9281	6625.91	-0.0682194	0.0641149	-1.06785	0.285587	0.99983
ENSMUSG00000002012	Pnck	627	831	966	631	658	993	767.881	-0.0681212	0.0675324	-1.00844	0.313244	0.99983
ENSMUSG00000027002	Nckap1	12522	18412	23952	14146	13540	25257	17242.5	-0.0681123	0.0627019	-1.08403	0.278354	0.99983
ENSMUSG00000045777	Ifitm10	70	121	100	70	67	90	85.4511	-0.0681114	0.0519991	-1.29014	0.197002	0.99983
ENSMUSG00000033949	Trim36	57	90	115	64	41	94	73.6322	-0.0680957	0.0488307	-1.42972	0.152799	0.99983
ENSMUSG00000036357	Gpr101	396	598	748	395	477	746	540.295	-0.0680622	0.0674837	-1.0176	0.308867	0.99983
ENSMUSG00000023942	Slc29a1	36	71	77	26	38	63	49.4697	-0.0680465	0.0436933	-1.5663	0.117278	0.99983
ENSMUSG00000010175	Prox1	473	984	1240	603	600	1312	814.138	-0.06803	0.0675531	-0.940914	0.346749	0.99983
ENSMUSG00000061887	Ssbp3	493	553	715	520	393	764	559.418	-0.0679449	0.0675611	-1.0117	0.311682	0.99983
ENSMUSG00000039568	Ubald1	202	370	242	259	153	284	249.389	-0.0679379	0.0594664	-1.14018	0.254212	0.99983
ENSMUSG00000049872	Calhm5	171	203	217	146	138	246	183.385	-0.0678722	0.0611635	-1.08769	0.276734	0.99983
ENSMUSG00000033295	Ptprf	787	1065	964	806	712	1158	904.338	-0.0678357	0.0675595	-0.97613	0.329	0.99983
ENSMUSG00000041258	Zfp236	494	807	801	623	475	849	657.708	-0.0676211	0.067307	-1.01673	0.309282	0.99983
ENSMUSG00000035342	Lzts2	220	223	259	196	181	252	221.886	-0.0675795	0.0630994	-1.04224	0.297301	0.99983
ENSMUSG00000037795	N4bp2	32	73	70	20	33	66	46.1866	-0.0675792	0.0419335	-1.65369	0.0981903	0.99983
ENSMUSG00000056602	Fry	4937	6122	7018	5347	4193	8163	5815.1	-0.06756	0.0649696	-1.03921	0.298705	0.99983
ENSMUSG00000040007	Bahd1	537	772	833	597	530	890	676.729	-0.0675507	0.0675836	-0.999827	0.317394	0.99983
ENSMUSG00000031925	Maml2	74	164	155	85	75	162	113.304	-0.067538	0.0541529	-1.19688	0.231354	0.99983
ENSMUSG00000030879	Mrpl17	211	296	316	227	185	337	255.671	-0.0674316	0.0644918	-1.05026	0.293599	0.99983
ENSMUSG00000035621	Midn	283	487	476	297	272	594	384.118	-0.0674139	0.0653717	-1.03159	0.302263	0.99983
ENSMUSG00000033768	Nrxn2	2261	3526	3117	2606	2392	3428	2855.1	-0.0673773	0.065589	-1.02155	0.306994	0.99983
ENSMUSG00000013539	Tango2	264	443	422	278	329	414	352.594	-0.0673749	0.0665612	-1.01056	0.312228	0.99983
ENSMUSG00000002496	Tsc2	1265	1782	1817	1395	1193	2077	1553.65	-0.0673748	0.0667614	-1.00543	0.314691	0.99983
ENSMUSG00000026933	Camsap1	2164	3187	3519	2474	2240	3778	2816.64	-0.0672885	0.0651622	-1.03265	0.301766	0.99983
ENSMUSG00000021488	Nsd1	4601	6203	7189	4943	4467	8082	5744.16	-0.0672766	0.0641281	-1.04768	0.294787	0.99983
ENSMUSG00000033257	Ttll4	127	197	245	119	144	235	171.042	-0.0672481	0.061175	-1.10436	0.269436	0.99983
ENSMUSG00000067242	Lgi1	969	1593	1956	1198	988	2120	1401.72	-0.0672007	0.0673939	-0.991888	0.321252	0.99983
ENSMUSG00000001985	Grik3	536	923	845	671	592	853	724.584	-0.0671813	0.0675708	-0.995658	0.319416	0.99983
ENSMUSG00000020892	Aloxe3	56	86	122	52	57	92	74.3761	-0.0671642	0.0498985	-1.3341	0.182172	0.99983
ENSMUSG00000046321	Hs3st2	74	135	119	92	56	108	95.1597	-0.0671574	0.0511726	-1.34595	0.17832	0.99983
ENSMUSG00000041119	Pde9a	83	119	159	85	86	118	105.684	-0.0670801	0.0545615	-1.23743	0.215926	0.99983
ENSMUSG00000038608	Dock10	819	1237	2034	885	896	2192	1251.53	-0.0670697	0.066692	-1.01245	0.311322	0.99983
ENSMUSG00000034612	Chst11	648	977	1081	740	676	1136	852.101	-0.067059	0.0674165	-0.993387	0.320522	0.99983
ENSMUSG00000029192	Tbc1d14	627	1638	989	819	829	1210	996.109	-0.0670579	0.0665952	-0.86235	0.388495	0.99983
ENSMUSG00000013236	Ptprs	10651	16264	16721	12431	11148	18222	13907.3	-0.0670267	0.0639758	-1.04682	0.295181	0.99983
ENSMUSG00000037169	Mycn	63	91	78	59	35	81	66.6214	-0.0670265	0.0466111	-1.46173	0.143814	0.99983
ENSMUSG00000051627	Hist1h1e	372	478	517	401	317	564	433.235	-0.0670165	0.0670932	-1.00388	0.315438	0.99983
ENSMUSG00000025920	Stau2	763	1248	1570	942	835	1593	1108.93	-0.0669863	0.0673475	-0.97988	0.327146	0.99983
ENSMUSG00000040260	Daam2	122	287	272	144	152	299	201.751	-0.0669772	0.0611881	-1.02169	0.306926	0.99983
ENSMUSG00000061589	Dot1l	152	296	210	174	137	256	199.48	-0.066973	0.0593669	-1.06787	0.285578	0.99983
ENSMUSG00000022010	Tsc22d1	3606	4362	5845	4207	3138	6035	4404.84	-0.066941	0.0644088	-1.0547	0.291564	0.99983
ENSMUSG00000037331	Larp1	1241	2119	2005	1547	1322	2159	1691.47	-0.0669239	0.0672507	-0.990093	0.322129	0.99983
ENSMUSG00000021097	Clmn	373	721	651	511	344	723	534.961	-0.0668959	0.0647912	-1.03544	0.300464	0.99983
ENSMUSG00000026062	Slc9a2	252	323	443	210	260	473	313.449	-0.066879	0.0650579	-1.06189	0.288284	0.99983
ENSMUSG00000032501	Trib1	95	145	126	82	63	163	108.281	-0.0668518	0.0523121	-1.29446	0.195508	0.99983
ENSMUSG00000051790	Nlgn2	2206	3583	3074	2687	2018	3685	2816.67	-0.0668347	0.0675414	-0.987865	0.323219	0.99983
ENSMUSG00000094786	Gm14403	56	79	106	59	43	78	68.0478	-0.0668306	0.0482682	-1.41083	0.158296	0.99983
ENSMUSG00000050967	Creg2	2211	3780	3897	2680	2415	4297	3106.76	-0.0667766	0.0664182	-0.993436	0.320497	0.99983
ENSMUSG00000022377	Asap1	2092	2975	2700	2491	1683	3275	2492.18	-0.0667314	0.0675465	-1.00642	0.314215	0.99983
ENSMUSG00000030889	Vwa3a	43	62	84	35	36	62	51.6961	-0.0667252	0.0444579	-1.50375	0.132646	0.99983
ENSMUSG00000019132	BC005537	957	2042	1867	1186	1085	2290	1496.62	-0.066657	0.0674053	-0.940469	0.346977	0.99983
ENSMUSG00000078429	Ctdsp2	351	557	528	415	324	589	449.674	-0.0665843	0.0665626	-1.00211	0.316289	0.99983
ENSMUSG00000040865	Ino80d	470	761	776	567	438	877	626.853	-0.0665825	0.0671827	-0.996191	0.319157	0.99983
ENSMUSG00000045287	Rtn4rl1	699	1089	1126	794	722	1242	919.243	-0.0665727	0.0674394	-0.981727	0.326235	0.99983
ENSMUSG00000003534	Ddr1	265	428	488	295	287	506	364.559	-0.0665018	0.0666045	-0.988737	0.322792	0.99983
ENSMUSG00000034430	Zxdc	328	545	553	386	311	628	442.293	-0.0664749	0.0663641	-0.999427	0.317588	0.99983
ENSMUSG00000039652	Cpeb3	895	1640	1538	1079	1002	1740	1273.98	-0.0664473	0.0674992	-0.9595	0.337307	0.99983
ENSMUSG00000035829	Ppp1r26	221	337	361	194	235	420	283.809	-0.0663935	0.0646766	-1.04818	0.294556	0.99983
ENSMUSG00000002279	Lmf1	106	164	151	102	100	156	127.477	-0.0663569	0.0575905	-1.13326	0.257103	0.99983
ENSMUSG00000000374	Trappc10	1416	2055	2261	1476	1478	2575	1819.98	-0.066277	0.06621	-1.0002	0.317215	0.99983
ENSMUSG00000036285	Noa1	123	224	186	127	121	214	161.232	-0.0662262	0.059282	-1.07777	0.281135	0.99983
ENSMUSG00000031778	Cx3cl1	9508	12609	13675	11435	8016	15307	11508	-0.0661825	0.0656723	-1.03473	0.300794	0.99983
ENSMUSG00000032511	Scn5a	40	53	62	29	24	51	41.868	-0.0661785	0.0410032	-1.63565	0.101912	0.99983
ENSMUSG00000032086	Bace1	1067	1640	1745	1175	1079	2026	1406.49	-0.066149	0.0670658	-0.983613	0.325306	0.99983
ENSMUSG00000052727	Map1b	18624	23988	29049	19203	17938	33054	22921.8	-0.0659862	0.0635217	-1.03636	0.300033	0.99983
ENSMUSG00000090061	Nwd2	654	997	1044	660	666	1262	849.256	-0.0659673	0.0675884	-0.978707	0.327725	0.99983
ENSMUSG00000026034	Clk1	164	260	478	197	206	378	263.879	-0.0659432	0.0635803	-0.951221	0.341492	0.99983
ENSMUSG00000037111	Setd7	2029	2873	3415	2260	1877	3994	2633.94	-0.0659038	0.0663652	-1.00236	0.316171	0.99983
ENSMUSG00000022382	Wnt7b	253	387	363	270	247	402	314.031	-0.0658749	0.0657189	-0.988348	0.322982	0.99983
ENSMUSG00000006464	Bbs1	615	815	1017	641	603	1093	771.803	-0.0658385	0.0674812	-0.976395	0.328869	0.99983
ENSMUSG00000001119	Col6a1	43	65	83	40	38	54	52.469	-0.065833	0.0443577	-1.49625	0.134588	0.99983
ENSMUSG00000033061	Resp18	210	326	398	298	176	350	284.227	-0.0657758	0.062725	-1.13436	0.256643	0.99983
ENSMUSG00000027544	Nfatc2	90	334	168	90	159	234	172.124	-0.0657683	0.057199	-0.953223	0.340477	0.99983
ENSMUSG00000019027	Dnah1	66	126	148	77	69	127	97.6854	-0.0657577	0.0534023	-1.19802	0.230909	0.99983
ENSMUSG00000024873	Cnih2	1060	1554	1754	1318	1027	1789	1381.45	-0.0657561	0.06717	-0.999127	0.317733	0.99983
ENSMUSG00000036699	Zcchc12	273	409	515	285	318	493	369.63	-0.0657395	0.0666452	-0.985067	0.324591	0.99983
ENSMUSG00000054874	Pcnx3	614	825	883	697	569	930	740.502	-0.0657051	0.0675419	-0.983193	0.325513	0.99983
ENSMUSG00000032010	Usp2	416	582	597	505	344	642	504.548	-0.0656926	0.0669482	-1.01942	0.308005	0.99983
ENSMUSG00000031112	Stk26	99	147	150	91	85	163	118.761	-0.065677	0.0562781	-1.16303	0.244817	0.99983
ENSMUSG00000044906	4930503L19Rik	51	76	77	43	41	66	57.8088	-0.0656746	0.046184	-1.41865	0.156002	0.99983
ENSMUSG00000039686	Zer1	2523	4183	3771	2784	2834	4367	3336.79	-0.0656482	0.0656375	-0.984882	0.324682	0.99983
ENSMUSG00000052387	Trpm3	523	778	1118	526	628	1131	746.091	-0.0656426	0.067567	-0.982041	0.32608	0.99983
ENSMUSG00000006705	Pknox1	172	249	282	191	158	282	216.278	-0.0656294	0.063299	-1.04421	0.296388	0.99983
ENSMUSG00000030201	Lrp6	847	1097	1363	832	843	1510	1047.32	-0.065614	0.0672581	-0.97779	0.328178	0.99983
ENSMUSG00000024456	Diaph1	622	1017	1014	738	715	1014	837.202	-0.0656006	0.067478	-0.971406	0.331346	0.99983
ENSMUSG00000026494	Kif26b	251	429	439	285	271	470	345.874	-0.0655646	0.0661482	-0.97474	0.329689	0.99983
ENSMUSG00000040606	Kazn	180	318	305	187	211	324	246.939	-0.0655149	0.0644485	-0.997515	0.318514	0.99983
ENSMUSG00000025931	Paqr8	505	835	1003	584	541	1099	726.03	-0.0654972	0.067592	-0.960811	0.336647	0.99983
ENSMUSG00000029636	Wasf3	570	930	927	674	570	1041	762.075	-0.0654745	0.0675688	-0.963312	0.335391	0.99983
ENSMUSG00000085795	Zfp703	72	128	104	84	58	96	89.1038	-0.0654679	0.0511914	-1.28653	0.198258	0.99983
ENSMUSG00000031029	Eif3f	342	641	496	434	354	545	461.506	-0.0654571	0.0660772	-0.967452	0.333318	0.99983
ENSMUSG00000030203	Dusp16	46	98	97	37	44	105	66.8505	-0.0654511	0.047109	-1.41227	0.157871	0.99983
ENSMUSG00000029090	Adgra3	192	290	289	186	190	326	238.85	-0.0653683	0.0638938	-1.01326	0.310935	0.99983
ENSMUSG00000034252	Senp6	818	1354	1630	953	955	1691	1183.7	-0.0653431	0.0669184	-0.962431	0.335833	0.99983
ENSMUSG00000027217	Tspan18	74	141	126	75	62	143	99.0838	-0.0653381	0.0521624	-1.23851	0.215529	0.99983
ENSMUSG00000037486	Asxl2	279	353	393	302	220	435	322.806	-0.0653206	0.0657624	-1.00941	0.312777	0.99983
ENSMUSG00000027651	Rprd1b	299	390	458	295	261	527	359.339	-0.0653117	0.0662734	-0.990162	0.322095	0.99983
ENSMUSG00000030876	Mettl9	145	278	272	197	135	269	208.621	-0.0652718	0.0601062	-1.09037	0.275552	0.99983
ENSMUSG00000021709	Erbin	238	664	609	278	369	736	452.333	-0.0652701	0.0659709	-0.903982	0.366005	0.99983
ENSMUSG00000034684	Sema3f	54	70	81	56	32	61	58.1228	-0.0652435	0.0456103	-1.50964	0.131135	0.99983
ENSMUSG00000029238	Clock	1301	1842	2374	1391	1400	2516	1736.13	-0.0652376	0.0658946	-0.991434	0.321474	0.99983
ENSMUSG00000033319	Fem1c	311	450	512	358	278	554	397.279	-0.0651167	0.0665706	-0.991499	0.321442	0.99983
ENSMUSG00000002222	Rmnd5a	1637	2360	2998	1774	1779	3183	2202.75	-0.0650868	0.0653154	-0.997069	0.318731	0.99983
ENSMUSG00000057396	Zfp759	116	143	213	123	101	181	141.556	-0.0649675	0.0588559	-1.1102	0.266911	0.99983
ENSMUSG00000038020	Rapgefl1	1990	2749	2814	2242	1971	3024	2429.14	-0.0649578	0.0652652	-0.997173	0.318681	0.99983
ENSMUSG00000057409	Zfp53	55	77	85	41	49	73	61.9502	-0.0649451	0.0471141	-1.38551	0.165898	0.99983
ENSMUSG00000045671	Spred2	360	689	574	494	324	644	500.384	-0.0649336	0.064354	-1.01738	0.308974	0.99983
ENSMUSG00000026773	Pfkfb3	138	373	282	177	190	315	236.238	-0.0649288	0.0616218	-0.919642	0.35776	0.99983
ENSMUSG00000034312	Iqsec1	2527	4099	3684	3030	2369	4446	3275.48	-0.0648964	0.067416	-0.957943	0.338092	0.99983
ENSMUSG00000053310	Nrgn	5089	6110	6879	6483	3837	7221	5863.89	-0.0647763	0.0664644	-1.05736	0.290347	0.99983
ENSMUSG00000016346	Kcnq2	6058	9796	9717	6791	7080	10577	8144.85	-0.064741	0.0634233	-1.01561	0.309813	0.99983
ENSMUSG00000058318	Phf21a	285	413	481	312	269	521	367.063	-0.0647122	0.0665243	-0.976549	0.328792	0.99983
ENSMUSG00000078235	Fam43b	118	221	173	131	110	198	154.622	-0.0647026	0.0581147	-1.06844	0.285324	0.99983
ENSMUSG00000022463	Srebf2	1982	2383	2603	2136	1849	2706	2259.19	-0.0646394	0.0653348	-0.987892	0.323205	0.99983
ENSMUSG00000001419	Mef2d	1506	2769	2250	1874	1544	2685	2055.31	-0.0646318	0.0675926	-0.929666	0.352544	0.99983
ENSMUSG00000028920	Fbxo42	352	568	597	401	363	653	473.308	-0.0645978	0.0671704	-0.953764	0.340203	0.99983
ENSMUSG00000030386	Zfp606	161	202	284	141	156	287	197.193	-0.0645493	0.0621864	-1.0492	0.294084	0.99983
ENSMUSG00000035772	Mrps2	125	190	206	135	111	212	158.107	-0.0645466	0.0599154	-1.08056	0.279892	0.99983
ENSMUSG00000087598	Zfp111	156	231	259	167	152	258	198.234	-0.0644962	0.0626931	-1.02761	0.304133	0.99983
ENSMUSG00000034685	Fam171a2	1057	1110	1491	1064	956	1454	1173.38	-0.0644508	0.0673528	-0.942386	0.345995	0.99983
ENSMUSG00000001436	Slc19a1	66	86	102	70	40	89	73.6537	-0.0643777	0.049107	-1.37968	0.167684	0.99983
ENSMUSG00000040488	Ltbp4	137	221	144	132	112	188	154.499	-0.0643077	0.0574875	-1.02952	0.303234	0.99983
ENSMUSG00000048022	Tmem229a	165	337	307	188	194	342	245.782	-0.0642651	0.0634999	-0.965078	0.334506	0.99983
ENSMUSG00000037151	Lrrc20	164	262	269	197	169	245	213.922	-0.0642639	0.0628642	-1.03713	0.299674	0.99983
ENSMUSG00000000794	Kcnn3	148	257	231	174	118	270	192.874	-0.0642342	0.0592084	-1.09399	0.273962	0.99983
ENSMUSG00000031691	Tnpo2	1981	2514	2994	2240	1850	3131	2400.68	-0.0642178	0.0651769	-0.992415	0.320995	0.99983
ENSMUSG00000021519	Mterf3	100	137	131	102	75	134	111.597	-0.0642082	0.055476	-1.16394	0.244448	0.99983
ENSMUSG00000005417	Mprip	2626	3318	3800	2875	2359	4257	3133.6	-0.0641852	0.0650133	-0.9867	0.32379	0.99983
ENSMUSG00000038014	Fam120a	1170	1690	1815	1285	1130	2102	1486.7	-0.0641404	0.0668979	-0.95747	0.33833	0.99983
ENSMUSG00000022311	Csmd3	945	1190	1924	983	969	1940	1261.68	-0.0639976	0.0669085	-0.953127	0.340526	0.99983
ENSMUSG00000022419	Deptor	201	376	330	227	246	340	280.727	-0.0639283	0.0652254	-0.951063	0.341573	0.99983
ENSMUSG00000047085	Lrrc4b	1442	1877	2214	1482	1542	2256	1767.86	-0.0639199	0.0663702	-0.963955	0.335068	0.99983
ENSMUSG00000027999	Pla2g12a	88	147	129	85	83	137	108.984	-0.0638953	0.0551885	-1.13018	0.258401	0.99983
ENSMUSG00000074939	Chrm5	46	79	109	53	30	93	64.2028	-0.0638838	0.0459548	-1.4441	0.148711	0.99983
ENSMUSG00000030093	Wnt7a	62	169	118	76	86	112	101.257	-0.0638737	0.0532909	-1.07636	0.281765	0.99983
ENSMUSG00000024260	Sap130	219	308	301	249	189	315	259.849	-0.0638665	0.0644544	-1.00601	0.31441	0.99983
ENSMUSG00000049800	Sertad2	171	322	306	222	155	332	242.06	-0.0638632	0.0613273	-1.04017	0.298262	0.99983
ENSMUSG00000032908	Sgpp2	94	134	153	105	89	119	114.289	-0.0638562	0.0557339	-1.18416	0.236351	0.99983
ENSMUSG00000031155	Pim2	139	329	276	176	161	312	222.237	-0.0638374	0.0607981	-0.964556	0.334767	0.99983
ENSMUSG00000079215	Zfp664	413	708	707	535	401	756	568.965	-0.0638019	0.0667805	-0.962427	0.335835	0.99983
ENSMUSG00000044768	D1Ertd622e	298	339	456	331	253	425	344.02	-0.063777	0.0663342	-0.983638	0.325293	0.99983
ENSMUSG00000021144	Mta1	295	552	414	340	309	496	393.337	-0.0637639	0.0656149	-0.92032	0.357406	0.99983
ENSMUSG00000028560	Usp1	293	425	492	323	288	517	377.659	-0.0636983	0.0667544	-0.955002	0.339576	0.99983
ENSMUSG00000055447	Cd47	1275	2511	2255	1710	1281	2651	1874.93	-0.0636814	0.0672351	-0.925644	0.354631	0.99983
ENSMUSG00000069171	Nr2f1	232	458	532	298	303	498	370.626	-0.0636583	0.0661168	-0.90876	0.363477	0.99983
ENSMUSG00000017210	Med24	971	1468	1623	1068	1058	1757	1285.52	-0.0636396	0.0666224	-0.952094	0.341049	0.99983
ENSMUSG00000006673	Qrich1	1232	1671	2127	1410	1165	2292	1591.25	-0.0636192	0.0663522	-0.965522	0.334283	0.99983
ENSMUSG00000055991	Zkscan5	165	252	251	157	160	289	205.887	-0.0636134	0.0624274	-1.01172	0.311674	0.99983
ENSMUSG00000056592	Zfp658	64	103	133	73	60	104	86.33	-0.063612	0.0517202	-1.22884	0.219133	0.99983
ENSMUSG00000074785	Plxnc1	710	1052	1209	777	753	1307	937.16	-0.0634341	0.0672306	-0.94153	0.346433	0.99983
ENSMUSG00000022687	Boc	175	219	241	177	132	271	197.593	-0.0634195	0.0620653	-1.03137	0.302369	0.99983
ENSMUSG00000062866	Phactr2	137	246	176	147	92	244	168.073	-0.0634115	0.0547036	-1.14993	0.250174	0.99983
ENSMUSG00000047787	Flrt1	428	696	585	478	430	684	541.008	-0.0634108	0.0672275	-0.91838	0.35842	0.99983
ENSMUSG00000021466	Ptch1	164	242	274	173	157	285	209.041	-0.0633832	0.0630996	-1.00347	0.315636	0.99983
ENSMUSG00000016386	Mpped2	264	490	466	334	250	533	374.571	-0.0633554	0.0644843	-0.972822	0.330642	0.99983
ENSMUSG00000033373	Fntb	202	283	290	225	176	304	242.135	-0.0633444	0.0640579	-0.999231	0.317683	0.99983
ENSMUSG00000024059	Clip4	501	839	820	573	541	918	678.662	-0.0633055	0.0675801	-0.92234	0.356351	0.99983
ENSMUSG00000027204	Fbn1	143	154	217	116	127	210	157.142	-0.0632704	0.0592441	-1.06069	0.288833	0.99983
ENSMUSG00000048175	Asb8	250	444	442	294	266	484	350.795	-0.0632677	0.0658437	-0.940565	0.346928	0.99983
ENSMUSG00000031374	Zfp92	54	56	82	36	40	64	54.1517	-0.0632195	0.0445606	-1.41699	0.156487	0.99983
ENSMUSG00000064105	Cnnm2	374	550	678	407	421	663	499.874	-0.0632123	0.0674421	-0.935208	0.349681	0.99983
ENSMUSG00000059149	Mfsd4a	526	676	826	565	475	903	642.295	-0.0631929	0.0675914	-0.93918	0.347638	0.99983
ENSMUSG00000047843	Bri3	55	88	81	37	62	69	64.5779	-0.0631445	0.0472222	-1.37991	0.167615	0.99983
ENSMUSG00000028527	Ak4	573	1048	1104	570	765	1259	849.611	-0.0631355	0.0675048	-0.95568	0.339234	0.99983
ENSMUSG00000026925	Inpp5e	126	217	155	136	109	183	152.413	-0.0631255	0.0579352	-1.03773	0.299397	0.99983
ENSMUSG00000042807	Hecw2	933	1109	1668	890	918	1780	1165.9	-0.0631248	0.0673209	-0.943484	0.345433	0.99983
ENSMUSG00000053414	Hunk	834	1069	1136	887	726	1323	975.406	-0.0630956	0.0674124	-0.930186	0.352275	0.99983
ENSMUSG00000043811	Rtn4r	405	608	640	469	368	725	519.528	-0.0630912	0.0671179	-0.947751	0.343256	0.99983
ENSMUSG00000029189	Sel1l3	979	1234	1526	1025	947	1628	1191.5	-0.0630198	0.0667952	-0.940955	0.346728	0.99983
ENSMUSG00000021360	Gcnt2	226	317	410	249	218	413	294.356	-0.0629978	0.0656658	-0.961995	0.336052	0.99983
ENSMUSG00000020546	Stxbp4	204	302	317	225	196	329	256.096	-0.0629963	0.064651	-0.974278	0.329919	0.99983
ENSMUSG00000039477	Tnrc18	803	1412	1113	1027	760	1302	1051.68	-0.0629379	0.0672667	-0.929103	0.352836	0.99983
ENSMUSG00000026927	Entr1	156	293	308	180	156	351	228.724	-0.0629352	0.0622367	-0.997715	0.318418	0.99983
ENSMUSG00000031987	Egln1	244	473	439	283	285	490	356.146	-0.0629112	0.0659203	-0.916638	0.359332	0.99983
ENSMUSG00000030657	Xylt1	838	1254	1456	987	863	1531	1118.68	-0.0628966	0.0671087	-0.938341	0.348069	0.99983
ENSMUSG00000022390	Zc3h7b	936	1400	1390	1162	854	1524	1186.09	-0.0628541	0.0675457	-0.95344	0.340367	0.99983
ENSMUSG00000003410	Elavl3	1431	2320	2278	1877	1412	2390	1909.7	-0.0628449	0.0674421	-0.955583	0.339283	0.99983
ENSMUSG00000015766	Eps8	126	234	260	153	135	258	186.072	-0.0628364	0.0611703	-0.999912	0.317353	0.99983
ENSMUSG00000051615	Rap2a	1241	1883	2174	1366	1307	2454	1672.5	-0.0628041	0.0663788	-0.946052	0.344122	0.99983
ENSMUSG00000033365	Ipo13	428	918	726	576	511	782	641.495	-0.0627881	0.0667312	-0.888233	0.374416	0.99983
ENSMUSG00000051590	Map3k19	41	96	95	54	47	63	64.0973	-0.0627654	0.0459521	-1.33343	0.182391	0.99983
ENSMUSG00000031976	Urb2	318	357	529	284	331	486	374.76	-0.0627227	0.0654436	-0.960285	0.336912	0.99983
ENSMUSG00000044433	Camsap3	230	355	345	244	224	389	290.313	-0.0627101	0.0651755	-0.950003	0.342111	0.99983
ENSMUSG00000027223	Mapk8ip1	1316	1875	1922	1513	1368	1985	1640.59	-0.0627019	0.0661157	-0.955948	0.339098	0.99983
ENSMUSG00000026620	Mark1	539	790	915	625	480	1052	704.948	-0.0626738	0.067509	-0.944658	0.344834	0.99983
ENSMUSG00000030067	Foxp1	1241	1881	2272	1497	1267	2408	1696.55	-0.0626459	0.066638	-0.941042	0.346683	0.99983
ENSMUSG00000058135	Gstm1	49	217	182	73	94	192	124.805	-0.0626378	0.053301	-0.878334	0.379762	0.99983
ENSMUSG00000027381	Bcl2l11	22	42	44	14	14	31	26.5319	-0.0626358	0.0341125	-1.86042	0.0628258	0.99983
ENSMUSG00000040463	Mybbp1a	349	645	593	419	376	675	493.097	-0.0626264	0.0667318	-0.910353	0.362636	0.99983
ENSMUSG00000030515	Tarsl2	574	737	1047	598	601	1031	738.229	-0.0626157	0.0675721	-0.924591	0.355179	0.99983
ENSMUSG00000049119	Fam110b	569	628	789	574	486	840	635.925	-0.0626062	0.0675918	-0.914442	0.360484	0.99983
ENSMUSG00000078161	Erich3	256	346	517	279	275	468	343.281	-0.0625385	0.066126	-0.935463	0.34955	0.99983
ENSMUSG00000040867	Begain	370	573	513	439	343	570	460.691	-0.0625368	0.0667737	-0.939085	0.347687	0.99983
ENSMUSG00000063065	Mapk3	192	371	333	242	188	374	273.482	-0.0625103	0.0627408	-0.971242	0.331428	0.99983
ENSMUSG00000059975	Zfp74	174	279	297	226	152	290	229.9	-0.0625003	0.0622161	-1.04354	0.296697	0.99983
ENSMUSG00000047773	Ankfn1	29	27	46	8	10	36	24.5846	-0.0623736	0.0317161	-2.14886	0.0316458	0.99983
ENSMUSG00000053483	Usp21	155	228	237	180	144	225	191.673	-0.0622879	0.0620376	-1.0242	0.305742	0.99983
ENSMUSG00000030102	Itpr1	17452	20050	26750	17607	17133	27376	20599.7	-0.0622628	0.0647294	-0.951115	0.341546	0.99983
ENSMUSG00000061410	Zcchc14	1233	1986	1967	1512	1279	2132	1644.87	-0.0620623	0.067051	-0.926324	0.354277	0.99983
ENSMUSG00000020422	Tns3	154	398	303	170	214	377	257.281	-0.062009	0.0627006	-0.901724	0.367204	0.99983
ENSMUSG00000074607	Tox2	87	192	104	118	53	120	111.018	-0.0619962	0.047792	-1.28753	0.197911	0.99983
ENSMUSG00000052105	Mtcl1	941	1214	1217	853	981	1395	1086.33	-0.0619633	0.0675393	-0.902491	0.366796	0.99983
ENSMUSG00000035954	Dock4	4474	6230	7699	5177	4515	8134	5847.07	-0.0619532	0.0638697	-0.97252	0.330792	0.99983
ENSMUSG00000036622	Atp13a2	1658	2106	2195	1786	1619	2318	1930.94	-0.0619412	0.0656452	-0.940789	0.346813	0.99983
ENSMUSG00000021339	Mrs2	494	763	821	577	489	904	653.697	-0.0618402	0.0675602	-0.915449	0.359956	0.99983
ENSMUSG00000097333	Zfp87	192	252	355	187	185	367	245.334	-0.0618231	0.0644357	-0.966287	0.333901	0.99983
ENSMUSG00000063952	Brpf3	226	344	335	220	228	390	282.694	-0.061812	0.0649473	-0.9406	0.34691	0.99983
ENSMUSG00000026834	Acvr1c	355	420	588	356	319	620	427.759	-0.0617028	0.0671295	-0.919252	0.357964	0.99983
ENSMUSG00000035614	Togaram1	1589	1958	2828	1659	1581	2929	2013.94	-0.0616302	0.065913	-0.932686	0.350982	0.99983
ENSMUSG00000030691	Fchsd2	298	488	468	328	294	551	391.882	-0.0616007	0.0662193	-0.917365	0.358951	0.99983
ENSMUSG00000038025	Phf2	285	512	438	361	269	497	383.892	-0.0615289	0.0648846	-0.939001	0.34773	0.99983
ENSMUSG00000035513	Ntng2	147	226	199	140	157	210	177.843	-0.0615116	0.0615513	-0.981112	0.326537	0.99983
ENSMUSG00000051486	Pcdhb11	133	168	265	147	106	258	170.71	-0.0614105	0.0610222	-1.02932	0.30333	0.99983
ENSMUSG00000022175	Lrp10	184	267	326	192	180	343	239.316	-0.0614098	0.0642684	-0.957094	0.33852	0.99983
ENSMUSG00000034601	2700049A03Rik	96	132	157	84	99	144	115.858	-0.0613881	0.0562662	-1.0984	0.272031	0.99983
ENSMUSG00000024245	Tmem178	615	837	967	664	596	1060	767.919	-0.0613708	0.0674986	-0.909305	0.363189	0.99983
ENSMUSG00000110185	Igip	487	729	839	559	486	910	645.69	-0.0613567	0.0675868	-0.908743	0.363486	0.99983
ENSMUSG00000053519	Kcnip1	37	88	88	39	37	82	58.3501	-0.0613519	0.0451983	-1.3054	0.191755	0.99983
ENSMUSG00000033054	Npat	234	375	450	279	223	484	325.683	-0.0613394	0.0654468	-0.941765	0.346313	0.99983
ENSMUSG00000005338	Cadm3	3329	4818	5054	4025	3092	5652	4224.31	-0.0613375	0.0661408	-0.941099	0.346654	0.99983
ENSMUSG00000049097	Ankrd34a	428	634	625	568	325	683	532.203	-0.0613042	0.0657353	-1.017	0.309156	0.99983
ENSMUSG00000041040	Fam117b	686	1323	1334	897	774	1457	1036.27	-0.0612857	0.0675489	-0.874962	0.381594	0.99983
ENSMUSG00000025425	St8sia5	522	870	732	622	485	885	671.068	-0.0612378	0.0669829	-0.89975	0.368253	0.99983
ENSMUSG00000043460	Elfn2	1128	1662	1689	1322	1105	1864	1430.64	-0.0611519	0.0669155	-0.917456	0.358904	0.99983
ENSMUSG00000052512	Nav2	335	713	496	459	320	596	475.405	-0.061149	0.0633111	-0.917818	0.358714	0.99983
ENSMUSG00000044715	Gskip	361	428	552	374	319	577	424.091	-0.0611321	0.0671577	-0.910373	0.362626	0.99983
ENSMUSG00000074634	Tmem267	69	149	153	87	81	135	107.95	-0.0610896	0.0543617	-1.06749	0.285752	0.99983
ENSMUSG00000078117	Gm16485	121	136	204	121	95	191	139.945	-0.0610877	0.058994	-1.04329	0.296816	0.99983
ENSMUSG00000079038	D130040H23Rik	45	129	123	50	71	114	83.9537	-0.0610857	0.0514415	-1.08252	0.279024	0.99983
ENSMUSG00000052040	Klf13	2050	2993	3370	2482	1969	3673	2675.36	-0.0610796	0.0662502	-0.932808	0.350919	0.99983
ENSMUSG00000056222	Spock1	1018	1871	1584	1310	993	1895	1404.82	-0.0610591	0.0673469	-0.891586	0.372615	0.99983
ENSMUSG00000020810	Cygb	204	275	377	229	204	344	263.72	-0.0609713	0.0647946	-0.943225	0.345566	0.99983
ENSMUSG00000069814	Ccdc92b	305	409	409	349	248	454	356.485	-0.0609698	0.0660215	-0.943317	0.345519	0.99983
ENSMUSG00000005610	Eif4g2	3718	7147	6748	4806	4147	7722	5508.94	-0.0609352	0.0673404	-0.875309	0.381406	0.99983
ENSMUSG00000043067	Dpy19l1	968	1151	1531	997	995	1467	1161.92	-0.0608647	0.0673732	-0.902859	0.366601	0.99983
ENSMUSG00000034997	Htr2a	84	129	157	89	74	153	109.676	-0.0608634	0.0554623	-1.10266	0.270173	0.99983
ENSMUSG00000040097	Flywch1	3146	4288	4658	3548	3310	4740	3893.18	-0.0607755	0.0643554	-0.951307	0.341448	0.99983
ENSMUSG00000037104	Socs5	535	1068	930	621	631	1126	788.903	-0.0607547	0.0674486	-0.860071	0.38975	0.99983
ENSMUSG00000030022	Adamts9	52	87	83	40	56	74	63.9558	-0.0607323	0.0476166	-1.28314	0.199441	0.99983
ENSMUSG00000019846	Lama4	70	96	73	41	63	83	70.7604	-0.0607249	0.0472667	-1.25947	0.20786	0.99983
ENSMUSG00000004071	Cdip1	1720	2333	2652	2034	1494	3010	2143.76	-0.0607244	0.0667576	-0.928777	0.353005	0.99983
ENSMUSG00000037386	Rims2	628	948	1094	714	609	1253	839.888	-0.0607228	0.0675765	-0.903188	0.366426	0.99983
ENSMUSG00000027351	Spred1	1338	2291	2678	1526	1669	2837	1973.44	-0.0607157	0.0656691	-0.913339	0.361064	0.99983
ENSMUSG00000022545	Ercc4	136	277	270	166	156	284	206.245	-0.0607145	0.0618537	-0.934557	0.350017	0.99983
ENSMUSG00000023805	Synj2	1666	2452	2739	1732	1831	3087	2181.38	-0.0606606	0.0657338	-0.925151	0.354888	0.99983
ENSMUSG00000005672	Kit	1658	2256	2613	1820	1690	2796	2086.14	-0.0605128	0.0654286	-0.924578	0.355186	0.99983
ENSMUSG00000027198	Ext2	324	499	467	373	297	536	406.744	-0.0604222	0.0663319	-0.907809	0.363979	0.99983
ENSMUSG00000040188	Scamp2	53	55	89	44	24	86	55.5538	-0.0603639	0.0448034	-1.44609	0.148151	0.99983
ENSMUSG00000035246	Pcyt1b	384	603	666	454	389	714	517.514	-0.0603586	0.0673328	-0.894979	0.370798	0.99983
ENSMUSG00000017679	Ttpal	641	991	1205	705	711	1305	889.048	-0.0603393	0.067312	-0.893901	0.371375	0.99983
ENSMUSG00000028382	Ptbp3	312	511	713	330	340	811	470.65	-0.0603261	0.0671845	-0.916716	0.359291	0.99983
ENSMUSG00000042688	Mapk6	376	528	675	433	370	687	493.89	-0.0603258	0.0674118	-0.898944	0.368683	0.99983
ENSMUSG00000037461	Ints7	235	322	406	238	243	412	299.453	-0.0602976	0.0657671	-0.917396	0.358935	0.99983
ENSMUSG00000038530	Rgs4	4622	4917	6995	4965	3795	7530	5321.63	-0.0602678	0.0637979	-0.937962	0.348264	0.99983
ENSMUSG00000002897	Il17ra	98	131	137	89	82	145	111.181	-0.0601653	0.0557071	-1.07167	0.283869	0.99983
ENSMUSG00000035849	Krt222	365	479	665	412	362	640	471.173	-0.0601292	0.0673204	-0.894924	0.370828	0.99983
ENSMUSG00000036087	Slain2	119	197	232	124	124	243	165.418	-0.060123	0.060693	-0.985188	0.324532	0.99983
ENSMUSG00000022556	Hsf1	123	211	231	167	131	181	170.804	-0.0599536	0.0591735	-1.05517	0.291345	0.99983
ENSMUSG00000006281	Tep1	37	39	50	23	24	32	34.0199	-0.0599234	0.0377401	-1.60299	0.108938	0.99983
ENSMUSG00000055675	Kbtbd11	2252	2804	3483	2532	2167	3547	2739.45	-0.0598647	0.0649892	-0.926411	0.354232	0.99983
ENSMUSG00000021136	Smoc1	20	68	49	15	27	44	35.2334	-0.0598509	0.0379698	-1.49484	0.134956	0.99983
ENSMUSG00000046607	Hrk	497	557	858	518	493	768	599.833	-0.0597948	0.0673169	-0.881703	0.377937	0.99983
ENSMUSG00000031425	Plp1	1649	4708	4634	2081	2669	5645	3320.94	-0.0597715	0.0675593	-0.775024	0.438326	0.99983
ENSMUSG00000041261	Car8	26	52	44	16	22	37	31.7172	-0.0597507	0.0366536	-1.62914	0.103283	0.99983
ENSMUSG00000050357	Carmil2	53	106	75	63	45	67	67.5426	-0.0597493	0.0469378	-1.25466	0.209602	0.99983
ENSMUSG00000031540	Kat6a	941	1467	1733	1130	990	1850	1302.02	-0.0597251	0.067016	-0.887999	0.374541	0.99983
ENSMUSG00000068663	Clec16a	1033	1680	1619	1210	1037	1909	1373.44	-0.0596981	0.0674555	-0.876488	0.380765	0.99983
ENSMUSG00000027748	Trpc4	870	1155	1452	1003	791	1578	1103.43	-0.0596915	0.067125	-0.901057	0.367558	0.99983
ENSMUSG00000022211	Carmil3	316	452	496	354	293	545	397.82	-0.0596813	0.0667512	-0.898794	0.368763	0.99983
ENSMUSG00000030123	Plxnd1	556	650	563	537	422	738	575.224	-0.0596774	0.0669695	-0.824361	0.409735	0.99983
ENSMUSG00000037940	Inpp4b	91	166	192	101	97	193	133.327	-0.0596769	0.0578942	-1.00911	0.312922	0.99983
ENSMUSG00000034173	Zbed5	101	175	182	115	96	188	137.581	-0.0596733	0.0578226	-1.02187	0.306842	0.99983
ENSMUSG00000025427	Rnf165	504	941	694	630	458	889	670.075	-0.059653	0.0654793	-0.876478	0.38077	0.99983
ENSMUSG00000032485	Scap	837	1040	1355	936	846	1277	1028.13	-0.0595943	0.0673394	-0.894156	0.371239	0.99983
ENSMUSG00000023994	Nfya	172	280	266	194	159	300	222.034	-0.0595581	0.0626158	-0.942525	0.345924	0.99983
ENSMUSG00000026426	Arl8a	919	1367	1511	1067	892	1709	1203.9	-0.0594815	0.0672646	-0.887619	0.374746	0.99983
ENSMUSG00000026797	Stxbp1	5127	8968	7795	6561	5644	8459	6973.67	-0.0594717	0.0664435	-0.892451	0.372151	0.99983
ENSMUSG00000015597	Zfp318	526	768	983	612	542	1015	713.067	-0.0594399	0.0675639	-0.878661	0.379585	0.99983
ENSMUSG00000021012	Zc3h14	708	1010	1287	824	675	1409	945.321	-0.0594346	0.0674124	-0.889614	0.373673	0.99983
ENSMUSG00000058756	Thra	5049	7374	8574	6030	5341	8838	6684.03	-0.0594111	0.0641183	-0.930738	0.351989	0.99983
ENSMUSG00000034336	Ina	1676	2555	2333	1965	1606	2738	2105.59	-0.0593522	0.0670278	-0.880537	0.378568	0.99983
ENSMUSG00000024858	Grk2	1717	2412	2863	1886	1841	3021	2226.19	-0.05934	0.0652816	-0.908942	0.363381	0.99983
ENSMUSG00000020642	Rnf144a	126	148	183	132	90	186	140.749	-0.0593176	0.0588087	-1.03807	0.29924	0.99983
ENSMUSG00000008489	Elavl2	484	875	911	590	522	1039	706.071	-0.0592569	0.0674223	-0.859768	0.389917	0.99983
ENSMUSG00000002068	Ccne1	99	153	153	84	93	179	122.252	-0.0592503	0.056197	-1.06197	0.288247	0.99983
ENSMUSG00000025733	Rhot2	218	236	339	235	191	291	247.963	-0.0592389	0.063943	-0.944277	0.345028	0.99983
ENSMUSG00000026090	2010300C02Rik	6479	8203	9186	7574	5812	9883	7726.75	-0.0592341	0.0638899	-0.94138	0.34651	0.99983
ENSMUSG00000074733	Zfp950	146	287	260	153	158	319	210.78	-0.0591971	0.0615367	-0.937793	0.348351	0.99983
ENSMUSG00000042817	Flt3	59	77	109	53	52	89	70.7306	-0.0591933	0.0492802	-1.20116	0.22969	0.99983
ENSMUSG00000059409	Ppp2r5d	898	1438	1517	1119	951	1583	1218.48	-0.0591505	0.0673025	-0.88193	0.377815	0.99983
ENSMUSG00000020483	Dynll2	768	900	967	865	676	976	856.737	-0.0591073	0.0673545	-0.898134	0.369114	0.99983
ENSMUSG00000024773	Atg2a	425	675	587	448	462	676	536.997	-0.059104	0.0674481	-0.854022	0.393093	0.99983
ENSMUSG00000020092	Pald1	69	143	139	79	83	128	103.215	-0.0590887	0.0544767	-1.03765	0.299434	0.99983
ENSMUSG00000030987	Stim1	870	1105	1202	957	816	1280	1024.24	-0.0590713	0.0670281	-0.883372	0.377035	0.99983
ENSMUSG00000103749	Pcdhgb5	70	103	118	73	64	100	86.0407	-0.0590601	0.0522025	-1.13983	0.254358	0.99983
ENSMUSG00000032437	Stt3b	1621	2299	2707	1829	1669	2920	2109.02	-0.0589749	0.0655202	-0.90052	0.367843	0.99983
ENSMUSG00000024211	Grm8	279	296	398	283	221	413	308.313	-0.0589551	0.0659252	-0.892145	0.372315	0.99983
ENSMUSG00000050567	Maml1	72	151	121	101	54	117	99.906	-0.0589503	0.0496431	-1.21976	0.222556	0.99983
ENSMUSG00000042523	Dnal1	1075	1757	1753	1336	1131	1890	1453.37	-0.0589348	0.0672293	-0.876565	0.380723	0.99983
ENSMUSG00000041997	Tlk1	845	1262	1555	996	830	1722	1151.8	-0.0589205	0.0672739	-0.880514	0.378581	0.99983
ENSMUSG00000039968	Rsbn1l	187	427	352	249	191	424	291.618	-0.0589123	0.0610607	-0.90186	0.367131	0.99983
ENSMUSG00000047904	Sstr2	97	125	148	77	79	170	111.458	-0.0588931	0.0549073	-1.09692	0.272677	0.99983
ENSMUSG00000050558	Prokr2	58	82	92	55	36	95	66.9543	-0.058893	0.047323	-1.29084	0.19676	0.99983
ENSMUSG00000035545	Leng8	148	213	223	137	143	251	180.508	-0.0588801	0.0613594	-0.955745	0.339201	0.99983
ENSMUSG00000032528	Vipr1	187	232	292	178	160	325	221.133	-0.0588688	0.0633719	-0.935149	0.349712	0.99983
ENSMUSG00000001229	Dpp9	626	1231	994	795	682	1173	892.64	-0.0588517	0.0672459	-0.833605	0.404503	0.99983
ENSMUSG00000021877	Arf4	567	1346	1163	833	671	1292	938.977	-0.05883	0.06603	-0.807501	0.419378	0.99983
ENSMUSG00000040785	Ttc3	19096	25596	31784	20124	19718	35206	24426.6	-0.058797	0.0629485	-0.935246	0.349661	0.99983
ENSMUSG00000034714	Ttyh2	34	114	106	40	57	98	70.2837	-0.0587603	0.0483351	-1.06695	0.285996	0.99983
ENSMUSG00000051323	Pcdh19	1488	2227	2547	1658	1646	2735	1988.11	-0.0587548	0.0655667	-0.894199	0.371215	0.99983
ENSMUSG00000022265	Ank	945	1434	1473	1094	955	1652	1226.65	-0.0586227	0.0671358	-0.870979	0.383766	0.99983
ENSMUSG00000020650	Bcap29	260	445	470	337	236	517	362.854	-0.0586199	0.0647022	-0.921611	0.356731	0.99983
ENSMUSG00000030352	Tspan9	520	810	826	541	584	930	682.957	-0.0585992	0.0675855	-0.861852	0.388769	0.99983
ENSMUSG00000024383	Map3k2	433	738	848	500	512	897	628.733	-0.058523	0.0675905	-0.849857	0.395405	0.99983
ENSMUSG00000028649	Macf1	1958	2952	3142	2111	2068	3668	2567.06	-0.0584937	0.0658294	-0.886024	0.375604	0.99983
ENSMUSG00000000296	Tpd52l1	117	146	277	125	124	213	159.362	-0.0584656	0.0589598	-0.947939	0.343161	0.99983
ENSMUSG00000068615	Gjd2	40	35	86	20	29	61	42.5701	-0.0584608	0.0396996	-1.47508	0.140192	0.99983
ENSMUSG00000028488	Sh3gl2	1755	3265	2468	2308	1809	2864	2375.82	-0.0584176	0.0675901	-0.848001	0.396437	0.99983
ENSMUSG00000039470	Zdhhc2	546	822	1049	626	595	1083	756.074	-0.0583991	0.067505	-0.859309	0.39017	0.99983
ENSMUSG00000035640	Cbarp	1408	2294	1816	1795	1324	2085	1771.14	-0.0583946	0.0675798	-0.874804	0.38168	0.99983
ENSMUSG00000031870	Pgr	375	494	583	457	305	617	459.524	-0.058379	0.0668989	-0.916883	0.359204	0.99983
ENSMUSG00000018476	Kdm6b	86	246	151	122	105	165	142.061	-0.0583579	0.0545891	-0.907222	0.364289	0.99983
ENSMUSG00000058881	Zfp516	142	210	254	122	160	268	185.28	-0.0583148	0.0614644	-0.977719	0.328213	0.99983
ENSMUSG00000050556	Kcnb1	2389	3172	3303	2794	2052	3813	2863.39	-0.0582918	0.0663978	-0.891385	0.372722	0.99983
ENSMUSG00000020653	Klf11	51	50	50	41	28	38	43.8406	-0.058287	0.0418875	-1.4105	0.158393	0.99983
ENSMUSG00000036611	Eepd1	243	320	421	258	257	388	306.703	-0.0582013	0.065629	-0.89003	0.37345	0.99983
ENSMUSG00000063281	Zfp35	146	308	312	178	186	324	231.92	-0.0581784	0.0632921	-0.862365	0.388486	0.99983
ENSMUSG00000004677	Myo9b	179	318	275	164	207	338	239.237	-0.0580925	0.0632342	-0.910986	0.362303	0.99983
ENSMUSG00000014905	Dnajb9	300	423	479	365	250	518	377.675	-0.058086	0.0660138	-0.915548	0.359904	0.99983
ENSMUSG00000052565	Hist1h1d	319	353	429	325	288	413	351.91	-0.0580575	0.0663297	-0.875581	0.381258	0.99983
ENSMUSG00000049336	Tenm2	5193	6838	7709	6036	4763	8500	6362.51	-0.0580494	0.064334	-0.911404	0.362082	0.99983
ENSMUSG00000058331	Zfp85	59	91	120	61	48	113	77.9345	-0.0579899	0.0503984	-1.16535	0.243876	0.99983
ENSMUSG00000044674	Fzd1	91	156	142	99	84	151	117.295	-0.0579411	0.0557891	-1.01936	0.308034	0.99983
ENSMUSG00000027522	Stx16	625	756	1021	625	606	1085	761.69	-0.0579272	0.0675527	-0.855007	0.392547	0.99983
ENSMUSG00000015944	Castor2	778	1437	1271	1016	819	1433	1095.78	-0.0578677	0.0675027	-0.841311	0.400174	0.99983
ENSMUSG00000026156	B3gat2	45	76	91	40	46	77	60.0113	-0.057861	0.0468316	-1.2289	0.219108	0.99983
ENSMUSG00000028524	Sgip1	1570	2871	2671	1981	1645	3159	2236.88	-0.0578587	0.0675653	-0.837256	0.402449	0.99983
ENSMUSG00000030091	Nup210	398	637	684	456	431	738	540.066	-0.0578136	0.0674888	-0.848509	0.396155	0.99983
ENSMUSG00000003469	Phyhip	5342	7821	7770	6399	4874	9119	6725.31	-0.0577926	0.0664192	-0.878918	0.379446	0.99983
ENSMUSG00000056851	Pcbp2	492	965	806	666	492	933	704.703	-0.0577693	0.0661049	-0.852932	0.393697	0.99983
ENSMUSG00000042439	Zfp532	1415	4061	3098	1381	2744	3992	2652.94	-0.0577295	0.0671925	-0.919889	0.357631	0.99983
ENSMUSG00000055013	Agap1	1362	1986	2079	1589	1357	2290	1737.01	-0.0577148	0.066416	-0.871649	0.3834	0.99983
ENSMUSG00000041245	Wnk3	654	854	1181	708	660	1218	846.982	-0.0577134	0.0673627	-0.856208	0.391883	0.99983
ENSMUSG00000027288	Zfp106	2114	3111	3707	2189	2539	3886	2836.18	-0.0577129	0.0654037	-0.892376	0.372191	0.99983
ENSMUSG00000033676	Gabrb3	4363	6350	7940	5238	4072	9079	5905.77	-0.057644	0.0659846	-0.88669	0.375246	0.99983
ENSMUSG00000038776	Ephx1	172	186	265	172	137	263	193.874	-0.0576397	0.0625229	-0.923889	0.355544	0.99983
ENSMUSG00000038255	Neurod2	1120	1768	2044	1365	1186	2187	1554.4	-0.0576113	0.0668504	-0.858534	0.390597	0.99983
ENSMUSG00000039089	L3mbtl3	245	365	374	269	240	408	309.242	-0.0576056	0.0657585	-0.871133	0.383681	0.99983
ENSMUSG00000032402	Smad3	1170	1660	1728	1297	1103	2038	1459.89	-0.0575738	0.0670396	-0.856314	0.391824	0.99983
ENSMUSG00000024588	Fech	433	692	752	540	450	774	589.617	-0.0574596	0.0674475	-0.855292	0.39239	0.99983
ENSMUSG00000039239	Tgfb2	260	565	460	297	316	574	395.93	-0.0574581	0.0654107	-0.819224	0.412659	0.99983
ENSMUSG00000055980	Irs1	315	400	470	350	282	485	375.874	-0.0574562	0.0667934	-0.871913	0.383256	0.99983
ENSMUSG00000068154	Insm1	72	86	78	75	46	67	71.4429	-0.0574558	0.0491402	-1.23145	0.218154	0.99983
ENSMUSG00000071477	Zfp777	239	312	371	260	253	325	290.22	-0.0574557	0.065078	-0.906615	0.364611	0.99983
ENSMUSG00000025586	Cpeb1	336	574	635	375	415	658	481.737	-0.057441	0.067413	-0.839143	0.401389	0.99983
ENSMUSG00000022946	Dop1b	1032	1303	1387	1103	926	1592	1202.66	-0.0574311	0.0669785	-0.849025	0.395867	0.99983
ENSMUSG00000050211	Pla2g4e	40	47	69	32	27	52	43.1051	-0.0574239	0.0416485	-1.38878	0.164899	0.99983
ENSMUSG00000067925	Rtl8a	57	97	105	71	49	82	74.9847	-0.0574054	0.0489237	-1.2083	0.226934	0.99983
ENSMUSG00000022052	Ppp2r2a	693	1422	1285	983	739	1427	1053.2	-0.0574045	0.0667489	-0.831312	0.405797	0.99983
ENSMUSG00000015806	Qdpr	141	320	289	198	215	226	227.942	-0.0573896	0.0616472	-0.914187	0.360618	0.99983
ENSMUSG00000045071	E130308A19Rik	77	107	123	86	59	111	91.6518	-0.0573834	0.052726	-1.12446	0.260819	0.99983
ENSMUSG00000019261	Map1s	636	998	828	747	661	910	791.683	-0.0573682	0.0675671	-0.843725	0.398823	0.99983
ENSMUSG00000020623	Map2k6	268	350	455	262	292	442	335.633	-0.0572808	0.0659762	-0.872926	0.382703	0.99983
ENSMUSG00000030894	Tpp1	254	455	408	310	227	501	346.203	-0.0571814	0.0636735	-0.892528	0.37211	0.99983
ENSMUSG00000052798	Nup107	258	277	382	229	233	396	288.631	-0.0571755	0.0647959	-0.86812	0.385329	0.99983
ENSMUSG00000029705	Cux1	412	559	510	498	283	629	473.475	-0.0571626	0.0652295	-0.93179	0.351445	0.99983
ENSMUSG00000055026	Gabrg3	292	484	478	364	268	540	391.555	-0.0571607	0.0655148	-0.880847	0.378401	0.99983
ENSMUSG00000039199	Zdhhc1	91	146	151	94	89	153	117.148	-0.0570996	0.0565197	-0.999738	0.317437	0.99983
ENSMUSG00000025666	Tmem47	311	543	625	327	327	779	457.148	-0.0570511	0.0664603	-0.88342	0.37701	0.99983
ENSMUSG00000038733	Wdr26	1469	2261	2584	1671	1589	2865	2000.34	-0.0570194	0.0659132	-0.862013	0.38868	0.99983
ENSMUSG00000020536	Llgl1	150	395	314	220	197	328	257.742	-0.0570068	0.0612173	-0.810492	0.417658	0.99983
ENSMUSG00000041685	Fcho2	166	258	301	172	164	338	222.975	-0.0569895	0.0633364	-0.905229	0.365344	0.99983
ENSMUSG00000039087	Rreb1	18	81	30	20	19	32	32.3422	-0.0569658	0.0341732	-1.32088	0.186543	0.99983
ENSMUSG00000033039	Micall1	66	143	105	75	68	113	92.5771	-0.0569438	0.0517408	-1.02532	0.305212	0.99983
ENSMUSG00000022895	Ets2	1112	1786	1820	1392	1141	1973	1497.38	-0.0569411	0.0672641	-0.850638	0.39497	0.99983
ENSMUSG00000033124	Atg9a	756	995	1131	868	682	1237	922.958	-0.0569355	0.0673695	-0.856456	0.391745	0.99983
ENSMUSG00000024851	Pitpnm1	1448	1869	2057	1545	1517	2099	1736.03	-0.0569274	0.0661923	-0.861723	0.38884	0.99983
ENSMUSG00000032017	Grik4	260	440	460	287	318	470	362.207	-0.0569071	0.066679	-0.842243	0.399652	0.99983
ENSMUSG00000021111	Papola	541	1027	977	633	594	1204	793.728	-0.0569066	0.0673416	-0.821351	0.411446	0.99983
ENSMUSG00000103793	Pcdhga6	133	229	198	129	140	235	172.472	-0.0568719	0.0604553	-0.913645	0.360903	0.99983
ENSMUSG00000018363	Smurf2	245	317	397	219	243	445	299.93	-0.0568283	0.0651903	-0.885643	0.37581	0.99983
ENSMUSG00000057133	Chd6	1197	1693	2016	1398	1127	2264	1559.26	-0.056821	0.066819	-0.859291	0.39018	0.99983
ENSMUSG00000021185	Dglucy	46	56	85	26	46	64	52.0578	-0.0568145	0.0429167	-1.38997	0.164538	0.99983
ENSMUSG00000040481	Bptf	2211	3020	3438	2432	2145	3919	2778.98	-0.0567991	0.0653616	-0.868505	0.385118	0.99983
ENSMUSG00000072704	Smim10l1	628	884	1206	713	608	1326	852.353	-0.0567823	0.0674511	-0.848871	0.395953	0.99983
ENSMUSG00000015149	Sirt2	193	456	358	231	249	432	307.548	-0.056696	0.064015	-0.798833	0.424388	0.99983
ENSMUSG00000022528	Hes1	49	71	75	39	36	77	55.8089	-0.0566669	0.0451053	-1.26734	0.205032	0.99983
ENSMUSG00000059991	Nptx2	1008	964	1380	1041	771	1466	1084.29	-0.0566017	0.0670857	-0.824906	0.409425	0.99983
ENSMUSG00000053293	Pom121	262	494	326	261	141	340	298.326	-0.0564962	0.0392159	-1.4452	0.148401	0.99983
ENSMUSG00000020599	Rgs9	220	236	303	193	197	313	239.471	-0.0564843	0.0634942	-0.870314	0.384129	0.99983
ENSMUSG00000096146	Kcnj11	358	502	600	393	340	665	459.673	-0.0564785	0.0672347	-0.84491	0.398161	0.99983
ENSMUSG00000074182	Znhit6	52	83	58	52	35	58	56.2451	-0.0564691	0.0446177	-1.24364	0.213632	0.99983
ENSMUSG00000047658	Gal3st3	388	644	520	530	297	606	489.324	-0.0564481	0.0639461	-0.947609	0.343329	0.99983
ENSMUSG00000032290	Ptpn9	323	446	507	335	341	525	403.546	-0.0564027	0.0670158	-0.840746	0.40049	0.99983
ENSMUSG00000034613	Ppm1h	1347	1817	2216	1512	1281	2474	1715.92	-0.0562799	0.0662111	-0.854435	0.392864	0.99983
ENSMUSG00000097929	Tunar	129	156	182	131	95	197	144.667	-0.0562624	0.0589902	-0.97011	0.331992	0.99983
ENSMUSG00000047246	Hist1h2be	105	99	150	110	69	126	108.472	-0.0562339	0.0554211	-1.05505	0.291401	0.99983
ENSMUSG00000031148	Gpkow	202	518	383	289	250	433	334.163	-0.0562306	0.0624729	-0.78272	0.433792	0.99983
ENSMUSG00000039795	Zfand1	111	145	244	105	127	201	148.938	-0.0562247	0.0584411	-0.950878	0.341666	0.99983
ENSMUSG00000027650	Tti1	314	351	480	283	307	485	361.354	-0.0561957	0.0658531	-0.84641	0.397324	0.99983
ENSMUSG00000011256	Adam19	157	232	295	169	156	305	209.979	-0.0561085	0.063208	-0.887942	0.374572	0.99983
ENSMUSG00000005312	Ubqln1	2304	2805	3637	2591	2109	3858	2807.15	-0.0560684	0.0647847	-0.869505	0.384571	0.99983
ENSMUSG00000039501	Znfx1	757	1122	1191	819	769	1389	977.296	-0.0560682	0.0673917	-0.828245	0.407532	0.99983
ENSMUSG00000023092	Fhl1	230	528	373	316	268	420	347.949	-0.0560597	0.0635517	-0.801717	0.422717	0.99983
ENSMUSG00000050029	Rap2c	108	205	236	112	136	245	165.127	-0.0560431	0.0608158	-0.905779	0.365053	0.99983
ENSMUSG00000032462	Pik3cb	432	722	664	488	478	751	575.747	-0.0559844	0.0675032	-0.81122	0.417239	0.99983
ENSMUSG00000038902	Pogz	539	938	858	688	522	995	735.074	-0.0559828	0.0670579	-0.831504	0.405689	0.99983
ENSMUSG00000058761	Rnf169	699	846	1168	773	669	1160	861.464	-0.0559744	0.0673977	-0.832579	0.405082	0.99983
ENSMUSG00000051111	Sv2c	674	613	849	615	523	934	690.989	-0.0559728	0.0674981	-0.771627	0.440335	0.99983
ENSMUSG00000028525	Pde4b	982	1307	1879	1131	1043	1802	1309.8	-0.0559675	0.066927	-0.831947	0.405439	0.99983
ENSMUSG00000001054	Rmnd5b	634	938	995	686	641	1155	816.341	-0.0559537	0.0675399	-0.824481	0.409666	0.99983
ENSMUSG00000055489	Ano5	31	54	61	16	26	61	38.977	-0.0558458	0.0389062	-1.54987	0.121173	0.99983
ENSMUSG00000032997	Chpf	988	1155	1444	1079	911	1474	1155.17	-0.0558093	0.0668715	-0.83692	0.402637	0.99983
ENSMUSG00000049536	Tceal1	193	312	411	263	189	381	279.428	-0.0558016	0.0638508	-0.884235	0.376569	0.99983
ENSMUSG00000074994	Qser1	83	170	179	103	83	189	127.587	-0.0557902	0.0557215	-0.972065	0.331018	0.99983
ENSMUSG00000020176	Grb10	360	563	584	403	358	676	474.634	-0.0557462	0.0670733	-0.826215	0.408682	0.99983
ENSMUSG00000079157	Fam155a	958	1202	1776	1131	913	1743	1241.1	-0.0557253	0.0669142	-0.837342	0.402401	0.99983
ENSMUSG00000042524	Sun2	253	310	431	273	233	426	311.094	-0.0557081	0.0659855	-0.848138	0.396361	0.99983
ENSMUSG00000035891	Cerk	574	746	805	542	567	948	680.848	-0.0555422	0.0675609	-0.813097	0.416163	0.99983
ENSMUSG00000064293	Cntn4	623	830	1177	706	613	1222	826.322	-0.0555366	0.0673939	-0.825207	0.409254	0.99983
ENSMUSG00000008604	Ubqln4	1016	1204	1412	1099	907	1527	1174.29	-0.0555112	0.0667682	-0.829301	0.406934	0.99983
ENSMUSG00000035569	Ankrd11	2046	3629	3358	2538	2297	3785	2864.72	-0.0554852	0.0667841	-0.813804	0.415757	0.99983
ENSMUSG00000028675	Pnrc2	184	314	411	204	244	380	277.435	-0.0554659	0.0650978	-0.831567	0.405653	0.99983
ENSMUSG00000001300	Efnb2	387	685	603	481	434	642	528.911	-0.0554451	0.067232	-0.811194	0.417254	0.99983
ENSMUSG00000001847	Rac1	662	1567	1212	766	664	1361	996.22	-0.055439	0.0496721	-1.03707	0.299703	0.99983
ENSMUSG00000039234	Sec24d	240	342	458	286	234	451	322.455	-0.0554098	0.0659466	-0.845244	0.397975	0.99983
ENSMUSG00000042203	Tbc1d22b	289	459	491	329	329	497	389.138	-0.0554089	0.0668921	-0.822732	0.41066	0.99983
ENSMUSG00000084786	Ubl5	486	495	748	658	331	642	552.442	-0.0554002	0.0667562	-0.990844	0.321762	0.99983
ENSMUSG00000028039	Efna3	367	433	627	394	331	638	449.362	-0.0553872	0.0672867	-0.825188	0.409265	0.99983
ENSMUSG00000021720	Rnf180	132	184	209	114	140	220	161.849	-0.0553783	0.0601097	-0.932802	0.350922	0.99983
ENSMUSG00000016477	E2f3	209	311	387	225	192	446	280.634	-0.0553771	0.0647531	-0.873689	0.382288	0.99983
ENSMUSG00000060798	Intu	95	148	160	112	76	164	121.637	-0.0553382	0.0558208	-1.01907	0.308168	0.99983
ENSMUSG00000036323	Srp72	920	1316	1650	1101	905	1758	1228.88	-0.0553062	0.067016	-0.831513	0.405684	0.99983
ENSMUSG00000035781	R3hdm4	853	1268	1140	1009	816	1296	1050.3	-0.0552862	0.0674703	-0.820197	0.412104	0.99983
ENSMUSG00000051978	Erich1	116	86	145	72	88	133	105.589	-0.0552709	0.0512534	-1.00594	0.314443	0.99983
ENSMUSG00000039354	Smarcal1	740	1147	1200	848	744	1394	979.78	-0.0552651	0.0675045	-0.815366	0.414863	0.99983
ENSMUSG00000019856	Fam184a	188	253	357	194	196	347	246.071	-0.0552519	0.0644495	-0.854684	0.392726	0.99983
ENSMUSG00000060733	Ipmk	269	512	598	278	356	680	424.219	-0.0551506	0.0669978	-0.832324	0.405226	0.99983
ENSMUSG00000041654	Slc39a11	177	294	324	210	188	331	245.464	-0.0551239	0.0641161	-0.849352	0.395686	0.99983
ENSMUSG00000038502	Ptov1	670	1178	969	834	699	1118	895.084	-0.0550838	0.0675366	-0.797473	0.425176	0.99983
ENSMUSG00000016308	Ube2a	166	359	351	245	158	381	263.464	-0.0550505	0.0598903	-0.904077	0.365954	0.99983
ENSMUSG00000073563	Csnk1g3	677	1132	1176	844	694	1317	940.4	-0.0550366	0.067592	-0.810026	0.417925	0.99983
ENSMUSG00000026610	Esrrg	114	197	232	125	113	257	163.911	-0.05501	0.0599202	-0.919295	0.357941	0.99983
ENSMUSG00000032199	Polr2m	564	872	1000	656	584	1105	767.777	-0.0550046	0.0675688	-0.811841	0.416883	0.99983
ENSMUSG00000061353	Cxcl12	29	94	77	32	30	86	53.8171	-0.055001	0.0419457	-1.22357	0.221116	0.99983
ENSMUSG00000033389	Arhgap44	1690	2363	2661	2004	1649	2864	2151.45	-0.0549768	0.0659148	-0.843144	0.399148	0.99983
ENSMUSG00000041935	AW549877	261	529	534	356	293	570	406.189	-0.0549714	0.0652941	-0.801459	0.422866	0.99983
ENSMUSG00000035356	Nfkbiz	40	54	54	18	38	46	41.114	-0.0549697	0.0391992	-1.48924	0.136425	0.99983
ENSMUSG00000006418	Rnf114	205	272	368	225	208	345	262.436	-0.0549371	0.0648407	-0.848482	0.39617	0.99983
ENSMUSG00000053460	Ggcx	163	239	266	166	148	309	206.938	-0.054921	0.0624303	-0.887228	0.374956	0.99983
ENSMUSG00000031392	Irak1	96	217	201	123	114	211	153.518	-0.0549072	0.0581899	-0.872863	0.382738	0.99983
ENSMUSG00000019979	Apaf1	348	524	687	381	410	677	485.53	-0.0548828	0.0673877	-0.808406	0.418857	0.99983
ENSMUSG00000018678	Sp2	53	83	56	62	24	54	55.4377	-0.0548321	0.0420731	-1.41392	0.157386	0.99983
ENSMUSG00000028843	Sh3bgrl3	229	323	341	307	183	329	281.186	-0.0548247	0.0636678	-0.957775	0.338176	0.99983
ENSMUSG00000070056	Mfhas1	437	674	731	501	443	820	581.391	-0.054817	0.0675039	-0.809399	0.418285	0.99983
ENSMUSG00000021007	Spata7	189	231	367	186	175	379	242.052	-0.0547955	0.0643116	-0.858567	0.390579	0.99983
ENSMUSG00000022816	Fstl1	526	691	814	554	493	924	647.091	-0.0547928	0.0675918	-0.810947	0.417396	0.99983
ENSMUSG00000050017	Pitpnb	125	338	216	210	140	208	202.854	-0.0547613	0.0560377	-0.922523	0.356256	0.99983
ENSMUSG00000015354	Pcolce2	29	31	29	16	11	23	23.2069	-0.0547256	0.0321811	-1.70694	0.0878341	0.99983
ENSMUSG00000048249	Crebrf	507	707	942	588	532	932	677.406	-0.05471	0.067584	-0.808618	0.418735	0.99983
ENSMUSG00000075707	Dio3	29	63	51	26	26	46	38.8239	-0.0546553	0.0394743	-1.33567	0.181657	0.99983
ENSMUSG00000026259	Ngef	1695	2337	2409	1929	1622	2720	2078.95	-0.0546379	0.0660084	-0.827893	0.407731	0.99983
ENSMUSG00000022757	Tfg	365	1049	831	476	588	988	682.643	-0.0546318	0.0668238	-0.675121	0.499599	0.99983
ENSMUSG00000034220	Gpc1	1043	1504	1756	1128	1161	1868	1369.79	-0.0545468	0.0664365	-0.821184	0.411541	0.99983
ENSMUSG00000015095	Fbxw5	529	733	815	569	533	896	662.27	-0.0545452	0.0675827	-0.804548	0.42108	0.99983
ENSMUSG00000008859	Rala	508	854	917	593	563	1025	715.998	-0.0545397	0.0675921	-0.794687	0.426796	0.99983
ENSMUSG00000033214	Slitrk5	1191	2101	2149	1510	1363	2309	1714.87	-0.0545054	0.0671104	-0.796475	0.425756	0.99983
ENSMUSG00000030616	Sytl2	329	448	550	362	349	534	418.625	-0.0544948	0.0670623	-0.816555	0.414183	0.99983
ENSMUSG00000048070	Pirt	26	37	41	12	23	25	26.9532	-0.0544832	0.0339728	-1.68733	0.0915403	0.99983
ENSMUSG00000015396	Cd83	136	197	260	116	162	260	180.962	-0.0544267	0.0609897	-0.929104	0.352835	0.99983
ENSMUSG00000024042	Sik1	73	145	205	88	83	200	123.161	-0.0544031	0.0565439	-0.917708	0.358772	0.99983
ENSMUSG00000074743	Thbd	163	257	251	189	159	263	209.098	-0.0543482	0.0627329	-0.864175	0.387492	0.99983
ENSMUSG00000041199	Rpusd1	201	345	312	241	207	339	268.099	-0.0543396	0.0643001	-0.829784	0.406661	0.99983
ENSMUSG00000036432	Siah2	111	143	213	111	106	200	141.365	-0.0543168	0.059049	-0.917185	0.359046	0.99983
ENSMUSG00000001173	Ocrl	595	1025	1110	724	644	1251	855.685	-0.0543133	0.0675922	-0.790358	0.429319	0.99983
ENSMUSG00000038400	Pmepa1	93	178	138	116	91	141	124.231	-0.0543007	0.0557441	-0.948567	0.342841	0.99983
ENSMUSG00000035864	Syt1	11447	20733	20219	14951	11582	24092	16511.6	-0.0542905	0.0674916	-0.795747	0.426179	0.99983
ENSMUSG00000023192	Grm2	767	871	989	839	551	1211	852.044	-0.0542882	0.0675894	-0.819045	0.412761	0.99983
ENSMUSG00000049422	Chchd10	284	571	525	422	263	573	423.796	-0.0542332	0.0628945	-0.876882	0.380551	0.99983
ENSMUSG00000036686	Cc2d1a	479	741	674	584	462	746	605.079	-0.054192	0.0674022	-0.810821	0.417469	0.99983
ENSMUSG00000000792	Slc5a5	66	71	97	51	55	83	69.2799	-0.0541764	0.04844	-1.11366	0.265427	0.99983
ENSMUSG00000020956	Dtd2	71	107	183	88	80	124	104.277	-0.0541639	0.0530313	-0.980492	0.326843	0.99983
ENSMUSG00000027007	Itprid2	58	135	106	54	79	115	88.0767	-0.0541629	0.0521916	-0.990632	0.321865	0.99983
ENSMUSG00000027293	Ehd4	65	127	88	61	49	121	82.0108	-0.0541215	0.0476646	-1.09455	0.273714	0.99983
ENSMUSG00000025369	Smarcc2	1944	2504	2950	2317	1803	3075	2383.7	-0.0540992	0.065576	-0.843617	0.398883	0.99983
ENSMUSG00000044792	Isca1	342	746	690	471	410	759	546.969	-0.0540835	0.0661273	-0.75439	0.450615	0.99983
ENSMUSG00000039156	Stim2	1662	2409	2967	1814	1789	3287	2233.84	-0.0540578	0.0654124	-0.828219	0.407547	0.99983
ENSMUSG00000003992	Ssbp2	423	576	622	476	383	698	517.233	-0.0540031	0.0673914	-0.80711	0.419603	0.99983
ENSMUSG00000047412	Zbtb44	575	1005	1170	687	690	1251	858.046	-0.0539568	0.0674776	-0.778823	0.436084	0.99983
ENSMUSG00000021975	Ints9	71	136	106	83	64	113	93.4164	-0.0538197	0.0517488	-1.00331	0.315711	0.99983
ENSMUSG00000090673	Gm340	147	184	215	157	113	233	170.258	-0.053781	0.0608099	-0.90546	0.365222	0.99983
ENSMUSG00000022174	Dad1	226	244	308	257	147	335	247.448	-0.0537499	0.0639256	-0.903685	0.366162	0.99983
ENSMUSG00000022861	Dgkg	3451	5132	5513	3935	3635	6185	4515.99	-0.0536888	0.0645495	-0.829305	0.406932	0.99983
ENSMUSG00000059248	Sept9	1412	1873	2194	1612	1363	2364	1759.24	-0.0536428	0.065936	-0.818526	0.413057	0.99983
ENSMUSG00000028360	Slc44a5	332	719	768	396	531	759	560.607	-0.0536361	0.0675278	-0.747139	0.45498	0.99983
ENSMUSG00000074923	Pak6	531	734	822	615	498	897	665.635	-0.0536332	0.067592	-0.802559	0.42223	0.99983
ENSMUSG00000038384	Setd1b	182	380	252	262	142	307	248.872	-0.0536119	0.0571099	-0.938463	0.348006	0.99983
ENSMUSG00000075703	Selenoi	902	1026	1368	988	893	1248	1058.04	-0.0536059	0.0675229	-0.805571	0.42049	0.99983
ENSMUSG00000058444	Map2k5	206	334	323	228	223	348	270.67	-0.0535715	0.0650394	-0.809684	0.418122	0.99983
ENSMUSG00000029478	Ncor2	833	1381	1009	1137	741	1131	1036.97	-0.0535612	0.067091	-0.8472	0.396884	0.99983
ENSMUSG00000024251	Thada	270	273	390	237	229	420	295.225	-0.0535472	0.0648309	-0.803571	0.421645	0.99983
ENSMUSG00000031310	Zmym3	1341	1674	2205	1475	1270	2368	1668.55	-0.0534915	0.0659504	-0.812275	0.416634	0.99983
ENSMUSG00000015711	Prune1	279	489	469	344	304	504	387.502	-0.0534171	0.0663239	-0.789664	0.429724	0.99983
ENSMUSG00000004085	Map3k20	126	183	208	118	124	231	159.046	-0.0534123	0.060123	-0.894125	0.371255	0.99983
ENSMUSG00000058589	Anks1b	3361	5099	5808	4232	3322	6321	4538.72	-0.0534014	0.0661597	-0.817719	0.413518	0.99983
ENSMUSG00000024044	Epb41l3	2360	3330	3336	2596	2290	3960	2913.84	-0.0533979	0.0659086	-0.80163	0.422767	0.99983
ENSMUSG00000032652	Crebl2	203	264	367	216	219	327	258.973	-0.0533476	0.0643291	-0.83101	0.405968	0.99983
ENSMUSG00000035964	Tmem59l	2757	3905	4318	3167	2621	5023	3522.33	-0.0533452	0.0657769	-0.814537	0.415337	0.99983
ENSMUSG00000027864	Ptgfrn	289	320	364	290	221	422	312.331	-0.0533225	0.0656899	-0.800706	0.423302	0.99983
ENSMUSG00000038518	Jarid2	390	651	703	451	441	767	547.445	-0.0533094	0.067493	-0.777161	0.437064	0.99983
ENSMUSG00000022257	Laptm4b	398	498	706	468	350	721	504.631	-0.0533092	0.0674234	-0.808687	0.418695	0.99983
ENSMUSG00000050534	Htr5b	160	174	242	157	139	229	179.841	-0.0532887	0.0615222	-0.861755	0.388823	0.99983
ENSMUSG00000026853	Crat	169	334	318	194	194	371	252.142	-0.0532313	0.0635316	-0.802595	0.422209	0.99983
ENSMUSG00000006241	Ccdc159	31	61	67	27	31	58	43.6329	-0.0531974	0.0417257	-1.25945	0.207867	0.99983
ENSMUSG00000016942	Tmprss6	21	21	27	6	8	16	16.2304	-0.0531813	0.0273452	-2.02366	0.0430048	0.99983
ENSMUSG00000021248	Tmed10	465	754	761	571	454	866	625.32	-0.0531809	0.0672994	-0.791266	0.428789	0.99983
ENSMUSG00000041078	Grid1	1106	1509	1714	1193	1103	1935	1387.68	-0.0531739	0.0665728	-0.796638	0.425662	0.99983
ENSMUSG00000021928	Ebpl	101	149	175	114	85	180	129.149	-0.0531497	0.0573132	-0.945717	0.344293	0.99983
ENSMUSG00000040964	Arhgef10l	402	470	596	381	411	599	468.117	-0.0531492	0.0669341	-0.789984	0.429537	0.99983
ENSMUSG00000034610	Tut4	351	549	639	370	366	755	482.09	-0.0531456	0.067166	-0.800247	0.423568	0.99983
ENSMUSG00000041215	Yeats2	162	252	252	174	160	280	207.527	-0.0531139	0.0627756	-0.83569	0.40333	0.99983
ENSMUSG00000062044	Lmtk3	1595	2407	1952	1941	1467	2306	1931.06	-0.053111	0.0673696	-0.789321	0.429925	0.99983
ENSMUSG00000029436	Mmp17	2421	3278	3866	2616	2619	4056	3069.48	-0.0531095	0.0648508	-0.819483	0.412511	0.99983
ENSMUSG00000034648	Lrrn1	1042	1732	1952	1382	1062	2087	1485.85	-0.0531091	0.0675448	-0.790728	0.429102	0.99983
ENSMUSG00000012609	Ttll5	175	275	330	193	215	300	241.321	-0.0530985	0.0640857	-0.826895	0.408297	0.99983
ENSMUSG00000027678	Ncoa3	510	767	765	571	532	851	651.89	-0.0530748	0.067592	-0.778516	0.436265	0.99983
ENSMUSG00000029790	Cep41	49	98	85	53	46	86	67.1776	-0.0530587	0.0475029	-1.0776	0.281214	0.99983
ENSMUSG00000054027	Nt5dc3	1871	2696	3189	2190	1892	3495	2472.15	-0.0530481	0.0655874	-0.811385	0.417145	0.99983
ENSMUSG00000053070	Cfap300	62	109	114	53	80	103	84.448	-0.0530429	0.0518045	-1.04361	0.296666	0.99983
ENSMUSG00000051934	Spats2	309	472	509	358	288	587	405.816	-0.0530114	0.066423	-0.803975	0.421411	0.99983
ENSMUSG00000042035	Igsf3	462	522	789	439	438	838	559.42	-0.0530028	0.0674023	-0.784061	0.433004	0.99983
ENSMUSG00000038305	Spats2l	160	253	247	156	172	281	205.687	-0.0530022	0.0627178	-0.834972	0.403734	0.99983
ENSMUSG00000022964	Tmem50b	446	716	722	558	460	763	596.599	-0.0530004	0.0674325	-0.791416	0.428701	0.99983
ENSMUSG00000059842	Zfp341	79	95	75	61	55	93	76.2306	-0.0529383	0.0491005	-1.00081	0.316919	0.99983
ENSMUSG00000027236	Eif3j1	288	397	493	330	284	498	370.478	-0.052937	0.0667127	-0.79952	0.423989	0.99983
ENSMUSG00000021285	Ppp1r13b	915	1424	1423	1075	928	1634	1200.66	-0.0529121	0.067324	-0.781729	0.434374	0.99983
ENSMUSG00000034570	Inpp5j	346	517	472	393	321	553	425.8	-0.0528567	0.0666445	-0.78426	0.432888	0.99983
ENSMUSG00000020180	Snrpd3	305	368	478	380	234	480	365.028	-0.0528295	0.0661559	-0.865353	0.386845	0.99983
ENSMUSG00000021758	Ddx4	66	62	79	47	61	45	61.4978	-0.0527964	0.0441015	-1.30433	0.19212	0.99983
ENSMUSG00000002957	Ap2a2	4546	6779	7805	4981	5198	8485	6105.89	-0.0527785	0.0635306	-0.831675	0.405593	0.99983
ENSMUSG00000043391	2510009E07Rik	390	612	642	473	343	767	517.706	-0.0527761	0.0664597	-0.812357	0.416587	0.99983
ENSMUSG00000026663	Atf6	1320	1657	2142	1469	1242	2305	1638.78	-0.052776	0.0659957	-0.802362	0.422344	0.99983
ENSMUSG00000040479	Dgkz	6387	8340	9424	7006	6533	10036	7813.79	-0.0527725	0.0632899	-0.832477	0.40514	0.99983
ENSMUSG00000034021	Pds5b	2348	3337	4002	2646	2454	4382	3091	-0.0527496	0.0647138	-0.815203	0.414956	0.99983
ENSMUSG00000027624	Epb41l1	3874	5773	5848	4561	3940	6589	4984.75	-0.0527447	0.0650693	-0.810477	0.417666	0.99983
ENSMUSG00000050321	Neto1	454	857	825	614	488	900	666.777	-0.0527114	0.0669095	-0.770056	0.441267	0.99983
ENSMUSG00000049739	Zfp646	422	500	649	421	393	702	500.33	-0.0526983	0.067395	-0.776754	0.437304	0.99983
ENSMUSG00000024535	Snx24	80	103	123	71	62	135	92.2185	-0.0526485	0.0528329	-1.01092	0.312057	0.99983
ENSMUSG00000028911	Srsf4	90	143	137	93	100	125	113.365	-0.052646	0.0562501	-0.937726	0.348385	0.99983
ENSMUSG00000049630	C1ql3	425	898	1134	630	539	1105	744.495	-0.0525757	0.0668624	-0.697992	0.485182	0.99983
ENSMUSG00000044647	Csrnp3	1846	2356	3097	1941	1823	3434	2331.52	-0.0525462	0.0654742	-0.803326	0.421786	0.99983
ENSMUSG00000019970	Sgk1	471	711	882	481	514	1019	648.306	-0.0525361	0.0675864	-0.79267	0.42797	0.99983
ENSMUSG00000067377	Tspan6	113	143	163	95	98	187	129.103	-0.0525337	0.0571212	-0.92282	0.356101	0.99983
ENSMUSG00000000976	Heatr6	137	221	205	149	129	235	174.589	-0.0525217	0.0605693	-0.851245	0.394633	0.99983
ENSMUSG00000001763	Tspan33	103	211	168	138	114	162	146.944	-0.0524937	0.0576685	-0.885805	0.375722	0.99983
ENSMUSG00000019790	Stxbp5	2197	3545	3865	2519	2410	4470	3050.06	-0.0524767	0.065771	-0.793019	0.427766	0.99983
ENSMUSG00000055900	Tmem69	38	59	77	32	28	75	48.5118	-0.0524621	0.0429966	-1.26079	0.207385	0.99983
ENSMUSG00000027254	Map1a	18781	24439	25386	19353	18457	29857	22310.1	-0.0524275	0.0640069	-0.802815	0.422082	0.99983
ENSMUSG00000037692	Ahdc1	689	1971	1250	830	1122	1619	1206.15	-0.0524222	0.0674404	-0.646758	0.517789	0.99983
ENSMUSG00000039410	Prdm16	53	111	116	59	66	105	81.5858	-0.0524211	0.0512597	-0.975986	0.329071	0.99983
ENSMUSG00000073471	Rsph3a	38	62	68	34	23	71	46.7284	-0.0523809	0.0414322	-1.32364	0.185622	0.99983
ENSMUSG00000034009	Rxfp1	284	365	539	339	247	548	370.565	-0.0523662	0.0665468	-0.807274	0.419509	0.99983
ENSMUSG00000026112	Coa5	258	359	396	297	228	435	320.117	-0.0523514	0.0657287	-0.810533	0.417634	0.99983
ENSMUSG00000042675	Ypel3	359	598	615	471	364	640	494.047	-0.0522756	0.066766	-0.79321	0.427655	0.99983
ENSMUSG00000027130	Slc12a6	519	635	879	566	492	904	644.782	-0.0522572	0.067587	-0.774363	0.438716	0.99983
ENSMUSG00000108348	Gm42372	1766	2212	2804	1852	1753	3047	2176.11	-0.0522333	0.0656326	-0.792677	0.427966	0.99983
ENSMUSG00000029203	Ube2k	881	1487	1584	1089	916	1819	1246.06	-0.0521745	0.0675349	-0.765673	0.443871	0.99983
ENSMUSG00000026510	Trp53bp2	137	209	218	143	141	230	175.044	-0.0521726	0.0614654	-0.840583	0.400582	0.99983
ENSMUSG00000028833	Ncdn	31430	38668	47585	36027	28636	51510	38065.1	-0.0521592	0.06247	-0.840241	0.400773	0.99983
ENSMUSG00000031765	Mt1	82	62	107	71	40	106	76.1855	-0.0521577	0.0502888	-1.0425	0.297179	0.99983
ENSMUSG00000029228	Lnx1	60	82	87	53	48	88	67.9558	-0.0521397	0.0485364	-1.07104	0.28415	0.99983
ENSMUSG00000040270	Bach2	67	111	153	68	69	151	97.2246	-0.0521331	0.0540152	-0.963173	0.335461	0.99983
ENSMUSG00000054469	Lclat1	403	644	716	548	356	770	552.671	-0.052129	0.0663127	-0.828711	0.407268	0.99983
ENSMUSG00000040524	Zfp609	283	541	392	365	255	498	380.154	-0.0521202	0.0630064	-0.792277	0.428199	0.99983
ENSMUSG00000043336	Filip1l	19	57	42	23	16	31	30.124	-0.0521128	0.0344568	-1.42844	0.153164	0.99983
ENSMUSG00000026888	Grb14	156	311	315	208	167	337	238.434	-0.0521018	0.062119	-0.806228	0.420111	0.99983
ENSMUSG00000024304	Cdh2	717	1282	1192	956	694	1388	1005.13	-0.0519824	0.0671412	-0.775796	0.437869	0.99983
ENSMUSG00000029603	Dtx1	787	1057	1102	909	706	1250	950.181	-0.051978	0.0674398	-0.779126	0.435906	0.99983
ENSMUSG00000028469	Npr2	196	278	308	213	206	303	245.96	-0.0519235	0.064543	-0.807804	0.419203	0.99983
ENSMUSG00000035953	Pip4p1	240	348	379	285	253	355	305.524	-0.0519004	0.0656424	-0.811389	0.417143	0.99983
ENSMUSG00000059824	Dbp	235	405	348	310	246	345	311.707	-0.0518839	0.064853	-0.821684	0.411257	0.99983
ENSMUSG00000062257	Opcml	5122	7583	9451	6294	4673	11095	7027.52	-0.0518674	0.0666545	-0.798481	0.424591	0.99983
ENSMUSG00000040351	Ankib1	846	1372	1609	903	1015	1810	1206.45	-0.0518666	0.0668449	-0.781161	0.434708	0.99983
ENSMUSG00000035024	Ncapd3	258	350	471	274	274	468	337.185	-0.0518057	0.066322	-0.779586	0.435635	0.99983
ENSMUSG00000002205	Vrk3	145	195	253	145	150	247	183.327	-0.0517793	0.0619018	-0.836839	0.402683	0.99983
ENSMUSG00000022075	Rhobtb2	882	1228	1274	850	930	1529	1087.63	-0.0517244	0.0674414	-0.764152	0.444777	0.99983
ENSMUSG00000039860	Srrm3	354	466	517	389	356	520	427.692	-0.0517019	0.0671761	-0.776715	0.437327	0.99983
ENSMUSG00000038375	Trp53inp2	608	1033	951	745	603	1136	821.444	-0.0516879	0.0674187	-0.756233	0.44951	0.99983
ENSMUSG00000049892	Rasd1	406	741	594	552	387	678	549.255	-0.0516435	0.0657028	-0.789882	0.429597	0.99983
ENSMUSG00000048905	4930539E08Rik	90	125	104	76	87	112	98.7943	-0.0515897	0.053884	-0.924055	0.355457	0.99983
ENSMUSG00000006731	B4galnt1	436	628	667	584	378	677	551.488	-0.0515642	0.0668751	-0.840003	0.400907	0.99983
ENSMUSG00000005357	Slc1a6	118	151	197	133	114	162	143.487	-0.0515391	0.0586145	-0.907075	0.364367	0.99983
ENSMUSG00000015143	Actn1	566	782	719	607	512	882	667.234	-0.0514984	0.0675182	-0.74292	0.45753	0.99983
ENSMUSG00000053835	H2-T24	30	21	52	22	6	38	26.7161	-0.0514881	0.0338494	-1.70046	0.0890447	0.99983
ENSMUSG00000017417	Plxdc1	171	338	202	225	182	218	223.73	-0.0514211	0.06161	-0.801227	0.423	0.99983
ENSMUSG00000021699	Pde4d	703	931	1013	847	555	1194	850.884	-0.051416	0.0675349	-0.799267	0.424135	0.99983
ENSMUSG00000035941	Ibtk	329	548	546	337	383	640	448.589	-0.051396	0.0670817	-0.762022	0.446047	0.99983
ENSMUSG00000039929	Urb1	217	256	332	221	183	361	253.911	-0.0513927	0.0646873	-0.798306	0.424693	0.99983
ENSMUSG00000021451	Sema4d	197	454	354	248	242	427	308.84	-0.0513839	0.0636293	-0.720776	0.471047	0.99983
ENSMUSG00000041842	Fhdc1	69	64	92	48	47	93	67.1566	-0.0513365	0.047594	-1.05797	0.290068	0.99983
ENSMUSG00000022637	Cblb	224	426	384	294	238	420	321.423	-0.051323	0.0644385	-0.773016	0.439513	0.99983
ENSMUSG00000027177	Hipk3	1273	1715	2217	1359	1250	2552	1656.85	-0.0513213	0.0663505	-0.780629	0.435021	0.99983
ENSMUSG00000025899	Alkbh8	580	890	984	693	570	1114	777.423	-0.0512775	0.0675918	-0.762157	0.445966	0.99983
ENSMUSG00000033419	Snap91	3790	5595	6239	4675	3557	7128	4996.09	-0.0512684	0.0663647	-0.786537	0.431553	0.99983
ENSMUSG00000051444	Bbs12	66	120	157	74	79	140	100.84	-0.0512501	0.0544339	-0.906387	0.364731	0.99983
ENSMUSG00000006169	Clint1	512	746	883	593	542	918	678.394	-0.0512361	0.0675756	-0.758617	0.448081	0.99983
ENSMUSG00000055817	Mta3	751	1165	1298	798	901	1403	1020.99	-0.0512056	0.0670823	-0.765374	0.444049	0.99983
ENSMUSG00000034111	Tmed8	694	1195	1216	811	790	1391	981.159	-0.0512027	0.0674588	-0.743809	0.456992	0.99983
ENSMUSG00000022305	Lrp12	809	1228	1565	948	906	1622	1134.07	-0.0511724	0.0669293	-0.757666	0.448651	0.99983
ENSMUSG00000014599	Csf1	59	91	89	48	61	88	71.0992	-0.0511528	0.0491947	-1.03948	0.298582	0.99983
ENSMUSG00000049327	Kmt5a	150	211	244	146	134	289	187.706	-0.0511085	0.0614456	-0.84666	0.397184	0.99983
ENSMUSG00000039474	Wfs1	3164	3655	3640	3763	2302	4313	3450.97	-0.051071	0.0667039	-0.798692	0.424469	0.99983
ENSMUSG00000026469	Xpr1	810	1166	1275	922	753	1517	1038.48	-0.0510601	0.0675073	-0.761935	0.446099	0.99983
ENSMUSG00000037872	Ackr1	113	166	148	122	94	166	132.727	-0.0510375	0.057443	-0.879896	0.378916	0.99983
ENSMUSG00000029765	Plxna4	4854	6445	7422	5326	5130	7801	6043.18	-0.050998	0.0637193	-0.800611	0.423357	0.99983
ENSMUSG00000049764	Zfp280b	168	268	306	215	161	306	229.536	-0.0509593	0.0629519	-0.823948	0.409969	0.99983
ENSMUSG00000040010	Slc7a5	147	280	242	169	161	281	206.738	-0.0509467	0.0618986	-0.782304	0.434036	0.99983
ENSMUSG00000041354	Rgl2	68	102	126	67	67	119	88.1489	-0.0509463	0.0527202	-0.963701	0.335196	0.99983
ENSMUSG00000031393	Mecp2	2114	2871	3248	2481	1846	3839	2648.46	-0.0509368	0.0666804	-0.779429	0.435727	0.99983
ENSMUSG00000042359	Osbpl6	1140	1716	1805	1499	1019	1995	1488.83	-0.0509116	0.0675833	-0.792712	0.427946	0.99983
ENSMUSG00000041438	Utp4	318	478	682	370	353	682	457.823	-0.0508854	0.0672797	-0.742309	0.4579	0.99983
ENSMUSG00000038346	Zfp384	120	222	193	168	95	208	163.034	-0.0508594	0.0562024	-0.94974	0.342244	0.99983
ENSMUSG00000029471	Camkk2	2586	3320	3870	3014	2367	4235	3159.57	-0.0508337	0.0649996	-0.79239	0.428133	0.99983
ENSMUSG00000002028	Kmt2a	975	1612	1558	1241	936	1825	1317.39	-0.0508246	0.0675872	-0.757337	0.448848	0.99983
ENSMUSG00000034584	Exph5	78	100	130	60	81	123	92.5294	-0.050817	0.0524474	-0.993313	0.320558	0.99983
ENSMUSG00000024758	Rtn3	8476	12336	12940	10237	7879	15136	10861.8	-0.0508023	0.0659525	-0.78029	0.43522	0.99983
ENSMUSG00000046879	Irgm1	33	58	57	22	34	52	41.2398	-0.0507797	0.0406496	-1.272	0.203372	0.99983
ENSMUSG00000021262	Evl	347	510	481	397	327	550	427.688	-0.0507723	0.0668403	-0.755523	0.449935	0.99983
ENSMUSG00000027489	Necab3	202	290	324	209	208	349	256.319	-0.0507664	0.0648023	-0.780279	0.435227	0.99983
ENSMUSG00000007817	Zmiz1	629	1344	866	711	414	936	797.653	-0.0507462	0.0404269	-1.22301	0.221327	0.99983
ENSMUSG00000033256	Shf	285	425	395	326	273	444	352.228	-0.0507178	0.0661816	-0.761008	0.446652	0.99983
ENSMUSG00000051391	Ywhag	7912	13214	12149	10233	8527	13137	10670.2	-0.0507138	0.0661117	-0.774205	0.438809	0.99983
ENSMUSG00000044676	Zfp612	360	508	530	407	306	641	444.964	-0.0506814	0.066532	-0.773313	0.439337	0.99983
ENSMUSG00000021796	Bmpr1a	405	625	833	463	457	869	580.994	-0.0506305	0.0675801	-0.740036	0.459278	0.99983
ENSMUSG00000024990	Rbp4	12	30	25	5	12	10	15.3182	-0.0506256	0.0270013	-1.97891	0.0478261	0.99983
ENSMUSG00000028514	Usp24	1086	1366	1607	1031	1085	1885	1305.96	-0.0506141	0.0672957	-0.750202	0.453133	0.99983
ENSMUSG00000039989	Cbx4	336	456	605	428	307	589	439.201	-0.0505997	0.0668477	-0.788613	0.430338	0.99983
ENSMUSG00000036862	Dchs1	151	270	283	163	173	318	216.961	-0.050574	0.0631372	-0.785657	0.432068	0.99983
ENSMUSG00000050222	Il17d	83	83	107	81	60	90	83.8392	-0.0505394	0.0517795	-0.99751	0.318517	0.99983
ENSMUSG00000062661	Ncs1	2562	4093	4490	3071	2934	4779	3547.68	-0.0505222	0.0649416	-0.77279	0.439647	0.99983
ENSMUSG00000021065	Fut8	673	957	1158	770	647	1315	885.243	-0.0505199	0.067477	-0.755489	0.449956	0.99983
ENSMUSG00000027955	Fam198b	46	57	81	36	38	71	52.8021	-0.0504844	0.0446684	-1.13761	0.255284	0.99983
ENSMUSG00000038855	Itpkb	122	246	215	165	127	225	178.049	-0.0504643	0.0591904	-0.824586	0.409606	0.99983
ENSMUSG00000026442	Nfasc	3180	5431	5232	3937	3418	6052	4408.14	-0.0504627	0.0666264	-0.746253	0.455514	0.99983
ENSMUSG00000042650	Alkbh5	683	924	1185	791	669	1253	886.898	-0.0504578	0.067327	-0.754797	0.450371	0.99983
ENSMUSG00000020891	Alox8	20	27	42	11	14	25	22.1372	-0.0504325	0.0317881	-1.61569	0.106162	0.99983
ENSMUSG00000038550	Ciart	74	107	146	63	81	140	97.4049	-0.0504252	0.0537857	-0.956683	0.338727	0.99983
ENSMUSG00000030779	Rbbp6	704	1132	1303	870	818	1301	991.014	-0.0503991	0.0673567	-0.742466	0.457805	0.99983
ENSMUSG00000041708	Mpped1	2812	3902	4347	3273	2817	4729	3563.19	-0.0503637	0.0646732	-0.782882	0.433696	0.99983
ENSMUSG00000028796	Phc2	458	789	698	566	489	785	617.782	-0.0503604	0.0673735	-0.733413	0.463307	0.99983
ENSMUSG00000032481	Smarcc1	645	1343	1073	849	721	1305	958.696	-0.0503169	0.0669719	-0.696428	0.486161	0.99983
ENSMUSG00000025047	Pdcd11	358	456	576	343	381	605	440.863	-0.0502987	0.0669665	-0.755009	0.450244	0.99983
ENSMUSG00000022438	Parvb	35	96	82	46	46	70	60.1413	-0.0502957	0.0454857	-0.999741	0.317436	0.99983
ENSMUSG00000031021	Tmem9b	569	889	1119	682	591	1233	808.448	-0.0502837	0.0675658	-0.741949	0.458118	0.99983
ENSMUSG00000039741	Bahcc1	147	245	205	174	153	211	187.46	-0.0502835	0.0617033	-0.807185	0.41956	0.99983
ENSMUSG00000018750	Zbtb4	1077	1436	1920	1306	1089	1875	1408.14	-0.0502708	0.0668109	-0.761867	0.446139	0.99983
ENSMUSG00000013858	Tmem259	581	832	969	630	624	1051	757.871	-0.050268	0.0674846	-0.743839	0.456974	0.99983
ENSMUSG00000051359	Ncald	5103	6452	8707	5493	5113	9396	6482.15	-0.0502031	0.0636744	-0.787126	0.431208	0.99983
ENSMUSG00000040105	Plpp6	634	813	1100	780	521	1202	809.238	-0.0501877	0.0675918	-0.781634	0.43443	0.99983
ENSMUSG00000048721	Fndc9	25	38	37	20	21	17	26.5543	-0.0501618	0.033893	-1.57957	0.114205	0.99983
ENSMUSG00000043557	Mdga1	749	1254	1139	925	826	1241	1004.31	-0.0501427	0.0674767	-0.737517	0.460808	0.99983
ENSMUSG00000054720	Lrrc8c	196	315	363	237	193	391	271.311	-0.0501314	0.0644912	-0.778274	0.436407	0.99983
ENSMUSG00000047417	Rexo1	487	629	591	517	454	670	554.781	-0.050129	0.0675355	-0.725482	0.468156	0.99983
ENSMUSG00000038143	Stox2	1450	2166	2572	1829	1452	2730	1966.08	-0.0500885	0.066734	-0.760644	0.44687	0.99983
ENSMUSG00000026970	Rbms1	70	94	119	65	74	97	84.8564	-0.0500684	0.0516297	-0.982972	0.325621	0.99983
ENSMUSG00000022376	Adcy8	799	1073	1424	865	828	1525	1045.71	-0.0500246	0.0670072	-0.747397	0.454824	0.99983
ENSMUSG00000046613	Vwa5b2	119	181	164	127	121	167	145.059	-0.0499654	0.0593898	-0.832183	0.405306	0.99983
ENSMUSG00000073680	Tmem88b	37	128	105	44	60	116	76.5299	-0.0499129	0.0487966	-0.872842	0.382749	0.99983
ENSMUSG00000038119	Cdon	83	84	104	68	63	102	83.1334	-0.0498886	0.0513798	-0.946628	0.343828	0.99983
ENSMUSG00000042404	Dennd4b	307	443	463	331	318	505	386.019	-0.0498849	0.0668738	-0.740541	0.458972	0.99983
ENSMUSG00000002413	Braf	2392	3498	4068	2866	2285	4687	3178.79	-0.0498828	0.0662917	-0.761461	0.446382	0.99983
ENSMUSG00000034987	Hrh2	34	55	60	31	21	59	41.2915	-0.0498563	0.0399623	-1.28972	0.197148	0.99983
ENSMUSG00000068264	Ap5s1	102	125	171	102	96	154	121.886	-0.0497854	0.0570427	-0.874518	0.381836	0.99983
ENSMUSG00000040254	Sema3d	104	243	218	114	148	248	171.125	-0.0497846	0.0605653	-0.76732	0.442891	0.99983
ENSMUSG00000064201	Krt2	70	76	115	63	62	91	77.9511	-0.0497489	0.0501452	-0.990908	0.321731	0.99983
ENSMUSG00000041530	Ago1	968	1442	1708	1182	1014	1787	1308.11	-0.0497335	0.0669155	-0.746436	0.455404	0.99983
ENSMUSG00000028690	Mmachc	84	156	158	95	86	172	119.906	-0.0497312	0.0560356	-0.865598	0.386711	0.99983
ENSMUSG00000013698	Pea15a	1322	2257	2397	1668	1451	2654	1889.55	-0.0497299	0.0670764	-0.730481	0.465096	0.99983
ENSMUSG00000032193	Ldlr	175	398	338	185	297	351	283.019	-0.0497149	0.0654631	-0.744898	0.456333	0.99983
ENSMUSG00000033356	Pus7l	56	58	108	61	40	75	64.3548	-0.0496867	0.0470778	-1.07432	0.28268	0.99983
ENSMUSG00000036206	Sh3bp4	558	917	890	618	575	1108	750.586	-0.0496733	0.0675122	-0.72615	0.467747	0.99983
ENSMUSG00000036985	Zdhhc9	232	477	345	289	248	431	328.648	-0.049672	0.0635925	-0.711896	0.476529	0.99983
ENSMUSG00000054008	Ndst1	958	1581	1590	1226	980	1769	1312.25	-0.04967	0.0675246	-0.737934	0.460554	0.99983
ENSMUSG00000020541	Tom1l1	97	122	113	88	63	147	102.594	-0.0496607	0.0528043	-0.935604	0.349477	0.99983
ENSMUSG00000021959	Lats2	169	356	375	214	220	396	275.072	-0.0496439	0.0644559	-0.71108	0.477035	0.99983
ENSMUSG00000022489	Pde1b	1155	1698	2011	1243	1307	2197	1548.85	-0.0496294	0.0661961	-0.751417	0.452402	0.99983
ENSMUSG00000041961	Znrf3	125	235	202	128	147	237	173.617	-0.0496062	0.0607442	-0.784017	0.43303	0.99983
ENSMUSG00000041014	Nrg3	432	645	726	526	417	792	571.228	-0.0495936	0.0674257	-0.745529	0.455952	0.99983
ENSMUSG00000003134	Tbc1d8	160	284	257	190	143	318	216.938	-0.0495777	0.0607333	-0.808969	0.418533	0.99983
ENSMUSG00000034532	Fbxo16	87	66	86	66	48	92	74.2212	-0.0495275	0.0492592	-0.924955	0.354989	0.99983
ENSMUSG00000030539	Sema4b	81	171	182	102	113	159	130.028	-0.0495248	0.0573091	-0.81286	0.416298	0.99983
ENSMUSG00000069833	Ahnak	83	210	140	77	136	164	131.692	-0.0495239	0.0575232	-0.816752	0.41407	0.99983
ENSMUSG00000027220	Syt13	2359	3093	4043	2725	2278	4353	3035.9	-0.0495093	0.06478	-0.768766	0.442033	0.99983
ENSMUSG00000057716	Tmem178b	2660	3430	4024	3135	2234	4716	3266.25	-0.0495069	0.0663218	-0.767189	0.442969	0.99983
ENSMUSG00000037432	Fer1l5	98	201	190	130	103	199	147.675	-0.0494809	0.0573758	-0.826361	0.408599	0.99983
ENSMUSG00000041801	Phlda3	75	110	102	79	70	94	87.8315	-0.0494378	0.0525814	-0.946901	0.343689	0.99983
ENSMUSG00000040021	Lats1	435	649	814	478	484	869	597.338	-0.049437	0.0675902	-0.729369	0.465776	0.99983
ENSMUSG00000024603	Dctn4	1203	2104	2091	1480	1265	2505	1707.87	-0.0494234	0.0675145	-0.719432	0.471875	0.99983
ENSMUSG00000025375	Aatk	3224	4249	4435	3398	3327	4942	3873.47	-0.0493708	0.0645929	-0.754862	0.450332	0.99983
ENSMUSG00000022358	Fbxo32	118	154	199	108	123	195	145.122	-0.0493638	0.059037	-0.84173	0.399939	0.99983
ENSMUSG00000039697	Ncoa7	1094	2094	2062	1411	1309	2297	1649.62	-0.0493431	0.0674031	-0.699241	0.484402	0.99983
ENSMUSG00000024524	Gnal	566	1042	995	763	561	1158	816.828	-0.0493043	0.0668082	-0.732704	0.463739	0.99983
ENSMUSG00000045128	Rpl18a	294	413	438	372	283	415	365.316	-0.0492946	0.0662158	-0.794005	0.427192	0.99983
ENSMUSG00000070000	Fcho1	378	591	569	449	411	594	491.029	-0.0492849	0.0673678	-0.73307	0.463516	0.99983
ENSMUSG00000020495	Smg8	244	340	436	268	258	436	319.788	-0.0492589	0.066125	-0.743924	0.456922	0.99983
ENSMUSG00000045248	Med26	60	94	94	56	58	94	74.0768	-0.0492335	0.0499889	-0.973665	0.330223	0.99983
ENSMUSG00000004360	9330159F19Rik	769	1212	1270	907	749	1526	1033.46	-0.0492315	0.0675876	-0.729685	0.465583	0.99983
ENSMUSG00000061731	Ext1	688	802	1022	755	574	1149	809.031	-0.049219	0.0674674	-0.736993	0.461127	0.99983
ENSMUSG00000060510	Zfp266	582	919	1240	653	694	1308	855.901	-0.0492139	0.0673338	-0.723546	0.469344	0.99983
ENSMUSG00000014959	Gorasp2	686	1016	1162	744	730	1325	911.034	-0.0491902	0.0673534	-0.730278	0.46522	0.99983
ENSMUSG00000045328	Cenpe	21	42	46	15	19	37	28.4572	-0.0491753	0.0353101	-1.39783	0.162165	0.99983
ENSMUSG00000061119	Prcp	62	111	109	77	60	97	83.9677	-0.0491733	0.0509692	-0.967048	0.33352	0.99983
ENSMUSG00000021326	Trim27	274	371	494	290	299	487	357.419	-0.0491694	0.0664974	-0.738764	0.46005	0.99983
ENSMUSG00000036298	Slc2a13	1482	2035	2708	1729	1400	3051	1977.85	-0.0491248	0.0662251	-0.751693	0.452236	0.99983
ENSMUSG00000032517	Mobp	169	406	427	199	247	495	304.009	-0.0490874	0.0649828	-0.697954	0.485206	0.99983
ENSMUSG00000022436	Sh3bp1	998	1437	1648	1121	1078	1770	1305.41	-0.0490841	0.0665201	-0.737097	0.461063	0.99983
ENSMUSG00000035011	Zbtb7a	1095	1472	1624	1307	1074	1679	1353.55	-0.0490472	0.0666674	-0.753264	0.451291	0.99983
ENSMUSG00000019338	Zfp687	246	769	545	270	531	628	481.028	-0.0490419	0.0672668	-0.672119	0.501508	0.99983
ENSMUSG00000022710	Usp7	1986	2888	3361	2275	2115	3672	2632.75	-0.0490385	0.0650796	-0.752899	0.451511	0.99983
ENSMUSG00000049744	Arhgap15	100	107	223	105	92	178	127.916	-0.0490284	0.0566415	-0.819738	0.412366	0.99983
ENSMUSG00000027806	Tsc22d2	448	725	775	570	448	847	615.079	-0.0490239	0.0673303	-0.733447	0.463286	0.99983
ENSMUSG00000027722	Spata5	294	393	478	255	318	550	367.818	-0.0490164	0.0658534	-0.774396	0.438696	0.99983
ENSMUSG00000044952	Kctd21	104	130	127	88	86	151	112.358	-0.0490102	0.0551986	-0.861008	0.389233	0.99983
ENSMUSG00000029999	Tgfa	62	116	134	67	65	139	92.0338	-0.0489965	0.0527709	-0.913227	0.361123	0.99983
ENSMUSG00000078185	Chml	126	197	266	139	120	294	179.413	-0.0489871	0.0611696	-0.81678	0.414054	0.99983
ENSMUSG00000024998	Plce1	137	226	231	123	161	267	183.995	-0.0489797	0.0613529	-0.815461	0.414809	0.99983
ENSMUSG00000022548	Apod	37	97	85	47	33	92	61.2851	-0.048976	0.0437272	-1.06728	0.285847	0.99983
ENSMUSG00000054256	Msi1	38	82	61	38	40	61	52.0355	-0.0489144	0.0439973	-1.04447	0.296266	0.99983
ENSMUSG00000044042	Fmn1	322	432	390	317	334	433	370.211	-0.0488973	0.0665753	-0.712568	0.476113	0.99983
ENSMUSG00000026399	Cd55	75	125	159	84	73	161	107.058	-0.0488756	0.0550159	-0.885119	0.376092	0.99983
ENSMUSG00000049922	Slc35c1	63	119	115	81	53	116	87.8321	-0.0488696	0.0503259	-0.978759	0.327699	0.99983
ENSMUSG00000034269	Setd5	1071	1678	1948	1256	1117	2242	1488.2	-0.0488549	0.0669783	-0.728578	0.46626	0.99983
ENSMUSG00000041540	Sox5	237	376	400	276	235	451	317.955	-0.0488318	0.0655316	-0.742395	0.457848	0.99983
ENSMUSG00000020454	Eif4enif1	518	819	779	616	521	897	675.578	-0.0488308	0.0675343	-0.71694	0.473411	0.99983
ENSMUSG00000030588	Yif1b	192	180	239	181	135	263	195.279	-0.0488248	0.0622755	-0.759327	0.447657	0.99983
ENSMUSG00000051067	Lingo3	742	819	1099	845	631	1115	858.512	-0.0488151	0.0673649	-0.739442	0.459639	0.99983
ENSMUSG00000004665	Cnn2	44	91	90	55	44	80	64.8683	-0.0488075	0.0468181	-1.01161	0.311725	0.99983
ENSMUSG00000037434	Slc30a1	404	480	757	438	420	690	514.49	-0.048787	0.0671499	-0.717495	0.473069	0.99983
ENSMUSG00000038065	Mturn	1553	2233	2806	1799	1733	2856	2095.84	-0.0487774	0.0656489	-0.741809	0.458203	0.99983
ENSMUSG00000006906	Stambp	98	227	192	155	92	196	154.323	-0.0487628	0.0541968	-0.889512	0.373728	0.99983
ENSMUSG00000032487	Ptgs2	191	345	380	221	218	425	283.175	-0.0487488	0.0649463	-0.731143	0.464692	0.99983
ENSMUSG00000040896	Kcnd3	910	1376	1593	1013	960	1841	1232.78	-0.0486872	0.0669987	-0.727531	0.466901	0.99983
ENSMUSG00000079260	Tmppe	98	133	185	106	95	170	126.533	-0.0485588	0.0576431	-0.841822	0.399888	0.99983
ENSMUSG00000060568	Fam78b	105	169	155	140	72	167	131.466	-0.0485131	0.0543832	-0.976698	0.328719	0.99983
ENSMUSG00000013973	Dedd	25	30	50	28	12	21	27.1515	-0.0485113	0.033315	-1.62153	0.104904	0.99983
ENSMUSG00000029641	Rasl11a	35	98	110	43	54	99	68.5373	-0.0484976	0.0481706	-0.892848	0.371939	0.99983
ENSMUSG00000050953	Gja1	108	448	312	158	228	372	256.169	-0.0484878	0.0610587	-0.501161	0.616258	0.99983
ENSMUSG00000056493	Foxk1	722	946	1094	828	700	1152	888.735	-0.0484861	0.0672936	-0.728651	0.466215	0.99983
ENSMUSG00000044835	Ankrd45	377	468	580	401	330	660	454.756	-0.0484815	0.0672217	-0.726733	0.467389	0.99983
ENSMUSG00000031885	Cbfb	140	174	274	119	151	273	179.863	-0.0484512	0.0606311	-0.823652	0.410137	0.99983
ENSMUSG00000061079	Zfp143	152	174	217	151	130	222	171.016	-0.048442	0.0612409	-0.787916	0.430746	0.99983
ENSMUSG00000071281	Zfp65	163	233	303	188	160	303	216.708	-0.0484406	0.0634138	-0.766971	0.443099	0.99983
ENSMUSG00000045665	Mfsd5	173	228	260	189	157	271	208.371	-0.0484336	0.0631753	-0.773672	0.439125	0.99983
ENSMUSG00000037306	Man1c1	158	258	238	198	147	254	204.694	-0.0484316	0.0617065	-0.794863	0.426693	0.99983
ENSMUSG00000018334	Ksr1	2049	2549	2635	2464	1746	2896	2368.82	-0.0484057	0.0660264	-0.761068	0.446616	0.99983
ENSMUSG00000055866	Per2	334	755	627	399	460	752	533.894	-0.0484022	0.0669897	-0.656922	0.511231	0.99983
ENSMUSG00000030518	Fam189a1	787	1093	1151	946	681	1344	975.343	-0.0483832	0.0675855	-0.736089	0.461677	0.99983
ENSMUSG00000049086	Bmyc	13	44	48	14	20	28	26.2168	-0.048372	0.0337765	-1.31667	0.187949	0.99983
ENSMUSG00000020715	Ern1	96	162	167	116	98	162	129.968	-0.0483628	0.057452	-0.83738	0.402379	0.99983
ENSMUSG00000029309	Sparcl1	9433	9889	15525	9764	8800	15522	11160.3	-0.0483484	0.0654594	-0.717746	0.472914	0.99983
ENSMUSG00000052698	Tln2	3590	4424	5234	3793	3420	5916	4295.13	-0.0482585	0.0644814	-0.739974	0.459316	0.99983
ENSMUSG00000009394	Syn2	6444	10854	10644	8135	6801	12232	8914.79	-0.0482492	0.0664623	-0.720139	0.471439	0.99983
ENSMUSG00000022508	Bcl6	524	924	989	723	545	1047	763.934	-0.0482423	0.0672162	-0.719115	0.47207	0.99983
ENSMUSG00000051518	Rps19bp1	115	117	176	114	95	155	126.356	-0.0482273	0.0572474	-0.840396	0.400686	0.99983
ENSMUSG00000034957	Cebpa	111	164	183	126	106	181	141.453	-0.0482254	0.0589263	-0.824076	0.409897	0.99983
ENSMUSG00000091896	Ube2d2a	345	640	621	447	353	728	501.93	-0.0482087	0.0660738	-0.713134	0.475763	0.99983
ENSMUSG00000025198	Erlin1	135	234	268	179	145	252	195.375	-0.0482085	0.0614234	-0.779972	0.435407	0.99983
ENSMUSG00000028630	Dyrk2	761	1069	1406	955	722	1475	1024.24	-0.0481764	0.0674324	-0.730167	0.465288	0.99983
ENSMUSG00000075273	Ttc30b	293	295	439	288	237	466	326.971	-0.0481326	0.0660243	-0.715342	0.474398	0.99983
ENSMUSG00000056211	R3hdm1	1151	2064	1806	1398	879	2012	1502.33	-0.0481204	0.0501684	-0.978514	0.32782	0.99983
ENSMUSG00000066191	Anks6	50	81	77	50	47	71	61.5001	-0.0481019	0.0471076	-1.01023	0.312386	0.99983
ENSMUSG00000037355	Uvssa	69	145	176	83	107	141	115.466	-0.0480963	0.0555957	-0.814576	0.415315	0.99983
ENSMUSG00000037259	Dzank1	2546	4022	4380	3044	2657	5059	3490.13	-0.0480497	0.0660829	-0.724563	0.46872	0.99983
ENSMUSG00000044117	2900011O08Rik	1437	2145	2322	1734	1378	2692	1889.71	-0.0480488	0.0670184	-0.724297	0.468883	0.99983
ENSMUSG00000041828	Abca8a	46	69	77	33	38	87	55.4996	-0.048047	0.0445936	-1.12526	0.260478	0.99983
ENSMUSG00000037410	Tbc1d2b	99	159	182	104	103	192	134.331	-0.0480464	0.0583432	-0.817756	0.413497	0.99983
ENSMUSG00000021273	Fdft1	726	1053	1203	800	769	1341	951.627	-0.0480166	0.0672219	-0.712883	0.475918	0.99983
ENSMUSG00000030134	Rasgef1a	2604	3459	4324	2927	2789	4395	3332.15	-0.0480124	0.0648544	-0.742359	0.45787	0.99983
ENSMUSG00000042810	Krba1	255	331	307	265	229	353	287.859	-0.0479799	0.0653374	-0.713123	0.47577	0.99983
ENSMUSG00000030042	Pole4	427	483	716	439	416	703	515.639	-0.0479726	0.0673143	-0.704719	0.480985	0.99983
ENSMUSG00000044562	Rasip1	43	60	57	32	47	39	46.7921	-0.0479213	0.0420902	-1.21439	0.224598	0.99983
ENSMUSG00000006732	Mettl1	97	92	155	92	75	136	105.155	-0.0479161	0.054746	-0.859875	0.389858	0.99983
ENSMUSG00000035131	Brinp3	122	235	377	136	175	370	218.476	-0.0478223	0.0635073	-0.709579	0.477965	0.99983
ENSMUSG00000038914	Dido1	883	1200	1435	937	899	1626	1126.03	-0.0477494	0.0669886	-0.71337	0.475617	0.99983
ENSMUSG00000026384	Ptpn4	1527	2287	2972	1756	1560	3443	2145.86	-0.0476821	0.0662662	-0.726384	0.467603	0.99983
ENSMUSG00000032366	Tpm1	2473	3201	4100	2778	2540	4245	3136.29	-0.0476771	0.0647501	-0.737157	0.461027	0.99983
ENSMUSG00000036980	Taf6	204	274	286	197	204	320	242.756	-0.0476754	0.0641783	-0.732227	0.46403	0.99983
ENSMUSG00000028759	Hp1bp3	2754	3715	4810	3141	2865	5059	3603.69	-0.0476098	0.0643504	-0.740162	0.459202	0.99983
ENSMUSG00000020181	Nav3	2224	2666	3177	2535	1719	3885	2620.87	-0.047594	0.0668171	-0.733943	0.462984	0.99983
ENSMUSG00000062762	Ei24	358	443	581	394	343	589	439.635	-0.0475938	0.0672346	-0.711793	0.476593	0.99983
ENSMUSG00000025423	Pias2	479	664	852	587	447	902	631.701	-0.047582	0.0675629	-0.721228	0.470769	0.99983
ENSMUSG00000034903	Cobll1	17	40	27	17	9	18	20.9175	-0.0475799	0.0298859	-1.59821	0.109997	0.99983
ENSMUSG00000101892	9130401M01Rik	207	237	308	218	185	303	238.557	-0.0475794	0.0642442	-0.744478	0.456587	0.99983
ENSMUSG00000060882	Kcnd2	2666	4023	4792	3232	2645	5482	3653.61	-0.0475402	0.0661159	-0.724382	0.468831	0.99983
ENSMUSG00000019146	Cacng2	227	338	276	236	198	363	268.102	-0.0475168	0.063359	-0.711879	0.47654	0.99983
ENSMUSG00000033597	Caskin1	1293	1875	1507	1504	1254	1757	1529.97	-0.0474891	0.0669435	-0.698081	0.485126	0.99983
ENSMUSG00000029524	Sirt4	47	86	68	54	40	65	59.1145	-0.0474843	0.0455292	-1.02704	0.304403	0.99983
ENSMUSG00000039830	Olig2	19	57	37	19	16	37	29.405	-0.047474	0.0341599	-1.27972	0.200644	0.99983
ENSMUSG00000026944	Abca2	1951	2670	2597	2199	1923	2940	2351.66	-0.0474714	0.0655194	-0.719398	0.471896	0.99983
ENSMUSG00000001942	Siae	201	229	334	179	219	306	239.092	-0.0474455	0.0624898	-0.768038	0.442465	0.99983
ENSMUSG00000042581	Thsd7b	335	436	524	343	389	483	413.103	-0.0474059	0.0664728	-0.731372	0.464552	0.99983
ENSMUSG00000037071	Scd1	107	460	386	154	248	452	280.123	-0.047389	0.0624973	-0.48072	0.630715	0.99983
ENSMUSG00000000346	Dazap2	353	469	654	408	317	717	464.598	-0.0473875	0.067232	-0.721533	0.470581	0.99983
ENSMUSG00000045994	B3gat1	1245	2121	1847	1576	1254	2194	1667.9	-0.0473716	0.0675721	-0.692568	0.488581	0.99983
ENSMUSG00000048965	Mrgpre	29	61	34	26	21	38	34.3404	-0.0473348	0.0367278	-1.18406	0.23639	0.99983
ENSMUSG00000021738	Atxn7	147	211	223	117	176	243	181.844	-0.0473085	0.0603929	-0.824968	0.40939	0.99983
ENSMUSG00000062115	Rai1	715	1149	976	907	668	1150	912.761	-0.0472992	0.0674549	-0.707444	0.479291	0.99983
ENSMUSG00000079020	Slc45a4	458	818	798	580	519	874	654.576	-0.0472874	0.0674718	-0.682319	0.495037	0.99983
ENSMUSG00000030704	Rab6a	5628	8668	11164	7164	5558	12478	8043.37	-0.0472684	0.0661923	-0.720055	0.471491	0.99983
ENSMUSG00000033350	Chst2	1356	1964	2373	1490	1539	2527	1815.87	-0.0472642	0.0657927	-0.718852	0.472232	0.99983
ENSMUSG00000040721	Zfhx2	167	333	231	241	151	259	227.423	-0.0472278	0.0592075	-0.799762	0.423849	0.99983
ENSMUSG00000072872	Rybp	176	267	323	183	173	378	238.084	-0.0471941	0.0637376	-0.755098	0.45019	0.99983
ENSMUSG00000045314	Sowahb	92	120	113	95	79	111	101.505	-0.0471835	0.0547329	-0.865581	0.38672	0.99983
ENSMUSG00000052415	Tchh	23	36	35	15	16	28	24.8485	-0.0471765	0.0333789	-1.41858	0.156023	0.99983
ENSMUSG00000038538	Ubn2	280	507	490	342	300	572	400.097	-0.0471642	0.0660246	-0.692277	0.488763	0.99983
ENSMUSG00000036391	Sec24a	86	214	195	112	122	203	148.593	-0.0471393	0.0583359	-0.709554	0.477981	0.99983
ENSMUSG00000040111	Gramd1b	3017	4401	4663	3530	2848	5607	3887.9	-0.0470953	0.0663986	-0.713303	0.475659	0.99983
ENSMUSG00000027796	Smad9	81	112	134	85	73	130	99.6152	-0.0470924	0.0544535	-0.87002	0.384289	0.99983
ENSMUSG00000048756	Foxo3	915	1377	1502	1091	949	1653	1212.89	-0.0470648	0.0670435	-0.702974	0.482072	0.99983
ENSMUSG00000042015	Wdr41	225	461	441	262	301	496	350.133	-0.0470531	0.066173	-0.66989	0.502928	0.99983
ENSMUSG00000064030	Pym1	173	169	218	151	152	213	178.402	-0.0470422	0.0604408	-0.748895	0.45392	0.99983
ENSMUSG00000047205	Dusp18	177	359	275	213	187	349	251.97	-0.047012	0.0619682	-0.697472	0.485508	0.99983
ENSMUSG00000052423	B4galt3	178	243	321	197	185	309	231.45	-0.0469055	0.0639939	-0.732958	0.463584	0.99983
ENSMUSG00000022763	Aifm3	307	397	462	344	278	500	372.35	-0.0468964	0.0667213	-0.711606	0.476709	0.99983
ENSMUSG00000003119	Cdk12	436	743	864	557	484	916	639.726	-0.0468938	0.0674931	-0.679952	0.496535	0.99983
ENSMUSG00000034640	Tiparp	143	214	463	183	143	448	242.647	-0.0468936	0.0637113	-0.6889	0.490886	0.99983
ENSMUSG00000004846	Plod3	189	296	368	209	223	366	265.127	-0.0468831	0.0650455	-0.712183	0.476352	0.99983
ENSMUSG00000055567	Unc80	4793	6314	8227	5573	4767	8715	6194.35	-0.0468768	0.0636143	-0.739829	0.459404	0.99983
ENSMUSG00000038775	Vill	44	39	52	28	26	48	39.0557	-0.046849	0.0395891	-1.15218	0.249249	0.99983
ENSMUSG00000029206	Nsun7	61	109	109	50	62	133	82.8771	-0.0468139	0.0504294	-0.963528	0.335283	0.99983
ENSMUSG00000102543	Pcdhgc5	2182	2519	3223	2434	1961	3429	2570.16	-0.0467932	0.0649813	-0.721052	0.470877	0.99983
ENSMUSG00000051853	Arf3	8493	11274	12786	10433	8154	13302	10553.5	-0.0467873	0.0640999	-0.752584	0.4517	0.99983
ENSMUSG00000021910	Nisch	4206	6392	6368	4767	4607	7240	5475.31	-0.0467734	0.0642189	-0.722459	0.470012	0.99983
ENSMUSG00000066415	Msl2	429	869	843	613	510	876	666.905	-0.0467679	0.0668195	-0.664769	0.506198	0.99983
ENSMUSG00000050896	Rtn4rl2	116	161	172	125	103	182	139.971	-0.0467668	0.0587999	-0.798774	0.424421	0.99983
ENSMUSG00000020564	Atxn7l1	90	164	152	125	65	166	122.544	-0.0467561	0.05263	-0.953507	0.340333	0.99983
ENSMUSG00000036002	Fam214b	101	149	198	127	95	178	136.404	-0.0467522	0.0578919	-0.823946	0.40997	0.99983
ENSMUSG00000048355	Arxes1	78	111	127	82	57	144	95.7162	-0.0467392	0.0526591	-0.925273	0.354824	0.99983
ENSMUSG00000037326	Capn15	199	397	306	285	225	302	282.905	-0.0467163	0.06317	-0.745498	0.455971	0.99983
ENSMUSG00000041930	Fam222a	13	42	25	14	8	17	19.1963	-0.046706	0.0283966	-1.57181	0.115994	0.99983
ENSMUSG00000060279	Ap2a1	2681	4146	3743	3223	2623	4479	3416.57	-0.0466831	0.0667693	-0.693838	0.487784	0.99983
ENSMUSG00000045838	Ccdc9b	55	92	135	58	66	114	82.319	-0.0466617	0.0514482	-0.877556	0.380184	0.99983
ENSMUSG00000022206	Npr3	571	776	1040	588	635	1098	755.61	-0.0466591	0.0675503	-0.695827	0.486537	0.99983
ENSMUSG00000041870	Ankrd13a	156	283	323	157	187	382	234.519	-0.0466254	0.0635751	-0.749477	0.45357	0.99983
ENSMUSG00000026960	Arl6ip6	39	74	83	41	38	79	56.1153	-0.0466181	0.0453311	-1.01018	0.312411	0.99983
ENSMUSG00000019891	Dcbld1	131	215	231	151	157	214	179.238	-0.0465797	0.0615517	-0.754733	0.450409	0.99983
ENSMUSG00000026279	Thap4	82	144	114	93	75	129	104.176	-0.046576	0.053736	-0.8328	0.404957	0.99983
ENSMUSG00000035765	Dym	296	572	535	391	325	605	438.199	-0.0465501	0.0658563	-0.676623	0.498645	0.99983
ENSMUSG00000003721	Insig2	246	468	513	291	346	510	381.55	-0.0465376	0.06676	-0.667858	0.504224	0.99983
ENSMUSG00000038366	Lasp1	947	1200	1361	1167	784	1501	1136.76	-0.0464647	0.0673973	-0.729559	0.46566	0.99983
ENSMUSG00000075595	Zfp652	348	603	665	444	389	705	506.379	-0.0463988	0.0671393	-0.67564	0.499269	0.99983
ENSMUSG00000062252	Lhfpl5	8	24	30	6	2	14	12.7637	-0.0463451	0.0236827	-2.08673	0.0369129	0.99983
ENSMUSG00000024076	Vit	20	54	54	20	30	37	34.3689	-0.0463301	0.0379755	-1.16268	0.244959	0.99983
ENSMUSG00000042308	Setd1a	85	149	106	83	77	140	104.383	-0.0462885	0.0529872	-0.808201	0.418975	0.99983
ENSMUSG00000033022	Cdo1	147	171	239	158	107	265	174.015	-0.0461941	0.0610134	-0.79579	0.426154	0.99983
ENSMUSG00000028194	Ddah1	109	171	193	100	97	251	144.837	-0.0461935	0.0573959	-0.861483	0.388972	0.99983
ENSMUSG00000031398	Plxna3	138	308	240	153	172	307	211.158	-0.0461933	0.0613128	-0.687747	0.491612	0.99983
ENSMUSG00000020390	Ube2b	700	1340	1366	914	776	1600	1066.57	-0.0461425	0.0674978	-0.655481	0.512158	0.99983
ENSMUSG00000015653	Steap2	37	62	67	33	35	62	47.5408	-0.0461397	0.0431176	-1.06342	0.28759	0.99983
ENSMUSG00000052539	Magi3	722	932	1192	761	731	1300	910.013	-0.046134	0.0672988	-0.685335	0.493132	0.99983
ENSMUSG00000017664	Slc35c2	491	542	721	464	485	744	563.453	-0.0461279	0.0672493	-0.673182	0.500831	0.99983
ENSMUSG00000060780	Lrrtm1	1247	1898	2032	1592	1232	2212	1657.4	-0.0461015	0.0671768	-0.702004	0.482677	0.99983
ENSMUSG00000071424	Grid2	145	192	270	145	151	269	187.828	-0.0460823	0.0620984	-0.74261	0.457718	0.99983
ENSMUSG00000026880	Stom	41	54	50	35	19	58	41.6275	-0.0460738	0.039357	-1.2244	0.220802	0.99983
ENSMUSG00000064125	Prr36	198	352	287	254	169	357	262.223	-0.0460273	0.061265	-0.748602	0.454097	0.99983
ENSMUSG00000063531	Sema3e	1921	2667	3645	2080	2169	3826	2611.53	-0.0460067	0.065268	-0.70654	0.479853	0.99983
ENSMUSG00000034390	Cmip	1923	3888	2761	2362	1894	3193	2617.81	-0.0459994	0.0542575	-0.785337	0.432256	0.99983
ENSMUSG00000068270	Shroom4	45	59	76	39	28	82	52.0883	-0.0459542	0.043776	-1.10998	0.267008	0.99983
ENSMUSG00000024140	Epas1	73	329	188	127	130	231	171.003	-0.0459254	0.0534295	-0.477357	0.633108	0.99983
ENSMUSG00000029910	Mad2l1	55	83	74	56	46	73	63.7187	-0.0459135	0.0474731	-0.958134	0.337995	0.99983
ENSMUSG00000074102	Rbm15b	681	802	1029	758	656	1015	809.814	-0.0459113	0.067505	-0.68723	0.491938	0.99983
ENSMUSG00000033685	Ucp2	12	16	36	8	7	10	14.0732	-0.0458865	0.0255949	-1.80846	0.0705357	0.99983
ENSMUSG00000061654	Spry3	85	160	171	111	75	187	125.056	-0.0458797	0.0547956	-0.84694	0.397029	0.99983
ENSMUSG00000027363	Usp8	550	864	955	652	596	1046	752.24	-0.0458632	0.0675627	-0.673767	0.500459	0.99983
ENSMUSG00000022009	Nufip1	265	298	484	236	281	474	326.963	-0.0458549	0.0648004	-0.712345	0.476251	0.99983
ENSMUSG00000040225	Prrc2c	2131	3146	3385	2495	2115	3947	2783.62	-0.045844	0.06612	-0.694379	0.487445	0.99983
ENSMUSG00000021240	Abcd4	35	77	75	36	49	60	53.7013	-0.0458317	0.044937	-0.990974	0.321698	0.99983
ENSMUSG00000020241	Col6a2	43	66	58	45	40	42	49.3042	-0.0458219	0.0434145	-1.10449	0.269381	0.99983
ENSMUSG00000068040	Tm9sf4	655	1083	1094	805	653	1302	899.46	-0.0458193	0.0675525	-0.675315	0.499476	0.99983
ENSMUSG00000020091	Eif4ebp2	179	333	298	226	176	354	252.09	-0.0458104	0.0623313	-0.713926	0.475273	0.99983
ENSMUSG00000049717	Lig4	179	310	272	210	171	333	238.494	-0.0458052	0.0624267	-0.713103	0.475782	0.99983
ENSMUSG00000011257	Pabpc4	196	273	392	222	202	390	267.185	-0.0457962	0.0650704	-0.699035	0.48453	0.99983
ENSMUSG00000020275	Rel	54	106	112	74	54	97	79.9937	-0.0457733	0.0495273	-0.917231	0.359022	0.99983
ENSMUSG00000031198	Fundc2	189	347	435	270	193	445	296.883	-0.0456938	0.0634442	-0.709274	0.478154	0.99983
ENSMUSG00000041552	Ptchd1	47	111	92	63	47	94	72.7706	-0.0456889	0.0472666	-0.905134	0.365394	0.99983
ENSMUSG00000030222	Rerg	44	131	79	45	69	94	74.6058	-0.0456817	0.0490034	-0.796989	0.425457	0.99983
ENSMUSG00000096687	Mfsd4b4	114	116	152	69	93	191	118.06	-0.0456657	0.0528494	-0.907149	0.364328	0.99983
ENSMUSG00000071860	2900055J20Rik	104	160	205	121	108	196	143.322	-0.0456605	0.0590726	-0.76677	0.443218	0.99983
ENSMUSG00000042797	Aqp11	55	84	103	61	38	109	71.2123	-0.0456199	0.0480042	-1.00742	0.313732	0.99983
ENSMUSG00000026027	Stradb	124	231	233	166	115	258	180.059	-0.0455868	0.0589347	-0.776104	0.437688	0.99983
ENSMUSG00000016526	Dyrk3	249	327	474	271	265	458	328.324	-0.0455803	0.0660767	-0.684801	0.49347	0.99983
ENSMUSG00000071317	Bves	37	63	78	39	31	72	50.6444	-0.0455618	0.0436889	-1.04791	0.294678	0.99983
ENSMUSG00000032187	Smarca4	2353	3405	3526	2581	2436	4155	2998.32	-0.0455564	0.0654867	-0.689462	0.490533	0.99983
ENSMUSG00000037750	Fam222b	136	213	189	156	128	210	169.201	-0.045544	0.0604344	-0.742827	0.457586	0.99983
ENSMUSG00000019055	Plod1	77	145	162	75	96	175	115.646	-0.0455331	0.0563407	-0.808353	0.418888	0.99983
ENSMUSG00000015668	Pdzd11	160	179	280	144	134	318	192.498	-0.0455024	0.0618089	-0.75937	0.447631	0.99983
ENSMUSG00000037605	Adgrl3	3047	3813	4848	3412	2892	5315	3776.62	-0.0455018	0.0642361	-0.709249	0.47817	0.99983
ENSMUSG00000030527	Crtc3	85	128	108	84	69	133	99.0354	-0.0454852	0.0530095	-0.831051	0.405945	0.99983
ENSMUSG00000027035	Cers6	976	1197	1540	1116	846	1728	1195.35	-0.0454813	0.0669341	-0.692241	0.488786	0.99983
ENSMUSG00000027506	Tpd52	311	575	553	394	357	611	452.075	-0.0454594	0.066706	-0.654839	0.512571	0.99983
ENSMUSG00000032737	Inppl1	110	200	219	120	151	206	162.531	-0.0454289	0.0606156	-0.737104	0.461059	0.99983
ENSMUSG00000054823	Nsd3	934	1523	1510	1165	984	1694	1267.54	-0.0453875	0.0673866	-0.670832	0.502327	0.99983
ENSMUSG00000056966	Gjc3	29	109	66	32	35	92	56.4888	-0.0453767	0.0415161	-0.932301	0.351181	0.99983
ENSMUSG00000027247	Arhgap1	471	691	770	584	430	867	615.465	-0.0453757	0.067378	-0.693826	0.487791	0.99983
ENSMUSG00000030265	Kras	624	1371	1150	846	762	1359	982.521	-0.0453676	0.0671663	-0.6072	0.543718	0.99983
ENSMUSG00000095407	Tmem200c	53	104	98	77	51	77	75.2569	-0.0453589	0.047948	-0.989424	0.322456	0.99983
ENSMUSG00000041986	Elmod1	2666	4202	4811	3489	2683	5248	3714.17	-0.0453547	0.0668073	-0.688855	0.490915	0.99983
ENSMUSG00000019897	Ccdc59	162	201	305	189	148	285	207.285	-0.0453236	0.0628965	-0.729271	0.465836	0.99983
ENSMUSG00000030610	Det1	32	50	56	25	30	48	38.8988	-0.0453168	0.0400496	-1.13607	0.255928	0.99983
ENSMUSG00000007888	Crlf1	97	167	177	103	131	156	135.754	-0.0453132	0.0582549	-0.785866	0.431946	0.99983
ENSMUSG00000024491	Rbm27	648	969	1132	743	676	1275	874.206	-0.0453072	0.0674302	-0.671419	0.501954	0.99983
ENSMUSG00000006435	Neurl1a	764	1209	1162	979	779	1258	1006.24	-0.0452791	0.0675609	-0.683924	0.494023	0.99983
ENSMUSG00000036693	Nop14	108	231	175	127	115	223	157.401	-0.0452786	0.0574613	-0.717722	0.472929	0.99983
ENSMUSG00000039633	Lonrf1	329	550	519	372	352	620	443.481	-0.0452692	0.0668244	-0.659603	0.509509	0.99983
ENSMUSG00000039917	Rhbdd2	204	404	375	279	226	406	305.343	-0.0452278	0.0639159	-0.677053	0.498372	0.99983
ENSMUSG00000022412	Mief1	399	578	733	463	435	745	540.15	-0.0452151	0.067531	-0.667102	0.504707	0.99983
ENSMUSG00000043004	Gng2	1006	1526	2014	1280	952	2274	1433.04	-0.0452109	0.0674646	-0.684968	0.493364	0.99983
ENSMUSG00000052504	Epha3	373	460	658	436	342	663	472.2	-0.0452099	0.0673434	-0.68274	0.494771	0.99983
ENSMUSG00000034118	Tpst1	238	387	399	276	245	457	322.519	-0.0451589	0.0656283	-0.679511	0.496814	0.99983
ENSMUSG00000025077	Dclre1a	54	84	89	52	47	94	67.5036	-0.0451423	0.0482665	-0.934692	0.349947	0.99983
ENSMUSG00000024824	Rad9a	27	31	51	28	14	30	29.3366	-0.0451156	0.0352996	-1.36065	0.173626	0.99983
ENSMUSG00000044288	Cnr1	1661	2653	3323	1857	1989	3676	2413.03	-0.0450967	0.0651829	-0.69186	0.489025	0.99983
ENSMUSG00000007029	Vars	459	581	589	478	449	648	529.556	-0.0450701	0.0675077	-0.655082	0.512415	0.99983
ENSMUSG00000039497	Dse	77	110	150	83	74	142	101.711	-0.0450659	0.0547318	-0.822448	0.410822	0.99983
ENSMUSG00000029712	Actl6b	697	725	1025	807	559	1031	792.193	-0.045058	0.0674785	-0.690606	0.489813	0.99983
ENSMUSG00000053950	Adnp2	422	694	709	460	501	800	579.879	-0.0450458	0.0675696	-0.658364	0.510304	0.99983
ENSMUSG00000026837	Col5a1	19	35	41	17	12	31	24.5062	-0.0450095	0.032841	-1.39085	0.16427	0.99983
ENSMUSG00000032340	Neo1	1098	1469	1748	1269	1106	1845	1388.48	-0.0449964	0.0664238	-0.682718	0.494785	0.99983
ENSMUSG00000030766	Arhgap17	26	48	54	26	22	44	35.0944	-0.0449703	0.0382094	-1.16687	0.243264	0.99983
ENSMUSG00000034614	Pik3ip1	224	360	452	270	292	392	322.714	-0.0449471	0.0653997	-0.68333	0.494398	0.99983
ENSMUSG00000031932	Gpr83	121	238	203	147	131	235	173.506	-0.0449377	0.0597652	-0.706967	0.479587	0.99983
ENSMUSG00000022525	Hrasls	184	179	357	201	167	285	221.571	-0.0449165	0.0617402	-0.694775	0.487196	0.99983
ENSMUSG00000031548	Sfrp1	32	51	52	29	34	33	38.3536	-0.0449124	0.039457	-1.18504	0.236001	0.99983
ENSMUSG00000051510	Mafg	404	620	649	501	403	704	533.06	-0.0448845	0.0673118	-0.675437	0.499398	0.99983
ENSMUSG00000060314	Zfp941	188	202	326	187	170	318	223.879	-0.0448651	0.0633912	-0.696406	0.486175	0.99983
ENSMUSG00000024382	Ercc3	295	473	514	364	339	505	405.329	-0.0448451	0.0668275	-0.67194	0.501622	0.99983
ENSMUSG00000071847	Apcdd1	84	126	135	92	63	158	105.252	-0.0448433	0.0535639	-0.871169	0.383662	0.99983
ENSMUSG00000020950	Foxg1	444	965	695	569	333	697	601.77	-0.0448288	0.0414779	-1.06952	0.284835	0.99983
ENSMUSG00000033684	Qsox1	273	318	420	272	277	409	322.063	-0.0447968	0.0656424	-0.680324	0.496299	0.99983
ENSMUSG00000033713	Foxn3	180	340	319	183	206	414	261.009	-0.0447641	0.0634102	-0.704789	0.480942	0.99983
ENSMUSG00000027893	Ahcyl1	1133	2732	2159	1512	1543	2619	1877.33	-0.0446974	0.0675573	-0.56493	0.572121	0.99983
ENSMUSG00000000326	Comt	529	756	875	550	587	969	689.531	-0.0446483	0.0675765	-0.662592	0.507592	0.99983
ENSMUSG00000022558	Mroh1	538	749	813	635	538	858	675.714	-0.0446308	0.0675832	-0.670651	0.502443	0.99983
ENSMUSG00000037847	Nmrk1	32	44	66	28	27	52	39.677	-0.0446252	0.0403757	-1.10386	0.269653	0.99983
ENSMUSG00000073295	Nudt11	328	477	628	380	358	636	450.371	-0.0446067	0.0672673	-0.65817	0.510429	0.99983
ENSMUSG00000040599	Mis12	173	258	327	186	190	340	236.048	-0.0445303	0.0642617	-0.690036	0.490172	0.99983
ENSMUSG00000041417	Pik3r1	1695	2057	2919	1711	1739	3150	2132.72	-0.0444737	0.066311	-0.671029	0.502202	0.99983
ENSMUSG00000019312	Grb7	18	27	29	10	14	16	18.7484	-0.0444583	0.0296072	-1.54682	0.121908	0.99983
ENSMUSG00000053110	Yap1	42	41	67	35	32	46	43.1964	-0.044451	0.0410916	-1.08082	0.279778	0.99983
ENSMUSG00000047141	Zfp654	331	442	628	388	321	646	440.671	-0.0444504	0.0672063	-0.66592	0.505462	0.99983
ENSMUSG00000013629	Cad	221	286	317	206	226	354	262.624	-0.0444427	0.0645247	-0.683723	0.49415	0.99983
ENSMUSG00000034936	Arl4d	89	97	164	77	86	147	105.984	-0.0444395	0.0542737	-0.80943	0.418268	0.99983
ENSMUSG00000057706	Mex3b	261	332	344	288	222	391	301.593	-0.0444315	0.0655734	-0.680861	0.495959	0.99983
ENSMUSG00000003099	Ppp5c	962	1344	1339	1033	1031	1491	1183.31	-0.0444104	0.066813	-0.65726	0.511014	0.99983
ENSMUSG00000005893	Nr2c2	1036	1561	1761	1210	1108	1952	1392.76	-0.0443858	0.0666397	-0.664086	0.506636	0.99983
ENSMUSG00000030772	Dkk3	8633	10182	14319	9730	8382	14469	10657.7	-0.0443656	0.0637996	-0.693367	0.488079	0.99983
ENSMUSG00000040136	Abcc8	384	561	579	445	378	650	487.983	-0.0443655	0.0673005	-0.659655	0.509475	0.99983
ENSMUSG00000038555	Reep2	658	992	991	752	650	1186	847.818	-0.0443635	0.0675835	-0.650876	0.515126	0.99983
ENSMUSG00000035934	Pknox2	279	433	426	298	280	523	361.501	-0.0443605	0.0660317	-0.662364	0.507738	0.99983
ENSMUSG00000022021	Diaph3	30	47	72	27	31	54	41.3436	-0.0443547	0.0408965	-1.06812	0.285465	0.99983
ENSMUSG00000029151	Slc30a3	345	545	458	457	299	522	432.394	-0.0443452	0.0654921	-0.713652	0.475442	0.99983
ENSMUSG00000048616	Nog	50	59	63	49	40	46	51.6225	-0.0443202	0.0441719	-1.05739	0.290332	0.99983
ENSMUSG00000062296	Trank1	956	1876	1655	1133	1236	1949	1422.39	-0.0443086	0.0671865	-0.625913	0.531372	0.99983
ENSMUSG00000031785	Adgrg1	93	273	199	103	132	280	169.429	-0.0442561	0.0571287	-0.683788	0.494109	0.99983
ENSMUSG00000078864	Gm14322	49	42	79	36	42	50	49.1561	-0.0442289	0.0415857	-1.05491	0.291465	0.99983
ENSMUSG00000037697	Ddhd1	366	591	666	405	406	770	512.153	-0.0442114	0.0673866	-0.653094	0.513696	0.99983
ENSMUSG00000078816	Prkcg	7456	12842	12066	9761	7766	13939	10348.4	-0.044211	0.0670218	-0.656892	0.511251	0.99983
ENSMUSG00000022401	Xpnpep3	142	285	263	193	154	285	212.797	-0.0442073	0.0610987	-0.690523	0.489865	0.99983
ENSMUSG00000018377	Vezf1	141	243	276	181	145	287	203.662	-0.0441832	0.0618872	-0.706841	0.479665	0.99983
ENSMUSG00000019775	Rgs17	910	1340	1493	1073	837	1814	1197.48	-0.0441645	0.0675455	-0.66642	0.505143	0.99983
ENSMUSG00000023018	Smarcd1	514	970	848	700	538	978	736.829	-0.0441625	0.066807	-0.645182	0.518809	0.99983
ENSMUSG00000066189	Cacng3	325	524	500	445	264	581	427.607	-0.0441447	0.0644056	-0.743667	0.457078	0.99983
ENSMUSG00000032175	Tyk2	88	143	182	109	95	163	125.269	-0.0441298	0.0570041	-0.76436	0.444653	0.99983
ENSMUSG00000018387	Shroom1	44	75	74	42	46	69	56.8452	-0.0441076	0.045967	-0.945369	0.344471	0.99983
ENSMUSG00000039405	Prss23	43	70	73	35	32	89	53.8745	-0.0441056	0.0435688	-1.06741	0.285788	0.99983
ENSMUSG00000061414	Cracr2a	19	16	31	8	10	14	16.0489	-0.0440645	0.0272558	-1.63886	0.101242	0.99983
ENSMUSG00000040321	Zfp770	321	454	552	404	310	555	420.662	-0.0440366	0.0668358	-0.681276	0.495697	0.99983
ENSMUSG00000098923	Tmem185b	128	145	160	136	88	180	137.355	-0.0440119	0.0582094	-0.778736	0.436135	0.99983
ENSMUSG00000054693	Adam10	741	1570	1455	1048	937	1562	1177.76	-0.0439763	0.0675109	-0.598084	0.549784	0.99983
ENSMUSG00000031706	Rfx1	109	126	107	132	63	111	109.308	-0.0439748	0.0541145	-0.925005	0.354963	0.99983
ENSMUSG00000003033	Ap1m1	267	558	469	325	344	548	405.449	-0.0439666	0.066307	-0.607056	0.543814	0.99983
ENSMUSG00000047181	Samd14	128	245	200	137	151	240	178.494	-0.0439378	0.060861	-0.677203	0.498277	0.99983
ENSMUSG00000009731	Kcnd1	59	122	100	62	65	116	84.2481	-0.043928	0.0509617	-0.809391	0.41829	0.99983
ENSMUSG00000007850	Hnrnph1	1131	1420	1604	1138	1205	1720	1349.52	-0.0439146	0.0670283	-0.649707	0.515882	0.99983
ENSMUSG00000014470	Rnf166	91	141	178	105	100	161	125.103	-0.0438598	0.0573308	-0.75795	0.448481	0.99983
ENSMUSG00000031227	Magee1	2130	2710	3075	2440	1880	3578	2572.1	-0.0438502	0.0658566	-0.67213	0.501501	0.99983
ENSMUSG00000042510	AA986860	7	20	26	6	1	6	10.2411	-0.0438308	0.02106	-2.33568	0.0195077	0.99983
ENSMUSG00000001036	Epn2	1227	2026	1902	1475	1352	2182	1654.83	-0.043811	0.0668791	-0.643845	0.519676	0.99983
ENSMUSG00000037813	D630003M21Rik	27	75	63	33	43	46	46.6171	-0.0438047	0.0421908	-0.969221	0.332435	0.99983
ENSMUSG00000036377	C530008M17Rik	582	1115	954	779	629	1116	838.571	-0.0437882	0.0671315	-0.625668	0.531533	0.99983
ENSMUSG00000036256	Igfbp7	45	49	57	41	32	44	44.7515	-0.0437849	0.0421584	-1.06466	0.28703	0.99983
ENSMUSG00000049672	Zbtb14	209	240	287	203	174	333	235.166	-0.043784	0.0638136	-0.6771	0.498342	0.99983
ENSMUSG00000034998	Foxn2	222	371	549	237	292	564	350.474	-0.0437602	0.0664936	-0.652741	0.513923	0.99983
ENSMUSG00000033308	Dpyd	99	153	180	107	106	180	132.878	-0.0437386	0.058361	-0.74318	0.457373	0.99983
ENSMUSG00000032377	Plscr4	28	39	61	18	28	47	35.0413	-0.0437282	0.0380353	-1.18313	0.236758	0.99983
ENSMUSG00000056553	Ptprn2	4449	7055	6951	5352	4819	7896	5942.72	-0.0437117	0.0651012	-0.666621	0.505014	0.99983
ENSMUSG00000050074	Spink8	509	460	826	525	409	810	572.066	-0.0437088	0.0673992	-0.617942	0.536614	0.99983
ENSMUSG00000039879	Heca	517	672	967	568	539	991	681.737	-0.0437007	0.0675771	-0.644041	0.519549	0.99983
ENSMUSG00000039849	Pcif1	310	474	540	366	343	555	419.245	-0.0436753	0.0670768	-0.64879	0.516474	0.99983
ENSMUSG00000054808	Actn4	299	500	406	345	264	551	383.122	-0.0436613	0.0641976	-0.656826	0.511293	0.99983
ENSMUSG00000022863	Btg3	55	79	69	54	53	59	61.8142	-0.0436601	0.0472372	-0.939409	0.347521	0.99983
ENSMUSG00000051390	Zbtb22	291	296	443	330	253	387	329.212	-0.0436083	0.0655027	-0.68884	0.490924	0.99983
ENSMUSG00000045302	Preb	280	521	467	327	365	503	401.492	-0.0435823	0.0669287	-0.626008	0.53131	0.99983
ENSMUSG00000038425	Poli	51	82	116	70	35	105	72.3435	-0.0435802	0.0473128	-1.00253	0.316085	0.99983
ENSMUSG00000044068	Zrsr1	315	490	519	410	259	616	418.801	-0.0435743	0.0650228	-0.71622	0.473856	0.99983
ENSMUSG00000033721	Vav3	81	154	205	93	117	180	131.836	-0.0435733	0.0578077	-0.711693	0.476655	0.99983
ENSMUSG00000019558	Slc6a8	350	552	556	437	323	650	463.372	-0.0435683	0.0663988	-0.667883	0.504208	0.99983
ENSMUSG00000089774	Slc5a3	781	1223	1419	880	869	1620	1087.28	-0.0435603	0.0671137	-0.647012	0.517624	0.99983
ENSMUSG00000021846	Peli2	55	94	100	54	65	92	74.5343	-0.0435391	0.0501842	-0.860649	0.389432	0.99983
[truncated: 14,924 more rows]

## Sheet: Ceolin CA1 Fmr1 KO TRAP DESeq2
Ensembl Gene	Gene Symbol	WT TRAP Rep1 counts	WT TRAP Rep2 counts	WT TRAP Rep3 counts	WT TRAP Rep4 counts	WT TRAP Rep5 counts	WT TRAP Rep6 counts	KO TRAP Rep1 counts	KO TRAP Rep2 counts	KO TRAP Rep3 counts	KO TRAP Rep4 counts	KO TRAP Rep5 counts	KO TRAP Rep6 counts	baseMean	log2FoldChange	lfcSE	stat	pvalue	padj
ENSMUSG00000000838	Fmr1	3817	2881	3639	2911	2874	2880	83	71	76	134	34	74	1733.41	-0.560391	0.0505924	-18.6678	9.04328e-78	1.65058e-73
ENSMUSG00000021091	Serpina3n	4061	2092	2892	2382	2372	2418	1773	1705	1832	1225	1773	1612	2198.14	-0.553469	0.0655654	-8.45027	2.90632e-17	2.65231e-13
ENSMUSG00000022441	Efcab6	1743	1180	1095	1281	969	1259	1002	986	677	726	777	868	1059.96	-0.498126	0.0649534	-7.69391	1.42703e-14	8.68206e-11
ENSMUSG00000064023	Klk8	1765	813	931	975	887	888	681	719	706	478	729	641	856.431	-0.397049	0.0668978	-5.90018	3.63096e-09	1.32544e-05
ENSMUSG00000031133	Arhgef6	1237	1045	1255	1047	923	859	823	915	820	862	900	833	964.94	-0.348391	0.0631228	-5.53642	3.08724e-08	9.39139e-05
ENSMUSG00000016942	Tmprss6	304	100	155	87	146	163	107	54	52	31	175	75	119.328	-0.303659	0.0582243	-5.41933	5.98238e-08	0.000155986
ENSMUSG00000049577	Zfpm1	1712	1361	1566	1069	1366	1237	1071	1247	1144	1025	1131	1203	1268.53	-0.303588	0.0653907	-4.68268	2.8315e-06	0.00304004
ENSMUSG00000078591	Hs3st4	5786	4087	6391	4151	4203	4100	4343	4568	3867	3696	4817	3946	4478.01	-0.302502	0.0571626	-5.29418	1.19553e-07	0.000272761
ENSMUSG00000032024	Clmp	1337	1133	1385	1180	1128	876	812	785	1169	1050	1177	848	1079.14	-0.297782	0.0657462	-4.59047	4.42243e-06	0.00366901
ENSMUSG00000075270	Pde11a	468	548	841	639	489	612	352	551	283	559	615	374	531.014	-0.287738	0.0666671	-4.33695	1.44471e-05	0.00753396
ENSMUSG00000032807	Alox12b	1874	998	1475	1206	1236	1323	1058	1107	1020	856	1129	1447	1231.71	-0.284752	0.0665848	-4.32229	1.54417e-05	0.00761732
ENSMUSG00000070348	Ccnd1	6550	4212	4859	4136	3956	3956	4044	4585	3766	3493	4662	3871	4325.17	-0.281175	0.0606592	-4.62118	3.81569e-06	0.0034822
ENSMUSG00000025262	Fam120c	1666	1298	1574	1209	1220	1037	1354	1061	896	1260	1379	1087	1247.56	-0.278565	0.0627837	-4.44495	8.79124e-06	0.00573063
ENSMUSG00000042388	Dlgap3	12663	10817	12364	9706	10036	9746	9087	9441	9570	10777	11877	9350	10450	-0.271815	0.0551916	-4.94699	7.5371e-07	0.00137567
ENSMUSG00000036782	Klhl13	3606	2400	2590	2255	2149	2333	2440	2512	1745	2043	2981	2252	2422.76	-0.270885	0.0583472	-4.62348	3.77355e-06	0.0034822
ENSMUSG00000037035	Inhbb	1467	1129	1284	1099	1010	1085	1058	1060	963	989	1222	1084	1119.92	-0.264309	0.0608516	-4.34948	1.36462e-05	0.00753396
ENSMUSG00000040972	Igsf21	941	803	757	670	697	738	665	668	534	702	977	542	721.436	-0.257932	0.0653392	-3.96535	7.32892e-05	0.0212329
ENSMUSG00000020848	Doc2b	19937	12418	15322	11262	11906	12084	12748	13660	11972	9933	13028	13290	13080.9	-0.25764	0.0604942	-4.25208	2.11792e-05	0.0092039
ENSMUSG00000022887	Masp1	453	250	274	300	342	248	240	275	167	196	164	197	262.412	-0.256467	0.0627382	-4.16538	3.10837e-05	0.0113468
ENSMUSG00000042826	Fgf11	2493	1993	2369	2069	1715	1782	1693	2174	1760	1621	2235	1783	1970.91	-0.254864	0.0615883	-4.17048	3.03962e-05	0.0113223
ENSMUSG00000107877	Gm43951	376	379	415	441	508	287	318	245	313	415	372	238	363.925	-0.2513	0.0664657	-3.75263	0.000174987	0.0343425
ENSMUSG00000040624	Plekhg1	2802	1738	2046	1557	1896	1460	1897	1771	1627	1304	2046	1654	1804.71	-0.2482	0.0632411	-3.88905	0.000100636	0.0251618
ENSMUSG00000026354	Lct	5075	3212	3716	2662	3340	2618	3266	2876	3398	1913	3690	3139	3224.61	-0.243304	0.0652676	-3.73144	0.000190388	0.0360579
ENSMUSG00000026991	Pkp4	23160	21412	26943	20800	20015	19890	19689	19933	20751	22007	22112	20713	21496.9	-0.24165	0.0533525	-4.53653	5.71883e-06	0.00434917
ENSMUSG00000020891	Alox8	150	106	177	154	100	141	76	58	101	99	101	108	115.973	-0.240058	0.0611254	-4.00993	6.07364e-05	0.0188926
ENSMUSG00000031618	Nr3c2	16182	11329	12966	10616	10735	10532	11138	11984	11001	9141	12208	11529	11587.6	-0.239549	0.0595301	-4.03505	5.45908e-05	0.0181162
ENSMUSG00000063531	Sema3e	6525	4533	5542	4794	4354	4021	5078	5106	3826	3496	4987	4790	4734.5	-0.238841	0.0624449	-3.84308	0.000121499	0.0277198
ENSMUSG00000061436	Hipk2	847	942	1335	1089	977	501	708	527	803	959	1061	687	871.978	-0.238562	0.0670744	-3.49124	0.000480781	0.063131
ENSMUSG00000020866	Cacna1g	1862	1444	1614	1525	1443	1332	1365	1408	1267	1162	2097	1304	1476.05	-0.236791	0.0624359	-3.81358	0.000136966	0.0300026
ENSMUSG00000022416	Cacna1i	7684	6532	8524	5340	6230	6021	5766	6885	5798	5513	7615	6680	6523.1	-0.233397	0.0548222	-4.28385	1.83687e-05	0.00817721
ENSMUSG00000043673	Kcns3	510	639	667	587	451	531	430	478	504	557	594	451	536.608	-0.233049	0.0660366	-3.5008	0.000463867	0.0618118
ENSMUSG00000028458	Tesk1	2416	1902	2493	1746	1916	1613	1940	1682	1618	1850	2151	1926	1929.93	-0.232208	0.0614842	-3.78087	0.000156283	0.0313518
ENSMUSG00000019891	Dcbld1	858	715	861	568	606	591	731	560	534	672	654	559	657.141	-0.231615	0.0660474	-3.52472	0.000423935	0.0598002
ENSMUSG00000047976	Kcna1	1205	1502	2134	1705	1427	886	1240	922	1350	1690	1319	1086	1382.29	-0.229779	0.0669454	-3.35304	0.000799303	0.0855201
ENSMUSG00000049176	Frmpd4	4696	3491	3873	3515	3337	3042	3922	2862	3041	3294	4027	3557	3540.24	-0.229468	0.0589968	-3.90012	9.61467e-05	0.0243732
ENSMUSG00000042700	Sipa1l1	23432	19891	23489	17109	18761	15280	18406	17732	17132	18202	23317	17783	19104.9	-0.229146	0.0540722	-4.23628	2.27254e-05	0.00964615
ENSMUSG00000041592	Sdk2	718	701	894	797	717	755	774	578	605	708	705	715	727.218	-0.228938	0.0663404	-3.43701	0.000588178	0.0725367
ENSMUSG00000044933	Sstr3	4806	4614	5859	4235	4317	4282	3948	4577	4058	4630	5761	4246	4596.78	-0.228643	0.0512015	-4.477	7.56988e-06	0.00531406
ENSMUSG00000027381	Bcl2l11	428	437	641	463	314	346	319	343	414	529	351	309	410.013	-0.228133	0.066905	-3.44446	0.000572211	0.0710476
ENSMUSG00000055540	Epha6	4770	3100	3745	2743	3089	2862	3151	3544	2718	2212	3391	3550	3224.06	-0.227644	0.06395	-3.58204	0.00034092	0.053642
ENSMUSG00000015568	Lpl	8788	6452	7695	5412	5496	5669	6582	6086	6152	5123	7932	5866	6380.44	-0.227589	0.0536729	-4.23044	2.33234e-05	0.00967498
ENSMUSG00000021662	Arhgef28	4131	2547	3693	2952	2837	2749	3104	3126	2453	2764	3357	2878	3031.3	-0.226959	0.059901	-3.78116	0.0001561	0.0313518
ENSMUSG00000026872	Zeb2	23157	15780	19320	14578	14722	14515	16191	16630	15042	12176	18788	17290	16411.8	-0.226335	0.0587901	-3.85464	0.000115902	0.0274733
ENSMUSG00000036578	Fxyd7	2207	1754	1983	1526	1585	1739	1729	1712	1360	1304	2508	1719	1743.48	-0.225962	0.0600873	-3.78082	0.000156312	0.0313518
ENSMUSG00000038156	Spon1	7825	5398	6096	5203	4878	5430	6231	6039	4525	5190	6472	5124	5659.97	-0.225655	0.0519177	-4.3384	1.43525e-05	0.00753396
ENSMUSG00000033740	St18	668	582	766	652	560	488	593	564	435	628	473	526	580.71	-0.22462	0.0669883	-3.39016	0.000698526	0.0799897
ENSMUSG00000007908	Hmgcll1	802	709	881	767	621	632	725	602	631	690	764	641	705.31	-0.224097	0.0640746	-3.49411	0.000475639	0.0629084
ENSMUSG00000038463	Olfml2b	2848	1884	2024	1650	1783	1903	1900	2091	1764	1613	1869	1826	1927.16	-0.223909	0.063555	-3.52237	0.000427708	0.0598002
ENSMUSG00000035168	Tanc1	9895	7373	9842	7352	7308	6976	7639	8181	7418	6497	8628	7962	7895.89	-0.222795	0.0569972	-3.92529	8.66258e-05	0.0229144
ENSMUSG00000039911	Spsb1	762	672	984	801	757	631	604	491	912	690	611	658	723.151	-0.222764	0.0670746	-3.40585	0.000659593	0.0780128
ENSMUSG00000027544	Nfatc2	1107	1008	1256	987	964	840	993	812	1090	955	885	808	980.745	-0.221734	0.0659355	-3.39731	0.000680518	0.0786127
ENSMUSG00000031563	Wwc2	4806	3087	3943	2884	3122	3106	3962	3383	2720	2719	3757	3455	3383.44	-0.221619	0.0563929	-3.92951	8.51191e-05	0.0229144
ENSMUSG00000023328	Ache	2072	1716	1941	1598	1600	1537	1706	1522	1630	1465	2317	1386	1696.2	-0.220188	0.0597114	-3.69934	0.000216162	0.0390632
ENSMUSG00000041923	Nol4	4790	3600	4563	3338	3455	3433	3999	3424	3266	3778	4797	3233	3773.34	-0.218579	0.0530816	-4.11881	3.80835e-05	0.0131151
ENSMUSG00000050663	Trhde	1421	1465	2044	1309	1195	976	1291	974	1307	1316	1311	1255	1322.34	-0.218504	0.066174	-3.29398	0.000987784	0.0956945
ENSMUSG00000041710	Trpc5	480	440	596	454	396	307	341	327	311	381	519	393	410.692	-0.218068	0.067001	-3.26365	0.00109988	0.102424
ENSMUSG00000037624	Kcnk2	3893	2695	3615	2479	2209	2696	3049	2651	2408	2367	3729	2500	2821.74	-0.217962	0.0589193	-3.68476	0.000228914	0.0405645
ENSMUSG00000030263	Lrmp	440	247	419	229	294	298	295	207	263	185	387	310	294.953	-0.217764	0.067031	-3.26555	0.0010925	0.102258
ENSMUSG00000000296	Tpd52l1	1677	1138	1423	1154	1122	1217	1544	1165	922	1270	1295	1100	1244.93	-0.217328	0.0616308	-3.55792	0.000373803	0.0568555
ENSMUSG00000055421	Pcdh9	4244	4698	5412	4077	4671	3646	4145	3043	3652	4899	5114	4032	4307.26	-0.216519	0.0648665	-3.32172	0.000894643	0.089337
ENSMUSG00000051527	Usp29	1380	1133	1531	1322	1220	1171	1313	1037	978	1429	1560	1119	1261.17	-0.215081	0.0609117	-3.53227	0.000412014	0.0592307
ENSMUSG00000025348	Itga7	1988	1632	2050	1692	1274	1211	1562	1374	1876	1230	1730	1274	1570.86	-0.21503	0.0646297	-3.34166	0.000832793	0.0863644
ENSMUSG00000017400	Stac2	2998	3766	4181	3455	2998	2504	2351	2430	3617	3514	2840	3197	3189.79	-0.21477	0.0662424	-3.30127	0.000962496	0.0944488
ENSMUSG00000028782	Adgrb2	31829	21896	24411	17729	20742	21405	22726	24385	20136	16964	28055	21401	22443.1	-0.213469	0.0545219	-3.90567	9.39648e-05	0.0241556
ENSMUSG00000022883	Robo1	2377	2145	2510	2283	2163	1789	2122	1801	1928	2375	2404	2017	2160.65	-0.213128	0.0606769	-3.51106	0.000446317	0.0613223
ENSMUSG00000021747	4930452B06Rik	398	292	364	238	313	317	261	277	298	234	275	251	294.725	-0.211952	0.066619	-3.20468	0.00135213	0.11269
ENSMUSG00000022358	Fbxo32	1630	1347	1887	1273	1349	1013	1349	1363	1471	1109	1196	1209	1351.79	-0.210426	0.0656149	-3.23178	0.00123023	0.10824
ENSMUSG00000055489	Ano5	165	188	252	244	159	122	135	98	142	195	90	123	162.808	-0.210281	0.0606004	-3.55404	0.000379357	0.0572233
ENSMUSG00000022021	Diaph3	405	229	298	281	184	233	272	234	195	265	190	202	248.739	-0.210125	0.0667736	-3.13224	0.00173479	0.124715
ENSMUSG00000074505	Fat3	4767	4186	4561	3735	3794	3393	4117	3676	3831	3801	4108	3810	3981.02	-0.209065	0.0595189	-3.52144	0.000429204	0.0598002
ENSMUSG00000003573	Homer3	1146	692	956	784	767	675	802	834	638	656	1007	700	797.14	-0.208019	0.0653234	-3.16744	0.00153785	0.119442
ENSMUSG00000064368	mt-Nd6	15717	21451	27717	22132	19238	18380	15998	16953	20097	23535	20995	21618	20480.2	-0.207691	0.060719	-3.33764	0.000844926	0.0866214
ENSMUSG00000030499	Kctd15	903	1038	1070	717	791	736	667	755	958	757	811	790	838.306	-0.206331	0.0664913	-3.14231	0.00167619	0.123258
ENSMUSG00000042659	Arrdc4	2455	2603	3171	2746	2072	1679	2010	2147	2601	2226	1904	2369	2351.94	-0.206135	0.0662304	-3.15207	0.00162117	0.121269
ENSMUSG00000009075	Cabp7	13874	9290	11103	8428	8447	9021	8932	10540	10627	6804	10245	9385	9695.86	-0.206009	0.0631662	-3.29339	0.000989871	0.0956945
ENSMUSG00000056258	Kcnq3	16983	12631	15439	11276	11950	10413	12625	13757	11220	10996	13639	13029	12764.4	-0.205552	0.0587408	-3.50688	0.000453395	0.0613223
ENSMUSG00000050505	Pcdh20	6712	4485	5740	4648	4127	4509	5331	5277	4419	4160	5112	4819	4917.98	-0.205494	0.0567597	-3.62088	0.000293598	0.0491629
ENSMUSG00000024517	Grp	436	473	495	327	323	431	391	406	245	350	424	385	390.123	-0.205248	0.0670728	-3.05108	0.00228023	0.149708
ENSMUSG00000005672	Kit	4975	4878	5528	4629	3744	4248	4900	4864	4127	4583	4487	4334	4609.22	-0.204969	0.0542752	-3.77674	0.000158894	0.0315231
ENSMUSG00000025153	Fasn	10974	8060	8017	7093	7791	6629	7984	7759	7061	7338	10070	6997	7922.94	-0.204838	0.0560812	-3.63484	0.000278153	0.0470079
ENSMUSG00000064367	mt-Nd5	18910	24477	32350	25813	23472	18570	21558	18816	21138	27944	25698	21082	23405	-0.204371	0.0628652	-3.13919	0.00169416	0.123258
ENSMUSG00000049336	Tenm2	9317	8720	10234	7304	8143	7697	8127	7688	7822	8495	9565	8361	8442.84	-0.203958	0.0558531	-3.65271	0.000259484	0.0442898
ENSMUSG00000022594	Lynx1	23530	22630	27745	19529	18584	17682	21559	19309	21359	20203	23767	20034	21258.6	-0.203896	0.0536344	-3.79665	0.000146665	0.0307693
ENSMUSG00000026490	Cdc42bpa	15635	12985	16274	12179	12707	10894	13816	12512	11409	12937	15630	12711	13229.9	-0.203666	0.0530411	-3.83762	0.000124233	0.0277198
ENSMUSG00000102543	Pcdhgc5	4830	4119	4287	3804	4536	3044	3892	3659	3215	4298	4916	3701	4012.61	-0.203591	0.0606433	-3.3432	0.00082817	0.0863644
ENSMUSG00000028630	Dyrk2	5903	5989	7485	5848	4912	4655	5207	5246	5952	6175	5218	5496	5694.34	-0.202149	0.0597109	-3.40146	0.000670275	0.0780128
ENSMUSG00000041313	Slc7a1	2585	2244	2767	2125	2102	2062	2245	2109	1989	2341	2656	2220	2278.93	-0.201954	0.0560118	-3.60838	0.000308112	0.0506637
ENSMUSG00000050074	Spink8	5645	2705	3811	2879	2643	3450	3222	3669	2807	1999	3951	3580	3326.35	-0.201924	0.0663167	-3.00291	0.00267412	0.166014
ENSMUSG00000049252	Lrp1b	1568	1147	1398	1119	1219	1177	1197	1057	1059	1247	1731	1123	1243.31	-0.201615	0.0603872	-3.35076	0.00080591	0.0855201
ENSMUSG00000058230	Arhgap35	15575	13262	16290	12219	12461	11653	13398	12571	11665	13836	16276	12764	13419.8	-0.200822	0.0508321	-3.95248	7.73445e-05	0.0217183
ENSMUSG00000020389	Cdkl3	641	396	562	383	407	454	484	468	400	306	545	372	447.628	-0.199155	0.0668628	-2.98244	0.00285962	0.172257
ENSMUSG00000024912	Fosl1	550	476	585	370	507	506	433	456	381	419	582	496	479.273	-0.19905	0.0662134	-3.00886	0.00262233	0.164002
ENSMUSG00000040712	Camta2	37806	26921	31467	24721	27293	23289	27695	26928	27496	22396	32493	28509	27942.3	-0.198987	0.0590682	-3.37222	0.000745662	0.0834958
ENSMUSG00000016382	Pls3	34268	23383	26130	21348	23100	24528	27523	26770	20171	21879	30504	24700	25149.5	-0.198879	0.0498375	-3.98197	6.83452e-05	0.0201199
ENSMUSG00000021745	Ptprg	3794	3223	3534	3247	2927	2634	3586	3032	2553	3503	3074	2977	3170.3	-0.1981	0.0601254	-3.31712	0.000909493	0.0902178
ENSMUSG00000043463	Rab9b	3002	2385	3256	2209	2088	2119	2581	2400	2318	2398	2326	2418	2451.08	-0.197573	0.0589507	-3.36669	0.00076075	0.0846321
ENSMUSG00000031617	Tmem184c	2600	2218	2243	1906	1940	1885	2460	2033	1674	2069	2622	1767	2101.92	-0.197382	0.0565459	-3.50074	0.000463961	0.0618118
ENSMUSG00000031561	Tenm3	5362	4504	5439	4175	4691	3813	5148	5162	3528	3727	4648	4571	4552.44	-0.197079	0.0630492	-3.15295	0.00161632	0.121269
ENSMUSG00000022306	Zfpm2	354	393	445	358	398	312	335	291	360	364	322	267	353.576	-0.196797	0.0665551	-2.95531	0.00312354	0.17928
ENSMUSG00000039834	Zfp335	620	460	552	398	483	460	527	321	439	401	645	408	472.675	-0.196253	0.0668121	-2.97733	0.00290768	0.17287
ENSMUSG00000032452	Clstn2	5531	5078	5435	3752	4098	4291	4660	4674	4295	4294	5280	4456	4634.24	-0.196165	0.0536901	-3.65256	0.000259643	0.0442898
ENSMUSG00000071636	Rimbp3	368	250	317	217	272	223	288	268	173	180	310	214	254.398	-0.195876	0.0667142	-2.9537	0.00313992	0.179434
ENSMUSG00000030102	Itpr1	36437	25945	31491	25070	25508	22869	29829	26597	23451	24961	34190	26821	27505.1	-0.195163	0.0506074	-3.84805	0.000119061	0.0277198
ENSMUSG00000026065	Slc9a4	538	660	928	719	551	460	575	547	652	740	558	445	618.002	-0.195131	0.0665594	-2.8843	0.00392287	0.194566
ENSMUSG00000011877	Git1	34523	24205	28465	20226	23448	21956	24065	26513	23457	20096	29217	25311	24950.9	-0.194664	0.0571297	-3.40814	0.000654071	0.0780128
ENSMUSG00000060716	Plekhh1	470	587	793	697	646	365	416	388	640	597	395	475	549.454	-0.194543	0.0653955	-2.96941	0.00298371	0.175108
ENSMUSG00000043671	Dpy19l3	4472	3439	4129	3228	3201	2887	3709	3258	3012	3271	4216	3480	3498.36	-0.193801	0.0559354	-3.46199	0.0005362	0.0678538
ENSMUSG00000038738	Shank1	33901	31077	40255	28366	27792	25814	28529	30490	29214	28272	34600	32502	30808	-0.193302	0.0546891	-3.5489	0.000386842	0.0578742
ENSMUSG00000023805	Synj2	6310	4979	5635	4558	4844	4515	4857	4703	4442	5367	6020	4941	5074.82	-0.192749	0.0563078	-3.43329	0.00059631	0.073046
ENSMUSG00000028801	Stpg1	438	243	317	318	274	348	260	321	279	184	271	236	292.576	-0.192583	0.0643113	-3.04197	0.00235033	0.152663
ENSMUSG00000019943	Atp2b1	128964	87461	107541	80093	89473	79250	99504	96841	82258	74473	107863	99121	93678.6	-0.191645	0.0570443	-3.35667	0.000788864	0.0855201
ENSMUSG00000033769	Exoc6b	9681	6733	8237	6547	6835	6197	6639	7219	6898	6235	7672	7767	7201.89	-0.19117	0.061602	-3.12736	0.00176381	0.126247
ENSMUSG00000059361	Nrsn2	2577	2330	2463	1857	1993	2405	2199	2117	1838	2009	3369	1866	2230.96	-0.190761	0.06201	-3.08386	0.00204334	0.139161
ENSMUSG00000039096	Rsad1	590	619	665	707	613	578	554	548	629	644	564	510	608.57	-0.189672	0.0669843	-2.82447	0.00473592	0.22051
ENSMUSG00000048279	Sacs	4927	4876	5943	4249	4243	3660	4120	4068	4821	4862	4927	4269	4579.35	-0.189426	0.0597132	-3.18385	0.00145328	0.116852
ENSMUSG00000034997	Htr2a	284	181	195	202	221	137	156	111	191	180	112	105	175.648	-0.189386	0.0591775	-3.33748	0.000845403	0.0866214
ENSMUSG00000047388	Atmin	3879	3027	3675	2634	3106	2766	3009	2955	2599	3204	3983	3033	3132.83	-0.18929	0.0576852	-3.28862	0.00100679	0.0962094
ENSMUSG00000049690	Nckap5	431	831	820	839	657	450	458	575	611	856	519	529	642.951	-0.189126	0.066886	-2.68033	0.00735487	0.279669
ENSMUSG00000038256	Bcl9	5394	5311	6229	4815	4488	4252	4665	4784	4814	5231	4993	5192	5020.45	-0.188932	0.0591591	-3.20991	0.00132777	0.11269
ENSMUSG00000055980	Irs1	812	933	1280	1011	1019	593	826	566	824	1124	602	772	875.449	-0.188329	0.0655437	-2.9119	0.00359242	0.187442
ENSMUSG00000031565	Fgfr1	6891	4915	5923	5419	4683	4733	6270	5717	4735	4528	5500	5105	5346.24	-0.188257	0.0588514	-3.2185	0.00128861	0.110421
ENSMUSG00000019986	Ahi1	15599	10741	11971	10875	10904	10600	12645	11821	10142	10296	16109	9844	11671.5	-0.188216	0.0533649	-3.52301	0.000426683	0.0598002
ENSMUSG00000050534	Htr5b	1170	737	934	674	657	753	933	992	601	513	731	795	785.495	-0.188193	0.0666068	-2.88865	0.00386899	0.192942
ENSMUSG00000000805	Car4	2009	1314	1472	1233	1101	1368	1243	1375	1080	1373	1944	967	1356.29	-0.188086	0.0663417	-2.84595	0.00442789	0.210463
ENSMUSG00000024008	Cpne5	2040	1822	1861	1671	1872	1513	1493	1523	1123	2125	3046	1460	1772.93	-0.187908	0.0643298	-3.0134	0.00258335	0.16372
ENSMUSG00000006800	Sulf2	2687	2864	3299	3160	2541	2159	2889	2813	2738	2577	2602	2346	2735.2	-0.187109	0.0638537	-2.91083	0.00360466	0.187442
ENSMUSG00000022623	Shank3	12832	11720	12878	10960	10146	9234	10018	10437	11399	11581	11719	11026	11171.7	-0.187072	0.0590453	-3.1963	0.00139201	0.114964
ENSMUSG00000046287	Pnma3	2043	1793	1777	1484	1723	1627	1608	1613	1426	1654	2518	1588	1724.59	-0.187021	0.0589052	-3.19049	0.00142033	0.115608
ENSMUSG00000025909	Sntg1	1175	874	1034	860	824	787	876	887	908	885	1005	752	902.626	-0.187015	0.0635788	-2.94893	0.00318874	0.180429
ENSMUSG00000039474	Wfs1	80761	67645	71671	43157	61967	57746	59571	53794	54403	56365	87135	62811	62483.8	-0.186799	0.0599346	-3.1179	0.00182147	0.128361
ENSMUSG00000055409	Nell1	7951	5360	6384	4386	5050	5063	5890	6126	5196	4049	6558	5734	5595.42	-0.186563	0.0574657	-3.24017	0.00119457	0.106935
ENSMUSG00000039989	Cbx4	1680	1273	1483	1131	1224	1167	1378	1327	1062	1197	1849	1068	1304.11	-0.186488	0.0595318	-3.13904	0.00169503	0.123258
ENSMUSG00000025776	Crispld1	365	382	417	445	330	218	244	284	296	301	403	309	334.215	-0.186394	0.0661257	-2.80658	0.00500707	0.227592
ENSMUSG00000022103	Gfra2	2624	2356	2705	2501	2337	2334	2770	2275	2140	2263	3197	2123	2457.58	-0.186386	0.0591277	-3.14594	0.00165556	0.122337
ENSMUSG00000042671	Rgs8	9559	9944	13256	9901	8890	7014	7752	8385	10496	10771	10449	9011	9628.73	-0.186194	0.059797	-3.13616	0.00171179	0.123982
ENSMUSG00000050272	Dscam	2722	2204	2498	1930	2028	1857	2154	2328	1899	2158	2463	2009	2176.44	-0.185941	0.0576774	-3.2289	0.00124265	0.108278
ENSMUSG00000029004	Kmt2e	4273	4540	5703	4408	4517	3025	4146	3697	4275	4788	4531	3852	4320.32	-0.18501	0.0635934	-2.87026	0.0041014	0.200157
ENSMUSG00000032177	Pde4a	8101	8576	9534	7778	7321	6624	6803	7582	8255	8460	7956	7825	7931.08	-0.184277	0.0598069	-3.10407	0.00190879	0.132974
ENSMUSG00000034981	Parm1	5465	4121	5216	3983	3956	4327	4418	5019	4043	4117	4695	4396	4466.21	-0.183939	0.0568992	-3.2502	0.00115324	0.105245
ENSMUSG00000015829	Tnr	6449	5180	5988	5203	5503	4308	5518	5078	4534	5510	6799	5139	5401.06	-0.18362	0.0546534	-3.35496	0.000793765	0.0855201
ENSMUSG00000074345	Tnfaip8l3	2845	3141	3729	3144	2454	2498	2621	2867	3021	3598	2302	2757	2937.32	-0.183561	0.0633453	-2.93623	0.00332233	0.183755
ENSMUSG00000040703	Cyp2s1	234	166	254	241	211	163	162	112	182	143	328	139	193.269	-0.183518	0.0639966	-2.98097	0.00287341	0.172518
ENSMUSG00000053414	Hunk	5462	3578	4073	3244	3416	3286	3720	3777	3678	2785	3987	4135	3744.8	-0.183044	0.0635282	-2.88965	0.00385665	0.192935
ENSMUSG00000028785	Hpca	334967	185460	236967	173455	195412	205021	224685	252566	188381	130693	255877	235077	215956	-0.182194	0.0636151	-2.86732	0.0041396	0.200947
ENSMUSG00000043301	Kcnj6	1487	1023	1250	917	1065	964	946	1105	1000	994	1299	1045	1085.18	-0.182082	0.0645279	-2.83461	0.00458811	0.215831
ENSMUSG00000027748	Trpc4	4357	3060	3639	3104	3178	2820	3493	3371	2880	2541	3842	3570	3302.23	-0.181489	0.0616935	-2.95311	0.00314589	0.179434
ENSMUSG00000057101	Zfp180	4402	3736	4928	3297	3366	3462	3696	3469	3519	4218	4253	3668	3817.78	-0.181319	0.0578098	-3.14708	0.0016491	0.122337
ENSMUSG00000041120	Nbl1	5748	3179	3772	3626	3382	3611	4256	4149	3412	2818	3858	3781	3780.68	-0.181187	0.0642289	-2.8092	0.00496647	0.22662
ENSMUSG00000004151	Etv1	2658	2275	2685	2086	1970	1907	2327	2281	1901	2131	2628	2211	2240.99	-0.18114	0.0561782	-3.22511	0.00125924	0.108414
ENSMUSG00000048058	Ldlrad3	600	704	834	617	464	568	540	598	599	646	560	629	615.958	-0.180764	0.0652647	-2.76182	0.00574805	0.247437
ENSMUSG00000058897	Col25a1	2021	1879	2156	2521	1943	1549	2161	1995	1590	2088	1867	1806	1973.76	-0.180725	0.0651525	-2.7577	0.00582088	0.247865
ENSMUSG00000021725	Parp8	2096	1654	1900	1679	1699	1475	1649	1707	1609	1516	2392	1569	1732.97	-0.180684	0.0592969	-3.05915	0.00221968	0.148002
ENSMUSG00000066392	Nrxn3	12721	9108	11202	8373	8861	8213	9645	8723	8932	8752	13690	8928	9645.1	-0.180509	0.0537229	-3.35999	0.000779459	0.0855201
ENSMUSG00000022528	Hes1	651	597	726	737	616	582	597	514	580	660	724	658	638.862	-0.180489	0.0656255	-2.74648	0.00602385	0.252336
ENSMUSG00000039262	Prrc2b	26987	22014	24473	19759	21652	18873	22347	21451	19404	22259	27102	21622	22199.9	-0.18038	0.0522803	-3.45137	0.000557759	0.0697275
ENSMUSG00000041654	Slc39a11	1588	1087	1390	1013	1078	1019	1283	1396	905	1027	1137	1100	1161.89	-0.179985	0.0648592	-2.80041	0.00510378	0.23001
ENSMUSG00000061911	Myt1l	19037	15488	18437	13362	15306	13355	16644	15722	13021	14147	19155	16400	15722.8	-0.179455	0.0539047	-3.33137	0.000864192	0.0871449
ENSMUSG00000037679	Inf2	6230	4477	4990	4398	4430	3785	4488	5311	4375	3099	5972	4311	4620.47	-0.179365	0.0640524	-2.82811	0.00468236	0.219134
ENSMUSG00000044501	Zfp758	315	321	492	372	302	319	368	303	307	302	359	250	334.565	-0.179152	0.0668309	-2.64785	0.00810044	0.293352
ENSMUSG00000042425	Frmpd3	1742	2049	2000	1894	1570	1587	1583	1458	1843	2105	1892	1612	1787.33	-0.178161	0.0645211	-2.75766	0.00582164	0.247865
ENSMUSG00000078580	E430018J23Rik	503	405	502	281	331	435	393	386	343	293	534	303	388.586	-0.177119	0.067075	-2.63534	0.00840529	0.297282
ENSMUSG00000035954	Dock4	16373	12112	15113	11729	12113	10650	13253	12636	12072	11411	14305	13527	12876	-0.177099	0.0573378	-3.09559	0.0019642	0.13541
ENSMUSG00000056342	Usp34	3993	3663	4286	3418	3785	2839	3833	3195	3072	3787	4238	3518	3623.36	-0.177077	0.0610305	-2.8901	0.00385124	0.192935
ENSMUSG00000020647	Ncoa1	12393	9616	11522	8449	9865	9525	10700	10486	8637	9539	11575	10535	10185.3	-0.176608	0.0538897	-3.28152	0.00103248	0.0981503
ENSMUSG00000028243	Ubxn2b	3651	3349	3738	3043	2836	2835	3380	3037	2928	3310	3861	3009	3232.26	-0.176399	0.0541837	-3.25255	0.00114376	0.105245
ENSMUSG00000037625	Cldn11	1344	1247	1790	1610	1460	1176	1531	1374	1397	1329	1250	1192	1400.42	-0.175765	0.0666424	-2.62325	0.00870961	0.300506
ENSMUSG00000022829	Stxbp5l	692	535	684	494	631	505	548	397	506	605	538	607	563.713	-0.175628	0.0670156	-2.67593	0.00745223	0.282782
ENSMUSG00000035735	Dagla	12204	9025	10971	8461	8416	7873	8852	9400	9849	8442	9484	9589	9360.71	-0.175563	0.0605206	-2.92644	0.00342865	0.184974
ENSMUSG00000047123	Ticam1	434	278	309	245	278	282	370	237	253	235	338	228	288.315	-0.175428	0.0670291	-2.63915	0.00831151	0.296132
ENSMUSG00000006586	Runx1t1	2997	3505	3874	3280	2755	2567	2823	2631	3163	3527	2716	3324	3119.57	-0.175336	0.0651249	-2.71232	0.00668146	0.266829
ENSMUSG00000017167	Cntnap1	6996	7301	8668	5722	7050	5365	6063	5569	6583	7296	9036	6093	6779.15	-0.175105	0.060923	-2.87058	0.00409717	0.200157
ENSMUSG00000042680	Garem1	2169	2187	2727	1949	2029	1326	1959	1757	2056	2084	2123	1799	2012.15	-0.175068	0.0648199	-2.66958	0.00759451	0.286395
ENSMUSG00000075028	Prdm11	2735	3665	4594	3291	3297	2555	2388	2707	3595	4261	2431	3263	3274.71	-0.174831	0.0670153	-2.67389	0.0074976	0.283913
ENSMUSG00000041468	Gpr12	1191	801	963	782	701	749	872	829	836	717	837	851	840.961	-0.174684	0.0648449	-2.69176	0.00710762	0.276018
ENSMUSG00000024598	Fbn2	392	513	649	463	504	362	331	485	480	469	340	419	457.115	-0.174534	0.0664362	-2.65487	0.00793391	0.290836
ENSMUSG00000027799	Nbea	17508	13755	15680	11474	13804	11629	14357	13082	11449	13096	16631	14842	13846.1	-0.17439	0.0574317	-3.03874	0.0023757	0.15322
ENSMUSG00000032087	Dscaml1	3708	2991	3240	2958	3121	2422	2993	3018	2824	2917	3302	2982	3036.64	-0.174043	0.0619998	-2.80949	0.00496207	0.22662
ENSMUSG00000053963	Stum	54032	38373	45795	38432	37273	33129	41866	40723	36978	38164	42819	43071	40704.3	-0.173363	0.0586004	-2.96291	0.00304744	0.176577
ENSMUSG00000025885	Myo5b	6020	4758	5556	5519	4595	4762	5874	4899	4177	5747	6651	4516	5218.78	-0.173292	0.0513383	-3.37958	0.00072596	0.0817915
ENSMUSG00000052713	Zfp608	2541	2445	3110	2377	2118	1696	2312	2358	2248	2460	2302	2190	2344.42	-0.173122	0.0619742	-2.78751	0.00531146	0.236115
ENSMUSG00000024036	Slc37a1	404	370	497	453	401	392	420	404	345	434	330	337	402.234	-0.173094	0.066861	-2.60568	0.00916913	0.308764
ENSMUSG00000058153	Sez6l	24504	17944	20308	17223	19029	17492	19827	19778	16823	17986	23159	19758	19379.4	-0.172983	0.0534055	-3.23997	0.00119543	0.106935
ENSMUSG00000103037	Pcdhgb1	344	237	224	213	206	235	238	202	180	248	209	187	227.153	-0.172863	0.0659184	-2.62509	0.00866265	0.300062
ENSMUSG00000039976	Tbc1d16	3534	3344	4314	3414	3353	2658	3184	3417	3406	3611	3119	3241	3394.53	-0.172853	0.0634058	-2.7387	0.00616833	0.253435
ENSMUSG00000025880	Smad7	1606	1532	2086	1775	1367	1299	1398	1510	1661	1780	1523	1571	1597.59	-0.1722	0.061672	-2.81061	0.00494479	0.22662
ENSMUSG00000034813	Grip1	1194	1626	1913	1745	1349	977	1261	1156	1542	1614	1258	1328	1427.92	-0.171749	0.0669128	-2.49768	0.012501	0.35232
ENSMUSG00000025422	Agap2	96357	74572	85619	69039	70044	68731	75542	82182	74173	68849	86845	78211	77195.2	-0.171489	0.0543685	-3.16865	0.0015315	0.119442
ENSMUSG00000032356	Rasgrf1	44779	43117	49649	37331	42893	35810	38293	37911	46078	40707	42137	43354	41991.8	-0.171433	0.0624206	-2.77203	0.00557082	0.243834
ENSMUSG00000056656	Apol8	1221	751	977	564	720	875	840	913	780	614	902	802	823.587	-0.171184	0.0652205	-2.59336	0.00950427	0.312247
ENSMUSG00000027002	Nckap1	41488	27482	32411	25423	26519	26753	32731	31302	25214	26055	37928	28988	29846.9	-0.170906	0.0502688	-3.38245	0.000718412	0.0814438
ENSMUSG00000021556	Golm1	2079	2132	2867	2362	1910	1492	1998	1886	2402	2238	1657	1946	2095.53	-0.170407	0.0660793	-2.60227	0.00926101	0.309016
ENSMUSG00000027217	Tspan18	1273	1513	2187	1500	1190	1225	1407	1382	1561	1491	1287	1411	1458	-0.169698	0.0640463	-2.60506	0.00918578	0.308764
ENSMUSG00000016763	Scube1	1177	999	1076	1241	992	1017	904	1060	813	1149	1633	980	1080.07	-0.169352	0.0626519	-2.74682	0.00601764	0.252336
ENSMUSG00000064127	Med14	5697	5547	6365	4968	4464	4034	4639	4620	5441	5585	5404	4956	5141.81	-0.169051	0.0603653	-2.82153	0.00477954	0.221975
ENSMUSG00000030222	Rerg	605	441	643	509	494	443	544	450	512	484	466	472	505.973	-0.169027	0.0668475	-2.55109	0.0107386	0.334866
ENSMUSG00000037999	Arap2	5691	3967	4581	3512	3747	3613	4242	3787	3516	3820	5330	4409	4141.75	-0.168771	0.0576032	-2.922	0.00347792	0.185611
ENSMUSG00000055480	Zfp458	112	138	213	148	175	117	102	54	138	160	128	81	132.668	-0.168713	0.0576659	-3.03087	0.00243851	0.156717
ENSMUSG00000034472	Rasd2	6721	4688	5485	4655	4302	4110	4530	5332	4529	4098	6056	4989	4919.69	-0.168561	0.0614188	-2.75462	0.00587595	0.248835
ENSMUSG00000053465	Hs6st3	224	213	208	184	200	120	138	172	101	145	123	185	169.689	-0.167916	0.0595305	-2.91519	0.00355474	0.187442
ENSMUSG00000050271	Prag1	1363	1395	1704	1059	1446	1357	1316	1083	1044	1598	1971	1088	1359.15	-0.167897	0.0664961	-2.52779	0.0114782	0.341763
ENSMUSG00000054640	Slc8a1	1559	1090	1484	1229	1247	817	1112	1040	1061	1091	1562	1224	1200.34	-0.16787	0.0659482	-2.53351	0.0112926	0.341036
ENSMUSG00000041649	Klf8	269	499	559	491	440	285	300	359	360	590	254	290	399.365	-0.167751	0.0640492	-2.56494	0.0103194	0.326997
ENSMUSG00000020704	Asic2	3993	3810	4054	3282	3354	3337	3306	3735	3366	3841	3983	3678	3643.95	-0.167689	0.0572799	-2.94764	0.00320207	0.180429
ENSMUSG00000028033	Kcnq5	3351	2644	3479	2344	2598	2262	2638	2256	2675	2765	3215	2859	2741.83	-0.167611	0.0615648	-2.74105	0.00612434	0.253435
ENSMUSG00000040373	Cacng5	456	386	357	600	453	311	495	296	376	431	399	252	404.852	-0.167479	0.0657419	-2.57849	0.00992335	0.318701
ENSMUSG00000053395	Cacng8	8980	6162	6999	5611	6494	5575	7291	7372	5421	5025	7657	6972	6576.9	-0.167378	0.0599337	-2.7973	0.00515316	0.231398
ENSMUSG00000059003	Grin2a	50067	37169	46096	33501	35661	32755	39592	41803	33645	31402	46645	42774	38932.4	-0.16711	0.0572456	-2.93246	0.00336291	0.183772
ENSMUSG00000030583	Sipa1l3	12274	8147	9588	7940	8286	7498	9791	9546	8146	7116	9472	9145	8858.9	-0.167064	0.0601183	-2.78049	0.00542761	0.239584
ENSMUSG00000031652	N4bp1	4957	4718	5759	4518	4446	3977	4495	4530	4732	4977	5773	4290	4748.16	-0.167063	0.0525872	-3.17456	0.00150065	0.11806
ENSMUSG00000042156	Dzip1	3518	3552	4303	3398	3087	3222	3069	3177	4115	3382	4410	3076	3521.94	-0.166991	0.0587138	-2.86039	0.00423127	0.202701
ENSMUSG00000026447	Pik3c2b	801	738	822	771	680	631	731	639	729	717	932	612	731.573	-0.166647	0.0646948	-2.57647	0.00998148	0.318701
ENSMUSG00000048251	Bcl11b	25170	17267	22875	15849	17242	16208	19479	21018	17561	15642	19936	19961	18897	-0.166486	0.0588473	-2.84066	0.00450208	0.212881
ENSMUSG00000028184	Adgrl2	3915	3018	3153	2718	2990	2537	2773	2989	2828	2874	3867	2924	3031.11	-0.166434	0.0602279	-2.77387	0.00553945	0.243043
ENSMUSG00000022346	Myc	313	290	400	298	320	306	264	269	311	332	276	286	308.043	-0.166109	0.0667211	-2.51284	0.0119765	0.348648
ENSMUSG00000041235	Chd7	1317	1861	2472	1874	1692	1306	1422	1458	2112	1939	1633	1531	1733.82	-0.165646	0.0658877	-2.42911	0.0151361	0.383675
ENSMUSG00000027967	Neurog2	78	74	73	84	52	57	51	41	41	43	45	34	57.0603	-0.165615	0.0515577	-3.23887	0.00120004	0.106935
ENSMUSG00000003418	St8sia6	231	215	332	301	256	174	203	148	255	260	171	208	232.94	-0.165189	0.0634208	-2.65597	0.00790804	0.290836
ENSMUSG00000071862	Lrrtm2	2391	1706	2203	1662	1910	1698	2107	1559	1748	2097	1893	1893	1901.6	-0.164972	0.0640431	-2.60371	0.0092221	0.309016
ENSMUSG00000055078	Gabra5	9354	6068	7669	5147	5657	6020	6769	7225	6230	5441	6874	6925	6567.29	-0.164892	0.0586997	-2.80126	0.0050903	0.229971
ENSMUSG00000068335	Dok1	324	180	251	197	235	252	264	210	186	178	269	149	223.364	-0.164388	0.065224	-2.52975	0.0114144	0.341534
ENSMUSG00000052727	Map1b	30957	30124	35644	26128	30484	23813	29879	26928	24185	31955	36332	29087	29482.4	-0.163817	0.0587888	-2.76995	0.0056065	0.244808
ENSMUSG00000045777	Ifitm10	1167	728	923	744	720	719	700	879	796	596	842	866	804.189	-0.163486	0.0669545	-2.48009	0.0131349	0.360509
ENSMUSG00000033960	Jcad	6416	4870	5200	4331	4393	3886	4942	4497	4340	4595	6267	4644	4818.91	-0.163455	0.0568947	-2.86145	0.00421704	0.202701
ENSMUSG00000055485	Soga1	882	719	945	799	827	535	751	657	833	759	753	672	762.877	-0.16306	0.0668451	-2.43547	0.0148724	0.381788
ENSMUSG00000020096	Tbata	822	679	822	617	692	602	652	784	640	510	857	688	693.79	-0.162876	0.0655899	-2.51313	0.0119667	0.348648
ENSMUSG00000026839	Upp2	885	650	881	597	652	609	657	685	635	655	796	709	696.909	-0.162445	0.0649926	-2.50885	0.0121126	0.350919
ENSMUSG00000031822	Gse1	2123	1480	1569	1448	1703	977	1626	1315	1278	1544	1348	1471	1490.07	-0.162217	0.0670605	-2.39271	0.0167245	0.401226
ENSMUSG00000030223	Ptpro	1371	1099	1123	983	1061	992	1092	907	827	1480	1391	839	1089.8	-0.161447	0.0660867	-2.4908	0.0127455	0.355727
ENSMUSG00000021549	Rasa1	2454	2236	2411	1893	1927	1720	2311	1930	1886	2095	2175	2116	2090.58	-0.161331	0.0621482	-2.60508	0.0091854	0.308764
ENSMUSG00000062785	Kcnc3	9979	9365	11356	8246	8166	7676	8415	8906	10361	8572	9283	9223	9134.4	-0.16127	0.0588855	-2.76884	0.0056257	0.24506
ENSMUSG00000043460	Elfn2	7412	6580	8092	6200	6792	5002	6059	6016	6337	7116	7162	6823	6626.55	-0.161268	0.0625397	-2.59363	0.009497	0.312247
ENSMUSG00000022791	Tnk2	10661	8362	10412	7275	8184	7971	8197	8331	8580	8539	11285	8720	8812.56	-0.161116	0.0538444	-3.0096	0.00261596	0.164002
ENSMUSG00000034570	Inpp5j	4413	2983	4011	2766	3188	2922	3228	3353	3540	2809	3856	3360	3349.17	-0.160979	0.0601415	-2.68522	0.0072483	0.27677
ENSMUSG00000049658	Bdp1	1919	1622	2209	1562	1787	1261	1778	1589	1632	1721	1786	1590	1700.5	-0.16097	0.06406	-2.50095	0.0123861	0.351355
ENSMUSG00000045659	Plekha7	1300	1288	1311	1375	1166	916	1191	1117	1261	1294	1153	1080	1210.8	-0.160881	0.0659417	-2.44085	0.0146526	0.379885
ENSMUSG00000025558	Dock9	15624	11112	13925	10707	11459	10940	12760	12684	11754	10314	14689	12570	12292.6	-0.160846	0.0544054	-2.96079	0.00306847	0.176979
ENSMUSG00000020387	Jade2	7465	6348	7656	6211	6154	5673	5954	6005	6879	6742	7680	6613	6601.62	-0.160772	0.0572093	-2.83846	0.00453313	0.213795
ENSMUSG00000034957	Cebpa	1445	1377	1758	1281	1242	1187	1355	1312	1601	1309	1288	1269	1372.45	-0.160678	0.0638732	-2.53796	0.0111501	0.340291
ENSMUSG00000028909	Ptpru	6528	4730	5455	4989	4865	4450	5031	5730	4802	4486	5620	5219	5144.17	-0.160611	0.0611972	-2.64263	0.0082265	0.295702
ENSMUSG00000034275	Igsf9b	5812	8847	9705	7685	7352	5647	5356	5672	8465	8934	7916	7473	7467.7	-0.160464	0.0658222	-2.41391	0.0157824	0.389931
ENSMUSG00000016179	Camk1g	2312	1736	1761	1579	1833	1633	1785	1322	1560	1855	2628	1745	1796.5	-0.160344	0.0634715	-2.55137	0.01073	0.334866
ENSMUSG00000052560	Cpne8	4242	3088	3745	3331	2956	2931	3581	3490	3061	2955	3877	3460	3373.47	-0.159883	0.0580329	-2.7585	0.00580675	0.247865
ENSMUSG00000036095	Dgkb	14580	10067	11901	9562	10561	10614	11532	11742	8335	11078	15691	10788	11234.2	-0.159814	0.0538165	-2.9714	0.00296443	0.174538
ENSMUSG00000102697	Pcdhac2	1195	1491	1711	1347	1458	850	1170	1049	1183	1645	1424	1167	1311.58	-0.159803	0.0669132	-2.31855	0.0204194	0.430861
ENSMUSG00000020121	Srgap1	1110	952	1414	1033	1087	1006	998	922	1217	1141	973	1116	1087.16	-0.159565	0.0660264	-2.45129	0.0142346	0.37234
ENSMUSG00000028176	Lrrc7	4018	3082	3375	2538	2996	2513	3113	2936	2612	2755	3725	3347	3060.95	-0.159544	0.0607304	-2.62747	0.00860225	0.300062
ENSMUSG00000005774	Rfx5	620	576	717	475	455	432	516	482	547	564	633	415	532.837	-0.159406	0.0659787	-2.41933	0.0155492	0.386654
ENSMUSG00000009900	Wnt3a	71	38	66	49	27	52	28	16	9	12	17	33	35.4551	-0.159387	0.0413559	-4.20025	2.6662e-05	0.0106259
ENSMUSG00000030268	Bcat1	6109	5147	5596	4686	4545	4581	5153	5381	4902	4931	5549	5130	5128.88	-0.15928	0.0553366	-2.88997	0.00385281	0.192935
ENSMUSG00000027016	Zfp385b	2153	1688	2091	1730	1798	1504	1732	1821	1663	1718	2113	1885	1818.1	-0.159198	0.0613586	-2.60737	0.00912417	0.308764
ENSMUSG00000052920	Prkg1	853	825	907	891	753	472	623	610	682	842	1101	660	763.785	-0.158678	0.0667679	-2.37707	0.0174509	0.404974
ENSMUSG00000021699	Pde4d	1366	1241	1635	1266	1307	945	1160	1183	1147	1587	1645	1057	1287.56	-0.15847	0.0619495	-2.564	0.0103474	0.327316
ENSMUSG00000038244	Mical2	25402	18302	19997	16471	16804	16407	18528	20431	17285	15669	23622	19178	18846.4	-0.158444	0.0567141	-2.79529	0.00518525	0.231964
ENSMUSG00000027478	Dnmt3b	106	134	145	145	142	115	63	90	143	100	90	99	117.526	-0.158	0.0574979	-2.88645	0.00389619	0.193769
ENSMUSG00000010797	Wnt2	1450	613	903	682	732	640	701	821	728	529	968	791	785.921	-0.157895	0.0668512	-2.25244	0.0242948	0.465786
ENSMUSG00000038065	Mturn	15919	12087	15174	11010	10843	10492	12999	12789	11671	11416	14534	13061	12566.2	-0.157261	0.053524	-2.93968	0.00328548	0.182825
ENSMUSG00000041570	Camsap2	12545	9682	11483	8519	9566	9099	11209	9926	8300	9545	13838	10127	10203.2	-0.157259	0.0490711	-3.20533	0.00134909	0.11269
ENSMUSG00000025810	Nrp1	6912	6676	8629	7484	5949	5176	6564	6621	7337	7184	5843	6698	6785.58	-0.156939	0.0628704	-2.51818	0.0117964	0.347271
ENSMUSG00000082229	Nap1l2	8003	6196	7188	5313	5512	6259	6892	6444	5077	6211	7845	6948	6434.68	-0.156936	0.0519221	-3.02527	0.00248409	0.157978
ENSMUSG00000040003	Magi2	7531	6033	7447	5766	6100	4784	6241	5919	5896	6365	6727	6360	6241.83	-0.156832	0.06062	-2.59309	0.00951179	0.312247
ENSMUSG00000050558	Prokr2	138	174	206	203	182	115	153	141	137	148	150	112	156.697	-0.156644	0.0621487	-2.43479	0.0149005	0.381972
ENSMUSG00000037014	Sstr4	799	591	639	565	487	382	491	556	566	445	554	549	550.936	-0.156601	0.0669644	-2.33376	0.0196085	0.423468
ENSMUSG00000036098	Myrf	1184	1125	1613	1327	1039	912	1048	1081	1478	1055	1238	1115	1187.68	-0.156512	0.0651205	-2.41816	0.015599	0.386838
ENSMUSG00000046138	9930021J03Rik	2552	3095	3349	2752	2534	2189	2643	2194	2895	3314	2199	2597	2715.95	-0.156343	0.0666829	-2.37074	0.0177523	0.406034
ENSMUSG00000054409	Tmem74	651	609	641	520	528	495	526	581	498	430	779	574	565.66	-0.156291	0.0660331	-2.39223	0.0167462	0.401226
ENSMUSG00000040836	Gpr161	21534	17516	22147	16918	16782	15764	18012	19477	18508	16905	16774	20357	18404.1	-0.15616	0.0616964	-2.58067	0.009861	0.31743
ENSMUSG00000039057	Myo16	915	774	870	715	740	613	796	688	623	730	1177	651	764.417	-0.156098	0.0638609	-2.45713	0.0140052	0.369396
ENSMUSG00000059602	Syn3	326	241	292	269	424	205	207	268	182	279	391	260	278.571	-0.155877	0.0657941	-2.34807	0.0188709	0.416703
ENSMUSG00000060402	Chst8	1637	887	1141	893	859	1189	1079	1287	878	822	1258	1033	1070.04	-0.155785	0.0663026	-2.31341	0.0207	0.433276
ENSMUSG00000007817	Zmiz1	6409	6470	7167	5757	5462	5411	6134	5971	5973	6850	6474	5809	6155.44	-0.155709	0.0569312	-2.73266	0.00628244	0.254251
ENSMUSG00000054027	Nt5dc3	13978	9928	11071	8237	9206	9330	11335	11045	9068	8895	12874	10023	10305.4	-0.155537	0.0501816	-3.08687	0.00202274	0.138722
ENSMUSG00000008496	Pou2f2	3145	4903	6022	4283	4226	3483	2973	3734	5259	5489	3626	4222	4335.76	-0.155533	0.066325	-2.34297	0.0191309	0.418678
ENSMUSG00000025813	Homer2	8854	8316	10260	7485	6947	6198	7505	7425	8086	7956	8439	8516	7981.6	-0.155409	0.0600595	-2.60571	0.00916832	0.308764
ENSMUSG00000059146	Ntrk3	12626	10695	12711	9299	10458	8806	10962	10468	9708	10564	13587	10707	10800.9	-0.155161	0.0533862	-2.90573	0.00366399	0.188823
ENSMUSG00000026773	Pfkfb3	2922	2338	2940	2419	2408	2080	2650	2441	2394	2374	2981	2468	2521.7	-0.154982	0.0574812	-2.69577	0.00702261	0.274468
ENSMUSG00000070808	Bicra	1581	1295	1668	1216	1223	1271	1232	1390	1435	1315	1384	1433	1370.29	-0.154798	0.0625308	-2.51637	0.0118569	0.347685
ENSMUSG00000044647	Csrnp3	4757	3690	4380	3281	3714	3546	4038	3875	3592	3645	4883	3895	3912.76	-0.154793	0.0528077	-2.93268	0.00336055	0.183772
ENSMUSG00000032666	1700025G04Rik	4125	4586	5602	4451	3938	3645	3985	3854	3853	5610	5282	4160	4413.74	-0.154772	0.0598078	-2.5715	0.0101258	0.32198
ENSMUSG00000027347	Rasgrp1	50956	33902	39899	31838	31974	32585	38051	40209	34502	29377	42893	38321	36736.9	-0.154649	0.0574245	-2.68811	0.00718587	0.27677
ENSMUSG00000029475	Kdm2b	900	807	905	839	920	642	816	730	771	907	933	749	827.275	-0.154599	0.0658023	-2.33351	0.0196213	0.423468
ENSMUSG00000042505	Sdhaf3	561	396	481	460	378	346	457	452	349	403	476	382	425.972	-0.154481	0.0666794	-2.30804	0.020997	0.434074
ENSMUSG00000029189	Sel1l3	2845	2841	3535	2631	2250	2459	2439	2845	2915	2715	3160	2765	2777.63	-0.154426	0.0541005	-2.87176	0.0040819	0.200157
ENSMUSG00000022861	Dgkg	9625	7089	8418	7230	7282	6142	8590	8160	6644	6631	8131	7867	7611.84	-0.15436	0.0601579	-2.57638	0.00998411	0.318701
ENSMUSG00000027204	Fbn1	1007	1147	1455	1344	1307	906	1198	865	1261	1312	1058	1066	1172.2	-0.154223	0.0670721	-2.26076	0.0237743	0.462118
ENSMUSG00000029167	Ppargc1a	2511	2767	3494	2622	2425	2096	2631	2158	2611	3060	2493	2655	2634.23	-0.154095	0.0650456	-2.36424	0.018067	0.411171
ENSMUSG00000021730	Hcn1	4031	3366	3916	3008	3264	3017	3686	3547	3052	3317	4005	3424	3450.17	-0.153902	0.054888	-2.80545	0.00502457	0.227592
ENSMUSG00000026826	Nr4a2	3713	3057	3718	2268	2666	3018	2881	3028	2762	2539	4585	3013	3064.51	-0.153897	0.0583153	-2.6586	0.00784658	0.290836
ENSMUSG00000071281	Zfp65	542	393	448	407	349	464	452	420	364	446	422	399	425.218	-0.153706	0.0666441	-2.30459	0.0211896	0.435043
ENSMUSG00000018476	Kdm6b	4317	5507	6799	5466	5364	3786	4079	4146	6184	6051	4790	5111	5183.8	-0.153653	0.0662007	-2.31431	0.0206506	0.432904
ENSMUSG00000022602	Arc	14160	9297	13736	11749	9830	8271	8030	10418	12341	9233	13197	11607	10948.8	-0.153593	0.0659231	-2.42145	0.0154587	0.386581
ENSMUSG00000042851	Zc3h6	760	774	973	810	636	571	681	568	701	867	746	778	739.975	-0.153506	0.0667043	-2.32065	0.0203055	0.430448
ENSMUSG00000025959	Klf7	551	671	928	728	652	541	596	513	647	803	596	681	664.219	-0.153474	0.0670747	-2.25792	0.0239506	0.463682
ENSMUSG00000069729	Arid1b	6624	4673	5810	4615	4905	4653	5376	5244	4738	4935	6551	5180	5232.11	-0.153371	0.052936	-2.89581	0.00378184	0.192811
ENSMUSG00000040675	Mthfd1l	1229	903	902	771	822	922	1010	889	815	771	1193	884	918.301	-0.153347	0.0627962	-2.43148	0.0150372	0.382504
ENSMUSG00000060950	Trmt61a	1576	1019	1343	911	1174	1106	1304	1130	997	1076	1584	1099	1179.04	-0.153314	0.0604082	-2.52254	0.0116511	0.345782
ENSMUSG00000001741	Il16	462	470	631	568	518	472	498	543	589	406	435	395	504.371	-0.153281	0.0664679	-2.32542	0.0200495	0.427113
ENSMUSG00000024074	Crim1	13587	10196	13752	8979	9593	10030	12718	11335	9067	9040	13877	11725	11028	-0.153195	0.0537817	-2.8557	0.00429416	0.205175
ENSMUSG00000037992	Rara	2152	1463	1719	1301	1452	1232	1395	1888	1503	1258	1400	1483	1517.5	-0.153171	0.0665157	-2.34819	0.0188651	0.416703
ENSMUSG00000028854	Slc9a1	3223	2733	3377	2861	2669	2549	2882	3061	2793	2985	3317	2732	2923.1	-0.153138	0.0552743	-2.77593	0.00550442	0.242088
ENSMUSG00000033615	Cplx1	14027	13732	16327	11844	11960	11809	12663	12783	12708	14093	16514	13130	13401.4	-0.153087	0.0516535	-2.9641	0.00303566	0.176577
ENSMUSG00000004233	Wars2	415	356	473	474	334	283	372	272	320	483	464	325	379.59	-0.152925	0.0670393	-2.28802	0.0221366	0.444485
ENSMUSG00000063873	Slc24a3	26129	17185	20937	16467	16941	16880	20548	21389	17687	15226	20735	19960	19038.1	-0.152811	0.0584835	-2.6163	0.00888875	0.305532
ENSMUSG00000017692	Rhbdl3	2396	1818	2535	1926	1947	2008	2202	2133	1885	2319	2178	1966	2103.84	-0.15275	0.0609352	-2.51549	0.0118867	0.347685
ENSMUSG00000035561	Aldh1b1	1660	1007	1043	936	1036	1002	1068	1370	959	719	1264	1073	1087.15	-0.152629	0.0667832	-2.29832	0.0215434	0.439832
ENSMUSG00000027014	Cwc22	1006	820	927	721	812	705	882	850	722	689	1107	788	828.275	-0.152189	0.0623321	-2.44342	0.0145487	0.378266
ENSMUSG00000053553	3110082I17Rik	1073	760	1090	768	759	806	918	943	759	792	994	812	866.142	-0.152103	0.0632982	-2.40383	0.0162241	0.395358
ENSMUSG00000005107	Slc2a9	415	275	366	257	304	247	274	254	346	242	383	233	297.762	-0.152097	0.0668495	-2.29592	0.0216807	0.441647
ENSMUSG00000002409	Dyrk1b	797	599	678	585	640	591	678	590	626	652	625	584	637.698	-0.151783	0.0666027	-2.29689	0.0216251	0.441007
ENSMUSG00000030093	Wnt7a	1107	1161	1012	977	792	1097	1155	1149	888	915	1051	980	1024.61	-0.151635	0.0635291	-2.37159	0.0177117	0.406034
ENSMUSG00000021534	1700001L19Rik	1126	839	1145	853	861	945	1049	950	712	957	1262	876	954.781	-0.151601	0.0634522	-2.39245	0.0167362	0.401226
ENSMUSG00000028433	Ubap2	1924	2148	2971	2376	2349	1772	2086	1918	2341	2743	2309	2029	2257.07	-0.151565	0.0644519	-2.29305	0.0218452	0.442529
ENSMUSG00000037138	Aff3	3916	3039	3375	2698	2723	2531	2944	3069	2635	3022	3181	3392	3031.54	-0.151409	0.0619401	-2.46642	0.013647	0.3668
ENSMUSG00000074892	B3galt5	3848	3715	4717	3701	3352	3070	3834	3543	3841	3993	3199	3799	3729.95	-0.151179	0.0635889	-2.40623	0.016118	0.394266
ENSMUSG00000048897	Zfp710	2247	2437	2796	2133	2044	1955	1768	2174	2415	2461	2319	2456	2275.46	-0.150998	0.0628777	-2.46794	0.0135893	0.366369
ENSMUSG00000031027	Stk33	323	258	249	292	251	324	396	270	149	224	308	172	267.387	-0.150964	0.0640726	-2.50104	0.0123829	0.351355
ENSMUSG00000063659	Zbtb18	41026	28969	34154	23215	25942	27303	33593	33542	26291	25840	33956	31152	30122.3	-0.150661	0.0515717	-2.91346	0.00357452	0.187442
ENSMUSG00000006362	Cbfa2t3	3488	3740	4446	3281	3143	2936	2923	3114	4232	3556	3756	3526	3520.68	-0.150436	0.0620595	-2.46386	0.013745	0.367311
ENSMUSG00000072494	Ppp1r3e	491	585	680	567	573	555	471	509	606	667	471	543	567.021	-0.15035	0.0670443	-2.25514	0.0241244	0.464961
ENSMUSG00000049092	Gpr137c	697	623	799	699	585	492	620	491	676	691	788	564	641.8	-0.150292	0.0658183	-2.29193	0.0219099	0.443288
ENSMUSG00000041245	Wnk3	1850	2036	2324	1665	1606	1609	1618	1741	1803	2081	1807	1975	1847.07	-0.150206	0.0634516	-2.39191	0.0167607	0.401226
ENSMUSG00000056592	Zfp658	444	280	445	337	317	360	392	302	294	321	482	313	353.512	-0.150016	0.0669956	-2.23417	0.0254721	0.478563
ENSMUSG00000035566	Pcdh17	3589	3455	4277	3105	3279	2866	3798	3367	3045	3763	3941	3006	3440.67	-0.149615	0.0590519	-2.52358	0.0116168	0.345325
ENSMUSG00000021065	Fut8	4445	3877	4694	3540	3132	3444	3985	3762	3967	3919	4007	3903	3878.41	-0.149226	0.0547127	-2.73784	0.00618437	0.253435
ENSMUSG00000029869	Ephb6	4578	3265	3851	2606	2959	3057	3791	3503	3156	2797	4553	3063	3385.94	-0.149093	0.0534063	-2.78009	0.00543436	0.239584
ENSMUSG00000026883	Dab2ip	7013	5390	6260	5299	5108	4822	5818	5711	5417	5254	6549	5829	5675.43	-0.148913	0.055934	-2.66834	0.0076227	0.286865
ENSMUSG00000036617	Etl4	5058	4255	5250	3712	3654	3520	4761	4253	3537	4125	5864	3681	4248.15	-0.14888	0.0549795	-2.70941	0.0067403	0.266829
ENSMUSG00000049303	Syt12	3164	1885	2306	1797	1922	1923	2166	2346	1991	1515	2622	2281	2138.27	-0.14879	0.0640709	-2.31173	0.0207925	0.433721
ENSMUSG00000022797	Tfrc	4957	3030	4215	3446	3426	3012	4460	3703	2908	3074	4946	3496	3668.97	-0.14861	0.0585882	-2.53121	0.0113669	0.341036
ENSMUSG00000025969	Nrp2	4212	4641	5807	4659	4128	3300	4312	4188	4550	5562	4106	3969	4466.76	-0.148557	0.0631643	-2.33944	0.0193127	0.420138
ENSMUSG00000027375	Mal	3105	2522	3691	3209	2701	2154	3297	3175	2702	2342	3303	2435	2871.28	-0.148471	0.0644641	-2.29961	0.0214703	0.438832
ENSMUSG00000046185	Zfp84	1151	975	1202	916	917	901	1189	951	882	979	1090	991	1007.33	-0.14825	0.0629293	-2.36947	0.0178135	0.406924
ENSMUSG00000021684	Pde8b	3531	2451	2824	2272	2519	2313	2795	2587	2097	2612	3673	2616	2657.67	-0.148197	0.0561245	-2.6334	0.00845348	0.297289
ENSMUSG00000043602	Zfp3	1419	932	1233	864	874	1046	1083	1134	930	842	1272	1110	1051.53	-0.148002	0.0625962	-2.35858	0.0183449	0.414908
ENSMUSG00000039087	Rreb1	1213	1334	1663	1236	1335	1148	1303	1066	1574	1361	1597	1032	1322.71	-0.147999	0.065237	-2.25108	0.0243805	0.46645
ENSMUSG00000034610	Tut4	1194	1085	1490	1196	1005	1020	1261	1053	1262	1331	915	1025	1158.47	-0.147698	0.0660036	-2.29421	0.0217782	0.441663
ENSMUSG00000056752	Dnah9	2221	1684	1951	1480	1593	1352	2019	1614	1585	1279	2008	1810	1701.76	-0.147671	0.0631114	-2.355	0.0185227	0.416697
ENSMUSG00000043635	Adamts3	707	891	1023	836	804	514	666	653	738	950	882	711	782.976	-0.147648	0.0668879	-2.15087	0.0314866	0.521975
ENSMUSG00000090291	Lrrc10b	4785	4009	4655	4074	3417	2983	3229	4083	4357	3489	3378	4570	3935.64	-0.147644	0.0664765	-2.33679	0.0194501	0.421619
ENSMUSG00000015396	Cd83	1255	881	881	785	790	1098	1028	1025	792	809	1062	954	942.76	-0.147532	0.0637836	-2.29039	0.0219989	0.444164
ENSMUSG00000026238	Ptma	590	332	478	359	384	375	440	390	354	389	503	354	408.02	-0.147419	0.0667555	-2.1768	0.0294958	0.509805
ENSMUSG00000061731	Ext1	4075	2994	3637	2789	2800	2971	3290	3197	2945	2972	4299	3137	3225.33	-0.147412	0.0538811	-2.73638	0.00621192	0.253435
ENSMUSG00000025932	Eya1	694	522	720	521	480	431	730	512	453	609	595	392	549.282	-0.147273	0.0664081	-2.27998	0.0226089	0.44979
ENSMUSG00000028698	Pik3r3	2442	2008	2290	1811	1882	1745	2403	1720	1979	1929	2487	1890	2034.14	-0.147218	0.0598372	-2.476	0.0132862	0.362482
ENSMUSG00000037428	Vgf	12026	7693	8653	7135	9626	8878	8891	9339	7462	7917	12990	9006	9041.29	-0.147092	0.0567244	-2.58168	0.009832	0.31743
ENSMUSG00000091712	Sec14l5	78	100	185	141	109	56	82	65	101	117	59	52	97.163	-0.147029	0.0550649	-2.62504	0.00866387	0.300062
ENSMUSG00000037984	Neurod6	21928	15025	17515	13848	14221	14000	17164	17925	14327	12947	18191	17647	16099	-0.14686	0.0580246	-2.53479	0.0112514	0.340565
ENSMUSG00000039824	Myl6b	544	460	528	333	378	416	491	492	339	364	497	416	434.589	-0.146745	0.0663917	-2.21433	0.0268058	0.486826
ENSMUSG00000020524	Gria1	112534	74199	86969	70602	73934	70982	88149	93802	72234	63512	96452	84925	81601.9	-0.146447	0.0580918	-2.51944	0.0117541	0.346841
ENSMUSG00000059898	Dsc3	139	274	320	124	235	292	208	153	115	183	253	150	205.343	-0.146372	0.056802	-2.37728	0.0174411	0.404974
ENSMUSG00000027858	Tspan2	1742	1775	2449	2173	1716	1374	1970	1751	2236	1775	1783	1538	1864.07	-0.145627	0.0654716	-2.20605	0.0273805	0.493336
ENSMUSG00000039358	Drd5	1676	973	1312	871	825	1181	1039	1429	1002	784	1039	1300	1112.99	-0.145616	0.0665851	-2.21958	0.0264476	0.485245
ENSMUSG00000054074	Skida1	1298	1454	1528	1280	1050	937	1150	1215	1452	1272	1042	1211	1248.44	-0.145446	0.0662434	-2.23043	0.0257191	0.478563
ENSMUSG00000043467	Zbtb37	962	1395	1856	1516	1209	870	1197	982	1337	1564	1040	1209	1273.91	-0.145405	0.0670259	-2.08103	0.037431	0.562076
ENSMUSG00000054733	Msra	5105	3203	4767	3360	3168	3816	3999	4283	3900	3034	4337	4047	3889.56	-0.145304	0.0601512	-2.42018	0.0155126	0.386654
ENSMUSG00000033618	Map3k13	1345	1236	1585	1155	1123	923	1125	933	1188	1459	1244	1247	1212.61	-0.145258	0.0662848	-2.23039	0.0257216	0.478563
ENSMUSG00000067081	Asb18	165	192	245	169	148	127	156	104	168	150	114	155	159.5	-0.145014	0.0606091	-2.45452	0.0141074	0.37102
ENSMUSG00000061462	Obscn	320	430	416	301	357	292	323	260	322	345	349	334	339.632	-0.145009	0.0659211	-2.16152	0.0306549	0.519189
ENSMUSG00000079157	Fam155a	5988	4722	6081	4264	4202	4514	4825	5219	4452	4809	6310	5008	4986.29	-0.144984	0.0532515	-2.73329	0.00627055	0.254251
ENSMUSG00000027200	Sema6d	3408	3713	4742	3873	3168	2839	3770	3398	3758	4238	3272	3341	3637.51	-0.144824	0.0628699	-2.29156	0.0219313	0.443288
ENSMUSG00000032193	Ldlr	1364	1669	1753	1673	1222	1208	1672	1528	1372	1608	1426	1268	1483.83	-0.1446	0.0643427	-2.21304	0.026895	0.487476
ENSMUSG00000045441	Gprin3	214	182	230	225	213	164	212	142	157	219	237	162	196.324	-0.144508	0.0656054	-2.20968	0.0271273	0.49054
ENSMUSG00000022321	Cdh10	1851	1442	1483	1326	1215	1284	1555	1482	1305	1198	1834	1390	1434.66	-0.144344	0.0606572	-2.37619	0.0174922	0.404974
ENSMUSG00000043964	Orai3	3098	2179	2651	2285	1885	1954	2389	2488	2318	1919	2578	2394	2330.35	-0.144312	0.0622268	-2.32121	0.0202757	0.430315
ENSMUSG00000035901	Dennd5a	14307	11038	13911	10205	10261	9892	12842	11694	10791	11293	14790	10877	11702.4	-0.144257	0.0467149	-3.08591	0.0020293	0.138722
ENSMUSG00000020590	Snx13	4208	3172	4009	3053	3092	2686	3715	3286	2998	3586	4374	2933	3387.47	-0.144141	0.0527777	-2.72742	0.00638313	0.257185
ENSMUSG00000050248	Evc2	3464	2176	2433	2055	2210	2526	2462	2622	1991	1973	3642	2526	2473.71	-0.144098	0.0613865	-2.34108	0.019228	0.419743
ENSMUSG00000042529	Kcnj12	275	234	255	208	264	225	246	183	202	230	306	206	235.564	-0.143879	0.0664676	-2.1682	0.0301438	0.516456
ENSMUSG00000024127	Prepl	16349	12967	14283	11308	13601	11253	14835	11998	11656	13789	17490	12847	13413.2	-0.143354	0.0543767	-2.63406	0.00843699	0.297282
ENSMUSG00000034701	Neurod1	1377	1492	1828	1556	1224	1096	1170	1093	1737	1902	1043	1357	1421.12	-0.143211	0.0670282	-2.26139	0.0237351	0.462118
ENSMUSG00000025314	Ptprj	6337	5300	6876	5265	4899	4539	5869	5362	5206	5598	6262	5722	5571.63	-0.143049	0.0553335	-2.58831	0.00964492	0.314918
ENSMUSG00000047419	Cmya5	522	407	465	290	367	396	376	325	458	336	365	418	394.693	-0.143002	0.0668471	-2.18805	0.0286663	0.504549
ENSMUSG00000021852	Slc35f4	627	449	514	312	334	430	509	471	356	310	601	335	430.076	-0.142766	0.0670417	-2.12617	0.033489	0.539966
ENSMUSG00000057337	Chst3	151	175	117	124	125	107	128	153	73	94	116	116	123.986	-0.142645	0.0615608	-2.34421	0.0190677	0.417835
ENSMUSG00000034765	Dusp5	2297	1759	2169	1981	1732	1552	1654	2091	2084	1550	1993	1959	1902.38	-0.142497	0.0658265	-2.22518	0.0260694	0.481417
ENSMUSG00000024533	Spire1	6706	5426	6255	4922	4784	4927	5910	5549	5413	5616	6562	5094	5559.36	-0.142399	0.0515504	-2.76422	0.00570584	0.246784
ENSMUSG00000040128	Pnrc1	1318	972	1103	901	938	1074	1233	1152	910	1014	999	994	1048.31	-0.142349	0.0644544	-2.23434	0.0254607	0.478563
ENSMUSG00000009406	Elk1	5288	4565	5481	4133	4070	3931	4492	4591	4582	4933	4357	4810	4601.12	-0.142043	0.0608455	-2.36865	0.0178531	0.407319
ENSMUSG00000054008	Ndst1	6137	6152	7740	6525	5451	4511	6350	5470	6049	6922	6195	5895	6114.31	-0.14187	0.0611215	-2.30794	0.0210026	0.434074
ENSMUSG00000039546	Ajap1	2444	1818	2335	1682	1780	1740	1802	1919	1910	1854	2415	2086	1968.52	-0.14185	0.0600083	-2.38803	0.0169387	0.403611
ENSMUSG00000041180	Hectd2	965	1147	1424	1212	824	585	764	746	1386	1173	842	879	1004.52	-0.141662	0.067029	-2.16129	0.0306726	0.519189
ENSMUSG00000016526	Dyrk3	1960	1180	1462	1249	1103	1410	1470	1561	1294	979	1603	1412	1379.35	-0.14166	0.0652022	-2.16693	0.0302403	0.516456
ENSMUSG00000011256	Adam19	1189	1658	1866	1825	1304	1000	1104	1322	1511	1953	1495	1388	1478.05	-0.141494	0.0651983	-2.13574	0.0327005	0.533378
ENSMUSG00000013663	Pten	8024	7450	9708	6730	6994	6426	8390	6476	6475	8384	8988	7614	7588.46	-0.14148	0.0601442	-2.35193	0.0186764	0.416697
ENSMUSG00000024112	Cacna1h	3654	2915	3274	2442	2725	2600	2730	3025	3137	2510	4097	2602	2949.53	-0.14147	0.0596169	-2.39997	0.0163962	0.397919
ENSMUSG00000050600	Zfp831	4687	4221	5250	3502	3989	3997	3928	4300	4229	4518	4637	4505	4306.35	-0.141355	0.0590181	-2.41965	0.0155353	0.386654
ENSMUSG00000048385	Scrt1	5176	5845	7638	5202	5247	4390	4700	4813	6475	6082	5328	5994	5598.88	-0.141313	0.064314	-2.22454	0.0261124	0.481417
ENSMUSG00000029765	Plxna4	16397	14099	17986	12779	13006	12248	14244	15360	14482	13290	16859	14985	14565.3	-0.141254	0.0524539	-2.70528	0.0068247	0.268249
ENSMUSG00000047842	Diras2	11539	9466	10908	7706	8355	7833	9845	8958	8828	8643	12135	9285	9363.92	-0.141164	0.0525123	-2.68623	0.00722642	0.27677
ENSMUSG00000058402	Zfp420	1139	1071	1482	1162	1146	1058	1180	1026	1185	1306	1390	1098	1185.21	-0.141102	0.0619137	-2.25661	0.0240326	0.463682
ENSMUSG00000023965	Fbxl17	3547	2127	2587	2083	2328	2417	2843	2564	2082	2247	3197	2566	2520.25	-0.140979	0.0567056	-2.46009	0.0138903	0.369033
ENSMUSG00000037111	Setd7	11428	12969	16636	13014	11557	9095	12585	11034	12253	14633	12196	12127	12479.9	-0.140965	0.063348	-2.18716	0.0287305	0.505192
ENSMUSG00000039706	Ldb2	2555	2479	2767	2187	2199	2151	2730	2402	1667	2765	3105	2132	2407.1	-0.140931	0.0621409	-2.27554	0.0228736	0.452496
ENSMUSG00000039117	Taf4	1216	1081	1283	1197	949	1013	988	1104	1272	1142	1206	1069	1128.75	-0.140863	0.0636032	-2.24892	0.0245177	0.467501
ENSMUSG00000028289	Epha7	24122	19089	23936	17371	17939	15220	19624	19048	21431	17725	20397	20601	19641	-0.140623	0.0604916	-2.34534	0.0190099	0.417835
ENSMUSG00000016477	E2f3	4581	4303	4930	3918	3703	3327	3778	3923	4398	4452	4049	4338	4146.68	-0.140487	0.0624819	-2.28803	0.0221358	0.444485
ENSMUSG00000061589	Dot1l	3098	4236	5024	4039	3518	2810	3183	2961	4704	4574	3508	3557	3800.26	-0.140463	0.0661301	-2.10017	0.0357142	0.553828
ENSMUSG00000027520	Zdbf2	1119	1062	1251	1152	1256	990	1416	956	880	1164	1463	1049	1141.68	-0.140073	0.0655282	-2.13236	0.0329769	0.535305
ENSMUSG00000067780	Pi15	68	173	158	167	118	118	131	77	83	116	61	71	115.215	-0.139941	0.0508898	-2.76257	0.00573475	0.247437
ENSMUSG00000055024	Ep300	2915	2430	2980	2234	2277	1940	2345	2158	2530	2705	2739	2439	2465.2	-0.139767	0.0620989	-2.27053	0.0231756	0.456804
ENSMUSG00000059203	Il1rapl2	267	304	267	189	273	265	242	280	209	213	283	252	254.46	-0.139687	0.0666882	-2.06548	0.0388776	0.568585
ENSMUSG00000004451	Ralb	1827	1382	1597	1153	1243	1440	1530	1522	1274	1385	1390	1612	1442.18	-0.139626	0.0622296	-2.2648	0.0235248	0.460208
ENSMUSG00000044352	Sowaha	18205	14943	17580	15387	12333	13042	14216	14875	15928	16465	16387	15869	15400	-0.139452	0.0561307	-2.51255	0.0119862	0.348648
ENSMUSG00000059149	Mfsd4a	1861	1506	1650	1349	1369	1308	1684	1549	1388	1377	1751	1514	1515.97	-0.139425	0.0590696	-2.36258	0.0181481	0.412502
ENSMUSG00000038371	Sbf2	3250	2735	3076	2718	2502	2390	2991	2715	2587	2929	3259	2746	2811.03	-0.139416	0.0553316	-2.52128	0.0116927	0.346454
ENSMUSG00000036712	Cyld	23210	17226	21346	15930	18050	16711	19062	19596	15699	17681	25580	19773	18951.8	-0.13934	0.0516692	-2.70431	0.00684459	0.268249
ENSMUSG00000032875	Arhgef17	16640	12023	14793	11184	11424	11127	13376	12808	12491	12004	15788	13217	12959.5	-0.139299	0.0524722	-2.65323	0.00797254	0.290836
ENSMUSG00000103332	Pcdhga2	663	472	437	398	529	366	384	347	384	514	507	496	458.079	-0.139299	0.0659914	-2.13322	0.0329067	0.535305
ENSMUSG00000045671	Spred2	5945	4883	6448	4369	4778	4360	5419	5170	4660	5081	5846	5368	5160.3	-0.139242	0.0566719	-2.46066	0.0138681	0.36898
ENSMUSG00000027109	Sp3	2438	2080	2524	2166	1933	1835	2340	2182	2071	2274	2614	1953	2188.09	-0.139205	0.0547502	-2.54091	0.0110565	0.340291
ENSMUSG00000026322	Htr4	692	873	1097	813	700	558	651	605	942	890	645	767	776.171	-0.13911	0.0670533	-2.10163	0.0355855	0.55286
ENSMUSG00000018143	Mafk	1813	1178	1402	1103	1122	1302	1417	1300	1155	1212	1522	1445	1320.36	-0.13891	0.0601443	-2.29547	0.0217063	0.441663
ENSMUSG00000047749	Zc3hav1l	1371	1650	2184	1656	1427	1023	1282	1349	1861	1842	1172	1451	1536.35	-0.138845	0.0669972	-2.10294	0.0354707	0.552568
ENSMUSG00000049313	Sorl1	31335	22105	25517	20477	22085	20008	25135	25965	22078	20436	26519	24786	23711.8	-0.138808	0.0576509	-2.4097	0.0159654	0.392724
ENSMUSG00000003810	Mast2	5388	4756	5409	4269	4229	3647	4758	4448	4391	4852	5723	4411	4657.36	-0.138775	0.0551908	-2.51226	0.011996	0.348648
ENSMUSG00000028804	Csmd2	2195	1978	2371	1980	1903	1747	1810	1792	1943	2360	2709	1982	2053.4	-0.138655	0.0589147	-2.38365	0.017142	0.404974
ENSMUSG00000031608	Galnt7	654	847	1062	989	757	539	670	633	939	971	577	753	793.625	-0.138519	0.0667119	-2.08553	0.0370211	0.562076
ENSMUSG00000035284	Vps13c	6424	5082	6613	4525	4875	4340	5776	5112	5008	5126	6394	5363	5339.43	-0.138442	0.0545291	-2.53737	0.0111689	0.340291
ENSMUSG00000020331	Hcn2	3605	3072	3613	2670	2699	2650	2736	3039	3191	3128	3677	2983	3073.51	-0.138232	0.058364	-2.39958	0.0164141	0.397919
ENSMUSG00000051951	Xkr4	478	592	850	681	517	295	466	374	458	687	466	564	539.008	-0.138154	0.0646581	-2.09098	0.0365298	0.560977
ENSMUSG00000024548	Setbp1	4933	6403	7689	5623	5218	4106	4747	4737	6144	7104	4820	5850	5654.77	-0.138135	0.0663424	-2.09481	0.0361878	0.55786
ENSMUSG00000034402	Kcnh5	184	122	192	119	149	125	148	124	88	136	108	124	135.05	-0.138089	0.0599764	-2.35015	0.0187656	0.416703
ENSMUSG00000095440	Fignl2	255	375	360	340	300	329	291	187	346	403	239	256	312.512	-0.138034	0.0625689	-2.26822	0.0233157	0.457617
ENSMUSG00000000628	Hk2	516	405	397	319	417	338	424	344	338	397	441	358	389.771	-0.137918	0.0670736	-2.0464	0.0407169	0.582741
ENSMUSG00000028434	Epb41l4b	1988	1954	2283	1982	2080	1941	1768	1671	1895	2739	2547	2000	2070.91	-0.137873	0.0628301	-2.21787	0.0265638	0.485814
ENSMUSG00000071719	Tmem28	4484	5335	6969	4882	4363	3830	4314	4686	5780	6186	4014	4786	5000.94	-0.137814	0.0649188	-2.15345	0.0312834	0.520497
ENSMUSG00000055026	Gabrg3	1473	1409	1623	1491	1465	1304	1461	1650	1224	1542	1821	1376	1482.22	-0.137618	0.0598508	-2.28476	0.0223268	0.447143
ENSMUSG00000030084	Plxna1	11053	7800	9356	7431	7727	7036	8608	8568	8384	7372	9478	9005	8434.06	-0.137331	0.0591788	-2.32679	0.0199766	0.427113
ENSMUSG00000059248	Sept9	15123	11896	13191	10393	10751	11579	13756	13342	11632	11147	13314	12401	12314.6	-0.137308	0.0527721	-2.61057	0.00903912	0.308764
ENSMUSG00000025318	Jph3	20169	14547	16761	12699	13823	13769	15149	16076	15418	13697	17499	16147	15388.5	-0.137225	0.0573464	-2.40175	0.016317	0.39709
ENSMUSG00000058093	Zfp729b	363	262	315	216	238	276	276	282	233	247	318	232	269.607	-0.137225	0.0669477	-2.04004	0.0413468	0.583134
ENSMUSG00000000787	Ddx3x	20176	19699	24876	20773	19692	15655	20844	18151	18850	24449	22518	19442	20390.3	-0.137198	0.0590528	-2.3051	0.0211609	0.434941
ENSMUSG00000045519	Zfp560	476	402	548	384	396	329	397	436	328	486	434	365	413.39	-0.137079	0.0670723	-2.06	0.0393986	0.570159
ENSMUSG00000045515	Pou3f3	12582	8612	10089	7318	7826	8693	9900	10940	8614	7104	10127	9900	9236.1	-0.137032	0.0575847	-2.38719	0.0169777	0.403709
ENSMUSG00000025738	Fbxl16	52527	36782	43429	32305	34504	35002	37307	42868	36906	35244	50317	38915	39279.8	-0.136985	0.0559668	-2.45193	0.0142092	0.37234
ENSMUSG00000021448	Shc3	578	684	886	789	783	412	678	432	489	827	950	600	672.992	-0.136866	0.066671	-1.98391	0.0472659	0.608096
ENSMUSG00000025876	Unc5a	7760	6862	7790	6140	6506	6406	6635	7381	7268	7096	7258	6911	7001.72	-0.136792	0.0589001	-2.34679	0.0189359	0.417412
ENSMUSG00000031230	Fgf16	326	134	186	128	149	209	184	205	98	93	231	155	171.929	-0.136724	0.0611214	-2.223	0.0262161	0.482354
ENSMUSG00000021557	Agtpbp1	14426	11239	13190	9650	10597	10605	12827	11846	9964	10627	16607	11541	11773.5	-0.136592	0.0482308	-2.8331	0.00460984	0.216295
ENSMUSG00000033697	Arhgap39	10820	8077	9421	8001	7957	7223	8841	8878	9027	7764	8550	9124	8627.41	-0.136172	0.0619794	-2.2246	0.0261082	0.481417
ENSMUSG00000042604	Kcna4	3932	3573	4296	2958	2998	3003	3702	3660	2697	3265	4749	3477	3483.66	-0.135324	0.0581147	-2.32959	0.0198281	0.425767
ENSMUSG00000031530	Dusp4	2202	1873	2194	1652	1768	1328	1806	1658	1799	1868	2247	1774	1834.99	-0.135282	0.0625699	-2.15696	0.0310089	0.519358
ENSMUSG00000032487	Ptgs2	712	736	991	861	723	534	599	689	867	838	857	688	759.53	-0.135222	0.0655695	-2.07451	0.0380315	0.565897
ENSMUSG00000028496	Mllt3	4122	4121	5193	4203	3559	3340	4074	3654	4275	4591	4263	4228	4135.17	-0.135221	0.059984	-2.25405	0.0241927	0.465087
ENSMUSG00000033054	Npat	803	885	943	845	842	663	857	734	841	916	889	728	830.996	-0.135171	0.0662897	-2.01216	0.0442027	0.598063
ENSMUSG00000071176	Arhgef10	910	812	1201	1050	800	700	979	805	1084	874	1093	669	911.915	-0.135168	0.0651128	-2.07486	0.0379992	0.565897
ENSMUSG00000037605	Adgrl3	3252	2712	2709	2406	2578	2060	2885	2291	2119	2727	3455	2716	2635.88	-0.135129	0.0611409	-2.20943	0.0271447	0.49054
ENSMUSG00000028636	Ppcs	259	186	277	213	161	238	225	199	203	176	253	173	212.583	-0.135011	0.0656822	-2.03507	0.0418436	0.58529
ENSMUSG00000022361	Zhx1	7213	5509	6680	4944	5342	5156	6271	6069	5154	5682	6930	6064	5870.7	-0.134772	0.0531593	-2.53738	0.0111686	0.340291
ENSMUSG00000033152	Podxl2	4622	3467	4379	3016	3584	3644	3879	3731	3541	3339	5195	4062	3833.42	-0.134732	0.0520117	-2.59715	0.00940007	0.312247
ENSMUSG00000024078	Ttc27	1472	1050	1316	932	1061	1005	1269	1169	987	923	1789	965	1141.76	-0.134714	0.0616401	-2.19959	0.0278363	0.496785
ENSMUSG00000029436	Mmp17	12799	9256	10622	8284	8683	8795	10064	11167	9496	8700	11563	9409	9827.63	-0.134674	0.0554197	-2.43313	0.0149691	0.382504
ENSMUSG00000040964	Arhgef10l	1772	1236	1457	1076	1101	1250	1493	1437	1240	997	1775	1157	1315.43	-0.134622	0.0619921	-2.17225	0.0298368	0.512942
ENSMUSG00000044813	Shb	774	496	600	478	543	493	590	605	406	499	698	580	557.618	-0.134591	0.0662352	-2.0276	0.0426008	0.589947
ENSMUSG00000050965	Prkca	23469	17080	21234	15032	17625	14901	18492	18641	17627	15995	21411	19837	18309.9	-0.134573	0.0582799	-2.31434	0.0206489	0.432904
ENSMUSG00000046607	Hrk	7863	11374	14199	10380	9219	8650	7949	8842	11457	15146	9665	9662	10443.2	-0.134534	0.064644	-2.05881	0.0395125	0.571008
ENSMUSG00000045903	Npas4	283	216	258	135	175	151	123	138	181	144	297	160	185.887	-0.134517	0.0614581	-2.25991	0.0238269	0.462647
ENSMUSG00000027827	Kcnab1	16097	9814	11689	9103	9510	9706	12340	11850	10244	8869	13044	11325	11008.9	-0.134355	0.0568504	-2.33238	0.0196808	0.423602
ENSMUSG00000036800	Fam135b	585	701	855	714	552	425	474	533	619	635	732	685	626.56	-0.134343	0.0670736	-2.0137	0.0440408	0.596974
ENSMUSG00000013787	Ehmt2	16497	11275	14247	10227	11942	11814	13281	13205	11264	11469	16976	13114	12798.4	-0.134262	0.0513907	-2.60842	0.00909602	0.308764
ENSMUSG00000030209	Grin2b	102138	77613	95607	72556	81347	71437	85470	92297	69262	75980	102622	93756	84333.5	-0.134239	0.0567547	-2.38059	0.0172851	0.404974
ENSMUSG00000005580	Adcy9	4751	4266	5273	4243	4330	2645	4286	3707	4345	4689	4062	4048	4220.95	-0.134051	0.0658777	-2.02123	0.0432556	0.593349
ENSMUSG00000049764	Zfp280b	2453	3046	3661	2937	2728	1859	2375	2246	3057	3433	2322	2801	2766.37	-0.134035	0.0669843	-2.00793	0.0446512	0.598074
ENSMUSG00000035671	Zswim4	1498	1381	1788	1489	1262	1072	1399	1364	1599	1585	1403	1246	1424.49	-0.134008	0.0627382	-2.14651	0.0318325	0.525799
ENSMUSG00000033392	Clasp2	9650	8704	9912	7655	7996	7334	9415	8931	7781	8517	10164	8646	8673.82	-0.133493	0.0526988	-2.53084	0.0113791	0.341036
ENSMUSG00000039210	Gpatch2	1776	1601	2128	1863	1600	1159	1697	1446	1870	1808	1847	1532	1692.07	-0.133489	0.0637449	-2.08082	0.0374499	0.562076
ENSMUSG00000032202	Rab27a	754	1142	1456	1008	747	834	874	939	1132	1184	731	958	988.949	-0.133188	0.06664	-1.95445	0.0506481	0.622092
ENSMUSG00000041607	Mbp	32919	29099	42260	37254	32443	27563	34632	32510	38780	32007	35898	32049	33996.4	-0.1331	0.0611554	-2.15805	0.0309241	0.519358
ENSMUSG00000000804	Usp32	8679	7524	9453	7552	7288	6091	8189	6870	7037	8700	10064	7632	7859.72	-0.132928	0.0557577	-2.38255	0.0171931	0.404974
ENSMUSG00000032243	Itga11	157	145	322	176	189	192	187	126	198	194	165	165	185.776	-0.132884	0.0634277	-2.04528	0.0408276	0.58285
ENSMUSG00000052949	Rnf157	17003	14613	17017	12602	13369	12588	14372	14462	13807	15379	17707	14924	14728.8	-0.132875	0.0535727	-2.49073	0.012748	0.355727
ENSMUSG00000030772	Dkk3	52925	35044	40638	31475	32669	33772	40777	42524	34897	30889	43737	40768	37988.9	-0.13265	0.0564567	-2.34058	0.0192539	0.419743
ENSMUSG00000051486	Pcdhb11	246	229	282	181	179	188	217	235	151	195	198	206	208.352	-0.132643	0.0656016	-2.04313	0.0410399	0.58285
ENSMUSG00000073680	Tmem88b	1113	969	1339	1267	1049	807	1123	972	1180	1055	1171	1024	1089.88	-0.132601	0.0656397	-2.00073	0.045421	0.599439
ENSMUSG00000034636	Zyg11b	10349	7851	8545	6999	7164	6661	8524	7940	6965	7701	10424	8080	8014.41	-0.132467	0.0528024	-2.50148	0.0123677	0.351355
ENSMUSG00000038831	Ralgps1	2593	2778	3151	2750	2023	2097	2233	2201	3011	2981	2644	2567	2592.56	-0.13244	0.0629321	-2.13591	0.0326865	0.533378
ENSMUSG00000074746	Pdzd8	3350	2719	3404	2540	2570	2177	3258	2451	2503	3051	3672	2466	2814.24	-0.132438	0.0575298	-2.3078	0.0210101	0.434074
ENSMUSG00000029627	Zkscan14	745	596	648	490	636	637	736	710	435	536	755	642	626.195	-0.132385	0.0656399	-2.03148	0.042206	0.586642
ENSMUSG00000041708	Mpped1	24272	18059	20081	15154	15798	16766	19002	21190	16653	15878	21212	20227	18546.1	-0.132314	0.0546	-2.43132	0.0150439	0.382504
ENSMUSG00000038020	Rapgefl1	19503	15537	17452	13076	12932	14433	15546	16681	15606	14867	18078	15629	15678.7	-0.132273	0.0524826	-2.52789	0.0114751	0.341763
ENSMUSG00000026452	Syt2	747	1146	1512	720	861	750	694	685	1117	966	977	1018	936.454	-0.132273	0.0670517	-1.94729	0.0514999	0.62665
ENSMUSG00000027971	Ndst4	2105	1126	1490	1160	1214	1289	1404	1444	1250	1110	1636	1540	1383.03	-0.132239	0.0647769	-2.00216	0.045268	0.599153
ENSMUSG00000025408	Ddit3	1103	780	992	759	768	854	998	984	770	702	1092	824	877.058	-0.132136	0.0635704	-2.08547	0.0370267	0.562076
ENSMUSG00000103567	Pcdhga5	286	225	239	251	277	139	255	222	128	215	257	210	224.619	-0.131959	0.0640538	-2.03062	0.0422931	0.586642
ENSMUSG00000020886	Dlg4	67017	45379	53946	40224	43141	44078	52026	58503	41509	41066	63776	49153	49358.8	-0.131848	0.0550196	-2.39165	0.0167727	0.401226
ENSMUSG00000007653	Gabrb2	3423	2697	3532	2552	2985	1914	2798	2197	2408	3305	3727	2818	2835.63	-0.131728	0.0650742	-2.0248	0.0428878	0.590338
ENSMUSG00000032300	1700017B05Rik	1035	963	1038	927	873	645	932	947	1011	956	961	707	915.5	-0.131509	0.0651145	-2.02522	0.0428446	0.590338
ENSMUSG00000048070	Pirt	105	113	135	83	96	53	43	50	100	105	46	45	82.806	-0.131431	0.0502532	-2.88952	0.00385829	0.192935
ENSMUSG00000039470	Zdhhc2	3394	2616	3042	2483	2296	2701	2841	3064	2846	2284	3167	2858	2786.34	-0.1312	0.0591143	-2.23486	0.0254264	0.478563
ENSMUSG00000048706	Lurap1l	2920	2299	2994	2199	2021	2374	2516	2603	2169	2166	2681	3120	2492.9	-0.131169	0.0597023	-2.2319	0.0256213	0.478563
ENSMUSG00000059851	Kmt5c	983	1253	1582	1208	938	897	992	1002	1367	1261	1005	1181	1146.79	-0.130986	0.0660631	-1.97764	0.0479688	0.611829
ENSMUSG00000015846	Rxra	2568	2224	2756	2102	1948	2151	2589	2321	1970	2256	2835	2368	2322.23	-0.130911	0.0556014	-2.35247	0.0186492	0.416697
ENSMUSG00000038143	Stox2	7494	7399	9651	7262	6730	5822	7082	7064	7419	8626	8250	7338	7492.4	-0.130854	0.057253	-2.28212	0.0224822	0.448769
ENSMUSG00000033981	Gria2	51469	37576	46499	35547	36110	34854	41886	40090	37261	38448	54532	41407	40843.6	-0.130787	0.050372	-2.59672	0.00941195	0.312247
ENSMUSG00000040797	Iqsec3	11223	10907	13564	10249	9586	8916	9914	10753	11359	11590	12068	11127	10916.4	-0.130651	0.0550609	-2.38937	0.0168771	0.402668
ENSMUSG00000036777	Anln	1696	1187	1407	1371	1174	1129	1702	1299	1234	1208	1434	1255	1333.3	-0.13059	0.0627495	-2.10487	0.0353029	0.551938
ENSMUSG00000005893	Nr2c2	1880	1890	2201	1853	1670	1325	1857	1642	1568	2051	1957	1875	1809.94	-0.130458	0.0643756	-2.01657	0.0437405	0.59623
ENSMUSG00000059991	Nptx2	2733	1794	1610	1709	1413	1287	1498	1563	1423	1504	2831	1617	1718.05	-0.130416	0.0670119	-1.91248	0.0558142	0.644878
ENSMUSG00000020181	Nav3	4300	5339	5940	5378	4701	3613	3938	3677	5246	6744	5394	4781	4942.81	-0.130254	0.0653713	-2.00817	0.0446257	0.598074
ENSMUSG00000032393	Dpp8	9066	7387	8517	6381	7236	6174	8625	7271	6274	7837	9008	7528	7544.02	-0.130146	0.0565386	-2.3037	0.0212395	0.435578
ENSMUSG00000030713	Klk7	102	54	38	50	37	34	41	19	27	19	42	21	40.272	-0.130114	0.0436239	-2.99482	0.00274608	0.168193
ENSMUSG00000025427	Rnf165	9922	12137	14773	11375	10455	8221	9849	9952	11512	14099	10821	11423	11253.7	-0.130037	0.0642033	-2.00796	0.0446474	0.598074
ENSMUSG00000005886	Ncoa2	4631	3938	4266	3314	3469	3076	3924	3401	3682	4045	4757	3635	3815.74	-0.129821	0.0590625	-2.19948	0.0278441	0.496785
ENSMUSG00000022120	Rnf219	1177	850	954	842	769	860	989	916	806	978	1029	862	913.605	-0.129725	0.0620737	-2.086	0.0369786	0.562076
ENSMUSG00000022641	Bbx	2962	2722	3983	2889	2752	2438	3234	2714	2714	3162	3244	3076	2979.59	-0.129714	0.0616008	-2.09082	0.036544	0.560977
ENSMUSG00000059412	Fxyd2	194	100	166	95	132	152	113	113	97	103	123	160	128.946	-0.129547	0.0609102	-2.1319	0.0330148	0.535305
ENSMUSG00000040125	Gpr26	7390	9396	10053	7007	8100	6410	7576	6203	7040	10446	9731	7941	8095.07	-0.129407	0.0660354	-1.93047	0.0535487	0.63376
ENSMUSG00000051339	2900026A02Rik	14637	13213	15845	12335	11547	9356	12255	13056	13492	12510	12010	14193	12872.3	-0.12933	0.0637922	-2.06695	0.038739	0.568585
ENSMUSG00000078716	Tmem8b	10315	7865	9891	7545	7391	7277	8386	9275	7860	8228	10012	8579	8487.61	-0.129179	0.0534523	-2.428	0.0151824	0.383808
ENSMUSG00000022508	Bcl6	7317	4867	6042	4550	4648	5522	6278	6245	5055	4444	6258	5927	5549.99	-0.12912	0.0559812	-2.3083	0.0209826	0.434074
ENSMUSG00000040631	Dok4	1728	1550	1982	1554	1331	1380	1415	1624	1706	1633	1722	1676	1606.25	-0.129014	0.0601313	-2.18233	0.0290853	0.508686
ENSMUSG00000038342	Mlxip	3684	4058	5140	4070	3471	2824	3488	3465	4481	4440	3640	3940	3906.9	-0.128984	0.0642201	-2.01944	0.0434411	0.59381
ENSMUSG00000031673	Cdh11	5562	4988	6068	4827	4107	4155	5093	5348	4688	4891	6126	4900	5025.49	-0.128897	0.051637	-2.49604	0.0125587	0.353193
ENSMUSG00000033510	Otud7a	2779	2187	2162	1674	2188	1880	2155	2352	1818	2286	2481	2037	2154.45	-0.128697	0.0629883	-2.04011	0.0413389	0.583134
ENSMUSG00000046269	Usp27x	1566	1419	1713	1294	1471	1620	1604	1433	1051	1540	2362	1577	1537.15	-0.128622	0.0625652	-2.05474	0.0399039	0.575297
ENSMUSG00000026842	Abl1	2414	2223	2617	2115	2221	1835	2408	2158	2021	2445	2558	2259	2265.02	-0.128614	0.06095	-2.10347	0.0354245	0.552568
ENSMUSG00000033389	Arhgap44	8350	6112	7409	5519	5909	6038	7035	6903	6040	6326	8290	6601	6647.31	-0.128545	0.0507322	-2.53151	0.0113572	0.341036
ENSMUSG00000023236	Scg5	16516	9819	12350	8791	8798	11367	12635	11484	9815	8851	16141	11132	11281	-0.128503	0.0584797	-2.15746	0.0309698	0.519358
ENSMUSG00000040022	Rab11fip2	4306	4279	5208	3864	3704	3191	4398	3780	3892	4637	4345	4087	4128.19	-0.128462	0.0614085	-2.08695	0.0368926	0.562076
ENSMUSG00000036432	Siah2	1055	883	1017	775	647	766	830	811	958	733	946	896	856.386	-0.12826	0.0648747	-1.99319	0.0462411	0.603714
ENSMUSG00000029673	Auts2	6712	6920	8945	5713	6089	6435	6865	6029	6606	7925	8141	6622	6887.68	-0.128015	0.059956	-2.11501	0.0344289	0.546059
ENSMUSG00000024883	Rin1	7187	5328	6343	5128	5149	4695	5629	6003	5405	5509	7316	5429	5706.52	-0.127983	0.0544325	-2.35426	0.0185597	0.416697
ENSMUSG00000032816	Igdcc4	2176	2683	3065	2471	1903	1874	2382	2122	2435	3100	2159	2180	2386.12	-0.127928	0.0643413	-1.97206	0.0486032	0.613489
ENSMUSG00000041415	Dicer1	7668	10106	12062	9642	8796	6242	7551	7679	10524	11289	8180	9187	9148.42	-0.127733	0.0661788	-1.91571	0.0554016	0.643251
ENSMUSG00000041977	Arhgef11	3790	3165	3512	3052	3150	2464	3739	3088	2710	3086	3682	3406	3217.86	-0.127708	0.0616579	-2.07527	0.0379618	0.565897
ENSMUSG00000022973	Synj1	22204	17605	19809	15423	17434	15402	18965	17978	16523	18025	23662	18203	18271.5	-0.127578	0.0513269	-2.48512	0.0129506	0.358688
ENSMUSG00000050121	Opalin	322	218	353	401	265	251	234	307	317	240	364	204	289.972	-0.127513	0.0648548	-1.9878	0.046834	0.608096
ENSMUSG00000038042	Ptpdc1	1858	1684	2205	1910	1719	1541	1838	1713	1890	2029	1825	1868	1843.14	-0.127506	0.0628765	-2.03308	0.0420449	0.586324
ENSMUSG00000041258	Zfp236	2144	2108	2853	2096	2011	1915	2118	1992	2118	2650	2688	2087	2222.37	-0.127502	0.0587387	-2.1591	0.0308426	0.519358
ENSMUSG00000036242	Armh4	1410	1069	1236	1020	936	953	1254	1038	1068	957	1252	1200	1108.74	-0.127293	0.0629185	-2.03239	0.0421143	0.586324
ENSMUSG00000026880	Stom	860	893	1206	976	740	708	1025	791	848	938	782	931	892.897	-0.127217	0.0667122	-1.91779	0.055137	0.642478
ENSMUSG00000071267	Zfp942	709	673	714	491	460	572	607	635	432	661	749	539	597.755	-0.127033	0.0666267	-1.90549	0.0567166	0.645799
ENSMUSG00000042348	Arl15	6328	3911	4752	3736	3700	4176	4943	4866	3925	3840	5570	4450	4461.17	-0.12696	0.0563357	-2.22507	0.0260762	0.481417
ENSMUSG00000030226	Lmo3	18200	11366	14038	10265	11023	11202	14188	14259	11386	10439	15645	13047	12759	-0.126857	0.0554611	-2.262	0.0236973	0.462118
ENSMUSG00000040524	Zfp609	3905	4073	5306	3968	3766	2712	3729	3604	4156	4538	3809	3991	3968.31	-0.126801	0.0648426	-1.94932	0.0512577	0.625789
ENSMUSG00000026827	Gpd2	10841	8086	9048	7297	7551	7685	9684	9176	7441	7390	10651	8887	8559.74	-0.126782	0.0504012	-2.51581	0.0118758	0.347685
ENSMUSG00000037465	Klf10	2032	1226	1656	1209	1303	1364	1409	1566	1250	1284	2219	1299	1460.72	-0.126727	0.0641221	-1.97568	0.0481905	0.611881
ENSMUSG00000031016	Wee1	1200	1105	1300	952	823	919	975	985	1144	1215	1085	984	1055.25	-0.126644	0.063801	-2.01123	0.0443015	0.598074
ENSMUSG00000028893	Sesn2	1020	877	1108	1056	739	776	932	953	972	952	736	1002	931.178	-0.126633	0.0662632	-1.96944	0.0489031	0.61467
ENSMUSG00000040548	Tex2	11595	8665	10909	8141	9106	8504	10753	9762	8858	9395	10712	9802	9623.44	-0.126572	0.0550778	-2.30297	0.0212806	0.435931
ENSMUSG00000051335	Gfod1	11951	9433	12422	8104	8692	7993	10027	9443	9325	9451	12631	10043	9851.53	-0.126524	0.0541191	-2.33838	0.0193677	0.420832
ENSMUSG00000038417	Fig4	3507	2522	2668	2369	2578	2294	3167	2580	2218	2582	3670	2608	2697.6	-0.126103	0.0535042	-2.35146	0.0186997	0.416697
ENSMUSG00000039849	Pcif1	2311	1564	1952	1446	1588	1675	1996	1991	1580	1695	1927	1639	1766.95	-0.126082	0.0610563	-2.06669	0.0387631	0.568585
ENSMUSG00000039879	Heca	3203	2030	2838	2101	2017	2097	2772	2631	2013	1985	2879	2466	2389.67	-0.126074	0.0600443	-2.09405	0.0362553	0.558423
ENSMUSG00000028351	Brinp1	20603	14211	16817	12266	13800	13258	16195	16154	13736	13343	19962	15749	15321.1	-0.126049	0.052773	-2.37642	0.0174815	0.404974
ENSMUSG00000044288	Cnr1	4775	4777	6098	4836	4211	4002	4951	4699	4782	5603	5600	4398	4875.96	-0.125864	0.0540132	-2.31228	0.0207622	0.433583
ENSMUSG00000042105	Inpp5f	5370	4206	4658	3757	4053	4018	4902	4812	4096	4010	5031	4401	4416.39	-0.125861	0.0550933	-2.28962	0.0220435	0.444485
ENSMUSG00000078117	Gm16485	1140	1468	1844	1416	1257	1278	1220	1169	1286	1775	1824	1401	1420.87	-0.125768	0.0641127	-1.90379	0.056938	0.646867
ENSMUSG00000097929	Tunar	1471	1223	1504	1224	988	1091	1238	1517	1142	1044	1512	1244	1257.03	-0.125736	0.0630995	-2.01169	0.0442525	0.598074
ENSMUSG00000096146	Kcnj11	3385	2579	3176	2098	2592	2428	2618	2736	2646	2444	3319	3016	2733.45	-0.125702	0.059452	-2.13121	0.0330717	0.535305
ENSMUSG00000050846	Zfp623	878	658	708	723	681	675	815	671	646	739	873	694	726.748	-0.125586	0.0640591	-1.95911	0.0501001	0.618692
ENSMUSG00000049939	Lrrc4	8774	7285	8718	6422	6763	7114	7604	8082	6873	7544	9280	8042	7656.09	-0.125506	0.0506055	-2.49024	0.0127658	0.355727
ENSMUSG00000055717	Slain1	1497	1190	1377	1150	1013	1160	1391	1310	962	1017	1367	1562	1242.07	-0.125424	0.0638376	-2.00387	0.0450843	0.598074
ENSMUSG00000031558	Slit2	978	884	1108	1102	805	852	1248	796	729	1027	1305	768	957.757	-0.125248	0.066306	-1.92863	0.0537772	0.6347
ENSMUSG00000049807	Arhgap23	10762	7404	8714	6748	7487	7732	8121	8691	8299	7226	9677	8563	8233.33	-0.12523	0.0582578	-2.15614	0.0310727	0.519358
ENSMUSG00000046380	Jrk	631	578	744	663	536	473	564	547	552	616	855	563	605.429	-0.125144	0.0654708	-1.9121	0.0558628	0.644878
ENSMUSG00000051401	Kctd16	436	336	354	261	334	343	307	305	303	313	553	251	337.129	-0.12514	0.0667566	-1.91864	0.0550293	0.642243
ENSMUSG00000066687	Zbtb16	5324	5560	6553	5388	5228	3542	5127	4506	5831	5734	4642	5502	5270.08	-0.125131	0.066567	-1.89519	0.058067	0.650391
ENSMUSG00000036030	Prtg	955	1411	1691	1216	1053	862	1046	892	1469	1575	772	1107	1186.07	-0.124887	0.0664484	-1.94373	0.0519284	0.628855
ENSMUSG00000038178	Slc43a2	4558	4942	5614	4585	4118	3796	4644	4850	4751	4960	4714	4658	4685.96	-0.124822	0.0592684	-2.09481	0.0361882	0.55786
ENSMUSG00000018209	Stk4	5170	5212	6621	5024	4502	4183	5113	5053	5237	6023	5056	5193	5198.52	-0.124822	0.0598824	-2.0888	0.0367259	0.562076
ENSMUSG00000028613	Lrp8	5353	5784	6926	5965	5242	4487	5863	5039	5717	6819	5960	5473	5723.46	-0.124795	0.0614863	-2.00437	0.0450306	0.598074
ENSMUSG00000037843	Vstm2l	1615	918	931	856	896	1128	1042	1216	968	734	1202	1137	1046.75	-0.124646	0.0667302	-1.83948	0.0658445	0.675778
ENSMUSG00000074500	Zfp558	127	69	120	84	89	94	92	51	50	117	92	59	86.6841	-0.124332	0.055094	-2.37335	0.0176276	0.406034
ENSMUSG00000020635	Fkbp1b	2468	1563	1998	1496	1384	1606	1772	1897	1821	1516	1672	1944	1752.91	-0.124266	0.0637116	-1.96075	0.0499085	0.618692
ENSMUSG00000057766	Ankrd29	547	706	782	752	628	595	689	580	683	846	608	572	671.36	-0.124258	0.0670753	-1.81005	0.070288	0.686712
ENSMUSG00000033706	Smyd5	2465	1941	2040	1834	1868	1827	1998	1997	1804	1791	3135	1923	2027.15	-0.124251	0.0595413	-2.10569	0.0352317	0.551938
ENSMUSG00000024241	Sos1	3615	3511	4354	3204	2993	2825	3440	3102	3526	3887	3683	3521	3463.6	-0.124223	0.060131	-2.0729	0.0381814	0.567003
ENSMUSG00000029174	Tbc1d1	4089	2996	3198	2789	2666	2483	3108	3228	3129	2694	3336	3142	3055.52	-0.124151	0.0622481	-1.99656	0.0458727	0.601054
ENSMUSG00000027792	Bche	73	147	213	113	110	111	64	106	94	178	101	85	117.679	-0.12411	0.0574673	-2.16511	0.030379	0.516828
ENSMUSG00000067629	Syngap1	33157	24551	29502	22318	24671	23048	27335	29460	23798	23891	33909	27093	26633	-0.124108	0.0519322	-2.39435	0.01665	0.401226
ENSMUSG00000014303	Glis2	750	973	1191	845	737	713	817	747	1024	1072	749	769	870.877	-0.12409	0.0668408	-1.85025	0.0642779	0.669335
ENSMUSG00000097789	Gm2115	22008	18865	22488	19488	15976	13833	17445	19950	20591	17595	16686	21346	18886.1	-0.124051	0.0647682	-1.98261	0.0474111	0.608916
ENSMUSG00000022978	Mis18a	562	352	466	249	363	422	360	464	423	275	463	330	391.22	-0.123968	0.0668332	-1.85488	0.0636129	0.665747
ENSMUSG00000063919	Srrm4	1839	2036	2572	1666	1894	1871	2031	1796	1664	2106	2882	1899	2003.67	-0.123954	0.0628858	-1.92755	0.0539117	0.6347
ENSMUSG00000027977	Ndst3	1905	1484	1789	1442	1276	1443	1637	1632	1493	1397	1978	1586	1575	-0.123793	0.058438	-2.12059	0.033956	0.542883
ENSMUSG00000038658	Ric1	2411	2233	2673	2328	1997	1885	2212	2206	2421	2624	2277	2229	2293.15	-0.123772	0.0609195	-2.05093	0.0402734	0.579251
ENSMUSG00000046096	Mosmo	2570	1953	2831	2009	2107	1929	2237	2031	2276	2467	2557	2286	2259.68	-0.12377	0.059247	-2.10122	0.0356215	0.55286
ENSMUSG00000034931	Dhx8	3221	2488	2620	2395	2531	2277	2872	2606	2228	2844	3175	2559	2633.75	-0.123753	0.0568172	-2.17666	0.0295062	0.509805
ENSMUSG00000002083	Bbc3	778	780	971	767	873	763	613	713	960	913	716	934	824.186	-0.123529	0.0670657	-1.94858	0.0513456	0.626444
ENSMUSG00000030067	Foxp1	9192	6448	7919	6235	6106	6412	7669	8543	6302	5899	8340	7414	7141.91	-0.123448	0.0575991	-2.15405	0.0312364	0.520497
ENSMUSG00000020099	Unc5b	747	888	1129	1090	913	737	1095	774	880	891	1052	789	916.766	-0.123355	0.0670514	-1.76815	0.0770352	0.70329
ENSMUSG00000044066	Cep68	2629	3000	3443	2688	2319	2288	2603	2454	3005	3457	2561	2679	2769.78	-0.12327	0.0638681	-1.94284	0.052035	0.628948
ENSMUSG00000024622	Hmgxb3	2423	2125	2718	1965	2225	1694	2177	1891	2141	2527	2493	2219	2208.53	-0.123249	0.0636976	-1.94203	0.0521333	0.629131
ENSMUSG00000069114	Zbtb10	958	1162	1526	1168	1052	970	1103	989	1148	1410	1098	1155	1149.73	-0.123078	0.0660805	-1.81897	0.068916	0.686212
ENSMUSG00000030096	Slc6a6	6488	5427	6586	4874	5131	4609	5949	5197	5511	5782	7146	5233	5612.21	-0.123058	0.0529957	-2.32279	0.0201907	0.429011
ENSMUSG00000047227	Gm527	260	336	424	352	321	247	250	300	365	376	334	271	321.912	-0.122834	0.0669886	-1.80578	0.0709521	0.688872
ENSMUSG00000048732	Klhl11	444	354	430	403	404	227	491	295	303	394	344	313	366.173	-0.122745	0.0660414	-1.87968	0.0601512	0.654437
ENSMUSG00000028988	Ctnnbip1	933	663	912	660	660	791	791	823	740	648	894	829	774.145	-0.122652	0.063761	-1.93026	0.0535748	0.63376
ENSMUSG00000063317	Usp31	8777	7952	10402	7604	7318	6819	7997	7832	8376	8662	10246	8241	8299.98	-0.122531	0.0517826	-2.37115	0.0177327	0.406034
ENSMUSG00000061414	Cracr2a	106	138	172	140	141	134	108	72	150	150	109	110	129.84	-0.122512	0.0582312	-2.16469	0.0304117	0.516828
ENSMUSG00000027285	Haus2	1488	956	1204	1005	962	1083	1312	1038	1034	1083	1208	1229	1126.31	-0.122495	0.0611167	-2.00637	0.0448168	0.598074
ENSMUSG00000002908	Kcnn1	985	744	923	727	625	718	823	930	785	656	991	633	787.465	-0.122428	0.0653203	-1.89197	0.0584956	0.650466
ENSMUSG00000053930	Shisa6	10508	9385	12296	9363	8357	6922	8702	9669	10666	9867	8304	10281	9542.5	-0.122295	0.0642349	-1.96375	0.0495596	0.617467
ENSMUSG00000021313	Ryr2	13980	10730	12759	9704	11335	10338	11992	11746	10367	10970	15772	12160	11706.1	-0.122266	0.0499747	-2.45061	0.0142612	0.37234
ENSMUSG00000049536	Tceal1	2260	1441	1807	1352	1405	1587	1871	1966	1182	1411	2013	1767	1650.95	-0.122151	0.0625649	-1.95605	0.0504587	0.621184
ENSMUSG00000024059	Clip4	3957	2795	3002	2469	2600	2531	3196	3212	2681	2397	3671	2959	2925.27	-0.122035	0.0579421	-2.09618	0.0360658	0.557387
ENSMUSG00000034987	Hrh2	295	472	570	368	431	357	348	299	387	473	488	410	409.791	-0.12202	0.0663236	-1.72997	0.0836355	0.721415
ENSMUSG00000026389	Steap3	383	314	373	268	244	285	336	334	255	295	276	325	306.441	-0.121929	0.0670618	-1.84555	0.0649574	0.67211
ENSMUSG00000062519	Zfp398	1389	1272	1541	1210	1057	1098	1270	1026	1369	1488	1538	1118	1275.26	-0.121857	0.0634836	-1.93894	0.0525087	0.630783
ENSMUSG00000030110	Ret	149	118	182	350	189	87	225	125	105	182	193	72	165.819	-0.121821	0.0587952	-1.98524	0.0471182	0.608096
ENSMUSG00000075478	Slitrk1	4634	3508	3957	2907	3409	3246	3933	3852	2933	3361	5351	3577	3668.69	-0.121785	0.0535748	-2.27398	0.0229674	0.45368
ENSMUSG00000028053	Ash1l	10017	8098	9562	6998	8301	7170	9219	8174	8234	8165	10758	8248	8508.49	-0.121768	0.0527401	-2.30656	0.0210795	0.434693
ENSMUSG00000032532	Cck	20144	11419	13141	9621	10729	13050	13875	15419	11712	8977	15986	14474	13047	-0.121709	0.0615175	-1.93812	0.0526088	0.631306
ENSMUSG00000021959	Lats2	1896	1536	1967	1790	1625	1440	1712	1828	1650	1757	1867	1763	1733.1	-0.121677	0.062058	-1.9698	0.0488611	0.61467
ENSMUSG00000021720	Rnf180	585	431	571	426	478	379	582	522	412	421	496	422	474.103	-0.12155	0.0669423	-1.83492	0.0665177	0.679244
ENSMUSG00000040907	Atp1a3	192220	147400	165313	125034	146211	138238	165945	177660	139650	129756	202840	154800	155500	-0.121524	0.0498968	-2.43945	0.0147096	0.380096
ENSMUSG00000070866	Zfp804a	1979	2046	2333	2082	1835	1524	1743	2009	2095	2272	2065	1962	1999.48	-0.121506	0.0625838	-1.95996	0.0500004	0.618692
ENSMUSG00000038351	Sgsm2	6193	4628	5559	3999	4097	4134	4933	4718	4301	4749	6654	4657	4820.4	-0.121476	0.0553767	-2.19003	0.0285221	0.503755
ENSMUSG00000038368	Focad	1578	1326	1600	1337	1336	1125	1487	1245	1433	1428	1950	1179	1405.95	-0.121442	0.0596466	-2.04248	0.0411035	0.58285
ENSMUSG00000035614	Togaram1	2745	2092	2553	1945	2151	1883	2689	2289	1894	2159	2861	2172	2261.26	-0.12138	0.0560655	-2.16762	0.0301878	0.516456
ENSMUSG00000022332	Khdrbs3	21245	12920	16856	12495	12864	15207	16715	18029	14094	11319	19010	16174	15402	-0.12133	0.0594646	-2.03537	0.0418136	0.58529
ENSMUSG00000028078	Dclk2	7625	5444	6036	4836	5102	5161	5819	6331	5795	4803	7207	5714	5772.91	-0.121244	0.0582709	-2.08326	0.0372277	0.562076
ENSMUSG00000040136	Abcc8	1473	1241	1285	914	1182	1053	1087	1034	1288	982	1883	1125	1199.02	-0.121166	0.0651663	-1.90313	0.0570235	0.646867
ENSMUSG00000032841	Prr5l	424	428	455	440	450	310	445	365	439	448	260	341	405.687	-0.121149	0.0640372	-1.97804	0.0479241	0.611686
ENSMUSG00000038987	Cfap157	298	262	362	313	361	245	454	291	212	231	292	218	294.822	-0.12114	0.0632443	-2.03092	0.0422629	0.586642
ENSMUSG00000020423	Btg2	3715	4838	7068	4586	4439	3465	3585	3664	5567	6272	4221	4917	4725.9	-0.121108	0.0663916	-1.84481	0.0650645	0.672659
ENSMUSG00000030657	Xylt1	4292	6313	7665	5922	5016	4029	5092	4823	5483	7306	5832	5291	5603.16	-0.120961	0.0649305	-1.74962	0.0801848	0.712875
ENSMUSG00000037151	Lrrc20	3075	2418	2940	2244	2393	2455	2665	3031	2489	2364	3091	2617	2633	-0.120783	0.0574843	-2.11464	0.0344607	0.546059
ENSMUSG00000001687	Ubl3	6679	4458	5661	4392	4298	4434	5929	5470	4362	4458	6257	4993	5053.12	-0.120777	0.0531097	-2.26697	0.0233918	0.458098
ENSMUSG00000054051	Ercc6	1563	1470	1913	1664	1356	1215	1578	1448	1693	1752	1711	1349	1556.65	-0.120664	0.0601638	-1.99863	0.0456485	0.600324
ENSMUSG00000029467	Atp2a2	48484	39290	47373	39376	37868	34245	46820	41452	35874	40683	55604	41760	41955.1	-0.120632	0.0496511	-2.42885	0.0151469	0.383675
ENSMUSG00000020251	Glt8d2	1091	727	819	770	605	804	871	897	672	617	1070	772	800.347	-0.120619	0.0661976	-1.81152	0.0700611	0.686212
ENSMUSG00000027324	Rpusd2	457	326	378	273	397	312	334	371	232	347	385	400	349.665	-0.120599	0.0664832	-1.84074	0.0656595	0.674784
ENSMUSG00000002221	Paxip1	2666	2702	3317	2554	2314	2257	2585	2414	2984	3036	2672	2655	2682.68	-0.120538	0.0616294	-1.96854	0.0490063	0.614756
ENSMUSG00000032502	Stac	1120	579	769	755	769	724	685	870	700	618	836	879	773.201	-0.120534	0.0670005	-1.81263	0.069889	0.686212
ENSMUSG00000054280	Prr14l	6141	5891	7418	5535	5549	4324	5402	5358	6315	6846	5524	6038	5870.4	-0.120365	0.0643786	-1.90352	0.0569725	0.646867
ENSMUSG00000051851	Rtl8c	4525	3002	3699	2748	3089	2995	3508	3491	2607	3091	5111	3372	3379.32	-0.120355	0.0582961	-2.06291	0.0391216	0.568928
ENSMUSG00000048304	Slitrk3	9266	9696	11393	8851	8315	6592	8390	8653	9880	9981	8674	9602	9125.5	-0.120316	0.0637763	-1.90778	0.0564194	0.645582
ENSMUSG00000005267	Zfp287	1035	1186	1493	1088	1054	860	975	1042	1261	1240	1220	1108	1131.58	-0.120301	0.0645615	-1.85547	0.0635294	0.665686
ENSMUSG00000025019	Lcor	213	428	601	456	437	174	234	234	399	440	318	360	363.695	-0.120299	0.060893	-1.76073	0.0782847	0.705068
ENSMUSG00000031870	Pgr	1397	1253	1470	1142	1164	1198	1090	1322	1194	1461	1471	1359	1290.78	-0.120249	0.0623956	-1.97816	0.0479103	0.611686
ENSMUSG00000063455	D630045J12Rik	5042	5293	6293	4892	4820	4194	4625	4766	4950	5601	7007	5267	5199.25	-0.120204	0.0563595	-2.1371	0.0325895	0.533378
ENSMUSG00000071064	Zfp827	5161	4545	5597	4024	4278	4188	4789	4794	4093	4879	5819	4925	4723.01	-0.120204	0.0539456	-2.23129	0.0256623	0.478563
ENSMUSG00000000732	Icosl	771	685	715	653	579	535	765	834	712	510	624	499	656.386	-0.120169	0.0670219	-1.87052	0.0614112	0.660894
ENSMUSG00000032806	Slc10a3	156	119	140	109	96	118	136	78	116	92	119	102	114.966	-0.120108	0.0606387	-2.02605	0.04276	0.590338
ENSMUSG00000001998	Ap4e1	382	457	777	512	475	289	409	459	553	532	483	374	475.975	-0.120034	0.0670613	-1.68709	0.0915858	0.73978
ENSMUSG00000018654	Ikzf1	178	193	295	148	131	103	187	154	151	163	98	130	161.041	-0.120014	0.0607355	-1.99829	0.0456854	0.600324
ENSMUSG00000057147	Dph6	1236	897	983	957	946	861	1105	1106	893	862	1137	943	988.697	-0.119953	0.0644855	-1.864	0.0623215	0.664708
ENSMUSG00000005958	Ephb3	2743	1956	2351	1802	1719	1847	2182	2336	1890	1769	2477	2247	2089.96	-0.119924	0.0594509	-2.0189	0.0434979	0.59381
ENSMUSG00000040649	Rimklb	1392	1309	1744	1263	1299	1202	1408	1462	1142	1449	2048	1142	1388.64	-0.119899	0.0615837	-1.94387	0.0519114	0.628855
ENSMUSG00000038250	Usp38	1414	1185	1448	1188	1095	1212	1420	1289	1347	1248	1422	1092	1275.53	-0.119864	0.0622667	-1.93405	0.0531076	0.631803
ENSMUSG00000056310	Tyw1	811	804	917	720	691	758	824	840	694	711	1064	771	794.741	-0.119797	0.0629857	-1.88967	0.0588024	0.651763
ENSMUSG00000036529	Sbf1	13202	10049	11967	9202	9853	8473	11228	10877	10396	9684	13774	10183	10631.8	-0.119769	0.0519889	-2.30011	0.021442	0.438743
ENSMUSG00000032280	Tle3	4686	3361	3724	3301	3461	3433	4344	3835	3207	3199	5154	3640	3735.23	-0.119764	0.0536735	-2.23179	0.025629	0.478563
ENSMUSG00000019951	Uhrf1bp1l	6817	5025	5696	4761	4954	4632	5742	5380	4845	5384	6765	5485	5408.72	-0.119705	0.0531927	-2.24723	0.0246254	0.468643
ENSMUSG00000039164	Naif1	791	968	1131	921	998	793	874	873	875	1187	1060	867	947.277	-0.11966	0.0659826	-1.74881	0.0803246	0.71323
ENSMUSG00000063887	Nlgn1	4445	3277	3771	2917	3188	3062	3916	3636	2706	3472	4835	3371	3501.09	-0.119615	0.0539186	-2.217	0.0266228	0.486402
ENSMUSG00000032925	Itgbl1	528	451	562	446	411	447	551	471	312	566	437	496	472.026	-0.119487	0.067068	-1.84375	0.0652191	0.672911
ENSMUSG00000023046	Igfbp6	882	814	895	518	687	733	672	513	489	701	1562	661	742.468	-0.119467	0.0663259	-1.96383	0.0495493	0.617467
ENSMUSG00000034312	Iqsec1	12108	9523	11071	8234	9178	8668	10817	9917	9709	9432	11712	10180	9975.14	-0.119446	0.0532751	-2.24439	0.0248071	0.470665
ENSMUSG00000000402	Egfl6	1171	729	1082	750	781	754	887	1002	692	762	858	1036	869.485	-0.1194	0.0668419	-1.82531	0.067955	0.683542
ENSMUSG00000020827	Mink1	25530	18726	21330	17210	18401	17376	21386	21711	16771	18904	27854	19693	20149.8	-0.119399	0.0493285	-2.4188	0.0155717	0.386687
ENSMUSG00000062232	Rapgef2	10881	7762	9649	7009	8196	7168	8990	8922	7426	7850	11238	8916	8568.55	-0.119368	0.0540419	-2.20526	0.0274357	0.493842
ENSMUSG00000033006	Sox10	539	572	630	604	491	419	584	493	531	542	584	523	543.022	-0.119277	0.066887	-1.75782	0.0787781	0.705178
ENSMUSG00000041624	Gucy1a2	193	160	173	213	139	150	124	129	125	129	197	214	162.7	-0.119263	0.0614761	-2.03058	0.0422979	0.586642
ENSMUSG00000026117	Zap70	227	119	113	129	103	124	142	95	118	75	133	127	124.892	-0.119251	0.0591187	-1.99917	0.0455897	0.600324
ENSMUSG00000047485	Klhl34	2040	1552	1780	1382	1620	1148	1740	1509	1559	1555	1921	1498	1595.79	-0.119248	0.062723	-1.88066	0.0600181	0.654437
ENSMUSG00000029534	St7	1162	727	1014	834	765	867	909	1044	854	758	1062	827	895.104	-0.119201	0.0656998	-1.81935	0.068858	0.686212
ENSMUSG00000052512	Nav2	4142	5606	6937	5559	5015	4106	4428	4703	6274	6171	4801	5570	5321.74	-0.119192	0.0654232	-1.78331	0.0745362	0.696944
ENSMUSG00000033557	Fam20b	5321	4116	5416	4302	4299	3876	5115	4691	4244	4974	5222	4427	4637.63	-0.119185	0.05546	-2.1519	0.0314052	0.521911
ENSMUSG00000021366	Hivep1	1394	2202	2603	1784	1844	1462	1705	1314	1887	2622	2164	1634	1888.73	-0.119178	0.0670718	-1.68227	0.092516	0.744533
ENSMUSG00000033004	Mycbp2	17043	13506	15731	11677	19646	12281	14552	14538	13537	15079	21162	14737	15199.5	-0.119085	0.0602917	-1.94117	0.0522371	0.629327
ENSMUSG00000031425	Plp1	26822	23640	35484	29283	24356	20621	31351	28127	30207	23751	28574	23146	27042	-0.119073	0.062182	-1.91251	0.0558105	0.644878
ENSMUSG00000050321	Neto1	1875	2187	2816	2146	1931	1434	1680	1913	2207	2757	2368	1853	2096.13	-0.119061	0.0627729	-1.89898	0.0575667	0.648856
ENSMUSG00000039419	Cntnap2	11449	8134	9168	7122	8773	7039	9329	9250	7703	7798	10293	9349	8712.76	-0.11901	0.0593362	-1.9969	0.0458357	0.601001
ENSMUSG00000078816	Prkcg	92061	63935	70486	52685	61122	60423	71642	78290	61328	54460	83395	71582	67744.6	-0.119003	0.0551672	-2.15164	0.0314256	0.521911
ENSMUSG00000020950	Foxg1	6598	5062	6112	4269	4461	5410	6222	6391	4507	4658	6469	5443	5412.13	-0.11898	0.0537374	-2.21911	0.0264795	0.485245
ENSMUSG00000035390	Brsk1	10194	8226	10096	7421	7871	7739	9249	8708	8468	8663	11053	8472	8771.26	-0.118967	0.0487822	-2.44005	0.0146854	0.380096
ENSMUSG00000018427	Ypel2	3096	3789	5541	3779	3543	3067	3114	2909	4041	5440	4791	3448	3872.15	-0.118939	0.0636571	-1.85047	0.0642452	0.669335
ENSMUSG00000048988	Elfn1	446	552	732	647	575	420	462	460	686	581	387	598	554.454	-0.1189	0.0654244	-1.86039	0.0628307	0.665686
ENSMUSG00000021027	Ralgapa1	4524	3466	3970	3389	3145	3139	3622	3326	3745	3689	4643	3620	3662.31	-0.118879	0.0579387	-2.06151	0.0392548	0.569991
ENSMUSG00000045689	Pcdhb4	232	221	285	139	213	197	178	199	137	161	299	241	206.429	-0.118791	0.0647218	-1.87293	0.0610783	0.659255
ENSMUSG00000057706	Mex3b	1360	949	1182	912	967	757	913	902	1113	938	1151	1096	1015.11	-0.118649	0.0666234	-1.80394	0.0712408	0.689184
ENSMUSG00000055866	Per2	3443	2592	3036	2482	2634	1991	2456	2634	2431	2944	3306	2833	2712.18	-0.118636	0.0634928	-1.88208	0.0598258	0.654437
ENSMUSG00000046532	Ar	4682	3392	4278	3391	3652	3377	3999	4084	3527	3707	4296	4121	3854.59	-0.118631	0.0588524	-2.02559	0.0428066	0.590338
ENSMUSG00000034910	Pygo1	7755	6682	8605	6209	5853	5635	7408	6760	7144	7112	7538	6690	6910.35	-0.118623	0.0533006	-2.22997	0.0257495	0.478595
ENSMUSG00000036502	Tmem255a	1022	1216	1423	772	1034	1031	1071	863	711	1396	1337	1051	1071.11	-0.118436	0.0668097	-1.77592	0.0757469	0.702149
ENSMUSG00000032020	Ubash3b	1338	1117	1752	1138	1129	1138	1145	1352	1316	1420	1416	1186	1282.07	-0.118425	0.0618365	-1.93655	0.0528008	0.631601
ENSMUSG00000051067	Lingo3	5617	4108	4696	3674	3665	3193	3998	4657	4838	3315	4148	4348	4174.61	-0.118367	0.0651266	-1.85566	0.0635015	0.665686
ENSMUSG00000060260	Pwwp2b	3080	2186	2172	1850	2131	2023	2363	2277	2348	2037	2399	2291	2255.17	-0.118343	0.0642721	-1.83984	0.065791	0.675756
ENSMUSG00000021068	Nin	3124	2660	3526	2945	2877	2326	2985	2922	3101	2886	3506	2829	2962.96	-0.118301	0.0588388	-2.00418	0.0450508	0.598074
ENSMUSG00000041164	Zmiz2	10543	9407	11060	8116	8703	8383	8921	9547	9705	9917	11770	9435	9574.06	-0.118249	0.0534388	-2.23095	0.0256843	0.478563
ENSMUSG00000022201	Zfr	21695	17653	20499	17030	16761	15087	19977	17730	16414	19519	23773	18105	18513.4	-0.118214	0.0496453	-2.38064	0.0172826	0.404974
ENSMUSG00000031217	Efnb1	938	774	978	752	730	914	811	797	717	983	1202	759	855.515	-0.118097	0.065197	-1.82199	0.068457	0.685297
ENSMUSG00000052544	St6galnac3	740	928	1141	933	758	543	846	785	928	912	683	774	836.071	-0.118054	0.0670738	-1.72268	0.0849469	0.725504
ENSMUSG00000025409	Mbd6	1802	2098	2530	2162	2132	1604	1463	1612	2644	2088	2671	2217	2092.49	-0.117947	0.0659327	-1.87513	0.0607745	0.657948
ENSMUSG00000036882	Arhgap33	6016	5214	5507	4074	4351	4722	4994	4704	4012	5638	7944	4299	5047.22	-0.117933	0.0624528	-1.91613	0.0553479	0.643251
ENSMUSG00000029359	Tesc	2436	1506	1719	1547	1293	1668	1581	1974	1547	1358	2376	1516	1688.29	-0.117918	0.0661559	-1.77705	0.0755606	0.701356
ENSMUSG00000043259	Fam13c	3535	2677	3221	2487	2631	2503	2898	3048	2823	2742	3833	2648	2891.96	-0.117709	0.0552111	-2.13852	0.0324745	0.533026
ENSMUSG00000024785	Rcl1	916	710	688	603	557	575	729	714	584	641	805	674	677	-0.117634	0.0644452	-1.80563	0.0709761	0.688872
ENSMUSG00000027313	Chac1	268	275	341	326	247	281	243	292	247	344	289	310	289.999	-0.117626	0.0670633	-1.76792	0.0770748	0.70329
ENSMUSG00000016346	Kcnq2	35726	28509	34281	25573	26649	25125	30493	32898	27079	27856	38149	29959	29894.7	-0.117626	0.0496225	-2.3766	0.017473	0.404974
ENSMUSG00000036249	Rbm43	1318	908	1190	916	931	956	1150	952	980	937	1412	1075	1048.54	-0.117608	0.0603955	-1.9475	0.0514752	0.62665
ENSMUSG00000037419	Endod1	5990	4191	4891	4044	3881	3767	5186	4509	4180	4236	5584	4476	4528.01	-0.11755	0.0528215	-2.21336	0.0268726	0.487476
ENSMUSG00000073792	Alg6	523	463	544	457	470	377	486	405	500	513	567	399	473.885	-0.117481	0.0666804	-1.76869	0.076945	0.70329
ENSMUSG00000033454	Zbtb1	1767	1332	1715	1356	1277	1112	1557	1490	1351	1488	1614	1368	1441.25	-0.117333	0.0602199	-1.94481	0.0517981	0.628318
ENSMUSG00000076431	Sox4	267	253	328	233	246	208	234	220	250	220	249	288	250.228	-0.117308	0.0659208	-1.81195	0.0699946	0.686212
ENSMUSG00000037996	Slc24a2	33379	25669	31634	23736	25498	21405	27246	27335	27566	25350	30920	29311	27259.1	-0.117136	0.0587416	-2.00625	0.0448294	0.598074
ENSMUSG00000034912	Mdga2	1787	2010	2236	1867	1763	1565	1978	1668	1998	2100	2082	1794	1904.99	-0.116914	0.0637717	-1.80555	0.0709888	0.688872
ENSMUSG00000042429	Adora1	17120	13401	17644	12736	13441	12098	14664	16051	14286	14065	15757	15301	14639.3	-0.116913	0.0575025	-2.05102	0.0402652	0.579251
ENSMUSG00000049892	Rasd1	10195	5523	6730	6098	5497	6173	7026	7411	6763	4624	7644	7457	6702.77	-0.11675	0.0653504	-1.76834	0.0770042	0.70329
ENSMUSG00000069184	Zfp72	502	863	1005	883	614	547	572	684	889	935	620	690	742.521	-0.116702	0.067014	-1.64774	0.0994055	0.755926
ENSMUSG00000045318	Adra2c	1636	1031	1218	903	1046	1350	1086	1340	1157	996	1385	1321	1199.91	-0.11666	0.0654738	-1.78567	0.0741522	0.694777
ENSMUSG00000026610	Esrrg	601	653	734	678	538	425	550	479	657	731	561	601	603.732	-0.116614	0.0670654	-1.76063	0.0783017	0.705068
ENSMUSG00000037239	Spred3	2227	2138	2454	2017	2022	1829	2053	1898	2375	2287	2519	2110	2158.12	-0.116558	0.0616436	-1.90179	0.0571992	0.646867
ENSMUSG00000073096	Lrrc61	1231	749	925	699	813	641	939	850	876	755	1071	682	841.946	-0.116431	0.0644656	-1.76769	0.077112	0.70329
ENSMUSG00000021758	Ddx4	423	311	410	316	330	303	300	311	296	420	397	345	345.384	-0.11636	0.0670327	-1.77599	0.0757344	0.702149
ENSMUSG00000020696	Rffl	612	747	842	757	665	467	630	576	702	911	734	577	686.817	-0.11634	0.0668358	-1.70243	0.0886747	0.734342
ENSMUSG00000046079	Lrrc8d	2632	2195	2667	1891	1969	1724	2042	2352	2094	2294	2467	2250	2201.47	-0.116261	0.0614932	-1.91221	0.0558491	0.644878
ENSMUSG00000025221	Kcnip2	13451	12606	15584	12383	10681	10097	10874	13234	14504	12941	13398	13061	12726.8	-0.116242	0.0582714	-2.04682	0.0406757	0.582741
ENSMUSG00000022240	Ctnnd2	14195	11863	13621	9567	10222	11386	12975	13037	10603	11491	15160	12037	12062.6	-0.116148	0.0480417	-2.41662	0.0156651	0.387952
ENSMUSG00000053799	Exoc6	2397	1869	2028	1449	1676	1651	2038	2032	1570	1755	2417	1835	1871.16	-0.116085	0.0568818	-2.0337	0.0419821	0.586272
ENSMUSG00000038594	Cep85l	2454	2782	3632	2875	2045	1825	2308	2334	3007	3088	2408	2704	2628.93	-0.116085	0.0643108	-1.81267	0.0698825	0.686212
ENSMUSG00000034751	Mast4	3474	3221	3690	3213	3082	2533	3135	3178	3243	3515	3664	3309	3265.08	-0.116079	0.0601532	-1.93581	0.0528914	0.631601
ENSMUSG00000046159	Chrm3	8856	5407	6546	5089	5822	5409	6380	7106	6026	4333	7140	7233	6227.81	-0.11607	0.064303	-1.82217	0.0684287	0.685297
ENSMUSG00000025576	Rbfox3	26659	19310	24816	17180	19833	20285	21965	23256	19660	20152	27447	22871	21745.1	-0.116069	0.0517956	-2.24646	0.0246749	0.468643
ENSMUSG00000053877	Srcap	107	91	96	123	69	89	110	59	48	89	92	82	88.1084	-0.116051	0.0564939	-2.10799	0.0350318	0.551208
ENSMUSG00000044949	Ubtd2	228	247	298	253	210	244	198	241	241	259	251	262	245.649	-0.115989	0.0668686	-1.75239	0.0797075	0.710362
ENSMUSG00000056553	Ptprn2	14522	10926	11110	8717	11019	9131	11952	11194	9744	10663	14210	11006	11072.2	-0.115985	0.055814	-2.0606	0.039341	0.570159
ENSMUSG00000045216	Hs6st1	2512	2046	2734	1758	1979	1909	2163	2212	2096	2402	2561	2023	2183.51	-0.115951	0.0598186	-1.94626	0.0516235	0.626901
ENSMUSG00000020166	Cnot2	3658	2654	3343	2705	2547	2832	3417	3047	2538	2893	4008	2952	3013.95	-0.115916	0.053178	-2.17851	0.0293678	0.509805
ENSMUSG00000036862	Dchs1	777	801	885	837	792	655	1114	856	708	648	810	628	791.825	-0.115915	0.0670553	-1.79849	0.0720993	0.691154
ENSMUSG00000024030	Abcg1	3773	2780	3500	2600	2924	2648	3177	3157	2830	3092	3574	3210	3083.86	-0.115902	0.0583566	-1.99071	0.0465125	0.60639
ENSMUSG00000055660	Mettl4	270	243	368	200	224	197	287	209	174	256	241	227	239.75	-0.115852	0.0645824	-1.80629	0.0708728	0.688872
ENSMUSG00000003345	Csnk1g2	5328	4050	4815	3440	3902	4136	4255	4781	4463	3995	5133	4246	4351.95	-0.115838	0.0575367	-2.02669	0.0426943	0.590338
ENSMUSG00000052632	Asap2	4688	3049	3596	2868	3316	2748	3732	3573	3170	2858	4249	3528	3411.8	-0.115778	0.0599724	-1.91027	0.056099	0.644878
ENSMUSG00000020300	Cpeb4	7956	8258	10077	7950	7798	6427	8490	7223	8378	9791	8661	7903	8238.82	-0.115743	0.0617662	-1.85996	0.0628918	0.665686
ENSMUSG00000033233	Trim45	845	771	886	714	759	621	1011	907	473	661	1001	695	769.551	-0.115731	0.0668499	-1.79007	0.0734427	0.69383
ENSMUSG00000074968	Ano3	5485	4365	5119	4149	4425	3794	4584	4546	4472	5356	5329	4345	4640.44	-0.115647	0.0587683	-1.97926	0.0477866	0.611213
ENSMUSG00000022525	Hrasls	1643	1044	1323	1033	870	1267	1369	1267	893	1104	1627	1153	1197.81	-0.115622	0.0644387	-1.76675	0.0772701	0.703375
ENSMUSG00000038576	Susd4	7691	7199	7687	6068	6056	6208	7003	6978	6880	7073	8309	7018	6980.77	-0.115587	0.0532989	-2.17213	0.0298457	0.512942
ENSMUSG00000030469	Zfp719	1050	814	779	865	722	623	795	716	752	910	867	853	810.651	-0.11557	0.0665153	-1.74202	0.0815054	0.7171
ENSMUSG00000026179	Pnkd	15936	13760	15357	12433	12255	12260	13206	14909	14268	13396	16269	14476	13986.1	-0.115518	0.0543506	-2.14969	0.0315799	0.523046
ENSMUSG00000041695	Kcnj2	1239	1205	1652	971	1071	821	1042	1054	1097	1416	1052	1196	1149.9	-0.11545	0.0670191	-1.75628	0.0790401	0.707176
ENSMUSG00000061175	Fnip2	1151	1134	1443	1128	1191	740	1108	965	1282	1452	817	978	1124.22	-0.11539	0.0667701	-1.78576	0.0741386	0.694777
ENSMUSG00000049420	Tmem200a	3424	2115	2226	1849	1966	2024	2403	2563	2012	1891	2782	2398	2278.11	-0.115381	0.0620899	-1.8151	0.0695089	0.686212
ENSMUSG00000027079	Clp1	1176	942	1306	1004	855	1033	1046	1013	1118	1039	1252	1112	1069.75	-0.115255	0.0600136	-1.92758	0.053907	0.6347
ENSMUSG00000033342	Plppr5	2780	2284	2544	2198	1994	1937	2372	2320	2086	2306	2937	2439	2330.61	-0.115215	0.0573465	-2.01404	0.044005	0.596974
ENSMUSG00000021451	Sema4d	1757	1980	2596	2020	1990	1501	1881	1876	1923	2339	2111	2033	2002.86	-0.11508	0.064571	-1.73511	0.0827206	0.71896
ENSMUSG00000019927	Ube2d1	1544	1387	1430	1100	1116	1241	1437	1592	1346	1232	1359	1153	1324.05	-0.115058	0.0625188	-1.86151	0.0626725	0.665686
ENSMUSG00000057182	Scn3a	1267	1163	1478	978	1177	999	1178	1199	1063	1462	1343	1018	1188.13	-0.115024	0.0651729	-1.77236	0.0763341	0.70329
ENSMUSG00000021364	Elovl2	646	714	819	797	587	482	654	592	680	805	643	676	677.191	-0.114959	0.0668726	-1.70374	0.0884299	0.733647
ENSMUSG00000032899	Styk1	109	30	38	58	21	39	41	27	17	24	28	31	38.3221	-0.114947	0.0434222	-2.42275	0.0154036	0.386581
ENSMUSG00000049721	Gal3st1	179	203	203	169	185	136	128	180	223	161	194	113	173.978	-0.114929	0.063352	-1.90262	0.0570907	0.646867
ENSMUSG00000063535	Zfp773	212	172	292	181	172	150	161	149	183	181	169	227	187.66	-0.114924	0.0636072	-1.86915	0.0616018	0.661856
ENSMUSG00000030753	Thap12	4264	3275	4251	3169	2993	2931	3680	3669	3444	3616	4223	3350	3540.49	-0.114924	0.0526807	-2.18218	0.0290964	0.508686
ENSMUSG00000028843	Sh3bgrl3	5200	4154	4966	3979	3995	3705	4464	4730	4651	4057	4664	4537	4411.62	-0.114899	0.059884	-1.94057	0.0523104	0.629795
ENSMUSG00000000861	Bcl11a	9517	6673	7128	5531	6257	6308	7414	7488	6547	6024	8704	7323	7006.62	-0.114853	0.0558318	-2.04392	0.0409617	0.58285
ENSMUSG00000024976	Shoc2	3212	2587	3336	2270	2447	2654	3414	2666	2230	2823	3482	2786	2794.97	-0.114689	0.0587491	-1.96325	0.049617	0.617467
ENSMUSG00000059187	Fam19a1	6684	4390	5169	3985	4224	4899	5218	5278	4522	4452	6391	4997	4962.83	-0.114547	0.0558866	-2.03282	0.0420707	0.586324
ENSMUSG00000024064	Galnt14	476	591	653	480	605	684	639	535	468	565	852	499	585.202	-0.114537	0.0670677	-1.60194	0.10917	0.766333
ENSMUSG00000019785	Clvs2	2651	2189	2693	1883	1766	2221	2471	2420	2191	2177	2512	2304	2274.93	-0.114532	0.0540004	-2.12011	0.0339971	0.542883
ENSMUSG00000021567	Nkd2	438	414	607	277	316	382	478	358	410	378	397	347	397.663	-0.1145	0.0670618	-1.69836	0.0894393	0.735435
ENSMUSG00000039753	Fbxl5	6842	4719	6068	4506	4619	5037	5794	5319	5082	5172	6931	5348	5394.17	-0.114483	0.0511196	-2.23303	0.0255471	0.478563
ENSMUSG00000021130	Galnt16	22430	14857	17310	13927	14568	15051	18359	18213	15667	14063	19220	17577	16624.3	-0.114461	0.0557529	-2.04641	0.0407157	0.582741
ENSMUSG00000069372	Ctxn3	73	153	115	109	142	92	105	72	48	158	97	53	103.224	-0.114434	0.0511504	-2.31426	0.0206533	0.432904
ENSMUSG00000054364	Rhob	14869	10005	12445	9621	9585	11100	12694	13079	10594	10301	12425	11919	11468.7	-0.114391	0.0552641	-2.07256	0.038213	0.567003
ENSMUSG00000020728	Cep112	189	150	144	181	118	135	166	141	144	138	127	114	146.321	-0.114384	0.0624884	-1.84883	0.064482	0.669468
ENSMUSG00000027508	Pag1	3440	5090	6774	5954	4473	3434	4336	4152	5188	6341	4348	5054	4923.64	-0.114338	0.066423	-1.59639	0.110401	0.770168
ENSMUSG00000000127	Fer	1707	1331	1575	1132	1217	1117	1461	1435	1058	1356	1795	1352	1360.33	-0.114269	0.0612667	-1.86353	0.0623882	0.664708
ENSMUSG00000030610	Det1	297	291	405	296	282	278	267	322	342	318	317	267	307.529	-0.114264	0.0670635	-1.7198	0.0854693	0.727578
ENSMUSG00000049606	Zfp644	2808	2811	3102	2884	2711	2260	2781	2565	2776	3289	3206	2765	2828.49	-0.114211	0.0609686	-1.8626	0.0625187	0.664972
ENSMUSG00000058248	Kcnh1	2447	2164	2703	2467	2032	1815	2430	1849	2118	2841	3128	2085	2320.36	-0.114046	0.0593938	-1.9271	0.0539674	0.6347
ENSMUSG00000102312	Pcdha3	151	142	110	129	156	73	106	83	129	129	130	65	117.881	-0.113958	0.0572185	-2.00116	0.0453757	0.599274
ENSMUSG00000041995	Zbed3	587	701	854	677	678	540	608	576	877	750	648	592	679.176	-0.113914	0.0670695	-1.69881	0.0893554	0.735435
ENSMUSG00000063382	Bcl9l	3035	2767	3132	2577	2788	2284	3231	2750	2731	2936	2885	2688	2812.47	-0.113875	0.0629301	-1.81565	0.0694233	0.686212
ENSMUSG00000021590	Spata9	80	80	123	91	46	88	55	43	104	98	41	51	76.4189	-0.113853	0.0532622	-2.33294	0.0196514	0.423468
ENSMUSG00000030134	Rasgef1a	37195	25282	32468	22965	24461	27534	30270	31715	24876	25448	37923	29755	28794.1	-0.113809	0.052533	-2.16206	0.0306132	0.519189
ENSMUSG00000000632	Sez6	21649	13892	15592	13155	14312	13666	16891	18714	13975	12253	18389	16347	15589.2	-0.113762	0.0602937	-1.88327	0.0596643	0.654437
ENSMUSG00000037674	Rfx7	1426	1845	2323	1940	1708	1262	1702	1386	1848	2228	1734	1732	1769.67	-0.11369	0.0666991	-1.63808	0.101404	0.755926
ENSMUSG00000031284	Pak3	6905	5596	6638	5185	5498	5506	7005	5819	5433	6438	7318	5536	6024.94	-0.113682	0.0539001	-2.11459	0.0344653	0.546059
ENSMUSG00000045973	Slc25a51	6602	6233	7547	6125	5339	5210	6014	6196	6452	7000	6687	6588	6321.99	-0.113558	0.0564156	-2.02942	0.0424157	0.58783
ENSMUSG00000023845	Lnpep	710	667	1005	732	740	395	667	542	625	812	852	675	697.918	-0.113546	0.0670469	-1.6315	0.102786	0.755926
ENSMUSG00000046699	Slitrk4	1953	1847	2260	2024	1534	1460	2043	1802	1640	1872	2329	1872	1872.87	-0.11354	0.0615528	-1.82585	0.0678729	0.683542
ENSMUSG00000025375	Aatk	13904	11611	12398	10110	10764	10922	12095	13047	10938	10214	16590	11916	11924.5	-0.113513	0.0507196	-2.2486	0.0245379	0.467501
ENSMUSG00000057914	Cacnb2	5145	4007	4824	3622	3696	3396	4393	4273	3832	4011	4720	4585	4177.71	-0.113431	0.0583201	-1.95277	0.0508463	0.622851
ENSMUSG00000039835	Nhsl1	6182	4603	6082	4616	4412	4512	5919	5404	4908	5013	5424	5287	5163.87	-0.113396	0.0551729	-2.06755	0.0386822	0.568585
ENSMUSG00000048264	Dip2c	7708	5878	7150	5088	5497	5213	6680	6189	5845	5735	8017	6240	6199.81	-0.113357	0.0512615	-2.20807	0.0272391	0.491758
ENSMUSG00000063430	Wscd2	6121	4073	4654	3877	4235	4252	4548	5324	4193	3736	5590	5068	4603.02	-0.11328	0.0611645	-1.86553	0.0621077	0.663306
ENSMUSG00000041642	Kif21b	4115	5470	6705	4909	5047	3856	4166	3971	5451	6525	6264	4940	5120.51	-0.113271	0.0643769	-1.7195	0.085523	0.727578
ENSMUSG00000056427	Slit3	2189	1506	1662	1411	1734	1221	1573	1480	1394	1538	2485	1688	1634.6	-0.113242	0.0636137	-1.77379	0.0760984	0.70329
ENSMUSG00000056306	Sertm1	9465	6000	7450	5493	5362	6271	7028	7912	6614	5185	8066	6918	6739.42	-0.113233	0.0599419	-1.87795	0.0603885	0.655297
ENSMUSG00000060206	Zfp462	8211	6356	8131	6561	6100	6002	7143	7226	6601	7473	7643	7437	7038.09	-0.113225	0.0552181	-2.06509	0.0389148	0.568674
ENSMUSG00000063108	Zfp26	1253	1474	1655	1378	1165	955	1107	1006	1599	1781	1222	1241	1327.54	-0.11316	0.0669651	-1.75055	0.0800238	0.712138
ENSMUSG00000031931	Ankrd49	1394	1685	2165	1802	1232	1408	1307	1531	2036	2225	1430	1549	1658.68	-0.112882	0.0631	-1.82698	0.0677027	0.683044
ENSMUSG00000068740	Celsr2	16182	12782	14394	11511	12481	11999	13307	14496	12466	12541	17051	14448	13536.1	-0.112873	0.0529465	-2.14656	0.0318287	0.525799
ENSMUSG00000050967	Creg2	15972	10892	12950	9856	10390	11219	13330	13315	10334	10367	15516	12868	12103.6	-0.112801	0.0518864	-2.1672	0.0302199	0.516456
ENSMUSG00000039765	Cc2d2a	1435	1030	1225	1118	1102	988	1531	1159	931	1135	1669	916	1169.36	-0.112752	0.0616589	-1.86764	0.0618123	0.662088
ENSMUSG00000054894	Atp5s	560	534	570	511	496	407	605	489	386	525	690	485	516.902	-0.112728	0.0664237	-1.69557	0.0899675	0.736362
ENSMUSG00000026247	Ecel1	235	323	293	180	281	209	263	156	154	318	362	141	241.315	-0.112705	0.0600514	-1.97122	0.0486991	0.614275
ENSMUSG00000070639	Lrrc8b	5276	5156	5649	4528	4303	3958	4972	4487	4991	5136	5437	5163	4907.8	-0.112632	0.0601644	-1.87808	0.06037	0.655297
ENSMUSG00000033214	Slitrk5	6888	5036	6072	4412	4911	5049	6054	6078	5030	4989	6122	5819	5497.49	-0.112629	0.0552528	-2.04411	0.0409426	0.58285
ENSMUSG00000029211	Gabra4	3561	2594	3239	2040	2321	2458	2849	2544	2201	2839	4204	2359	2716.96	-0.112586	0.0631535	-1.78841	0.0737093	0.693833
ENSMUSG00000022283	Pabpc1	5190	5141	6124	4940	4967	4238	5204	5228	5022	5675	5748	5297	5222.27	-0.112549	0.0586107	-1.90923	0.0562318	0.64518
ENSMUSG00000002733	Plekha3	1494	1446	1660	1324	1096	1143	1361	1404	1465	1469	1637	1217	1385.74	-0.112544	0.0589935	-1.9089	0.0562748	0.64518
ENSMUSG00000005514	Por	8470	5568	6575	5843	5725	5554	8022	6542	5849	5699	7575	6252	6408.43	-0.112512	0.0544766	-2.06863	0.0385805	0.568338
ENSMUSG00000005045	Chd5	17366	14065	16018	11957	14183	13223	15574	15502	12684	13842	19497	15764	14831.4	-0.112506	0.0496623	-2.2685	0.0232986	0.457617
ENSMUSG00000029245	Epha5	18300	15089	17733	13253	15063	14019	16402	17242	13896	14694	20040	17337	15960	-0.112505	0.0518014	-2.18045	0.0292241	0.509805
ENSMUSG00000046574	Prr12	4555	3695	4225	3419	4009	3503	4370	4219	3556	3946	4815	3893	3992.32	-0.112495	0.056259	-1.99607	0.0459265	0.601327
ENSMUSG00000050538	B230217C12Rik	1407	1104	1106	963	919	1067	1232	1290	1014	953	1388	1000	1110.46	-0.112413	0.0622447	-1.80634	0.070865	0.688872
ENSMUSG00000069089	Cdk7	1147	951	1215	942	930	883	1014	1019	820	1057	1239	1171	1025.31	-0.112389	0.0636555	-1.78658	0.0740059	0.694476
ENSMUSG00000028064	Sema4a	863	969	1053	987	818	913	1081	911	804	953	1387	715	947.238	-0.112371	0.0664486	-1.66685	0.0955437	0.752964
ENSMUSG00000020605	Hs1bp3	2108	2700	3526	2690	2341	1814	2173	2307	2965	3239	2162	2553	2566.46	-0.112276	0.0662391	-1.68686	0.0916298	0.73978
ENSMUSG00000001089	Luzp1	9636	8821	10344	8576	8412	6874	8599	8445	8985	9440	9820	9681	8951.76	-0.112264	0.0607669	-1.86303	0.0624575	0.664708
ENSMUSG00000093536	Smim17	862	1044	1301	975	778	838	969	878	1055	1072	990	982	979.988	-0.112225	0.0648592	-1.68914	0.0911931	0.73978
ENSMUSG00000018415	Gid4	4167	4419	5520	4034	3843	3475	3740	3978	4580	5098	4555	4576	4332.96	-0.11221	0.0614394	-1.85309	0.06387	0.666908
ENSMUSG00000042211	Fbxo38	3680	2417	3072	2655	2536	2520	3157	2670	2616	2695	3916	2874	2865.89	-0.112187	0.0547733	-2.0408	0.0412712	0.583134
ENSMUSG00000038784	Cnot4	2309	1983	2522	1934	1921	1770	2192	1872	2065	2373	2280	2204	2111.61	-0.112131	0.0613259	-1.84295	0.0653356	0.67308
ENSMUSG00000022708	Zbtb20	21313	20912	27500	21660	19916	14442	21991	20503	22979	21073	18655	22552	21167.7	-0.112126	0.0654412	-1.72449	0.0846202	0.724092
ENSMUSG00000049872	Calhm5	754	617	684	531	566	498	715	673	538	585	580	610	610.285	-0.112125	0.0664673	-1.71303	0.0867071	0.728832
ENSMUSG00000050945	Zfp438	236	228	306	244	254	243	315	173	262	157	268	254	245.669	-0.112088	0.0636478	-1.84308	0.0653175	0.67308
ENSMUSG00000030103	Bhlhe40	13093	7723	9224	7077	8335	8156	9734	9807	7925	8099	10932	9446	9026.69	-0.112065	0.0583628	-1.88216	0.0598137	0.654437
ENSMUSG00000001103	Sebox	391	241	333	229	201	251	260	268	306	248	203	276	267.128	-0.112022	0.066129	-1.73747	0.0823049	0.717293
ENSMUSG00000039621	Prex1	4262	2942	3444	2750	2799	2845	3387	3216	2489	3403	4860	2917	3221.82	-0.112011	0.0589635	-1.90049	0.0573694	0.647562
ENSMUSG00000059456	Ptk2b	114901	73530	84939	64646	73880	74797	90953	96311	72385	63951	105788	85699	82427.8	-0.11189	0.0558638	-1.98949	0.0466469	0.606842
ENSMUSG00000053550	Shisa7	12369	10409	12274	10098	9499	8559	9938	11251	11091	10609	12530	11038	10754.6	-0.111877	0.0569907	-1.98995	0.0465959	0.606842
ENSMUSG00000005225	Plekha8	1823	2205	3165	2258	2012	1767	2004	1966	2705	2762	2340	1979	2253.8	-0.111858	0.0625844	-1.7383	0.0821574	0.717208
ENSMUSG00000043895	S1pr2	133	97	142	85	90	85	89	78	83	90	107	96	97.4415	-0.11179	0.0590775	-1.89211	0.0584766	0.650466
ENSMUSG00000040433	Zbtb38	3637	2984	3702	2685	2791	2891	3259	3025	3177	3089	3966	3294	3184.64	-0.111783	0.0536059	-2.09188	0.0364493	0.560466
ENSMUSG00000053985	Zfp14	531	439	518	406	470	424	529	398	451	475	658	364	467.674	-0.111766	0.0666768	-1.69644	0.0898017	0.735968
ENSMUSG00000035849	Krt222	3412	2846	3515	2703	2768	2662	2829	3209	2955	3056	3238	3432	3045.07	-0.111753	0.0604551	-1.88769	0.0590678	0.652606
ENSMUSG00000020272	Stk10	469	513	622	556	411	348	577	493	435	480	467	443	484.22	-0.111725	0.0670704	-1.64245	0.100496	0.755926
ENSMUSG00000020990	Cdkl1	606	551	564	463	610	398	568	589	463	578	567	445	532.683	-0.111586	0.0670418	-1.6485	0.0992503	0.755926
ENSMUSG00000022788	Fgd4	3197	3861	5138	4334	3300	2877	3893	3151	4063	4846	3228	3971	3843.3	-0.111408	0.06608	-1.66737	0.0954413	0.752807
ENSMUSG00000034656	Cacna1a	3525	2557	2687	2539	2560	2180	2594	2362	2801	2592	3855	2599	2711.73	-0.111379	0.0630579	-1.7769	0.0755844	0.701356
ENSMUSG00000036086	Zranb3	1383	956	1154	806	848	915	1067	1191	907	851	1148	1097	1017.12	-0.111358	0.0634111	-1.75558	0.0791597	0.707206
ENSMUSG00000058056	Palld	858	865	934	1023	666	651	939	978	763	933	703	778	843.439	-0.111324	0.0660919	-1.70458	0.0882727	0.733008
ENSMUSG00000036492	Rnf39	208	170	209	125	140	151	180	138	159	160	91	151	157.749	-0.111323	0.0607237	-1.96954	0.0488916	0.61467
ENSMUSG00000018809	Smyd4	750	452	616	561	426	470	551	569	443	527	755	482	542.358	-0.111318	0.0667498	-1.6458	0.099805	0.755926
ENSMUSG00000036591	Arhgap21	11414	9440	10627	8720	9267	7560	10468	9640	8665	9990	12932	9204	9727.5	-0.111291	0.0509753	-2.17827	0.029386	0.509805
ENSMUSG00000048351	Coa7	1977	1946	2263	1720	1653	1532	2004	1813	1743	1926	2142	1973	1881.91	-0.111275	0.0608616	-1.82188	0.0684739	0.685297
ENSMUSG00000048076	Arf1	30134	18197	21625	17194	17675	20136	23689	24169	18485	16633	27280	21591	21114.6	-0.111262	0.0570751	-1.92365	0.0543986	0.637385
ENSMUSG00000047712	Ust	4422	3071	3603	2680	2902	2707	3579	3753	3117	2492	3891	3461	3272.47	-0.111201	0.0603994	-1.84174	0.0655134	0.674048
ENSMUSG00000049583	Grm5	15020	12409	15337	11603	11671	11570	13821	13865	11294	13514	16578	13754	13249.9	-0.111179	0.0502676	-2.21618	0.0266794	0.486465
ENSMUSG00000039844	Rapgef1	6702	6456	7608	6031	6135	5363	6389	6234	6520	7402	7431	6457	6543.61	-0.111135	0.0574976	-1.93283	0.0532574	0.632848
ENSMUSG00000024867	Pip5k1b	3016	2034	2616	2049	1932	2017	3028	2281	2067	2143	2439	2398	2313.17	-0.111123	0.0576562	-1.95345	0.0507665	0.62236
ENSMUSG00000028926	Cdk14	9712	9377	10471	7607	7995	7871	9525	8501	7958	9950	11392	8948	9038.6	-0.111105	0.0562518	-1.96969	0.0488734	0.61467
ENSMUSG00000028360	Slc44a5	3254	4635	5608	4762	3584	3516	3876	4005	4869	5583	3478	4319	4330.6	-0.111089	0.0652838	-1.65019	0.0989048	0.755926
ENSMUSG00000036959	Bcorl1	2394	2226	2736	2008	2059	1781	2123	2142	2255	2286	2771	2295	2243.32	-0.111052	0.0589594	-1.89279	0.0583853	0.650466
ENSMUSG00000024901	Peli3	2488	1924	2325	1706	1586	1636	1852	1960	2051	1888	2200	2123	1965.7	-0.110778	0.0617079	-1.81413	0.0696576	0.686212
ENSMUSG00000042581	Thsd7b	888	834	1003	868	797	534	1044	759	855	792	670	734	816.176	-0.110741	0.0670131	-1.69721	0.0896568	0.735435
ENSMUSG00000024164	C3	345	225	331	356	208	325	441	213	273	182	328	236	287.292	-0.110719	0.0631834	-1.85633	0.0634068	0.665686
ENSMUSG00000036510	Cdh8	3920	3064	3651	2956	3096	2865	3535	3313	3210	3369	4145	3199	3334.67	-0.110641	0.0538921	-2.05408	0.039968	0.575766
ENSMUSG00000044709	Gemin7	467	376	490	389	305	414	471	407	390	373	439	395	407.755	-0.110616	0.0665856	-1.65514	0.0978954	0.755926
ENSMUSG00000024544	Ldlrad4	1115	1109	1417	1001	1049	689	953	972	1174	1097	1379	975	1071.01	-0.110572	0.06482	-1.69356	0.0903487	0.737445
ENSMUSG00000033730	Egr3	9967	7030	9062	6765	6539	6976	8184	7963	6832	7568	10981	7766	7857.75	-0.110542	0.0535027	-2.06359	0.0390569	0.568927
ENSMUSG00000030077	Chl1	11649	10197	11251	8874	9791	8584	10711	9952	9180	10716	13601	10313	10311.8	-0.110538	0.0525121	-2.1047	0.0353178	0.551938
ENSMUSG00000033579	Fa2h	456	560	772	653	561	368	500	498	746	551	535	490	561.927	-0.110427	0.0669365	-1.59234	0.111307	0.770274
ENSMUSG00000072875	Gpr27	5514	3775	5129	3451	3276	4278	4519	4921	3625	4014	5107	4432	4288.36	-0.110425	0.0578316	-1.90091	0.0573137	0.647333
ENSMUSG00000036357	Gpr101	679	619	729	662	681	670	555	599	594	1015	735	671	686.174	-0.11042	0.0668673	-1.72152	0.0851568	0.7263
ENSMUSG00000025189	Cnnm1	8131	6473	7333	5537	6112	6401	7001	7322	6293	6785	8509	6629	6822.08	-0.110365	0.0524206	-2.10868	0.0349719	0.551208
ENSMUSG00000021798	Ldb3	413	322	370	386	302	266	320	300	370	253	404	351	337.594	-0.110313	0.0660325	-1.69765	0.0895747	0.735435
ENSMUSG00000053684	BC048403	877	723	814	563	642	518	648	639	711	577	904	726	688.887	-0.110291	0.0664974	-1.6686	0.0951958	0.752472
ENSMUSG00000090236	Car15	82	61	96	64	50	86	42	45	40	66	92	42	63.5936	-0.110262	0.0498632	-2.28829	0.0221206	0.444485
ENSMUSG00000040479	Dgkz	44392	26666	31045	22555	25533	26599	30524	34248	27404	22775	38879	31007	29713.5	-0.110215	0.0598835	-1.80345	0.0713178	0.689184
ENSMUSG00000001802	Lrp3	3013	2123	2572	1793	1949	2155	2165	2401	2335	2184	2938	2157	2292.83	-0.110208	0.0611469	-1.8066	0.0708241	0.688872
ENSMUSG00000024044	Epb41l3	8212	7182	8253	6189	6890	6499	7868	7631	6429	7667	9255	7312	7389.83	-0.110208	0.0518998	-2.12145	0.0338835	0.542883
ENSMUSG00000000794	Kcnn3	1227	1602	1784	1655	1412	1301	1465	1329	1251	2192	1738	1458	1536.41	-0.110183	0.0653165	-1.62053	0.105119	0.758955
ENSMUSG00000028619	Tceanc2	1478	1285	1851	1545	1388	1244	1535	1355	1321	1747	1557	1622	1491.86	-0.110143	0.0637414	-1.72766	0.0840494	0.722595
ENSMUSG00000019256	Ahr	694	1110	1287	1199	912	678	749	897	1145	1334	658	988	986.834	-0.110109	0.0666403	-1.65508	0.0979074	0.755926
ENSMUSG00000044816	D630023F18Rik	344	321	349	262	325	307	263	276	245	452	350	286	315.152	-0.110058	0.0657954	-1.74666	0.0806959	0.714036
ENSMUSG00000068284	Usf3	6037	7376	9091	6780	6233	5363	5937	5944	7785	8637	6395	7473	6956.02	-0.110018	0.0649866	-1.70967	0.0873271	0.730425
ENSMUSG00000032528	Vipr1	1997	2105	2375	1835	1719	1870	1805	1858	2078	2414	2462	1932	2032.33	-0.110015	0.060804	-1.82148	0.0685339	0.685297
ENSMUSG00000030122	Ptms	45280	28967	36489	26645	29376	35285	38984	41888	26484	26476	42542	38363	34319.3	-0.109968	0.0579333	-1.90656	0.0565782	0.64562
ENSMUSG00000047085	Lrrc4b	6328	4655	5025	4069	4711	4691	5201	5462	4895	4188	6507	5013	5019.76	-0.109907	0.057083	-1.92831	0.0538162	0.6347
ENSMUSG00000044465	Fam160a2	6729	5093	6443	4532	5202	4921	5769	5692	5165	5488	7470	5487	5604.37	-0.109875	0.0515842	-2.13171	0.0330305	0.535305
ENSMUSG00000037622	Wdtc1	4818	4271	5148	3790	3892	3748	4314	4819	4235	4329	5089	4423	4381.67	-0.109872	0.053612	-2.0607	0.0393312	0.570159
ENSMUSG00000014837	4931428F04Rik	1577	1755	2418	1915	1658	1162	1526	1624	1958	2337	1673	1609	1773.19	-0.109837	0.065398	-1.66871	0.0951745	0.752472
ENSMUSG00000042507	Elmsan1	3202	3647	4377	3672	3119	2696	3354	3096	4040	4026	3496	3494	3529.22	-0.109807	0.063535	-1.7142	0.0864925	0.728832
ENSMUSG00000038518	Jarid2	5592	6603	8565	6752	6046	5124	5731	5794	7597	8354	5859	6724	6603.1	-0.109646	0.0646847	-1.70043	0.0890503	0.735435
ENSMUSG00000030303	Far2	1502	1610	1619	1508	1545	1147	1466	1427	1447	1702	1883	1439	1521.63	-0.10963	0.0630215	-1.71324	0.086668	0.728832
ENSMUSG00000074576	Mocs3	552	322	331	275	304	334	323	357	279	288	384	436	346.21	-0.109625	0.0666653	-1.62848	0.103424	0.755926
ENSMUSG00000061143	Maml3	646	791	1007	769	809	546	795	607	795	829	625	794	757.03	-0.109334	0.0663715	-1.62662	0.103818	0.755926
ENSMUSG00000066149	Cdc26	1250	769	1059	797	739	816	1040	887	783	810	1279	867	909.551	-0.109329	0.0632732	-1.70707	0.0878084	0.730816
ENSMUSG00000028747	Htr6	185	245	318	217	192	171	147	185	278	269	189	192	217.747	-0.109315	0.064924	-1.76338	0.0778361	0.704345
ENSMUSG00000027660	Skil	9555	7303	9771	7328	7139	6494	8173	7976	7889	8171	9128	8668	8079.06	-0.109183	0.0566484	-1.93876	0.0525307	0.630783
ENSMUSG00000041025	Iffo2	5296	6399	7877	6124	5362	4419	5196	5694	7131	6718	5635	6272	6038.93	-0.10906	0.0639366	-1.70768	0.0876965	0.730816
ENSMUSG00000041658	Rragb	4750	3635	4257	3274	3280	3984	4421	4355	3125	3779	5416	3674	3945.62	-0.109041	0.0567016	-1.92307	0.054471	0.637385
ENSMUSG00000013523	Bcas1	2889	3308	4427	3989	3202	2536	2986	3346	4235	3399	3793	3344	3467.1	-0.109027	0.0635323	-1.67383	0.0941648	0.748887
ENSMUSG00000022811	Zfp148	5204	4352	5497	4312	4006	3963	5032	4624	4132	5181	5379	4685	4664.15	-0.109022	0.0537442	-2.03187	0.0421665	0.586603
ENSMUSG00000026576	Atp1b1	103158	75210	91699	71498	69707	74699	91539	88199	74375	76521	100017	87831	82895.4	-0.108997	0.0480743	-2.26757	0.0233555	0.457878
ENSMUSG00000060336	Zfp937	191	135	196	156	180	143	149	147	129	189	114	160	158.684	-0.108969	0.0603971	-1.87511	0.0607769	0.657948
ENSMUSG00000024018	Ccdc167	259	154	214	153	144	104	118	124	151	172	262	104	160.204	-0.108956	0.0609974	-1.81929	0.068867	0.686212
ENSMUSG00000019066	Rab3d	2705	3889	4425	3570	3192	2439	2744	3168	3994	4290	2714	3573	3428.14	-0.108942	0.0668284	-1.63521	0.102006	0.755926
ENSMUSG00000027624	Epb41l1	27151	25290	29876	22995	22006	21108	23940	24853	25106	28654	30893	24650	25397.3	-0.108828	0.0520245	-2.10498	0.0352934	0.551938
ENSMUSG00000034282	Evpl	201	216	272	178	254	116	187	147	143	201	302	180	198.008	-0.108786	0.0628347	-1.66452	0.0960093	0.755051
ENSMUSG00000034390	Cmip	4074	3594	4055	2887	3536	2657	3468	3298	3128	3979	4878	3223	3527.03	-0.108764	0.0602399	-1.80552	0.0709933	0.688872
ENSMUSG00000033767	Tmem131l	1432	1013	1197	1061	981	891	1044	1047	1120	932	1443	1197	1104	-0.108739	0.0655344	-1.67769	0.0934083	0.747492
ENSMUSG00000036957	Lrfn3	977	641	663	533	772	685	592	831	580	712	806	740	708.673	-0.108712	0.067073	-1.63952	0.101106	0.755926
ENSMUSG00000064329	Scn1a	2714	2698	3152	1997	2504	2110	2814	2363	2442	2658	3143	2452	2569.42	-0.108679	0.0618224	-1.74007	0.0818472	0.7171
ENSMUSG00000028527	Ak4	6620	8565	10482	8169	6434	6816	7165	7895	8354	9405	8337	8379	8066.76	-0.108665	0.0573864	-1.83907	0.0659043	0.675778
ENSMUSG00000021591	Glrx	895	764	1223	832	688	720	804	718	1072	916	899	872	865.242	-0.108639	0.0636125	-1.73583	0.082594	0.71896
ENSMUSG00000022914	Brwd1	5426	4993	5962	4885	4472	4722	4836	5533	5181	5777	6187	5014	5229.1	-0.108583	0.0516839	-2.11653	0.0343	0.54581
ENSMUSG00000012640	Zfp715	1525	1322	1580	1343	1280	1002	1331	1317	1418	1497	1552	1274	1365.04	-0.108324	0.0625811	-1.73452	0.0828264	0.719195
ENSMUSG00000021256	Vash1	1377	1483	1996	1595	1279	873	1259	1258	1738	1743	1416	1311	1446.56	-0.108301	0.0659139	-1.6319	0.1027	0.755926
ENSMUSG00000036123	Slc9a3	56	92	73	53	76	32	32	23	45	31	27	54	51.1836	-0.108291	0.0414796	-2.73615	0.00621628	0.253435
ENSMUSG00000074305	Peak1	3613	3622	4552	3932	3383	2827	3621	3442	3804	4339	4715	3397	3753.13	-0.108218	0.0553599	-1.93699	0.0527464	0.631601
ENSMUSG00000030393	Zik1	1432	1626	1815	1308	1288	1306	1473	1353	1681	1725	1311	1464	1488.06	-0.108135	0.0660032	-1.66072	0.096769	0.755926
ENSMUSG00000060371	Caln1	17681	16849	20220	13245	15205	14571	16354	16500	14079	18112	22861	16326	16660.1	-0.108128	0.0562531	-1.92302	0.0544773	0.637385
ENSMUSG00000028246	Faxc	1478	1650	2086	1669	1487	1055	1630	1301	1409	2123	1737	1474	1587.45	-0.108127	0.0662127	-1.59723	0.110215	0.770168
ENSMUSG00000031631	Cfap97	2505	2038	2526	1979	1927	1755	2360	2270	1885	2135	2408	2316	2160.72	-0.10812	0.0600443	-1.80868	0.0705	0.687742
ENSMUSG00000050138	Kcnk12	208	144	217	101	160	149	124	164	173	149	148	107	153.585	-0.108039	0.0607766	-1.81997	0.0687634	0.686212
ENSMUSG00000071226	Cecr2	1249	1586	2079	1776	1445	1183	1341	1304	1935	1791	1237	1762	1575.07	-0.107978	0.0670641	-1.6318	0.102721	0.755926
ENSMUSG00000024393	Prrc2a	21481	17343	19769	15551	18032	15722	20448	18579	16786	18469	23413	17810	18458.8	-0.107949	0.0506823	-2.1267	0.0334447	0.539728
ENSMUSG00000038172	Ttc39b	2624	2161	2588	1995	2289	1886	2301	2262	1988	2389	3209	2305	2309.32	-0.107915	0.0568075	-1.90549	0.0567167	0.645799
ENSMUSG00000028233	Tgs1	2874	2432	3004	2628	2222	1954	2540	2254	2627	3017	3017	2468	2573.19	-0.107858	0.0590572	-1.83624	0.0663218	0.677774
ENSMUSG00000039037	St6galnac5	26918	20188	25242	17490	18560	20381	24324	24876	19489	18680	26976	23210	21956.9	-0.107791	0.0496278	-2.17593	0.0295608	0.509965
ENSMUSG00000030990	Pgap2	755	846	1039	997	742	622	830	798	859	1068	693	818	844.397	-0.107772	0.0668629	-1.61113	0.10715	0.762793
ENSMUSG00000038544	Inip	1870	1573	1956	1551	1429	1637	1702	1735	1512	1868	1922	1865	1710.73	-0.107713	0.0575779	-1.88313	0.059683	0.654437
ENSMUSG00000040412	5330417C22Rik	2662	2445	2917	2314	2378	2007	2254	2338	2606	3004	2823	2427	2509.67	-0.107659	0.0618531	-1.76975	0.0767693	0.70329
ENSMUSG00000001143	Lman2l	3193	2679	3283	2605	2349	2377	3127	2989	2754	2669	3209	2732	2811.2	-0.10763	0.0545246	-1.97699	0.0480425	0.611881
ENSMUSG00000090125	Pou3f1	9138	4554	5425	4133	4423	5386	6047	7481	5116	2928	6254	6025	5503.47	-0.107626	0.0667129	-1.62223	0.104754	0.758115
ENSMUSG00000054720	Lrrc8c	1949	1581	1757	1637	1456	1488	1673	1627	1585	1975	1711	1775	1682.32	-0.107596	0.0618906	-1.76536	0.077503	0.704172
ENSMUSG00000064370	mt-Cytb	44783	58748	70190	53400	49448	44535	46012	51135	61669	61200	61958	56943	55111.8	-0.107577	0.0586583	-1.79035	0.0733983	0.69383
ENSMUSG00000041372	B4galnt3	148	121	115	135	99	92	84	104	114	134	82	93	111.345	-0.107563	0.0583241	-1.93468	0.0530297	0.631601
ENSMUSG00000062794	Zfp599	479	608	750	549	512	486	530	506	482	612	557	711	566.951	-0.107456	0.0670573	-1.59114	0.111579	0.770643
ENSMUSG00000103088	Pcdhgb6	445	385	393	424	508	363	538	425	317	488	407	322	419.047	-0.107447	0.06626	-1.64494	0.0999818	0.755926
ENSMUSG00000004110	Cacna1e	22266	19487	21751	15716	18214	18378	20188	21146	17029	19391	26356	20471	19848.6	-0.107432	0.0484846	-2.21924	0.0264704	0.485245
ENSMUSG00000061410	Zcchc14	9980	8516	10145	7782	7497	6828	8376	8927	9286	8860	9502	8496	8644.16	-0.107413	0.0565938	-1.91581	0.0553893	0.643251
ENSMUSG00000029196	Tada2b	2677	2259	2962	2246	1955	1801	2241	2199	2395	2828	2533	2318	2356.3	-0.107392	0.0605353	-1.79446	0.0727396	0.69383
ENSMUSG00000053199	Arhgap20	2815	2405	2917	1882	2311	2047	2547	2184	2107	2494	3675	2288	2437.08	-0.107343	0.0601377	-1.79123	0.0732567	0.69383
ENSMUSG00000025658	Cnksr2	36444	24358	28692	20842	25005	22633	27490	28559	25066	22458	35906	27819	26764.9	-0.10733	0.0557993	-1.9102	0.0561071	0.644878
ENSMUSG00000040035	Disp2	25971	19526	21926	17199	18994	17740	21218	23274	18937	18050	25780	21881	20686.4	-0.107315	0.0543772	-1.98081	0.0476121	0.610265
ENSMUSG00000018589	Glra2	440	294	393	263	278	308	307	273	319	302	548	222	323.01	-0.107275	0.0662506	-1.68476	0.0920358	0.741978
ENSMUSG00000040761	Spen	1722	1618	1937	1461	1843	1225	1762	1330	1581	1631	2830	1417	1672.62	-0.107246	0.0618296	-1.73775	0.0822554	0.717293
ENSMUSG00000066607	Insyn1	5694	4187	4940	3675	4046	4270	4544	5090	4432	4428	5367	4424	4558.63	-0.107132	0.057459	-1.8726	0.0611237	0.659356
ENSMUSG00000023977	Ubr2	3334	2798	3644	2610	2804	2262	3052	2538	3181	3347	3629	2647	2965.84	-0.107007	0.0596384	-1.80179	0.0715777	0.690506
ENSMUSG00000021457	Syk	280	281	350	299	201	190	305	221	255	241	250	262	260.992	-0.106894	0.0657101	-1.61639	0.10601	0.76138
ENSMUSG00000039219	Arid4b	3144	2715	3273	3078	2373	2170	3010	2655	2694	3283	3644	2552	2859.36	-0.106818	0.054683	-1.94784	0.0514337	0.62665
ENSMUSG00000031902	Nfatc3	1290	2004	2282	1950	1667	1358	1588	1462	2032	2222	1668	1783	1791.31	-0.106812	0.0668683	-1.49731	0.134312	0.807946
ENSMUSG00000028211	Trp53inp1	1867	2655	3345	2965	2351	1880	2379	1988	3197	3179	2009	2478	2554.35	-0.106795	0.0670668	-1.54964	0.121227	0.785736
ENSMUSG00000036304	Zdhhc23	752	721	862	747	716	439	741	604	740	750	647	699	703.173	-0.106733	0.0669611	-1.58236	0.113567	0.772188
ENSMUSG00000027495	Fam210b	3282	2150	2835	2411	2105	2358	2880	2857	2363	2461	2666	2654	2568.53	-0.106726	0.0595115	-1.79873	0.0720608	0.691148
ENSMUSG00000040061	Plcb2	117	109	115	102	98	127	111	142	73	86	73	94	105.012	-0.106694	0.0574817	-1.96495	0.0494198	0.617467
ENSMUSG00000021143	Pacs2	4873	5273	6233	5022	5091	4073	5123	5054	5605	5578	5891	4985	5230.99	-0.10644	0.0599857	-1.74236	0.0814461	0.7171
ENSMUSG00000054520	Sh3bp2	286	199	342	260	190	140	238	188	243	154	305	198	225.866	-0.106439	0.0639622	-1.63002	0.103097	0.755926
ENSMUSG00000022827	Rabl3	812	788	922	850	730	626	832	853	747	951	767	738	801.941	-0.106364	0.0655728	-1.62759	0.103612	0.755926
ENSMUSG00000021182	Ccdc88c	3267	2680	2843	2507	2666	2427	2937	2942	3039	2345	3153	2788	2792.29	-0.106322	0.0628872	-1.7077	0.0876911	0.730816
ENSMUSG00000042256	Ptchd4	207	293	410	260	297	221	228	212	345	329	218	253	276.251	-0.106304	0.0637233	-1.65903	0.0971098	0.755926
ENSMUSG00000020273	Papolg	1284	1024	1269	1055	1069	890	1013	1023	832	1343	1758	1054	1118.57	-0.106267	0.0641825	-1.70492	0.0882089	0.732813
ENSMUSG00000024958	Gpr137	2786	2270	2903	2368	2200	2371	2372	2640	2650	2619	3158	2405	2548.55	-0.106204	0.0564402	-1.90178	0.0572004	0.646867
ENSMUSG00000050379	Sept6	12786	8428	9069	6954	7437	8023	9359	9853	7978	7408	11550	9452	8907.45	-0.106168	0.0572843	-1.82335	0.0682507	0.685297
ENSMUSG00000070304	Scn2b	37164	29368	35015	25593	27492	27085	33437	33181	27812	28605	39039	32613	31053	-0.106128	0.0483213	-2.19891	0.027884	0.49701
ENSMUSG00000032727	Mier3	1943	2259	2456	2104	1869	1617	2114	1749	2110	2635	2012	2064	2083.23	-0.105955	0.0657198	-1.60725	0.108	0.765168
ENSMUSG00000067028	Cntnap5b	195	231	207	187	213	118	168	78	136	234	199	179	179.71	-0.105917	0.0566789	-1.95594	0.050472	0.621184
ENSMUSG00000019890	Nts	161	67	79	243	140	195	150	139	54	178	132	93	137.961	-0.105877	0.0554399	-1.73944	0.081957	0.7171
ENSMUSG00000030768	Disp1	240	295	360	310	318	253	217	216	328	337	297	339	295.7	-0.105807	0.0655758	-1.65859	0.0971987	0.755926
ENSMUSG00000042439	Zfp532	5539	5327	6573	5124	4838	4457	4836	5219	6076	6149	5772	5545	5453.58	-0.105695	0.0594352	-1.81256	0.0698994	0.686212
ENSMUSG00000033209	Ttc28	455	623	838	647	580	460	565	509	547	858	517	587	602.823	-0.105602	0.0666812	-1.53452	0.124902	0.790753
ENSMUSG00000055817	Mta3	3057	2689	3054	2220	2575	2220	3060	2559	2377	2830	3338	2606	2692.01	-0.105595	0.0588601	-1.79147	0.0732183	0.69383
ENSMUSG00000039457	Ppl	273	398	485	303	325	239	281	234	404	425	316	277	332.173	-0.105584	0.0648631	-1.6183	0.105598	0.759769
ENSMUSG00000050071	Bex1	3224	1937	2299	1902	2109	2864	2631	3137	1671	1818	3182	2691	2428.38	-0.105579	0.0646136	-1.643	0.100382	0.755926
ENSMUSG00000041911	Dlx1	629	680	672	1170	951	688	898	861	573	853	781	763	802.952	-0.105512	0.066308	-1.43714	0.150678	0.828179
ENSMUSG00000056966	Gjc3	853	809	1024	955	638	574	870	727	965	807	949	665	816.621	-0.105502	0.0657509	-1.58822	0.112236	0.770643
ENSMUSG00000028463	Car9	165	109	116	102	151	153	196	130	75	76	135	111	126.292	-0.105488	0.0593196	-1.89347	0.058295	0.650466
ENSMUSG00000024695	Zfp91	6593	5890	7381	6009	5189	4800	6442	5777	5915	6797	6960	6129	6122.39	-0.105464	0.0551155	-1.9128	0.0557734	0.644878
ENSMUSG00000020261	Slc36a1	2969	2856	3262	2688	2427	2104	2626	2734	2983	2989	2893	2819	2776.12	-0.105453	0.0617463	-1.72605	0.0843384	0.723695
ENSMUSG00000038048	Cntnap5c	394	312	281	270	314	232	253	285	282	293	253	329	293.133	-0.105452	0.0642244	-1.69221	0.090606	0.737618
ENSMUSG00000021536	Adcy2	11499	8005	9751	7444	7837	7802	9625	10406	7716	7371	11652	9122	8906.53	-0.105413	0.0554986	-1.90177	0.0572015	0.646867
ENSMUSG00000033863	Klf9	14500	13237	16982	13418	12610	10293	13975	12998	13935	15560	13837	14456	13794.5	-0.105363	0.0612944	-1.73021	0.0835924	0.721415
ENSMUSG00000028931	Kcnab2	97491	65150	76650	58255	64073	66179	78942	85360	67946	55840	87419	78597	72756.6	-0.105331	0.0571895	-1.84557	0.0649552	0.67211
ENSMUSG00000113450	Gm49359	181	142	159	197	143	125	155	183	122	171	98	126	151.642	-0.105274	0.0607261	-1.83095	0.0671073	0.680846
ENSMUSG00000094910	D430019H16Rik	26751	23081	27928	20942	21312	20335	23531	25641	22560	25766	27239	24604	24009	-0.105184	0.0533246	-1.98755	0.0468612	0.608096
ENSMUSG00000060733	Ipmk	3350	3350	3942	2998	3059	2749	3241	3626	3270	3699	3632	3138	3329.6	-0.105133	0.0579575	-1.81385	0.0697006	0.686212
ENSMUSG00000033770	Clcnka	151	65	91	20	71	82	83	6	7	16	29	97	59.7991	-0.10509	0.0381366	-3.83702	0.000124536	0.0277198
ENSMUSG00000005621	Zfp592	2131	2490	3038	2246	2017	1645	2066	2076	2438	2892	2402	2207	2303.58	-0.105069	0.0639649	-1.63115	0.102859	0.755926
ENSMUSG00000052726	Kcnt2	692	454	594	456	505	447	480	491	496	559	700	503	526.236	-0.105054	0.0665087	-1.58808	0.112268	0.770643
ENSMUSG00000050677	Ccdc96	532	403	601	523	374	465	688	485	352	476	465	454	482.012	-0.105013	0.0670438	-1.64003	0.100999	0.755926
ENSMUSG00000002803	Btbd6	2664	1944	2325	1636	1741	1925	2261	2428	1895	1879	2504	1975	2075.92	-0.104998	0.057433	-1.82529	0.0679578	0.683542
ENSMUSG00000044072	Eml6	2773	3205	4419	3274	3012	2258	2809	2854	3550	3972	3293	3162	3220.34	-0.104842	0.0639371	-1.61258	0.106835	0.762596
ENSMUSG00000048109	Rbm15	580	501	723	542	475	430	587	615	474	518	591	531	544.037	-0.104807	0.066607	-1.56948	0.116536	0.779378
ENSMUSG00000028799	Zfp362	2664	3209	3483	3076	2760	2368	2357	3011	3638	3522	2290	3183	2997.21	-0.104795	0.0667482	-1.66872	0.0951731	0.752472
ENSMUSG00000042121	Ssh1	2086	2638	2925	2413	2289	1811	2134	2078	2791	3042	2023	2418	2407.65	-0.104776	0.06683	-1.586	0.112738	0.770643
ENSMUSG00000035310	Lin54	960	788	937	727	735	517	824	771	770	755	740	817	776.115	-0.104697	0.0669883	-1.56613	0.117319	0.780357
ENSMUSG00000078794	Dact3	8003	6587	7294	5558	5562	6473	6169	6954	6893	6551	8314	6994	6737.96	-0.104676	0.0565094	-1.87959	0.0601641	0.654437
ENSMUSG00000024873	Cnih2	13525	9032	10946	9091	8259	9090	9620	12132	10949	8074	10479	11100	10147	-0.104652	0.0637073	-1.68769	0.0914704	0.73978
ENSMUSG00000038665	Dgki	1604	900	1043	964	1133	886	1123	1075	1045	877	1488	1126	1093.07	-0.104598	0.0659953	-1.54175	0.123134	0.787252
ENSMUSG00000026994	Galnt3	447	605	881	721	526	501	489	544	663	803	417	725	618.158	-0.104588	0.0667094	-1.61013	0.107369	0.763231
ENSMUSG00000070880	Gad1	2834	2736	4344	4496	3206	2653	4110	3478	3119	3509	4135	2555	3421.38	-0.104573	0.0661623	-1.50622	0.132011	0.803442
ENSMUSG00000024245	Tmem178	1834	1217	1583	1139	1149	1245	1467	1507	1180	1278	1651	1476	1378.23	-0.104544	0.0611348	-1.70131	0.0888857	0.735354
ENSMUSG00000025571	Tnrc6c	17037	26102	36010	26574	27223	15595	16523	16499	24737	27676	18028	20835	23123.2	-0.104441	0.0559345	-1.82152	0.0685283	0.685297
ENSMUSG00000036819	Jmjd4	1386	1138	1409	1209	1184	1011	1233	1207	1245	1470	1318	1196	1248.19	-0.104431	0.0635893	-1.65887	0.0971422	0.755926
ENSMUSG00000038056	Kmt2c	3685	3515	3530	3171	2997	2855	3565	2923	3381	3584	4103	3373	3375.99	-0.104345	0.0608486	-1.71691	0.0859963	0.728744
ENSMUSG00000031605	Klhl2	23226	15133	20536	15075	15108	16421	19447	21128	16284	14776	21581	18618	17913.2	-0.104329	0.0571183	-1.82911	0.0673826	0.682122
ENSMUSG00000025578	Cbx8	684	442	495	445	511	415	559	485	389	509	655	505	502.297	-0.104296	0.0661015	-1.55844	0.119128	0.782538
ENSMUSG00000026430	Rassf5	1547	1877	2285	1907	1537	1516	1530	1644	2027	2352	1894	1791	1831.69	-0.104247	0.06235	-1.6661	0.0956943	0.753443
ENSMUSG00000034297	Med13	3489	3341	4548	3152	3299	2721	3454	2898	3260	4453	4007	3480	3491.93	-0.104222	0.0633993	-1.64816	0.0993189	0.755926
ENSMUSG00000023032	Slc4a8	5272	3816	4625	3614	4155	3696	4232	4336	3907	4175	5550	4583	4291.81	-0.104214	0.0567677	-1.84433	0.0651346	0.672659
ENSMUSG00000020640	Itsn2	5012	4961	5958	4946	4571	3777	4958	4399	5391	5651	5194	5053	4988.51	-0.1041	0.0623035	-1.67533	0.0938692	0.748166
ENSMUSG00000026458	Ppfia4	6877	5539	6665	4685	5300	4932	6536	5998	5584	5172	7370	5757	5808.02	-0.104049	0.0502529	-2.07043	0.038412	0.56718
ENSMUSG00000054967	Zfp647	187	124	169	94	101	99	158	157	93	109	59	77	118.578	-0.104043	0.0569573	-2.05752	0.0396361	0.572018
ENSMUSG00000039153	Runx2	1254	1294	1716	1363	1342	969	1306	1276	1479	1463	873	1427	1326.49	-0.103934	0.0666763	-1.63965	0.101079	0.755926
ENSMUSG00000018363	Smurf2	2280	2628	3007	2749	1963	1786	2435	2132	2434	3259	2503	2313	2457.93	-0.10393	0.0631644	-1.6214	0.104931	0.758196
ENSMUSG00000035024	Ncapd3	764	710	818	650	680	632	706	702	672	730	911	753	723.654	-0.103858	0.0637109	-1.63435	0.102185	0.755926
ENSMUSG00000029478	Ncor2	9203	7454	8541	6977	8243	6749	8065	7959	8352	7707	9082	8523	8051.33	-0.103795	0.0610155	-1.7117	0.0869522	0.729314
ENSMUSG00000040811	Eml2	13734	8768	10229	7944	8673	9510	11185	11412	9116	8085	13004	9886	10001.6	-0.103722	0.0559669	-1.83695	0.0662175	0.677143
ENSMUSG00000021676	Iqgap2	17091	10600	13538	10975	11927	10553	13944	13559	12517	10469	14019	13727	12647.1	-0.103717	0.0613816	-1.68689	0.0916236	0.73978
ENSMUSG00000054115	Skp2	575	814	853	660	593	417	507	548	868	765	543	610	652.591	-0.103626	0.0664866	-1.5918	0.11143	0.770383
ENSMUSG00000028039	Efna3	4586	3602	4520	3570	3494	3903	3937	4658	4047	3736	4217	4438	4049.89	-0.103615	0.0592979	-1.78142	0.0748435	0.698861
ENSMUSG00000070002	Ell	1286	1188	1495	1212	1157	925	1277	1143	1222	1385	1484	1138	1235.99	-0.103591	0.0616856	-1.66838	0.0952412	0.752472
ENSMUSG00000056476	Med12l	1006	1091	1552	985	1069	753	1077	773	1216	1333	1324	915	1086.15	-0.103524	0.0665731	-1.54038	0.123468	0.787436
ENSMUSG00000027577	Chrna4	953	1012	1224	761	902	815	908	927	840	1032	1371	884	959.376	-0.103498	0.0642792	-1.60041	0.109507	0.766676
ENSMUSG00000025202	Scd3	86	68	100	76	96	74	73	49	60	86	88	70	77.4447	-0.103491	0.0556531	-1.88007	0.0600979	0.654437
ENSMUSG00000050064	Zfp697	2675	2379	3109	2166	2192	1822	2119	2270	2261	2835	3056	2485	2428.17	-0.103349	0.0625422	-1.68597	0.0918022	0.740621
ENSMUSG00000001627	Ifrd1	1823	1077	1296	970	999	1137	1465	1437	1077	1011	1428	1207	1227.57	-0.103334	0.0623306	-1.62245	0.104706	0.758115
ENSMUSG00000036377	C530008M17Rik	3423	2940	2974	2612	2906	2518	3155	2863	2833	2923	3319	3216	2965.08	-0.103272	0.0618799	-1.67543	0.0938505	0.748166
ENSMUSG00000032517	Mobp	15006	14335	20501	19208	14762	13684	17288	15298	20031	15650	17686	16221	16672.9	-0.103249	0.0628667	-1.61137	0.107099	0.762793
ENSMUSG00000026112	Coa5	4292	4418	5555	4463	3993	3461	4323	4032	4883	5339	4646	4367	4481.2	-0.103209	0.0609016	-1.69254	0.090543	0.737445
ENSMUSG00000018501	Ncor1	12364	9943	12036	9562	10336	8479	11575	9924	9785	11297	12804	11280	10705.5	-0.103168	0.0572233	-1.80498	0.0710779	0.689184
ENSMUSG00000026821	Ralgds	8172	8712	10589	8236	7719	6665	7309	8284	10559	10028	7949	8366	8585.9	-0.103137	0.06328	-1.68006	0.0929464	0.746899
ENSMUSG00000001985	Grik3	1326	1955	2288	1939	1841	1507	1905	1514	1562	2422	2325	1646	1851.13	-0.103074	0.0665302	-1.40875	0.15891	0.836266
ENSMUSG00000027584	Oprl1	2895	2646	3273	2293	2284	2593	2894	2603	2378	2787	3714	2731	2729.24	-0.102988	0.0569503	-1.80134	0.0716499	0.690579
ENSMUSG00000044550	Tceal3	10642	6826	7850	6168	6379	7944	8216	8996	6494	6361	10024	8652	7786.13	-0.102961	0.0573002	-1.78498	0.0742644	0.695115
ENSMUSG00000057455	Rit2	3652	2896	3567	2522	2573	2992	3281	3339	2493	3109	4364	2895	3097.86	-0.102902	0.058287	-1.76901	0.0768917	0.70329
ENSMUSG00000052676	Zmat1	954	927	1011	914	763	697	819	838	940	1024	958	891	894.28	-0.102845	0.0649932	-1.6037	0.10878	0.766333
ENSMUSG00000056383	AI987944	447	295	357	410	355	307	392	400	254	377	510	309	363.984	-0.102744	0.0670612	-1.535	0.124784	0.790753
ENSMUSG00000027678	Ncoa3	2767	2936	3562	3194	2854	2193	2514	2742	3485	3471	3001	3035	2992.93	-0.102672	0.0645735	-1.61439	0.106444	0.76138
ENSMUSG00000024212	Mllt1	3860	3073	3875	2872	2876	2716	3248	3352	3214	3593	3680	3279	3282.61	-0.102651	0.0576995	-1.79298	0.0729766	0.69383
ENSMUSG00000057637	Prdm2	4817	4244	4682	3912	4051	3376	4566	3614	4042	4562	4903	4738	4273.56	-0.102599	0.0625748	-1.65474	0.0979765	0.755926
ENSMUSG00000043587	Pxylp1	988	976	995	758	893	836	902	925	956	980	1114	824	926.317	-0.102569	0.0647773	-1.58425	0.113136	0.770643
ENSMUSG00000020486	Sept4	5662	3564	4421	3275	3575	3794	4929	4618	3845	2925	6017	3687	4121.1	-0.102567	0.0601919	-1.70912	0.0874285	0.730447
ENSMUSG00000000085	Scmh1	2338	2347	2654	2168	2019	1936	2142	2331	2425	2706	2396	2228	2307.43	-0.102547	0.0607207	-1.70805	0.0876275	0.730816
ENSMUSG00000028664	Ephb2	1971	1738	2113	1554	1437	1381	1654	1742	1874	1595	2303	1627	1732.9	-0.102458	0.0593973	-1.73925	0.0819915	0.7171
ENSMUSG00000029651	Mtus2	3737	3747	3995	3456	3427	2866	3507	3383	3543	3948	4153	3893	3631.53	-0.102416	0.0615156	-1.6682	0.0952752	0.752472
ENSMUSG00000046567	4930430F08Rik	514	396	447	366	393	450	448	439	385	365	499	518	433.454	-0.102306	0.0664984	-1.55593	0.119725	0.783523
ENSMUSG00000015599	Ttbk1	10055	11233	14395	10884	10152	7829	9784	9401	11350	13389	12233	11445	11001	-0.102296	0.0628047	-1.61893	0.105461	0.759337
ENSMUSG00000051224	Tceanc	121	94	129	100	84	79	106	76	65	126	78	77	94.5409	-0.102254	0.0574351	-1.85807	0.0631595	0.665686
ENSMUSG00000026235	Epha4	43626	31701	40079	29959	31674	29724	37707	36536	33096	31185	44787	37845	35285.8	-0.102234	0.0522066	-1.96044	0.0499439	0.618692
ENSMUSG00000038517	Tbkbp1	4172	4357	5041	4106	3765	3614	3842	4401	5209	4521	4540	4054	4308.69	-0.102231	0.0600406	-1.72607	0.0843346	0.723695
ENSMUSG00000075224	Lrrc55	426	410	536	259	323	338	395	211	353	512	366	318	369.309	-0.10219	0.0631959	-1.73018	0.0835984	0.721415
ENSMUSG00000041729	Coro2b	12356	10523	12186	9853	9622	9836	12208	12686	10050	10795	12681	10743	11055.8	-0.10218	0.0511516	-2.00295	0.0451832	0.598464
ENSMUSG00000014813	Stc1	568	845	1467	836	827	647	732	629	1126	1318	564	696	864.491	-0.10212	0.065519	-1.5816	0.11374	0.772891
ENSMUSG00000024957	Kcnk4	266	204	299	166	227	164	166	140	203	254	231	230	211.977	-0.102111	0.0623662	-1.72321	0.0848505	0.725382
ENSMUSG00000058006	Mdn1	2074	1816	2580	2135	2109	1543	1801	1664	1940	2452	3292	2036	2097.67	-0.102094	0.0606121	-1.72178	0.0851097	0.726238
ENSMUSG00000026018	Ica1l	2210	1783	1948	1481	1628	1785	1824	1892	1651	1971	2202	1930	1847.05	-0.102035	0.0599582	-1.71179	0.086936	0.729314
ENSMUSG00000003746	Man1a	5305	3678	4119	3660	3104	3066	4860	4225	3469	3279	4726	3776	3888.17	-0.101981	0.0575543	-1.76055	0.0783153	0.705068
ENSMUSG00000075324	Fign	128	199	322	219	185	228	144	153	187	347	106	225	207.699	-0.101937	0.0593897	-1.8595	0.0629557	0.665686
ENSMUSG00000032290	Ptpn9	3129	2956	3562	2988	2536	2658	3000	2885	3248	3490	3053	3200	3059.42	-0.101919	0.0594603	-1.73324	0.0830534	0.720239
ENSMUSG00000021209	Ppp4r4	5391	3449	4235	3360	3498	3691	4228	4410	3748	3586	4602	4349	4011.52	-0.101908	0.0589582	-1.72247	0.084984	0.725504
ENSMUSG00000051950	B3glct	871	783	893	826	699	760	859	735	746	1087	938	739	825.384	-0.101897	0.0644025	-1.59542	0.110617	0.770168
ENSMUSG00000049649	Gpr3	211	292	354	317	242	194	201	252	323	318	260	237	269.09	-0.101853	0.0664539	-1.51448	0.129904	0.799115
ENSMUSG00000033237	Arid2	2119	2377	2807	2169	2049	1765	2145	2009	2423	2545	2560	2285	2268.79	-0.101829	0.0626431	-1.60824	0.107782	0.764869
ENSMUSG00000057219	Armc7	872	587	565	571	684	466	527	674	588	513	767	669	620.922	-0.101764	0.0668831	-1.5236	0.127608	0.796455
ENSMUSG00000072774	Zfp951	96	102	130	92	39	83	91	87	69	71	48	89	83.5073	-0.101743	0.0567923	-1.75931	0.0785247	0.705178
ENSMUSG00000046032	Snx12	6083	3883	4910	3679	3918	4206	5293	5200	3615	3885	5653	4829	4535.89	-0.101613	0.0568133	-1.78277	0.0746243	0.69741
ENSMUSG00000029587	Zfp12	2147	1852	2284	1852	1797	1566	2192	1886	1900	1901	2387	1952	1962.43	-0.101533	0.0589517	-1.719	0.0856151	0.727578
ENSMUSG00000031438	Rnf128	1152	1169	1482	1397	944	992	1169	1245	1234	1459	993	1305	1217.53	-0.101508	0.0649162	-1.59471	0.110776	0.770168
ENSMUSG00000034342	Cbl	5148	5095	6371	4611	4674	3980	5187	4882	5003	5809	5676	5039	5102.39	-0.10136	0.0592975	-1.69988	0.0891537	0.735435
ENSMUSG00000034557	Zfyve9	7259	5782	7299	5025	5742	5753	6906	6410	5262	6372	8013	6565	6300.17	-0.101348	0.0536738	-1.88866	0.0589369	0.652175
ENSMUSG00000057378	Ryr3	2720	2236	2944	2315	2492	2013	2345	2544	2566	2366	3556	2418	2520.63	-0.101267	0.0564429	-1.81125	0.0701026	0.686212
ENSMUSG00000043991	Pura	736	680	665	731	581	590	785	696	637	638	745	641	675.981	-0.101164	0.0660351	-1.52921	0.126212	0.794076
ENSMUSG00000030525	Chrna7	567	539	542	399	576	467	557	590	566	418	379	503	512.911	-0.101133	0.0656203	-1.61139	0.107095	0.762793
ENSMUSG00000074671	Tspyl3	1545	1264	1323	1050	1086	1136	1230	1412	1196	1358	1459	1134	1258.24	-0.101118	0.0625867	-1.62943	0.103222	0.755926
ENSMUSG00000036469	March1	2472	2081	2474	1741	1845	1781	2329	2202	1883	2028	2576	2174	2111.58	-0.101114	0.0565618	-1.78729	0.0738902	0.694476
ENSMUSG00000023915	Tnfrsf21	9144	7023	8900	6489	6636	7260	8327	8993	7179	7392	8609	7982	7774.13	-0.101111	0.0540566	-1.88138	0.0599198	0.654437
ENSMUSG00000035910	Dcdc2a	2484	1753	2088	1799	1824	2101	2607	2311	1917	1581	2193	2113	2053.63	-0.101044	0.0636353	-1.62303	0.104584	0.758115
ENSMUSG00000043557	Mdga1	9920	8032	9999	8298	7332	7550	9366	10620	8465	7854	8764	9136	8746.41	-0.100978	0.0595101	-1.7279	0.0840059	0.722562
ENSMUSG00000025425	St8sia5	2525	1642	1935	1519	1678	1761	2023	2079	1694	1622	2068	2138	1876.46	-0.100947	0.0618679	-1.63329	0.102408	0.755926
ENSMUSG00000035189	Ano4	1377	1035	1241	963	944	899	1187	1043	1040	1018	1319	1179	1093.72	-0.100929	0.0623435	-1.6194	0.105361	0.7592
ENSMUSG00000020411	Nipal4	134	108	192	151	124	101	90	123	187	130	68	95	127.428	-0.100914	0.0569407	-1.99443	0.0461046	0.602363
ENSMUSG00000040372	Gpr63	1066	989	1180	1026	894	582	829	952	1089	1000	720	1035	952.711	-0.100896	0.0666464	-1.59115	0.111576	0.770643
ENSMUSG00000022601	Zbtb11	4287	3457	4389	3387	3426	3212	4012	3439	3506	4242	4628	3864	3791.19	-0.100891	0.0557446	-1.81629	0.0693264	0.686212
ENSMUSG00000052331	Ankrd44	501	550	601	581	559	371	710	484	411	624	647	384	532.389	-0.100708	0.0670589	-1.5172	0.129217	0.797528
ENSMUSG00000039968	Rsbn1l	2139	2097	2503	1987	1974	1615	2327	1759	2017	2401	2290	2120	2095.95	-0.1007	0.0642848	-1.56694	0.117129	0.7799
ENSMUSG00000018474	Chd3	63386	53817	66440	50110	56190	48684	62441	59796	50232	60636	70982	59427	58068.7	-0.100685	0.0534149	-1.88128	0.0599342	0.654437
ENSMUSG00000074736	Syndig1	2231	1416	1730	1427	1351	1408	1514	1617	1628	1388	2148	1695	1611.43	-0.100627	0.0641991	-1.56661	0.117206	0.7799
ENSMUSG00000026640	Plxna2	7318	6610	7081	5778	5632	5246	5653	5911	6300	7956	8008	6194	6436.34	-0.10059	0.0608653	-1.69473	0.0901274	0.73698
ENSMUSG00000027612	Mmp24	1728	1854	2213	1568	1633	1410	1648	1791	1925	1993	1947	1656	1777.79	-0.100556	0.061708	-1.62781	0.103565	0.755926
ENSMUSG00000018412	Kansl1	4090	3781	4415	3587	3232	2862	3693	3574	3811	4197	4318	3698	3753.04	-0.100498	0.0580379	-1.73731	0.0823322	0.717293
ENSMUSG00000041992	Rapgef5	12650	9399	12029	9165	8776	8147	10497	10931	10297	10241	11891	10032	10250.7	-0.100425	0.0538515	-1.86692	0.0619133	0.662781
ENSMUSG00000094870	Zfp131	2378	3062	3888	3223	2723	2354	2506	2657	3583	3794	2661	3165	3024.2	-0.100412	0.0655498	-1.52406	0.127493	0.796455
ENSMUSG00000003948	Mmd	18487	16528	19199	15279	13913	13820	16458	17954	16837	16793	18237	17409	16672	-0.100383	0.0533386	-1.89849	0.0576318	0.648856
ENSMUSG00000061898	Rbak	977	779	1057	758	657	723	829	795	833	858	1057	819	837.08	-0.100288	0.0625869	-1.60549	0.108385	0.765168
ENSMUSG00000020544	Cox11	262	180	252	202	207	225	263	180	189	263	223	189	219	-0.100266	0.065677	-1.5594	0.118902	0.782538
ENSMUSG00000037426	Depdc5	4373	3234	4157	3067	3142	2841	3966	3615	3274	3312	4348	3644	3542.4	-0.100259	0.0552587	-1.81066	0.0701927	0.686212
ENSMUSG00000040618	Pck2	2409	1763	2212	1592	1667	2016	2252	2043	1887	1611	2908	1784	1984.08	-0.100231	0.0606816	-1.65622	0.0976767	0.755926
ENSMUSG00000028382	Ptbp3	4466	4555	6149	4255	3904	3319	4120	3844	5332	5180	4102	4980	4525.46	-0.100214	0.0651531	-1.58878	0.112109	0.770643
ENSMUSG00000028226	Mmp16	701	829	967	748	617	553	712	688	720	852	861	731	745.858	-0.100212	0.0658159	-1.48624	0.137216	0.810503
ENSMUSG00000019873	Reep3	1147	1359	1693	1384	1083	939	1410	1064	1334	1638	1297	1135	1289.97	-0.100203	0.0659721	-1.48929	0.136412	0.809685
ENSMUSG00000079260	Tmppe	437	454	543	429	353	238	300	338	439	467	351	446	401.348	-0.100109	0.0650979	-1.61079	0.107224	0.762793
ENSMUSG00000034040	Galnt17	17324	11827	14711	10793	11699	10970	14724	15184	12061	10163	15367	14618	13147.8	-0.10005	0.0590551	-1.70327	0.0885181	0.733711
ENSMUSG00000022946	Dop1b	2828	2337	2853	2049	2257	2154	2575	2527	2224	2273	3646	2409	2477.85	-0.100005	0.0540783	-1.85634	0.0634051	0.665686
ENSMUSG00000041115	Iqsec2	16861	14042	15483	12621	13384	11971	14902	14615	13722	14106	17115	15626	14449.2	-0.0999099	0.0557542	-1.80022	0.0718254	0.690579
ENSMUSG00000018750	Zbtb4	12059	10473	12970	9892	9594	8772	10852	10247	10903	11744	13270	11116	10915.7	-0.0998546	0.0540127	-1.8573	0.0632681	0.665686
ENSMUSG00000055675	Kbtbd11	32948	23991	30225	21729	23982	22886	28758	29264	24250	23794	31694	28659	26592.7	-0.0998128	0.0534476	-1.87172	0.0612453	0.659887
ENSMUSG00000054863	Fam19a5	6349	4481	5769	4307	4274	4575	5250	5505	5016	4466	6307	5198	5074.47	-0.0997709	0.0547028	-1.82721	0.0676676	0.683044
ENSMUSG00000018001	Cyth3	3458	3426	4252	3499	2828	2662	3219	3492	3862	3710	3498	3463	3446.22	-0.0997455	0.0592293	-1.69949	0.0892264	0.735435
ENSMUSG00000015501	Hivep2	26687	21593	24135	18106	20616	17773	22163	22937	20889	19999	26726	24437	22001.5	-0.0996612	0.0572768	-1.75121	0.0799094	0.711814
ENSMUSG00000039704	Lmbrd2	998	920	1211	1078	921	500	935	655	814	1333	990	910	936.186	-0.099579	0.0668825	-1.4735	0.140617	0.81269
ENSMUSG00000036641	Ccdc148	1666	1395	1833	1378	1375	1233	1807	1486	1334	1411	1913	1499	1511.93	-0.0994718	0.0605652	-1.64419	0.100136	0.755926
ENSMUSG00000019906	Lin7a	359	344	440	452	363	354	378	380	248	561	509	346	392.707	-0.0994711	0.0670749	-1.49549	0.134786	0.807946
ENSMUSG00000035840	Lysmd3	647	837	1125	970	609	444	764	573	925	992	557	721	769.794	-0.0994616	0.0664892	-1.48322	0.138017	0.812474
ENSMUSG00000024383	Map3k2	2844	2762	3664	2924	2709	2149	2654	2548	3336	3518	2937	2885	2914.28	-0.0994118	0.0636381	-1.58398	0.113198	0.770643
ENSMUSG00000045333	Zfp423	739	639	887	968	745	777	1013	839	609	894	901	672	805.51	-0.0993874	0.0670082	-1.46608	0.142626	0.815883
ENSMUSG00000027457	Snph	25875	21187	24335	18860	19265	18653	21556	23842	21618	20776	26757	22770	21961.7	-0.0993449	0.0525382	-1.90653	0.0565809	0.64562
ENSMUSG00000022987	Zfp641	986	1035	1278	1105	1039	912	1005	1064	1161	1257	1238	1001	1090.76	-0.0993217	0.0629864	-1.55712	0.119443	0.783072
ENSMUSG00000045589	Frrs1l	33945	22763	28765	21956	22638	21137	28063	27850	23304	22960	31055	27625	25716.5	-0.0992827	0.0555258	-1.77959	0.0751438	0.699104
ENSMUSG00000022013	Dnajc15	1332	749	1137	834	819	877	1175	1010	817	805	1366	878	965.749	-0.0992395	0.0642933	-1.52747	0.126645	0.794839
ENSMUSG00000038174	Fam126b	5399	5047	6824	5077	4668	4374	5242	4574	5449	6524	6264	5400	5378.15	-0.0991825	0.0580873	-1.71466	0.0864072	0.728832
ENSMUSG00000037235	Mxd4	6139	6813	9338	6809	6125	5330	6192	5951	7733	8604	7195	7080	6946.94	-0.099181	0.0617184	-1.60163	0.109238	0.766333
ENSMUSG00000035914	Cd276	1151	1440	1677	1221	1174	1024	1054	1338	1606	1503	1199	1280	1313.18	-0.0991575	0.0657189	-1.54517	0.122305	0.786228
ENSMUSG00000039106	Htr5a	573	601	637	634	595	525	453	451	647	747	723	666	606.83	-0.0991554	0.0670614	-1.57048	0.116304	0.779
ENSMUSG00000020868	Xylt2	1004	1143	1146	885	861	930	1000	1092	1012	981	1290	968	1021.44	-0.0990573	0.0615648	-1.58898	0.112065	0.770643
ENSMUSG00000054939	Zfp174	492	608	723	591	558	520	475	549	519	809	705	607	596.77	-0.099022	0.0663866	-1.49228	0.135626	0.807946
ENSMUSG00000041852	Tcf20	9012	7384	8824	6970	7622	7043	8203	8261	7195	7978	10347	8589	8054.85	-0.0989203	0.0514078	-1.93042	0.0535554	0.63376
ENSMUSG00000040738	Ints8	1401	954	1005	779	868	904	1290	1076	847	863	1252	953	1002.06	-0.0988954	0.0602109	-1.63346	0.102373	0.755926
ENSMUSG00000021779	Thrb	3129	3311	3599	2922	2993	2395	3036	3071	2868	3552	3467	3370	3137.05	-0.0988145	0.0627565	-1.56895	0.116659	0.779378
ENSMUSG00000053716	Dusp7	2773	2346	2659	2042	2008	1962	2122	2324	2693	2462	2527	2345	2349.18	-0.098737	0.0627916	-1.61533	0.10624	0.76138
ENSMUSG00000061578	Ksr2	7798	6726	8584	6170	6153	6236	7138	7418	6739	7364	9018	7160	7147.22	-0.0987142	0.0493591	-2.00548	0.0449121	0.598074
ENSMUSG00000045917	Tmem268	554	422	528	446	387	381	596	498	374	444	454	432	456.501	-0.0986816	0.0668163	-1.51791	0.129038	0.797528
ENSMUSG00000038774	Ascc3	1284	1178	1548	1232	1235	1064	1381	1057	1313	1581	1509	1149	1289.43	-0.0986803	0.0637169	-1.55118	0.120858	0.784952
ENSMUSG00000024268	Celf4	25989	25614	34255	24738	23771	24700	24992	25991	25314	33136	37401	25288	27378.3	-0.0986514	0.0538272	-1.83189	0.0669672	0.680181
ENSMUSG00000036611	Eepd1	1445	1105	1242	936	1040	1171	1249	1242	1114	983	1571	1247	1184.04	-0.0986181	0.0600636	-1.64479	0.100014	0.755926
ENSMUSG00000040596	Pogk	2212	2244	2598	1933	1982	1609	2126	1843	2255	2383	2760	1967	2145.43	-0.0986152	0.0619767	-1.58526	0.112907	0.770643
ENSMUSG00000054920	Klhl5	3836	2806	3311	2751	2367	2643	3608	3360	2810	2698	3649	2823	3021.16	-0.0985529	0.0549257	-1.79341	0.0729067	0.69383
ENSMUSG00000034135	Sik3	10369	7055	8058	6804	7276	6716	8873	8293	7503	7011	9873	7944	7900.43	-0.0985226	0.055033	-1.77961	0.0751392	0.699104
ENSMUSG00000014039	Prdm15	1223	940	1162	897	846	719	1047	804	920	1034	1465	851	976.767	-0.0984751	0.0642946	-1.53744	0.124185	0.789095
ENSMUSG00000063410	Stk24	2968	2472	2757	2324	2235	2144	3159	2499	2216	2782	2732	2501	2548.96	-0.0984649	0.059182	-1.68699	0.0916055	0.73978
ENSMUSG00000036198	Arhgap36	101	60	97	59	74	82	74	45	39	76	105	57	71.5706	-0.0984561	0.0529899	-1.93109	0.0534715	0.63376
ENSMUSG00000020516	Rps6kb1	2741	2299	3016	2383	2107	1905	2417	2301	2537	2803	2823	2441	2467.04	-0.0984024	0.0582923	-1.69952	0.0892215	0.735435
ENSMUSG00000053198	Prx	213	153	148	203	153	117	165	154	170	145	157	124	159.051	-0.0983707	0.0617863	-1.57789	0.114591	0.775208
ENSMUSG00000022867	Usp25	3809	2686	3777	2730	2677	2636	3610	3064	2960	3057	3358	3347	3117.06	-0.0983672	0.0574788	-1.72033	0.0853716	0.727112
ENSMUSG00000026135	Zfp142	697	790	936	775	839	553	701	692	769	967	986	696	782.075	-0.0982814	0.065874	-1.45142	0.146662	0.820018
ENSMUSG00000024764	Naa40	1692	2111	2522	2247	1956	1623	1751	1926	2512	2655	2041	1911	2092.91	-0.0982517	0.0647896	-1.49714	0.134358	0.807946
ENSMUSG00000072915	Gm12258	1505	1740	2471	1896	1567	1457	1541	1611	2166	2292	1946	1707	1828.28	-0.098238	0.0612844	-1.58432	0.113121	0.770643
ENSMUSG00000035248	Tut7	2996	2241	2949	2362	2159	1953	2675	2440	2269	2593	3109	2527	2496.82	-0.098206	0.0568005	-1.72527	0.0844791	0.723695
ENSMUSG00000073982	Rhog	624	673	927	616	653	502	716	668	765	636	562	669	669.921	-0.098201	0.0670546	-1.46973	0.141634	0.814979
ENSMUSG00000021559	Dapk1	14565	10129	12486	9719	10455	9874	12461	12554	10410	10566	13174	12474	11475.4	-0.0981735	0.0563513	-1.74539	0.0809166	0.715201
ENSMUSG00000059173	Pde1a	18734	13138	16208	12361	13247	13663	16411	16087	12732	14742	18819	15216	14946.4	-0.098156	0.0506318	-1.93509	0.0529788	0.631601
ENSMUSG00000057181	5730455P16Rik	5213	3688	4323	3304	3852	3589	4543	4170	3637	3752	5604	4146	4099.45	-0.0981233	0.0518721	-1.88474	0.059465	0.654222
ENSMUSG00000020340	Cyfip2	58544	41131	49323	33460	41540	38688	47682	46864	38583	40721	62433	46105	44765	-0.0980801	0.0518742	-1.88023	0.0600761	0.654437
ENSMUSG00000075705	Msrb1	1308	937	1073	807	806	1031	1293	1195	770	832	1268	986	1011.86	-0.098061	0.063015	-1.57028	0.11635	0.779024
ENSMUSG00000038365	Fbxo25	5018	3217	3977	2948	2981	3286	4237	3791	3089	3521	4856	3412	3636.59	-0.0979953	0.0549661	-1.75815	0.0787228	0.705178
ENSMUSG00000032012	Nectin1	3264	3670	4432	3264	3115	3317	3475	3439	3233	4872	4117	3353	3619.66	-0.0979808	0.0621876	-1.55299	0.120425	0.784952
ENSMUSG00000041945	Mfsd9	140	130	203	127	111	79	98	119	153	133	120	99	126.018	-0.0979366	0.0617784	-1.5924	0.111295	0.770274
ENSMUSG00000039738	Slx4	1344	1572	1780	1459	1513	1191	1507	1359	1506	1810	1748	1418	1516.75	-0.0979225	0.0645424	-1.46755	0.142226	0.815883
ENSMUSG00000021721	Htr1a	6650	4729	6104	4647	4853	4610	6075	5928	5147	4425	5871	6073	5387.78	-0.0979159	0.0602421	-1.64605	0.0997542	0.755926
ENSMUSG00000022105	Rb1	1740	1355	1621	1348	1097	1226	1698	1440	1424	1498	1333	1443	1429.02	-0.0978747	0.0608358	-1.63466	0.102121	0.755926
ENSMUSG00000033569	Adgrb3	13434	8808	10399	7953	8709	8655	10384	10673	8461	8513	13795	10379	9866.33	-0.0978147	0.0555393	-1.74783	0.0804931	0.71362
ENSMUSG00000072640	Lyrm9	2084	2067	2783	2014	1958	1838	1979	1944	2192	2748	2766	2011	2186.75	-0.0977609	0.0596653	-1.64546	0.0998748	0.755926
ENSMUSG00000028958	Tmub1	823	763	794	571	625	742	656	713	702	797	970	672	730.977	-0.0977497	0.0660545	-1.49754	0.134252	0.807946
ENSMUSG00000064115	Cadm2	10850	8691	10857	7984	8562	7385	10430	8538	8668	9970	11331	9186	9283.39	-0.0976914	0.0550616	-1.77555	0.0758064	0.702344
ENSMUSG00000029471	Camkk2	14712	11589	12558	9553	10141	9093	11241	11791	10087	11419	15943	11800	11510.8	-0.0976669	0.0572991	-1.70642	0.0879305	0.731165
ENSMUSG00000053604	Rpia	869	720	987	781	638	704	838	876	756	920	771	756	798.916	-0.0976485	0.0640984	-1.54168	0.123152	0.787252
ENSMUSG00000029361	Nos1	6213	6350	6968	4786	5488	5732	6773	6559	4664	6693	8172	5416	6088.65	-0.097631	0.0604371	-1.60199	0.109158	0.766333
ENSMUSG00000066571	4931406P16Rik	506	669	808	629	541	350	529	492	612	870	571	469	588.473	-0.0975777	0.067004	-1.41397	0.157372	0.833528
ENSMUSG00000044847	Lsm11	3380	3923	5124	3987	3514	2638	3438	3351	4718	4852	3304	3719	3850.75	-0.0975474	0.0659955	-1.49212	0.135667	0.807946
ENSMUSG00000047787	Flrt1	606	534	509	572	469	515	541	512	477	620	763	472	545.666	-0.0975388	0.0660883	-1.48089	0.138637	0.812474
ENSMUSG00000019947	Arid5b	3447	3340	4092	3161	3367	2635	3100	3159	3320	4123	4301	3391	3436.52	-0.0975043	0.0600203	-1.63546	0.101953	0.755926
ENSMUSG00000048490	Nrip1	4787	3576	4389	3319	3456	3324	4312	4060	3617	3686	4467	4228	3902.98	-0.0974536	0.0560765	-1.74301	0.0813318	0.7171
ENSMUSG00000049922	Slc35c1	1440	1423	1614	1343	1282	1171	1250	1367	1579	1498	1474	1518	1415.49	-0.0974117	0.0643798	-1.55353	0.120296	0.784952
ENSMUSG00000070056	Mfhas1	4440	4976	6373	4718	4165	3594	4369	4327	5395	5526	5308	4900	4835.47	-0.0974095	0.0608982	-1.58986	0.111866	0.770643
ENSMUSG00000056014	A430033K04Rik	1374	1213	1336	1113	1181	1039	1342	1144	1187	1321	1229	1357	1235.43	-0.0973614	0.0654515	-1.5113	0.130711	0.801443
ENSMUSG00000000184	Ccnd2	10611	14024	19154	14079	12558	8995	11683	10146	13679	16970	12006	12230	13085.6	-0.0973115	0.0646965	-1.46086	0.144053	0.816856
ENSMUSG00000047417	Rexo1	3682	2828	3073	2428	2820	2648	3061	3103	2937	2839	3439	3159	2985	-0.0973107	0.0600252	-1.62828	0.103466	0.755926
ENSMUSG00000020431	Adcy1	56797	58640	74098	48042	50430	39380	48585	47285	63889	63347	57246	59854	55577.5	-0.0972887	0.0645779	-1.54665	0.121947	0.786167
ENSMUSG00000056529	Ptafr	115	125	187	158	98	98	134	79	119	163	90	116	124.452	-0.0972645	0.0592027	-1.69805	0.0894992	0.735435
ENSMUSG00000020716	Nf1	4147	3119	3916	3160	3124	3111	3490	3620	3260	3599	4593	3577	3526.84	-0.0972557	0.0535461	-1.82692	0.0677113	0.683044
ENSMUSG00000032773	Chrm1	21284	14675	17306	12828	14314	14013	16830	18037	14490	14338	20600	16766	16097.7	-0.0972531	0.0541657	-1.78846	0.073701	0.693833
ENSMUSG00000013033	Adgrl1	29371	24284	28488	20420	21618	22223	24254	25630	24111	25030	31726	26430	25082	-0.097198	0.051909	-1.88851	0.0589573	0.652175
ENSMUSG00000004356	Utp20	1145	775	935	780	822	871	1117	775	915	776	1294	798	905.516	-0.096963	0.0642813	-1.52958	0.12612	0.794046
ENSMUSG00000044950	Pwwp2a	2745	2915	3635	2862	2529	2445	2632	2932	3420	3351	2865	2953	2947.94	-0.096927	0.0611782	-1.60439	0.108629	0.765815
ENSMUSG00000057234	Mettl15	285	233	197	227	194	195	247	233	159	189	264	244	221.061	-0.0968838	0.0661911	-1.46863	0.141934	0.815675
ENSMUSG00000037887	Dusp8	13822	12382	14219	10899	10362	10320	11184	12481	13160	13123	14382	12531	12347	-0.0968693	0.0559064	-1.76597	0.0774013	0.703901
ENSMUSG00000034271	Jdp2	2030	1401	1625	1328	1302	1451	1500	1709	1610	1363	1680	1707	1551.42	-0.0968226	0.0638229	-1.53915	0.123767	0.787436
ENSMUSG00000051390	Zbtb22	2744	1793	1836	1570	1650	1616	2111	1881	1568	1816	2638	1924	1899.61	-0.0967774	0.059826	-1.57793	0.114582	0.775208
ENSMUSG00000025854	Fam20c	1194	985	1072	835	842	1049	1228	1064	928	980	1246	887	1017.22	-0.0967618	0.0634301	-1.527	0.12676	0.794839
ENSMUSG00000042632	Pla2g6	902	701	926	741	738	667	970	828	767	734	910	713	794.016	-0.0967517	0.0644545	-1.51411	0.129998	0.799115
ENSMUSG00000018076	Med13l	8691	9209	11730	8452	7955	7218	8234	7963	9722	11062	9128	10036	9120.7	-0.0966464	0.0627941	-1.56737	0.117027	0.7799
ENSMUSG00000031583	Wrn	574	457	599	516	503	444	644	536	418	456	752	460	523.32	-0.0966012	0.0665497	-1.46671	0.142454	0.815883
ENSMUSG00000078453	Abracl	1840	804	1244	899	1025	1170	1248	1335	1055	810	1311	1360	1161.67	-0.0966011	0.0668479	-1.39184	0.163971	0.843597
ENSMUSG00000038255	Neurod2	13481	10094	12806	9461	9523	10356	10705	12057	12339	10083	12860	12004	11253.4	-0.0964888	0.0568273	-1.72834	0.0839278	0.722562
ENSMUSG00000037315	Jade3	598	580	709	549	514	506	569	587	600	723	725	430	587.713	-0.0964561	0.0660964	-1.48264	0.138171	0.812474
ENSMUSG00000022456	Sept3	31085	25911	31952	24089	24551	23161	27858	28694	25533	29736	32992	28026	27591.7	-0.0964062	0.0514546	-1.8819	0.0598494	0.654437
ENSMUSG00000041702	Btbd7	2004	2403	3249	2647	2322	1743	2214	1967	2789	3179	2337	2461	2454.89	-0.0963858	0.0660943	-1.42857	0.153129	0.831761
ENSMUSG00000063632	Sox11	1311	1647	2209	1511	1511	1367	1374	1399	1646	2087	2053	1581	1637.45	-0.0963731	0.0636129	-1.47189	0.141051	0.812905
ENSMUSG00000056812	St8sia3	10153	7283	8650	6790	7004	6697	8834	8738	7354	6930	10108	8111	7962.49	-0.0963633	0.0530414	-1.81302	0.0698282	0.686212
ENSMUSG00000042672	Dcst1	298	310	370	192	297	257	315	305	257	216	419	260	288.027	-0.0963631	0.0670525	-1.4144	0.157245	0.833528
ENSMUSG00000054889	Dsp	1606	1269	2142	1393	1501	1030	1771	1369	1573	1529	1599	1393	1504.74	-0.0963173	0.0649637	-1.46521	0.142863	0.815883
ENSMUSG00000030207	Fam234b	30571	22905	26453	19884	20385	21471	26439	27059	22180	21191	31579	24532	24258.1	-0.0962629	0.0490482	-1.96069	0.0499152	0.618692
ENSMUSG00000050783	Htr1f	84	42	102	50	49	60	29	32	41	63	54	61	55.533	-0.0962539	0.047762	-2.11814	0.0341628	0.544542
ENSMUSG00000039059	Hrh3	1091	1267	1341	1324	1180	1227	933	1405	1176	1563	1760	1230	1290.13	-0.0962014	0.0597049	-1.66688	0.0955383	0.752964
ENSMUSG00000037692	Ahdc1	3681	2703	2931	2636	2726	2380	2894	2910	2830	2800	3758	2978	2911.32	-0.0961906	0.0599707	-1.60557	0.108369	0.765168
ENSMUSG00000026830	Ermn	506	425	815	549	430	309	663	490	541	351	588	368	497.419	-0.0961873	0.0665845	-1.44061	0.149695	0.826198
ENSMUSG00000042500	Ago4	1061	1079	1286	987	908	819	981	861	1201	1285	1202	922	1046.78	-0.0961614	0.0652874	-1.49586	0.13469	0.807946
ENSMUSG00000048388	Fam171b	20531	14748	16902	12546	13277	13881	17787	16736	12354	15088	22188	15322	15688.8	-0.0961381	0.0522384	-1.83207	0.0669415	0.680181
ENSMUSG00000059742	Kcnh7	6005	4019	4992	3846	3917	3686	4715	4780	4113	3605	6246	4815	4496.37	-0.0961139	0.059743	-1.60492	0.108511	0.765348
ENSMUSG00000051599	Pcdhb2	160	134	146	90	113	60	89	89	73	107	151	99	107.866	-0.0960632	0.0560704	-1.65681	0.0975572	0.755926
ENSMUSG00000046329	Slc25a23	12939	12990	15490	11537	11345	10221	12821	12608	12897	14231	14380	12705	12796.9	-0.0960471	0.0559417	-1.71096	0.0870886	0.729394
ENSMUSG00000061393	Acvr2b	168	251	260	188	231	118	158	78	201	231	149	200	189.095	-0.0960054	0.0539252	-1.87847	0.0603175	0.655297
ENSMUSG00000019102	Aldh3a1	54	66	115	25	59	79	43	14	33	58	54	34	53.2609	-0.0959739	0.0406443	-2.46541	0.0136857	0.3668
ENSMUSG00000026116	Tmem131	2425	1937	2344	1858	1999	1798	2214	2014	1928	2222	3153	1900	2121.88	-0.0959444	0.0553597	-1.74134	0.0816249	0.7171
ENSMUSG00000041997	Tlk1	8635	6342	8173	5807	6041	5677	7233	7100	6284	7067	8612	7134	6930.52	-0.095925	0.0545958	-1.75473	0.0793063	0.707477
ENSMUSG00000087370	Tmem170b	6502	7444	9725	7538	6559	5679	6954	6238	7744	9511	7727	7748	7451.73	-0.0958983	0.0629203	-1.50437	0.132485	0.804701
ENSMUSG00000031627	Irf2	1885	1514	1837	1427	1437	1248	1685	1805	1467	1568	1768	1599	1592.23	-0.0958885	0.0612187	-1.57313	0.115688	0.778168
ENSMUSG00000028525	Pde4b	3480	2687	3456	2949	2484	2540	3059	2760	2322	3917	4475	2555	3011.84	-0.0958789	0.0611024	-1.59959	0.109689	0.767361
ENSMUSG00000033871	Ppargc1b	177	263	366	251	228	129	217	206	160	160	290	255	224.31	-0.0958649	0.0593893	-1.49686	0.13443	0.807946
ENSMUSG00000047604	Frat2	1171	1376	1634	1394	1153	1170	1092	1294	1630	1636	1238	1417	1360.2	-0.0958497	0.065076	-1.51804	0.129004	0.797528
ENSMUSG00000064302	Clasp1	5612	5134	6019	4722	4817	4660	5468	5021	4826	6146	6902	5143	5331.24	-0.0958395	0.054402	-1.76109	0.0782234	0.705068
ENSMUSG00000032410	Xrn1	2408	2082	2487	1928	2009	1679	2347	2128	2053	2320	2391	2124	2151	-0.0956077	0.0606215	-1.57808	0.114548	0.775208
ENSMUSG00000039385	Cdh6	191	152	139	132	154	106	123	92	118	128	144	179	138.582	-0.0954716	0.0583341	-1.71561	0.0862339	0.728832
ENSMUSG00000067336	Bmpr2	9236	7651	9068	6809	7228	7240	9755	8452	6641	8109	10034	8147	8113.18	-0.0953825	0.0526381	-1.81897	0.0689155	0.686212
ENSMUSG00000036158	Prickle1	6238	5088	5899	4084	4179	4423	5108	5704	4867	4852	6223	5224	5107.56	-0.0953578	0.0535608	-1.78706	0.0739275	0.694476
ENSMUSG00000039328	Rnf122	178	183	282	267	248	144	224	194	212	214	168	192	211.109	-0.0953431	0.0612514	-1.47782	0.139456	0.812672
ENSMUSG00000024122	Pdpk1	11819	10274	11791	8969	9133	7746	10450	9758	9850	11126	12169	10295	10204.2	-0.0953099	0.0574887	-1.6595	0.0970144	0.755926
ENSMUSG00000070003	Ssbp4	2133	1387	1504	1366	1386	1548	1654	2002	1421	1266	2008	1515	1583.77	-0.0953091	0.0646177	-1.48045	0.138754	0.812474
ENSMUSG00000042520	Ubap2l	5736	5753	7238	5393	6106	4801	6221	5537	5402	7482	7217	5623	6014.45	-0.0952388	0.0612367	-1.52809	0.126491	0.794839
ENSMUSG00000045790	Ccdc149	5962	4426	5073	3699	4044	4355	5123	5183	3964	4180	6449	4914	4716.64	-0.0951644	0.0523371	-1.81659	0.0692803	0.686212
ENSMUSG00000035275	Raver2	4687	5896	6826	5789	4755	4089	4475	5298	6846	6665	4455	5744	5509.4	-0.0951552	0.0657399	-1.50127	0.133286	0.807412
ENSMUSG00000025582	Nptx1	34499	26351	32253	25109	25070	25234	29242	31099	27677	28685	35023	29616	28916.5	-0.095149	0.0506772	-1.88673	0.0591965	0.652843
ENSMUSG00000024327	Slc39a7	1099	953	978	878	976	826	1161	899	797	966	1147	1083	975.027	-0.0950585	0.06489	-1.47587	0.139979	0.81269
ENSMUSG00000049470	Aff4	20926	17183	21506	17176	17038	15767	19269	19172	17897	19543	23389	19133	18856	-0.0950562	0.0494406	-1.92697	0.0539837	0.6347
ENSMUSG00000031628	Casp3	584	584	741	520	474	478	691	452	441	701	684	519	567.217	-0.0949992	0.067074	-1.44074	0.149657	0.826198
ENSMUSG00000057177	Gsk3a	7929	5387	6384	4558	5236	5627	6910	6828	5288	5270	7643	5824	5995.82	-0.0949734	0.0530839	-1.77802	0.0754011	0.700367
ENSMUSG00000045210	Vcpip1	5715	4084	5062	4031	4324	4245	5227	4644	4137	4501	6673	4703	4717.15	-0.0948887	0.0496151	-1.91169	0.0559153	0.644878
ENSMUSG00000032966	Fkbp1a	65311	39022	48361	37814	39375	46353	53216	55328	40624	37231	58664	50613	47065.3	-0.0948705	0.0574557	-1.63446	0.102163	0.755926
ENSMUSG00000038764	Ptpn3	7428	5598	6201	5156	5147	4805	6305	6082	6104	5501	6722	5861	5867.75	-0.0948583	0.0576623	-1.64571	0.0998236	0.755926
ENSMUSG00000091191	Gm17334	18	29	32	30	32	22	3	11	13	9	17	18	20.3529	-0.0948489	0.0342392	-3.09532	0.00196601	0.13541
ENSMUSG00000028347	Tmeff1	6589	5253	6570	4809	4578	5077	6199	6119	5194	5245	7117	5613	5635.55	-0.0948205	0.0494065	-1.91924	0.0549543	0.642142
ENSMUSG00000050511	Oprd1	205	198	247	187	196	169	118	127	192	233	330	182	197.17	-0.0947622	0.0631177	-1.7108	0.087118	0.729394
ENSMUSG00000025997	Ikzf2	227	426	388	418	362	228	338	240	383	420	329	265	339.742	-0.0947175	0.0629548	-1.35724	0.174706	0.851921
ENSMUSG00000032936	Camkv	90883	57439	66374	51604	56072	62559	70532	77511	56947	52095	87093	69282	65639.8	-0.0947128	0.0568706	-1.65149	0.098639	0.755926
ENSMUSG00000053477	Tcf4	54209	46116	56514	41087	40500	40411	49346	49774	47734	47193	54088	50960	47853.4	-0.0946164	0.0514782	-1.84833	0.0645541	0.669836
ENSMUSG00000028344	Invs	464	442	426	331	300	311	426	398	368	437	442	264	381.03	-0.0946079	0.0670687	-1.42588	0.153902	0.831839
ENSMUSG00000038025	Phf2	4278	3432	4050	3170	3306	3220	3791	3936	3392	3637	4517	3831	3684.12	-0.0945925	0.0536781	-1.76964	0.0767876	0.70329
ENSMUSG00000034801	Sos2	1481	1376	1588	1334	1443	1049	1676	1268	1360	1690	1639	1143	1413.42	-0.0945859	0.0644027	-1.47407	0.140462	0.81269
ENSMUSG00000034532	Fbxo16	1100	987	1213	900	802	679	1049	982	899	975	1058	961	959.71	-0.0945577	0.0643531	-1.45661	0.145225	0.818604
ENSMUSG00000041483	Zfp281	3533	3380	4082	3237	3091	2560	3261	3094	3339	3852	4000	3586	3402.59	-0.0945134	0.0609681	-1.55764	0.119318	0.782538
ENSMUSG00000044968	Napepld	1368	1327	1853	1370	1304	1145	1442	1177	1341	1976	1392	1441	1426.95	-0.0945084	0.0660709	-1.45545	0.145544	0.819119
ENSMUSG00000033382	Trappc8	1994	1504	1917	1288	1417	1414	1791	1525	1397	1507	2474	1576	1622.33	-0.0945074	0.0597747	-1.58613	0.112711	0.770643
ENSMUSG00000022897	Dyrk1a	5970	4828	5676	4301	4497	4730	5593	5217	4595	5492	6099	5315	5152.68	-0.0944785	0.0531691	-1.78027	0.0750315	0.699104
ENSMUSG00000002266	Zim1	895	1481	1812	1674	1376	928	1085	1146	1743	2035	1165	1218	1398.22	-0.0944719	0.0670578	-1.31023	0.190119	0.867949
ENSMUSG00000069072	Slc7a14	11785	9851	12638	9161	9877	8914	10324	10697	9746	12478	12439	10911	10667.4	-0.0944412	0.0575077	-1.65942	0.0970305	0.755926
ENSMUSG00000047797	Gjb1	180	89	211	143	147	88	130	122	118	120	203	106	135.873	-0.0944207	0.0614508	-1.45233	0.146409	0.820018
ENSMUSG00000024376	Epb41l4a	392	441	503	429	392	402	528	421	511	365	426	344	430.98	-0.0944056	0.0665119	-1.44545	0.14833	0.823355
ENSMUSG00000056602	Fry	10431	7310	8124	6143	7379	6997	8418	8532	7328	6821	10495	8287	7929.24	-0.0943348	0.0544188	-1.72461	0.0845976	0.724092
ENSMUSG00000035495	Tstd2	694	661	784	685	519	461	619	569	573	838	818	573	644.29	-0.0943202	0.0658616	-1.43291	0.151884	0.829372
ENSMUSG00000054178	Gm9938	273	198	313	299	220	151	209	142	272	320	232	233	239.006	-0.0943034	0.0644913	-1.53564	0.124627	0.790373
ENSMUSG00000034145	Tmem63c	1681	1462	1645	1194	1374	1150	1373	1426	1347	1589	1931	1387	1449.59	-0.0943005	0.0619591	-1.53412	0.125	0.790753
ENSMUSG00000035547	Capn5	4355	3920	4955	3529	3768	2985	4151	3848	3945	4230	4921	3962	4016.04	-0.0942873	0.0580703	-1.61586	0.106124	0.76138
ENSMUSG00000031665	Sall1	928	1347	1625	1317	1288	768	1093	1111	1470	1497	949	1161	1226.63	-0.0941595	0.066687	-1.34227	0.179507	0.856418
ENSMUSG00000022519	Srl	1705	1322	1864	1273	1258	1029	1688	1625	1388	1149	1487	1466	1425.69	-0.0941454	0.0650259	-1.46387	0.143228	0.815883
ENSMUSG00000052572	Dlg2	19957	21488	22976	20480	19047	15495	18801	18843	20170	25802	24822	19972	20601.5	-0.0940695	0.0586858	-1.60122	0.109329	0.766602
ENSMUSG00000025128	Bhlhe22	6331	4599	6347	3723	4516	4674	5290	5077	4667	5503	6215	5169	5120.04	-0.0939994	0.0596841	-1.5715	0.116067	0.778556
ENSMUSG00000038970	Lmtk2	10179	8150	9318	7048	7581	7376	9187	8343	7274	8413	11685	8969	8521.84	-0.093957	0.0515518	-1.82519	0.0679722	0.683542
ENSMUSG00000045994	B3gat1	15395	10982	12622	10166	9650	9664	11882	12570	11841	10756	13760	12053	11673.4	-0.0939423	0.0570851	-1.64163	0.100668	0.755926
ENSMUSG00000030020	Prickle2	28283	19883	23827	18271	20894	17500	21982	22317	19292	21616	28347	23932	21936.4	-0.0939353	0.057739	-1.62591	0.103968	0.756269
ENSMUSG00000049511	Htr1b	1779	1371	1688	1205	1305	1218	1575	1435	1356	1261	1894	1621	1459.44	-0.093918	0.0605069	-1.55837	0.119146	0.782538
ENSMUSG00000062961	Ccdc177	2614	2199	2612	1935	2047	2153	2507	2622	2377	2072	2684	2284	2328.55	-0.0938787	0.0572871	-1.64668	0.0996242	0.755926
ENSMUSG00000029403	Cdkl2	3391	3281	3876	3258	2824	2666	3499	2866	3268	3953	3731	3310	3314.17	-0.0938139	0.06006	-1.56341	0.117956	0.781465
ENSMUSG00000036019	Tmtc2	319	303	360	308	213	244	292	299	284	343	234	306	292.734	-0.093778	0.0669386	-1.44229	0.14922	0.825556
ENSMUSG00000019768	Esr1	1592	1183	1424	825	1168	1354	1220	1059	987	1325	2021	1353	1272.6	-0.0936377	0.0662431	-1.43469	0.151375	0.829202
ENSMUSG00000031937	Vstm5	735	886	860	749	640	569	556	733	923	805	781	770	754.113	-0.0936376	0.0669697	-1.47686	0.139712	0.812672
ENSMUSG00000051978	Erich1	330	294	331	223	234	207	314	284	217	225	276	300	267.689	-0.0936165	0.0663902	-1.42721	0.15352	0.831839
ENSMUSG00000024462	Gabbr1	69968	45237	54580	40129	43292	45653	57175	58250	44278	43217	66890	51857	50959.5	-0.0936086	0.0529328	-1.74927	0.0802441	0.713055
ENSMUSG00000074939	Chrm5	127	72	123	80	56	68	78	90	31	52	94	71	77.233	-0.0936007	0.050068	-1.93252	0.0532952	0.632885
ENSMUSG00000016200	Syt14	1968	1976	2590	1957	1840	1685	2212	1977	2203	1993	2041	2233	2055.83	-0.0935422	0.0638638	-1.46263	0.143568	0.815883
ENSMUSG00000037857	Nufip2	1584	1559	2007	1557	1582	1256	1795	1341	1534	1997	1914	1544	1631.52	-0.0935229	0.0643979	-1.4408	0.149642	0.826198
ENSMUSG00000022016	Akap11	20360	15026	18109	13890	15295	14147	18368	16989	14473	15853	23204	16541	16629.2	-0.0935207	0.0472936	-1.97524	0.0482411	0.611881
ENSMUSG00000030616	Sytl2	2942	2072	2542	1792	2094	2059	2469	2204	2135	2263	3286	2171	2302.9	-0.0935048	0.0570437	-1.63346	0.102372	0.755926
ENSMUSG00000026977	March7	2289	2147	2310	1942	1808	1933	2494	1832	1954	2480	2443	2099	2133.21	-0.093456	0.0618853	-1.52223	0.127952	0.796455
ENSMUSG00000048240	Gng7	8811	6171	6979	5093	5682	5646	6574	7404	6104	5889	8424	6590	6534.68	-0.0934145	0.0570506	-1.62811	0.103502	0.755926
ENSMUSG00000096696	Zfp960	44	99	112	95	70	37	46	41	63	66	44	71	67.2687	-0.0933942	0.0468852	-1.8918	0.0585177	0.650466
ENSMUSG00000023852	Chd1	3480	3720	4390	3647	3278	3062	3672	3524	3642	4436	3833	3910	3716.55	-0.0933191	0.0610182	-1.51958	0.128616	0.797387
ENSMUSG00000029468	P2rx7	481	473	521	571	455	346	582	435	494	527	336	442	475.778	-0.0932606	0.0656873	-1.49197	0.135707	0.807946
ENSMUSG00000029221	Slc30a9	9851	7644	9897	7618	7643	7747	9782	8847	8136	8120	11518	8398	8671.29	-0.0932467	0.0481851	-1.9352	0.0529653	0.631601
ENSMUSG00000061451	Tmem151a	12152	8917	10282	8064	8439	8258	9508	10117	9892	9167	11366	9852	9596.5	-0.0930213	0.0571698	-1.63598	0.101844	0.755926
ENSMUSG00000026475	Rgs16	354	460	449	361	368	347	315	284	442	537	321	410	391.833	-0.0929669	0.0647326	-1.54338	0.122738	0.787146
ENSMUSG00000057093	Zfp607b	796	672	731	751	643	740	717	746	650	784	981	762	744.08	-0.0929484	0.0631279	-1.47628	0.139869	0.812672
ENSMUSG00000039741	Bahcc1	993	1111	1322	876	917	824	1095	936	1102	1218	1112	864	1027.8	-0.0929465	0.065752	-1.40162	0.16103	0.840455
ENSMUSG00000110185	Igip	5153	4785	5763	4227	4232	4593	5062	4865	4954	5236	5429	5329	4952.71	-0.0929338	0.0554193	-1.68129	0.0927063	0.745407
ENSMUSG00000046449	Nexmif	4321	3967	4820	3516	3696	3176	4265	3929	3521	4470	4791	4153	4021.84	-0.0929202	0.0592591	-1.56505	0.117571	0.780401
ENSMUSG00000024897	Apba1	12740	13543	15660	10571	11405	10656	12602	12239	11979	14455	15734	12892	12792.2	-0.0929072	0.0580667	-1.58655	0.112614	0.770643
ENSMUSG00000021767	Kat6b	3279	3345	4222	3350	3306	2612	3305	2934	3717	3959	4418	3263	3460.43	-0.0929009	0.0596815	-1.54288	0.12286	0.787252
ENSMUSG00000032097	Ddx6	15769	13691	18798	12863	13252	12590	15333	13946	14368	16384	18029	15397	14921.4	-0.0928895	0.0536475	-1.73206	0.0832623	0.720239
ENSMUSG00000060681	Slc9a6	7536	5389	6703	4850	5140	4921	6735	5568	5566	5864	7704	5767	5900.88	-0.0928756	0.0514143	-1.79895	0.0720265	0.691148
ENSMUSG00000037972	Snn	18646	15272	18541	15009	13695	13023	15097	15571	16680	17682	18051	17418	16148.7	-0.092863	0.0577659	-1.63996	0.101014	0.755926
ENSMUSG00000029575	Mmab	1837	1456	1762	1427	1329	1466	1667	1596	1356	1788	2130	1471	1589.63	-0.0928465	0.0586478	-1.58824	0.112233	0.770643
ENSMUSG00000040867	Begain	4010	2964	3008	2550	2812	3161	3147	3612	3178	2661	4210	2978	3164.18	-0.0928315	0.0618534	-1.5083	0.131478	0.801543
ENSMUSG00000066406	Akap13	1487	1700	2072	1904	1328	1352	1862	1437	1919	1819	1945	1416	1684.1	-0.0927941	0.0646499	-1.39567	0.162814	0.84279
ENSMUSG00000073771	Btbd19	460	437	440	420	503	391	348	465	507	474	377	455	444.867	-0.0927916	0.0655845	-1.49837	0.134036	0.807946
ENSMUSG00000050954	Zfp169	392	344	317	354	355	285	380	349	313	379	402	290	346.06	-0.0927849	0.0670679	-1.37453	0.169276	0.850945
ENSMUSG00000059921	Unc5c	1407	1784	1875	1581	1451	1232	1509	1569	1538	1910	1860	1541	1603.14	-0.092774	0.0628346	-1.42651	0.15372	0.831839
ENSMUSG00000052889	Prkcb	30523	20304	23514	19290	20456	18618	24473	25760	20676	18251	28573	24404	22640	-0.0927721	0.0586716	-1.57464	0.11534	0.77698
ENSMUSG00000020105	Lrig3	137	163	200	145	143	129	168	148	141	179	106	109	148.47	-0.0925849	0.0602253	-1.6016	0.109245	0.766333
ENSMUSG00000003378	Grik5	10158	8041	9165	7155	7750	7085	8523	9293	8524	7852	10465	8439	8470.43	-0.0925758	0.0547351	-1.70113	0.0889178	0.735354
ENSMUSG00000024238	Zeb1	2610	2480	2826	2566	2287	2080	2929	2392	2613	3012	2561	2313	2553.47	-0.0925742	0.0626415	-1.49166	0.135788	0.807946
ENSMUSG00000014852	Adamts13	77	58	132	80	69	51	58	40	34	55	143	47	68.6632	-0.0925707	0.0488281	-2.04601	0.0407553	0.582741
ENSMUSG00000027716	Trpc3	183	150	247	201	218	189	188	145	182	267	218	180	197.829	-0.0925631	0.0648601	-1.42249	0.154885	0.832931
ENSMUSG00000031562	Dctd	411	374	470	401	429	490	454	413	349	423	666	435	439.658	-0.0925523	0.0667223	-1.35038	0.176894	0.85355
ENSMUSG00000044770	Scml4	321	529	540	503	497	349	445	423	409	601	625	355	466.522	-0.0925483	0.0670109	-1.22786	0.2195	0.907109
ENSMUSG00000046999	1110032F04Rik	607	362	532	371	445	455	517	427	484	358	695	434	467.315	-0.09252	0.0664822	-1.39151	0.164072	0.843597
ENSMUSG00000025475	Adgra1	1106	1188	1265	1113	1204	1223	1194	1092	1060	1577	1737	1009	1224.73	-0.0924412	0.0653011	-1.39118	0.164171	0.843597
ENSMUSG00000066042	Med18	328	225	327	276	231	256	280	282	270	277	254	288	274.319	-0.0924258	0.0667921	-1.40731	0.159337	0.837378
ENSMUSG00000025531	Chm	1760	1269	1628	1289	1356	1224	1673	1432	1296	1378	1943	1462	1458.36	-0.0924153	0.0578717	-1.59519	0.110669	0.770168
ENSMUSG00000031642	Sh3rf1	8896	5902	7201	5473	5838	5708	7595	8077	6207	5352	7067	7208	6652.56	-0.0923972	0.0608452	-1.53381	0.125077	0.790753
ENSMUSG00000040661	Rad54l2	3355	3706	4585	3582	3466	2677	3306	3392	3957	4369	4141	3566	3671.85	-0.0923908	0.0614497	-1.48787	0.136786	0.809685
ENSMUSG00000036834	Plch1	536	527	399	475	560	471	575	404	471	542	650	421	502.504	-0.0923356	0.0668653	-1.35939	0.174024	0.850945
ENSMUSG00000020661	Dnmt3a	11011	15652	20011	15775	14803	10836	12541	12632	18164	18764	14405	15755	15142.5	-0.0923285	0.0658634	-1.32714	0.184463	0.864174
ENSMUSG00000059327	Eda	410	433	459	379	414	358	377	413	366	504	506	400	417.414	-0.0922996	0.0668972	-1.38441	0.166232	0.846599
ENSMUSG00000073805	Fam196a	369	518	666	437	339	407	400	430	518	554	469	437	462.843	-0.0922906	0.0668749	-1.31849	0.187339	0.865866
ENSMUSG00000013419	Zfp651	7774	7444	9625	7002	6777	5927	6999	7150	8366	8815	8285	7825	7647.18	-0.0922873	0.0593818	-1.5776	0.114657	0.77537
ENSMUSG00000032425	Zfp949	1705	1647	2223	1540	1564	1670	1742	1754	1768	1893	2318	1669	1779.04	-0.0922719	0.057504	-1.58665	0.112593	0.770643
ENSMUSG00000024477	Pggt1b	322	278	445	295	296	171	338	283	218	375	324	236	295.627	-0.0922382	0.0653895	-1.36544	0.172115	0.850945
ENSMUSG00000013275	Slc41a1	5326	4504	5098	4055	4007	3512	5482	4892	3954	4723	4896	4437	4537.99	-0.0921985	0.0576467	-1.61104	0.107171	0.762793
ENSMUSG00000054871	Tmem158	3470	1936	2204	1695	1939	2491	2458	2906	1858	1656	3049	2626	2324.75	-0.0921961	0.0642603	-1.40538	0.159908	0.837727
ENSMUSG00000051379	Flrt3	1165	1355	1598	1388	1169	1122	1347	1324	1293	1793	1480	1109	1344.16	-0.0921247	0.0634011	-1.41775	0.156263	0.833528
ENSMUSG00000040543	Pitpnm3	3084	3154	3729	2915	2983	2676	3027	2407	2913	4275	4212	3141	3190.87	-0.0921227	0.06406	-1.4606	0.144125	0.816856
ENSMUSG00000025856	Pdgfa	2116	1735	2609	1796	1702	1949	2052	1973	1940	2301	2478	2003	2039.41	-0.0921156	0.0574584	-1.59805	0.110033	0.76947
ENSMUSG00000003934	Efnb3	13811	10745	13824	10592	10666	11586	12321	13784	11743	12393	14300	12234	12256.7	-0.0920946	0.0532059	-1.74228	0.0814594	0.7171
ENSMUSG00000026489	Coq8a	3867	2561	2797	2472	2432	2615	3274	3380	2737	2284	3372	2816	2856.8	-0.0920493	0.0613506	-1.49777	0.134194	0.807946
ENSMUSG00000068130	Zfp442	94	37	94	56	85	35	59	25	43	100	59	20	58.5813	-0.0920463	0.0475734	-2.1593	0.0308267	0.519358
ENSMUSG00000022440	C1qtnf6	209	274	320	260	212	176	200	217	259	274	250	241	241.958	-0.0920165	0.0659677	-1.36953	0.170835	0.850945
ENSMUSG00000028865	Cd164l2	54	36	40	36	44	48	27	23	23	44	38	23	36.7326	-0.0919593	0.0435593	-2.18978	0.02854	0.503755
ENSMUSG00000053519	Kcnip1	377	498	571	616	511	400	435	425	576	664	540	442	508.899	-0.0919562	0.0670708	-1.29851	0.194111	0.869281
ENSMUSG00000044982	Sft2d3	357	532	598	571	386	338	381	447	572	626	291	454	469.947	-0.0919396	0.0659053	-1.45791	0.144864	0.818191
ENSMUSG00000024304	Cdh2	3922	3633	4057	3491	3390	3093	4220	3637	3302	4321	4563	3363	3722.84	-0.0918058	0.0561111	-1.63335	0.102395	0.755926
ENSMUSG00000057406	Nsd2	5538	5025	5608	4808	4747	4351	5452	4933	5233	5773	6193	4887	5187.7	-0.0918014	0.0561515	-1.63471	0.102109	0.755926
ENSMUSG00000059213	Ddn	184485	154586	184861	140513	137305	128656	145868	167657	178287	157233	166370	173364	159501	-0.0917569	0.059849	-1.5825	0.113535	0.772188
ENSMUSG00000053580	Tanc2	9726	9421	11195	8643	8724	8495	8517	9444	9287	10779	12777	10269	9714.96	-0.0917519	0.0528861	-1.7643	0.0776815	0.704172
ENSMUSG00000046768	Rhoj	123	124	153	167	98	88	131	115	83	168	144	79	122.255	-0.0916814	0.0613438	-1.49906	0.133859	0.807936
ENSMUSG00000032540	Abhd5	800	1110	1534	1132	954	747	982	852	1194	1475	945	1001	1066.14	-0.0916124	0.0670611	-1.30775	0.190959	0.867955
ENSMUSG00000027189	Trim44	24883	20080	23720	17868	18418	18543	23516	21589	18142	22450	26917	21432	21233.7	-0.0915725	0.0495488	-1.84918	0.0644325	0.669335
ENSMUSG00000003452	Bicd1	1246	1420	1958	1488	1183	1014	1498	1201	1459	1552	1625	1357	1411.09	-0.0915356	0.0649804	-1.35008	0.17699	0.85355
[truncated: 16,928 more rows]

## Sheet: Granule Fmr1 KO TRAP DESeq2 
Ensembl Gene	Gene Symbol	WT TRAP Rep1 counts	WT TRAP Rep2 counts	WT TRAP Rep3 counts	KO TRAP Rep1 counts	KO TRAP Rep2 counts	KO TRAP Rep3 counts	baseMean	log2FoldChange	lfcSE	stat	pvalue	padj
[truncated: 16,346 more rows]
