# Supplementary material for: FMRP has a cell-type-specific role in CA1 pyramidal neurons to regulate autism-related transcripts and circadian memory
Source: eLife. 2019 Dec 20;8:e46919. doi: 10.7554/eLife.46919 (PMC6924960; doi:10.7554/eLife.46919)
Supplement: Supplementary file 4. [file elife-46919-supp4.xlsx]

## Sheet: Sheet1
primer	barcode	sequence
RT-1T:	(CGTGAT)	/5Phos/DDDCGTGATNNNNNNNAGATCGGAAGAGCGTCGT/iSp18/CACTCA/iSp18/CCGCTGGAAGTGACTGAC-3
RT-2T:	(ACATCG)	/5Phos/DDDACATCGNNNNNNNAGATCGGAAGAGCGTCGT/iSp18/CACTCA/iSp18/CCGCTGGAAGTGACTGAC-3
RT-3T:	(GCCTAA)	/5Phos/DDDGCCTAANNNNNNNAGATCGGAAGAGCGTCGT/iSp18/CACTCA/iSp18/CCGCTGGAAGTGACTGAC-3
RT-4T:	(TGGTCA)	/5Phos/DDDTGGTCANNNNNNNAGATCGGAAGAGCGTCGT/iSp18/CACTCA/iSp18/CCGCTGGAAGTGACTGAC-3
RT-5T:	(CACTGT)	/5Phos/DDDCACTGTNNNNNNNAGATCGGAAGAGCGTCGT/iSp18/CACTCA/iSp18/CCGCTGGAAGTGACTGAC-3
RT-6T:	(ATTGGC)	/5Phos/DDDATTGGCNNNNNNNAGATCGGAAGAGCGTCGT/iSp18/CACTCA/iSp18/CCGCTGGAAGTGACTGAC-3
RT-7T:	(GATCTG)	/5Phos/DDDGATCTGNNNNNNNAGATCGGAAGAGCGTCGT/iSp18/CACTCA/iSp18/CCGCTGGAAGTGACTGAC-3
RT-8T:	(TCAAGT)	/5Phos/DDDTCAAGTNNNNNNNAGATCGGAAGAGCGTCGT/iSp18/CACTCA/iSp18/CCGCTGGAAGTGACTGAC-3
RT-9T:	(CTGATC)	/5Phos/DDDCTGATCNNNNNNNAGATCGGAAGAGCGTCGT/iSp18/CACTCA/iSp18/CCGCTGGAAGTGACTGAC-3
RT-10T:	(AAGCTA)	/5Phos/DDDAAGCTANNNNNNNAGATCGGAAGAGCGTCGT/iSp18/CACTCA/iSp18/CCGCTGGAAGTGACTGAC-3
RT-11T:	(GTAGCC)	/5Phos/DDDGTAGCCNNNNNNNAGATCGGAAGAGCGTCGT/iSp18/CACTCA/iSp18/CCGCTGGAAGTGACTGAC-3
RT-12T:	(TACAAG)	/5Phos/DDDTACAAGNNNNNNNAGATCGGAAGAGCGTCGT/iSp18/CACTCA/iSp18/CCGCTGGAAGTGACTGAC-3
RT-13T:	(CGTGAT)	/5Phos/DDDCGTGATNNNNNNNAGATCGGAAGAGCGTCGT/iSp18/CACTCA/iSp18/CCGCTGGAAGTGACTGAC-3
RT-14T:	(GGAACT)	/5Phos/DDDGGAACTNNNNNNNAGATCGGAAGAGCGTCGT/iSp18/CACTCA/iSp18/CCGCTGGAAGTGACTGAC-3
RT-15T:	(TGACAT)	/5Phos/DDDTGACATNNNNNNNAGATCGGAAGAGCGTCGT/iSp18/CACTCA/iSp18/CCGCTGGAAGTGACTGAC-3
RT-16T:	(GGACGG)	/5Phos/DDDGGACGGNNNNNNNAGATCGGAAGAGCGTCGT/iSp18/CACTCA/iSp18/CCGCTGGAAGTGACTGAC-3
RT-18T:	(GCGGAC)	/5Phos/DDDGCGGACNNNNNNNAGATCGGAAGAGCGTCGT/iSp18/CACTCA/iSp18/CCGCTGGAAGTGACTGAC-3
RT-19T:	(TTTCAC)	/5Phos/DDDTTTCACNNNNNNNAGATCGGAAGAGCGTCGT/iSp18/CACTCA/iSp18/CCGCTGGAAGTGACTGAC-3
RT-20T:	(GGCCAC)	/5Phos/DDDGGCCACNNNNNNNAGATCGGAAGAGCGTCGT/iSp18/CACTCA/iSp18/CCGCTGGAAGTGACTGAC-3
RT-21T:	(CGAAAC)	/5Phos/DDDCGAAACNNNNNNNAGATCGGAAGAGCGTCGT/iSp18/CACTCA/iSp18/CCGCTGGAAGTGACTGAC-3
RT-22T:	(CGTACG)	/5Phos/DDDCGTACGNNNNNNNAGATCGGAAGAGCGTCGT/iSp18/CACTCA/iSp18/CCGCTGGAAGTGACTGAC-3
RT-23T:	(CCACTC)	/5Phos/DDDCCACTCNNNNNNNAGATCGGAAGAGCGTCGT/iSp18/CACTCA/iSp18/CCGCTGGAAGTGACTGAC-3
RT-25T:	(ATCAGT)	/5Phos/DDDATCAGTNNNNNNNAGATCGGAAGAGCGTCGT/iSp18/CACTCA/iSp18/CCGCTGGAAGTGACTGAC-3
RT-27T:	(AGGAAT)	/5Phos/DDDAGGAATNNNNNNNAGATCGGAAGAGCGTCGT/iSp18/CACTCA/iSp18/CCGCTGGAAGTGACTGAC-3
