# Supplementary material for: FMRP has a cell-type-specific role in CA1 pyramidal neurons to regulate autism-related transcripts and circadian memory
Source: eLife. 2019 Dec 20;8:e46919. doi: 10.7554/eLife.46919 (PMC6924960; doi:10.7554/eLife.46919)
Supplement: Supplementary file 5. — CLIP normalized to FACS RNA-Seq. CLIP scores determined from linear model using FACS RNA-Seq transcript RPKM. This table is equivalent to Supplementary file 2 CA1 CLIP but using RPKM per transcript from RNA-Seq of sorted CA1 pyramidal cells to normalize for abundance instead of TRAP. Counts and negative binomial. FMRP targets determined using a count-based method in which the FMRP CLIP read counts driven by mRNA abundance are modelled as following a negative binomial distribution. Reads from CLIP and TRAP replicates that mapped within the coding region of each transcript were counted. For CLIP the final read count was calculated by subtracting the number of CLIP reads in the Cre negative control (‘Neg CLIP CDS reads’) from the number of CLIP reads from the Camk2a-Cre sample (‘Camk2a CLIP CDS reads’). The mean TRAP counts normalized by library size across all three replicates are shown (‘mean normalized TRAP counts’). CLIP scores were derived from a linear regression model as the difference between the observed and fitted values. An estimated dispersion parameter for each CLIP count is given, along with individual p-values per replicate, combined p-value and FDR per transcript. [file elife-46919-supp5.xlsx]

## Sheet: CLIP normalized to FACS RNA-Seq
RefSeq Transcript	Gene Symbol	Start Codon	Stop Codon	Transcript Length	CDS Length	FACS RPKM	FACS RPKM	FACS RPKM	mean FACS RPKM	Camk2a CLIP CDS reads	Neg CLIP CDS reads	Camk2a CLIP CDS reads	Neg CLIP CDS reads	Camk2a CLIP CDS reads	Neg CLIP CDS reads	CDS reads (Camk2a - Neg)	CDS reads (Camk2a - Neg)	CDS reads (Camk2a - Neg)	CLIP RPKM	CLIP RPKM	CLIP RPKM	CLIP Score	CLIP Score	CLIP Score	Mean CLIP Score
						replicate 1	replicate 2	replicate 3		replicate 1	replicate 1	replicate 2	replicate 2	replicate 3	replicate 3	replicate 1	replicate 2	replicate 3	replicate 1	replicate 2	replicate 3	replicate 1	replicate 2	replicate 3
NM_001039000	Kif5a	467	3551	6311	3084	95.0381	64.6923	66.8256	75.5187	2861	154	2529	283	5265	120	2707	2246	5145	9985.51	10420	7254.75	7.74566	7.61904	7.5023	7.62233
NM_007462	Apc	311	8840	12449	8529	30.1131	26.4355	34.0077	30.1854	1794	146	1329	162	3614	64	1648	1167	3550	2198.14	1957.7	1810.01	6.10879	5.75664	6.17831	6.01458
NM_001204165	Rapgef4	72	3108	4206	3036	26.9673	19.5249	21.3291	22.6071	517	39	479	65	1127	16	478	414	1111	1791.11	1951.06	1591.34	5.9857	5.92505	6.2066	6.03911
NM_001294150	Kif1a	59	5156	8158	5097	96.2013	92.6382	82.8531	90.5642	768	47	606	91	1767	25	721	515	1742	1609.23	1445.66	1486.23	5.00388	4.66057	5.08052	4.91499
NM_016965	Nckap1	217	3604	4387	3387	130.477	122.474	122.954	125.302	582	49	473	46	1331	28	533	427	1303	1790.23	1803.79	1672.94	4.96411	4.78525	5.01088	4.92008
NM_008960	Pten	868	2080	8212	1212	37.78	31.8795	35.9394	35.1996	113	7	71	8	202	6	106	63	196	994.946	743.722	703.242	4.87358	4.26819	4.70063	4.61413
NM_133769	Cyfip2	155	3917	6368	3762	134.017	121.42	128.295	127.911	591	32	407	31	1247	24	559	376	1223	1690.4	1430.02	1413.71	4.86904	4.4379	4.75271	4.68655
NM_001081154	Marf1	190	5401	7765	5211	17.0823	16.89	18.46	17.4774	348	18	232	12	659	9	330	220	650	720.426	604.052	542.43	4.82519	4.38781	4.8444	4.6858
NM_001143849	Pde2a	100	2887	4053	2787	88.1575	93.5205	80.0765	87.2515	351	13	237	20	645	11	338	217	634	1379.67	1114.03	989.245	4.80406	4.30697	4.52085	4.54396
NM_011767	Zfr	60	3285	4596	3225	55.6089	50.5342	52.9707	53.0379	346	30	222	20	612	10	316	202	602	1114.69	896.178	811.742	4.79313	4.29145	4.6041	4.56289
NM_021523	Huwe1	453	13590	14624	13137	16.9796	16.1039	18.3367	17.1401	846	68	668	74	1761	39	778	594	1722	673.72	646.938	570.018	4.74011	4.49845	4.9304	4.72299
NM_011245	Rasgrf1	223	4012	4228	3789	87.9709	78.4134	81.7207	82.7016	456	27	286	25	802	9	429	261	793	1288.04	985.572	910.123	4.73683	4.16232	4.44024	4.44646
NM_011049	Cdk16	387	1878	3112	1491	35.4715	33.1408	29.1406	32.5843	120	6	83	4	247	7	114	79	240	869.808	758.092	699.979	4.72569	4.34209	4.75108	4.60628
NM_001024624	Cdkl5	258	3075	3246	2817	6.70326	5.00358	5.10688	5.60457	105	6	55	2	183	5	99	53	178	399.802	269.192	274.78	4.65365	3.90356	4.70529	4.42083
NM_001168572	Brsk1	152	1184	1368	1032	10.7008	6.15887	5.82121	7.56028	41	1	39	3	83	2	40	36	81	440.937	499.109	341.316	4.61649	4.61484	4.79651	4.67595
NM_177751	Cnksr2	357	3456	5504	3099	43.8297	40.8327	45.1179	43.2601	265	21	185	11	428	6	244	174	422	895.704	803.342	592.164	4.59906	4.25584	4.29994	4.38495
NM_010585	Itpr1	350	8600	9877	8250	26.0274	28.9926	29.7987	28.2729	549	29	493	48	1161	12	520	445	1149	717.044	771.753	605.644	4.53166	4.45293	4.64732	4.54397
NM_080455	Tshz2	94	3187	5113	3093	14.7046	9.60901	16.9734	13.7624	145	3	74	11	237	2	142	63	235	522.282	291.429	330.4	4.50364	3.47954	4.3061	4.09642
NM_026361	Pkp4	284	3857	4614	3573	39.3129	38.5888	40.2599	39.3872	265	12	158	19	457	6	253	139	451	805.534	556.614	548.902	4.5019	3.78272	4.25993	4.18152
NM_001110796	Pclo	304	14896	16895	14592	33.7296	34.7399	36.3419	34.9371	1025	65	694	68	1955	53	960	626	1902	748.433	613.807	566.823	4.4673	3.9957	4.39505	4.28602
NM_010437	Hivep2	833	8126	9768	7293	79.5039	79.3437	77.7654	78.871	703	33	476	38	1377	15	670	438	1362	1045.12	859.291	812.124	4.46359	3.99294	4.31099	4.25584
NM_008170	Grin2a	0	4395	4512	4395	42.2873	45.1081	40.8458	42.7471	325	14	232	29	631	13	311	203	618	805.004	660.86	611.478	4.45215	3.98132	4.35508	4.26285
NM_010897	Nf1	108	8634	11847	8526	10.1289	10.2307	12.4012	10.9203	366	30	292	38	796	14	336	254	782	448.322	426.247	398.853	4.42124	4.16675	4.74901	4.44567
NM_008634	Map1b	115	7510	11852	7395	346.27	348.896	329.604	341.59	1237	65	882	100	2639	59	1172	782	2580	1802.96	1513.01	1517.17	4.37646	3.93044	4.12735	4.14475
NM_009481	Usp9x	394	8059	11903	7665	24.7346	24.1857	26.843	25.2544	430	36	353	45	1056	30	394	308	1026	584.764	574.925	582.085	4.30476	4.09585	4.67367	4.35809
NM_007864	Dlg4	315	2490	3327	2175	126.012	121.464	113.475	120.317	211	2	177	20	503	10	209	157	493	1093.16	1032.79	985.687	4.27667	4.0051	4.27774	4.18651
NM_011807	Dlg2	221	2780	7409	2559	46.0279	45.6651	47.7093	46.4674	178	14	131	14	341	7	164	117	334	729.071	654.166	567.581	4.25946	3.91661	4.18582	4.12063
NM_008632	Map2	447	1851	5427	1404	91.1877	87.1075	97.3256	91.8736	125	8	105	15	270	4	117	90	266	948.015	917.166	823.884	4.23194	3.9955	4.21875	4.14873
NM_009167	Shc3	0	1425	1540	1425	1.16395	1.91155	1.16085	1.41212	21	0	19	2	42	1	21	17	41	167.649	170.689	125.118	4.22159	4.07266	4.5909	4.29505
NM_001291452	Lrrc7	1289	5777	7321	4488	28.8097	27.5925	30.8788	29.0937	239	11	186	28	484	12	228	158	472	577.934	503.706	457.342	4.20344	3.82022	4.22093	4.08153
NM_021494	Dennd5a	240	4104	4956	3864	25.2272	20.6871	23.7089	23.2077	191	13	196	22	539	11	178	174	528	524.058	644.295	594.221	4.19702	4.31086	4.76601	4.42463
NM_001290760	Tbc1d9b	79	3871	5249	3792	19.5314	17.5984	18.7938	18.6412	168	9	153	22	355	10	159	131	345	477.007	494.283	395.642	4.19192	4.05983	4.34143	4.19773
NM_001253369	Kcnma1	80	3710	5037	3630	11.2097	9.12925	13.2932	11.2107	126	7	134	16	301	1	119	118	300	372.938	465.102	359.39	4.13999	4.27687	4.57927	4.33204
NM_001164503	Akap11	201	5886	9416	5685	61.9324	53.1591	63.7924	59.628	394	23	303	30	844	16	371	273	828	742.403	687.076	633.361	4.13694	3.83793	4.15939	4.04475
NM_001160222	Pum2	55	3013	5876	2958	39.9703	33.9461	33.3833	35.7666	174	19	131	16	415	5	155	115	410	596.115	556.253	602.75	4.12503	3.83959	4.46634	4.14365
NM_172679	4932438A13Rik	372	15390	15883	15018	5.30735	4.93394	6.32353	5.52161	398	35	293	39	923	15	363	254	908	274.973	241.988	262.921	4.12255	3.7588	4.65268	4.17801
NM_146019	Chd3	35	6203	7281	6168	54.2431	58.8203	48.8829	53.9821	412	31	376	53	754	18	381	323	736	702.711	749.257	518.902	4.11697	4.02255	3.94547	4.02833
NM_138659	Prpf8	315	7323	7481	7008	12.2997	10.9638	10.71	11.3245	240	15	149	22	502	11	225	127	491	365.245	259.288	304.676	4.1039	3.42782	4.33352	3.95508
NM_001290995	Kif1b	374	5825	10274	5451	82.5041	80.9195	87.1597	83.5278	420	23	352	50	1182	22	397	302	1160	828.535	792.69	925.408	4.09437	3.84216	4.4569	4.13114
NM_001001983	Pi4ka	78	6213	6431	6135	7.95143	8.71304	6.97484	7.87977	172	6	117	12	477	7	166	105	470	307.815	244.877	333.146	4.07331	3.56273	4.73091	4.12232
NM_178655	Ank2	267	3420	5770	3153	97.7963	107.931	109.961	105.229	262	17	262	22	672	9	245	240	663	883.972	1089.08	914.41	4.05011	4.16199	4.26866	4.16025
NM_181421	Gm15800	253	13510	15482	13257	30.0124	29.0591	28.1327	29.0681	639	35	500	59	1490	38	604	441	1452	518.308	475.955	476.292	4.04687	3.73899	4.28016	4.02201
NM_001173506	Map1a	463	8794	11539	8331	140.252	119.263	117.66	125.725	744	49	764	84	2306	47	695	680	2259	949.039	1167.84	1179.15	4.04649	4.15604	4.50374	4.23543
NM_177379	Arhgap32	383	5606	9969	5223	33.2241	26.4441	31.1702	30.2795	253	13	164	19	553	10	240	145	543	522.742	397.21	452.097	4.03482	3.45359	4.17471	3.88771
NM_021287	Sptbn2	444	7611	8235	7167	122.831	119.384	116.339	119.518	599	37	688	72	1675	24	562	616	1651	892.062	1229.75	1001.75	3.98736	4.26091	4.30601	4.18476
NM_001302958	Ttll7	397	2227	2265	1830	1.89053	1.29969	2.08081	1.75701	29	4	34	2	84	0	25	32	84	155.412	250.191	199.609	3.98198	4.49332	5.103	4.5261
NM_001190401	Usp34	79	10828	12200	10749	15.3129	16.6243	16.4517	16.1296	394	28	299	31	774	23	366	268	751	387.355	356.73	303.825	3.97784	3.67607	4.06762	3.90718
NM_009706	Arhgap5	171	4683	5197	4512	14.8119	11.8367	16.4802	14.3762	161	16	123	23	361	6	145	100	355	365.591	317.105	342.145	3.96302	3.57519	4.32419	3.95413
NM_001033263	Agap2	715	4276	5634	3561	219.827	199.633	176.596	198.685	354	17	375	51	1018	25	337	324	993	1076.6	1301.8	1212.63	3.95562	4.03838	4.20532	4.06644
NM_001002004	2610507B11Rik	96	6801	7443	6705	29.5149	30.3998	26.1366	28.6838	313	32	303	45	862	19	281	258	843	476.764	550.546	546.739	3.93427	3.95701	4.48902	4.12677
NM_010864	Myo5a	427	5989	11684	5562	31.7012	28.9569	33.1603	31.2728	254	16	181	22	583	14	238	159	569	486.791	409.014	444.87	3.91278	3.47649	4.12756	3.83895
NM_030595	Nbea	466	9277	10983	8811	39.9309	39.6779	37.6443	39.0844	435	22	377	48	1124	30	413	329	1094	533.238	534.248	539.938	3.91133	3.72818	4.24189	3.96047
NM_013881	Ulk2	516	3630	5813	3114	16.934	16.0481	15.0413	16.0078	104	6	62	7	215	4	98	55	211	358.017	252.707	294.656	3.86873	3.18325	4.02902	3.69367
NM_012005	Med14	274	4588	5080	4314	7.47849	7.19363	8.12594	7.59935	99	1	61	7	204	3	98	54	201	258.43	179.096	202.613	3.84262	3.13313	4.04031	3.67202
NM_181517	Ipo7	0	3117	3117	3117	4.53664	3.54976	2.97195	3.68612	58	6	42	7	116	3	52	35	113	189.785	160.659	157.65	3.82852	3.41011	4.21396	3.81753
NM_133207	Kcnh7	210	3798	3798	3588	4.33937	6.25417	7.91627	6.16994	81	7	50	5	158	2	74	45	156	234.626	179.446	189.07	3.82743	3.26086	4.09478	3.72769
NM_009441	Ttc3	134	6074	7295	5940	132.078	122.104	134.983	129.722	473	42	394	52	1037	24	431	342	1013	825.443	823.782	741.608	3.82654	3.63377	3.81155	3.75729
NM_173028	Vps13a	164	9665	11164	9501	3.73747	3.72798	4.94952	4.13832	168	6	138	14	352	5	162	124	347	193.973	186.735	158.822	3.79103	3.55773	4.13897	3.82924
NM_172882	Wdfy3	545	11072	14277	10527	18.2048	17.3129	19.3515	18.2898	335	9	232	29	787	19	326	203	768	352.297	275.908	317.255	3.76605	3.23008	4.03697	3.6777
NM_172827	Lnpep	77	3155	5181	3078	5.55479	4.859	7.90479	6.10619	69	9	62	6	145	4	60	56	141	221.758	260.311	199.206	3.75224	3.80377	4.1778	3.91127
NM_175510	Unc80	0	9981	13533	9981	36.362	33.7692	41.5394	37.2235	418	17	302	35	849	15	401	267	834	457.053	382.745	363.365	3.718	3.2763	3.70664	3.56698
NM_007907	Eef2	96	2673	3100	2577	120.077	115.165	105.428	113.557	175	11	168	21	464	10	164	147	454	723.979	816.16	766.113	3.71666	3.70015	3.95699	3.79126
NM_175836	Sptbn1	46	7138	8239	7092	103.97	101.214	102.376	102.52	475	45	428	51	1075	29	430	377	1046	689.757	760.58	641.379	3.70775	3.65969	3.7763	3.71458
NM_011785	Akt3	46	1486	4735	1440	42.0728	37.0024	39.231	39.4354	59	1	34	5	90	3	58	29	87	458.207	288.143	262.729	3.68722	2.8321	3.19605	3.23846
NM_008963	Ptgds	76	646	806	570	1.54439	0.251886	1.20982	1.00203	5	0	18	4	24	2	5	14	22	99.791	351.419	167.841	3.67765	5.32014	5.2687	4.7555
NM_001039386	Nsmf	222	1821	2933	1599	188.793	194.056	164.237	182.362	126	7	119	16	329	7	119	103	322	846.632	921.64	875.707	3.66006	3.59153	3.79917	3.68359
NM_007561	Bmpr2	374	3491	11087	3117	31.9173	29.0513	31.9555	30.9747	122	11	65	9	244	2	111	56	242	405.119	257.054	337.621	3.65354	2.81215	3.73668	3.40079
NM_001171054	Mta3	95	1637	1727	1542	2.1335	1.82213	0.846942	1.60086	17	1	16	1	18	0	16	15	18	118.041	139.181	50.7621	3.64065	3.70305	3.19656	3.51342
NM_177407	Camk2a	147	1584	4956	1437	616.021	598.389	603.805	606.072	191	19	141	21	405	7	172	120	398	1361.66	1194.8	1204.42	3.62963	3.24607	3.36979	3.41516
NM_008982	Ptprj	60	4113	7634	4053	42.9298	41.8859	41.4919	42.1025	172	13	108	12	292	6	159	96	286	446.29	338.897	306.86	3.61019	3.02693	3.37161	3.33624
NM_172739	Arhgap35	713	5213	8393	4500	35.3576	31.4097	32.9762	33.2478	171	12	144	21	376	4	159	123	372	401.958	391.08	359.486	3.60002	3.37509	3.77478	3.58329
NM_001282093	Wac	354	2160	5049	1806	24.0919	22.6784	25.976	24.2488	60	4	24	2	112	2	56	22	110	352.75	174.292	264.866	3.59978	2.39834	3.56778	3.18863
NM_172887	Fry	339	9402	10730	9063	21.2669	22.3455	23.6129	22.4084	290	18	234	20	669	8	272	214	661	341.423	337.843	317.162	3.59975	3.4005	3.88618	3.62881
NM_030238	Dync1h1	210	14145	14398	13935	24.6224	22.5186	21.6157	22.9189	445	25	407	51	1131	23	420	356	1108	342.877	365.524	345.768	3.59245	3.50061	3.99408	3.69571
NM_011246	Rasgrp1	168	2556	5105	2388	176.02	185.581	183.307	181.636	182	13	127	8	414	1	169	119	413	805.098	712.993	752.085	3.58986	3.22361	3.58257	3.46535
NM_001102430	Arfgef1	176	5717	7042	5541	14.9897	15.0348	17.1704	15.7316	150	9	103	13	305	7	141	90	298	289.486	232.395	233.873	3.57257	3.0728	3.7086	3.45132
NM_145599	Tmem184c	428	2297	2682	1869	26.5294	29.6355	24.4808	26.8819	62	3	37	4	121	3	59	33	118	359.12	252.625	274.552	3.56414	2.87204	3.54328	3.32648
NM_028906	Dpp8	287	2966	4764	2679	26.2857	22.3518	26.5406	25.0594	92	10	88	4	202	3	82	84	199	348.207	448.62	323.022	3.56147	3.74262	3.82981	3.7113
NM_172768	Gramd1b	94	2731	2814	2637	3.11417	2.66942	3.58073	3.12144	35	1	14	3	72	1	34	11	71	146.678	59.6836	117.085	3.55593	2.08119	3.90789	3.18167
NM_023328	Agtpbp1	158	3815	4417	3657	25.5889	31.7147	29.1408	28.8148	122	4	90	5	279	6	118	85	273	367.074	332.557	324.63	3.55435	3.22701	3.73359	3.50498
NM_022656	Nisch	164	4946	5586	4782	134.06	125.934	112.768	124.254	296	16	249	21	703	13	280	228	690	666.108	682.178	627.467	3.5428	3.38747	3.60232	3.51086
NM_001128308	Dock9	467	6596	8182	6129	31.3219	34.8003	32.4561	32.8594	230	23	185	27	557	10	207	158	547	384.217	368.842	388.105	3.5419	3.29767	3.89399	3.57785
NM_001081035	Nav3	0	7101	7782	7101	4.67713	4.05675	5.40894	4.71427	119	12	96	11	268	4	107	85	264	171.42	171.266	161.672	3.53502	3.35487	4.06816	3.65268
NM_009622	Adcy1	111	3468	12259	3357	189.86	182.675	200.036	190.857	246	14	222	16	544	12	232	206	532	786.2	877.988	689.147	3.52607	3.49424	3.41982	3.48004
NM_198111	Akap6	94	7018	10263	6924	29.7302	27.8923	24.9408	27.5211	236	22	222	30	561	7	214	192	554	351.603	396.75	347.94	3.51961	3.50918	3.86764	3.63214
NM_008729	Ctnnd2	534	4275	5947	3741	25.1929	26.5766	23.256	25.0085	117	6	74	13	254	7	111	61	247	337.545	233.3	287.118	3.51782	2.80053	3.66133	3.32656
NM_001024952	Rc3h1	439	3832	11011	3393	6.68797	6.00155	6.83373	6.50775	60	3	30	6	94	2	57	24	92	191.112	101.205	117.911	3.49971	2.40263	3.37409	3.09214
NM_010418	Herc2	169	14680	15348	14511	13.3497	13.0823	13.6068	13.3462	362	34	352	44	1038	13	328	308	1025	257.142	303.687	307.169	3.49967	3.55738	4.22366	3.76024
NM_029633	Clasp2	147	4008	5624	3861	42.443	37.6872	46.467	42.1991	149	9	112	9	365	3	140	103	362	412.501	381.689	407.718	3.49524	3.19711	3.7799	3.49075
NM_170728	Ank3	514	5695	9320	5181	80.4247	105.736	98.7668	94.9758	288	27	277	21	703	15	261	256	688	573.091	706.967	577.466	3.486	3.60005	3.68145	3.58917
NM_175514	Fam171b	21	2487	3394	2466	71.0193	66.487	66.7026	68.0696	114	6	71	8	222	3	108	63	219	498.227	365.527	386.191	3.48261	2.84806	3.34765	3.22611
NM_001025432	Crebbp	181	7507	7507	7326	15.2551	14.0088	13.4007	14.2215	179	12	138	13	432	11	167	125	421	259.326	244.127	249.9	3.47401	3.20435	3.87894	3.5191
NM_027258	Rnf157	248	2294	4655	2046	51.1604	47.0806	51.4963	49.9124	82	4	45	5	158	1	78	40	157	433.696	279.722	333.692	3.46745	2.64807	3.36656	3.16069
NM_080633	Aco2	50	2393	2768	2343	50.4928	52.442	54.1338	52.3562	98	7	91	10	267	4	91	81	263	441.84	494.635	488.129	3.4658	3.44179	3.87991	3.59583
NM_019933	Ptpn4	187	2968	4707	2781	2.35892	1.76839	3.55629	2.5612	32	1	27	3	84	3	31	24	81	126.811	123.476	126.659	3.46389	3.2486	4.16775	3.62675
NM_001286263	Ralgapa1	749	6998	8403	6249	25.0408	26.9872	26.3225	26.1168	190	11	153	15	438	7	179	138	431	325.866	315.967	299.929	3.44117	3.21212	3.69219	3.44849
NM_008449	Kif5c	348	3219	6840	2871	99.0875	95.1731	96.9886	97.0831	157	16	139	18	369	15	141	121	354	558.705	603.01	536.194	3.43624	3.35743	3.55823	3.45063
NM_033565	Aff4	367	3850	10165	3483	40.1514	31.0772	37.9237	36.3841	129	15	95	11	236	5	114	84	231	372.347	345.063	288.41	3.43588	3.14045	3.39022	3.32218
NM_001193305	Mical2	335	3644	3680	3309	37.7088	36.3009	33.0779	35.6958	113	6	96	7	278	5	107	89	273	367.861	384.827	358.771	3.42978	3.30925	3.7193	3.48611
NM_001029934	Usp32	187	5002	6924	4815	19.2578	17.0943	19.5285	18.6269	128	9	127	12	303	5	119	115	298	281.156	341.723	269.136	3.42974	3.52778	3.78614	3.58122
NM_001291137	Ralgapb	281	4805	8414	4524	20.5225	18.362	22.2319	20.3721	123	7	88	9	258	10	116	79	248	291.697	249.849	238.386	3.42945	3.02231	3.54479	3.33218
NM_001029889	Usf3	299	6965	12606	6666	13.5794	11.5634	14.349	13.1639	147	5	85	12	213	2	142	73	211	242.337	156.686	137.648	3.42232	2.61092	3.07578	3.03634
NM_010432	Hipk1	283	3916	8049	3633	19.7087	18.5263	20.494	19.5763	98	7	63	11	258	5	91	52	253	284.952	204.791	302.835	3.41945	2.7593	3.91953	3.36609
NM_011162	Mapk8ip1	137	2261	2934	2124	69.3073	66.5316	55.1146	63.6512	88	2	70	6	227	4	86	64	223	460.617	431.12	456.564	3.40938	3.1264	3.63884	3.39154
NM_013507	Eif4g2	332	3053	7760	2721	42.3996	40.8395	46.033	43.0907	103	10	86	19	319	9	93	67	310	388.822	352.305	495.433	3.39749	3.069	4.04554	3.50401
NM_001013806	Ankrd13c	61	1687	2654	1626	8.8176	9.02651	6.9196	8.25457	32	4	19	3	83	2	28	16	81	195.9	140.79	216.629	3.39366	2.73637	4.07557	3.40187
NM_001081109	Lmtk2	238	4654	8114	4416	40.4454	36.956	37.0144	38.1386	154	11	127	10	365	7	143	117	358	368.386	379.079	352.538	3.39238	3.24786	3.64501	3.42841
NM_172771	Dmxl2	189	9354	10614	9165	35.8446	33.6741	38.2793	35.9327	308	22	241	23	717	18	286	218	699	355.001	340.327	331.662	3.3745	3.128	3.60106	3.36785
NM_011749	Zfp148	487	2872	9431	2385	23.1719	18.384	21.0063	20.854	61	2	40	8	97	0	59	32	97	281.423	191.97	176.862	3.36378	2.62813	3.09681	3.02957
NM_001128180	Dlgap1	78	2127	5306	2049	226.669	243.827	243.839	238.112	146	8	97	11	317	9	138	86	308	766.185	600.522	653.673	3.35699	2.81364	3.17979	3.11681
NM_010239	Fth1	224	773	942	549	453.196	465.955	430.106	449.752	57	9	37	6	111	5	48	31	106	994.638	807.908	839.624	3.35435	2.86038	3.07012	3.09495
NM_001252313	Ncor1	70	7435	8852	7365	29.7724	29.265	29.7792	29.6055	222	13	170	10	480	8	209	160	472	322.827	310.828	278.69	3.3529	3.1133	3.4934	3.31987
NM_001081360	Camsap2	667	5104	7823	4437	35.2733	29.7925	32.0343	32.3667	140	10	91	10	280	5	130	81	275	333.311	261.197	269.522	3.34585	2.80887	3.37913	3.17795
NM_207215	Mycbp2	283	14524	15233	14241	43.8914	49.9587	51.9467	48.5989	529	37	408	55	1122	27	492	353	1095	393.026	354.656	334.368	3.34129	3.00648	3.38922	3.24566
NM_001164225	Fbxl16	316	1756	3499	1440	272.28	239.516	223.69	245.162	104	7	93	8	270	2	97	85	268	766.312	844.557	809.327	3.33984	3.28813	3.46635	3.36477
NM_001185020	Wnk1	1023	7410	9811	6387	19.8028	18.6341	20.524	19.6537	170	20	129	16	442	15	150	113	427	267.172	253.136	290.725	3.32415	3.0627	3.85773	3.41486
NM_007567	Bsn	125	11954	15937	11829	80.7714	72.1596	68.1912	73.7074	510	34	439	60	1430	26	476	379	1404	457.778	458.42	516.144	3.31302	3.12705	3.70719	3.38242
NM_175654	Hist1h4d	0	312	368	312	0.270605	5.79269	0.883254	2.31552	3	0	0	0	2	0	3	0	2	109.386	1	27.8758	3.31076	-3.63903	2.05855	0.576759
NM_001024602	Cep170b	236	4961	6640	4725	31.0671	26.1266	26.5317	27.9084	132	5	102	19	296	5	127	83	291	305.772	251.333	267.82	3.30979	2.84217	3.47971	3.21056
NM_001134383	Iqsec1	257	3143	4526	2886	44.5987	42.5687	42.2635	43.1437	99	7	65	5	210	3	92	60	207	362.65	297.459	311.907	3.29623	2.82413	3.37706	3.1658
NM_001003908	Cltc	203	5231	6144	5028	42.5949	39.1237	45.3381	42.3522	175	16	131	19	412	14	159	112	398	359.748	318.71	344.223	3.29567	2.93478	3.53299	3.25448
NM_172579	Sipa1l1	401	5750	7492	5349	62.6977	59.4536	59.4586	60.5366	213	17	175	22	453	13	196	153	440	416.85	409.253	357.71	3.29525	3.08138	3.32396	3.23353
NM_026484	Ccny	479	1505	4017	1026	33.628	30.0714	33.7822	32.4939	31	2	17	2	58	0	29	15	58	321.549	209.178	245.828	3.29168	2.48611	3.24348	3.00709
NM_001034115	Shank1	76	6580	7596	6504	130.306	120.673	122.06	124.346	335	16	285	20	771	16	319	265	755	557.964	582.959	504.798	3.28677	3.16027	3.28793	3.24499
NM_172406	Trak2	444	3186	6240	2742	32.0053	33.1046	33.1809	32.7636	85	8	80	7	203	0	77	73	203	319.462	380.915	321.944	3.27736	3.34589	3.62651	3.41659
NM_008904	Ppargc1a	139	2533	6464	2394	6.33945	5.60629	7.24094	6.39556	34	0	15	0	53	1	34	15	52	161.566	89.6478	94.4562	3.26778	2.23812	3.06698	2.85763
NM_194340	Prr14l	305	6221	10546	5916	22.0345	20.2616	19.7562	20.6841	140	5	125	9	291	1	135	116	290	259.598	280.545	213.168	3.2522	3.18038	3.37223	3.26827
NM_153413	Dock3	401	6494	9063	6093	31.568	28.8973	32.242	30.9024	171	7	110	10	401	3	164	100	398	306.203	234.823	284.056	3.25107	2.68306	3.48918	3.1411
NM_178679	Zfp365	305	1532	4257	1227	66.5404	53.9861	65.5878	62.0381	44	0	38	3	89	2	44	35	87	407.948	408.128	308.337	3.2495	3.06272	3.09154	3.13459
NM_001160319	Ubr4	28	15571	15873	15543	7.4563	6.99628	7.40258	7.28505	241	12	206	25	687	11	229	181	676	167.609	166.616	189.131	3.24312	3.05425	3.97224	3.4232
NM_001081030	Sbf1	195	5799	6190	5604	15.8463	16.0383	16.0944	15.993	123	9	108	23	413	8	114	85	405	231.421	217.017	314.274	3.23978	2.96415	4.1227	3.44221
NM_007772	Hivep1	173	8240	8753	8067	2.54844	1.94832	3.4535	2.65009	79	1	54	11	134	3	78	43	131	109.996	76.2656	70.6172	3.23833	2.53303	3.29964	3.02366
NM_001281491	Syngap1	0	4023	4023	4023	96.1542	94.0917	87.0564	92.4341	175	7	113	12	382	8	168	101	374	475.068	359.206	404.271	3.23154	2.63948	3.18713	3.01938
NM_001159634	Prrc2b	198	6891	10686	6693	79.3371	69.5352	67.6629	72.1784	263	12	221	39	639	15	251	182	624	426.628	389.066	405.429	3.22384	2.90296	3.37439	3.16706
NM_133833	Dst	0	16140	17210	16140	18.0012	18.4086	20.5486	18.9862	375	27	350	62	1019	16	348	288	1003	245.286	255.306	270.24	3.22144	3.09573	3.7779	3.36502
NM_001100591	Rc3h2	239	3803	8967	3564	21.7611	20.0824	22.9451	21.5962	87	6	71	5	168	3	81	66	165	258.549	264.959	201.325	3.22063	3.07205	3.25782	3.1835
NM_001139509	Nr4a2	299	2096	3026	1797	13.6243	12.2778	13.0509	12.9843	36	3	11	1	37	0	33	10	37	208.911	79.6204	89.5375	3.21639	1.64248	2.46554	2.44147
NM_001037877	Tcf25	162	2043	3062	1881	85.5168	87.8185	89.9108	87.7487	82	6	82	11	223	5	76	71	218	459.643	540.06	503.987	3.21493	3.25897	3.5437	3.3392
NM_029166	Uhrf1bp1l	254	4628	6446	4374	20.346	19.9839	21.4053	20.5784	101	4	78	10	269	4	97	68	265	252.284	222.435	263.462	3.21402	2.8486	3.68163	3.24809
NM_054093	Ube3b	481	3694	5191	3213	16.4788	17.1302	16.1861	16.5984	66	1	80	2	139	5	65	78	134	230.144	347.341	181.362	3.20964	3.62042	3.30204	3.37737
NM_001290427	Frmpd4	292	4231	8223	3939	13.4666	12.1595	12.8663	12.8308	76	5	65	3	137	4	71	62	133	205.054	225.205	146.831	3.1966	3.14965	3.18794	3.17806
NM_001024857	Ttbk2	430	4162	11078	3732	12.6209	10.0979	11.4869	11.4019	69	5	60	5	180	2	64	55	178	195.09	210.86	207.41	3.19512	3.12547	3.77368	3.36476
NM_138679	Ash1l	100	8977	11270	8877	23.1814	21.8873	22.5248	22.5312	207	8	126	15	370	2	199	111	368	255.025	178.908	180.274	3.17557	2.48009	3.06711	2.90759
NM_001042743	Mast2	266	5669	5724	5403	16.8668	18.7804	17.0355	17.5609	114	5	78	8	255	5	109	70	250	229.503	185.368	201.213	3.17201	2.68067	3.41016	3.08762
NM_015753	Zeb2	526	4174	9235	3648	52.6057	50.4637	52.812	51.9605	121	6	65	13	262	9	115	52	253	358.624	203.949	301.59	3.16927	2.16817	3.19086	2.84277
NM_007938	Epha6	283	3676	4213	3393	16.1913	17.9263	18.4777	17.5318	70	2	46	4	142	5	68	42	137	227.993	177.108	175.585	3.16348	2.6159	3.21483	2.99807
NM_018814	Pcnx	342	7377	12139	7035	28.0027	26.0402	25.9998	26.6809	175	8	147	17	443	8	167	130	435	270.053	264.394	268.891	3.15739	2.94223	3.51878	3.20613
NM_001036684	Atp2b2	439	4036	6905	3597	121.158	121.445	118.529	120.377	166	7	135	11	354	7	159	124	347	502.867	493.235	419.508	3.15612	2.9386	3.04494	3.04655
NM_181850	Grm3	364	3004	3536	2640	3.47807	2.75593	3.30921	3.18107	28	2	12	5	46	0	26	7	46	112.038	37.9373	75.7714	3.15599	1.41613	3.26606	2.61273
NM_022565	Ndst4	654	3273	3489	2619	4.75222	4.04411	5.35674	4.71769	31	1	30	2	56	0	30	28	56	130.311	152.966	92.9831	3.13902	3.1914	3.26959	3.2
NM_001033550	Lrrc8b	315	2727	2841	2412	13.6177	12.3627	15.6169	13.8658	45	2	33	1	109	2	43	32	107	202.809	189.821	192.911	3.13447	2.85655	3.52429	3.17177
NM_011857	Tenm3	49	8197	10978	8148	23.6574	20.1947	21.5399	21.7974	182	7	100	20	329	1	175	80	328	244.334	140.479	175.055	3.13352	2.15108	3.04924	2.77794
NM_181039	Adgrl1	919	5320	8188	4401	173.151	182.936	173.376	176.488	238	14	137	24	497	17	224	113	480	579.019	367.367	474.287	3.13145	2.28418	2.93872	2.78478
NM_001271809	Pcdh11x	369	4362	8637	3993	1.88512	1.93923	2.37089	2.06508	32	0	17	2	33	0	32	15	33	91.169	53.7483	35.939	3.11618	2.17773	2.50983	2.60125
NM_023045	Xpo7	99	3363	15118	3264	6.94272	6.93609	8.20227	7.36036	47	3	34	5	117	2	44	29	115	153.355	127.122	153.214	3.10877	2.65777	3.66079	3.14244
NM_175310	Pds5b	146	4487	7308	4341	26.0607	23.6968	25.5298	25.0958	107	10	74	14	216	3	97	60	213	254.202	197.758	213.374	3.10664	2.55999	3.23049	2.9657
NM_001033150	Plekhm2	195	3297	4133	3102	16.1072	16.4312	16.9086	16.4823	60	2	66	3	165	0	58	63	165	212.707	290.584	231.31	3.10016	3.36723	3.65819	3.37519
NM_001009978	Pde1a	44	1415	1612	1371	2.22393	2.89669	1.41145	2.17736	11	0	6	2	26	1	11	4	25	91.2749	41.7441	79.2965	3.0863	1.78135	3.61234	2.82666
NM_001165989	Ckap5	37	6136	6577	6099	8.82722	8.25724	8.92037	8.66828	90	4	58	11	188	5	86	47	183	160.412	110.258	130.48	3.07617	2.35439	3.30797	2.91284
NM_178078	Cnot1	303	7419	8375	7116	8.54329	7.7087	7.35458	7.86886	111	15	85	14	265	6	96	71	259	153.473	142.756	158.276	3.07005	2.78506	3.65822	3.17111
NM_028816	Xpo6	507	3882	4453	3375	16.7275	16.2535	15.0365	16.0059	64	3	41	12	133	4	61	29	129	205.614	122.941	166.214	3.06872	2.14383	3.20312	2.80522
NM_001081321	Pds5a	147	4146	4146	3999	1.34506	2.03216	1.48956	1.62226	29	1	17	8	63	1	28	9	62	79.6531	32.2006	67.4205	3.06525	1.58328	3.59616	2.74823
NM_145617	Herc1	198	14778	15229	14580	13.539	12.9845	13.0835	13.2023	267	25	285	25	752	15	242	260	737	188.823	255.146	219.817	3.06061	3.31262	3.74895	3.37406
NM_001033173	Usp31	0	4035	10198	4035	15.16	13.6966	14.4861	14.4476	73	4	63	9	168	8	69	54	160	194.537	191.48	172.436	3.04988	2.84445	3.33198	3.07544
NM_172298	Tshz3	132	3378	5002	3246	8.30186	5.60111	8.18767	7.36355	43	1	30	1	87	1	42	29	86	147.196	127.827	115.213	3.04938	2.66549	3.24922	2.98803
NM_007566	Birc6	173	14795	15768	14622	9.79216	8.98063	10.1626	9.64512	231	20	194	25	700	12	211	169	688	164.162	165.368	204.613	3.04585	2.87518	3.87798	3.26633
NM_181074	Lingo1	466	2311	3295	1845	147.394	136.723	132.037	138.718	86	6	48	9	160	3	80	39	157	493.276	302.441	370.045	3.04379	2.14797	2.75895	2.65024
NM_001190376	Camta2	284	3896	4632	3612	90.381	87.6379	78.4525	85.4905	135	7	125	12	332	7	128	113	325	403.142	447.614	391.28	3.04125	3.00373	3.19782	3.08093
NM_001083906	Nr3c2	35	2978	4087	2943	45.8928	39.2678	52.2112	45.7906	87	7	61	6	180	4	80	55	176	309.24	267.39	260.06	3.03088	2.63469	3.0707	2.91209
NM_172994	Ppp2r2c	251	1595	4031	1344	126.424	116.922	126.878	123.408	60	5	45	4	125	2	55	41	123	465.543	436.473	397.976	3.03003	2.74731	2.95052	2.90929
NM_001199137	Macf1	171	16158	17414	15987	17.2957	18.0939	19.3746	18.2547	326	30	287	44	835	30	296	243	805	210.63	217.476	218.968	3.02512	2.88791	3.50346	3.13883
NM_026164	Pnpla8	237	2568	4406	2331	20.3979	17.6479	17.2257	18.4238	45	2	18	2	65	4	43	16	61	209.857	98.2088	113.799	3.01431	1.73544	2.55241	2.43405
NM_010881	Ncoa1	712	4930	7329	4218	38.5816	39.7231	42.1542	40.153	114	7	104	8	254	5	107	96	249	288.585	325.64	256.711	3.00947	2.99778	3.14927	3.05217
NM_001040106	Aak1	536	3416	19345	2880	51.3999	46.2554	53.246	50.3005	86	6	66	10	177	4	80	56	173	316.005	278.207	261.219	3.0061	2.63559	3.00757	2.88309
NM_178407	Arap2	426	5538	7363	5112	7.61442	7.9686	8.80687	8.12996	71	5	74	6	179	3	66	68	176	146.876	190.323	149.718	2.9872	3.18039	3.55386	3.24048
NM_008306	Ndst1	154	2803	6085	2649	16.938	14.0463	16.5056	15.83	49	4	38	4	123	1	45	34	122	193.253	183.641	200.276	2.98586	2.72937	3.48025	3.06516
NM_138597	Atp5o	75	717	772	642	5.93367	4.20767	1.05258	3.73131	6	0	1	0	0	0	6	1	0	106.319	22.2863	1	2.98529	0.553031	-3.09564	0.14756
NM_001303033	Ubr3	49	5731	8081	5682	29.3042	27.7234	33.2237	30.0838	140	15	101	21	338	4	125	80	334	250.268	201.447	255.621	2.97606	2.47798	3.35689	2.93698
NM_172381	AI314180	228	5751	5902	5523	4.46282	4.6438	5.72754	4.94472	63	6	45	12	154	5	57	33	149	117.408	85.4892	117.317	2.96056	2.32383	3.57017	2.95152
NM_001276467	Asap1	230	3503	6110	3273	16.4613	15.1351	17.4222	16.3395	59	4	29	3	136	1	55	26	135	191.167	113.658	179.366	2.95131	2.01819	3.29771	2.75574
NM_001081045	Kansl1	650	3761	5510	3111	26.8927	23.9497	23.2717	24.7047	66	4	45	5	125	5	62	40	120	226.719	183.964	167.738	2.95093	2.46509	2.89494	2.77032
NM_010498	Ids	182	1841	4973	1659	87.0071	66.5235	80.1646	77.8984	59	6	61	7	155	6	53	54	149	363.434	465.715	390.563	2.94709	3.11668	3.26403	3.10927
NM_001033634	Zyg11b	170	2405	10654	2235	41.7716	40.4935	42.8034	41.6895	59	4	49	12	150	1	55	37	149	279.951	236.863	289.908	2.94326	2.51604	3.29692	2.91874
NM_011029	Rpsa	98	986	1861	888	30.7416	31.0912	27.3339	29.7222	19	0	12	2	35	0	19	10	35	243.409	161.124	171.398	2.94318	2.16299	2.78919	2.63179
NM_001165988	Ubap2l	101	3053	3627	2952	6.89143	6.82891	4.92889	6.21641	36	3	32	2	86	1	33	30	85	127.173	145.404	125.214	2.93938	2.95289	3.4947	3.12899
NM_010414	Htt	167	9530	13219	9363	18.3285	17.8846	18.2817	18.1649	171	8	152	12	487	11	163	140	476	198.047	213.937	221.077	2.93919	2.86719	3.52094	3.10911
NM_001012625	Rims1	0	3648	3648	3648	2.4841	2.7548	1.64835	2.29575	34	7	27	3	86	1	27	24	85	84.1987	94.1302	101.325	2.93831	2.92269	3.9268	3.2626
NM_001177667	Sptan1	229	7663	8018	7434	71.6999	66.2639	65.348	67.7706	240	18	238	43	656	10	222	195	646	339.724	375.305	377.887	2.93279	2.88879	3.31954	3.04704
NM_001282994	Cobl	90	4083	5449	3993	4.7516	2.73848	4.68259	4.05756	39	2	25	4	58	3	37	21	55	105.414	75.2476	59.8983	2.92299	2.25827	2.74674	2.64267
NM_001113351	Synj2	337	3853	3992	3516	1.72124	2.28855	1.38418	1.79799	24	1	17	3	71	1	23	14	70	74.4175	56.9707	86.5766	2.90585	2.34476	3.8808	3.0438
NM_183300	Zfyve9	49	2170	2170	2121	1.81268	2.10505	3.74467	2.55413	19	3	24	2	69	1	16	22	68	85.8175	148.407	139.418	2.9022	3.51559	4.30827	3.57535
NM_001081371	Dmxl1	93	9135	12211	9042	10.6343	10.358	13.256	11.4161	140	14	113	13	337	9	126	100	328	158.527	158.237	157.747	2.89496	2.71053	3.37789	2.99446
NM_001277986	Snap91	219	2910	4330	2691	71.5936	66.2511	70.5624	69.4691	83	4	61	9	185	5	79	52	180	333.972	276.479	290.878	2.8934	2.43305	2.92368	2.75004
NM_001271798	Pcdh9	705	4317	6129	3612	27.1094	25.7046	29.3536	27.3892	80	8	54	9	178	5	72	45	173	226.768	178.253	208.281	2.88974	2.35776	3.13089	2.7928
NM_181071	Tanc2	287	6272	11860	5985	39.2705	44.4727	43.6992	42.4808	149	6	106	14	331	2	143	92	329	271.812	219.936	239.047	2.88948	2.3978	3.0047	2.764
NM_011630	Nr2c2	404	2195	7620	1791	6.43627	5.91476	6.01448	6.12184	20	1	12	0	47	2	19	12	45	120.685	95.8646	109.262	2.87298	2.36107	3.30944	2.84783
NM_177805	Fam179b	235	5566	6434	5331	10.3777	9.40317	14.4989	11.4266	77	4	58	5	139	3	73	53	136	155.78	142.246	110.938	2.86919	2.55628	2.86935	2.76494
NM_010434	Hipk3	544	4123	7497	3579	17.8457	16.6408	17.5374	17.3413	61	3	59	5	133	3	58	54	130	184.358	215.876	157.955	2.86352	2.90802	3.07026	2.94727
NM_029498	Zmym2	73	4204	6876	4131	18.8853	17.2579	20.2794	18.8075	78	9	49	6	150	4	69	43	146	190.016	148.931	153.691	2.85874	2.32381	2.97069	2.71775
NM_175229	Srrm2	258	8082	8598	7824	178.126	161.167	165.94	168.411	350	28	212	25	713	23	322	187	690	468.191	341.968	383.506	2.85286	2.2089	2.66689	2.57622
NM_001291150	Ptprt	248	4586	12114	4338	4.64044	3.1591	4.31988	4.03981	44	6	25	0	124	0	38	25	124	99.653	82.4561	124.304	2.84452	2.39288	3.80327	3.01356
NM_008448	Kif5b	417	3309	6030	2892	35.3989	25.3186	29.9973	30.2382	65	7	75	12	158	8	58	63	150	228.153	311.684	225.551	2.83954	3.10459	3.17254	3.03889
NM_001252453	Ptprs	236	4742	5641	4506	97.0405	102.626	91.3862	97.0175	164	18	125	13	441	9	146	112	432	368.602	355.631	416.912	2.83662	2.59604	3.19571	2.87612
NM_054040	Tulp4	757	5401	9696	4644	24.0226	21.4515	23.6504	23.0415	88	5	65	9	199	6	83	56	193	203.321	172.531	180.724	2.83533	2.41431	3.05412	2.76792
NM_016698	Rnf10	482	2897	3112	2415	20.9917	17.3533	15.7714	18.0388	41	2	56	4	96	2	39	52	94	183.715	308.077	169.263	2.83496	3.39747	3.14082	3.12442
NM_197987	Trim37	399	3285	5637	2886	60.7618	53.5913	57.402	57.2517	82	7	80	12	210	0	75	68	210	295.639	337.12	316.428	2.83282	2.8351	3.18835	2.95209
NM_016716	Cul3	379	2686	4919	2307	6.89324	6.45917	7.40073	6.91771	27	2	24	2	79	2	25	22	77	123.279	136.442	145.143	2.8308	2.79702	3.62863	3.08548
NM_025451	Camk2n1	38	275	3613	237	287.874	288.909	290.986	289.257	13	1	10	1	32	3	12	9	29	576.009	543.334	532.11	2.8294	2.55262	2.73889	2.70697
NM_001276465	Vps13d	161	13331	15846	13170	8.38653	8.58409	8.45106	8.47389	165	10	120	17	439	12	155	103	427	133.888	111.898	140.992	2.82894	2.38929	3.43654	2.88492
NM_001114140	Tcf20	185	6149	7354	5964	31.3616	30.6711	29.7237	30.5855	127	8	89	10	301	4	119	79	297	226.989	189.523	216.556	2.82535	2.38004	3.10538	2.77026
NM_001099624	Rapgef2	51	4536	6561	4485	35.7668	35.6623	35.3474	35.5922	100	5	87	10	222	3	95	77	219	240.967	245.641	212.341	2.82119	2.66333	2.96477	2.81643
NM_015744	Enpp2	185	2774	3239	2589	4.55024	3.88615	3.31159	3.91599	23	1	16	9	43	3	22	7	40	96.6689	38.6846	67.1861	2.81921	1.31968	2.93868	2.35919
NM_133975	Trip12	125	6203	9632	6078	21.4477	21.5098	22.5421	21.8332	120	15	101	16	319	4	105	85	315	196.528	200.092	225.373	2.81842	2.66041	3.41253	2.96379
NM_008032	Aff2	461	4280	4486	3819	1.5317	1.38032	1.23175	1.38126	22	1	15	1	27	3	21	14	24	62.5556	52.4507	27.3283	2.81253	2.38357	2.41244	2.53618
NM_010956	Ogdh	123	3195	6615	3072	28.4672	29.5246	27.5901	28.5273	66	7	70	10	214	5	59	60	209	218.488	279.449	295.853	2.81181	2.98201	3.6071	3.13364
NM_008719	Npas2	496	2947	4180	2451	6.52766	5.7069	6.4541	6.22955	26	1	18	1	50	1	25	17	49	116.036	99.238	86.9369	2.80591	2.40051	2.96678	2.7244
NM_011240	Ranbp2	128	9290	9477	9162	17.7109	17.2665	19.2238	18.067	156	11	134	16	378	3	145	118	375	180.042	184.274	177.989	2.8049	2.6551	3.21218	2.89073
NM_009428	Trpc5	403	3331	8502	2928	2.36599	2.69834	2.29384	2.45272	21	1	13	2	41	1	20	11	40	77.7061	53.7519	59.4074	2.78311	2.0747	3.10756	2.65512
NM_054050	Rapgef1	283	3544	5837	3261	23.7227	22.5906	19.9633	22.0922	57	2	33	3	131	1	55	30	130	191.87	131.626	173.358	2.77679	2.04912	3.02523	2.61705
NM_001164268	Kalrn	47	5012	6430	4965	90.8323	100.515	92.431	94.5929	162	10	171	16	448	7	152	155	441	348.274	446.668	386.252	2.76986	2.94003	3.10425	2.93805
NM_001081376	Chd5	301	6160	9486	5859	33.1522	33.4193	32.7231	33.0982	126	10	75	18	225	2	116	57	223	225.232	139.195	165.513	2.76707	1.88744	2.65913	2.43788
NM_172430	Sphkap	189	5166	6512	4977	91.6077	84.4722	90.0692	88.7163	157	9	96	9	311	9	148	87	302	338.291	250.106	263.87	2.76614	2.14182	2.60203	2.50333
NM_001007221	Adam22	206	2672	2748	2466	1.15962	1.44064	1.47852	1.3596	14	1	9	2	18	1	13	7	17	59.9717	40.6142	29.9783	2.7611	2.02406	2.55767	2.44761
NM_001006664	Epb41l1	487	3127	6523	2640	67.63	65.4532	64.3049	65.7961	74	5	62	11	209	5	69	51	204	297.332	276.4	336.03	2.75813	2.46521	3.17207	2.79847
NM_001080931	Med13	0	6516	11787	6516	16.0691	11.6521	15.801	14.5074	99	8	90	5	214	8	91	85	206	158.875	186.642	137.479	2.75527	2.80506	3.00207	2.85414
NM_007988	Fasn	527	8042	9938	7515	18.5628	17.7627	14.6689	16.9981	115	3	69	5	321	9	112	64	312	169.545	121.849	180.542	2.75459	2.0949	3.27788	2.70912
NM_133189	Cacng7	0	828	828	828	11.185	8.09138	11.5804	10.2856	10	0	6	1	14	0	10	5	14	137.393	86.3997	73.5274	2.75071	1.90005	2.35384	2.33487
NM_172809	Sacs	775	3082	3343	2307	3.47035	3.27942	3.9864	3.57872	18	0	18	6	34	1	18	12	33	88.7608	74.4228	62.2039	2.74978	2.31765	2.8942	2.65388
NM_173018	Myo9a	243	8139	11974	7896	17.1987	17.2857	17.3458	17.2767	133	15	121	9	323	4	118	112	319	170.009	202.947	175.685	2.74884	2.82116	3.2265	2.93217
NM_001033285	Cdc42bpa	21	5220	8656	5199	47.9678	46.9554	52.0638	48.9957	129	10	103	10	316	12	119	93	304	260.389	255.939	254.276	2.74249	2.53098	2.98816	2.75388
NM_001128084	Arhgap21	311	6179	6972	5868	70.6376	69.3477	72.0052	70.6635	168	12	138	19	307	4	156	119	303	302.434	290.155	224.545	2.74013	2.49249	2.53765	2.59009
NM_008224	Hcfc1	354	6492	8138	6138	22.228	21.4047	20.9289	21.5205	106	7	67	9	230	3	99	58	227	183.487	135.199	160.824	2.72796	2.10347	2.93637	2.58927
NM_020027	Prrc2a	206	6683	6868	6477	48.8416	47.7694	43.3036	46.6382	153	10	138	21	417	7	143	117	410	251.165	258.455	275.272	2.71985	2.57466	3.13913	2.81121
NM_001112721	Ubr5	429	8808	9773	8379	6.95437	5.93085	7.2504	6.71188	89	6	81	10	267	6	83	71	261	112.689	121.238	135.456	2.71923	2.64469	3.55135	2.97176
NM_010687	Large	1157	3428	4654	2271	43.6396	48.0722	42.3583	44.69	51	2	49	6	128	4	49	43	124	245.457	270.909	237.441	2.71212	2.66814	2.95744	2.77923
NM_176942	Gabra5	344	1736	2674	1392	109.191	130.323	118.394	119.303	48	3	34	2	81	2	45	32	79	367.764	328.915	246.797	2.71007	2.35941	2.28621	2.4519
NM_027727	Dym	264	2274	2471	2010	6.30703	5.99776	6.11665	6.14048	20	1	17	2	34	0	19	15	34	107.536	106.775	73.5587	2.70474	2.51475	2.73637	2.65195
NM_080448	Srgap3	770	4070	8887	3300	74.1519	76.5295	76.2213	75.6342	91	3	62	6	186	3	88	56	183	303.365	242.799	241.151	2.70404	2.19467	2.59025	2.49632
NM_145128	Mgat5	634	2857	3104	2223	2.2297	1.37353	2.25139	1.95154	13	0	5	0	13	0	13	5	13	66.5273	32.1813	25.4305	2.6953	1.47164	2.05271	2.07322
NM_144788	Hectd1	356	8189	8988	7833	13.9712	12.0506	14.7366	13.5862	116	14	96	14	282	6	102	82	276	148.139	149.782	153.226	2.69344	2.52697	3.20709	2.80917
NM_009092	Rps17	30	438	474	408	7.45819	5.56806	7.54307	6.85644	4	0	3	0	4	0	4	3	4	111.531	105.204	42.6335	2.69162	2.42726	1.86781	2.3289
NM_001162917	Dennd4a	473	6083	8655	5610	10.0445	8.25685	9.61405	9.30515	66	4	50	4	133	7	62	46	126	125.726	117.319	97.6695	2.68241	2.40144	2.83763	2.64049
NM_001271679	Wnk3	62	5195	10259	5133	3.68375	2.78042	3.53267	3.33228	42	5	33	3	123	2	37	30	121	82.0024	83.6224	102.51	2.67805	2.52857	3.66771	2.95811
NM_007459	Ap2a2	180	2997	4639	2817	50.6929	48.9498	44.6673	48.1033	65	4	56	5	166	5	61	51	161	246.342	259.033	248.537	2.67344	2.55935	2.96883	2.73387
NM_029525	Prex2	328	5125	11054	4797	1.34681	0.899944	1.14678	1.13118	24	2	34	7	103	9	22	27	94	52.1734	80.5316	85.2137	2.66978	3.1219	4.20101	3.3309
NM_001114613	Stxbp5l	157	3544	11893	3387	27.4976	27.4921	30.7874	28.5924	62	3	53	5	125	4	59	48	121	198.168	202.768	155.354	2.66962	2.51788	2.67608	2.6212
NM_207225	Hdac4	301	3532	8100	3231	1.22327	1.19055	1.12359	1.17913	15	0	7	0	31	1	15	7	30	52.8142	30.998	40.3772	2.66264	1.71963	3.09272	2.49166
NM_009572	Zhx1	697	3319	5105	2622	23.1156	22.4495	21.3933	22.3195	45	4	32	5	93	1	41	27	92	177.888	147.334	152.583	2.66153	2.20563	2.8335	2.56688
NM_011743	Zfp106	176	5843	9099	5667	30.5457	25.6257	27.2204	27.7973	107	10	84	11	209	1	97	73	208	194.722	184.307	159.611	2.66113	2.39708	2.73596	2.59806
NM_178725	Lrrc4c	858	2781	3492	1923	54.4539	52.7608	61.2005	56.1384	46	2	25	0	61	0	44	25	61	260.297	186.009	137.944	2.66085	1.98898	2.00509	2.21831
NM_001081412	Bcr	130	3943	6537	3813	32.5848	31.3211	29.8088	31.2382	70	2	45	5	149	6	68	40	143	202.88	150.095	163.088	2.65076	2.03088	2.68065	2.4541
NM_177821	Ep300	415	7654	8749	7239	15.5765	14.0506	16.1609	15.2626	103	7	55	10	185	3	96	45	182	150.865	88.9419	109.331	2.65038	1.7053	2.63399	2.32989
NM_001004144	Git1	171	2484	3650	2313	76.9105	78.7885	76.6287	77.4426	64	4	69	6	182	3	60	63	179	295.102	389.706	336.534	2.65011	2.86314	3.05357	2.85561
NM_001159591	Csnk1g2	316	1564	2259	1248	41.7682	45.3403	37.698	41.6022	27	2	35	5	61	2	25	30	59	227.888	343.937	205.584	2.64766	3.05539	2.8026	2.83522
NM_001160256	Smg7	109	3526	5803	3417	30.7259	27.6559	29.4903	29.2907	64	5	35	4	128	2	59	31	126	196.428	129.804	160.353	2.64252	1.85993	2.70391	2.40212
NM_201245	Mprip	331	3445	8718	3114	56.8276	58.2769	57.4352	57.5132	80	9	70	13	194	2	71	57	192	259.38	261.896	268.123	2.64133	2.4681	2.94599	2.68514
NM_001286260	Nfat5	356	4034	4717	3678	15.2952	15.0856	16.8479	15.7429	51	2	29	5	78	1	49	24	77	151.559	93.3624	91.0396	2.63853	1.7567	2.34691	2.24738
NM_178065	Arel1	632	3104	5434	2472	47.3539	50.4561	44.9514	47.5871	54	2	55	4	153	4	52	51	149	239.305	295.185	262.113	2.63806	2.75429	3.05355	2.8153
NM_001164585	Dnajc6	289	2992	5218	2703	40.1536	35.2503	40.0535	38.4858	60	8	64	11	189	4	52	53	185	218.854	280.545	297.63	2.63572	2.80816	3.39405	2.94597
NM_009628	Adnp	544	3871	4953	3327	61.6937	55.5815	58.0776	58.4509	77	1	42	9	148	6	76	33	142	259.871	141.917	185.604	2.63442	1.57445	2.40335	2.20407
NM_010193	Fem1b	343	2227	6496	1884	36.0481	32.2844	31.6231	33.3185	35	1	24	1	67	1	34	23	66	205.303	174.67	152.34	2.62946	2.21099	2.53456	2.45834
NM_028759	Dcaf6	236	2867	3306	2631	13.7205	12.9267	11.8473	12.8315	36	4	29	4	48	1	32	25	47	138.365	135.954	77.6834	2.62904	2.42149	2.26942	2.43998
NM_001080814	Fat3	6	13662	18468	13656	14.478	15.7256	15.9984	15.4007	187	8	113	7	301	9	179	106	292	149.117	111.059	92.9846	2.6282	2.0203	2.39368	2.34739
NM_011643	Trpc1	471	2901	4574	2430	3.69026	3.32893	3.12673	3.38197	18	1	6	0	14	0	17	6	14	79.5864	35.3279	25.0538	2.62609	1.27661	1.62409	1.84226
NM_028601	Zmiz2	225	2988	4053	2763	45.8109	43.4292	44.2686	44.5029	59	3	34	10	151	5	56	24	146	230.57	124.28	229.786	2.62436	1.54644	2.91326	2.36136
NM_145390	Tnpo2	119	2813	4866	2694	29.6435	31.5628	32.2299	31.1454	50	3	37	5	105	1	47	32	104	198.471	169.951	167.875	2.62084	2.21191	2.7246	2.51911
NM_001003672	Pcdhac2	0	3021	5422	3021	6.45578	5.61656	4.97568	5.68268	28	2	25	3	64	1	26	22	63	97.9082	104.194	90.6862	2.61561	2.52591	3.09572	2.74575
NM_152923	Kcnq3	0	2622	2878	2622	11.9201	11.4631	10.9551	11.4461	32	2	26	3	76	1	30	23	75	130.162	125.507	124.388	2.60898	2.37463	3.03319	2.67227
NM_023868	Ryr2	499	15400	16813	14901	32.1705	31.4679	35.5042	33.0475	287	24	273	32	734	15	263	241	719	200.787	231.406	209.829	2.60224	2.62167	3.00253	2.74215
NM_001098172	Pcdh10	855	3999	4234	3144	12.0656	12.2272	10.9395	11.7441	38	2	28	3	73	2	36	25	71	130.262	113.771	98.2036	2.59476	2.21758	2.67315	2.49516
NM_033524	Spred1	654	1989	6319	1335	26.3967	21.8635	27.7766	25.3456	24	3	13	7	58	3	21	6	55	178.951	64.3047	179.157	2.59432	0.93331	2.97099	2.16621
NM_001168292	R3hdm2	220	3355	4030	3135	28.6516	30.856	31.2939	30.2672	60	7	40	3	87	1	53	37	86	192.325	168.864	119.292	2.59251	2.21979	2.25288	2.35506
NM_011952	Mapk3	20	1163	1772	1143	43.6376	39.928	41.2717	41.6125	24	2	21	1	40	1	22	20	39	218.964	250.355	148.378	2.58988	2.59708	2.33197	2.50631
NM_001122758	Pcdh7	1024	4792	8676	3768	5.91687	3.83763	5.0951	4.94987	31	1	19	2	47	1	30	17	46	90.5746	64.5521	53.0883	2.5856	1.91793	2.42545	2.30966
NM_018733	Scn1a	187	6184	8287	5997	15.826	14.6012	15.3164	15.2479	83	7	64	12	158	3	76	52	155	144.17	124.063	112.396	2.58547	2.18601	2.67459	2.48202
NM_175535	Arhgap20	156	3705	6365	3549	25.056	22.2636	24.2821	23.8672	59	5	38	6	152	0	54	32	152	173.095	129.008	186.247	2.58215	1.9738	3.07148	2.54248
NM_011273	Xpr1	210	2298	7651	2088	27.9315	25.7391	25.0013	26.2239	35	2	27	6	65	1	33	21	64	179.796	143.9	133.291	2.58081	2.07496	2.51912	2.39163
NM_001286713	Tsc2	119	5546	6335	5427	9.90324	9.8065	8.36324	9.35766	59	3	51	3	149	4	56	48	145	117.388	126.548	116.188	2.58006	2.50731	3.08394	2.72377
NM_001163024	Mon2	543	5691	9300	5148	12.7691	13.1308	12.2326	12.7108	63	3	41	4	156	0	60	37	156	132.589	102.834	131.776	2.57316	2.02435	3.03883	2.54545
NM_001163126	Cog5	21	2511	2997	2490	2.12655	1.82901	2.6029	2.18616	14	0	4	0	25	0	14	4	25	63.9624	22.9844	43.6608	2.5709	0.918015	2.74844	2.07912
NM_001177396	Anks1b	301	1834	4905	1533	79.4326	72.1021	71.9655	74.5001	39	2	29	3	61	0	37	26	61	274.572	242.663	173.037	2.56917	2.20292	2.12258	2.29823
NM_001077354	C77370	588	5136	10891	4548	12.9701	10.6534	13.0869	12.2368	55	3	41	8	106	0	52	33	106	130.071	103.816	101.353	2.56814	2.06086	2.68827	2.43909
NM_133780	Tpr	106	7402	7550	7296	3.0864	3.17303	3.42258	3.22734	51	3	31	6	103	0	48	25	103	74.8433	49.0261	61.3909	2.56534	1.77741	2.95174	2.4315
NM_138306	Dgkz	117	2907	3494	2790	96.3762	114.322	106.656	105.785	81	4	98	9	274	4	77	89	270	313.966	456.413	420.834	2.55359	2.90413	3.14517	2.86763
NM_198033	Setx	683	8624	10970	7941	11.91	10.4379	13.5852	11.9777	102	13	77	6	219	9	89	71	210	127.5	127.925	114.999	2.55211	2.37495	2.88635	2.60447
NM_028777	Sec14l1	210	2370	2869	2160	49.1318	50.242	45.827	48.4003	44	1	22	3	75	2	43	19	73	226.47	125.856	146.967	2.54843	1.51429	2.20631	2.08968
NM_010748	Lyst	181	11545	11806	11364	8.53613	7.79854	10.4069	8.91387	122	10	103	16	290	11	112	87	279	112.12	109.537	106.764	2.54278	2.32817	2.99788	2.62294
NM_026799	Drosha	276	4398	4567	4122	7.41363	8.62402	6.76124	7.59963	45	7	57	11	99	4	38	46	95	104.875	159.67	100.223	2.54149	2.96747	3.02477	2.84458
NM_027293	Dopey2	187	7075	7316	6888	13.5299	13.4866	13.4174	13.478	89	9	64	6	217	4	80	58	213	132.127	120.478	134.474	2.53319	2.21768	3.02468	2.59185
NM_001099298	Scn2a1	51	6072	8690	6021	91.8016	95.5643	95.3793	94.2484	168	12	134	17	334	11	156	117	323	294.749	278.029	233.284	2.5313	2.25825	2.3795	2.38968
NM_146150	Nrd1	28	3514	4155	3486	10.4256	10.0166	10.1305	10.1909	44	8	38	6	103	4	36	32	99	117.482	131.339	123.498	2.53035	2.50979	3.10881	2.71632
NM_175162	Stox2	338	2744	9316	2406	19.273	17.3796	20.3061	18.9863	38	6	39	3	73	1	32	36	72	151.304	214.082	130.133	2.52443	2.84166	2.72364	2.69658
NM_008817	Peg3	362	5078	6624	4716	40.6734	32.5034	37.4892	36.8887	90	8	62	8	152	5	82	54	147	197.805	163.83	135.549	2.5151	2.05753	2.29071	2.28778
NM_177151	Vps13b	260	12242	13371	11982	7.40669	6.74152	7.74246	7.29689	114	8	83	8	272	5	106	75	267	100.641	89.558	96.9022	2.50627	2.15764	3.00625	2.55672
NM_198702	Adgrl3	513	5145	5812	4632	16.4914	16.8368	15.5752	16.3012	62	5	51	6	118	1	57	45	117	139.992	139.001	109.842	2.50322	2.30999	2.59198	2.4684
NM_001081116	Arhgef17	422	6596	10250	6174	25.9692	24.6892	23.4661	24.7082	94	4	88	15	279	1	90	73	278	165.833	169.172	195.808	2.49968	2.34407	3.11806	2.65394
NM_021537	Stk25	237	1518	3254	1281	51.505	59.6769	54.1396	55.1072	27	1	10	3	43	2	26	7	41	230.898	78.1846	139.183	2.499	0.749678	2.03172	1.76013
NM_008226	Hcn2	35	2627	3195	2592	28.7839	23.2568	23.2969	25.1125	41	3	31	5	96	5	38	26	91	166.78	143.519	152.671	2.49821	2.0971	2.74704	2.44745
NM_011056	Pde4d	180	2424	7049	2244	6.71748	6.8979	6.3864	6.66726	20	1	13	1	29	0	19	12	29	96.3223	76.5122	56.1987	2.4968	1.9846	2.28707	2.25616
NM_015802	Dlc1	348	3627	6171	3279	4.19567	3.83274	6.08359	4.704	25	1	11	6	52	2	24	5	50	83.2657	21.8173	66.3102	2.49458	0.383479	2.784	1.88736
NM_009084	Rpl37a	61	340	588	279	3.72588	3.62536	6.08064	4.47729	2	0	1	0	4	0	2	1	4	81.5496	51.2824	62.3458	2.49399	1.64608	2.73164	2.29057
NM_177034	Apba1	287	2816	6632	2529	27.4182	23.6632	24.7258	25.2691	38	1	28	3	89	0	37	25	89	166.437	141.437	153.036	2.49153	2.07229	2.74587	2.43657
NM_001290715	Adgrb2	15	4701	4996	4686	194.66	192.17	167.886	184.906	167	11	156	15	436	5	156	141	431	378.72	430.516	399.969	2.4912	2.48509	2.65835	2.54488
NM_008739	Nsd1	111	8187	12784	8076	33.768	30.6023	35.1633	33.1779	144	12	120	15	336	6	132	105	330	185.94	186.023	177.693	2.48907	2.30437	2.75978	2.51774
NM_183208	Zmiz1	606	3825	7521	3219	24.601	21.0821	22.7755	22.8196	50	5	35	2	90	1	45	33	89	159.033	146.678	120.232	2.48667	2.1859	2.47332	2.38197
NM_153548	E430025E21Rik	232	3712	4018	3480	2.62712	3.71378	1.65836	2.66642	22	2	11	5	58	1	20	6	57	65.3803	24.6686	71.2274	2.48414	0.900987	3.3075	2.23088
NM_172424	Med13l	67	6691	9296	6624	23.1602	21.4792	23.3918	22.6771	104	12	79	11	223	1	92	68	222	158.002	146.879	145.742	2.48103	2.19164	2.75555	2.47607
NM_001081307	Ppp1r12b	158	3137	3137	2979	3.26969	2.62108	2.02048	2.63708	18	1	13	1	45	0	17	12	45	64.9194	57.6346	65.6891	2.48053	2.13188	3.19891	2.60377
NM_001081298	Adgrl2	0	4464	6052	4464	17.088	18.5006	20.0597	18.5494	60	3	45	3	101	1	57	42	100	145.26	134.616	97.4153	2.4795	2.1863	2.32311	2.32963
NM_023662	Pcm1	224	6302	8381	6078	12.8028	13.1293	13.3218	13.0847	68	1	49	12	197	6	67	37	191	125.404	87.0991	136.655	2.47549	1.76739	3.06981	2.43756
NM_011074	Cdk14	126	1536	4912	1410	43.6586	36.8263	43.5082	41.331	30	5	19	3	58	1	25	16	57	201.705	162.358	175.795	2.47548	1.97635	2.58161	2.34448
NM_172803	Dock4	305	6242	8072	5937	31.064	28.0938	32.9386	30.6988	99	6	101	13	271	4	93	88	267	178.202	212.074	195.567	2.47404	2.54001	2.95556	2.65654
NM_001081290	Prrc2c	286	8827	10444	8541	29.1148	25.2998	25.4578	26.6241	138	12	98	15	299	7	126	83	292	167.826	139.041	148.671	2.47238	2.01632	2.66545	2.38472
NM_027231	Polr2f	90	474	569	384	2.97523	3.21121	0.285622	2.15735	2	0	0	0	1	0	2	0	1	59.2509	1	11.3245	2.46842	-3.59662	0.81137	-0.105611
NM_026984	Kmt2e	469	6076	7258	5607	27.2281	22.6572	29.2211	26.3688	86	4	44	7	150	2	82	37	148	166.372	94.4156	114.784	2.46557	1.46369	2.29939	2.07622
NM_172829	St6gal2	155	1472	2278	1317	10.4916	11.8978	14.3399	12.2431	14	0	6	1	13	0	14	5	13	120.931	54.3196	42.9249	2.46273	1.12606	1.44838	1.67906
NM_001145959	Ndrg2	172	1246	2115	1074	13.0187	5.71144	15.0608	11.2637	13	2	17	2	72	3	11	15	69	116.516	199.829	279.381	2.45877	3.05527	4.21246	3.24217
NM_008614	Mobp	139	385	3286	246	17.2436	16.3108	18.0521	17.2022	3	0	4	1	11	0	3	3	11	138.734	174.485	194.45	2.45813	2.60575	3.37612	2.81333
NM_133360	Acaca	26	7064	9032	7038	5.06072	5.74309	6.13584	5.64655	58	4	59	6	130	2	54	53	128	87.2852	107.745	79.0883	2.45372	2.57808	2.90302	2.64494
NM_009295	Stxbp1	141	1926	3874	1785	149.22	142.518	136.593	142.777	54	2	42	4	110	2	52	38	108	331.407	304.592	263.11	2.45281	2.1409	2.24556	2.27976
NM_133781	Cab39	418	1444	3800	1026	57.6793	54.0675	51.279	54.3419	25	5	23	3	50	1	20	20	49	221.758	278.904	207.683	2.44906	2.59287	2.61947	2.5538
NM_001110275	Itsn1	261	3903	5364	3642	5.61591	6.43427	6.84736	6.29918	32	3	30	3	70	3	29	27	67	90.5846	106.071	79.9993	2.44205	2.48991	2.83857	2.59018
NM_001162996	Eml2	34	1984	2255	1950	3.31206	4.23146	2.73868	3.4274	13	1	7	1	31	1	12	6	30	70.0072	44.024	66.9018	2.43311	1.58609	3.03123	2.35015
NM_001204229	Clec16a	224	3329	6238	3105	18.2866	18.1768	18.3674	18.2769	41	3	19	4	57	0	38	15	57	139.225	69.1198	79.8297	2.4271	1.23349	2.04684	1.90248
NM_009826	Rb1cc1	450	5217	7046	4767	19.0869	21.5669	21.3816	20.6785	66	5	74	12	187	3	61	62	184	145.573	186.088	167.851	2.41782	2.5883	3.02762	2.67792
NM_001267872	Zdbf2	459	7941	12571	7482	4.89555	4.23127	5.09366	4.74016	54	2	43	6	125	2	52	37	123	79.0646	70.7549	71.4889	2.41533	2.07625	2.88682	2.45947
NM_027526	Rasgef1a	60	1530	3236	1470	119.554	140.313	135.6	131.823	43	3	41	4	89	1	40	37	88	309.556	360.128	260.326	2.40199	2.43039	2.28932	2.3739
NM_011297	Rps24	75	468	857	393	21.1482	23.4527	18.5844	21.0618	5	0	5	1	9	0	5	4	9	144.735	145.626	99.5867	2.39855	2.22357	2.26087	2.29433
NM_001113517	Arhgef7	147	2496	4929	2349	21.0216	17.6906	15.299	18.0038	28	0	25	0	50	2	28	25	48	135.604	152.275	88.8607	2.39805	2.38203	2.21261	2.3309
NM_177184	Vps13c	31	11278	11523	11247	5.28462	5.1887	6.14928	5.54087	95	13	102	12	289	8	82	90	281	82.9418	114.493	108.648	2.39135	2.67704	3.37513	2.81451
NM_001290814	Aff3	103	3793	7251	3690	12.6006	11.4376	11.9239	11.9873	38	1	22	6	62	2	37	16	60	114.07	62.0392	70.7093	2.39105	1.33042	2.1841	1.96852
NM_001081362	Trrap	117	11661	12476	11544	22.7206	23.7584	23.2914	23.2568	159	7	107	21	373	5	152	86	368	149.79	106.59	138.625	2.38898	1.71394	2.66464	2.25585
NM_028487	Gpbp1	1329	2811	3624	1482	23.9751	25.0974	25.8756	24.9827	22	2	18	3	39	0	20	15	39	153.525	144.816	114.437	2.38182	2.11318	2.335	2.27667
NM_001081963	9430020K01Rik	159	4122	6731	3963	17.0582	17.2526	23.9517	19.4208	48	0	27	3	103	0	48	24	103	137.789	86.6482	113.022	2.37594	1.52317	2.50351	2.13421
NM_008855	Prkcb	220	2242	8830	2022	269.053	322.797	316.81	302.887	81	5	70	4	218	4	76	66	214	427.591	467.02	460.24	2.37209	2.30666	2.49546	2.3914
NM_177819	Fam135b	189	4401	4623	4212	7.77618	5.95051	6.71449	6.81373	34	1	28	3	91	1	33	25	90	89.1296	84.9228	92.9192	2.37188	2.12204	2.99642	2.49678
NM_173440	Nrip1	723	4209	4529	3486	9.30082	8.00156	6.56678	7.95639	30	1	27	0	81	1	29	27	80	94.6383	110.818	99.7962	2.36597	2.41306	2.98465	2.58789
NM_011393	Slc1a2	38	1715	2127	1677	6.60138	4.29521	9.32172	6.73944	18	5	37	4	113	4	13	33	109	88.1874	281.549	282.647	2.36308	3.85777	4.60949	3.61011
NM_178005	Lrrtm2	428	1976	5673	1548	20.6257	20.9712	19.9961	20.531	22	3	16	1	37	0	19	15	37	139.63	138.641	103.94	2.36196	2.16796	2.34149	2.29047
NM_177700	Atmin	34	2491	4877	2457	20.5413	15.5897	15.3621	17.1644	28	0	16	3	73	1	28	13	72	129.643	75.7026	127.432	2.36166	1.40238	2.76807	2.17737
NM_009147	Sec23a	197	2495	4108	2298	29.8529	26.3165	27.5348	27.9014	34	2	21	3	63	3	32	18	60	158.415	112.071	113.541	2.36119	1.67714	2.24185	2.09339
NM_009938	Copa	381	4056	4629	3675	19.5121	15.789	17.0278	17.4429	48	6	39	7	128	1	42	32	127	130.013	124.585	150.279	2.35618	2.11145	2.99407	2.48723
NM_001285426	Cacnb4	114	1623	7792	1509	39.9123	30.849	45.844	38.8684	24	0	13	1	46	0	24	12	46	180.933	113.78	132.562	2.35531	1.50024	2.21987	2.02514
NM_001081370	Shank2	584	4373	5913	3789	53.7911	46.1456	45.7625	48.5664	72	6	67	9	192	2	66	58	190	198.16	219.016	218.062	2.35373	2.3115	2.77302	2.47942
NM_001081344	Stxbp5	357	3708	9074	3351	28.9946	29.3097	32.776	30.3601	50	2	22	4	108	0	48	18	108	162.953	76.8547	140.152	2.3516	1.0823	2.48311	1.97234
NM_010243	Fut9	510	1590	11990	1080	13.2638	11.167	15.6961	13.3756	14	3	2	0	13	0	11	2	13	115.868	26.4959	52.3445	2.34829	0.0373174	1.6691	1.35157
NM_001081055	Trappc10	140	3917	5048	3777	15.8507	17.4546	16.3549	16.5534	44	2	47	1	145	3	42	46	142	126.502	174.254	163.491	2.34789	2.62689	3.15438	2.70972
NM_001170669	Pde8b	237	2604	4619	2367	17.9697	16.3946	18.472	17.6121	27	0	15	1	46	0	27	14	46	129.766	84.6257	84.5106	2.34768	1.5477	2.15648	2.01729
NM_025919	Rpl11	18	555	594	537	0.922061	0.683569	1.9152	1.17361	2	0	2	1	1	1	2	1	0	42.3694	26.6439	1	2.34753	1.50407	-2.23927	0.537445
NM_001001152	Zfp458	32	2291	3488	2259	2.19835	2.35731	2.1899	2.24852	12	1	12	3	16	1	11	9	15	55.3953	57.0031	28.8753	2.34667	2.21154	2.13111	2.22977
NM_001081426	Dip2c	457	5128	8026	4671	14.7277	13.5583	12.9189	13.735	54	6	42	2	164	4	48	40	160	116.904	122.524	148.957	2.34531	2.23065	3.15826	2.57808
NM_001033443	Cdkl4	167	1196	2931	1029	10.5494	8.83148	8.59448	9.32513	9	0	3	1	11	0	9	2	11	99.5001	27.8091	46.4867	2.34361	0.323348	1.76495	1.4773
NM_008678	Ncoa2	222	4611	8267	4389	19.5322	14.7716	16.2185	16.8408	50	1	42	3	116	2	49	39	114	127.007	127.137	112.951	2.34337	2.16176	2.60813	2.37109
NM_001289826	Clock	345	2913	9744	2568	22.3969	21.0021	22.7166	22.0385	35	3	18	5	67	0	32	13	67	141.759	72.4304	113.457	2.34155	1.18879	2.41543	1.98192
NM_153178	Ago2	165	2748	8031	2583	13.212	10.8196	12.0204	12.0173	28	3	22	3	65	4	25	19	61	110.106	105.245	102.697	2.33853	2.09142	2.72067	2.38354
NM_011104	Prkce	808	3022	6254	2214	238.487	241.439	244.974	241.633	79	5	78	14	235	8	74	64	227	380.234	413.595	445.861	2.33743	2.26684	2.61695	2.40708
NM_016774	Atp5b	20	1610	1879	1590	149.692	148.618	135.879	144.73	48	5	48	14	170	5	43	34	165	307.658	305.953	451.272	2.33743	2.13919	3.01384	2.49682
NM_011855	Tenm1	93	8289	8363	8196	3.06619	2.39118	3.22589	2.89442	47	3	26	6	73	3	44	20	70	61.0727	34.9141	37.1405	2.3369	1.35293	2.30731	1.99905
NM_011858	Tenm4	279	8670	13172	8391	11.4007	10.4885	11.1167	11.002	84	6	62	14	211	2	78	48	209	105.749	81.8465	108.314	2.33291	1.78158	2.86285	2.32578
NM_001172152	Wdr17	87	3960	4138	3873	1.75677	2.08515	3.2598	2.36724	19	0	16	0	39	1	19	16	38	55.8088	59.1078	42.6666	2.32672	2.233	2.65629	2.40534
NM_001034964	Sorbs1	43	2266	5275	2223	50.688	57.6346	57.2128	55.1785	40	0	11	5	68	1	40	6	67	204.7	38.6175	131.065	2.32448	-0.268726	1.94406	1.33327
NM_172646	Dnm3	211	2791	4590	2580	3.70994	3.09617	2.33687	3.04766	15	1	3	1	18	1	14	2	17	61.7312	11.0913	28.6537	2.32161	-0.332371	1.89485	1.2947
NM_001002005	Panx2	348	2382	3412	2034	54.4464	49.8625	45.2023	49.8371	36	1	23	0	64	2	35	23	62	195.755	161.789	132.554	2.32072	1.8591	2.03574	2.07185
NM_001163026	Dnajc13	245	6977	7697	6732	5.03929	5.26212	5.82762	5.37634	53	7	48	6	122	2	46	42	120	77.7338	89.2643	77.5155	2.31576	2.336	2.91035	2.5207
NM_001081179	Heatr5b	98	6311	6437	6213	3.94494	2.98049	3.96387	3.62977	36	0	26	6	107	7	36	20	100	65.917	46.0576	69.9923	2.31206	1.61685	3.05391	2.32761
NM_172655	Hecw2	94	979	1132	885	0.747749	0.986405	1.29211	1.00875	3	0	3	0	8	0	3	3	8	38.5633	48.501	39.3096	2.30198	2.45902	3.16961	2.64354
NM_001099288	Arhgap44	323	2750	4022	2427	35.0718	31.9522	33.7402	33.5881	37	2	23	2	74	0	35	21	74	164.057	123.8	132.591	2.3011	1.70954	2.32828	2.11297
NM_001013741	Ddn	112	2245	3740	2133	610.196	556.297	497.551	554.681	100	2	137	14	365	4	98	123	361	522.675	825.062	735.983	2.30108	2.76498	2.7248	2.59695
NM_007458	Ap2a1	144	3078	3443	2934	24.4256	18.6333	16.3793	19.8127	38	4	32	3	80	0	34	29	80	131.83	141.42	118.572	2.30026	2.21794	2.55787	2.35869
NM_011086	Pikfyve	158	6317	11255	6159	6.84824	6.86354	6.91662	6.87613	47	1	39	3	107	2	46	36	105	84.9658	83.6305	74.1362	2.29742	2.09445	2.66387	2.35191
NM_001289474	Erbb2ip	398	4283	6196	3885	6.51722	4.71835	6.42626	5.88728	31	4	43	7	135	4	27	36	131	79.0622	132.582	146.633	2.28608	2.85231	3.76279	2.96706
NM_007379	Abca2	96	7398	8061	7302	20.1549	20.0602	17.9434	19.3862	86	3	64	8	204	3	83	56	201	129.31	109.728	119.703	2.28539	1.86493	2.58768	2.246
NM_027707	Nipbl	418	8815	10216	8397	7.92488	8.08821	8.78136	8.26482	71	4	71	7	183	4	67	64	179	90.771	109.051	92.7001	2.2831	2.36708	2.85007	2.50008
NM_001252253	Nf2	138	1779	1846	1641	1.94202	2.69447	2.90527	2.51392	8	0	4	1	20	1	8	3	19	55.4597	26.1568	50.3497	2.28183	1.0208	2.85065	2.0511
NM_008171	Grin2b	763	5212	7515	4449	111.681	141.763	131.702	128.382	118	8	114	15	341	9	110	99	332	281.272	318.38	324.509	2.27953	2.26848	2.62684	2.39162
NM_020283	B3galt1	282	1263	5222	981	19.4417	17.184	20.2604	18.962	11	0	7	0	12	0	11	7	12	127.562	102.094	53.1941	2.27893	1.77416	1.43394	1.82901
NM_001014981	Wdr7	238	4708	7109	4470	35.258	35.3979	36.669	35.775	76	11	56	4	187	2	65	52	185	165.425	166.444	179.976	2.27548	2.09875	2.72241	2.36555
NM_134112	Kctd1	122	920	1772	798	24.418	27.1534	23.479	25.0168	10	0	6	0	14	0	10	6	14	142.559	107.577	76.2916	2.2741	1.68352	1.74903	1.90221
NM_028296	Car10	936	1923	3336	987	12.821	11.2586	10.8638	11.6478	9	0	2	0	6	0	9	2	6	103.734	28.9925	26.4354	2.27115	0.250144	0.785943	1.10241
NM_175353	Exoc6	47	2462	2737	2415	4.63894	4.48766	4.6909	4.60583	16	1	6	1	33	2	15	5	31	70.6595	29.6228	55.8208	2.27032	0.837354	2.55119	1.88629
NM_013603	Mt3	193	400	538	207	33.5952	40.5663	33.2288	35.7968	3	0	1	1	4	0	3	0	4	164.872	1	84.0313	2.27028	-5.28051	1.62315	-0.462359
NM_001008506	Zc3h14	155	1970	3163	1815	7.41438	5.64836	6.52542	6.52939	15	2	9	1	39	1	13	8	38	81.4823	63.0646	91.0455	2.26787	1.71827	2.99859	2.32824
NM_019827	Gsk3b	1525	2788	8298	1263	37.2264	31.3901	35.1556	34.5907	18	0	10	1	34	1	18	9	33	162.131	101.956	113.622	2.26652	1.41183	2.08377	1.92071
NM_001033258	Arfgef3	133	6646	8216	6513	18.5142	18.0015	23.6776	20.0644	81	7	70	7	262	7	74	63	255	129.255	138.399	170.259	2.26427	2.17921	3.07049	2.50466
NM_153780	2610044O15Rik8	139	406	1776	267	7.51355	8.05907	6.49709	7.35657	2	0	0	0	1	0	2	0	1	85.2148	1	16.287	2.26138	-4.33199	0.42741	-0.547735
NM_008413	Jak2	424	3823	5055	3399	5.53565	6.32555	7.33023	6.39714	25	1	20	3	37	1	24	17	36	80.326	71.56	46.0578	2.25945	1.91286	2.0306	2.06764
NM_001114664	Iqsec2	205	4645	5995	4440	72.515	72.7757	63.3268	69.5392	94	10	87	9	299	9	84	78	290	215.225	251.353	284.031	2.25892	2.29499	2.88857	2.48083
NM_001242558	Ncoa6	141	3375	3896	3234	15.3872	15.0858	16.4354	15.6362	34	1	28	3	82	0	33	25	82	116.083	110.604	110.262	2.25787	2.00528	2.62832	2.29716
NM_008881	Plxna1	280	5965	9028	5685	29.9476	27.6375	25.1123	27.5658	75	2	50	4	159	3	73	46	156	146.079	115.771	119.329	2.25145	1.73125	2.32254	2.10175
NM_001080819	Arid1a	0	6852	8175	6852	33.4804	34.6562	36.6189	34.9185	100	3	84	10	246	2	97	74	244	161.046	154.521	154.855	2.25122	2.00604	2.52346	2.26024
NM_026856	Zfp644	316	4195	5690	3879	18.1751	16.6805	16.8231	17.2262	43	2	42	4	92	2	41	38	90	120.243	140.164	100.896	2.25093	2.28893	2.42855	2.3228
NM_001205239	Parp6	557	2450	2714	1893	14.2182	17.0181	14.7908	15.3424	22	3	18	1	42	0	19	17	42	114.182	128.49	96.4829	2.24536	2.2329	2.44977	2.30934
NM_008168	Grik5	380	3320	3840	2940	84.9953	86.0721	76.6462	82.5712	62	3	60	7	188	3	59	53	185	228.297	257.93	273.638	2.24158	2.22928	2.70761	2.39283
NM_145400	Ube4a	252	3339	6061	3087	13.9902	12.6448	16.276	14.3037	33	3	24	5	73	5	30	19	68	110.556	88.0622	95.7908	2.24058	1.72986	2.49129	2.15391
NM_173066	Ep400	261	9261	10690	9000	13.7357	13.1517	13.5306	13.4726	90	5	81	8	188	4	85	73	184	107.442	116.052	88.9051	2.23504	2.16392	2.42798	2.27565
NM_183019	Arhgef4	334	1789	2714	1455	79.8055	77.7969	69.4627	75.6884	29	1	27	3	45	1	28	24	44	218.923	236.005	131.505	2.23298	2.1533	1.7149	2.03373
NM_001012765	Adcy5	463	4252	5060	3789	8.57079	8.32543	7.61205	8.16942	34	5	34	3	73	0	29	31	73	87.0702	117.06	83.7818	2.22997	2.47629	2.71273	2.473
NM_001081336	Dgkh	0	3471	3967	3471	5.09585	6.19245	6.06322	5.78384	25	2	27	2	46	2	23	25	44	75.3823	103.052	55.1251	2.22789	2.49943	2.36448	2.36393
NM_010412	Hdac5	368	3713	3795	3345	5.45802	5.91139	3.89703	5.08881	21	0	32	2	84	2	21	30	82	71.4199	128.321	106.603	2.22631	2.89255	3.41073	2.8432
NM_001163632	Satb1	162	2457	6168	2295	12.577	10.0885	15.3349	12.6668	23	2	15	2	43	0	21	13	43	104.096	81.0463	81.4774	2.22617	1.68294	2.34778	2.08563
NM_008839	Pik3ca	55	3262	8917	3207	11.1286	12.4995	13.4324	12.3535	30	1	37	1	75	2	29	36	73	102.872	160.611	98.9864	2.22403	2.6847	2.64715	2.51863
NM_133907	Ube3c	273	3525	5033	3252	20.3993	17.6276	18.7286	18.9185	37	2	36	3	149	2	35	33	147	122.437	145.19	196.57	2.22115	2.28358	3.32135	2.60869
NM_019987	Ick	394	2284	6640	1890	4.25175	3.91364	4.67486	4.28009	12	1	4	2	16	0	11	2	16	66.2105	15.1405	36.8137	2.22022	-0.0869657	2.00494	1.3794
NM_001285860	Sgip1	421	2341	4944	1920	33.9797	31.3934	34.6141	33.3291	28	2	17	5	75	0	26	12	75	154.052	89.4237	169.868	2.21494	1.24489	2.69145	2.05043
NM_001290702	Tenm2	75	8277	9656	8202	51.6373	53.194	52.7648	52.532	139	5	82	4	211	7	134	78	204	185.858	136.065	108.159	2.21447	1.57771	1.70332	1.83183
NM_009098	Rps8	71	698	740	627	30.6149	26.3377	29.8683	28.9403	8	0	4	3	10	0	8	1	10	145.151	22.8194	69.356	2.21324	-0.640859	1.50366	1.02535
NM_028980	Ppp4r4	55	2683	3683	2628	18.5484	15.6551	22.2399	18.8144	28	0	15	5	38	0	28	10	38	121.207	54.4436	62.8796	2.20988	0.871779	1.68105	1.58757
NM_198010	Ankrd17	138	7197	9313	7059	19.6481	18.8894	19.4576	19.3317	83	7	79	7	209	5	76	72	204	122.48	145.936	125.672	2.20878	2.27802	2.65997	2.38226
NM_026376	Plxnd1	200	5978	6907	5778	5.13988	4.61476	3.71767	4.49077	34	0	21	2	71	0	34	19	71	66.9418	47.0488	53.4358	2.20742	1.51997	2.50692	2.07811
NM_008388	Eif3e	44	1382	1541	1338	3.03724	4.47935	2.63658	3.38439	8	1	7	1	22	0	7	6	22	59.5166	64.1605	71.502	2.20643	2.13706	3.13652	2.49334
NM_010633	Uhmk1	153	1413	2024	1260	5.4859	5.16578	5.8616	5.50442	8	0	6	3	21	0	8	3	21	72.2297	34.0662	72.477	2.19577	0.932146	2.79595	1.97462
NM_176893	Mink1	189	4116	4886	3927	27.9936	27.0707	21.5871	25.5505	50	3	48	4	130	5	47	44	125	136.155	160.311	138.421	2.19521	2.24636	2.59286	2.34481
NM_024272	Ssbp2	90	1176	6656	1086	14.0113	12.7803	13.9665	13.586	10	0	4	0	14	2	10	4	12	104.753	52.699	48.0511	2.19349	1.01997	1.53408	1.58251
NM_001163262	Cmip	83	2405	4529	2322	77.155	84.2294	85.9423	82.4422	47	2	59	2	136	2	45	57	134	220.469	351.225	250.954	2.19217	2.67564	2.58392	2.48391
NM_177608	Secisbp2l	248	3518	6797	3270	31.0967	29.3165	31.1552	30.5228	47	5	41	10	164	2	42	31	162	146.116	135.64	215.436	2.19107	1.89867	3.09942	2.39638
NM_172910	Dlgap2	351	3531	4510	3180	18.2605	17.0834	15.4591	16.9343	33	1	20	2	74	1	32	18	73	114.477	80.9875	99.8268	2.19022	1.50783	2.42583	2.04129
NM_144860	Mib1	680	3701	3793	3021	3.00612	2.7833	2.05666	2.61536	17	3	15	7	67	2	14	8	65	52.7198	37.8889	93.5651	2.18515	1.53168	3.71535	2.47739
NM_147176	Homer1	803	1904	4804	1101	40.9503	40.0631	43.7082	41.5739	18	2	8	2	21	1	16	6	20	165.321	77.9716	78.994	2.18502	0.914677	1.4232	1.50763
NM_177214	Snrnp200	90	6501	6740	6411	6.31625	6.79244	5.03953	6.04941	43	1	40	3	117	2	42	37	115	74.5281	82.575	78.0052	2.18468	2.15292	2.8321	2.3899
NM_001080932	Foxk2	144	2100	5032	1956	24.3712	26.2248	24.9333	25.1764	23	0	17	1	49	1	23	16	48	133.769	117.037	106.715	2.17849	1.80129	2.22848	2.06942
NM_145991	Cdc73	269	1865	7110	1596	1.85579	1.28494	1.64576	1.5955	6	0	2	0	7	0	6	2	7	42.7676	17.9296	19.0729	2.17795	0.748508	1.78681	1.57109
NM_001136085	Uba1	230	3407	4073	3177	28.2635	27.6642	22.9035	26.2771	43	5	39	8	126	5	38	31	121	136.07	139.61	165.623	2.17759	2.03008	2.83095	2.34621
NM_023543	Chn2	86	1085	2653	999	4.41046	2.18095	3.00167	3.19769	5	0	2	0	8	0	5	2	8	56.9378	28.6442	34.8238	2.17635	1.00764	2.14062	1.77487
NM_031174	Dscam	459	6501	7481	6042	12.3996	13.5148	13.1431	13.0192	58	4	32	5	114	2	54	27	112	101.674	63.9375	80.61	2.17585	1.3244	2.31202	1.93743
NM_001252436	Dlg1	433	2938	4513	2505	22.8711	20.8508	23.6234	22.4484	31	3	34	5	81	2	28	29	79	127.159	165.639	137.142	2.17375	2.37112	2.67531	2.40673
NM_001033213	Ttc7b	131	2663	3442	2532	35.3544	40.2855	37.0649	37.5683	38	3	18	2	87	6	35	16	81	157.254	90.4126	139.115	2.17323	1.18899	2.31466	1.89229
NM_027604	Usp15	104	3050	11549	2946	11.8604	11.8395	10.9481	11.5493	26	1	21	6	52	1	25	15	51	96.5392	72.8503	75.2816	2.1725	1.58449	2.30206	2.01968
NM_007841	Ddx6	306	1758	6008	1452	37.7578	37.3566	36.8967	37.3371	24	4	17	2	64	0	20	15	64	156.697	147.808	191.675	2.17179	1.90181	2.78162	2.28508
NM_133791	Wwc2	355	3919	5042	3564	6.16219	4.63057	5.31845	5.3704	22	0	13	2	40	0	22	11	40	70.2233	44.1598	48.8061	2.16983	1.32132	2.24374	1.91163
NM_175251	Arid2	173	5660	9029	5487	11.4483	11.6699	12.5098	11.876	49	2	26	4	87	2	47	22	85	97.4449	57.3668	67.3652	2.16935	1.22305	2.12111	1.83784
NM_178930	Gbf1	245	5831	6401	5586	9.78557	9.13448	8.65785	9.19263	45	2	28	5	127	0	43	23	127	87.5717	58.9114	98.8677	2.16791	1.41492	2.86423	2.14902
NM_001111304	Tbc1d9	723	4518	5848	3795	10.8301	10.8141	10.2547	10.633	32	1	20	1	76	1	31	19	75	92.9279	71.6332	85.9411	2.16679	1.60974	2.55431	2.11028
NM_020009	Mtor	120	7770	8595	7650	7.78586	7.65311	6.99616	7.47838	56	2	56	11	171	1	54	45	170	80.3024	84.1635	96.636	2.16593	2.05328	2.98409	2.4011
NM_177208	Dopey1	250	7639	9124	7389	5.03697	3.99409	5.84241	4.95783	46	2	27	8	100	0	44	19	100	67.7428	36.7909	58.8526	2.1656	1.10585	2.57297	1.94814
NM_173444	Nbeal1	328	8395	12108	8067	0.99928	0.855139	1.20802	1.02081	26	1	25	6	51	2	25	19	49	35.2553	33.6988	26.4141	2.16551	1.92658	2.58724	2.22644
NM_009125	Atxn2	27	3888	4472	3861	14.7971	16.2752	15.9902	15.6875	37	0	26	0	73	0	37	26	73	109.018	96.3487	82.2194	2.16532	1.80424	2.20251	2.05736
NM_001081242	Tln2	200	7829	12134	7629	10.0535	9.03501	8.96037	9.34961	68	9	67	9	212	5	59	58	207	87.9793	108.776	117.992	2.16452	2.28951	3.10682	2.52028
NM_001018042	Sp3	190	2542	4178	2352	21.3681	19.3399	20.0717	20.2599	28	3	12	5	51	2	25	7	49	120.92	42.5827	90.5963	2.16233	0.472912	2.15311	1.59612
NM_021323	Usp29	1416	4026	7476	2610	7.16632	5.63492	5.80424	6.20183	18	1	11	2	44	2	17	9	42	74.0977	49.3372	69.9778	2.1615	1.39497	2.65701	2.07116
NM_001081017	Unc79	695	8486	8870	7791	11.3335	12.4971	14.0166	12.6157	74	6	56	8	143	2	68	48	141	99.2915	88.1496	78.7005	2.16041	1.80657	2.30074	2.08924
NM_011323	Scn8a	54	5991	11241	5937	123.918	137.658	132.158	131.245	142	6	101	14	319	7	136	87	312	260.596	209.664	228.528	2.15623	1.65259	2.10462	1.97115
NM_170599	Igsf11	163	1450	3414	1287	11.6967	11.3582	13.1862	12.0804	11	0	3	0	20	0	11	3	20	97.2323	33.3515	67.5776	2.15603	0.430357	2.11302	1.56647
NM_152804	Plk2	133	2182	2802	2049	100.755	100.532	99.9357	100.408	42	0	29	5	92	2	42	24	90	233.187	167.588	191.008	2.15556	1.48998	2.04418	1.89657
NM_008569	Anapc1	267	6102	8967	5835	12.377	10.8676	11.6538	11.6328	51	2	69	4	146	2	49	65	144	95.5326	159.384	107.318	2.15309	2.70967	2.80825	2.557
NM_008615	Me1	164	1883	3257	1719	7.73546	6.76318	7.83404	7.44422	14	2	1153	645	60	6	12	508	54	79.4148	4228.25	136.606	2.15262	7.70675	3.48687	4.44875
NM_001100452	Gltscr1l	422	3647	6579	3225	31.234	27.5415	31.1501	29.9752	41	1	21	7	71	1	40	14	70	141.1	62.1113	94.3887	2.15146	0.782673	1.92224	1.61879
NM_017478	Copg2	97	2713	4016	2616	8.54238	11.3744	8.09357	9.33678	21	1	12	2	42	1	20	10	41	86.9738	54.6934	68.155	2.14875	1.29841	2.31603	1.92106
NM_001033222	Pdzd8	193	3637	7076	3444	16.522	17.3726	18.5119	17.4688	36	2	30	10	76	2	34	20	74	112.308	83.0882	93.4373	2.1441	1.52614	2.30739	1.99255
NM_053170	Trim33	586	4009	8870	3423	12.7032	12.108	14.6762	13.1625	33	3	25	1	54	1	30	24	53	99.7036	100.318	67.3318	2.14109	1.96768	2.04425	2.05101
NM_175513	Zfp804a	133	3736	4184	3603	14.8517	13.4166	9.63305	12.6338	32	1	38	3	60	2	31	35	58	97.8799	138.988	70.0028	2.1389	2.46264	2.13072	2.24409
NM_019439	Gabbr1	324	3207	4486	2883	105.365	120.631	108.72	111.572	68	7	67	10	197	8	61	57	189	240.703	282.88	285.081	2.13848	2.18205	2.54386	2.28813
NM_009429	Tpt1	173	692	894	519	50.571	46.5538	58.5359	51.8869	11	3	7	1	25	1	8	6	24	175.355	165.408	201.092	2.13792	1.86685	2.60717	2.20398
NM_175561	Pcnx2	236	6605	7236	6369	15.737	16.3853	15.9689	16.0304	65	5	63	12	129	2	60	51	127	107.171	114.57	86.7129	2.12778	2.04117	2.26327	2.14407
NM_001003912	Arhgef11	10	4669	5600	4659	3.99219	3.71599	3.45352	3.72057	29	5	23	2	88	1	24	21	87	58.6023	64.491	81.2041	2.12764	2.0877	3.24997	2.48844
NM_027626	Psd3	189	1320	9210	1131	51.8078	46.9856	50.4496	49.7477	20	3	17	3	52	1	17	14	51	170.995	177.108	196.092	2.12669	1.99069	2.60202	2.2398
NM_001168505	Shoc2	324	2073	4075	1749	15.4567	11.0851	18.3856	14.9758	21	5	13	2	40	2	16	11	38	104.07	89.9861	94.4812	2.12599	1.73351	2.43743	2.09898
NM_001035854	Ap2b1	164	3020	5411	2856	99.1225	103.818	94.0393	98.9931	61	4	36	6	137	3	57	30	134	227.046	150.292	204.032	2.12552	1.34134	2.14984	1.87223
NM_008580	Map3k5	80	4223	5393	4143	3.27756	3.27512	3.04365	3.19878	21	1	12	1	31	0	20	11	31	54.9176	37.9883	32.5386	2.12403	1.41474	2.04244	1.86041
NM_001033347	D430041D05Rik	171	4416	10124	4245	28.481	27.2826	27.4664	27.7433	52	2	32	1	76	4	50	31	72	133.995	104.486	73.7575	2.12305	1.57943	1.62371	1.7754
NM_009231	Sos1	530	4490	8919	3960	10.4674	9.10506	11.4614	10.3446	34	3	22	4	59	3	31	18	56	89.0559	65.0354	61.4956	2.12177	1.48682	2.0918	1.90013
NM_001164169	Pias2	188	1907	2073	1719	5.11604	4.79883	5.40945	5.10811	10	0	6	2	18	0	10	4	18	66.179	33.2933	45.5353	2.1141	0.943831	2.18074	1.74622
NM_177798	Frs2	355	1882	5684	1527	13.7881	12.0905	12.7808	12.8864	15	2	12	1	39	1	13	11	38	96.8502	103.069	108.217	2.11184	2.01942	2.74451	2.29192
NM_008844	Pip5k1c	96	2082	4288	1986	84.3363	83.3055	73.4897	80.3772	39	3	34	3	71	0	36	31	71	206.215	223.334	155.464	2.11087	2.03766	1.91186	2.02013
NM_023579	Ipo5	60	3354	4595	3294	21.4986	20.0148	21.0797	20.8644	38	4	29	8	96	1	34	21	95	117.423	91.2154	125.416	2.10246	1.5543	2.60053	2.08576
NM_001024955	Pik3r1	342	1707	5826	1365	19.4089	14.932	17.2673	17.2027	13	0	12	0	30	0	13	12	30	108.345	125.783	95.5741	2.10141	2.13356	2.35138	2.19545
NM_178060	Thra	518	1751	2336	1233	82.7439	77.1754	76.5981	78.8392	26	4	29	5	89	6	22	24	83	202.981	278.497	292.73	2.09959	2.3677	2.83915	2.43548
NM_175260	Myh10	299	6230	7783	5931	27.106	27.8849	26.1433	27.0447	73	5	46	11	124	3	68	35	121	130.43	84.4331	88.7174	2.09935	1.2873	1.90902	1.76522
NM_001252060	Cacna1a	281	7265	7778	6984	14.6339	15.387	17.1754	15.7321	70	6	64	4	178	2	64	60	176	104.249	122.919	109.587	2.0991	2.15391	2.61493	2.28931
NM_172120	Vps41	24	2586	3197	2562	20.3401	22.0356	18.1989	20.1915	30	4	14	3	50	1	26	11	49	115.449	61.4308	83.1703	2.09754	1.00363	2.03223	1.71113
NM_022997	Vps35	40	2431	3169	2391	41.1811	36.2605	41.1297	39.5238	39	7	21	4	97	3	32	17	94	152.253	101.728	170.962	2.09636	1.32869	2.5745	1.99985
NM_031881	Nedd4l	704	3272	8212	2568	52.4712	45.7858	53.0185	50.4252	42	4	40	5	93	4	38	35	89	168.339	195.005	150.712	2.09604	2.12146	2.21226	2.14326
NM_009720	Atox1	45	252	438	207	2.38725	3.24461	4.45257	3.36148	1	0	0	0	0	0	1	0	0	54.9574	1	1	2.0955	-3.86248	-3.01836	-1.59512
NM_001134459	Prickle2	286	2824	7878	2538	61.1488	58.0352	57.288	58.824	41	1	39	7	116	0	40	32	116	179.294	180.398	198.755	2.09516	1.91677	2.4974	2.16978
NM_001285811	Dtna	345	2058	2137	1713	1.23488	1.23503	0.53235	1.00075	5	0	7	0	11	0	5	7	11	33.2054	58.4673	27.9246	2.09092	2.73341	2.68216	2.50216
NM_019409	Omg	177	1509	2226	1332	66.9252	70.0447	62.131	66.3669	26	4	13	1	43	0	22	12	43	187.895	128.899	140.383	2.09083	1.35951	1.90646	1.7856
NM_001045524	Cep126	84	3396	3647	3312	3.69987	3.17306	3.29761	3.39018	16	0	11	3	24	0	16	8	24	54.9574	34.5599	31.5117	2.09043	1.24345	1.95316	1.76235
NM_027882	Cic	671	5486	6110	4815	25.1157	20.9499	18.9384	21.668	55	5	36	6	144	6	50	30	138	118.133	89.1451	124.633	2.08862	1.49852	2.56353	2.05022
NM_019967	Brinp1	434	2717	3354	2283	115.007	115.916	114.79	115.238	47	0	45	1	100	4	47	44	96	234.201	275.752	182.859	2.0797	2.12586	1.87928	2.02828
NM_032543	Rnf123	201	4146	4314	3945	2.14677	2.4001	1.28086	1.94258	15	0	14	2	35	0	15	12	35	43.2554	43.5218	38.5809	2.07698	1.90991	2.65745	2.21478
NM_001163643	Map3k12	427	3094	5528	2667	19.6805	19.0056	18.4039	19.03	26	0	22	3	80	1	26	19	79	110.904	101.93	128.812	2.07492	1.7697	2.70721	2.18394
NM_013762	Rpl3	80	1292	1361	1212	34.1332	37.6654	30.6887	34.1624	18	3	12	0	34	0	15	12	34	140.794	141.661	121.991	2.07038	1.89381	2.19552	2.05324
NM_001177720	Madd	84	4968	5905	4884	30.3891	32.7651	29.724	30.9594	61	3	55	9	245	1	58	46	244	135.098	134.758	217.253	2.06949	1.88075	3.10101	2.35042
NM_001042491	Anapc5	192	2376	2724	2184	24.2924	25.9738	27.2058	25.824	24	0	31	3	68	2	24	28	66	125.013	183.433	131.414	2.06569	2.43436	2.51005	2.3367
NM_001114096	Smarcc2	91	3484	4686	3393	42.2684	45.3178	41.5488	43.045	49	3	35	3	81	3	46	32	78	154.231	134.939	99.9683	2.0641	1.68512	1.73718	1.8288
NM_145452	Rasa1	579	3696	5101	3117	17.7456	15.3827	18.7975	17.3086	30	1	15	1	67	5	29	14	62	105.842	64.2634	86.4981	2.06404	1.16102	2.20289	1.80932
NM_001163387	Nlgn1	361	2806	4603	2445	28.9142	27.1914	29.7992	28.6349	28	0	16	1	60	0	28	15	60	130.279	87.7778	106.715	2.06362	1.30909	2.13318	1.8353
NM_172836	9930021J03Rik	135	6420	8026	6285	20.9252	21.1975	22.6384	21.587	66	2	48	4	91	2	64	44	89	115.843	100.166	61.5795	2.06262	1.66893	1.54913	1.76023
NM_198093	Elmo1	301	1045	4099	744	5.5877	4.03663	4.20273	4.60902	4	0	2	0	4	1	4	2	3	61.1622	38.4618	17.5348	2.06166	1.21366	0.880093	1.38514
NM_007804	Cux2	453	4734	5113	4281	5.55076	3.73242	4.54531	4.6095	23	0	18	0	37	0	23	18	37	61.1194	60.1589	37.5844	2.06059	1.85895	1.97993	1.96649
NM_010408	Hcn1	384	3117	7911	2733	17.3964	16.7836	15.9622	16.7141	27	2	19	0	63	1	25	19	62	104.063	99.4687	98.6515	2.06042	1.81222	2.41844	2.09703
NM_008851	Pitpnm1	563	4295	4512	3732	14.4562	15.1185	13.3271	14.3006	33	1	34	8	121	2	32	26	119	97.5449	99.6791	138.662	2.06007	1.90875	3.02506	2.33129
NM_015820	Hs6st3	150	1563	1784	1413	29.1379	30.1002	25.0519	28.0967	17	1	12	0	17	0	16	12	17	128.817	121.51	52.3189	2.05865	1.78961	1.11888	1.65571
NM_001267796	Igip	1082	1244	1378	162	92.2114	85.6721	99.3039	92.3958	3	0	1	0	4	0	3	1	4	210.67	88.3197	107.373	2.05863	0.615722	1.27475	1.31637
NM_172859	Dzank1	127	2464	6831	2337	19.8553	18.4118	21.7929	20.02	24	1	25	3	64	1	23	22	63	111.961	134.69	117.229	2.05837	2.14136	2.53373	2.24448
NM_009409	Top2b	473	5312	5633	4839	9.8734	7.42449	9.29009	8.86266	39	5	27	10	128	3	34	17	125	79.9318	50.265	112.333	2.05801	1.20784	3.0755	2.11378
NM_181750	R3hdm1	427	3835	4812	3408	70.072	81.7228	94.5324	82.1091	66	6	61	7	142	4	60	54	138	200.285	226.708	176.088	2.05607	2.04651	2.0758	2.05946
NM_007788	Csnk2a1	261	1437	4205	1176	34.9782	38.6245	39.7311	37.7779	16	1	5	1	37	1	15	4	36	145.104	48.6659	133.121	2.05391	0.292038	2.24701	1.53099
NM_001252105	Cadps2	284	4079	4849	3795	12.4247	13.2514	12.9036	12.8599	32	1	32	0	78	1	31	32	77	92.9279	120.645	88.2329	2.05342	2.24782	2.45149	2.25091
NM_172664	Tlk1	149	2450	4032	2301	24.6116	24.8236	27.5298	25.655	29	4	30	0	74	2	25	30	72	123.6	186.542	136.072	2.05321	2.46254	2.56515	2.3603
NM_198618	Dlgap3	296	3230	3884	2934	69.9821	61.2615	56.1954	62.4796	49	3	47	7	119	2	46	40	117	178.359	195.062	173.411	2.05167	1.99338	2.25597	2.10034
NM_001033322	Gucy1a2	454	2647	13727	2193	13.37	11.5139	14.2664	13.0501	19	1	13	2	64	2	18	11	62	93.3749	71.7673	122.943	2.05159	1.48964	2.91923	2.15349
NM_001085355	Arid1b	21	6756	11325	6735	18.1359	17.371	18.5551	18.0207	70	7	60	5	179	7	63	55	172	106.414	116.842	111.056	2.04779	1.99934	2.53359	2.19357
NM_025963	Rps10	39	537	573	498	5.56133	7.97199	5.1053	6.21287	3	0	3	0	4	0	3	3	4	68.5312	86.1915	34.9287	2.04777	2.19877	1.65321	1.96658
NM_172280	Emsy	135	3930	4026	3795	16.4363	15.5316	13.8864	15.2848	34	1	20	1	57	0	33	19	57	98.9233	71.6332	65.3152	2.04064	1.39219	1.8897	1.77418
NM_173369	Cyld	222	3081	8014	2859	21.7829	19.9625	19.4276	20.391	29	1	29	5	71	2	28	24	69	111.414	120.107	104.951	2.04036	1.96503	2.36052	2.12197
NM_001252332	2008-09-01	274	1564	4447	1290	18.0153	16.9145	19.552	18.1606	13	1	4	1	20	1	12	3	19	105.825	33.2739	64.0494	2.03516	0.182611	1.73383	1.3172
NM_133648	Slc12a6	0	3300	5956	3300	29.0672	30.2519	33.0986	30.8059	41	3	25	2	66	1	38	23	65	130.998	99.721	85.6546	2.028	1.44933	1.76192	1.74641
NM_001143834	Grm5	718	4330	8524	3612	98.7122	100.272	116.341	105.108	71	2	53	4	132	3	69	49	129	217.319	194.098	155.308	2.02662	1.67442	1.7118	1.80428
NM_001025572	Ankrd12	214	6340	8991	6126	55.3347	57.1961	59.4691	57.3333	95	4	52	2	166	2	91	50	164	168.99	116.779	116.418	2.02507	1.30477	1.74472	1.69152
NM_001291186	Abr	165	2091	4463	1926	221.255	210.435	201.665	211.118	51	2	50	5	156	4	49	45	152	289.425	334.294	343.193	2.02422	2.04067	2.33933	2.13474
NM_175466	Zfp770	137	2255	4263	2118	8.74822	6.31015	9.22579	8.09472	15	1	17	0	39	2	14	17	37	75.1966	114.841	75.9674	2.02394	2.45418	2.57828	2.35213
NM_001168304	Cdk19	286	1792	5807	1506	16.2055	13.128	17.0159	15.4498	13	0	6	2	16	0	13	4	16	98.2007	38.0021	46.2005	2.02366	0.471207	1.38224	1.29237
NM_001290469	Atp1a3	177	3219	3600	3042	198.75	216.047	174.437	196.411	85	10	74	8	272	9	75	66	263	280.478	310.425	375.966	2.02196	1.97708	2.52437	2.17447
NM_010106	Eef1a1	120	1509	1790	1389	515.938	498.987	530.411	515.112	61	10	70	9	170	6	51	61	164	417.7	628.348	513.444	2.02175	2.41641	2.26013	2.23276
NM_177750	Frmpd3	420	807	1401	387	4.05154	2.89822	6.49611	4.48196	2	0	0	0	3	0	2	0	3	58.7916	1	33.7102	2.0213	-4.03494	1.84376	-0.0566262
NM_197943	Sgsm2	199	3217	4760	3018	34.3832	32.1591	28.7822	31.7748	40	5	41	6	107	1	35	35	106	131.93	165.929	152.735	2.01976	2.16536	2.57342	2.25285
NM_001256382	Rims2	77	4796	7404	4719	10.0403	10.4334	9.70196	10.0586	37	3	24	0	101	3	34	24	98	81.9644	72.7669	90.3083	2.01878	1.66569	2.66694	2.11713
NM_007470	Apod	355	925	2074	570	1.10434	1.56621	2.66424	1.77826	2	0	5	0	4	0	2	5	4	39.9164	125.507	30.5166	2.01376	3.49085	2.38459	2.62973
NM_027118	Cdk13	446	4802	6901	4356	12.6625	12.1794	12.458	12.4333	36	2	23	1	53	2	34	22	51	88.7948	72.2616	50.9136	2.0079	1.52857	1.68321	1.73989
NM_199149	Ppp1r37	368	2507	2971	2139	40.0375	42.6745	37.1425	39.9515	27	0	22	1	63	2	27	21	61	143.598	140.469	124.014	2.00551	1.78777	2.10335	1.96555
NM_018813	Cpsf3	198	2253	2560	2055	1.10863	1.34818	1.01574	1.15752	6	0	3	1	13	0	6	2	13	33.2151	13.9249	27.5095	2.00458	0.576204	2.55281	1.7112
NM_001081383	Kmt2c	233	14948	16820	14715	15.7929	15.4981	17.5466	16.2792	143	15	129	12	302	4	128	117	298	98.9569	113.762	88.0658	2.00356	2.02173	2.2742	2.09983
NM_011931	Rfwd2	112	2314	5056	2202	6.46026	6.88646	5.78588	6.37753	15	2	13	0	43	2	13	13	41	67.1618	84.4692	80.9689	2.00305	2.15397	2.84679	2.33461
NM_029094	Pik3cb	348	3543	4854	3195	10.1244	11.0419	9.81006	10.3255	23	0	15	3	41	0	23	12	41	81.8942	53.7382	55.8039	2.00193	1.21265	1.95306	1.72255
NM_001163480	Neurl1a	220	1894	3680	1674	54.8381	48.769	44.8693	49.4921	23	0	11	1	34	0	23	10	34	156.303	85.4707	88.3232	2.00016	0.942646	1.45517	1.46599
NM_175749	Nup153	376	4765	6021	4389	10.8745	8.32851	12.9562	10.7197	33	1	31	7	87	0	32	24	87	82.9432	78.2381	86.1996	1.99795	1.73211	2.55263	2.09423
NM_033218	Srebf2	134	3527	4570	3393	28.4802	25.6552	25.8536	26.663	40	4	36	3	117	1	36	33	116	120.702	139.156	148.671	1.996	2.01664	2.66437	2.22567
NM_001081016	Zc3h7b	505	3454	5958	2949	17.742	18.111	15.3572	17.0701	28	2	29	5	81	1	26	24	80	100.299	116.442	117.969	1.9947	2.02688	2.66083	2.22747
NM_153396	Mical3	294	2889	2929	2595	3.97786	4.08951	5.04924	4.3722	13	0	8	2	21	1	13	6	20	56.9905	33.0816	33.5154	1.99119	1.02788	1.85375	1.62427
NM_172261	Ppp1r9b	336	2790	4330	2454	180.766	167.386	147.918	165.357	62	7	78	12	187	10	55	66	177	254.967	384.806	313.654	1.98699	2.39014	2.39036	2.25583
NM_175291	Dock10	105	6669	7308	6564	11.3168	11.3067	10.3854	11.003	54	6	47	5	161	3	48	42	158	83.1896	91.5489	104.674	1.98668	1.94315	2.81347	2.24777
NM_001290818	Adrbk1	208	2278	3379	2070	40.3311	36.4102	35.3511	37.3641	26	1	31	1	69	1	25	30	68	137.393	207.359	142.853	1.9817	2.38979	2.35696	2.24282
NM_018797	Plxnc1	0	4725	7045	4725	6.48099	6.58482	6.98981	6.68521	31	3	20	3	50	0	28	17	50	67.4144	51.4778	46.0171	1.98038	1.41125	1.99671	1.79612
NM_001130169	Zfp207	176	1664	2362	1488	28.7322	24.4965	32.4074	28.5454	18	2	9	2	35	4	16	7	31	122.324	67.3081	90.5963	1.97459	0.927896	1.89927	1.60059
NM_172289	Slc36a4	23	1526	1937	1503	4.11286	3.14435	4.11121	3.78947	7	0	4	0	11	1	7	4	10	52.9829	38.0779	28.9329	1.97127	1.31656	1.74754	1.67846
NM_198298	Helz	96	5994	6218	5898	5.82153	6.25255	5.7501	5.94139	34	1	29	3	70	0	33	26	70	63.651	63.0727	51.6113	1.96783	1.77503	2.24956	1.99747
NM_001114399	Zmym4	69	4719	7010	4650	10.5478	10.7013	10.5023	10.5838	37	4	32	2	74	2	33	30	72	80.7342	92.3083	67.3335	1.96662	1.97835	2.20572	2.05023
NM_001301737	Dnm1	120	2676	3285	2556	206.456	206.45	185.92	199.608	63	2	52	4	141	8	61	48	133	271.497	268.691	226.278	1.96539	1.75911	1.77991	1.8348
NM_007868	Dmd	247	11284	13852	11037	5.55353	5.65736	6.30036	5.83708	63	2	55	7	140	3	61	48	137	62.8746	62.2247	53.9785	1.96068	1.76612	2.32737	2.01806
NM_009261	Strbp	167	2186	16348	2019	20.0255	18.9012	24.9624	21.2964	24	5	18	1	34	2	19	17	32	107.057	120.472	68.9232	1.9569	1.94336	1.7217	1.87399
NM_177038	Trappc8	11	4325	5178	4314	9.20244	8.72383	10.4203	9.44885	31	2	23	1	61	5	29	22	56	76.4741	72.9651	56.4494	1.95603	1.70709	2.03533	1.89949
NM_178880	Son	84	7419	8451	7335	133.725	134.578	142.596	136.966	159	11	126	15	388	12	148	111	376	229.54	216.519	222.915	1.94772	1.67342	2.03715	1.8861
NM_007619	Cbl	158	2900	5083	2742	9.14913	7.24929	10.7749	9.05778	20	2	16	1	49	3	18	15	46	74.6795	78.2702	72.9528	1.94697	1.83369	2.43663	2.07243
NM_181399	Usp6nl	56	2585	4663	2529	1.83661	1.06669	1.74264	1.54865	8	0	10	1	22	0	8	9	22	35.9863	50.9174	37.829	1.94665	2.27219	2.79685	2.33856
NM_201616	Gnas	226	1411	1767	1185	255.015	244.842	272.704	257.52	33	2	38	7	104	3	31	31	101	297.605	374.297	370.642	1.94598	2.08463	2.30324	2.11128
NM_001162864	Ttbk1	304	4231	6959	3927	16.5995	15.7246	13.8488	15.391	33	1	34	3	72	1	32	31	71	92.7012	112.947	78.6229	1.94279	2.04498	2.15211	2.04663
NM_001290656	Mbd5	194	4691	5301	4497	16.3623	15.9322	14.9918	15.7621	41	4	39	4	103	2	37	35	101	93.5998	111.357	97.6675	1.94251	2.01025	2.44739	2.13338
NM_176850	Bptf	0	8766	11488	8766	24.8523	25.0948	28.8595	26.2689	97	8	62	7	196	7	89	55	189	115.501	89.7705	93.7588	1.94133	1.39318	2.0103	1.7816
NM_008155	Gpi1	123	1800	2887	1677	73.0743	81.644	65.0188	73.2457	27	1	29	1	73	2	26	28	71	176.375	238.89	184.11	1.94076	2.19049	2.22464	2.11863
NM_172926	Snx14	63	2958	3112	2895	2.33597	2.31594	2.66339	2.43843	11	0	5	0	15	3	11	5	12	43.2255	24.7112	18.0254	1.94045	0.957057	1.39127	1.42959
NM_025370	Aaed1	26	707	972	681	1.58799	1.67095	0.668802	1.30925	2	0	0	0	1	0	2	0	1	33.4102	1	6.38564	1.9396	-3.29723	0.354587	-0.334345
NM_054081	Mta1	140	2237	2775	2097	14.3184	17.4122	14.1728	15.3011	19	2	10	1	31	1	17	9	30	92.2246	61.4068	62.212	1.93885	1.16932	1.81868	1.64228
NM_207255	Zfp532	405	3516	5503	3111	23.8234	22.5414	23.9806	23.4485	30	0	18	1	46	2	30	17	44	109.703	78.1846	61.5041	1.93474	1.26191	1.48612	1.56092
NM_175021	Samd4b	260	2324	4391	2064	19.0842	18.263	17.9137	18.4203	19	1	11	3	26	0	18	8	26	99.2108	55.4565	54.7791	1.93359	0.911065	1.49776	1.44747
NM_177644	Rasal2	657	4518	10046	3861	30.0254	26.7164	32.2579	29.6666	43	2	30	4	88	1	41	26	87	120.804	96.3487	97.9876	1.93358	1.42229	1.98389	1.77992
NM_175457	Mroh1	218	5141	5269	4923	1.10563	1.15593	1.44968	1.23708	14	0	5	1	53	1	14	4	52	32.3515	11.6253	45.933	1.92695	0.275954	3.24319	1.81536
NM_013876	Rnf11	273	738	2132	465	70.4831	63.2771	75.771	69.8437	7	0	2	0	8	1	7	2	7	171.254	61.5389	65.4631	1.92661	0.262229	0.768036	0.985624
NM_029709	Clasp1	748	5131	7599	4383	16.7019	15.9231	16.5534	16.3928	39	3	30	2	99	3	36	28	96	93.4388	91.4027	95.247	1.91663	1.70185	2.38214	2.00021
NM_001081251	Pbrm1	311	5426	8117	5115	13.3603	13.4438	14.4959	13.7667	41	2	36	1	81	1	39	35	80	86.7392	97.9028	68.0136	1.91338	1.90562	2.02555	1.94818
NM_001163467	Phtf1	155	2441	2923	2286	10.2887	11.7728	11.6204	11.2273	16	0	5	2	14	0	16	3	14	79.6233	18.7766	26.632	1.91144	-0.354555	0.823854	0.793579
NM_011889	2003-09-01	148	1162	4731	1014	114.517	108.419	97.4907	106.809	22	4	18	1	57	4	18	17	53	201.944	239.874	227.295	1.91119	1.97029	2.24935	2.04361
NM_027088	Bap1	129	2316	3406	2187	35.1726	34.9891	30.2039	33.4552	26	2	26	4	76	0	24	22	76	124.841	143.928	151.118	1.90936	1.92925	2.51991	2.11951
NM_001163623	Prepl	210	2127	3294	1917	42.6415	32.4191	37.2994	37.4533	24	2	15	4	53	1	22	11	52	130.556	82.1	117.959	1.90663	1.05168	2.07895	1.67909
NM_001145836	Ralgds	87	2775	3590	2688	29.0565	29.2937	23.1782	27.1761	27	0	21	0	44	0	27	21	44	114.27	111.78	71.1828	1.90563	1.68917	1.58774	1.72751
NM_009048	Reps1	23	2411	2618	2388	3.86082	3.64475	4.90412	4.13656	13	2	7	0	24	1	11	7	23	52.4028	41.9408	41.8837	1.90314	1.40342	2.21634	1.84096
NM_001081302	Trio	352	9664	11497	9312	21.6367	22.2497	21.133	21.6731	95	10	80	12	266	6	85	68	260	103.842	104.481	121.418	1.90246	1.72739	2.52564	2.05183
NM_029935	Chst15	560	2246	4265	1686	25.2984	21.3968	24.7684	23.8212	17	1	20	0	32	0	16	20	32	107.959	169.725	82.5361	1.90222	2.37069	1.89879	2.05723
NM_145941	Eif4g1	184	4987	5439	4803	26.0171	27.9391	23.3664	25.7742	52	5	49	12	199	7	47	37	192	111.322	110.22	173.836	1.8995	1.70065	2.91508	2.17175
NM_177215	Ocrl	197	2900	5184	2703	18.4124	17.8974	18.8727	18.3942	24	1	25	1	44	2	23	24	42	96.8006	127.039	67.5701	1.89895	2.10776	1.80157	1.93609
NM_176832	Spire1	131	1679	4761	1548	29.9103	27.7602	30.7219	29.4641	17	1	12	2	36	1	16	10	35	117.583	92.4276	98.3215	1.89868	1.36645	1.99387	1.753
NM_012026	Arhgef28	104	5207	6259	5103	6.40389	8.49836	5.94613	6.94946	32	3	22	1	74	3	29	21	71	64.65	58.8798	60.504	1.89686	1.58184	2.36287	1.94719
NM_028096	2010300C02Rik	252	3780	4361	3528	217.684	222.037	209.81	216.51	88	5	62	11	226	1	83	51	225	267.637	206.83	277.335	1.89627	1.33288	2.01327	1.74747
NM_001099637	Cep170	166	4903	6930	4737	15.584	15.5414	16.9789	16.0348	39	1	37	3	101	5	38	34	96	91.2592	102.695	88.1291	1.89574	1.88314	2.28643	2.02177
NM_001170967	Wdr33	221	989	1148	768	1.64814	1.23793	0.283134	1.0564	3	1	1	0	4	0	2	1	4	29.6255	18.6299	22.6491	1.89408	1.05096	2.34001	1.76168
NM_001040682	Clmn	125	3191	11869	3066	10.8275	9.43345	9.07827	9.77973	21	1	17	3	38	1	20	14	37	74.2086	65.3324	52.4785	1.89213	1.52705	1.90462	1.7746
NM_001164483	Synj1	118	4942	7085	4824	81.8938	78.8297	88.5653	83.0963	82	6	84	13	215	5	76	71	210	179.227	210.583	189.306	1.88868	1.9329	2.17137	1.99765
NM_175114	Trak1	146	2966	4886	2820	46.9277	42.2785	41.4779	43.5614	35	1	37	2	79	1	34	35	78	137.16	177.579	120.281	1.88776	2.07412	1.99521	1.9857
NM_001291077	Snph	292	1672	4543	1380	127.87	111.476	111.184	116.843	29	4	15	4	51	1	25	11	50	206.09	114.048	157.559	1.88698	0.843825	1.65419	1.46167
NM_001081678	Zfp800	180	2169	3895	1989	5.01109	3.805	3.42145	4.07918	9	0	3	0	17	1	9	3	16	51.4759	21.5804	34.9814	1.88572	0.453161	1.96688	1.43525
NM_010307	Gnal	266	1412	5489	1146	31.1139	29.2195	32.9538	31.0957	13	1	4	0	19	1	12	4	18	119.122	49.9399	68.3029	1.88531	0.446009	1.42841	1.25324
NM_018860	Rpl41	94	172	449	78	269.361	264.74	286.67	273.59	2	0	1	1	2	0	2	0	2	291.697	1	111.503	1.88097	-6.49969	0.525479	-1.36442
NM_175642	Adgrb3	261	4830	5522	4569	28.2319	27.7949	29.8432	28.6233	48	2	24	5	82	3	46	19	79	114.534	59.4984	75.1895	1.87803	0.74833	1.62833	1.41823
NM_001081353	2210408I21Rik	96	1071	1749	975	2.19207	3.36626	4.27437	3.27756	4	0	1	0	6	0	4	1	6	46.6715	14.6747	26.7607	1.8748	0.0279283	1.7424	1.21504
NM_001170745	Magi2	567	3864	6530	3297	21.899	21.2969	24.5147	22.5702	36	6	22	3	85	1	30	19	84	103.514	82.4531	110.793	1.87372	1.36148	2.3635	1.86623
NM_134013	Psme4	208	5740	6442	5532	7.71371	8.22543	8.57752	8.17222	35	2	25	6	96	2	33	19	94	67.8622	49.141	73.892	1.8702	1.22383	2.53126	1.8751
NM_139149	Fus	86	1643	1845	1557	6.66582	7.09745	8.98478	7.58268	10	1	9	1	30	0	9	8	30	65.7582	73.5147	83.7884	1.8694	1.84982	2.76803	2.16242
NM_001278075	Farsb	55	1825	2091	1770	1.38111	1.84475	3.0312	2.08569	6	0	9	1	18	0	6	8	18	38.5633	64.668	44.2233	1.86895	2.43861	2.80174	2.36977
NM_009782	Cacna1e	1	6823	12697	6822	64.5949	58.7378	63.6149	62.3159	103	9	70	15	219	8	94	55	211	156.752	115.352	134.5	1.86694	1.23706	1.89132	1.66511
NM_026137	Wdr13	531	1989	4233	1458	62.6361	64.0523	58.3578	61.6821	20	0	21	2	53	3	20	19	50	156.052	186.453	149.13	1.86657	1.93596	2.04785	1.95013
NM_029851	Dync2h1	89	13010	13972	12921	1.5787	1.63468	1.84945	1.68761	42	2	38	4	111	2	40	34	109	35.2176	37.6492	36.6844	1.86427	1.78514	2.6889	2.11277
NM_177682	Ccz1	41	1484	1769	1443	6.1641	5.9678	8.63582	6.92257	8	0	1	0	4	1	8	1	3	63.0696	9.91531	9.04079	1.86347	-0.985884	-0.376768	0.166939
NM_001294143	Hipk2	373	3883	4178	3510	3.58716	3.13423	2.68401	3.13513	15	1	18	2	60	1	14	16	59	45.3751	65.2207	73.0965	1.86064	2.20656	3.22498	2.43073
NM_011300	Rps7	107	692	961	585	2.07248	3.06326	1.35291	2.16288	4	2	3	1	8	1	2	2	7	38.8929	48.9155	52.0348	1.85956	2.01407	3.0095	2.29438
NM_199306	Wdtc1	419	2453	4175	2034	11.6279	12.2298	11.4444	11.7674	17	3	15	1	42	0	14	14	42	78.3021	98.4804	89.7945	1.85929	2.00818	2.54254	2.13667
NM_001081170	Pacs2	56	2735	5480	2679	13.8289	11.9478	12.1889	12.6552	22	3	25	4	74	2	19	21	72	80.6821	112.155	116.872	1.85913	2.15216	2.86892	2.2934
NM_153588	Mkl2	218	3461	8295	3243	91.269	86.9474	95.1602	91.1255	58	6	44	7	145	4	52	37	141	182.412	163.24	189.07	1.8591	1.51021	2.10128	1.82353
NM_001113389	Dyrk1a	146	2438	5756	2292	23.5808	22.7322	24.4795	23.5975	23	2	24	0	57	2	21	24	55	104.232	149.82	104.352	1.85716	2.19638	2.24413	2.09923
NM_172663	Epc2	320	2747	4358	2427	14.133	11.6464	11.2249	12.3348	20	3	14	2	36	2	17	12	34	79.6848	70.7431	60.9201	1.85647	1.5027	1.94796	1.76904
NM_001253905	Ncor2	370	7132	8146	6762	36.5519	34.9665	34.0958	35.2047	79	6	62	7	177	4	73	55	173	122.813	116.375	111.256	1.85534	1.59213	2.04038	1.82928
NM_001098528	Kcnb2	0	2724	5309	2724	7.52168	7.01718	6.18361	6.90749	17	2	17	0	33	1	15	17	32	62.6441	89.2924	51.0851	1.855	2.18623	2.12323	2.05482
NM_026614	Ndufa5	141	492	549	351	8.70667	6.4715	7.40067	7.52628	2	0	1	0	1	0	2	1	1	64.8215	40.7629	12.3892	1.85315	1.00352	0.0158927	0.957521
NM_198292	Tex2	98	3485	4942	3387	35.1521	38.6568	35.4503	36.4197	38	1	34	4	90	1	37	30	89	124.275	126.73	114.268	1.85218	1.69476	2.0538	1.86691
NM_001163635	Tnks2	306	3807	6481	3501	46.5569	46.0484	45.2876	45.9643	43	1	29	6	127	1	42	23	126	136.475	93.9958	156.506	1.84853	1.12414	2.33527	1.76931
NM_133853	Magi3	440	3821	6672	3381	4.75375	3.6058	4.06784	4.14246	15	0	12	1	27	0	15	11	27	50.4711	46.55	34.7272	1.8481	1.55299	1.94496	1.78202
NM_027629	Pgm2l1	317	2183	8626	1866	97.2044	102.251	104.885	101.447	33	2	41	3	92	5	31	38	87	188.993	291.37	202.749	1.84627	2.28174	2.12261	2.08354
NM_001291119	Neurl4	82	4702	5195	4620	13.5812	13.5998	12.3883	13.1898	35	2	39	2	86	3	33	37	83	81.2584	114.586	78.1246	1.84473	2.1583	2.2572	2.08674
NM_001033268	Fam120a	0	3339	4919	3339	52.008	47.5667	48.2369	49.2706	44	3	31	8	96	2	41	23	94	139.689	98.5562	122.423	1.84071	1.15085	1.9295	1.64035
NM_026003	Smarca2	300	1011	1962	711	50.4511	48.6855	60.2198	53.1188	9	0	8	2	26	1	9	6	25	144.002	120.741	152.905	1.83974	1.39867	2.19458	1.811
NM_028007	Itfg1	211	2044	3355	1833	51.0082	53.9168	51.6379	52.1876	24	1	12	0	33	0	23	12	33	142.745	93.668	78.2894	1.83764	1.04298	1.24193	1.37418
NM_009169	Shfm1	104	317	491	213	3.8535	5.37528	5.29593	4.84157	1	0	0	0	0	0	1	0	0	53.4093	1	1	1.83677	-4.0812	-3.2885	-1.84431
NM_001290770	Tro	66	6330	7153	6264	60.2605	54.6647	48.9397	54.6216	82	2	58	13	188	8	80	45	180	145.29	102.786	124.96	1.83595	1.14967	1.88276	1.62279
NM_027144	Arhgef12	508	5143	10483	4635	29.8425	26.5516	29.0838	28.4926	52	7	45	10	162	3	45	35	159	110.448	108.042	149.176	1.82836	1.61174	2.62013	2.02007
NM_009384	Tiam1	503	5279	7290	4776	34.2392	32.3468	31.3668	32.6509	52	3	42	6	92	1	49	36	91	116.715	107.848	82.8569	1.82677	1.52748	1.67095	1.67507
NM_001198787	Aatk	138	4092	5183	3954	75.2873	68.0585	61.3326	68.2261	56	1	46	3	152	3	55	43	149	158.242	155.598	163.871	1.82657	1.61453	2.10919	1.8501
NM_144825	Taok1	698	3704	12409	3006	30.3306	29.3429	31.9956	30.5564	38	8	29	3	100	2	30	26	98	113.535	123.753	141.771	1.82643	1.7657	2.49491	2.02901
NM_198007	Ascc3	271	6868	7477	6597	2.13096	2.45731	2.6083	2.39886	24	1	18	4	60	1	23	14	59	39.6623	30.3637	38.8917	1.82609	1.26405	2.51282	1.86765
NM_177327	Wwp1	283	3040	6458	2757	5.87503	6.17737	5.88873	5.98038	14	0	12	1	42	1	14	11	41	57.768	57.0858	64.6694	1.82401	1.62722	2.57011	2.00712
NM_001093776	Myt1l	818	4376	7104	3558	78.8993	70.8027	71.834	73.8453	56	5	37	2	122	5	51	35	117	163.065	140.746	142.998	1.8227	1.42235	1.85403	1.69969
NM_001129787	Igsf9b	226	4213	4239	3987	5.10951	5.02881	5.29078	5.14303	19	0	17	4	38	2	19	13	36	54.213	46.6519	39.2652	1.82231	1.42645	1.96196	1.73691
NM_001302635	Phactr1	176	1919	5256	1743	93.3018	98.7096	100.307	97.4393	29	1	22	5	55	2	28	17	53	182.75	139.548	132.23	1.82184	1.24382	1.53581	1.53382
NM_144922	Hnrnpul1	85	2665	2876	2580	14.6119	12.5299	11.8668	13.0029	20	2	12	2	49	1	18	10	48	79.3687	55.4565	80.9046	1.81929	1.11985	2.31821	1.75245
NM_178651	Slc30a9	140	1844	3410	1704	33.8172	29.7088	29.6919	31.0726	19	2	13	5	69	1	17	8	68	113.495	67.1727	173.536	1.81593	0.874136	2.77418	1.82142
NM_001004164	Gnptab	7	3715	5204	3708	17.2413	17.5165	17.1138	17.2906	35	6	24	4	76	1	29	20	75	88.9723	77.1725	87.9575	1.81418	1.42574	2.2278	1.82257
NM_182993	Slc17a7	162	1845	2940	1683	447.8	465.979	400.548	438.109	54	4	59	7	154	4	50	52	150	337.973	442.071	387.578	1.81272	2.00619	1.97428	1.93106
NM_001109042	Kif21a	249	4953	6128	4704	27.4795	28.0279	33.9465	29.8179	50	4	30	2	104	2	46	28	102	111.247	85.1654	94.2941	1.81164	1.24124	1.92469	1.65919
NM_001243044	Ap1b1	254	3095	4097	2841	25.9955	25.3218	24.9114	25.4095	27	1	26	3	84	2	26	23	82	104.111	115.832	125.515	1.81138	1.78084	2.45576	2.01599
NM_013883	Scmh1	459	2454	3394	1995	16.7242	16.5694	14.1258	15.8065	15	0	14	1	30	0	15	13	30	85.5352	93.2337	65.3928	1.81084	1.7523	1.86656	1.8099
NM_001033962	Ube3a	563	3113	4910	2550	55.2673	58.88	62.4258	58.8577	36	3	29	1	69	2	33	28	67	147.221	157.105	114.258	1.81047	1.71698	1.69828	1.74191
NM_001291068	Polr2a	410	6323	6736	5913	18.3687	16.0795	14.8863	16.4448	46	1	26	4	94	2	45	22	92	86.5767	53.2338	67.6599	1.8047	0.920055	1.88642	1.53706
NM_015771	Lats2	436	3565	5191	3129	3.44347	3.81323	4.19525	3.81731	14	1	15	0	50	0	13	15	50	47.2644	68.5896	69.489	1.80213	2.1612	3.0062	2.32318
NM_009027	Rasgrf2	0	3261	7286	3261	23.1462	20.8426	22.4618	22.1502	30	2	13	5	53	0	28	8	53	97.6795	35.1004	70.6767	1.80122	0.140656	1.72885	1.22358
NM_023565	Cse1l	92	3008	3604	2916	9.57418	11.21	9.19918	9.99447	20	2	12	1	34	1	18	11	33	70.2233	53.9731	49.2128	1.79954	1.23848	1.79585	1.61129
NM_177855	Med12l	24	6582	10249	6558	4.03713	3.71414	3.59955	3.78361	29	2	24	3	60	1	27	21	59	46.837	45.8163	39.123	1.79431	1.58439	2.184	1.85423
NM_008702	Nlk	1159	2743	4496	1584	20.0782	17.6559	22.6283	20.1208	13	0	9	0	15	0	13	9	15	93.3651	81.2943	41.1801	1.79333	1.40993	1.0207	1.40799
NM_010199	Fgf12	228	774	5408	546	16.637	13.3269	16.1377	15.3672	4	0	2	0	4	0	4	2	4	83.3419	52.4095	31.858	1.79017	0.938169	0.849957	1.19276
NM_013675	Sptb	667	7657	10394	6990	50.6967	46.4677	43.3269	46.8304	84	3	84	8	255	6	81	76	249	131.827	155.564	154.908	1.78741	1.83979	2.30664	1.97795
NM_138682	Lrrc4	133	2092	3622	1959	68.817	60.3119	66.0485	65.0591	28	2	13	2	57	0	26	11	57	150.985	80.3398	126.53	1.78718	0.689387	1.7713	1.41595
NM_001004177	Celsr2	0	8754	10401	8754	49.9923	47.6466	44.9071	47.5153	111	9	117	14	394	5	102	103	389	132.553	168.346	193.239	1.78668	1.94501	2.61487	2.11552
NM_001122989	Cdc14b	85	1432	5595	1347	2.81216	2.75773	3.39852	2.98947	5	0	1	0	3	0	5	1	3	42.2278	10.622	9.68512	1.7853	-0.383194	0.34424	0.582115
NM_001290633	Reps2	151	2095	7686	1944	43.0281	38.1554	37.9126	39.6987	24	3	16	1	91	2	21	15	89	122.891	110.4	199.088	1.78463	1.44406	2.79096	2.00655
NM_001199247	Kat5	65	1451	1855	1386	12.6693	11.5464	10.601	11.6055	9	0	4	0	12	0	9	4	12	73.8713	41.2923	37.6504	1.78351	0.762517	1.29883	1.28162
NM_027498	Sik3	38	4148	6287	4110	18.1599	15.807	16.1045	16.6905	32	1	23	2	73	0	31	21	73	85.8057	73.1055	77.2383	1.78295	1.3688	2.06646	1.73941
NM_011949	Mapk1	245	1322	5099	1077	195.542	179.768	188.654	187.988	25	3	8	1	38	0	22	7	38	232.382	92.994	153.433	1.77671	0.264324	1.26383	1.10162
NM_028627	Psd	213	3288	3900	3075	104.894	101.12	89.1353	98.3828	49	1	64	4	134	3	48	60	131	177.579	279.176	185.258	1.77469	2.23845	2.01516	2.00943
NM_001122768	Lrrc8d	433	3013	3923	2580	16.8044	16.6639	14.5824	16.0169	19	0	12	1	44	1	19	11	43	83.778	61.0022	72.477	1.77301	1.13238	2.00517	1.63685
NM_001289702	Pde4dip	37	7276	8260	7239	25.9445	23.7799	22.3119	24.0121	67	4	60	8	173	1	63	52	172	99.0053	102.777	103.324	1.77255	1.64224	2.21696	1.87725
NM_177832	Zfp236	37	5437	9473	5400	9.79216	8.02608	8.56085	8.79303	31	0	30	3	68	0	31	27	68	65.3077	71.5389	54.7604	1.77119	1.72174	2.04477	1.8459
NM_011417	Smarca4	260	5105	6367	4845	21.0285	20.4391	18.3526	19.9401	41	2	27	4	110	4	39	23	106	91.5729	67.9214	95.1401	1.77075	1.15605	2.23549	1.72076
NM_001034907	Zc3h12b	857	3365	3365	2508	3.92116	2.92614	4.10523	3.65084	11	1	6	2	29	0	10	4	29	45.3596	22.8194	50.2831	1.76936	0.600208	2.5725	1.64736
NM_001177630	Etl4	345	4389	5714	4044	6.63128	4.90318	7.08211	6.20553	20	0	11	2	52	1	20	9	51	56.262	31.8423	54.8416	1.76387	0.76288	2.30494	1.61056
NM_145515	Mark1	77	2465	4565	2388	19.1203	19.0568	20.7554	19.6442	19	0	6	3	23	1	19	3	22	90.514	17.9746	40.0627	1.76288	-0.752894	0.998764	0.669585
NM_028262	Setd3	139	1924	2725	1785	42.6652	44.1802	48.2487	45.0313	22	2	12	2	41	0	20	10	41	127.464	80.1557	99.8843	1.76221	0.906644	1.70256	1.45714
NM_198862	Nlgn2	411	2922	5002	2511	97.8107	108.227	91.8189	99.2856	41	2	31	9	114	2	39	22	112	176.691	125.357	193.965	1.762	1.07784	2.07466	1.63817
NM_001031814	Smg1	347	11324	15553	10977	22.8612	21.0617	26.6354	23.5194	104	10	74	14	242	1	94	60	241	97.4183	78.206	95.4739	1.7616	1.26049	2.11831	1.71347
NM_001024837	Adarb1	395	2531	6586	2136	30.4146	27.2964	29.9572	29.2227	20	0	10	0	35	1	20	10	34	106.519	66.984	69.2196	1.761	0.906874	1.49363	1.38717
NM_019945	Mast1	76	4789	4922	4713	25.1688	22.5624	21.4292	23.0535	41	1	33	3	92	0	40	30	92	96.5515	91.0744	84.8871	1.76064	1.49225	1.96356	1.73882
NM_145421	Abhd17a	351	1284	1473	933	56.8898	46.5857	49.9803	51.152	11	0	2	1	30	0	11	1	30	134.124	15.3353	139.827	1.75971	-1.55571	2.09352	0.765843
NM_030732	Tbl1xr1	415	1960	8127	1545	19.0171	17.9613	18.9375	18.6386	14	2	8	0	21	0	12	8	21	88.3586	74.0856	59.1075	1.75944	1.32184	1.59875	1.56001
NM_001289685	Iqsec3	744	3432	6575	2688	32.4117	29.4109	33.7149	31.8458	31	5	22	4	74	2	26	18	72	110.037	95.8111	116.481	1.75665	1.37172	2.18083	1.76973
NM_009741	Bcl2	1410	2121	7209	711	1.73361	1.4081	1.66825	1.60332	2	0	0	0	1	0	2	0	1	32.0005	1	6.1162	1.75661	-3.41869	0.142374	-0.506568
NM_001161854	Csde1	548	2852	4105	2304	45.0851	42.6565	51.1905	46.3107	32	6	30	6	85	2	26	24	83	128.377	149.039	156.656	1.7558	1.78467	2.33109	1.95719
NM_023374	Sdhb	134	983	1074	849	0.78813	1.32322	1.05925	1.05687	2	0	0	1	5	0	2	-1	5	26.799	1	25.6102	1.74916	-3.16885	2.51695	0.365752
NM_173756	Lin52	5	356	2144	351	8.43015	7.38599	11.1428	8.98633	2	0	0	0	2	0	2	0	2	64.8215	1	24.7785	1.74745	-4.45195	0.884622	-0.606627
NM_001044308	Cacna1i	561	7161	9794	6600	12.5978	13.1526	11.599	12.4498	47	4	47	3	130	2	43	44	128	74.1175	95.3853	84.3369	1.74645	1.92832	2.41034	2.02837
NM_153459	Dusp7	166	1435	3213	1269	56.7338	47.7062	53.8189	52.753	18	3	3	1	42	1	15	2	41	134.47	22.5497	140.499	1.74506	-1.01793	2.07762	0.934918
NM_001289472	Pitpnm2	342	4350	6924	4008	106.306	101.847	96.3048	101.486	65	3	57	9	173	4	62	48	169	175.979	171.351	183.362	1.74311	1.51561	1.97733	1.74535
NM_001081056	Xpot	286	3175	5989	2889	15.2225	16.5087	17.4215	16.3842	23	2	9	1	58	4	21	8	54	82.6929	39.62	81.2826	1.74068	0.496155	2.1538	1.46355
NM_022022	Ube4b	726	4248	5508	3522	20.3125	20.6043	20.2706	20.3958	29	1	25	4	86	0	28	21	86	90.4409	85.3105	106.184	1.73934	1.47136	2.37721	1.86263
NM_019413	Robo1	991	5830	7568	4839	4.07252	4.96283	3.56476	4.20004	20	0	9	2	34	3	20	7	31	47.0187	20.6974	27.8585	1.73765	0.375384	1.61679	1.24328
NM_001198969	Itsn2	257	2216	2350	1959	3.8138	3.0669	2.00555	2.96208	7	0	8	2	16	0	7	6	16	40.6499	43.8217	35.5171	1.73585	1.66692	2.22572	1.87616
NM_177192	Dennd5b	371	4196	9833	3825	17.5761	18.0556	19.2715	18.3011	31	2	30	4	97	1	29	26	96	86.2507	97.2556	109.142	1.7355	1.72538	2.49707	1.98598
NM_145155	Wasf3	431	1937	2685	1506	10.8855	9.03572	10.9556	10.2923	11	2	5	2	23	0	9	3	23	67.9851	28.5016	66.4132	1.73531	0.299675	2.20654	1.41384
NM_025379	Cox7b	131	374	1001	243	21.3391	22.5127	23.217	22.3563	2	0	0	0	0	0	2	0	0	93.6311	1	1	1.73463	-4.99831	-4.42117	-2.56162
NM_009735	B2m	51	411	858	360	23.3868	22.2423	23.4876	23.0389	3	0	0	0	1	0	3	0	1	94.8015	1	12.0795	1.73462	-5.01634	-0.848952	-1.37689
NM_001163688	Ptpra	287	2669	3501	2382	21.5179	25.2543	23.6281	23.4668	26	6	24	3	61	0	20	21	61	95.5179	126.139	111.363	1.73451	1.9515	2.34206	2.00936
NM_028940	Clvs1	325	1390	3604	1065	25.5588	21.8849	24.0802	23.8413	9	0	9	1	19	0	9	8	19	96.1367	107.476	77.581	1.73439	1.71101	1.80884	1.75142
NM_008624	Mras	420	1047	4032	627	68.3642	65.8607	61.3476	65.1908	8	0	8	3	19	1	8	5	18	145.151	114.097	124.841	1.72912	1.19425	1.75041	1.55793
NM_057171	Bag6	307	3772	3858	3465	17.8361	18.576	12.9324	16.4482	26	1	27	6	101	2	25	21	99	82.0792	86.7139	124.246	1.72762	1.62385	2.7631	2.03819
NM_026556	Dynll2	298	568	2476	270	172.279	165.015	146.831	161.375	7	2	3	0	8	0	5	3	8	210.67	158.975	128.848	1.72619	1.12943	1.12491	1.32684
NM_028446	Trip11	343	6274	6448	5931	4.66407	3.65235	3.9067	4.07437	24	0	17	2	39	0	24	15	39	46.0341	36.1856	28.5949	1.72523	1.19956	1.67692	1.5339
NM_008173	Nr3c1	13	2392	6329	2379	30.7763	26.8812	32.817	30.1582	23	1	23	4	67	1	22	19	66	105.202	114.27	120.643	1.72428	1.65854	2.27179	1.88487
NM_001039079	Prkcz	555	1785	4111	1230	45.6733	40.2978	39.0583	41.6765	15	2	18	1	48	2	13	17	46	120.236	197.75	162.631	1.72414	2.25586	2.46316	2.14772
NM_016788	Tnk2	484	3652	4454	3168	50.7415	51.2792	48.3105	50.1104	39	3	34	3	117	2	36	31	115	129.275	140.007	157.857	1.71885	1.6472	2.28373	1.88326
NM_172653	Slc39a10	50	2552	4961	2502	36.6434	34.4369	39.737	36.9391	30	5	18	3	55	1	25	15	54	113.671	85.7781	93.8551	1.71507	1.1232	1.7594	1.53256
NM_001165902	Ctnnb1	87	2433	3423	2346	127.264	126.272	126.388	126.641	41	2	36	7	158	2	39	29	156	189.118	176.865	289.167	1.71499	1.42857	2.47059	1.87138
NM_172513	Fam126b	250	1843	8695	1593	32.6464	29.4899	34.2233	32.1199	15	0	9	0	26	1	15	9	25	107.12	80.835	68.2458	1.71278	1.12137	1.40321	1.41245
NM_011352	Sema7a	16	2011	3275	1995	44.7893	52.6302	44.9098	47.4431	23	1	16	3	39	1	22	13	38	125.452	93.2337	82.8309	1.70815	1.09341	1.39385	1.39847
NM_001033300	Gmps	141	2223	4567	2082	6.07264	4.97882	8.04231	6.36459	10	0	3	0	11	0	10	3	11	54.6406	20.6164	22.9754	1.7066	0.120558	1.03102	0.952725
NM_030692	Sacm1l	8	1772	3433	1764	24.9609	24.1874	27.2206	25.4563	15	0	6	1	18	0	15	5	18	96.7362	40.555	44.3737	1.70429	0.265652	0.954317	0.974752
NM_001289916	Rora	180	1584	10869	1404	2.92728	2.47494	3.94746	3.11656	5	0	2	1	7	0	5	1	7	40.5134	10.1907	21.6812	1.70069	-0.467945	1.47601	0.902919
NM_001145807	Brinp3	104	2405	2760	2301	4.31164	3.56756	3.88632	3.92184	9	0	3	0	12	0	9	3	12	44.4961	18.6542	22.6786	1.69895	0.266523	1.37074	1.11207
NM_031186	Ndst3	156	2778	5423	2622	16.8021	17.8012	17.7413	17.4482	20	1	21	1	40	0	19	20	40	82.4361	109.136	66.3405	1.69869	1.92027	1.81416	1.81104
NM_030110	Micu3	0	1572	3268	1572	42.1276	40.3182	36.8005	39.7488	18	2	21	0	27	3	16	21	24	115.788	191.135	66.3911	1.69799	2.23516	1.20568	1.71294
NM_001081557	Camta1	99	5148	8448	5049	55.2549	50.0221	61.3293	55.5354	61	2	37	5	133	1	59	32	132	132.936	90.6812	113.689	1.69786	0.958956	1.7341	1.46364
NM_001013753	Pcdh17	2532	6006	9509	3474	23.9662	20.3895	23.6198	22.6585	29	1	15	4	48	0	28	11	48	91.6905	45.3039	60.0846	1.69641	0.495202	1.47781	1.22314
NM_030563	N4bp1	239	2921	6469	2682	17.8876	17.0413	14.8224	16.5838	19	0	6	1	33	0	19	5	33	80.5919	26.6737	53.5065	1.69634	-0.0819111	1.54161	1.05201
NM_198422	Paqr3	153	1089	1375	936	2.60725	2.95302	1.77293	2.4444	3	0	0	0	1	0	3	0	1	36.4621	1	4.64596	1.69351	-3.6715	-0.566518	-0.848171
NM_024225	Snx5	145	1360	2419	1215	13.7086	13.1766	15.0493	13.9781	10	2	12	2	23	1	8	10	22	74.9049	117.76	78.7404	1.69266	2.16291	2.22555	2.02704
NM_177077	Exoc6b	108	2541	5440	2433	28.6117	27.5234	24.7961	26.977	24	3	28	3	62	1	21	25	61	98.1914	147.018	109.028	1.69124	2.08891	2.20828	1.99614
NM_133837	Cdc123	52	1063	1623	1011	4.11092	4.94103	3.20431	4.08542	5	1	5	1	6	0	4	4	6	45.0096	56.6085	25.8078	1.69114	1.84354	1.52697	1.68722
NM_001081288	Taf2	223	3820	5033	3597	7.79565	7.74486	9.49345	8.34465	20	1	14	0	45	2	19	14	43	60.091	55.6878	51.9852	1.68229	1.39175	2.00848	1.69417
NM_016759	Rundc3a	273	1614	2430	1341	59.4627	60.0288	61.1285	60.2066	19	3	19	1	50	1	16	18	49	135.734	192.051	158.898	1.67976	1.99316	2.15731	1.94341
NM_001007574	A830010M20Rik	72	3339	6756	3267	35.9948	31.7632	36.1073	34.6217	31	0	14	2	38	2	31	12	36	107.947	52.5539	47.9187	1.67915	0.455222	0.837522	0.990631
NM_019697	Kcnd2	190	2083	4546	1893	76.527	70.2264	84.6556	77.1363	28	3	15	3	53	0	25	12	53	150.24	90.6991	121.752	1.67853	0.762284	1.5897	1.3435
NM_011215	Ptprn2	145	3151	4688	3006	65.6803	69.2252	60.3552	65.0869	42	5	42	5	126	4	37	37	122	140.026	176.111	176.491	1.67821	1.82143	2.2511	1.91691
NM_001025429	Spag9	160	3667	6913	3507	39.5925	35.6232	42.6456	39.2871	38	3	51	5	122	2	35	46	120	113.535	187.67	148.798	1.6766	2.21577	2.37862	2.09033
NM_001037997	Fer	134	2606	3085	2472	1.79152	1.44779	2.37061	1.86998	8	1	1	0	6	0	7	1	6	32.2141	5.78794	10.5549	1.67449	-0.977869	0.815674	0.5041
NM_001166377	Armcx1	703	2074	2470	1371	34.2088	32.7956	37.5043	34.8362	14	1	8	1	19	0	13	7	19	107.87	73.0522	60.2653	1.67445	0.92665	1.16369	1.25493
NM_026198	Tmem167b	186	411	2864	225	30.598	31.1902	28.2592	30.0158	2	0	1	0	0	1	2	1	-1	101.122	63.5902	1	1.67003	0.815808	-4.6393	-0.717822
NM_011929	Clcn6	46	2659	5181	2613	1.6722	1.86131	1.41157	1.64836	7	0	6	0	10	0	7	6	10	30.4758	32.8537	16.6423	1.66967	1.60268	1.566	1.61278
NM_030168	Rictor	22	5149	9314	5127	14.4712	12.3264	14.7094	13.8357	34	1	27	7	110	2	33	20	108	73.2229	55.8135	91.6035	1.66601	1.09189	2.45143	1.73644
NM_001290636	Dock7	153	6540	7139	6387	1.72271	2.11864	1.79843	1.87993	21	3	11	1	32	1	18	10	31	32.0606	22.4014	21.1065	1.66444	0.971417	1.81152	1.48246
NM_177301	Hnrnpl	21	1782	2142	1761	29.3587	25.8277	26.8589	27.3484	15	0	10	1	30	0	15	9	30	96.901	73.1233	74.0821	1.664	1.07312	1.64066	1.45926
NM_001271589	Eps8	105	1791	3562	1686	1.31398	0.740949	1.68815	1.24769	4	0	3	2	13	1	4	1	12	26.9897	8.48623	30.951	1.66043	-0.183232	2.66733	1.38151
NM_145223	Alms1	115	9871	9984	9756	1.58091	1.43359	1.49757	1.50402	27	2	6	0	33	0	25	6	33	29.1517	8.79938	14.7094	1.66022	-0.242964	1.45574	0.957662
NM_001135019	Zfp266	462	2277	6274	1815	14.8406	14.966	15.1277	14.9781	12	0	11	1	19	0	12	10	19	75.2144	78.8308	45.5227	1.65742	1.54248	1.38388	1.52793
NM_133821	Phlpp1	135	5199	6104	5064	16.0288	15.5824	15.123	15.5781	37	3	46	9	142	3	34	37	139	76.3803	104.54	119.364	1.6562	1.92615	2.7455	2.10928
NM_001191004	Lsm6	215	458	3801	243	5.3184	4.54004	4.44671	4.76839	1	0	0	0	0	0	1	0	0	46.8155	1	1	1.65574	-4.07207	-3.27722	-1.89785
NM_175489	Osbpl8	459	3129	7152	2670	16.0262	15.0306	16.2019	15.7529	20	2	7	1	30	1	18	6	29	76.6933	32.1523	47.2322	1.65545	0.218404	1.39972	1.09119
NM_177261	Kndc1	491	5720	7302	5229	21.2135	17.6273	17.8499	18.8969	40	2	34	2	122	6	38	32	116	82.6725	87.5596	96.4697	1.65527	1.55466	2.29529	1.83508
NM_001081750	Zfp664	991	1777	4078	786	44.7609	43.4616	40.1315	42.7847	8	0	2	0	9	0	8	2	9	115.788	36.4066	49.7934	1.65411	-0.201282	0.736151	0.729661
NM_001159567	Meis2	245	1451	4737	1206	10.3745	11.0575	11.7335	11.0551	7	0	6	0	12	0	7	6	12	66.0309	71.183	43.2699	1.6506	1.5773	1.5355	1.5878
NM_001272064	Trim24	300	3354	6089	3054	5.29068	7.31859	6.16552	6.25826	14	0	7	2	23	0	14	5	23	52.1501	23.4247	32.7499	1.64934	0.314893	1.5549	1.17304
NM_001033351	Grin3a	688	4036	7651	3348	7.80937	5.79792	7.22211	6.94314	20	4	15	1	38	1	16	14	37	54.3664	59.8295	48.0582	1.64747	1.60546	2.0313	1.76141
NM_010162	Ext1	820	3061	3464	2241	15.7538	16.4104	15.1071	15.7571	15	0	7	0	31	2	15	7	29	76.1458	44.6919	56.274	1.64495	0.693334	1.65222	1.33017
NM_008052	Dtx1	847	2731	3715	1884	31.5501	26.6686	26.3355	28.1847	16	0	10	0	20	0	16	10	20	96.613	75.9437	46.1637	1.64175	1.10967	0.935989	1.22914
NM_177231	Arrb1	293	1550	7112	1257	33.7169	27.1188	30.278	30.3713	11	0	10	0	34	0	11	10	34	99.5529	113.825	117.624	1.64045	1.64869	2.23002	1.83972
NM_001081293	Rprd2	202	4612	8419	4410	14.4305	13.1424	14.4006	13.9912	31	3	26	3	65	2	28	23	63	72.2297	74.6211	62.1231	1.63964	1.50416	1.88288	1.67556
NM_008882	Plxna2	643	6328	11036	5685	18.4755	20.0242	18.7023	19.0673	43	2	29	4	115	2	41	25	113	82.0445	62.919	86.437	1.63892	1.07251	2.13022	1.61388
NM_001025259	Mbp	117	504	1985	387	352.377	550.302	353.693	418.791	15	5	14	2	82	2	10	12	80	293.958	443.652	898.94	1.6383	2.03837	3.22141	2.29936
NM_205783	Chrm5	48	1647	1746	1599	1.76807	2.09299	0.558484	1.47318	4	0	1	0	0	0	4	1	0	28.4582	8.94796	1	1.63783	-0.206387	-2.40759	-0.325382
NM_139294	Braf	168	2583	9728	2415	30.9353	25.9201	33.4961	30.1172	27	6	25	1	58	1	21	24	57	98.9233	142.189	102.638	1.63631	1.97472	2.03963	1.88355
NM_001025362	Klc1	176	1859	1928	1683	53.7684	34.2754	42.3156	43.4531	17	0	15	1	61	3	17	14	58	114.911	119.019	149.863	1.6339	1.49835	2.31429	1.81551
NM_001163574	Tjp1	408	5466	6874	5058	12.6253	12.7294	13.6417	12.9988	39	8	32	5	137	3	31	27	134	69.7235	76.3761	115.207	1.63255	1.5818	2.82838	2.01424
NM_008746	Ntrk3	55	2533	2978	2478	45.9625	57.9473	53.8637	52.5912	30	3	21	3	54	1	27	18	53	123.953	103.931	93.0092	1.6294	1.18836	1.48478	1.43418
NM_019426	Atf7ip	120	4041	4527	3921	13.3745	9.10384	12.7804	11.7529	24	1	13	1	41	2	23	12	39	66.7309	43.7882	43.2533	1.62933	0.839623	1.48963	1.31953
NM_001015046	Rap1gap2	212	2351	6410	2139	30.7836	28.6635	25.2018	28.2163	22	4	21	0	70	3	18	21	67	95.7322	140.469	136.212	1.62787	1.99625	2.49618	2.0401
NM_183023	Rims4	0	810	832	810	1.13706	1.46409	1.75802	1.45305	2	0	0	0	4	0	2	0	4	28.0893	1	21.4747	1.62721	-3.3597	2.02716	0.0982233
NM_178710	Sik2	198	2994	3552	2796	2.29892	1.82901	2.10469	2.07754	8	0	0	0	9	0	8	0	9	32.5499	1	13.9977	1.6267	-3.57402	1.14502	-0.267432
NM_012061	Cadps	341	4427	5478	4086	28.6586	29.8712	30.2016	29.5771	41	6	41	8	123	1	35	33	122	97.4464	115.555	129.841	1.6254	1.68634	2.39221	1.90131
NM_001081354	Mamld1	157	2569	3457	2412	11.8249	10.9233	11.9879	11.5787	14	0	2	1	18	2	14	1	16	66.0309	5.93192	28.8466	1.62302	-2.0354	0.916277	0.167966
NM_025729	Tab3	298	2449	6364	2151	6.85373	6.0453	7.43133	6.77679	10	0	2	0	10	0	10	2	10	52.8878	13.3034	20.2167	1.62215	-0.549061	0.80002	0.624369
NM_007960	Etv1	251	1685	4131	1434	18.622	17.8644	17.7823	18.0896	12	2	2	2	17	0	10	0	17	79.3318	1	51.5527	1.62179	-4.87136	1.42359	-0.608658
NM_011250	Rbl2	119	3527	4925	3408	8.33056	7.9353	7.8867	8.05085	18	1	15	2	43	2	17	13	41	56.7474	54.5778	52.3161	1.62106	1.38419	2.04418	1.68314
NM_001008422	Scaf1	176	3947	4177	3771	48.0747	48.7501	44.3551	47.06	43	4	38	2	102	2	39	36	100	117.653	136.59	115.317	1.62039	1.6492	1.87722	1.7156
NM_001284503	Cask	490	3271	8362	2781	11.5695	10.9741	11.6612	11.4016	16	0	10	0	30	0	16	10	30	65.4509	51.4484	46.9107	1.61948	1.0904	1.6292	1.44636
NM_026969	Sec31a	133	3826	4228	3693	17.4293	15.8459	17.4512	16.9088	27	2	15	6	66	1	25	9	65	77.0118	34.8687	76.5395	1.61921	0.292966	2.04373	1.31863
NM_026174	Entpd4	239	2081	3084	1842	57.6862	61.6828	59.8116	59.7269	22	1	12	3	44	0	21	9	44	129.696	69.9078	103.876	1.61888	0.539988	1.55	1.23629
NM_145436	Cdc27	231	2709	5783	2478	14.3614	15.0782	16.0186	15.1527	16	0	11	3	32	1	16	8	31	73.4539	46.1914	54.4016	1.61634	0.764392	1.63236	1.3377
NM_183225	Usp24	259	8113	10601	7854	11.357	11.7779	12.8623	11.9991	54	8	46	10	131	8	46	36	123	66.629	65.5819	68.1029	1.61477	1.40995	2.12919	1.71797
NM_026442	Cmc1	161	482	1188	321	2.55662	2.56338	2.73601	2.61867	1	0	0	0	0	0	1	0	0	35.4398	1	1	1.61142	-3.71279	-2.83348	-1.64495
NM_025344	Eif3f	17	1103	1507	1086	18.7998	14.2801	12.6176	15.2325	8	1	8	0	12	0	7	8	12	73.3271	105.398	48.0511	1.61072	1.9514	1.44939	1.6705
NM_001159964	Eps15	130	1882	4234	1752	54.4835	53.608	54.0834	54.0583	22	3	26	2	81	3	19	24	78	123.372	195.997	193.603	1.60621	2.08707	2.52207	2.07178
NM_001081340	Setd2	82	7696	8350	7614	16.452	16.1079	18.1982	16.9194	57	6	35	4	124	3	51	31	121	76.1998	58.2534	69.1073	1.60355	1.033	1.8959	1.51082
NM_013686	Tcp1	237	1908	2499	1671	14.246	13.9328	10.4704	12.8831	10	0	6	1	10	0	10	5	10	68.08	42.8121	26.0241	1.60347	0.752059	0.688692	1.01474
NM_145979	Chd4	177	5925	6438	5748	21.4308	21.4278	19.9173	20.9253	45	3	35	2	117	1	42	33	116	83.1245	82.1428	87.7592	1.60235	1.40141	2.08328	1.69568
NM_001290345	Map4k3	136	2821	4156	2685	27.1719	25.9393	29.7586	27.6233	23	1	15	2	51	0	22	13	51	93.2126	69.2742	82.5995	1.60205	0.989117	1.79026	1.46048
NM_026604	Fam135a	412	4933	6467	4521	8.72329	7.64425	9.87628	8.74794	25	2	15	1	48	1	23	14	47	57.8748	44.3064	45.208	1.59994	1.03361	1.77202	1.46852
NM_134063	Fam208b	560	7709	8338	7149	6.68223	6.22111	7.85501	6.91945	34	1	26	3	70	2	33	23	68	52.5128	46.0315	41.3633	1.59946	1.22928	1.8174	1.54871
NM_001004761	Gpr158	689	4292	7143	3603	28.8166	27.8254	30.1921	28.9447	34	4	27	3	70	1	30	24	69	94.7225	95.3058	83.2792	1.59738	1.42135	1.76749	1.59541
NM_011286	Rph3a	435	2481	4150	2046	52.4548	55.0356	53.9249	53.8051	23	1	29	4	99	2	22	25	97	122.324	174.826	206.166	1.59671	1.92498	2.61625	2.04598
NM_133500	Ntng2	59	1652	1747	1593	24.1689	18.5937	25.5825	22.7817	13	1	14	1	39	1	12	13	38	85.6962	116.762	103.734	1.59564	1.85781	2.26161	1.90502
NM_001284373	Atf2	360	1530	3943	1170	32.9711	26.5167	33.5095	30.9991	12	2	8	1	19	0	10	7	19	97.2323	85.6022	70.6186	1.59423	1.22533	1.47881	1.43279
NM_172015	Iars	81	3870	4396	3789	5.26682	5.35722	6.28485	5.6363	17	1	14	2	30	1	16	12	29	48.0387	45.3137	33.2832	1.59327	1.32956	1.6557	1.52617
NM_019883	Uba52	41	428	494	387	144.032	125.963	123.699	131.231	6	0	3	0	19	0	6	3	19	176.375	110.913	213.498	1.59312	0.734004	2.00655	1.44456
NM_001166398	Armcx2	873	3228	3614	2355	36.2619	33.818	33.4571	34.5123	25	4	15	2	62	2	21	13	60	101.444	78.9814	110.793	1.5914	1.04484	2.04907	1.56177
NM_001160017	Gnb1	260	1283	3091	1023	138.807	129.096	136.545	134.816	20	4	28	4	87	2	16	24	85	177.927	335.667	361.322	1.58969	2.31545	2.74566	2.21693
NM_021531	Carm1	114	1941	3220	1827	14.0251	13.3665	12.8198	13.4038	11	0	3	2	29	0	11	1	29	68.4937	7.8313	69.0257	1.58859	-1.72239	2.06664	0.64428
NM_175537	Zbtb38	484	4078	4091	3594	11.7815	10.2974	11.2424	11.1071	25	5	22	5	66	2	20	17	64	63.3065	67.6774	77.4379	1.58702	1.50163	2.3717	1.82012
NM_021356	Gab1	876	2964	4859	2088	1.74203	1.08634	1.50511	1.44449	5	0	1	2	15	0	5	-1	15	27.2418	1	31.2401	1.58653	-3.35616	2.5723	0.267558
NM_013720	Mga	186	9315	13931	9129	11.3836	10.2596	12.0393	11.2275	57	6	58	9	144	6	51	49	138	63.5541	76.7972	65.7366	1.58622	1.67755	2.12738	1.79705
NM_001198912	Arhgef2	224	3101	4290	2877	57.0917	58.5162	49.8164	55.1414	33	2	13	6	62	3	31	7	59	122.58	34.8121	89.1792	1.58509	-0.417988	1.38906	0.852053
NM_010890	Nedd4	210	2874	5494	2664	94.9786	80.0588	92.5594	89.1989	46	11	43	8	168	7	35	35	161	149.462	187.978	262.811	1.58442	1.72659	2.5922	1.96774
NM_194341	Synrg	45	3462	7112	3417	13.925	11.2186	12.7054	12.6163	22	2	19	4	67	0	20	15	67	66.5858	62.8086	85.2671	1.58392	1.31754	2.41632	1.7726
NM_001193266	Mdga2	1507	4378	9834	2871	8.80486	9.8372	10.1471	9.59639	16	1	9	1	24	0	15	8	24	59.4367	39.8684	36.3521	1.58317	0.825848	1.38894	1.26599
NM_011436	Sorl1	176	6824	6938	6648	7.79379	6.17429	6.2309	6.733	35	5	36	2	105	1	30	34	104	51.3365	73.1746	68.029	1.58306	1.91438	2.55542	2.01762
NM_001290313	Wnk2	569	7019	7197	6450	18.7833	16.6574	16.5974	17.346	43	0	32	4	103	1	43	28	102	75.8412	62.1113	68.7689	1.5819	1.11059	1.87038	1.52095
NM_024183	Fip1l1	198	1836	2974	1638	9.35888	6.65584	8.57951	8.19808	8	0	1	0	6	0	8	1	6	55.5613	8.73491	15.929	1.57979	-1.27013	0.315162	0.208275
NM_001085495	Arfgef2	134	5513	8777	5379	10.1999	8.48905	10.0544	9.58113	30	2	14	2	66	2	28	12	64	59.2179	31.9192	51.7404	1.5788	0.50598	1.89937	1.32805
NM_011361	Sgk1	84	1380	2456	1296	18.7123	19.1778	19.8516	19.2472	10	1	5	0	14	1	9	5	13	79.0012	55.1998	43.6204	1.57879	0.878045	1.13662	1.19782
NM_011020	Hspa4l	65	2582	3558	2517	13.5044	12.325	14.0685	13.2993	15	0	10	0	31	0	15	10	31	67.796	56.8446	53.5587	1.57848	1.142	1.70642	1.47564
NM_012024	Ppp2r5e	573	1977	4810	1404	20.5169	18.276	22.9081	20.567	10	0	7	1	20	0	10	6	20	81.0269	61.1444	61.9462	1.57578	0.985845	1.59353	1.38505
NM_030695	Lrba	285	8850	9883	8565	2.59461	2.424	2.82842	2.61567	29	3	22	3	75	1	26	19	74	34.5336	31.7394	37.5713	1.57474	1.2761	2.39892	1.74992
NM_021423	Shank3	0	5193	7131	5193	44.0378	37.367	34.801	38.7353	49	1	54	4	168	3	48	50	165	105.152	137.76	138.171	1.57438	1.77821	2.2822	1.87826
NM_001045513	Raph1	201	4002	9117	3801	12.9434	12.4591	16.3285	13.9104	24	1	11	2	59	1	23	9	58	68.8377	33.878	66.3562	1.5737	0.368396	1.98227	1.30812
NM_001014973	Snx13	208	3085	6226	2877	16.8743	17.364	17.4631	17.2338	23	4	40	3	57	2	19	37	55	75.1294	184.007	83.1332	1.57216	2.68131	2.14885	2.13411
NM_175666	Hist2h2bb	52	433	493	381	0.807972	3.08854	1.64826	1.84826	1	0	0	0	1	0	1	0	1	29.8587	1	11.4137	1.57192	-3.50392	0.937176	-0.331607
NM_028715	Fcho1	116	2738	3160	2622	5.68818	5.97496	5.60587	5.75634	13	2	9	0	21	0	11	9	21	47.7261	49.1114	34.8288	1.57128	1.43304	1.70558	1.56997
NM_011264	Rev3l	315	9684	10666	9369	8.4028	8.2609	8.6699	8.44453	52	6	38	6	108	1	46	32	107	55.8549	48.8685	49.664	1.56973	1.19616	1.93378	1.56656
NM_029751	Rpl18a	67	598	1291	531	12.1875	12.2661	11.3297	11.9278	5	2	3	2	10	2	3	1	8	64.2722	26.945	65.5159	1.56636	0.130243	2.07773	1.25811
NM_153679	Cpt1c	270	2667	2794	2397	16.8763	19.51	17.5083	17.9649	16	0	13	1	18	2	16	12	16	75.9361	71.6285	29.0271	1.5628	1.29525	0.600067	1.15271
NM_001136260	Slc4a4	66	3351	7395	3285	23.6803	21.661	21.9769	22.4394	27	3	26	4	67	1	24	22	66	83.1136	95.8208	87.3695	1.56052	1.58173	2.02514	1.72246
NM_001093750	Ptchd1	17	2684	6489	2667	6.01577	4.45837	6.43664	5.63693	11	0	3	0	11	0	11	3	11	46.9209	16.0943	17.9358	1.55923	-0.163908	0.763664	0.719662
NM_198168	Ppp2r5b	597	2091	2708	1494	33.1329	29.9507	21.8452	28.3096	13	1	8	0	24	0	12	8	24	91.3749	76.6147	69.8574	1.5587	1.11971	1.53037	1.40292
NM_001083587	Tns3	318	4641	7483	4323	3.06746	1.60072	1.82435	2.16417	12	0	14	0	60	2	12	14	58	31.5786	46.3357	58.3437	1.55864	1.93554	3.17416	2.22278
NM_011571	Tesk1	1158	3042	3620	1884	22.7362	20.302	15.9376	19.6586	14	1	13	1	42	1	13	12	41	78.498	91.1324	94.6356	1.55696	1.58867	2.23834	1.79466
NM_207221	Jmjd1c	0	7593	8382	7593	16.4842	14.6173	16.6164	15.906	53	5	40	7	110	0	48	33	110	71.9158	62.1832	62.9986	1.55689	1.16421	1.80811	1.50973
NM_015806	Mapk6	772	2935	4205	2163	5.82576	4.97291	6.57032	5.78966	11	2	12	0	28	2	9	12	26	47.335	79.3775	52.2719	1.55597	2.12225	2.28706	1.98843
NM_013647	Rps16	115	556	615	441	33.599	38.9534	42.0171	38.1898	4	0	0	0	6	0	4	0	6	103.185	1	59.1649	1.55559	-5.3193	1.06905	-0.898219
NM_001004361	Tpgs2	269	1160	4029	891	12.1234	13.4037	10.407	11.978	5	0	3	0	8	0	5	3	8	63.8394	48.1744	39.0449	1.55411	0.965972	1.32791	1.28266
NM_177006	Nwd2	1067	6296	8539	5229	7.9827	7.69142	8.8311	8.1684	25	0	26	1	64	3	25	25	61	54.3898	68.406	50.7297	1.55121	1.7013	1.98902	1.74718
NM_025757	Gid4	511	1165	4400	654	15.8314	11.5583	17.1014	14.8304	4	0	4	0	9	0	4	4	9	69.5791	87.5094	59.8434	1.55098	1.6991	1.78582	1.67863
NM_001004436	Wapl	455	4058	6351	3603	13.8923	14.417	16.019	14.7761	25	3	18	3	68	2	22	15	66	69.4632	59.5661	79.6583	1.55076	1.14635	2.20117	1.63276
NM_178681	Dgkb	436	2824	5544	2388	19.022	17.2479	19.2595	18.5098	16	0	7	1	43	1	16	6	42	76.2223	35.9492	76.4833	1.55041	0.282762	1.97569	1.26962
NM_177296	Tnpo3	122	2894	3971	2772	14.2691	17.3572	13.2192	14.9485	19	2	23	1	51	3	17	22	48	69.7673	113.554	75.3008	1.55014	2.07021	2.11142	1.91059
NM_138305	Adcy3	173	3611	4348	3438	3.58433	2.9183	4.97125	3.82463	12	0	10	0	27	1	12	10	26	39.7074	41.6166	32.8866	1.54964	1.43923	1.9255	1.63812
NM_027117	Klhdc2	314	1535	1946	1221	18.4734	14.7101	19.5423	17.5753	9	1	1	1	20	1	8	0	19	74.5368	1	67.6689	1.54904	-4.85407	1.83739	-0.489213
NM_175455	Ankrd34b	543	2070	3940	1527	2.52748	1.52007	1.69119	1.91291	6	2	0	1	8	0	4	-1	8	29.8001	1	22.7826	1.54858	-3.52453	1.90888	-0.0223537
NM_172819	Dip2b	61	4084	8127	4023	12.4984	10.9541	14.5981	12.6835	24	1	24	2	89	1	23	22	88	65.039	78.2429	95.1227	1.54685	1.63136	2.57019	1.91613
NM_026813	Ppp6r2	604	3376	3491	2772	7.70189	7.6765	4.05017	6.47618	15	3	11	4	58	0	12	7	58	49.2475	36.1308	90.9884	1.54631	0.919573	3.00375	1.82321
NM_001080925	Rapgefl1	369	2358	4163	1989	116.267	118.384	103.102	112.584	31	3	25	1	68	2	28	24	66	160.147	172.643	144.298	1.54524	1.46424	1.55485	1.52144
NM_001083967	Tcf4	239	2240	7135	2001	185.718	187.328	199.145	190.73	38	3	35	7	100	4	35	28	96	198.984	200.209	208.629	1.54422	1.36194	1.69644	1.5342
NM_001177557	Gng12	215	434	4206	219	9.22192	6.78182	6.18236	7.39537	1	0	0	0	0	0	1	0	0	51.946	1	1	1.54415	-4.33515	-3.60213	-2.13104
NM_001081034	Fbxo11	33	2826	4013	2793	32.2223	33.4657	36.9747	34.2209	28	4	30	8	77	1	24	22	76	97.7545	112.7	118.33	1.54301	1.56282	2.1503	1.75204
NM_001285917	Dapk1	274	4603	5398	4329	45.6866	46.994	45.5522	46.0776	44	2	20	4	93	0	42	16	93	110.372	52.8816	93.4215	1.5408	0.292837	1.58906	1.1409
NM_145131	Pitrm1	17	3128	3543	3111	2.62799	2.83644	4.08247	3.1823	11	1	3	0	19	0	10	3	19	36.5676	13.7973	26.5586	1.54041	-0.0433309	1.7533	1.08346
NM_001029873	Unc13a	110	5249	7960	5139	87.3849	93.0551	83.1378	87.8593	68	3	64	9	190	4	65	55	186	143.89	153.129	157.393	1.53863	1.43984	1.86376	1.61408
NM_033370	Copb1	134	2996	3315	2862	7.94558	6.82858	7.35379	7.37598	13	0	7	1	23	0	13	6	23	51.6738	29.9954	34.947	1.53813	0.573095	1.52691	1.21271
NM_001285914	Cdh8	590	2726	3166	2136	10.9459	9.71495	9.34252	10.0011	11	0	9	1	19	1	11	8	18	58.5852	53.5872	36.6457	1.53773	1.22773	1.36996	1.37847
NM_024191	Arl2bp	264	756	2095	492	54.1168	50.7792	50.5786	51.8249	6	1	6	0	11	0	5	6	11	115.612	174.485	97.2252	1.53764	1.94464	1.55961	1.68063
NM_001195633	Epg5	33	7752	9672	7719	6.6203	6.8534	5.66262	6.37877	36	3	24	3	101	2	33	21	99	48.635	38.9252	55.7732	1.53729	1.03613	2.30886	1.62743
NM_008957	Ptch1	0	4305	4305	4305	2.23222	1.81563	1.4723	1.84005	12	1	11	0	45	1	11	11	44	29.068	36.5588	44.4458	1.53585	1.6909	2.90175	2.04284
NM_001293663	Camk2d	489	2028	5593	1539	6.82816	6.58826	8.92066	7.4457	7	0	6	0	11	0	7	6	11	51.7435	55.7809	31.0818	1.53447	1.46249	1.35084	1.44927
NM_138953	Ell2	167	2087	3652	1920	6.39433	4.91985	6.7642	6.02613	8	0	7	0	14	0	8	7	14	47.4007	52.1638	31.7087	1.53411	1.49257	1.53627	1.52098
NM_001291214	Myo18a	77	5180	6333	5103	21.5424	18.3689	16.5521	18.8212	37	3	40	4	89	2	34	36	87	75.7966	100.937	74.1387	1.53239	1.76218	1.91842	1.73766
NM_025825	Appbp2	311	2069	2407	1758	5.10945	5.73551	5.40154	5.4155	7	0	1	2	17	0	7	-1	17	45.2976	1	42.0515	1.53233	-4.14836	2.02265	-0.197794
NM_020615	Atp5c1	107	1004	1166	897	17.7643	16.367	22.9979	19.0431	6	0	4	2	13	0	6	2	13	76.0948	31.9014	63.0235	1.53107	0.0933957	1.6754	1.09996
NM_146145	Jak1	316	3778	5299	3462	23.3217	20.5166	24.9958	22.9447	26	1	30	3	56	1	25	27	55	82.1503	111.586	69.0855	1.53042	1.78813	1.6699	1.66282
NM_027045	Ccser2	262	2764	7496	2502	20.4785	17.4961	21.594	19.8562	20	3	14	2	46	1	17	12	45	77.2962	68.6225	78.2126	1.52874	1.17339	1.95596	1.5527
NM_029654	Atg2b	411	6639	10173	6228	9.52461	8.75104	9.77701	9.35088	33	2	23	6	117	5	31	17	112	56.6252	39.0547	78.2025	1.52871	0.811631	2.51331	1.61788
NM_013931	Mapk8ip3	123	4137	5579	4014	95.7627	99.6723	88.644	94.693	55	3	39	12	146	7	52	27	139	147.374	96.2407	150.587	1.5285	0.724913	1.74453	1.33265
NM_145514	Wdr26	541	2467	7047	1926	28.7641	26.5767	27.5823	27.641	19	4	19	1	40	1	15	18	39	88.5995	133.718	88.0562	1.52844	1.93753	1.88208	1.78268
NM_018873	Srcin1	137	3791	6965	3654	71.1232	74.5622	67.3409	71.0088	47	5	53	7	144	1	42	46	143	130.761	180.12	170.184	1.52753	1.8017	2.13413	1.82112
NM_178740	Slitrk4	319	2833	3935	2514	15.3233	13.3111	15.1161	14.5835	15	0	10	1	29	0	15	9	29	67.8769	51.2212	50.1631	1.52525	0.936461	1.54368	1.33513
NM_008395	Itch	203	2798	5187	2595	12.7574	12.6814	15.102	13.5136	16	1	9	0	30	3	15	9	27	65.7582	49.6224	45.2458	1.52492	0.936388	1.45125	1.30419
NM_001039546	Myo6	221	4010	7868	3789	5.23353	4.82521	6.25867	5.43913	20	5	22	3	66	4	15	19	62	45.0363	71.7466	71.1572	1.52138	2.01387	2.77827	2.10451
NM_001290634	Ugp2	267	1761	2657	1494	8.15175	7.94659	8.44095	8.17976	8	1	4	0	31	0	7	4	31	53.302	38.3073	90.2324	1.52123	0.863971	2.81881	1.73467
NM_019921	Akap10	181	2170	3879	1989	7.3936	6.62079	8.5889	7.53443	11	2	9	1	24	0	9	8	24	51.4759	57.5477	52.472	1.51993	1.50037	2.09755	1.70595
NM_001003918	Usp7	57	3369	5427	3312	30.8271	31.9101	31.3239	31.3537	32	5	28	6	103	1	27	22	102	92.7406	95.0397	133.925	1.51921	1.36939	2.39369	1.76077
NM_009072	Rock2	212	4379	8012	4167	37.3	34.5757	36.37	36.0819	42	6	46	4	112	1	36	42	111	98.2823	144.211	115.838	1.51921	1.88677	2.08039	1.82879
NM_009569	Zfpm1	342	3330	3386	2988	13.2787	8.78395	12.0473	11.37	18	2	18	1	49	0	16	17	49	60.9166	81.4031	71.3127	1.51756	1.75402	2.23551	1.83569
NM_177338	Hmbox1	328	1588	2931	1260	9.25836	6.16472	10.2579	8.56033	6	0	2	0	7	0	6	2	7	54.1723	22.7108	24.159	1.51748	0.0824655	0.884052	0.828001
NM_001291228	Slit2	1885	6463	9957	4578	2.45531	2.23267	2.67682	2.45493	14	1	8	3	23	0	13	5	23	32.3046	15.6267	21.8476	1.51628	0.29186	1.66372	1.15729
NM_001039472	Kif21b	321	5196	9119	4875	13.7269	11.6215	11.7447	12.3644	27	0	21	1	49	2	27	20	47	63.0065	58.6986	41.9252	1.51624	1.232	1.40709	1.38511
NM_025650	Uqcr11	76	247	436	171	18.272	12.5723	11.5552	14.1332	1	0	0	0	3	0	1	0	3	66.5273	1	76.2916	1.51498	-4.72341	2.1718	-0.345543
NM_001291903	Adcy8	1191	4851	4949	3660	7.46517	8.45062	8.37387	8.09656	17	0	18	1	35	0	17	17	35	52.8402	66.4569	41.5852	1.51477	1.6649	1.7088	1.62949
NM_001162366	Ptk2b	37	3067	3864	3030	209.152	218.31	201.676	209.713	59	5	41	6	134	2	54	35	132	202.744	165.271	189.445	1.51467	1.02839	1.48703	1.34337
NM_001037709	Rusc2	286	4858	5301	4572	34.8379	33.7218	30.9341	33.1646	42	4	44	5	147	1	38	39	146	94.5526	122.048	138.867	1.51366	1.69658	2.4044	1.87154
NM_176841	Ccdc88a	176	5714	8862	5538	20.6705	20.412	21.5665	20.883	39	1	29	7	80	1	38	22	79	78.0597	56.8385	62.0334	1.51286	0.871352	1.58427	1.32283
NM_172626	Rbm27	181	3199	6266	3018	9.20972	8.24587	11.3862	9.61392	15	0	10	0	25	1	15	10	24	56.5416	47.4082	34.5815	1.51005	1.07464	1.31555	1.30008
NM_024288	Rmnd5a	498	1674	6165	1176	38.2823	33.7544	33.9536	35.3301	11	1	4	3	24	0	10	1	24	96.7362	12.1665	88.7474	1.50889	-1.6678	1.71164	0.517575
NM_028841	Tspan17	190	1003	1556	813	4.76793	6.26283	3.02895	4.68657	3	0	0	0	3	0	3	0	3	41.9785	1	16.0466	1.50872	-4.0617	0.739787	-0.604395
NM_009271	Src	384	2010	3887	1626	41.6059	47.6081	40.013	43.0757	15	0	9	1	29	0	15	8	29	104.946	70.395	77.5584	1.50824	0.745929	1.37046	1.20821
NM_001290700	Zfp451	237	1917	2077	1680	4.93837	5.18058	2.89514	4.33803	9	3	12	2	12	2	6	10	10	40.6292	85.1654	25.8846	1.50766	2.39683	1.48683	1.79711
NM_019445	Fmn2	221	4958	6442	4737	16.123	15.8048	16.1964	16.0414	31	2	37	8	84	1	29	29	83	69.6452	87.5925	76.1949	1.50555	1.65341	2.07621	1.74506
NM_001081111	Tmf1	101	3377	6781	3276	6.43226	6.37712	7.40574	6.73837	15	1	10	1	34	0	14	9	34	48.6161	39.3071	45.1322	1.50404	1.01734	1.96284	1.49474
NM_011062	Pdpk1	134	1814	7160	1680	36.4186	30.8358	34.5466	33.9337	15	1	17	2	40	2	14	15	38	94.8015	127.748	98.3616	1.50378	1.74869	1.88989	1.71412
NM_009208	Slc4a3	216	3900	4441	3684	20.439	22.8346	18.7001	20.6579	26	1	19	1	70	1	25	18	69	77.1999	69.9078	81.4481	1.50335	1.17643	1.98513	1.55497
NM_172965	Sap130	113	3284	4015	3171	9.12737	8.01462	8.74323	8.6284	17	2	10	0	30	0	15	10	30	53.8135	45.1207	41.1412	1.50318	1.06813	1.64621	1.40584
NM_152809	Csnk1g3	734	2009	4394	1275	23.0259	22.3858	22.9316	22.7811	9	0	5	0	14	0	9	5	14	80.3024	56.109	47.7496	1.50187	0.800564	1.1423	1.14824
NM_153521	Lrrc41	140	2564	3131	2424	17.318	16.8265	15.6238	16.5894	15	0	5	0	21	1	15	5	20	70.3971	29.5128	35.8797	1.50102	0.0638031	0.964807	0.843209
NM_027862	Atp5h	37	523	574	486	20.9054	12.5561	16.4218	16.6278	3	0	1	0	4	0	3	1	4	70.2233	29.4399	35.7911	1.49608	0.0588532	0.959532	0.838154
NM_028887	Smchd1	179	6203	7053	6024	4.24987	4.3897	3.89418	4.17792	22	1	16	3	53	2	21	13	51	39.658	30.8767	36.816	1.49518	0.955622	2.02291	1.49124
NM_012047	Brd7	237	2193	2370	1956	3.31942	2.86969	3.01723	3.06878	6	0	9	0	7	2	6	9	5	34.8962	65.8334	11.1161	1.49457	2.23288	0.523664	1.41704
NM_001145192	Akain1	200	410	2296	210	9.62863	8.44443	8.70636	8.92647	1	0	0	0	0	0	1	0	0	54.1723	1	1	1.49252	-4.44795	-3.74145	-2.23229
NM_016920	Atp6v0a1	177	2694	4008	2517	127.037	135.828	122.457	128.441	40	4	27	11	80	4	36	16	76	162.711	90.9514	131.305	1.48959	0.460626	1.32116	1.09046
NM_213614	2005-09-01	88	1198	2127	1110	53.8176	52.0674	52.7212	52.8688	13	2	11	4	36	0	11	7	36	112.737	90.2293	141.036	1.48942	0.981248	2.0815	1.51739
NM_146028	Stac2	480	1707	3049	1227	7.02206	6.49211	5.01042	6.17486	5	0	2	0	6	1	5	2	5	46.3577	23.3216	17.7205	1.48747	0.316572	0.678759	0.827601
NM_018884	Pdzrn3	9	3201	4106	3192	4.64444	3.3128	4.39347	4.1169	11	0	1	0	6	0	11	1	6	39.2036	4.48239	8.1741	1.48732	-1.81974	-0.137394	-0.156603
NM_001286575	Ehmt2	7	3628	3859	3621	19.1604	21.9119	19.0777	20.05	24	0	31	5	93	3	24	26	90	75.4013	102.735	108.085	1.48714	1.74974	2.41546	1.88411
NM_175180	Wdr44	412	3160	4179	2748	3.91992	4.78523	5.40563	4.70359	10	0	8	2	23	2	10	6	21	41.398	31.2397	33.2318	1.48647	0.901439	1.7874	1.39177
NM_033560	Vps37a	326	1520	6379	1194	15.892	14.4014	14.522	14.9385	7	0	3	0	7	1	7	3	6	66.6945	35.9492	21.8524	1.48556	0.411265	0.32704	0.741289
NM_175155	Sash1	212	3905	7183	3693	8.60239	6.96707	9.43482	8.33476	20	3	15	2	52	1	17	13	51	52.368	50.3659	60.0541	1.48454	1.24754	2.21752	1.64987
NM_029036	S100pbp	230	1421	1546	1191	8.4059	5.12146	6.51757	6.68165	5	0	2	0	5	0	5	2	5	47.7589	24.0265	18.2562	1.48341	0.312249	0.663322	0.819661
NM_178112	Ints8	149	3137	3434	2988	1.26146	1.12329	2.5083	1.63102	8	1	9	0	14	1	7	9	13	26.651	43.0958	18.9197	1.4825	2.00052	1.75888	1.7473
NM_027994	Cand1	347	4040	8209	3693	19.1183	16.6195	16.4518	17.3965	24	1	32	6	80	0	23	26	80	70.8508	100.732	94.2024	1.48196	1.80643	2.32223	1.87021
NM_011116	Pld3	523	1990	2288	1467	104.066	111.626	91.2748	102.322	22	3	17	3	54	0	19	14	54	147.34	136.543	160.072	1.48196	1.1831	1.77528	1.48012
NM_008136	Gnl1	220	2044	2744	1824	26.9098	24.3787	21.2033	24.1639	13	0	6	0	22	0	13	6	22	81.0802	47.0651	52.4505	1.48064	0.511665	1.23414	1.07548
NM_001033166	2700094K13Rik	122	473	685	351	2.3987	4.29751	1.18627	2.62749	1	0	1	0	1	0	1	1	1	32.4108	40.7629	12.3892	1.48052	1.63438	0.795042	1.30332
NM_177586	Eif5a2	139	601	4992	462	7.53053	6.36471	7.8134	7.23622	2	0	2	0	1	0	2	2	1	49.2475	61.9385	9.4126	1.48016	1.63066	-0.35143	0.919796
NM_001037136	Agap1	619	3034	9422	2415	17.2541	17.1302	17.7663	17.3836	16	1	15	2	44	1	15	13	43	70.6595	77.0192	77.4288	1.47851	1.41965	2.03989	1.64602
NM_199021	Dpp10	116	2519	4630	2403	5.7104	3.92447	5.7215	5.11879	10	1	8	2	20	0	9	6	20	42.6074	35.7248	36.1933	1.47759	1.04427	1.84793	1.4566
NM_001081203	Sbno1	68	4244	10071	4176	24.7003	24.1604	25.739	24.8666	33	3	30	6	75	3	30	24	72	81.7254	82.2287	74.9762	1.47499	1.29947	1.7284	1.50095
NM_025596	Prelid1	135	789	1089	654	60.6731	69.4444	65.9626	65.3601	7	0	6	0	8	0	7	6	8	121.763	131.264	53.1941	1.4741	1.39491	0.517744	1.12892
NM_028806	Phactr3	452	2129	5100	1677	9.48963	9.65341	8.6358	9.25961	10	2	8	3	18	0	8	5	18	54.2692	42.6589	46.6757	1.47325	0.944863	1.77603	1.39805
NM_008973	Ptn	1470	1977	2021	507	4.45929	6.93141	6.19196	5.86089	2	0	0	0	2	0	2	0	2	44.8764	1	17.1543	1.47173	-4.19574	0.670546	-0.684486
NM_028059	Zfp654	107	1823	4745	1716	11.9415	9.81941	13.2892	11.6834	12	3	3	1	14	2	9	2	12	59.6653	16.6757	30.4099	1.4714	-0.549612	0.985757	0.635849
NM_001159516	Qk	488	1448	5438	960	12.1319	8.41873	13.9268	11.4925	8	3	9	1	42	1	5	8	41	59.2509	119.232	185.722	1.47117	2.29821	3.60849	2.45929
NM_001161362	Ppp2r3a	611	4064	6918	3453	9.42853	9.24419	11.5112	10.0613	22	5	15	4	75	4	17	11	71	56.0078	45.5794	89.4156	1.46925	0.990622	2.65241	1.70409
NM_008717	Zfp638	339	6120	6368	5781	20.1964	19.2244	25.317	21.5793	47	8	34	4	125	5	39	30	120	76.7464	74.249	90.2672	1.46883	1.2372	2.10115	1.60239
NM_030174	Mctp1	345	2430	4289	2085	15.591	13.3485	15.1947	14.7114	12	0	7	1	14	0	12	6	14	65.4744	41.1735	29.1994	1.46806	0.616203	0.756528	0.946929
NM_001001144	Scap	247	4078	4226	3831	20.6187	21.4021	17.8825	19.9678	26	1	32	2	92	1	25	30	91	74.2376	112.042	103.295	1.46715	1.87732	2.35311	1.8992
NM_177782	Prex1	114	5067	6530	4953	9.03563	9.06284	8.21305	8.77051	25	2	19	5	80	0	23	14	80	52.827	40.442	70.2382	1.46675	0.900401	2.40579	1.59098
NM_001081348	Hecw1	434	5249	9460	4815	14.9374	14.3359	20.2204	16.4979	31	2	22	2	89	2	29	20	87	68.5169	59.4301	78.5732	1.46526	1.07697	2.09977	1.54734
NM_011960	Parg	275	3161	4391	2886	11.6569	11.7669	11.2886	11.5708	17	2	15	1	25	2	15	14	23	59.1277	69.4072	34.6564	1.46412	1.51353	1.1815	1.38638
NM_178708	Pcid2	533	1733	2408	1200	7.31981	6.53408	6.47916	6.77768	5	0	3	2	5	0	5	1	5	47.4007	11.9232	18.1193	1.46404	-0.707167	0.641895	0.466257
NM_194462	Akap9	257	11597	12105	11340	7.14477	7.01052	7.0351	7.06346	54	6	32	7	132	3	48	25	129	48.1531	31.5427	49.4684	1.46214	0.671617	2.0603	1.39802
NM_001080706	Btaf1	309	5856	8509	5547	9.6844	10.868	9.18693	9.9131	27	0	15	0	36	0	27	15	36	55.3735	38.6906	28.2225	1.46166	0.763119	0.999712	1.07483
NM_181400	Wdr47	329	3092	4223	2763	41.6912	41.3684	37.83	40.2965	27	3	21	3	32	1	24	18	31	98.8159	93.2104	48.7902	1.46116	1.19093	0.751147	1.13441
NM_028431	Pmpcb	18	1488	1596	1470	1.34149	0.763233	1.52743	1.21072	3	0	2	0	6	0	3	2	6	23.2167	19.4664	17.7495	1.46112	1.03259	1.88739	1.46036
NM_009418	Tpp2	95	3884	4691	3789	8.24724	8.13638	8.10689	8.1635	20	3	10	3	43	3	17	7	40	51.0412	26.433	45.9078	1.45989	0.329881	1.84537	1.21171
NM_024260	Vps50	130	3025	3777	2895	10.3089	13.4379	16.8242	13.5237	17	1	6	1	20	0	16	5	20	62.8735	24.7112	30.0423	1.45976	-0.0698842	0.859911	0.749929
NM_028288	Cul4b	72	2985	5002	2913	11.4176	11.324	11.4692	11.4036	16	1	11	0	30	1	15	11	29	58.5797	54.0287	43.2921	1.45936	1.16089	1.51326	1.37784
NM_001100449	Taf4b	350	2918	5149	2568	1.00569	1.0843	1.16784	1.08594	5	0	5	0	8	0	5	5	8	22.1499	27.8578	13.5471	1.4581	1.61489	1.57812	1.55037
NM_019763	Spen	351	11283	12299	10932	18.0963	15.17	19.0017	17.4227	72	5	56	9	154	3	67	47	151	69.7223	61.5135	60.066	1.45791	1.09399	1.6719	1.40793
NM_001276360	Camsap1	344	5126	8014	4782	26.0948	24.9025	23.9296	24.9756	34	0	37	4	107	5	34	33	102	80.8846	98.7363	92.756	1.45746	1.56078	2.03217	1.68347
NM_008187	Cfap20	298	880	1295	582	23.8767	24.5349	20.707	23.0395	4	0	0	0	1	0	4	0	1	78.1868	1	7.47186	1.45662	-5.01636	-1.542	-1.70058
NM_175238	Rif1	43	7324	8502	7281	5.5226	4.1072	5.90665	5.17882	27	0	19	5	60	1	27	14	59	42.1861	27.5112	35.2381	1.4563	0.660378	1.80071	1.3058
NM_001024205	Nufip2	89	2168	10399	2079	17.4382	17.0046	20.5825	18.3418	14	1	7	0	24	0	13	7	24	71.1353	48.1744	50.2005	1.4562	0.710535	1.375	1.18058
NM_019490	Uso1	160	3040	3898	2880	14.2042	13.4114	13.7586	13.7914	19	3	12	0	56	0	16	12	56	63.201	59.6158	84.5565	1.45557	1.18889	2.33832	1.66093
NM_198250	Lrrc4b	80	2210	2726	2130	195.768	180.156	156.557	177.494	35	1	30	6	110	4	34	24	106	181.592	161.215	216.41	1.45515	1.09253	1.80252	1.45007
NM_133808	Hdlbp	307	4114	6347	3807	23.2678	21.671	23.8644	22.9344	29	3	18	3	72	2	26	15	70	77.6939	56.3743	79.9589	1.45022	0.803349	1.88111	1.37823
NM_001252520	Picalm	341	2309	4159	1968	33.258	35.7079	36.3411	35.1023	20	4	15	2	33	1	16	13	32	92.4892	94.5128	70.7093	1.44797	1.29367	1.38863	1.37676
NM_153057	Nomo1	136	3781	4259	3645	9.89045	10.5824	11.2187	10.5639	20	2	31	7	66	2	18	24	64	56.1786	94.2077	76.3544	1.44458	2.00887	2.3885	1.94732
NM_028984	Mgme1	234	1251	2836	1017	1.0183	1.25277	1.14611	1.13906	2	0	1	0	0	0	2	1	0	22.372	14.0686	1	1.44402	0.600659	-2.21715	-0.0574882
NM_008748	Dusp8	454	2446	4819	1992	63.4402	57.2745	56.7922	59.169	22	2	12	2	49	0	20	10	49	114.219	71.8263	106.969	1.44114	0.584672	1.59928	1.20836
NM_030675	Krit1	321	2532	6105	2211	6.76117	6.10224	7.13432	6.66591	9	0	10	0	16	2	9	10	14	46.3074	64.7118	27.5354	1.44029	1.74306	1.25797	1.48044
NM_031165	Hspa8	81	2022	2104	1941	633.774	593.235	597.396	608.135	59	8	53	14	183	6	51	39	177	298.91	287.483	396.551	1.44003	1.1888	1.76452	1.46445
NM_001033276	Kmt2d	229	16996	19827	16767	36.0847	34.7326	35.4595	35.4256	150	14	126	18	386	11	136	108	375	92.2741	92.1597	97.2585	1.43915	1.2518	1.84176	1.5109
NM_133766	Efr3a	196	2656	5210	2460	37.8356	39.7662	42.8289	40.1436	23	2	24	5	66	1	21	19	65	97.1137	110.507	114.903	1.43836	1.43879	1.98971	1.62229
NM_001035226	Xpo1	200	3416	4906	3216	15.3352	14.6906	19.7103	16.5787	22	3	19	4	80	1	19	15	79	67.21	66.7341	106.822	1.43456	1.24128	2.53926	1.73837
NM_001110783	Ank1	300	6024	8267	5724	1.90323	2.05058	1.94622	1.96668	15	1	12	4	31	0	14	8	31	27.8243	19.9969	23.5512	1.43309	0.78056	1.93623	1.38329
NM_146190	Tubgcp5	47	3122	3681	3075	4.93719	4.24682	5.65129	4.9451	11	0	7	1	11	2	11	6	9	40.6953	27.9176	12.7277	1.43192	0.709219	0.365734	0.835625
NM_015743	Nr4a3	591	2475	5569	1884	2.84317	1.76809	2.59727	2.40284	7	2	6	1	15	1	5	5	14	30.1915	37.9718	32.3146	1.43148	1.58564	2.24431	1.75381
NM_008284	Hras	206	776	2043	570	12.0152	13.7135	12.0915	12.6067	3	0	2	0	2	0	3	2	2	59.8746	50.2028	15.2583	1.43111	0.994806	-0.0655066	0.786803
NM_001164336	2005-03-01	325	1060	1316	735	6.77252	8.25348	5.43376	6.81992	3	0	1	0	4	0	3	1	4	46.4334	19.4664	23.666	1.43059	-0.00367272	1.02259	0.816502
NM_009094	Rps4x	91	883	972	792	17.4679	20.4691	21.0673	19.6681	5	0	4	1	17	0	5	3	17	71.8193	54.1962	93.3416	1.42839	0.838606	2.21812	1.49504
NM_028392	Ppp2r2b	231	1572	2079	1341	27.1349	29.9306	31.6595	29.575	12	2	16	2	31	0	10	14	31	84.8335	149.373	100.527	1.42546	2.05672	2.0231	1.83509
NM_009029	Rb1	150	2916	4625	2766	11.3793	11.413	12.2284	11.6736	16	2	14	1	27	0	14	13	27	57.5801	67.2456	42.4486	1.42058	1.46258	1.46755	1.45024
NM_053009	Zfp91	790	2509	5609	1719	36.8131	34.8019	39.3186	36.9778	15	1	9	2	41	1	14	7	40	92.6506	58.2632	101.19	1.41946	0.564544	1.86718	1.28373
NM_028233	Lrpprc	273	4452	4621	4179	1.61625	1.64753	2.46187	1.90855	10	0	8	2	24	0	10	6	24	27.2222	20.5424	24.9741	1.41942	0.837373	2.04308	1.43329
NM_001013385	Grm4	368	2867	3205	2499	2.74978	2.43877	3.1946	2.79439	7	0	3	0	10	0	7	3	10	31.866	17.1762	17.4014	1.41936	0.350622	1.23957	1.00318
NM_001287165	Nup98	177	3690	4064	3513	2.47486	2.84748	3.39914	2.90716	12	2	10	0	30	1	10	10	29	32.3831	40.7281	35.8981	1.41899	1.57252	2.25498	1.74883
NM_145732	Ctnna2	355	3073	3986	2718	14.4902	13.6756	15.1673	14.4444	17	2	14	0	51	4	15	14	47	62.7824	73.6972	75.1969	1.41841	1.46708	2.13483	1.67344
NM_001289682	Arhgap33	140	4058	4420	3918	25.0421	25.1019	24.1204	24.7548	28	1	23	2	74	2	27	21	72	78.3963	76.688	79.9134	1.41768	1.20153	1.82374	1.48098
NM_024473	BC005537	1724	2414	2551	690	45.1264	41.3442	44.277	43.5825	7	1	3	0	13	0	6	3	13	98.9233	62.2078	81.9305	1.416	0.560538	1.44092	1.13915
NM_177725	Lrrc8a	154	2587	4254	2433	18.0953	16.0354	14.059	16.0632	15	1	10	2	18	2	14	8	16	65.4609	47.0458	28.5976	1.41535	0.755851	0.661397	0.9442
NM_026673	Apoo	44	641	923	597	11.0587	10.9978	12.6775	11.578	3	0	0	0	0	1	3	0	-1	57.1667	1	1	1.41509	-4.60386	-3.93401	-2.37426
NM_027976	Acsl5	827	2879	3151	2052	3.99784	5.7343	3.91984	4.55066	8	1	8	2	10	0	7	6	10	38.8076	41.8356	21.1921	1.41296	1.34261	1.16284	1.30613
NM_172932	Nlgn3	317	2795	3883	2478	49.0732	47.1866	42.0213	46.0937	29	7	26	5	57	3	22	21	54	100.999	121.252	94.7641	1.41256	1.4898	1.60938	1.50392
NM_001081141	Gabbr2	289	3112	3998	2823	37.1504	33.3627	30.5282	33.6804	24	2	15	4	75	2	22	11	73	88.656	55.7512	112.451	1.41155	0.556953	2.08857	1.35236
NM_001160326	Serp2	173	371	765	198	65.6724	57.5887	66.7071	63.3227	2	0	1	0	0	0	2	1	0	114.911	72.2616	1	1.40941	0.552717	-5.19201	-1.07662
NM_001112723	Arhgef10l	166	3877	4382	3711	3.86331	4.98052	3.22664	4.02349	13	1	20	1	40	0	12	19	40	36.7863	73.2546	46.8728	1.40919	2.2246	2.39922	2.011
NM_001167918	D830031N03Rik	1204	4552	8311	3348	3.55866	3.0657	3.3634	3.32925	11	1	5	1	25	1	10	4	24	33.979	17.0941	31.1729	1.40757	0.238723	1.95099	1.19909
NM_146084	Fam13b	497	3053	3344	2556	2.85883	2.51954	2.72161	2.69999	7	0	5	0	10	1	7	5	9	31.1554	27.9886	15.312	1.40731	1.07565	1.08047	1.18781
NM_008420	Kcnb1	195	2769	11153	2574	50.0234	45.0802	47.2708	47.4581	26	3	29	5	73	3	23	24	70	101.652	133.406	118.261	1.40446	1.61012	1.90734	1.64064
NM_001081113	Ipo8	220	3253	5359	3033	11.0472	12.2176	10.7962	11.3536	15	0	7	1	33	0	15	6	33	56.262	28.3042	47.3144	1.40374	0.230817	1.64469	1.09308
NM_175930	Rapgef5	645	3090	3987	2445	13.2752	12.5774	14.7559	13.5362	16	3	11	1	53	3	13	10	50	60.4868	58.5186	88.9288	1.40338	1.17329	2.42488	1.66719
NM_007858	Diaph1	105	3873	5613	3768	3.8765	4.23185	3.6482	3.91885	12	0	9	0	40	0	12	9	40	36.2299	34.1747	46.1637	1.40291	1.1404	2.39674	1.64668
NM_009215	Sst	100	451	599	351	1.99498	1.0168	5.96897	2.99358	1	0	0	0	3	0	1	0	3	32.4108	1	37.1677	1.40276	-3.793	2.28343	-0.0356023
NM_026033	Gatad1	317	1118	2547	801	19.0603	18.8912	22.0137	19.9884	5	0	5	1	7	1	5	4	6	71.0123	71.4496	32.5739	1.40246	1.22766	0.687362	1.10583
NM_018878	Paxip1	271	3442	5850	3171	6.9878	6.92351	7.77868	7.22999	17	4	15	1	43	0	13	14	43	46.6384	63.169	58.969	1.40214	1.65956	2.2965	1.78606
NM_001302951	Tle4	86	2405	4067	2319	12.0836	11.8308	14.2259	12.7134	12	0	4	0	12	0	12	4	12	58.8677	24.6792	22.5026	1.40162	-0.0347148	0.488748	0.61855
NM_009790	Calm1	279	729	4125	450	692.612	643.537	683.012	673.054	19	7	8	0	32	0	12	8	32	303.365	254.361	309.235	1.4009	0.9514	1.33062	1.22764
NM_177341	Trpm3	75	4089	5157	4014	7.47304	6.63349	6.2083	6.77161	17	1	7	4	49	3	16	3	46	45.346	10.6934	49.8347	1.40064	-0.863673	2.10219	0.879719
NM_001008420	Cdh12	202	2587	5639	2385	4.15001	3.7983	5.44707	4.46513	8	0	4	1	12	0	8	3	12	38.1591	17.9972	21.8798	1.39996	0.137021	1.22296	0.919979
NM_133665	Mef2d	434	1958	5406	1524	10.7117	8.41223	9.58999	9.57129	8	1	6	1	30	0	7	5	30	52.2528	46.9416	85.6028	1.39889	1.06304	2.6265	1.69614
NM_172919	Zfp846	407	2033	2755	1626	7.15693	7.44284	9.96939	8.18972	7	0	2	1	5	0	7	1	5	48.9749	8.79938	13.3721	1.39836	-1.25891	0.0634903	0.0676477
NM_009124	Atxn1	908	3284	10584	2376	19.5985	20.8122	21.6815	20.6974	16	1	15	1	45	1	15	14	44	71.8193	84.3052	80.53	1.39798	1.44546	1.96736	1.6036
NM_008286	Hrh2	503	1580	1580	1077	0.882377	1.41343	0.92574	1.07385	2	0	0	1	1	0	2	-1	1	21.1257	1	4.03772	1.39647	-3.17841	-0.15996	-0.6473
NM_010754	Smad2	331	1735	8752	1404	2.96404	3.34037	2.7854	3.02993	4	0	4	0	6	1	4	4	5	32.4108	40.7629	15.4865	1.39556	1.54895	1.01146	1.31866
NM_175750	Plxna4	974	6656	12602	5682	55.3386	56.6433	56.0988	56.0269	60	6	52	5	142	3	54	47	139	108.116	118.35	106.381	1.39445	1.33786	1.63173	1.45468
NM_011986	Ncdn	426	2616	3701	2190	1123.46	1016.01	917.456	1018.97	75	6	62	5	218	1	69	57	217	358.427	372.395	430.891	1.39429	1.25274	1.50218	1.38307
NM_146193	Btbd1	40	1507	3001	1467	39.5045	39.2375	38.2333	38.9918	13	1	11	1	44	0	12	10	44	93.0567	97.5309	130.429	1.39415	1.27603	2.19412	1.62143
NM_175356	Pi4kb	383	2789	3786	2406	18.07	17.535	15.7539	17.1197	19	5	9	2	46	1	14	7	45	66.1955	41.627	81.3333	1.39348	0.541123	2.12219	1.35226
NM_001077707	Shprh	195	5220	6950	5025	9.71467	7.50736	8.60531	8.60912	24	2	13	4	44	0	22	9	44	49.8061	25.6259	38.0775	1.39287	0.253284	1.53622	1.06079
NM_133247	Usp33	213	2943	4194	2730	35.8416	38.508	38.9441	37.7646	23	1	15	1	34	1	22	14	33	91.6761	73.3733	52.5657	1.39165	0.884593	0.906726	1.06099
NM_138649	Syt17	204	1617	1617	1413	24.8494	22.4741	16.8851	21.4029	10	1	2	0	5	1	9	2	4	72.4597	20.2516	12.3103	1.39081	-0.632217	-0.76711	-0.00284029
NM_007906	Eef1a2	367	1759	2046	1392	189.674	167.1	160.771	172.515	24	3	23	5	56	1	21	18	55	171.623	185.015	171.82	1.39066	1.30824	1.49072	1.39654
NM_028385	Setd5	190	4516	6470	4326	32.045	32.1475	35.1915	33.128	34	1	23	4	58	1	33	19	57	86.7808	62.8405	57.298	1.39057	0.739559	1.12807	1.08607
NM_001031667	Gsk3a	191	1664	2259	1473	30.7696	32.6234	31.2951	31.5627	11	0	9	2	40	2	11	7	38	84.9545	67.9936	112.184	1.38874	0.882277	2.13322	1.46808
NM_001042528	Cacna1b	105	7089	9772	6984	19.4691	20.3186	19.5748	19.7875	46	3	39	2	104	2	43	37	102	70.0423	75.8001	63.5108	1.38864	1.31899	1.65812	1.45525
NM_001159633	Slc44a1	271	1852	1938	1581	0.642302	1.20471	1.59332	1.14678	3	0	6	1	13	0	3	5	13	21.5867	45.2492	35.7572	1.38844	2.28202	2.93801	2.20283
NM_008707	Nmt1	10	1501	1838	1491	25.302	21.76	25.9959	24.3527	10	0	3	2	21	2	10	1	19	76.299	9.5961	55.415	1.38832	-1.78714	1.3077	0.302962
NM_019798	Pde4a	408	2241	4145	1833	53.6713	56.253	50.8533	53.5925	17	0	13	1	36	0	17	12	36	105.507	93.668	85.4066	1.3857	1.02706	1.34779	1.25352
NM_015731	Atp9a	51	3195	3529	3144	46.4333	53.387	46.0063	48.6089	33	5	40	3	127	3	28	37	124	101.315	168.38	171.51	1.38538	1.93166	2.42593	1.91433
NM_134101	Psmd2	65	2792	2961	2727	19.8257	18.6496	14.8193	17.7649	19	3	19	0	50	0	16	19	50	66.7469	99.6876	79.7327	1.38339	1.77884	2.06613	1.74279
NM_028319	Zfp518a	521	4958	6840	4437	3.79258	3.56176	4.56193	3.97209	14	0	11	0	31	1	14	11	30	35.8951	35.4712	29.4024	1.38147	1.18604	1.73592	1.43448
NM_029348	Zbtb4	250	3199	7824	2949	26.7984	28.0113	30.7008	28.5035	21	0	18	5	47	1	21	13	46	81.0104	63.0727	67.832	1.38094	0.83501	1.48287	1.23294
NM_011083	Pik3c2a	216	5277	8042	5061	5.81992	5.6675	6.70931	6.06557	24	5	23	2	87	2	19	21	85	42.7084	59.3684	73.0355	1.37983	1.67531	2.73516	1.9301
NM_009322	Tbr1	255	2301	3977	2046	17.39	11.8433	14.4661	14.5665	12	1	4	1	27	2	11	3	25	61.1622	20.9792	53.1356	1.37567	-0.350621	1.6276	0.884216
NM_175091	Tnks	25	3988	6444	3963	9.82072	7.95509	11.3491	9.70829	20	2	23	2	77	5	18	21	72	51.6707	75.8172	79.006	1.37426	1.74618	2.50028	1.87357
NM_001081049	Kmt2a	0	11892	16439	11892	37.4608	37.8772	38.912	38.0833	100	5	73	12	144	3	95	61	141	90.8793	73.3918	51.5603	1.37405	0.879918	0.872641	1.0422
NM_011941	Mapkbp1	353	4865	6937	4512	15.6329	15.0429	16.4698	15.7152	25	0	10	1	50	1	25	9	49	63.0329	28.5395	47.2257	1.37388	0.0478775	1.4013	0.941018
NM_023912	Scyl1	71	2492	2637	2421	5.75895	6.65955	5.54672	5.9884	11	2	5	2	33	1	9	3	32	42.2906	17.7296	57.4787	1.37328	-0.0605527	2.39906	1.23726
NM_033327	Zfp423	360	4239	4907	3879	2.14101	1.59288	2.02031	1.91807	9	0	9	2	17	1	9	7	16	26.3948	25.8197	17.9371	1.37192	1.16426	1.5619	1.36603
NM_008133	Glud1	171	1848	3158	1677	29.8937	27.7401	30.26	29.2979	12	0	7	2	25	0	12	5	25	81.4038	42.6589	64.8274	1.37154	0.254362	1.39715	1.00768
NM_198107	Med16	43	2641	3218	2598	12.3008	11.1983	7.17143	10.2235	13	1	4	0	31	0	12	4	31	52.5458	22.0289	51.8888	1.36766	-0.0679485	1.85546	1.05172
NM_001122873	Ubl7	103	1246	1364	1143	8.83394	8.78166	9.2936	8.96973	5	0	1	0	4	0	5	1	4	49.7645	12.5178	15.2183	1.3672	-0.804941	0.182708	0.248322
NM_009872	Cdk5r2	69	1179	2704	1110	125.528	126.4	97.367	116.431	14	0	11	1	22	0	14	10	22	143.483	128.899	86.1889	1.36669	1.02255	0.786493	1.05858
NM_183221	Fat4	20	14966	16109	14946	10.5956	11.1221	11.1682	10.9619	76	5	50	9	163	3	71	41	160	54.0418	39.2493	46.5529	1.36658	0.723511	1.64727	1.24579
NM_001004062	Crtc1	15	1908	5674	1893	80.9613	76.8571	69.8882	75.9022	22	2	26	6	52	0	20	20	52	120.192	151.165	119.455	1.36622	1.50892	1.57416	1.4831
NM_011035	Pak1	227	1862	3061	1635	75.5246	68.3477	75.6581	73.1768	17	0	13	1	35	1	17	12	34	118.284	105.011	90.43	1.36493	1.00526	1.19964	1.18994
NM_001289654	Fhod3	986	5270	5784	4284	1.1191	0.754656	1.57349	1.14908	8	0	9	1	19	1	8	8	18	21.244	26.7186	18.2715	1.36416	1.52077	1.96789	1.61761
NM_001001735	Whsc1l1	497	2465	3652	1968	12.4751	12.7582	13.7064	12.9799	11	1	14	0	12	2	10	14	10	57.8058	101.783	22.0966	1.36299	1.99698	0.447128	1.26903
NM_001290683	Smap1	211	1279	2083	1068	8.07943	5.79918	4.75931	6.21264	4	0	5	0	7	1	4	5	6	42.6074	66.984	24.4305	1.36213	1.83507	1.1375	1.4449
NM_001159604	Pum1	120	3687	5348	3567	25.4543	26.9529	24.6452	25.6841	27	3	23	4	74	0	24	19	74	76.5428	76.2119	90.2153	1.36119	1.17045	1.97139	1.50101
NM_001163610	Nhsl2	183	3843	12971	3660	19.3699	15.4405	17.6539	17.4881	21	0	17	2	38	0	21	15	38	65.2731	58.6385	45.1496	1.36054	1.02269	1.25729	1.21351
NM_001304266	Srcap	638	10454	10904	9816	32.6447	30.7304	29.2576	30.8776	82	11	72	11	240	5	71	61	235	82.2849	88.9135	104.108	1.35576	1.28244	2.04168	1.55996
NM_170757	Ccdc186	0	2754	2754	2754	1.97068	1.87982	1.23925	1.69658	9	3	1	3	8	0	6	-2	8	24.7847	1	12.6322	1.35426	-3.45259	1.14691	-0.317138
NM_172920	Dpy19l1	10	2251	4740	2241	11.4289	11.7572	13.2689	12.1517	11	0	10	1	26	1	11	9	25	55.8402	57.461	48.5121	1.35239	1.21166	1.63046	1.39817
NM_177673	Cep104	76	2857	3277	2781	3.43388	3.00472	3.57075	3.33645	9	1	5	0	17	0	8	5	17	32.7254	25.7242	26.5827	1.35205	0.827052	1.71958	1.29956
NM_027513	Nup205	16	6043	6229	6027	2.16623	2.13482	1.6698	1.99028	16	2	9	0	37	0	14	9	37	26.4255	21.3655	26.6964	1.35156	0.868916	2.10824	1.44291
NM_001204875	Set	347	1181	2816	834	60.3472	64.1647	60.3674	61.6264	8	0	6	0	7	0	8	6	7	109.124	102.934	36.4992	1.35105	1.07941	0.0178917	0.816119
NM_025628	Cox6b1	109	370	505	261	36.4807	38.1919	32.8256	35.8327	2	0	0	0	2	0	2	0	2	87.1738	1	33.3228	1.3503	-5.28111	0.287987	-1.21427
NM_013765	Rps26	28	376	448	348	22.3394	19.4863	11.9713	17.9323	2	0	2	0	3	0	2	2	3	65.3803	82.2287	37.4881	1.34795	1.49544	0.970443	1.27128
NM_009652	Akt1	370	1813	2690	1443	30.5226	28.7172	25.5559	28.2652	10	0	8	3	36	0	10	5	36	78.837	49.5765	108.489	1.3467	0.492685	2.1666	1.33533
NM_175543	Rab11fip4	64	1972	3145	1908	18.365	18.7205	17.2595	18.115	14	3	8	2	35	1	11	6	34	65.5859	44.993	77.4911	1.34644	0.619428	2.01054	1.32547
NM_198864	Slitrk3	419	3362	3732	2943	58.7836	53.1486	55.8713	55.9345	28	1	19	2	58	0	27	17	58	104.369	82.6478	85.7017	1.34455	0.820837	1.3211	1.16216
NM_178395	Zdhhc2	228	1329	2498	1101	14.8696	16.3359	16.5251	15.9102	8	2	8	0	16	0	6	8	16	61.9955	103.962	63.1952	1.34259	1.90551	1.81241	1.68683
NM_028945	Fam208a	222	4719	7577	4497	20.6407	19.8144	25.4814	21.9788	29	1	18	3	50	1	28	15	49	70.8323	47.7244	47.3832	1.3422	0.588555	1.15774	1.0295
NM_008914	Ppp3cb	133	1711	3831	1578	149.517	127.822	137.193	138.177	24	3	31	1	56	1	21	30	55	151.394	272.011	151.568	1.34204	1.99732	1.47411	1.60449
NM_178803	Aebp2	412	1237	5932	825	21.7816	18.9946	21.1505	20.6422	5	0	1	0	11	0	5	1	11	68.9465	17.3428	57.9816	1.34068	-0.834229	1.49541	0.667286
NM_001198571	Abi2	184	1627	5875	1443	87.3445	85.4758	94.496	89.1054	19	3	20	1	45	1	16	19	44	126.139	188.391	132.598	1.34028	1.73038	1.60602	1.55889
NM_007842	Dhx9	150	4302	4613	4152	11.3118	10.4305	9.79411	10.5121	23	4	33	2	79	2	19	31	77	52.0586	106.826	80.6464	1.33762	2.19315	2.47104	2.0006
NM_133924	Snx21	45	1137	1520	1092	22.9629	23.7747	24.5917	23.7764	7	0	1	1	1	0	7	0	1	72.9242	1	3.98225	1.33733	-5.03523	-2.47319	-2.05703
NM_198625	Mtss1l	246	2394	4718	2148	11.5983	10.7577	10.5751	10.977	11	1	10	3	34	1	10	7	33	52.9617	46.6269	66.8084	1.33664	0.971183	2.16742	1.49175
NM_018872	Tmem131	182	5816	6548	5634	14.9724	14.6498	16.0583	15.2268	37	7	26	5	57	0	30	21	57	60.576	53.3304	43.9956	1.33534	0.968802	1.32246	1.20887
NM_027815	9030624J02Rik	404	3380	3577	2976	2.75613	2.72434	3.27128	2.91725	8	0	5	0	18	1	8	5	17	30.5811	24.0386	24.8409	1.33433	0.80977	1.72122	1.28844
NM_010630	Kifc2	26	2405	3143	2379	75.9939	83.9081	77.8725	79.2582	26	1	31	7	74	2	25	24	72	119.548	144.341	131.61	1.33267	1.41634	1.68193	1.47698
NM_023172	Ndufb9	28	568	651	540	32.8882	34.9282	34.2013	34.0059	4	0	2	1	8	0	4	1	8	84.268	26.4959	64.424	1.33259	-0.522046	1.27782	0.69612
NM_013771	Yme1l1	194	2342	4571	2148	19.1932	18.7208	24.7458	20.8866	15	2	10	2	39	0	13	8	39	68.8502	53.2879	78.9554	1.33164	0.778187	1.93214	1.34732
NM_144868	Pcnx3	759	6846	7264	6087	10.9055	11.4311	9.95607	10.7642	29	1	25	0	67	2	28	25	65	52.33	58.7637	46.4367	1.331	1.31668	1.65715	1.43494
NM_012002	Cops6	11	986	1094	975	9.4212	7.79419	7.27918	8.16486	4	0	1	0	5	2	4	1	3	46.6715	14.6747	13.3804	1.33067	-0.51923	0.0666292	0.29269
NM_028898	Rptor	905	4913	7022	4008	14.0042	12.4755	12.8913	13.1237	20	0	11	1	55	1	20	10	54	56.7673	35.6981	58.5892	1.33027	0.478793	1.84578	1.21828
NM_001081183	1110037F02Rik	85	5671	7115	5586	9.04151	7.50447	8.20018	8.24872	25	2	26	5	44	1	23	21	43	46.8407	53.7887	33.4749	1.3298	1.34862	1.38202	1.35348
NM_001170537	Mef2c	578	1979	6427	1401	46.3205	47.0986	52.622	48.6804	13	1	11	0	17	0	12	11	17	97.4405	112.338	52.767	1.32826	1.34691	0.724253	1.13314
NM_001081378	Kidins220	164	5546	7402	5382	54.0157	54.9926	52.8483	53.9522	57	9	53	5	178	3	48	48	175	101.46	127.606	141.399	1.32528	1.46911	2.07019	1.62153
NM_001114125	Dab2ip	115	3514	5388	3399	20.0348	18.9531	20.2093	19.7324	20	0	27	5	84	0	20	22	84	66.9384	92.607	107.468	1.32491	1.60958	2.41902	1.7845
NM_001048060	Idnk	38	293	1467	255	6.92394	6.64278	8.64108	7.4026	1	0	0	0	0	0	1	0	0	44.6125	1	1	1.324	-4.33573	-3.60285	-2.20486
NM_028198	Xpo5	66	3681	3709	3615	1.66463	1.31369	1.05162	1.34331	8	1	11	0	30	0	7	11	30	22.0286	43.5368	36.0881	1.32338	2.13154	2.83419	2.09637
NM_019411	Ppp2ca	225	1155	1930	930	132.244	127.019	137.846	132.37	15	3	5	2	19	1	12	3	18	146.789	46.1542	84.1668	1.32307	-0.536071	0.657256	0.481419
NM_011211	Ptprd	879	5406	9127	4527	34.4453	34.6671	38.4796	35.864	38	4	31	5	102	4	34	26	98	85.4407	82.1742	94.1385	1.32081	1.07898	1.78562	1.39514
NM_001081068	Ltn1	139	5443	7737	5304	9.5245	10.3124	11.742	10.5263	31	7	38	4	87	0	24	34	87	51.4759	91.7166	71.3292	1.32058	1.97234	2.29292	1.86195
NM_025943	Dzip1	678	3237	4900	2559	14.0533	14.0042	13.8307	13.9628	13	0	14	2	38	1	13	12	37	57.7922	67.094	62.8757	1.31914	1.35198	1.90176	1.52429
NM_029741	Ppfia3	376	3961	4866	3585	24.3533	23.0515	18.8704	22.0917	23	1	25	3	72	3	22	22	69	69.812	87.8023	83.6973	1.31822	1.46501	1.97475	1.58599
NM_027375	Gcc2	40	5083	6511	5043	14.6674	13.9224	14.9265	14.5054	29	3	12	2	49	2	26	10	47	58.6517	28.3716	40.5285	1.3177	0.0873854	1.23997	0.881685
NM_177594	Mtmr9	314	1952	2408	1638	7.73336	6.66054	4.65689	6.35027	9	3	9	1	19	2	6	8	17	41.671	69.8793	45.1322	1.31701	1.88298	2.00676	1.73558
NM_016846	Rgl1	101	2408	3887	2307	22.9037	22.8509	18.8985	21.551	17	3	12	1	41	0	14	11	41	69.0362	68.2209	77.2837	1.31687	1.11582	1.87808	1.43692
NM_172867	Zfp462	318	7806	10496	7488	9.8814	10.1452	9.87872	9.96844	35	2	23	1	88	1	33	22	87	50.1354	42.0368	50.5248	1.31497	0.87945	1.83574	1.34339
NM_001198866	Dctn1	89	3884	4190	3795	39.9637	38.569	34.9086	37.8138	34	5	27	9	102	3	29	18	99	86.9326	67.863	113.442	1.31423	0.771183	2.01553	1.36698
NM_010282	Ggps1	219	1122	2371	903	18.3121	16.5687	17.2732	17.3847	5	0	3	0	3	0	5	3	3	62.991	47.5342	14.4472	1.31273	0.723361	-0.382233	0.551287
NM_207692	Mapk9	273	1545	4677	1272	43.1162	38.4162	40.7948	40.7757	10	0	7	0	14	0	10	7	14	89.4353	78.7378	47.8622	1.31022	0.940406	0.71469	0.988437
NM_020508	Brd4	265	4468	5948	4203	31.7348	32.5795	32.5967	32.3036	31	1	17	1	54	1	30	16	53	81.2004	54.467	54.8363	1.3097	0.548351	1.08337	0.980476
NM_001081335	Cul9	152	7745	7844	7593	9.35015	9.51171	8.24611	9.03599	33	1	32	2	70	0	32	30	70	47.9438	56.5302	40.09	1.30904	1.36569	1.5747	1.41648
NM_026952	Cdk12	63	3840	4846	3777	4.94214	4.46175	7.21039	5.53809	18	5	13	0	42	1	13	13	41	39.1555	49.2458	47.205	1.30876	1.46015	2.17286	1.64726
NM_011625	Ppp1r13b	185	3449	4333	3264	35.1745	34.274	35.6694	35.0393	26	2	19	4	51	0	24	15	51	83.6484	65.7527	67.9472	1.30409	0.771289	1.33247	1.13595
NM_011159	Prkdc	23	12410	12674	12387	2.22752	2.38678	2.53896	2.38442	33	3	34	3	117	2	30	31	115	27.5519	35.807	40.3723	1.30407	1.50556	2.57119	1.79361
NM_030235	Avl9	217	2167	6691	1950	11.0209	11.6211	11.5374	11.3931	9	0	3	1	25	1	9	2	24	52.5054	14.6747	53.5215	1.30198	-0.718955	1.81996	0.800993
NM_028072	Sulf2	273	2901	3790	2628	10.0239	9.80282	7.16112	8.99596	12	1	10	2	40	1	11	8	39	47.6172	43.5549	64.5343	1.30182	0.992169	2.26481	1.5196
NM_144843	Mtmr6	133	1987	3837	1854	36.2696	37.0114	39.6449	37.642	16	2	10	2	32	1	14	8	31	85.9042	61.738	72.7116	1.29977	0.637447	1.37719	1.1048
NM_177124	Tnrc6b	190	5515	17125	5325	21.5156	17.9428	20.9827	20.1471	35	4	24	2	110	0	31	22	110	66.2275	59.112	89.8307	1.2971	0.949443	2.145	1.46385
NM_178398	Wipi2	175	1513	3913	1338	37.3085	39.1201	34.2232	36.8839	10	0	4	0	17	0	10	4	17	85.0237	42.7737	55.2515	1.29704	0.120205	0.996086	0.804442
NM_028291	Pan3	0	2514	4628	2514	18.86	20.8372	24.5464	21.4145	16	1	11	1	29	0	15	10	29	67.8769	56.9124	50.1631	1.29622	0.858162	1.25924	1.13788
NM_033269	Chrm3	782	2552	3168	1770	24.267	24.7367	22.1104	23.7047	11	0	7	3	17	0	11	4	17	70.6994	32.334	41.7664	1.29443	-0.0184384	0.919738	0.73191
NM_001164493	Klhl29	734	3362	7048	2628	13.0907	13.5529	14.2965	13.6467	13	0	11	3	26	0	13	8	26	56.2748	43.5549	43.0229	1.2944	0.742357	1.37132	1.13602
NM_144515	Zfp52	454	2629	3164	2175	2.89557	3.01579	4.05783	3.32306	6	0	5	0	10	0	6	5	10	31.3826	32.8915	19.9937	1.294	1.18405	1.31162	1.26322
NM_019579	Mpp5	407	2435	5515	2028	11.1771	10.3075	10.2256	10.57	9	0	4	0	8	0	9	4	8	50.486	28.2205	17.1543	1.29009	0.269413	0.23393	0.597813
NM_198114	Dagla	100	3235	5634	3135	90.8333	86.1232	79.7883	85.5816	34	1	21	2	76	2	33	19	74	119.749	86.7139	102.647	1.28934	0.635176	1.26652	1.06368
NM_144796	Susd4	135	1608	2035	1473	47.0509	47.2383	43.8441	46.0445	13	1	15	0	28	0	12	15	28	92.6776	145.701	82.6622	1.28915	1.75544	1.41306	1.48588
NM_145374	Mios	284	2912	3705	2628	7.84834	7.47969	6.57971	7.30258	10	0	5	2	16	0	10	3	16	43.2883	16.3331	26.4756	1.28864	-0.297851	1.13381	0.708201
NM_001081011	Srgap2	718	3934	8040	3216	10.6085	10.7697	14.4933	11.9572	16	1	8	1	30	0	15	7	30	53.0605	31.1426	40.5655	1.28834	0.33764	1.38432	1.00343
NM_001033253	Plekhg1	166	4339	7190	4173	6.15639	7.65208	5.28921	6.36589	15	0	15	4	37	0	15	11	37	40.8921	37.7152	38.5571	1.28832	0.991789	1.77778	1.35263
NM_009438	Rpl13a	31	643	1026	612	13.7339	15.5332	11.2464	13.5045	3	0	5	2	20	0	3	3	20	55.7656	70.1362	142.112	1.28753	1.43596	3.10292	1.94214
NM_027706	Nbas	24	7095	7240	7071	2.18696	1.99094	2.06516	2.08102	19	3	17	3	56	3	16	14	53	25.7416	28.3282	32.5947	1.28716	1.24915	2.36323	1.63318
NM_001011874	Xkr4	150	2094	3634	1944	7.93317	8.96663	9.6599	8.85323	8	0	2	0	12	0	8	2	12	46.8155	14.7199	26.8433	1.28686	-0.563307	1.01115	0.578234
NM_133195	Celf4	356	1811	3947	1455	192.176	213.179	214.4	206.585	22	0	24	2	57	3	22	22	54	172.011	216.338	161.392	1.28647	1.42585	1.26695	1.32642
NM_001039184	Cep350	420	9708	13307	9288	8.32536	7.97159	8.28044	8.19246	42	5	27	3	94	4	37	24	90	45.3185	36.971	42.1378	1.28622	0.811815	1.71913	1.27239
NM_001290729	Taf1	87	5769	8033	5682	8.32437	8.833	8.41626	8.52455	26	3	16	4	67	3	23	12	64	46.0493	30.2171	48.9813	1.28561	0.496964	1.90682	1.2298
NM_025877	Slc25a23	190	1594	3362	1404	124.345	123.249	115.049	120.881	18	1	14	3	51	1	17	11	50	137.746	112.098	154.865	1.28546	0.798584	1.60417	1.2294
NM_173368	Chd6	121	8257	10579	8136	14.694	13.2417	15.5467	14.4942	47	6	40	5	98	1	41	35	97	57.3283	61.5502	51.8456	1.28524	1.20517	1.59583	1.36208
NM_172924	Peak1	452	5660	10982	5208	9.16754	8.27276	8.00607	8.48213	22	1	29	2	56	1	21	27	55	45.8717	74.1763	45.9244	1.28301	1.79555	1.81755	1.63203
NM_153774	Ipo9	61	3184	6236	3123	27.3469	25.5403	25.0971	25.9948	22	2	26	5	52	1	20	21	51	72.8542	96.2099	71.0149	1.28276	1.49941	1.61724	1.46647
NM_029426	Brsk2	335	2297	4047	1962	47.5152	49.3128	43.4106	46.7462	17	1	15	0	40	0	16	15	40	92.7721	109.387	88.6569	1.2816	1.3328	1.50287	1.37242
NM_028136	Dhx36	49	3055	4975	3006	14.7923	14.4461	13.4915	14.2433	15	0	16	4	33	0	15	12	33	56.7673	57.1169	47.7393	1.28146	1.10779	1.48971	1.29299
NM_021516	Mark3	541	2776	3388	2235	28.5844	32.2987	26.9106	29.2646	17	2	7	1	31	1	15	6	30	76.3502	38.4102	58.3707	1.27975	0.103687	1.24664	0.876693
NM_013626	Pam	450	3387	4103	2937	31.2728	29.5648	30.143	30.3269	22	2	18	2	33	2	20	16	31	77.468	77.9451	45.8996	1.27946	1.10328	0.873477	1.08541
NM_172894	Ppp6r1	476	3047	3793	2571	17.5904	19.0549	16.3676	17.6709	16	2	15	1	68	1	14	14	67	61.9473	77.9109	113.325	1.27889	1.42643	2.57727	1.76086
NM_001252490	Osbpl1a	496	1810	2703	1314	24.3891	19.1153	26.1545	23.2196	8	0	9	0	20	0	8	9	20	69.2613	97.9986	66.189	1.27711	1.59366	1.59929	1.49002
NM_178277	Hmgxb3	474	4335	5198	3861	12.8932	12.4593	11.2244	12.1923	20	2	19	1	50	2	18	18	48	53.0358	66.703	54.0621	1.27606	1.42483	1.78426	1.49505
NM_130885	Oxr1	148	2485	4240	2337	39.4337	40.0294	44.0027	41.1553	22	4	16	1	64	0	18	15	64	87.6214	91.8343	119.089	1.27513	1.15683	2.02292	1.48496
NM_008846	Pip5k1b	150	1770	2527	1620	18.7973	19.9646	17.3002	18.6874	9	0	11	1	16	0	9	10	16	63.201	88.3197	42.9493	1.27446	1.57381	1.13611	1.32813
NM_009270	Sqle	753	2472	2748	1719	11.0708	12.3748	13.2475	12.231	8	0	1	1	9	0	8	0	9	52.9432	1	22.7676	1.27165	-4.63675	0.534284	-0.943607
NM_001081423	Ttll5	235	4222	4841	3987	2.78732	3.39695	4.19642	3.46023	11	0	8	0	26	1	11	8	25	31.3865	28.7089	27.2675	1.27007	0.963587	1.72931	1.32099
NM_013492	Clu	233	1580	1811	1347	25.5967	17.6564	23.1529	22.1353	9	1	12	2	28	0	8	10	28	67.5645	106.22	90.3945	1.26983	1.73855	2.08434	1.69758
NM_001007573	Maneal	4	1363	2727	1359	36.3894	39.867	35.3405	37.199	12	2	6	2	22	1	10	4	21	83.7099	42.1127	67.1972	1.2695	0.092639	1.27218	0.878105
NM_028451	Larp1	129	3348	6617	3219	40.4531	44.4269	42.5884	42.4895	27	2	22	2	68	1	25	20	67	88.3518	88.8959	90.5118	1.26809	1.09079	1.60343	1.32077
NM_175143	Qrich1	175	2509	3238	2334	32.0922	30.7853	31.3694	31.4156	17	1	11	0	39	0	16	11	39	77.9858	67.4317	72.6633	1.26805	0.873107	1.51011	1.21709
NM_026855	Arv1	45	846	1165	801	2.47888	2.52686	3.20853	2.73809	2	0	0	0	0	0	2	0	0	28.4049	1	1	1.26561	-3.73952	-2.8665	-1.78013
NM_023598	Arid5b	16	3583	4494	3567	5.07441	4.2917	4.33962	4.56858	12	1	12	1	34	1	11	11	33	35.0821	44.1227	40.2311	1.26501	1.41704	2.08471	1.58892
NM_001004143	Usp22	174	1752	4442	1578	74.1713	66.2718	69.9175	70.1202	16	1	15	0	35	1	15	15	34	108.139	136.006	93.6965	1.26099	1.40396	1.28242	1.31579
NM_001289658	Agbl3	684	1074	1328	390	2.88699	3.13397	2.81471	2.94522	1	0	1	0	0	0	1	1	0	29.1697	36.6866	1	1.26047	1.41395	-2.92049	-0.0820254
NM_021458	Fzd3	463	2464	12742	2001	18.6121	18.0124	19.3742	18.6663	13	2	5	1	33	1	11	4	32	62.5377	28.6013	69.5432	1.25991	-0.0521645	1.83222	1.01332
NM_001033318	Cog7	108	2421	2884	2313	8.49421	9.92574	5.86059	8.09352	9	0	4	0	15	0	9	4	15	44.2653	24.7433	28.2012	1.25954	0.23974	1.14876	0.88268
NM_001163175	Begain	50	1910	2712	1860	60.293	51.9528	53.7535	55.3331	17	1	8	2	38	0	16	6	38	97.8596	46.1542	88.8428	1.25809	-0.0131982	1.38103	0.875308
NM_008131	Glul	144	1266	2807	1122	37.0907	25.2419	43.0759	35.1362	10	2	20	5	62	3	8	15	59	81.1136	191.281	228.671	1.25805	2.3102	3.08121	2.21649
NM_018744	Sema6a	669	3765	6894	3096	2.34006	1.87	2.33382	2.18129	7	0	6	2	16	0	7	4	16	25.7213	18.4855	22.4735	1.25796	0.60509	1.79197	1.21834
NM_144908	Galnt11	177	2004	2541	1827	13.3835	13.3429	16.4374	14.3879	9	0	7	1	21	0	9	6	21	56.0403	46.9878	49.9841	1.25684	0.820101	1.54852	1.20849
NM_001110780	Syn1	129	2142	3175	2013	224.21	204.043	200.756	209.669	34	4	29	4	103	3	30	25	100	169.541	177.692	216.027	1.25677	1.13306	1.67662	1.35548
NM_001168321	Bcor	106	5230	6119	5124	4.63818	3.28469	4.32923	4.08403	16	1	9	4	24	0	15	5	24	33.3026	13.9615	20.3682	1.25675	-0.175814	1.18573	0.755556
NM_001017985	C2cd3	210	7182	7813	6972	4.12325	3.49497	4.05621	3.89148	24	4	18	5	79	1	20	13	78	32.6339	26.6783	48.6507	1.25628	0.787348	2.47763	1.50708
NM_026534	Ubxn2b	25	1021	4735	996	9.56918	7.88927	8.92395	8.79413	4	0	0	0	1	0	4	0	1	45.6875	1	4.36608	1.25566	-4.43899	-1.60405	-1.59579
NM_015794	Fbxl17	563	2669	16991	2106	8.08804	7.67105	7.37461	7.71124	9	1	9	2	25	2	8	7	23	43.2143	47.5568	47.4921	1.25371	1.21136	1.93652	1.4672
NM_009513	Nrsn1	232	823	2137	591	61.8372	50.6838	48.672	53.731	5	0	2	0	4	2	5	2	2	96.2451	48.4189	14.7161	1.2516	0.0735249	-1.19107	0.0446873
NM_001166547	Eif4enif1	228	3180	3679	2952	14.0617	12.3335	13.3408	13.2453	16	2	8	2	33	0	14	6	33	53.9521	29.0809	48.6126	1.25138	0.177487	1.56964	0.999505
NM_007488	Arnt2	153	2292	6073	2139	39.305	42.105	38.2948	39.9016	16	0	12	2	41	0	16	10	41	85.0953	66.8901	83.3536	1.25137	0.718132	1.53109	1.16686
NM_025624	Pomp	61	487	734	426	33.9856	32.7764	36.7549	34.5056	3	0	1	0	1	0	3	1	1	80.1139	33.5864	10.208	1.25096	-0.188686	-1.39088	-0.109534
NM_024452	Luzp1	397	3604	7529	3207	28.0931	24.5382	24.5214	25.7176	23	3	15	4	54	1	20	11	53	70.9459	49.0757	71.8668	1.25086	0.53466	1.64238	1.14263
NM_153078	Ehbp1	397	4018	4974	3621	8.41867	10.2857	9.96547	9.55661	16	1	16	1	24	1	15	15	23	47.1258	59.27	27.6217	1.25082	1.40039	0.995784	1.21566
NM_010657	Hivep3	914	7961	9021	7047	14.5107	13.7732	13.2595	13.8478	35	1	21	3	81	1	34	18	80	54.8872	36.5461	49.3671	1.24966	0.480468	1.55893	1.09635
NM_177324	Sbf2	159	5778	7163	5619	12.8597	12.6409	12.0931	12.5312	29	3	23	6	89	2	26	17	87	52.6394	43.2875	67.3305	1.24889	0.784591	2.08061	1.37136
NM_028151	Skiv2l2	23	3146	3309	3123	1.911	2.45416	2.16102	2.17539	8	1	7	0	22	1	7	7	21	25.499	32.07	29.2414	1.24705	1.40154	2.17377	1.60745
NM_001170567	Depdc5	166	4942	7944	4776	5.44044	5.89075	5.95329	5.76149	17	1	13	4	59	0	16	9	59	38.1111	26.9619	53.7204	1.24618	0.567366	2.33011	1.38122
NM_172610	Mpped1	166	1147	3255	981	109.495	106.562	108.046	108.034	11	0	6	0	22	1	11	6	21	127.562	87.5094	93.0897	1.24163	0.508687	0.953032	0.901115
NM_013725	Rps11	78	555	602	477	11.9929	8.59969	9.44877	10.0138	2	0	2	0	3	0	2	2	3	47.6989	59.9907	27.3498	1.24039	1.38982	0.946914	1.19237
NM_009920	Cnih2	258	741	1343	483	287.329	289.111	258.36	278.267	9	1	17	1	40	0	8	16	40	188.425	473.964	360.134	1.24039	2.37878	2.20438	1.94118
NM_001081982	Nfix	314	1640	5626	1326	118.106	105.894	108.991	110.997	17	2	11	3	50	0	15	8	50	128.69	86.3215	163.975	1.2382	0.472751	1.74978	1.15358
NM_013813	Epb41l3	112	2902	4047	2790	26.735	23.2517	24.7774	24.9214	19	2	9	0	31	1	17	9	30	69.3172	46.1542	46.7594	1.23611	0.464965	1.04559	0.915554
NM_001291017	Pdxdc1	210	2580	3821	2370	13.2916	12.9909	12.5473	12.9433	12	1	11	1	37	1	11	10	36	52.8008	60.3704	66.055	1.23402	1.24509	2.02906	1.50272
NM_022312	Tnr	609	4686	5395	4077	15.4404	11.4022	12.4412	13.0946	23	4	21	3	76	3	19	18	73	53.0163	63.169	77.8634	1.23297	1.3035	2.25773	1.59806
NM_007881	Atn1	340	3868	4396	3528	53.6649	45.0283	43.8091	47.5008	28	0	24	1	104	4	28	23	100	90.2871	93.2764	123.26	1.23288	1.09335	1.96641	1.43088
NM_153569	Gak	132	4050	4798	3918	13.1587	11.6574	13.2102	12.6754	19	1	21	5	64	1	18	16	63	52.2642	58.429	69.9242	1.23175	1.21047	2.12667	1.52296
NM_008302	Hsp90ab1	95	2270	2507	2175	468.538	449.811	382.473	433.607	51	8	44	14	133	6	43	30	127	224.908	197.349	253.919	1.2313	0.84885	1.37182	1.15066
NM_023537	Rab3b	149	809	3320	660	5.93896	3.11868	4.84619	4.63461	2	0	0	0	4	0	2	0	4	34.4733	1	26.3553	1.2312	-4.05501	1.46387	-0.453316
NM_172694	Megf9	106	1909	3062	1803	22.8955	20.4877	16.7189	20.034	11	1	6	0	26	1	10	6	25	63.0958	47.6133	60.297	1.23057	0.640728	1.57404	1.14845
NM_001034851	Fam134b	46	1489	3139	1443	14.4504	11.9005	17.1372	14.496	8	1	0	0	2	0	7	0	2	55.1859	1	6.02719	1.23022	-4.7386	-1.50893	-1.67244
NM_144920	Plekha5	66	3876	5133	3810	8.12879	9.53202	8.70693	8.78925	15	0	10	1	28	1	15	9	27	44.7881	33.7979	30.817	1.22731	0.640203	1.21568	1.02773
NM_001289653	Nell2	44	2504	3168	2460	147.818	160.788	132.713	147.107	32	1	32	4	79	4	31	28	75	143.358	162.853	132.58	1.22602	1.21969	1.23464	1.22678
NM_178164	Ptbp3	268	1840	6855	1572	12.9436	10.2324	12.4467	11.8742	7	0	7	1	7	1	7	6	6	50.6573	54.6099	16.5978	1.22562	1.15208	0.100207	0.825971
NM_020045	Nfu1	65	833	952	768	2.82429	2.13256	4.77996	3.24561	2	0	0	0	0	0	2	0	0	29.6255	1	1	1.22494	-3.84145	-2.99239	-1.86964
NM_211355	Smek1	832	3295	4555	2463	15.4238	14.3295	14.6285	14.7939	12	0	8	1	24	1	12	7	23	55.4259	40.6636	40.6083	1.22435	0.594871	1.22822	1.01582
NM_172563	Hlf	553	1441	5665	888	34.9901	27.362	35.975	32.7757	6	0	2	0	3	0	6	2	3	76.8661	32.2248	14.6913	1.22192	-0.217558	-0.827538	0.0589397
NM_001290503	Zer1	414	2715	4218	2301	87.1997	86.9502	79.6797	84.6098	23	0	18	2	43	2	23	16	41	113.712	99.4892	77.4852	1.22152	0.840299	0.869278	0.977032
NM_001290535	Ogt	68	3179	5200	3111	87.1347	88.138	96.7925	90.6884	39	7	26	4	69	3	32	22	66	117.016	101.18	92.2562	1.22148	0.823022	1.06964	1.03805
NM_010308	Gnao1	498	1563	2948	1065	129.748	141.384	140.578	137.237	15	2	13	0	34	0	13	13	34	138.864	174.649	138.829	1.22147	1.36221	1.35251	1.31206
NM_022996	Ndfip1	139	805	937	666	22.159	9.75016	5.02993	12.313	4	1	3	1	13	0	3	2	13	51.244	42.9663	84.883	1.2206	0.784377	2.42783	1.4776
NM_019472	Myo10	460	6649	8098	6189	1.0883	0.764647	1.24428	1.03241	11	1	15	4	29	0	10	11	29	18.3813	25.4299	20.3765	1.21917	1.51364	2.20447	1.64576
NM_207583	Brinp2	820	3172	4101	2352	30.4138	29.6535	25.9967	28.688	17	2	12	3	47	2	15	9	45	72.5521	54.7492	83.2006	1.218	0.626965	1.77272	1.2059
NM_026558	Fam92a	85	1153	1906	1068	9.90078	13.5276	17.3092	13.5792	5	0	1	2	6	0	5	-1	6	53.2593	1	24.4305	1.2179	-4.69943	0.558564	-0.974324
NM_009530	Atrx	253	7684	10244	7431	40.0167	36.6839	41.5816	39.4274	58	4	50	15	134	4	54	35	130	82.669	67.3897	76.076	1.21676	0.736034	1.40814	1.12031
NM_009974	Csnk2a2	373	1426	3766	1053	4.77288	4.07011	3.45234	4.09844	3	0	2	0	3	0	3	2	3	32.4108	27.1753	12.3892	1.21549	0.782912	0.465889	0.821429
NM_011789	Apc2	18	6843	9074	6825	43.02	40.0044	37.8805	40.3016	54	4	44	5	176	3	50	39	173	83.3419	81.7588	110.229	1.21539	1.00173	1.92689	1.38134
NM_145942	Hmgcs1	232	1795	3577	1563	46.9655	39.0205	49.5235	45.1698	15	3	15	5	28	0	12	10	28	87.3411	91.5406	77.9023	1.21502	1.09641	1.3417	1.21771
NM_007830	Dbi	143	407	587	264	6.1921	8.64651	9.69022	8.17628	1	0	2	1	4	0	1	1	4	43.0916	54.1962	65.8882	1.2147	1.3648	2.3655	1.64833
NM_021506	Sh3rf1	270	2946	5181	2676	15.1075	15.4587	14.5235	15.0299	14	1	15	5	42	1	13	10	41	55.2654	53.4671	66.6268	1.21073	0.980297	1.93084	1.37396
NM_176979	Topbp1	52	4600	5112	4548	2.29866	2.04529	2.289	2.21098	11	1	10	2	26	1	10	8	25	25.0136	25.1676	23.904	1.20965	1.04216	1.87099	1.37427
NM_018781	Egr3	0	1164	3872	1164	62.9078	52.3018	65.0159	60.0752	10	0	3	1	19	0	10	2	19	97.7335	24.5838	70.9826	1.20721	-0.971241	0.996368	0.410779
NM_001163774	Taok2	1097	4265	4986	3168	33.5836	35.3432	27.4776	32.1348	22	1	14	3	49	3	21	11	46	75.4103	49.6798	63.1428	1.2061	0.418771	1.29074	0.971871
NM_001081299	Cdh18	371	2744	2744	2373	1.17946	0.850849	1.48067	1.17033	4	0	5	2	9	0	4	3	9	19.176	18.0882	16.4929	1.20549	0.946996	1.80657	1.31969
NM_001242411	Srgap1	122	3311	7718	3189	2.93535	3.82734	2.46368	3.07546	8	0	9	1	10	1	8	8	9	28.5385	35.8929	12.2727	1.20311	1.35645	0.664853	1.07481
NM_133789	Strn4	464	2747	3535	2283	66.0456	66.7353	57.6976	63.4929	21	1	26	3	81	2	20	23	79	99.6599	144.143	150.478	1.20238	1.54731	2.03942	1.59637
NM_001113208	Ncam2	217	2731	3568	2514	7.21471	6.65733	7.97107	7.28104	10	1	6	0	22	0	9	6	22	40.7262	34.1475	38.0548	1.20238	0.767901	1.65941	1.2099
NM_172752	Sorbs2	349	3940	6040	3591	49.8737	49.2088	57.4735	52.1854	34	5	24	1	69	3	29	23	66	91.8711	91.64	79.9245	1.2019	1.01143	1.27178	1.1617
NM_001166138	Armc8	253	1453	3629	1200	11.2507	9.20276	11.1511	10.5348	5	0	1	1	10	0	5	0	10	47.4007	1	36.2385	1.20111	-4.54726	1.31535	-0.676933
NM_026521	Zfp706	277	508	4417	231	65.7195	60.166	60.1213	62.0023	2	0	2	0	3	0	2	2	3	98.495	123.877	56.4756	1.19958	1.34296	0.643152	1.0619
NM_030731	Trim23	1955	3620	4258	1665	7.99841	6.17452	8.12976	7.43423	6	0	3	0	11	1	6	3	10	40.9952	25.7798	26.1178	1.19947	0.349881	1.10095	0.883435
NM_198602	Cux1	250	2281	3057	2031	1.79164	1.62708	1.75437	1.72437	4	0	2	1	17	0	4	1	17	22.4051	7.0447	36.3991	1.19896	-0.645784	2.66168	1.07162
NM_011774	Slc30a4	243	1536	5482	1293	14.3234	11.5916	15.3566	13.7572	6	0	5	0	21	0	6	5	21	52.7897	55.3279	70.6272	1.19736	1.08269	2.08047	1.45351
NM_181417	Csrp2bp	529	2869	3748	2340	9.68459	8.72098	7.80507	8.73688	9	0	7	0	9	0	9	7	9	43.7545	42.8011	16.7255	1.19719	0.984498	0.338424	0.840038
NM_001285893	Vps8	332	4616	5027	4284	4.63543	4.22033	3.32991	4.06189	12	0	6	1	33	1	12	5	32	31.866	16.6991	32.4827	1.19637	0.0857573	1.86311	1.04841
NM_145959	Fam91a1	238	2752	5621	2514	12.0647	11.5036	12.3458	11.9714	16	5	17	1	47	2	11	16	45	49.7764	91.0599	77.8393	1.19546	1.88486	2.32368	1.80133
NM_177263	Zhx3	456	3312	4480	2856	13.8037	12.9607	12.8056	13.19	15	2	14	1	42	1	13	13	41	51.7823	65.1265	62.4277	1.19466	1.34317	1.9336	1.49048
NM_001081149	Kat6a	494	6506	9126	6012	12.7506	11.0787	11.4151	11.7481	29	3	23	4	81	2	26	19	79	49.1984	45.2176	57.1425	1.18983	0.886206	1.89169	1.32257
NM_009148	Exoc4	3	2931	3723	2928	11.5819	9.65204	10.1274	10.4538	12	0	9	0	40	1	12	9	39	46.6237	43.9789	57.9222	1.18187	0.916111	1.99766	1.36521
NM_001081388	Rimbp2	726	3966	7001	3240	14.1529	15.2533	12.7443	14.0502	16	1	14	2	52	2	15	12	50	52.6675	52.9918	67.1083	1.18145	1.00782	1.99113	1.39347
NM_026666	Ubn1	867	4275	6455	3408	23.1177	21.277	21.7531	22.0493	21	2	16	2	40	0	19	14	40	63.4235	58.7761	51.0401	1.18091	0.887138	1.26263	1.11022
NM_007792	Csrp2	80	662	889	582	0.784115	0.685107	2.37654	1.28192	1	0	0	0	0	0	1	0	0	19.5467	1	1	1.17881	-3.28458	-2.30463	-1.47013
NM_176976	Cep295	45	7188	7371	7143	5.28918	5.53616	4.98294	5.26943	25	3	15	2	38	2	22	13	36	35.0379	26.0397	21.9166	1.17811	0.570671	1.10276	0.950513
NM_009455	Ube2e1	191	773	1386	582	1.58068	1.09859	1.17257	1.28395	1	0	0	0	6	0	1	0	6	19.5467	1	44.8311	1.17787	-3.28553	3.18063	0.357658
NM_030266	Inpp4a	447	3267	5748	2820	37.3175	39.4702	42.2696	39.6858	26	6	24	3	85	3	20	21	82	80.6821	106.547	126.449	1.17777	1.39301	2.13635	1.56905
NM_021884	Tsg101	68	1244	1832	1176	17.9379	17.0661	18.7181	17.9074	6	0	2	0	5	0	6	2	5	58.0417	24.333	18.489	1.17702	-0.26045	-0.0482892	0.289426
NM_017374	Ppp2cb	296	1226	1836	930	42.1978	39.3656	56.2974	45.9536	8	1	3	1	16	1	7	2	15	85.6271	30.7694	70.139	1.17617	-0.486816	1.17751	0.62229
NM_019707	Cdh13	243	2388	3913	2145	1.75599	1.50462	1.45366	1.57142	4	0	1	0	2	1	4	1	1	21.2143	6.6703	2.02733	1.17554	-0.668895	-1.4358	-0.309721
NM_020494	Ddx24	94	2668	2904	2574	75.87	67.0092	66.1492	69.6761	23	0	15	2	55	0	23	13	55	101.652	72.2616	92.9192	1.17554	0.4954	1.27511	0.982015
NM_001177806	Eif2ak4	124	4735	4909	4611	2.414	2.23326	2.15191	2.26639	10	0	4	0	21	1	10	4	20	24.6718	12.4119	18.8619	1.17505	0.00747391	1.51089	0.897805
NM_001163516	Pex5l	322	2026	4769	1704	45.9178	47.509	49.3111	47.5793	13	0	13	5	40	0	13	8	40	86.7901	67.1727	102.08	1.17491	0.61872	1.69319	1.16227
NM_001111272	Stau2	179	1796	2759	1617	11.8026	9.63959	14.7851	12.0758	7	0	4	2	19	0	7	2	19	49.2475	17.6967	51.097	1.17487	-0.483686	1.70999	0.800391
NM_025808	Lztr1	57	2571	3108	2514	28.5483	33.2488	30.2762	30.6911	16	0	16	2	47	2	16	14	45	72.4021	79.6774	77.8393	1.17478	1.12784	1.62665	1.30976
NM_001044741	Cacnb3	151	1603	2568	1452	81.0853	89.849	80.943	83.9591	15	1	18	2	54	1	14	16	53	109.688	157.662	158.731	1.17413	1.50915	1.90958	1.53095
NM_021350	Chml	0	1866	6117	1866	0.952359	0.929306	1.43469	1.10545	3	0	2	0	8	1	3	2	7	18.2897	15.3353	16.3132	1.17121	0.742983	1.83299	1.24906
NM_027341	Dzip3	392	3389	5153	2997	18.1463	20.6645	21.8248	20.2119	17	1	18	4	37	2	16	14	35	60.7337	66.8365	50.7847	1.17026	1.1247	1.31981	1.20492
NM_011818	Gmcl1	214	1789	2944	1575	13.4964	12.4474	13.2488	13.0642	7	0	2	0	7	0	7	2	7	50.5608	18.1686	19.3272	1.16593	-0.49288	0.24914	0.307398
NM_025284	Tmsb10	159	294	565	135	44.8562	41.8617	48.3242	45.014	1	0	0	0	0	0	1	0	0	84.268	1	1	1.1654	-5.41786	-4.93934	-3.06393
NM_023858	Mtmr2	140	2072	3017	1932	10.3312	11.2041	11.5277	11.021	9	1	7	1	27	0	8	6	27	47.1063	44.4341	60.7726	1.16522	0.899292	2.02785	1.36412
NM_175407	Sobp	459	3054	4980	2595	65.2186	68.7537	74.6673	69.5465	23	0	21	2	49	1	23	19	48	100.829	104.758	80.4369	1.16492	1.03228	1.06837	1.08852
NM_019666	Syncrip	354	2226	2782	1872	6.53264	5.72864	5.54971	5.937	6	0	3	1	11	0	6	2	11	36.4621	15.2861	25.5528	1.16448	-0.269324	1.2359	0.710353
NM_001162974	Lrrc51	56	497	939	441	2.70432	2.59451	2.42307	2.57396	1	0	0	0	0	0	1	0	0	25.7963	1	1	1.16348	-3.70246	-2.82073	-1.78657
NM_001037846	Cnot2	154	1777	2816	1623	20.5813	22.71	24.0662	22.4525	9	0	3	0	16	0	9	3	16	63.0842	26.4469	42.8699	1.16236	-0.275857	0.997542	0.628016
NM_012042	Cul1	321	2652	3157	2331	17.9797	17.3953	20.9004	18.7585	15	3	15	0	35	0	12	15	35	58.5646	92.0707	65.2946	1.16228	1.63154	1.73763	1.51048
NM_028657	Mfsd12	28	1459	1702	1431	3.8616	5.06954	3.91497	4.28204	4	0	0	0	3	0	4	0	3	31.7992	1	9.1166	1.16188	-4.00758	-0.00907426	-0.951591
NM_173443	Vcpip1	226	3889	9749	3663	17.656	14.7439	17.9206	16.7735	19	1	18	2	51	2	18	16	49	55.9026	62.4965	58.1716	1.16184	1.13962	1.65378	1.31842
NM_019791	Maged1	212	2540	2752	2328	205.208	187.38	170.078	187.555	31	0	22	5	95	2	31	17	93	151.487	104.481	173.721	1.16077	0.43374	1.4447	1.01307
NM_172544	Nrxn3	690	3993	6518	3303	47.9732	57.1714	52.8099	52.6515	30	4	21	6	88	0	26	15	88	89.5491	64.9763	115.858	1.15967	0.510035	1.80084	1.15685
NM_145425	Wdpcp	114	2283	2443	2169	1.58973	0.997233	2.12878	1.57191	4	0	1	0	4	0	4	1	4	20.9796	6.59649	8.01959	1.1593	-0.685134	0.547912	0.340692
NM_029409	Mff	344	1220	1894	876	71.3482	77.6064	77.8271	75.5939	9	1	4	1	20	1	8	3	19	103.892	48.9993	94.3194	1.15839	-0.113936	1.23633	0.760261
NM_138301	Trpm2	317	4838	7292	4521	2.3967	2.26908	2.69676	2.45418	10	0	5	0	7	0	10	5	7	25.163	15.8237	6.7331	1.15603	0.310119	-0.0341809	0.477323
NM_025691	Srp72	23	2039	3605	2016	27.3334	27.3697	26.1473	26.9501	13	1	6	0	18	2	12	6	16	67.7153	42.5827	34.5129	1.15572	0.301856	0.549527	0.669034
NM_028705	Herc3	101	3254	4731	3153	39.8772	40.81	38.4741	39.7204	23	1	28	4	74	1	22	24	73	79.3771	108.908	100.682	1.15372	1.42411	1.80695	1.46159
NM_001285519	Nr1h2	305	1637	2006	1332	9.05973	7.18566	10.4511	8.89883	6	1	2	0	8	0	5	2	8	42.7034	21.4832	26.1178	1.15116	-0.0209527	0.967815	0.699341
NM_026055	Rpl39	95	251	434	156	27.1902	39.9959	30.3319	32.506	1	0	1	0	1	0	1	1	1	72.9242	91.7166	27.8758	1.15089	1.29641	0.102632	0.849978
NM_145711	Tox	232	1813	2852	1581	3.47422	2.13555	4.72968	3.44649	4	0	3	0	9	0	4	3	9	28.7822	27.1495	24.755	1.14748	0.885402	1.59279	1.20856
NM_001081466	Gtf2ird1	214	3295	3462	3081	0.791023	0.9676	1.78386	1.18083	5	0	2	1	9	0	5	1	9	18.4618	4.64388	12.7029	1.1454	-1.02001	1.42327	0.516224
NM_008565	Mcm4	220	2809	3589	2589	1.6648	1.47075	2.26412	1.79989	6	1	2	0	2	0	5	2	2	21.9702	11.0528	3.3593	1.14512	-0.0216861	-0.807723	0.105238
NM_024124	Hdac9	331	2098	4428	1767	10.6712	7.54219	12.5156	10.243	7	0	3	0	14	0	7	3	14	45.0669	24.2917	34.4543	1.14502	0.0719735	1.26331	0.826768
NM_174988	Cdh22	493	2935	3586	2442	2.36043	2.37781	1.49557	2.07794	5	0	5	1	21	0	5	4	21	23.2927	23.4362	37.396	1.14382	0.976531	2.56257	1.56097
NM_001290628	Vps54	360	3258	4533	2898	9.06195	9.96514	8.74798	9.25835	12	1	6	1	14	0	11	5	14	43.1808	24.6856	21.0078	1.14359	0.155769	0.624383	0.641247
NM_134071	Slf1	116	3281	3742	3165	4.25794	5.23555	4.3431	4.6122	10	1	9	1	23	0	9	8	23	32.3493	36.165	31.6013	1.14235	1.12442	1.72935	1.33204
NM_176930	Nrcam	542	4313	7572	3771	43.6759	42.3897	43.4628	43.1761	30	3	29	4	63	2	27	25	61	81.4523	94.8541	70.3436	1.14123	1.17477	1.22787	1.18129
NM_010508	Ifnar1	129	1902	7014	1773	12.643	14.2409	15.6402	14.1747	9	1	9	1	13	2	8	8	11	51.3307	64.5586	26.9796	1.1391	1.28737	0.669974	1.03215
NM_146224	Zfp280d	183	3108	4372	2925	16.8438	16.9029	15.3151	16.3539	15	1	14	0	34	0	14	14	34	54.4501	68.4817	50.5481	1.13896	1.28675	1.46988	1.29853
NM_008139	Gnaq	495	1575	5634	1080	121.906	128.158	128.048	126.037	12	0	14	1	35	0	12	13	35	126.402	172.223	140.928	1.13657	1.39306	1.43718	1.32227
NM_001289546	Amph	82	2155	3231	2073	53.3665	52.6558	50.6519	52.2247	19	3	13	2	39	3	16	11	36	87.8045	75.9217	75.5187	1.13614	0.739511	1.18942	1.02169
NM_026605	Sympk	149	4016	4121	3867	10.3666	11.2324	13.1324	11.5771	16	0	21	2	57	0	16	19	57	47.0698	70.2995	64.0991	1.13476	1.53163	2.06828	1.57822
NM_011431	Eftud2	85	3001	3330	2916	13.0235	15.1808	13.4212	13.8752	13	0	10	2	24	1	13	8	23	50.7168	39.2532	34.2998	1.13448	0.582378	1.03212	0.916325
NM_001109753	Sv2b	564	2616	5317	2052	72.0789	70.9635	71.5547	71.5324	20	2	14	5	49	0	18	9	49	99.791	62.7535	103.841	1.13321	0.276105	1.41598	0.941762
NM_001111052	Dclk1	306	1575	7016	1269	123.669	119.581	132.823	125.358	14	0	12	0	35	0	14	12	35	125.505	135.298	119.938	1.12952	1.04817	1.20852	1.12874
NM_177994	R3hdm4	46	835	1821	789	135.156	143.151	132.532	136.946	10	1	6	2	28	1	9	4	27	129.766	72.5363	148.812	1.12498	0.0957963	1.45426	0.891678
NM_026664	Vps53	131	2630	2816	2499	6.50681	6.48857	6.00212	6.3325	9	1	8	1	25	0	8	7	25	36.4183	40.0778	43.5036	1.1243	1.0826	1.95581	1.38757
NM_016782	Cntnap1	141	4299	5360	4158	34.7331	36.2671	34.2624	35.0875	29	2	34	2	78	3	27	32	75	73.8713	110.113	78.4383	1.12395	1.51433	1.5386	1.39229
NM_011908	Ubl3	809	1163	2667	354	70.925	66.4935	63.4963	66.9716	3	0	2	0	9	0	3	2	9	96.4083	80.835	110.558	1.12273	0.680883	1.55518	1.1196
NM_177093	Lrrc58	96	1197	8592	1101	15.8611	14.5436	14.0729	14.8259	5	0	2	1	16	0	5	1	16	51.6629	12.9953	63.1952	1.12163	-1.05217	1.86467	0.644709
NM_178888	Garnl3	115	3097	3387	2982	2.30801	3.44661	3.26285	3.00582	7	0	8	1	27	0	7	7	27	26.7046	33.5864	39.3738	1.12094	1.27436	2.3636	1.5863
NM_138592	Usp39	26	1721	2237	1695	8.34677	9.71084	6.32058	8.12606	6	0	2	0	6	1	6	2	5	40.2696	16.8823	12.8278	1.12066	-0.314186	0.0093097	0.271928
NM_001033225	Pnrc1	390	1284	1925	894	39.8072	33.1687	41.7061	38.2273	6	0	3	0	16	0	6	3	16	76.3502	48.0127	77.8277	1.12048	0.265453	1.46387	0.949932
NM_008650	Mut	135	2382	3675	2247	4.90461	7.12642	5.92586	5.98563	7	0	2	0	5	1	7	2	4	35.4398	12.735	7.7412	1.11859	-0.537634	-0.492989	0.0293222
NM_001081458	Ppp2r5c	120	1479	2368	1359	25.3162	28.9355	29.786	28.0125	10	2	15	4	34	1	8	11	33	66.9679	115.81	105.596	1.11666	1.7221	2.13425	1.65767
NM_028358	Ssbp1	84	543	1063	459	1.59257	2.48284	3.5164	2.5306	1	0	0	0	0	0	1	0	0	24.7847	1	1	1.1159	-3.69228	-2.80816	-1.79485
NM_026872	Ubap2	134	3533	4369	3399	8.1257	7.52787	8.77877	8.14411	12	0	16	1	34	2	12	15	32	40.163	63.1412	40.9402	1.11551	1.58755	1.68191	1.46166
NM_199009	Fam160a2	365	3293	10853	2928	12.3457	11.149	11.5753	11.69	12	0	11	2	33	3	12	9	30	46.6237	43.9789	44.5555	1.11523	0.849107	1.5364	1.16691
NM_146200	Eif3c	59	2795	2882	2736	15.9291	11.2711	14.1541	13.7848	13	1	8	2	37	1	12	6	36	49.8955	31.3767	57.2187	1.11482	0.263182	1.77525	1.05108
NM_021361	Nova1	24	1548	7000	1524	12.2771	8.96189	10.6334	10.6241	6	0	6	0	8	0	6	6	8	44.7881	56.3299	22.8274	1.11428	1.26351	0.642346	1.00671
NM_013767	Csnk1e	142	1393	2760	1251	32.9055	36.8893	33.5048	34.4332	8	0	5	0	18	1	8	5	17	72.7493	57.1854	59.094	1.11309	0.580346	1.14399	0.945808
NM_001177705	Homez	250	1807	5764	1557	4.41418	4.31471	2.65038	3.79309	4	0	2	0	2	0	4	2	2	29.2259	18.3787	5.5859	1.11242	0.265063	-0.626013	0.25049
NM_028014	Tmem94	227	4310	4996	4083	9.26859	9.30576	8.5228	9.03239	16	1	11	3	42	0	15	8	42	41.7934	28.0339	44.7323	1.11121	0.354082	1.73307	1.06612
NM_025316	Ndufb5	19	589	999	570	19.438	22.5578	22.9381	21.6446	3	0	1	0	2	0	3	1	2	59.8746	25.1014	15.2583	1.10887	-0.329223	-0.465699	0.104651
NM_177178	Lmbrd2	227	2312	3046	2085	5.16548	4.19904	5.70897	5.02449	6	0	2	1	8	0	6	1	8	32.7372	6.86225	16.6854	1.1085	-1.32475	0.744556	0.176101
NM_028493	Rhobtb3	292	2128	4937	1836	3.73157	3.70099	5.76074	4.39777	5	0	0	2	12	0	5	-2	12	30.9809	1	28.4224	1.10837	-4.02357	1.61164	-0.434521
NM_001083927	Tle3	1072	3421	5202	2349	7.25525	7.04443	8.40399	7.56789	8	0	3	0	16	0	8	3	16	38.7439	18.273	29.6202	1.10736	-0.157325	1.26931	0.739781
NM_001079849	Paip1	112	1216	4458	1104	8.7453	7.35481	10.2805	8.79353	4	0	6	2	12	0	4	4	12	41.218	51.8398	47.2676	1.10718	1.25704	1.83244	1.39889
NM_001145779	Kif2a	39	2157	3711	2118	25.9221	23.3055	28.6411	25.9562	13	1	9	1	35	2	12	8	33	64.4543	54.0426	67.7547	1.10691	0.668213	1.55054	1.10855
NM_134123	Scaf8	417	4224	4873	3807	14.7443	14.6443	14.4076	14.5987	19	2	10	1	62	2	17	9	60	50.7998	33.8246	68.5362	1.10653	0.337167	1.99315	1.14562
NM_175481	Grik4	200	3071	3488	2871	10.535	10.3314	9.41193	10.0928	12	1	15	0	43	0	11	15	43	43.5869	74.7533	65.1308	1.10565	1.70251	2.19291	1.66702
NM_008800	Pde1b	352	1960	3222	1608	65.3066	64.4283	56.3419	62.0256	14	1	6	0	18	1	13	6	17	91.9716	53.3873	45.9742	1.1005	0.128392	0.346071	0.524987
NM_023906	Asb3	185	1763	3225	1578	4.64719	3.11612	3.47715	3.74682	4	0	1	1	3	0	4	0	3	28.8369	1	8.26734	1.10041	-3.92754	-0.0512918	-0.959475
NM_009671	Ankfy1	23	3533	8034	3510	11.0998	12.2434	10.3976	11.247	14	0	7	0	31	0	14	7	31	45.3751	28.5341	38.4066	1.09911	0.248143	1.35075	0.899335
NM_080793	Setd7	266	1367	7356	1101	26.8924	21.6516	23.3306	23.9582	6	0	6	1	25	0	6	5	25	61.9955	64.9763	98.7425	1.09855	0.982047	2.15319	1.41126
NM_175551	Dido1	329	7100	8476	6771	12.7768	11.6289	12.5014	12.3024	33	5	25	4	75	3	28	21	72	47.0437	44.3751	46.2414	1.09774	0.831439	1.55218	1.16045
NM_025630	Aggf1	299	2435	3254	2136	11.5374	13.6948	13.485	12.9057	9	0	2	1	30	0	9	1	30	47.9333	6.6984	61.0761	1.09622	-1.92512	1.91815	0.363084
NM_021539	Wsb2	156	1371	2408	1215	82.7718	84.6901	80.5845	82.6821	12	1	9	0	32	0	11	9	32	102.994	105.984	114.532	1.09243	0.945345	1.45009	1.16262
NM_011669	Usp12	294	1407	4274	1113	23.9404	23.1568	23.6515	23.5829	6	0	5	0	9	0	6	5	9	61.3271	64.2758	35.164	1.09233	0.975872	0.675309	0.914502
NM_025468	Sec11c	47	626	770	579	8.083	8.4372	7.59828	8.03949	2	0	0	0	2	0	2	0	2	39.2959	1	15.0211	1.09173	-4.38521	0.244961	-1.01617
NM_144905	6330416G13Rik	213	1242	3630	1029	2.29067	1.92953	1.79084	2.00368	2	0	0	0	0	0	2	0	0	22.1111	1	1	1.0904	-3.55232	-2.6353	-1.69907
NM_133979	Ano10	134	2114	2653	1980	2.32722	1.64528	2.63412	2.20221	4	0	0	0	4	0	4	0	4	22.9822	1	8.78509	1.08983	-3.60895	0.429813	-0.696438
NM_010733	Lrrn3	842	2966	3491	2124	41.8754	47.4256	47.5313	45.6108	16	1	15	3	47	0	15	12	47	80.3402	80.835	96.2265	1.08869	0.911154	1.63927	1.21304
NM_183016	Cdc42bpb	447	5589	6718	5142	19.5741	19.3561	16.5954	18.5085	31	6	39	4	127	7	25	35	120	55.3101	97.3887	101.485	1.08779	1.7206	2.38378	1.73072
NM_181415	Atrnl1	320	4457	6586	4137	15.642	16.1991	16.6566	16.1659	22	3	24	1	47	1	19	23	46	52.2474	79.5454	48.353	1.08628	1.50975	1.41439	1.33681
NM_001135559	Sos2	251	4250	5612	3999	6.32594	6.8011	7.99273	7.03992	13	0	11	2	46	3	13	9	43	36.9818	32.2006	46.7594	1.08332	0.703396	1.98152	1.25608
NM_177049	Jph4	1116	3003	4489	1887	186.199	172.854	158.355	172.469	24	1	23	3	69	1	23	20	68	138.66	151.646	156.707	1.08313	1.02147	1.35808	1.15423
NM_007930	Enc1	438	2208	4743	1770	315.334	277.585	299.305	297.408	29	2	28	2	85	2	27	26	83	173.535	210.171	203.918	1.08196	1.16569	1.33459	1.19408
NM_010595	Kcna1	2077	3565	8970	1488	43.3245	39.1215	40.4395	40.9618	10	0	13	0	18	1	10	13	17	76.4528	125.001	49.6818	1.08122	1.60449	0.765151	1.15029
NM_173423	Fem1c	538	2392	2866	1854	6.51491	6.48163	7.99552	6.99735	6	0	5	2	13	0	6	3	13	36.8161	23.1518	30.4919	1.08046	0.231068	1.36918	0.893569
NM_026147	Rps20	169	529	3446	360	4.50809	4.53643	5.47074	4.83842	1	0	2	0	8	1	1	2	7	31.6005	79.4877	84.5565	1.08001	2.23185	3.11383	2.1419
NM_001271857	Add2	402	2580	8208	2178	112.74	108.498	109.078	110.105	23	1	18	2	46	1	22	16	45	114.911	105.108	89.8475	1.07963	0.761663	0.887831	0.909707
NM_021921	Mapk8ip2	310	2803	3539	2493	87.5814	80.1123	70.5366	79.4101	23	1	22	3	82	1	22	19	81	100.391	109.045	141.291	1.07958	1.01063	1.78291	1.29104
NM_020256	Zbtb33	292	2308	5122	2016	11.7819	9.92904	12.8187	11.5099	8	0	7	0	19	1	8	7	18	45.1436	49.6798	38.827	1.07795	1.03426	1.34935	1.15385
NM_010806	Mllt4	133	5596	7383	5463	21.0212	19.73	23.5535	21.4349	29	1	21	4	70	1	28	17	69	58.3073	44.5236	54.9249	1.07641	0.503418	1.38938	0.989735
NM_178673	Fstl5	430	2974	4802	2544	0.953935	1.14151	1.59067	1.2287	4	0	0	1	3	0	4	-1	3	17.8871	1	5.12809	1.07608	-3.25916	0.0851853	-0.699299
NM_001162465	Dtnb	258	2238	2355	1980	5.51827	6.72423	5.79685	6.01312	6	0	5	0	6	0	6	5	6	34.4733	36.1308	13.1776	1.07597	0.964047	0.271081	0.770364
NM_009783	Cacna1g	581	7469	8223	6888	18.8193	20.344	19.6651	19.6095	35	1	31	2	98	0	34	29	98	56.1542	60.2389	61.8706	1.07519	0.992901	1.62707	1.23172
NM_001033279	D17Wsu92e	208	1084	3812	876	65.3739	62.4984	60.8806	62.9177	7	0	8	0	24	0	7	8	24	90.9055	130.665	119.14	1.07516	1.41113	1.70926	1.39852
NM_178363	Ylpm1	169	6589	7034	6420	31.3938	30.8686	29.0889	30.4505	43	5	46	5	114	2	38	41	112	67.3356	91.3737	75.8638	1.07481	1.33017	1.59539	1.33346
NM_010311	Gnaz	702	1770	2435	1068	39.056	39.1866	38.7108	38.9845	7	0	3	2	17	0	7	1	17	74.563	13.3968	69.2196	1.07461	-1.58783	1.28025	0.255675
NM_134054	Sptssa	89	305	1363	216	16.8041	15.9377	17.7662	16.836	1	0	0	0	0	0	1	0	0	52.6675	1	1	1.07362	-4.82831	-4.21121	-2.6553
NM_001081286	Fat1	6	13779	14627	13773	2.82537	2.66492	2.68883	2.72638	35	5	39	6	105	4	30	33	101	24.7793	34.2814	31.8892	1.07116	1.3624	2.13167	1.52175
NM_001253836	Atp2c1	283	2293	2465	2010	2.34312	2.38847	1.84606	2.19255	6	2	5	2	6	0	4	3	6	22.6392	21.3549	12.981	1.07075	0.810177	0.996334	0.959088
NM_172703	Eif4g3	477	5214	6139	4737	45.9549	49.9035	50.8285	48.8956	39	5	45	10	130	3	34	35	127	81.6529	105.715	116.587	1.07061	1.2566	1.86469	1.3973
NM_007460	Ap3d1	220	3820	4730	3600	30.1274	29.4229	29.274	29.6081	22	1	15	4	69	2	21	11	67	66.361	43.7182	80.9327	1.0705	0.283438	1.70948	1.02114
NM_207523	Rpl23a	41	512	560	471	33.698	38.9726	37.4374	36.7027	4	1	4	1	8	2	3	3	6	72.4597	91.1324	55.3964	1.06929	1.2144	1.00351	1.09573
NM_025614	Rwdd1	178	910	1082	732	12.3328	14.1664	11.4154	12.6382	3	0	3	0	4	1	3	3	3	46.6237	58.6385	17.8222	1.06874	1.21739	0.156731	0.814289
NM_001025431	Btbd3	320	1706	4638	1386	96.1364	83.7819	101.338	93.752	16	3	18	2	62	1	13	16	61	106.703	165.169	191.389	1.06856	1.51013	2.09783	1.55884
NM_007970	Ezh1	130	2383	4207	2253	21.493	17.5175	18.929	19.3132	11	0	3	0	18	0	11	3	18	55.5428	19.0517	34.7426	1.06847	-0.658752	0.805794	0.405172
NM_025481	Smurf2	483	2730	5331	2247	8.73285	8.47345	9.78588	8.9974	9	1	6	0	20	1	8	6	19	40.5026	38.205	36.7707	1.06826	0.803001	1.45318	1.10815
NM_134027	Med1	210	1881	2822	1671	12.7389	12.9855	14.3399	13.3548	8	1	3	0	23	0	7	3	23	47.656	25.6872	59.8553	1.06746	-0.006465	1.8637	0.974898
NM_001198861	Ctbp1	412	1705	2482	1293	61.9482	55.213	59.8478	59.003	10	0	7	0	19	0	10	7	19	87.9828	77.459	63.9008	1.06631	0.695278	0.85807	0.873221
NM_134082	Farp1	375	3522	4857	3147	4.87969	5.45483	5.6214	5.31864	12	3	3	3	42	2	9	0	40	32.5343	1	55.2732	1.06561	-4.13754	2.43043	-0.213831
NM_030256	Bcl9l	214	4699	5339	4485	12.9911	12.1112	11.2932	12.1318	18	0	9	2	30	0	18	7	30	45.6569	22.331	29.0878	1.06289	-0.150895	0.893739	0.601911
NM_001081341	Scaper	177	4374	5259	4197	3.49363	3.78322	3.02849	3.43511	10	0	13	1	29	0	10	12	29	27.1055	40.9086	30.0476	1.06285	1.47886	1.87477	1.47216
NM_177387	Ust	426	1650	4284	1224	28.0221	27.0599	30.7663	28.6161	7	0	2	1	10	0	7	1	10	65.0598	11.6894	35.5279	1.06224	-1.59917	0.546939	0.00333751
NM_033569	Cnnm2	164	2792	3330	2628	13.6216	12.3153	14.4949	13.4773	11	0	3	1	12	0	11	2	12	47.6172	10.8887	19.8567	1.06084	-1.25015	0.265087	0.0252576
NM_028356	Zbtb25	128	1448	1675	1320	10.4933	9.57528	11.7402	10.6029	5	0	1	0	3	0	5	1	3	43.0916	10.8392	9.88323	1.05977	-1.11293	-0.563888	-0.205684
NM_172804	Syt16	90	1740	2705	1650	48.3923	51.0365	54.974	51.4676	12	0	7	1	21	0	12	6	21	82.7358	52.0283	55.3461	1.05906	0.203051	0.751877	0.671329
NM_001113181	Gria4	479	1781	2338	1302	2.40651	2.43138	4.72681	3.18823	3	0	2	1	7	0	3	1	7	26.2124	10.9891	23.3797	1.05898	-0.372761	1.568	0.751405
NM_009947	Cpne6	92	1766	2004	1674	67.407	79.4757	69.7436	72.2088	15	1	3	0	34	3	14	3	31	95.1413	25.6412	80.53	1.05876	-1.02077	1.04223	0.360071
NM_173431	Rpgrip1l	27	3822	6969	3795	4.6369	4.32608	4.29093	4.41797	10	0	10	1	24	1	10	9	23	29.9767	33.9315	26.3553	1.0581	1.05824	1.49931	1.20522
NM_024212	Rpl4	44	1304	1422	1260	61.8714	71.2426	58.4016	63.8386	11	1	19	4	41	2	10	15	39	90.2871	170.331	134.6	1.05665	1.78489	1.87452	1.57202
NM_008913	Ppp3ca	778	2344	4846	1566	927.817	934.747	1001.54	954.701	46	8	58	3	136	3	38	55	133	276.05	502.509	369.327	1.05638	1.72411	1.328	1.3695
NM_001166648	Zfp280c	146	2375	4023	2229	8.35424	8.251	11.4729	9.35937	9	1	3	1	5	0	8	2	5	40.8297	12.8379	9.75464	1.05635	-0.794003	-0.490418	-0.0760238
NM_198438	Ssbp3	387	1473	3114	1086	50.175	57.1768	52.7116	53.3545	11	3	16	2	27	2	8	14	25	83.8024	184.447	100.106	1.05607	2.0073	1.5802	1.54786
NM_080855	Zcchc14	32	2903	6476	2871	43.5635	41.9928	38.1703	41.2422	19	0	14	1	41	1	19	13	40	75.2864	64.7862	60.5868	1.05498	0.652217	1.04639	0.917861
NM_031404	Actl6b	80	1361	1548	1281	6.33649	8.19687	5.56427	6.69921	4	0	2	0	6	0	4	2	6	35.5228	22.3385	20.3682	1.05482	0.205578	0.819316	0.693238
NM_001290827	Cpeb3	188	2339	5908	2151	11.3101	8.50499	10.8933	10.2361	8	0	8	0	21	0	8	8	21	42.3103	53.2135	42.4551	1.05436	1.20371	1.56506	1.27438
NM_153484	Tef	111	969	4151	858	175.811	155.652	156.998	162.82	10	0	5	0	16	0	10	5	16	132.589	83.3787	81.0932	1.05286	0.193028	0.45029	0.565392
NM_008774	Pabpc1	467	2378	2820	1911	28.9566	26.7814	33.3682	29.7021	13	2	21	1	53	1	11	20	52	65.483	149.741	118.33	1.04939	2.0577	2.25515	1.78741
NM_201637	Chd8	0	7749	8190	7749	20.4576	20.7482	23.2368	21.4809	42	3	31	6	132	8	39	25	124	57.2552	46.1601	69.5869	1.04887	0.55421	1.72914	1.11074
NM_177561	Usp46	126	1227	3225	1101	26.5399	26.9749	24.6928	26.0692	8	2	5	0	20	1	6	5	19	61.9955	64.9763	75.0443	1.04821	0.931425	1.69474	1.22479
NM_023229	Fastk	88	1726	1840	1638	17.7517	22.2881	19.9615	20.0004	8	0	5	0	10	0	8	5	10	55.5613	43.6746	26.5484	1.04811	0.517164	0.391821	0.652364
NM_008832	Phka1	322	4048	6115	3726	0.871245	0.96281	2.25905	1.36437	6	0	7	2	12	2	6	5	10	18.3191	19.1999	11.671	1.04808	0.941082	1.19408	1.06108
NM_009461	Ubr1	113	5387	7765	5274	9.31703	10.1445	9.27184	9.57778	22	3	17	6	63	0	19	11	63	40.9836	29.8418	51.946	1.04802	0.409099	1.90535	1.12083
NM_054051	Pip4k2b	100	1351	5053	1251	37.5134	39.2942	38.4989	38.4355	8	0	9	0	18	0	8	9	18	72.7493	102.934	62.5701	1.04754	1.36242	1.14504	1.185
NM_011285	Rpgr	102	2343	2801	2241	6.64832	6.52332	7.19469	6.78877	7	0	3	0	7	0	7	3	7	35.5347	19.1537	13.5834	1.04739	-0.0242929	0.225003	0.416032
NM_145456	Zswim6	15	3639	5457	3624	9.92723	8.83586	9.73862	9.50057	15	2	5	0	31	0	13	5	31	40.8086	19.7403	37.1985	1.04668	-0.182238	1.42958	0.764672
NM_029436	Klhl24	242	2045	6683	1803	17.1584	15.0222	15.5394	15.9066	8	0	9	0	16	1	8	9	15	50.4767	71.4199	36.1782	1.04617	1.36399	1.00788	1.13935
NM_031179	Sf3b1	112	4027	6192	3915	47.4915	48.9517	55.249	50.5641	31	3	36	4	87	1	28	32	86	81.3622	116.947	95.5252	1.04546	1.38216	1.55239	1.32667
NM_181821	Hcfc1r1	375	738	1243	363	27.6396	27.8479	25.2342	26.9072	2	0	0	0	0	0	2	0	0	62.6787	1	1	1.04516	-5.10938	-4.55836	-2.87419
NM_011370	Cyfip1	238	4000	6471	3762	10.7262	12.926	13.2607	12.3043	17	2	15	3	47	0	15	12	47	45.3596	45.6389	54.3289	1.04505	0.871859	1.7846	1.23383
NM_001161747	Palm	164	1184	2519	1020	90.5691	85.3506	76.5174	84.1457	9	0	7	0	14	0	9	7	14	100.378	98.1907	59.6869	1.04485	0.824643	0.496845	0.78878
NM_027179	Tecr	137	1019	1129	882	48.5123	46.9338	39.4421	44.9627	6	0	2	2	14	0	6	0	14	77.389	1	69.0257	1.04323	-5.41718	1.17057	-1.06779
NM_008292	Hsd17b4	151	2359	2685	2208	4.95131	4.46115	5.26597	4.89281	6	0	3	0	6	0	6	3	6	30.9135	19.4399	11.8169	1.04164	0.193438	0.266489	0.500522
NM_001174107	Map3k9	296	3530	10619	3234	9.62159	7.22682	8.4328	8.42707	11	0	7	3	21	0	11	4	21	38.6945	17.6967	28.2378	1.04141	-0.268025	1.12074	0.631374
NM_173068	Syt7	393	2097	6834	1704	193.876	221.216	224.563	213.218	25	3	27	4	77	0	22	23	77	146.876	193.122	196.505	1.03972	1.24313	1.52754	1.27013
NM_013681	Syn2	179	1619	3858	1440	177.367	168.394	169.385	171.715	18	1	18	2	47	4	17	16	43	134.302	158.975	129.855	1.03966	1.09219	1.09015	1.074
NM_001033713	Mef2a	336	1833	5538	1497	54.0619	51.6898	58.3988	54.7168	11	0	10	1	26	0	11	9	26	83.5925	86.0188	75.5271	1.03742	0.891706	1.15507	1.02807
NM_183355	Pbx1	665	1958	7163	1293	35.9306	36.2647	36.1657	36.1204	8	0	6	1	25	0	8	5	25	70.3862	55.3279	84.08	1.03694	0.50403	1.61732	1.05276
NM_001131068	Rfesd	593	1067	2357	474	2.91523	2.28258	2.82701	2.67494	1	0	0	0	0	0	1	0	0	24.0004	1	1	1.03644	-3.72553	-2.84922	-1.84611
NM_152234	Ubqln1	217	1882	3602	1665	44.0961	40.9478	42.1863	42.4101	11	0	13	1	28	1	11	12	27	75.1579	103.119	70.5182	1.03587	1.30603	1.2447	1.19553
NM_011391	Slc16a7	437	1892	2419	1455	8.21278	7.55346	10.4136	8.7266	5	0	0	0	3	0	5	0	3	39.0934	1	8.96623	1.03539	-4.43437	-0.560178	-1.31972
NM_133752	Opa1	206	3089	5948	2883	28.4282	26.794	28.4162	27.8795	18	2	21	4	62	2	16	17	60	63.1352	84.3678	90.502	1.03447	1.26796	1.91524	1.40589
NM_024248	Cars2	94	1753	1850	1659	1.61485	2.08507	1.84481	1.84824	3	0	1	0	2	0	3	1	2	20.5717	8.62435	5.24246	1.03444	-0.395497	-0.185269	0.151223
NM_197995	Arl16	177	699	2023	522	11.1741	13.4979	9.47959	11.3839	2	0	0	0	0	0	2	0	0	43.5869	1	1	1.03389	-4.59372	-3.92149	-2.49377
NM_001302886	Prdm4	386	2777	3941	2391	9.82939	7.08329	7.7115	8.20806	9	1	7	1	23	0	8	6	23	38.0633	35.9041	41.8311	1.03338	0.768429	1.70718	1.16966
NM_001205332	Map4	186	3447	5556	3261	84.1146	79.878	77.0765	80.3564	29	1	26	4	100	2	28	22	98	97.6795	96.526	130.685	1.03301	0.827597	1.66157	1.17406
NM_023472	Ankra2	497	1436	1921	939	12.0785	14.9544	17.174	14.7356	4	0	1	0	3	0	4	1	3	48.4608	15.2373	13.8934	1.03296	-0.818896	-0.316233	-0.0340555
NM_011814	Fxr2	347	2372	2970	2025	23.7221	22.4211	17.1821	21.1084	11	1	16	1	38	2	10	15	36	56.1786	105.984	77.3088	1.03191	1.76382	1.89391	1.56321
NM_001285531	Tle1	888	1491	2098	603	22.6885	20.5633	21.225	21.4923	3	0	1	0	3	0	3	1	3	56.5979	23.7277	21.6349	1.03189	-0.406184	0.043298	0.223001
NM_018803	Syt10	91	1663	1845	1572	2.96859	1.70559	1.67364	2.11594	3	0	0	0	2	2	3	0	0	21.7103	1	1	1.03151	-3.585	-2.67566	-1.74305
NM_009127	Scd1	300	1368	4837	1068	4.86898	5.66626	5.64465	5.3933	3	0	3	1	12	0	3	2	12	31.9556	26.7936	48.8609	1.03141	0.597921	2.24221	1.29051
NM_007923	Elk4	345	1638	3671	1293	16.6694	18.3332	19.5235	18.1754	6	0	2	0	11	0	6	2	11	52.7897	22.1312	36.9952	1.03133	-0.40619	0.941381	0.522173
NM_029909	C330018D20Rik	154	502	2416	348	4.92554	5.29398	6.92857	5.71603	1	0	0	0	0	0	1	0	0	32.6902	1	1	1.02955	-4.18074	-3.41143	-2.18754
NM_172674	Phf20	183	3216	5733	3033	22.7982	20.3445	20.7507	21.2978	16	1	18	2	17	1	15	16	16	56.262	75.478	22.9403	1.02872	1.26875	0.13455	0.810673
NM_172565	Klhl11	54	2184	2436	2130	11.6302	9.95932	11.2749	10.9548	8	0	9	3	29	2	8	6	27	42.7274	40.3036	55.1234	1.02806	0.762145	1.89155	1.22725
NM_028388	Ndufv2	94	841	1540	747	3.81518	3.82311	6.85956	4.83261	2	0	4	1	8	0	2	3	8	30.4583	57.461	46.5716	1.02762	1.76442	2.25425	1.6821
NM_026880	Pink1	77	1820	2367	1743	72.657	69.3459	65.5705	69.1911	14	0	11	3	43	0	14	8	43	91.3749	65.6697	107.281	1.02593	0.361587	1.48763	0.958382
NM_027181	Pin4	57	453	475	396	5.34601	4.91522	2.39501	4.21875	1	0	0	0	1	0	1	0	1	28.7277	1	10.9814	1.02421	-3.99866	0.270439	-0.901336
NM_029679	Fam65b	240	3477	5598	3237	18.7584	19.3663	17.2157	18.4468	15	0	11	2	33	1	15	9	32	52.7163	39.7807	42.9891	1.02048	0.430913	1.14704	0.866144
NM_175337	Mlh3	125	4361	5517	4236	8.78139	7.56219	8.13036	8.15798	15	1	8	1	49	1	14	7	48	37.5983	23.6437	49.2761	1.0193	0.169402	1.94802	1.04557
NM_019789	Kcnip3	140	911	2754	771	45.2171	41.4665	38.4168	41.7001	6	1	2	0	2	0	5	2	2	73.7755	37.1149	11.2805	1.01915	-0.158091	-1.38697	-0.175303
NM_026482	Atp2b1	443	4106	7130	3663	314.823	341.418	343.181	333.141	65	9	52	5	170	2	56	47	168	173.919	183.583	199.445	1.01751	0.902542	1.21858	1.04621
NM_007499	Atm	139	9340	11964	9201	3.17958	3.12234	2.63529	2.97907	22	2	30	4	69	1	20	26	68	24.7281	40.4307	32.1385	1.01534	1.54729	2.07728	1.54664
NM_027357	Psmd1	171	3033	3256	2862	6.11686	5.29997	5.04128	5.48604	12	4	10	0	46	2	8	10	44	31.7992	49.9923	66.8551	1.01417	1.48752	2.68195	1.72788
NM_001190187	Nrg3	288	2427	4009	2139	18.5926	18.3827	20.3909	19.122	10	0	5	1	17	2	10	4	15	53.1846	26.756	30.4952	1.01181	-0.162842	0.625034	0.491334
NM_152895	Kdm5b	161	4796	6300	4635	13.5543	13.5186	14.6783	13.917	20	1	13	1	49	0	19	12	49	46.6337	37.0428	45.9725	1.01159	0.496956	1.45246	0.987001
NM_011181	Cyth2	200	1403	2527	1203	8.57111	9.31948	7.26736	8.38599	4	0	3	1	2	0	4	2	2	37.826	23.7868	7.22963	1.01158	0.161588	-0.841281	0.110628
NM_001081270	Dscaml1	0	6336	6885	6336	21.5364	25.5802	22.2121	23.1096	33	1	29	2	63	1	32	27	62	57.4554	60.9707	42.5528	1.01033	0.911867	0.965472	0.962557
NM_010200	Fgf13	373	1111	2499	738	73.2225	68.3639	77.9102	73.1655	8	2	7	1	29	1	6	6	28	92.4892	116.323	164.988	1.01012	1.15295	2.06725	1.41011
NM_177784	Klhl23	274	1951	4617	1677	28.3089	26.5593	25.7313	26.8665	11	2	10	2	27	2	9	8	25	61.0528	68.2542	64.8274	1.00815	0.98437	1.4613	1.15127
NM_001172098	Strn3	211	2350	3912	2139	45.082	51.8708	57.1641	51.3723	17	2	10	7	51	1	15	3	50	79.7768	20.067	101.651	1.00762	-1.17031	1.63032	0.489211
NM_148948	Dicer1	279	6000	9851	5721	14.1524	11.675	14.353	13.3935	24	1	28	2	64	0	23	26	64	45.7354	65.024	48.6474	1.00639	1.33172	1.56244	1.30018
NM_001081080	Phf3	26	6104	7561	6078	21.4746	20.0577	19.4954	20.3425	32	3	24	2	59	2	29	22	57	54.2792	51.7886	40.7817	1.00432	0.752839	0.998564	0.918573
NM_019746	Pdcd5	111	492	642	381	4.88606	6.95707	2.53145	4.79153	1	0	0	1	0	0	1	-1	0	29.8587	1	1	1.00402	-4.07497	-3.2808	-2.11725
NM_011123	Plp1	168	1002	3473	834	159.008	129.277	151.896	146.727	13	4	30	8	75	1	9	22	74	122.764	377.424	385.849	1.00383	2.43385	2.77773	2.0718
NM_001285458	Fmn1	217	4216	11523	3999	1.73706	1.92925	1.73478	1.80036	8	1	4	0	12	0	7	4	12	19.9133	14.3114	13.0491	1.00315	0.350913	1.1498	0.834622
NM_001081241	Fam65a	145	3817	4134	3672	35.7958	37.4463	33.1013	35.4478	22	0	17	2	48	1	22	15	47	68.1579	58.4469	55.6604	1.00173	0.594416	1.03613	0.877424
NM_027860	0610010F05Rik	278	2435	4140	2157	11.5578	10.3962	11.3842	11.1127	10	2	8	1	9	0	8	7	9	42.1926	46.4323	18.1445	1.00135	0.957785	0.277817	0.745652
NM_009155	Sepp1	89	1232	2030	1143	7.4319	7.70076	13.8501	9.66093	5	1	5	3	16	1	4	2	15	39.8116	25.0355	57.0685	1.00102	0.150558	2.03464	1.06207
NM_178634	Csrnp3	193	1987	10510	1794	17.6093	17.1244	17.5972	17.4436	8	0	5	1	14	0	8	4	14	50.7299	31.9014	33.9357	0.998405	0.145986	0.847271	0.663887
NM_026910	Tnik	429	4512	7115	4083	25.228	22.9557	25.8111	24.665	23	2	23	3	53	3	21	20	50	58.5108	70.0847	53.2528	0.997761	1.0738	1.24085	1.10414
NM_009753	Bicd1	445	2953	9667	2508	10.7751	9.89164	10.3224	10.3297	9	0	9	1	13	0	9	8	13	40.8236	45.6389	22.5407	0.997325	0.97672	0.644917	0.872987
NM_026748	Ints1	208	6877	7113	6669	8.56105	8.4342	5.62064	7.53863	22	1	20	0	61	3	21	20	58	35.8224	42.9083	37.8198	0.996563	1.07654	1.62473	1.23261
NM_001112700	Cyth1	66	1269	3119	1203	77.1853	82.6335	77.8465	79.2217	10	0	4	1	9	1	10	3	8	94.5651	35.6803	28.9185	0.994736	-0.59967	-0.503933	-0.0362889
NM_172903	Man2a2	493	3952	6554	3459	46.5853	48.8035	43.1466	46.1785	24	1	29	8	96	1	23	21	95	75.6438	86.8643	119.433	0.994416	1.00752	1.94181	1.31458
NM_001045536	Zzef1	71	8747	11150	8676	12.526	11.5985	11.748	11.9575	36	3	32	3	93	2	33	29	91	43.2704	47.8246	45.6114	0.994065	0.956486	1.55344	1.168
NM_178624	Fbxl2	56	1328	3203	1272	19.1206	19.7759	21.6658	20.1874	6	0	3	1	4	0	6	2	4	53.6612	22.4965	13.6749	0.99236	-0.445506	-0.572161	-0.00843599
NM_207214	Exoc5	515	2642	4659	2127	23.1269	23.6399	28.9178	25.2282	12	1	13	0	20	0	11	13	20	58.8331	87.4477	40.8897	0.992224	1.37959	0.843014	1.07161
NM_007664	Cdh2	852	3573	4843	2721	30.031	35.2131	38.1548	34.4663	19	3	14	2	43	2	16	12	41	66.8941	63.0994	65.525	0.991465	0.721749	1.29231	1.00184
NM_030702	Senp3	319	2026	2442	1707	27.7094	28.5575	23.2265	26.4978	10	1	16	2	33	0	9	14	33	59.9798	117.346	84.0682	0.990804	1.77443	1.84649	1.53724
NM_198420	Arhgap39	260	3497	4494	3237	81.4122	79.4868	80.3915	80.4302	27	0	30	3	74	4	27	27	70	94.8893	119.342	94.0387	0.99065	1.13316	1.18612	1.10331
NM_028116	Pygo1	262	1516	1745	1254	12.9543	15.4737	12.0143	13.4808	5	0	2	0	9	0	5	2	9	45.3596	22.8194	31.2102	0.99061	-0.182882	0.917286	0.575005
NM_010771	Matr3	316	2857	4472	2541	149.608	133.833	150.962	144.801	29	2	36	3	94	3	27	33	91	120.88	185.815	155.736	0.989391	1.41946	1.47857	1.29581
NM_015735	Ddb1	81	3504	4164	3423	19.6343	20.1606	19.7489	19.848	18	2	29	4	93	1	16	25	92	53.1752	104.497	116.878	0.989345	1.78035	2.53579	1.7685
NM_138584	Spg21	242	1169	2690	927	8.45896	9.2076	6.827	8.16452	3	0	0	0	1	0	3	0	1	36.8161	1	4.69107	0.988489	-4.39446	-1.44547	-1.61715
NM_145540	Ints3	686	3812	4460	3126	13.14	12.3587	11.5512	12.35	12	0	5	0	19	0	12	5	19	43.6705	22.8851	26.4312	0.988092	-0.126215	0.742372	0.53475
NM_011137	Pou2f1	12	2394	12978	2382	4.0783	4.27065	5.04662	4.46519	6	0	1	0	6	0	6	1	6	28.6554	6.00663	10.9537	0.986726	-1.44613	0.224767	-0.0782136
NM_172787	L3mbtl3	91	2743	3411	2652	2.02902	1.66654	2.95402	2.21653	5	0	1	0	6	0	5	1	6	21.4483	5.39509	9.83851	0.98631	-1.18119	0.588396	0.131172
NM_145969	Dennd6a	85	1765	2684	1680	4.04415	4.08461	3.57251	3.90042	5	1	1	1	13	0	4	0	13	27.0861	1	33.65	0.986091	-3.95162	1.94407	-0.340486
NM_016810	Gosr1	5	758	4265	753	14.161	14.0186	12.5366	13.5721	3	0	1	0	1	0	3	1	1	45.3234	19.001	5.77506	0.985435	-0.451113	-1.52182	-0.329167
NM_001122594	Phlpp2	16	4084	7847	4068	13.1664	11.9789	14.3734	13.1729	17	1	12	3	35	1	16	9	34	44.7441	31.6544	36.3454	0.984672	0.30311	1.15415	0.813976
NM_152825	Usp45	58	2500	6007	2442	19.2551	17.6422	18.0456	18.3143	12	1	10	0	15	1	11	10	14	51.244	58.5905	24.9307	0.983917	0.993833	0.366326	0.781359
NM_008071	Gabrb3	103	1525	5568	1422	164.263	164.042	175.478	167.928	19	3	15	1	30	1	16	14	29	128.002	140.864	88.6849	0.983645	0.931067	0.556531	0.823748
NM_012014	Gprin1	559	3358	4348	2799	99.6054	84.0936	77.4842	87.0611	24	0	19	5	68	1	24	14	67	97.5449	71.5645	104.093	0.983243	0.347882	1.27402	0.868382
NM_181058	Zbtb20	532	2539	2923	2007	111.49	122.555	141.78	125.275	25	5	18	3	66	4	20	15	62	113.365	106.934	134.337	0.98314	0.709142	1.37257	1.02162
NM_001081161	Fam171a1	168	2847	4146	2679	42.9339	45.54	38.023	42.1656	18	1	11	0	18	0	17	11	18	72.1892	58.7479	29.2181	0.981173	0.497794	-0.0221513	0.485605
NM_133215	Mtmr4	76	3649	5692	3573	21.3966	20.8477	21.0429	21.0958	20	3	11	2	46	0	17	9	46	54.1268	36.0398	55.9856	0.978585	0.207998	1.42878	0.871787
NM_175256	Heg1	146	3395	4780	3249	1.98957	1.46531	2.95798	2.13762	6	0	2	1	8	0	6	1	8	21.0086	4.40375	10.7076	0.978039	-1.45238	0.737356	0.0876732
NM_021450	Trpm7	285	5877	7145	5592	14.913	14.9601	14.671	14.8481	25	2	21	1	52	2	23	20	50	46.7904	51.1724	38.8825	0.977826	0.924308	1.16287	1.02167
NM_153135	Unc5d	298	3169	9220	2871	4.70371	3.80938	4.05416	4.18908	7	0	2	0	8	1	7	2	7	27.7371	9.96711	10.6027	0.977791	-0.677249	0.225037	0.175193
NM_001109975	Synpo	529	2602	4479	2073	107.831	104.139	97.7508	103.24	20	1	11	2	36	1	19	9	35	104.268	62.1178	73.421	0.977786	0.0414652	0.644209	0.554487
NM_001080748	Gtf2i	383	3260	4337	2877	50.1587	46.5537	43.5432	46.7519	21	2	19	3	67	5	19	16	62	75.1294	79.5706	93.7137	0.977215	0.873597	1.58281	1.14454
NM_011660	Txn1	201	519	1051	318	7.91165	7.05065	8.35016	7.77082	1	0	0	0	3	0	1	0	3	35.7741	1	41.0247	0.976533	-4.36483	1.71963	-0.556225
NM_001128103	Ano3	141	3087	6026	2946	50.0722	50.435	49.705	50.0707	22	2	18	5	45	3	20	13	42	77.2313	63.1369	61.9966	0.976138	0.498732	0.935958	0.803609
NM_001081379	Ankrd11	458	8390	8719	7932	97.1155	68.4456	71.3711	78.9774	74	9	69	4	170	3	65	65	167	93.2238	117.247	91.5557	0.975969	1.11854	1.16101	1.08517
NM_001024616	Rabl6	204	2382	3155	2178	63.3004	62.8687	56.1475	60.7722	16	0	14	1	42	1	16	13	41	83.5715	85.4	81.8611	0.974491	0.81837	1.19354	0.995467
NM_001252310	Fam19a5	193	592	2651	399	64.9108	71.528	56.4616	64.3002	3	0	2	0	6	0	3	2	6	85.5352	71.7182	65.3928	0.974356	0.532646	0.827713	0.778239
NM_021899	Foxj2	801	2499	5013	1698	15.5045	15.349	14.3618	15.0718	8	1	5	0	21	1	7	5	20	46.8983	42.1313	51.2205	0.972231	0.63487	1.54939	1.05216
NM_026389	Poldip2	16	1123	1951	1107	29.7574	28.7204	29.2384	29.2387	6	0	2	1	16	0	6	1	16	61.6595	12.9248	62.8527	0.971969	-1.46713	1.35402	0.286288
NM_019737	B4galt6	937	2086	5808	1149	66.2426	71.5709	76.4745	71.4293	9	0	5	0	30	2	9	5	28	89.1084	62.2619	105.972	0.970717	0.265624	1.44634	0.894227
NM_146014	Ccm2	113	1475	1875	1362	10.3035	13.9678	9.96782	11.413	6	1	5	1	7	0	5	4	7	41.7628	42.0199	22.3497	0.970685	0.797746	0.558805	0.775745
NM_144880	Ppp2r5a	625	2086	3082	1461	2.73028	3.32658	2.37292	2.80993	5	2	4	2	13	0	3	2	13	23.3597	19.5863	38.6941	0.968052	0.53673	2.38837	1.29772
NM_027326	Mllt3	312	2022	6112	1710	9.43362	10.3636	11.0349	10.2774	6	0	1	0	6	1	6	1	5	39.9164	8.36713	12.7153	0.967933	-1.46769	-0.177292	-0.225684
NM_172464	Daam1	166	3400	5888	3234	11.9573	10.3958	13.0004	11.7845	12	0	13	4	34	2	12	9	32	42.2122	39.8176	43.029	0.967031	0.700876	1.48014	1.04935
NM_001290545	Aftph	283	3079	4046	2796	28.1937	25.4151	32.7367	28.7819	20	5	26	1	55	2	15	25	53	61.031	127.931	82.4309	0.966576	1.84946	1.75689	1.52431
NM_146152	Ipo13	628	3520	3588	2892	14.6682	11.7693	11.1426	12.5267	12	1	13	2	56	1	11	11	55	43.2704	54.4211	82.702	0.966343	1.11502	2.37754	1.4863
NM_010251	Gabra4	499	2158	4123	1659	56.2401	58.1535	63.6594	59.351	13	1	15	3	34	0	12	12	34	82.287	103.492	89.1218	0.966251	1.10977	1.33366	1.13656
NM_001110327	Dmtf1	292	2368	3529	2076	22.0526	21.6022	22.9341	22.1963	12	2	9	0	16	0	10	9	16	54.7985	62.028	33.5154	0.966064	0.960842	0.650895	0.859267
NM_008997	Rab11b	224	881	6065	657	40.695	37.3236	39.7387	39.2524	4	0	4	0	11	0	4	4	11	69.2613	87.1098	72.8079	0.964118	1.10901	1.34809	1.14041
NM_001282992	Pcnt	294	8991	9476	8697	3.47845	3.2994	3.0871	3.28832	20	1	15	4	53	0	19	11	53	24.8531	18.0965	26.5007	0.96373	0.328352	1.72589	1.00599
NM_026305	Tceb2	24	381	508	357	40.3819	28.5747	27.513	32.1565	2	0	0	0	2	0	2	0	2	63.7321	1	24.362	0.962959	-5.21622	-0.0837441	-1.44567
NM_001013749	Tmem151b	278	1964	4851	1686	32.1678	30.2793	23.4515	28.6329	9	0	11	1	29	0	9	10	29	60.7269	84.8623	74.7983	0.962465	1.2604	1.62056	1.28114
NM_028850	Chic2	343	841	2550	498	2.94842	2.70693	2.42185	2.6924	1	0	0	0	0	0	1	0	0	22.8437	1	1	0.961299	-3.72943	-2.85404	-1.87406
NM_008512	Lrp1	461	14099	14892	13638	17.3895	16.9252	15.3439	16.5529	62	4	57	7	203	6	58	50	197	48.3809	52.4556	62.8155	0.961253	0.894884	1.77439	1.21018
NM_025709	Gapvd1	582	4896	5966	4314	12.1182	11.6721	11.9042	11.8982	18	2	17	7	84	2	16	10	82	42.1926	33.1659	82.6581	0.96064	0.431419	2.41488	1.26898
NM_011373	St6galnac4	592	1501	3994	909	8.77643	9.98834	8.17884	8.9812	3	0	0	0	1	0	3	0	1	37.5451	1	4.78396	0.959944	-4.45161	-1.48777	-1.65981
NM_010092	Dyrk1b	259	2029	2404	1770	10.3766	9.75408	8.65325	9.59466	8	2	5	1	13	0	6	4	13	38.5633	32.334	31.939	0.959158	0.52376	1.20236	0.895092
NM_027694	Golga7b	433	937	2823	504	37.586	36.5695	38.4565	37.5373	3	0	2	0	5	0	3	2	5	67.7153	56.7769	43.1411	0.958185	0.518261	0.626134	0.70086
NM_172151	Zdhhc8	126	2415	4868	2289	39.563	42.0178	38.7267	40.1025	15	1	8	1	37	1	14	7	36	69.5791	43.7547	68.3925	0.957948	0.102767	1.24197	0.767561
NM_053076	Rtn3	208	922	2857	714	449.028	472.908	467.476	463.137	14	2	10	1	35	1	12	9	34	191.196	180.35	207.077	0.957745	0.679408	1.02884	0.888663
NM_173876	Clcn3	178	2554	5250	2376	42.3558	41.9575	45.722	43.3451	17	2	12	1	59	3	15	11	56	71.8193	66.2398	102.493	0.957313	0.654416	1.76801	1.12658
NM_022419	Abhd8	182	1502	1985	1320	86.1627	91.7937	77.7798	85.2454	12	1	17	2	53	0	11	15	53	94.8015	162.589	174.604	0.95465	1.54443	2.03583	1.51164
NM_029881	Tmem200a	931	2407	4115	1476	14.9192	16.0344	14.1784	15.044	6	0	1	0	5	0	6	1	5	46.2446	9.69362	14.7311	0.953081	-1.48381	-0.247098	-0.259275
NM_008981	Ptprg	695	5024	9190	4329	14.9482	15.5744	17.2068	15.9098	20	2	26	2	56	0	18	24	56	47.3022	79.3225	56.2538	0.952344	1.51527	1.64456	1.37072
NM_024266	Rps25	41	419	684	378	25.6964	27.9004	32.3137	28.6368	2	0	4	0	7	0	2	4	7	60.1914	151.405	80.53	0.949604	2.09554	1.72697	1.59071
NM_172495	Ncoa7	341	3173	5107	2832	17.9588	15.2851	17.057	16.767	13	1	17	4	38	1	12	13	37	48.2041	65.6784	56.8146	0.948312	1.2115	1.62002	1.25994
NM_138599	Tomm70a	148	1984	3778	1836	60.2688	52.0447	62.8481	58.3872	14	1	9	0	37	0	13	9	37	80.5503	70.1362	87.6356	0.945236	0.558294	1.32152	0.941683
NM_011385	Ski	15	2199	5465	2184	58.6744	52.9933	51.2983	54.322	15	0	17	1	59	0	15	16	59	78.1331	104.819	117.476	0.944303	1.18122	1.79773	1.30775
NM_024226	Rtn4	286	886	3271	600	123.39	145.826	135.689	134.968	6	0	13	3	39	0	6	10	39	113.762	238.463	282.66	0.943751	1.82151	2.39061	1.71862
NM_009700	Aqp4	127	1099	5156	972	3.55376	1.90971	3.37268	2.94538	2	0	0	0	2	0	2	0	2	23.4078	1	8.94778	0.942951	-3.78327	0.241	-0.866439
NM_146241	Trhde	70	3148	5722	3078	6.22173	6.20911	8.26511	6.89865	10	1	10	3	30	1	9	7	29	33.2637	32.5388	40.9714	0.942535	0.730624	1.80589	1.15968
NM_001145897	Gse1	100	3733	6513	3633	57.1686	47.4119	44.3664	49.649	24	0	19	3	42	1	24	16	41	75.1523	63.0126	49.0761	0.941811	0.500959	0.605052	0.682607
NM_177047	Auts2	520	4305	6059	3785	40.0943	33.3062	36.3448	36.5818	22	0	22	0	58	0	22	22	58	66.1231	83.1628	66.6367	0.939229	1.08435	1.27248	1.09869
NM_027135	Sec24d	83	3182	3857	3099	5.51228	5.00049	4.88778	5.13352	9	1	6	1	22	0	8	5	22	29.3673	23.0845	30.8711	0.938983	0.412551	1.61634	0.989291
NM_052835	Rpl10	82	727	795	645	44.9061	41.6255	41.9074	42.813	4	0	5	0	12	0	4	5	12	70.5499	110.913	80.9046	0.93895	1.40548	1.43593	1.26012
NM_029402	Cul2	195	2433	4158	2238	7.96325	9.00847	7.58265	8.18479	8	1	6	0	19	0	7	6	19	35.5823	38.3587	36.9186	0.937835	0.865535	1.52905	1.11081
NM_053092	Kars	86	1874	2043	1788	5.97105	6.95615	5.80708	6.24476	6	1	4	0	2	0	5	4	2	31.8126	32.0085	4.86423	0.937551	0.766613	-1.19471	0.169816
NM_172624	Dpp9	233	2822	3509	2589	16.3748	17.6753	17.507	17.1857	13	2	6	1	32	1	11	5	31	48.3345	27.6319	52.0692	0.937502	-0.0523704	1.47593	0.787019
NM_013902	Fkbp3	16	691	945	675	8.21951	6.12283	7.22306	7.18847	2	0	2	0	3	0	2	2	3	33.7072	42.3934	19.3272	0.937111	1.08763	0.691439	0.905395
NM_178602	Polr2m	187	1288	2248	1101	46.8233	44.4784	45.8349	45.7122	8	1	9	0	20	0	7	9	20	72.3281	116.957	78.994	0.9358	1.44275	1.35294	1.24383
NM_007964	Evi5	68	2498	5849	2430	14.9995	14.908	17.9774	15.9616	10	0	6	0	21	1	10	6	20	46.8155	35.3279	35.7911	0.935486	0.346397	0.989802	0.757228
NM_025788	Nacc1	196	1741	4304	1545	38.9862	35.8257	36.7027	37.1715	10	1	8	1	43	0	9	7	43	66.269	64.8249	121.03	0.932875	0.715375	2.12161	1.25662
NM_173437	Nav1	35	5663	12767	5628	51.2031	52.1584	56.303	53.2215	42	4	27	2	78	1	38	25	77	76.8114	63.5563	59.496	0.931892	0.4717	0.831381	0.744991
NM_001033304	5330417C22Rik	259	2995	3326	2736	3.47311	3.87606	3.1761	3.50843	7	1	9	1	20	0	6	8	20	24.9478	41.8356	31.7882	0.930589	1.49853	1.94037	1.4565
NM_146087	Csnk1a1	169	1147	2013	978	81.9961	78.3639	94.3788	84.9129	11	3	9	1	26	1	8	8	25	93.0567	117.037	111.161	0.93018	1.07251	1.38729	1.12999
NM_176962	Zfp944	508	1987	2784	1479	9.33586	9.73534	10.9747	10.0153	6	1	2	0	3	1	5	2	2	38.459	19.3479	5.88049	0.929671	-0.242834	-1.27072	-0.194628
NM_001098837	Atxn7l3	287	1331	3686	1044	54.8028	53.9771	48.8526	52.5442	7	0	9	2	26	1	7	7	25	76.277	95.9335	104.134	0.929455	1.07338	1.64843	1.21709
NM_018788	Extl3	664	3424	5978	2760	37.206	38.2064	35.641	37.0178	16	0	19	2	51	1	16	17	50	65.9488	88.1277	78.7794	0.928358	1.16091	1.50521	1.19816
NM_001039578	Evi5l	228	1449	1542	1221	5.55389	4.1473	4.21579	4.63899	3	0	5	0	5	0	3	5	5	27.9513	58.5905	17.8076	0.928072	1.81701	0.897571	1.21422
NM_011324	Scnn1a	541	2644	3499	2103	4.68172	4.32266	3.85512	4.2865	5	0	1	0	6	0	5	1	6	27.0475	6.80351	12.4069	0.927764	-1.24193	0.434729	0.040189
NM_023605	Fbxo9	363	1674	2155	1311	20.7945	21.0086	20.9653	20.9228	6	0	1	0	5	0	6	1	5	52.0649	10.9136	16.5851	0.927461	-1.51052	-0.320292	-0.301118
NM_178405	Atp1a2	172	3235	6227	3063	10.2509	8.91697	15.8943	11.6874	12	1	11	4	44	2	11	7	42	40.8547	32.6982	59.6285	0.924807	0.421641	1.95696	1.10114
NM_172426	Slc24a2	373	2374	10594	2001	92.8381	92.5798	96.3853	93.9344	19	2	13	3	34	0	17	10	34	96.6492	71.5032	73.8896	0.924635	0.301095	0.723325	0.649685
NM_027910	Klhdc3	441	1590	2126	1149	59.9088	56.2937	57.9441	58.0489	8	0	3	1	26	0	8	2	26	79.2075	24.9048	98.4022	0.924448	-0.93196	1.493	0.495161
NM_025695	Smc6	408	3702	5603	3294	5.89177	5.70688	6.52628	6.04164	10	1	9	0	18	0	9	9	18	31.0824	39.0923	23.763	0.923767	1.07487	1.1182	1.03894
NM_172436	Slc25a12	30	2064	2924	2034	31.673	32.6679	30.2916	31.5442	11	0	11	3	34	1	11	8	33	61.5231	56.2745	70.5528	0.923529	0.609713	1.46456	0.999268
NM_173760	Ppip5k2	503	3893	5568	3390	5.44592	5.79745	5.72085	5.65474	9	0	3	1	4	1	9	2	3	30.2022	8.44117	3.84834	0.921776	-1.09683	-1.45921	-0.544754
NM_011065	Per1	186	4062	4663	3876	17.3303	16.3052	16.0323	16.5559	17	1	12	3	40	0	16	9	40	46.9605	33.2224	44.8774	0.918153	0.235833	1.28913	0.814371
NM_026165	Slc25a46	91	1348	4371	1257	32.7157	32.2575	37.553	34.1754	7	0	4	1	14	0	7	3	14	63.3518	34.1475	48.4333	0.918025	-0.159017	0.86254	0.540516
NM_001008231	Daam2	193	3541	6045	3348	1.22728	1.04113	1.98948	1.41929	6	1	6	1	24	1	5	5	23	16.9895	21.3677	29.874	0.915844	1.07175	2.52082	1.50281
NM_010238	Brd2	1534	3931	4487	2397	35.2101	33.1429	28.324	32.2257	15	2	9	2	47	3	13	7	44	61.6981	41.7833	79.8245	0.914884	0.167344	1.62686	0.903031
NM_010322	Gnpat	205	2242	2984	2037	19.3392	18.6419	20.9139	19.6317	9	0	6	0	21	3	9	6	18	50.2629	42.1437	38.4267	0.914617	0.476844	0.939085	0.776848
NM_009746	Bcl7c	239	893	965	654	1.59951	1.57788	1.34731	1.50823	1	0	1	0	1	0	1	1	1	17.3948	21.8774	6.64927	0.91362	1.06932	0.308199	0.763715
NM_001029878	Lonrf2	0	1557	5077	1557	31.9519	25.3125	27.9134	28.3926	8	0	9	2	20	2	8	7	18	58.4518	64.3253	50.2731	0.912398	0.865718	1.05357	0.943897
NM_029784	Fam81a	331	1426	2883	1095	24.058	17.112	22.9432	21.3711	5	0	4	0	14	1	5	4	13	51.946	52.2659	51.6275	0.911526	0.736505	1.30226	0.983431
NM_028193	Brf1	265	2296	2755	2031	8.22324	6.96385	7.19684	7.46131	6	0	2	1	11	0	6	1	11	33.6076	7.0447	23.5523	0.910634	-1.52393	0.949096	0.111934
NM_013865	Ndrg3	158	1286	2644	1128	205.417	212.311	186.798	201.509	16	3	8	0	29	1	13	8	28	131.108	101.474	107.944	0.909561	0.348584	0.70509	0.654412
NM_053201	Magee1	233	2990	3584	2757	72.9225	63.3305	61.2166	65.8232	21	1	21	1	63	2	20	20	61	82.5258	103.792	96.2154	0.908727	1.0519	1.36752	1.10938
NM_007968	Ewsr1	67	2035	2412	1968	47.4173	45.6206	36.9238	43.3206	16	4	13	0	47	1	12	13	46	69.3669	94.5128	101.645	0.907527	1.16757	1.75644	1.27718
NM_198296	9130011E15Rik	84	2154	2896	2070	3.16353	3.50518	1.40296	2.69056	4	0	2	1	4	0	4	1	4	21.9829	6.91198	8.40313	0.906294	-0.939922	0.217394	0.0612551
NM_175164	Arhgap26	331	2776	7899	2445	16.9312	16.6806	15.9865	16.5327	10	0	4	1	11	1	10	3	10	46.5283	17.5556	17.7858	0.905651	-0.683555	-0.0451032	0.0589975
NM_010431	Hif1a	423	2934	4761	2511	20.9581	16.8011	20.8226	19.5273	15	4	14	1	51	2	11	13	49	49.8359	74.0746	84.8596	0.905486	1.2937	2.086	1.4284
NM_019930	Ranbp9	45	2178	3064	2133	22.2793	21.7332	25.1416	23.0514	11	1	9	0	33	0	10	9	33	53.3342	60.3704	67.2782	0.904451	0.899105	1.62823	1.14393
NM_019790	Tmeff2	425	1550	3339	1125	20.8172	20.2777	19.8099	20.3016	5	0	4	0	7	0	5	4	7	50.5608	50.8721	27.0581	0.903137	0.728287	0.408193	0.679872
NM_024195	Cyb5r4	150	1737	2629	1587	8.16281	9.11235	9.27266	8.84927	5	0	4	0	9	1	5	4	8	35.8418	36.0625	21.9212	0.901782	0.729687	0.719241	0.78357
NM_007505	Atp5a1	283	1945	2432	1662	114.651	114.449	110.128	113.076	17	2	17	2	44	5	15	15	39	102.673	129.132	102.043	0.901299	1.04268	1.05175	0.998577
NM_133931	Pot1a	384	2307	3153	1923	3.47418	3.57362	2.6803	3.2427	4	0	3	0	6	0	4	3	6	23.6634	22.321	13.5682	0.90129	0.639417	0.770432	0.77038
NM_001038698	Elavl4	270	1413	4008	1143	28.0759	27.1504	36.2099	30.4787	6	0	4	2	11	1	6	2	10	59.7175	25.0355	38.0457	0.901037	-0.538195	0.599029	0.320623
NM_001199431	Dnmt1	192	5055	5370	4863	4.09828	4.42334	3.41986	3.98049	12	1	15	2	26	0	11	13	26	25.7327	38.2483	23.2499	0.900023	1.29352	1.39564	1.19639
NM_181347	Dennd1b	251	2327	8072	2076	3.89226	4.31342	5.69782	4.6345	5	0	1	0	6	0	5	1	6	27.3993	6.892	12.5683	0.899872	-1.27008	0.395579	0.00845812
NM_153166	Cpne5	83	1865	4366	1782	5.86182	7.30054	6.96084	6.70773	5	0	1	0	5	0	5	1	5	31.9197	8.02906	12.2015	0.899765	-1.27141	0.0791132	-0.097511
NM_053099	Setbp1	369	5118	9955	4749	11.7288	11.8794	12.8154	12.1412	17	0	14	1	26	0	17	13	26	40.7233	39.1664	23.808	0.897451	0.659212	0.604201	0.720288
NM_009030	Rbbp4	137	1415	4407	1278	21.8508	22.8265	25.5561	23.4111	7	1	4	1	7	1	6	3	6	53.4093	33.5864	20.4161	0.89725	0.0438555	-0.103675	0.279144
NM_011800	Cdh20	220	2626	3722	2406	3.3979	2.37275	4.01712	3.26259	5	0	2	0	16	1	5	2	15	23.6413	11.8934	27.1111	0.896294	-0.272489	1.76455	0.79612
NM_026303	Alkbh8	27	2022	2270	1995	3.79467	2.32534	2.86377	2.99459	5	1	5	1	3	0	4	4	3	22.8094	28.6873	6.53928	0.895713	1.04914	-0.223666	0.573729
NM_025547	Mterf3	158	1397	1486	1239	4.22187	3.62048	6.34326	4.72854	3	0	2	1	2	0	3	1	2	27.5452	11.5479	7.01956	0.895561	-0.537488	-0.459625	-0.0338509
NM_011322	Scn1b	240	897	1515	657	122.654	117.993	111.886	117.511	6	0	4	0	35	1	6	4	34	103.892	87.1098	225.043	0.895391	0.45168	2.16429	1.17045
NM_029933	Bcl9	626	4904	6102	4278	21.1666	20.5283	19.9753	20.5567	23	4	14	3	59	1	19	11	58	50.5253	36.7895	58.9574	0.89468	0.253221	1.52256	0.890154
NM_177267	Dcaf5	203	3044	5707	2841	24.4463	21.3443	20.7313	22.174	14	1	13	0	50	1	13	13	49	52.0557	65.4703	75.0026	0.892582	1.03937	1.81376	1.24857
NM_001081009	Parp8	46	2722	3088	2676	4.19227	4.86512	2.78934	3.94891	7	1	5	0	18	0	6	5	18	25.5071	26.7335	29.2508	0.892071	0.781548	1.7328	1.13547
NM_144946	Neto1	931	2533	3531	1602	13.5794	12.908	14.5443	13.6772	6	0	8	0	33	1	6	8	32	42.6074	71.4496	86.8638	0.891682	1.45511	2.38331	1.5767
NM_170779	Wwc1	0	3315	3315	3315	6.41354	6.39988	6.03011	6.28118	10	1	19	3	44	1	9	16	43	30.8855	69.0572	56.4074	0.891419	1.87247	2.33658	1.70016
NM_026651	Pomgnt1	159	2142	2719	1983	11.317	10.9761	13.3291	11.8741	7	0	2	0	11	0	7	2	11	40.158	14.4304	24.1225	0.890546	-0.767951	0.639605	0.254066
NM_028904	Rmi1	311	2162	3522	1851	10.0516	10.03	8.90577	9.66243	6	0	6	1	12	1	6	5	11	36.8758	38.6488	25.8427	0.890406	0.776913	0.891584	0.852968
NM_028802	Gpcpd1	202	2230	3701	2028	32.961	27.9489	39.96	33.6233	12	1	6	3	10	1	11	3	9	61.7051	21.1654	19.2986	0.889738	-0.839327	-0.452904	-0.134164
NM_001003671	Pcdhac1	0	2895	5296	2895	1.31623	1.09254	1.28886	1.23254	5	1	1	0	2	0	4	1	2	15.7184	4.94224	3.00423	0.887758	-0.955868	-0.688551	-0.25222
NM_207302	Zranb1	0	2127	2127	2127	14.8882	14.6514	12.2252	13.9216	8	0	11	4	16	0	8	7	16	42.7877	47.0872	32.7118	0.887216	0.8429	0.961254	0.897123
NM_033618	Supt16	89	3233	4491	3144	5.39932	5.51513	5.31959	5.41135	9	1	8	2	16	0	8	6	16	28.947	27.3049	22.1304	0.886764	0.623192	1.09709	0.869014
NM_146121	Rabgap1	222	3417	4967	3195	15.7985	16.7787	18.1267	16.9013	17	4	13	3	44	1	13	10	43	46.288	44.7818	58.526	0.885038	0.654212	1.65693	1.06539
NM_007547	Sirpa	444	1974	4018	1530	166.785	165.63	165.755	166.056	17	1	7	5	40	3	16	2	37	118.967	18.703	105.163	0.884716	-1.97518	0.810691	-0.0932573
NM_011500	Strn	73	2416	3942	2343	8.3617	6.43772	9.23496	8.01146	8	1	8	1	14	1	7	7	13	33.9877	42.7463	24.1281	0.884448	1.03461	0.931265	0.950108
NM_177721	Ranbp6	24	3342	4867	3318	15.5706	14.704	16.0615	15.4454	13	0	7	1	31	0	13	6	31	44.5721	25.873	40.6291	0.88424	-0.0832522	1.19705	0.666014
NM_001098231	Pdp1	36	1761	4149	1725	31.6221	27.3532	33.7651	30.9134	10	1	4	2	24	0	9	2	24	59.354	16.5887	60.5025	0.883787	-1.14046	1.25781	0.333713
NM_145413	Fam20b	168	1398	4238	1230	25.4478	26.9224	26.4601	26.2768	6	0	4	1	5	0	6	3	5	55.4935	34.897	17.6773	0.883639	0.0298612	-0.396975	0.172175
NM_198865	Slitrk5	617	3491	4807	2874	64.3547	75.2192	70.1194	69.8978	21	0	27	1	65	4	21	26	61	83.1245	129.437	92.2985	0.88335	1.33445	1.26309	1.1603
NM_029349	2310035C23Rik	247	3826	5334	3579	19.1175	17.2419	18.403	18.2541	18	3	16	3	62	0	15	13	62	47.6789	51.9702	75.3323	0.881845	0.822825	1.96411	1.22293
NM_133897	Lrrc8c	235	2647	2829	2412	5.31529	3.40879	6.7788	5.16763	6	0	5	1	19	0	6	4	19	28.2989	23.7277	34.2553	0.881571	0.448227	1.76151	1.03043
NM_030729	Nckipsd	104	2249	2870	2145	27.9317	25.2537	17.7242	23.6365	10	0	3	1	17	0	10	2	17	53.0358	13.3406	34.4646	0.881414	-1.29394	0.644641	0.0773712
NM_028707	Psd2	430	2743	4610	2313	2.44096	1.51935	2.503	2.15444	4	0	2	1	7	0	4	1	7	19.6735	6.18581	13.1605	0.878636	-0.966843	1.02914	0.313644
NM_001081355	Prdm2	160	5290	7308	5130	21.9114	21.9744	21.0376	21.6411	27	4	24	2	45	1	23	22	44	51.0043	61.3589	37.2981	0.877645	0.960381	0.823928	0.887318
NM_153798	Polr2b	128	3653	3812	3525	4.63691	3.62155	4.26335	4.17394	8	0	11	1	29	1	8	10	28	25.8183	40.5895	34.5422	0.876525	1.35078	1.93165	1.38632
NM_177224	Chd9	371	8981	11517	8610	8.54713	8.17933	8.28328	8.33658	28	2	15	3	43	2	26	12	41	34.3531	19.9412	20.7077	0.876162	-0.089284	0.681269	0.489382
NM_001025364	Rtn2	95	710	1080	615	26.2787	25.6595	27.9894	26.6425	3	0	2	0	11	0	3	2	11	55.4935	46.5294	77.7802	0.875399	0.436613	1.7303	1.0141
NM_172409	Fmnl2	275	3527	5851	3252	8.25458	7.78978	10.1383	8.72756	10	0	14	1	30	1	10	13	29	34.9821	57.196	38.7792	0.875013	1.4034	1.55245	1.27696
NM_011213	Ptprf	343	6040	7648	5697	6.99213	6.64965	7.52244	7.05474	16	0	12	2	54	2	16	10	52	31.9499	25.1146	39.6925	0.871062	0.343576	1.74358	0.986071
NM_016959	Rps3a1	99	894	943	795	52.5897	48.1177	48.2558	49.6544	5	0	2	0	10	1	5	2	9	71.5483	35.9944	49.2297	0.870845	-0.306972	0.609478	0.391117
NM_199239	Sema6d	54	3147	5627	3093	15.8391	13.9628	16.5782	15.46	12	0	10	1	36	2	12	9	34	44.1365	41.6328	47.8025	0.869505	0.60245	1.43093	0.967627
NM_007747	Cox5a	96	537	693	441	5.38867	4.2479	3.04869	4.22842	1	0	0	0	1	0	1	0	1	25.7963	1	9.86082	0.867567	-4.00003	0.113465	-1.00633
NM_007602	Capn5	261	2184	4498	1923	14.1802	13.157	12.6821	13.3398	8	1	0	0	11	0	7	0	11	41.4109	1	24.8751	0.865483	-4.68877	0.597755	-1.07518
NM_001146027	Rnf44	393	1449	3799	1056	42.3337	37.6488	37.6031	39.1952	6	0	7	1	12	2	6	6	10	64.6374	81.2943	41.1801	0.865306	1.0102	0.527022	0.800843
NM_009717	Neurod6	321	1335	2154	1014	149.374	155.752	142.147	149.091	10	0	10	0	17	0	10	10	17	112.191	141.102	72.9059	0.864365	1.00483	0.361964	0.743718
NM_001271727	Trim2	503	2738	7396	2235	155.783	171.974	168.1	165.286	25	2	25	3	80	0	23	22	80	117.07	140.837	155.655	0.864308	0.940297	1.37987	1.06149
NM_001146349	Rnf217	541	2089	2860	1548	3.11631	3.22987	2.38664	2.91094	3	0	0	0	3	0	3	0	3	22.0469	1	8.42756	0.863549	-3.77621	0.163294	-0.916457
NM_001197322	Foxp1	153	1884	6632	1731	37.9816	41.3571	43.5948	40.9778	12	2	9	0	31	0	10	9	31	65.7203	74.3906	77.8782	0.862761	0.855505	1.41336	1.04388
NM_010123	Eif3a	176	4211	5176	4035	36.6605	38.027	32.2463	35.6446	25	3	19	1	45	1	22	18	44	62.0262	63.8266	47.4199	0.862425	0.718128	0.80087	0.793808
NM_015822	Fbxl3	349	1636	4265	1287	37.6266	32.8212	35.8951	35.4476	7	0	6	0	14	0	7	6	14	61.8751	66.703	47.3043	0.862208	0.785044	0.801452	0.816235
NM_001159662	Ppp1r16b	214	1921	6392	1707	37.2733	29.1571	32.2139	32.8815	10	1	12	5	27	1	9	7	26	59.9798	58.6728	66.2356	0.862126	0.645034	1.34272	0.949961
NM_053167	Trim9	446	2813	4669	2367	106.909	101.119	100.943	102.99	25	5	26	3	63	4	20	23	59	96.1232	139.028	108.394	0.861893	1.20522	1.20802	1.09171
NM_153125	Sec16a	211	7285	8739	7074	14.8137	14.3338	16.0864	15.078	31	4	41	7	123	2	27	34	121	43.4205	68.768	74.3827	0.860828	1.34147	2.08733	1.42988
NM_026065	Mrpl42	111	540	666	429	5.00903	5.79186	2.92827	4.57639	1	0	1	0	0	0	1	1	0	26.5179	33.3515	1	0.860223	1.01224	-3.24679	-0.458108
NM_001080817	Prdm10	0	3408	3408	3408	1.62172	0.714859	2.14593	1.49417	5	0	3	0	4	0	5	3	4	16.6904	12.5949	5.10401	0.859569	0.278339	-0.0664299	0.357159
NM_145412	Chtf8	126	492	2931	366	40.5669	36.1571	31.3283	36.0174	2	0	0	1	8	0	2	-1	8	62.1649	1	95.0518	0.859443	-5.28419	1.79639	-0.876121
NM_009211	Smarcc1	93	3408	5673	3315	8.46092	7.67633	9.53971	8.55898	12	2	8	1	28	0	10	7	28	34.3173	30.2125	36.7304	0.858959	0.49433	1.48858	0.947291
NM_009191	Clpb	43	2077	4492	2034	5.27619	5.5591	4.81189	5.21573	5	0	0	0	4	0	5	0	4	27.965	1	8.55186	0.858924	-4.12583	-0.247372	-1.17142
NM_001024927	Pitpnm3	214	3139	6666	2925	8.93345	8.43633	9.58144	8.98374	9	0	6	2	21	0	9	4	21	35.0036	19.5662	31.2209	0.858654	-0.161488	1.21826	0.638475
NM_025888	Kctd20	147	1407	2400	1260	17.4269	15.2688	17.1999	16.6319	5	0	2	0	4	0	5	2	4	45.1436	22.7108	13.8051	0.858498	-0.315691	-0.415047	0.0425865
NM_175124	Lrrc28	128	1232	2928	1104	7.29524	6.79507	5.88354	6.65795	3	0	0	0	2	0	3	0	2	30.9135	1	7.87794	0.857997	-4.27218	-0.546542	-1.32024
NM_016891	Ppp2r1a	52	1822	2256	1770	111.479	108.934	92.9296	104.448	15	0	17	1	47	1	15	16	46	96.4083	129.336	113.015	0.85779	1.09254	1.25785	1.06939
NM_009469	Ulk1	357	3513	5196	3156	16.6929	14.8866	13.512	15.0305	13	1	16	2	71	1	12	14	70	43.2554	63.4693	96.4523	0.857213	1.22768	2.46452	1.51647
NM_175211	Ralgps1	289	2047	6308	1758	29.7974	29.2879	33.5446	30.8767	10	1	7	0	20	1	9	7	19	58.2398	56.9707	46.9987	0.857157	0.640274	0.894315	0.797249
NM_207239	Gtf3c1	11	6317	6869	6306	24.2034	23.3197	24.0383	23.8538	33	4	38	2	103	5	29	36	98	52.3167	81.681	67.5808	0.856264	1.31475	1.60937	1.26013
NM_009282	Stag1	247	4024	6010	3777	11.2258	10.0159	14.2508	11.8308	13	0	9	2	17	0	13	7	17	39.1555	26.517	19.5728	0.856248	0.112033	0.34078	0.436354
NM_171824	Pgbd5	152	1382	2824	1230	155.774	147.053	139.442	147.423	13	1	13	0	23	0	12	13	23	110.987	151.221	81.3157	0.855507	1.11148	0.527794	0.831595
NM_153534	Adcy2	246	3534	4211	3288	23.4827	30.277	28.4051	27.3883	17	1	11	3	42	2	16	8	40	55.3585	34.8121	52.9029	0.855427	0.00151168	1.1538	0.670247
NM_024414	Stx1b	242	1109	1574	867	26.8253	24.3134	21.1667	24.1018	4	0	5	0	15	0	4	5	15	52.4852	82.5132	75.2356	0.854739	1.32318	1.75651	1.31147
NM_001081097	Grik3	0	2760	8842	2760	10.4121	10.0913	10.7341	10.4125	9	0	1	1	16	1	9	0	15	37.0962	1	23.6338	0.854435	-4.54026	0.707327	-0.992832
NM_198967	Tmtc1	153	2982	8346	2829	15.9826	14.8993	17.0386	15.9735	14	3	15	2	51	0	11	13	51	44.234	65.7481	78.3951	0.853211	1.24209	2.12041	1.40524
NM_001177616	Arpp21	379	2749	3423	2370	35.5797	35.1119	39.5496	36.7471	15	2	19	1	60	1	13	18	59	62.401	108.667	108.257	0.852956	1.46755	1.96921	1.42991
NM_001033481	Myrf	144	3483	5597	3339	3.14031	2.46657	1.80028	2.46905	7	1	2	3	19	0	6	-1	19	20.4424	1	24.7451	0.852689	-3.67752	1.83914	-0.328561
NM_173784	Ubtd2	105	810	3032	705	18.7867	20.9582	19.9396	19.8948	3	0	1	0	6	0	3	1	6	48.4093	20.2947	37.0095	0.852467	-0.585351	0.875014	0.38071
NM_001039558	Smco3	108	786	2052	678	1.52868	1.08831	1.98	1.53233	1	0	0	0	1	0	1	0	1	16.779	1	6.41389	0.852175	-3.39155	0.244467	-0.764968
NM_029888	Zfp142	499	5722	6174	5223	12.4357	11.2131	12.2666	11.9718	18	0	11	3	36	0	18	8	36	39.2057	21.9151	29.9733	0.851034	-0.17006	0.946834	0.542603
NM_026545	Psmd8	28	1090	1513	1062	27.1828	23.6163	25.6722	25.4904	5	0	1	1	7	1	5	0	6	53.5602	1	24.5685	0.850592	-5.07696	0.100429	-1.37531
NM_001103179	Brwd1	126	6906	7547	6780	13.4523	11.7691	13.1359	12.7857	28	4	16	5	55	2	24	11	53	40.2696	23.2132	33.9936	0.850452	-0.126466	1.07972	0.601236
NM_001001187	Zfp738	74	2456	4504	2382	9.69515	10.9308	13.1704	11.2654	8	0	1	1	8	1	8	0	7	38.2071	1	12.7793	0.850069	-4.58745	-0.238005	-1.32513
NM_001166414	Rfx3	162	2412	9146	2250	39.3877	38.7794	47.462	41.8764	13	0	7	3	34	1	13	4	33	65.729	25.4361	63.7798	0.850023	-0.705742	1.10918	0.417821
NM_019696	Cpxm1	123	2292	2421	2169	1.97438	1.38366	0.604159	1.32073	3	0	3	0	3	0	3	3	3	15.7347	19.7895	6.01469	0.848056	1.0042	0.261781	0.70468
NM_178279	Pxk	102	1650	2840	1548	10.6069	9.72209	10.5294	10.2861	5	0	3	0	12	0	5	3	12	36.7448	27.7283	33.7102	0.847981	0.260349	1.2287	0.779011
NM_009304	Syngr2	38	713	1524	675	1.53556	1.33215	1.81287	1.56019	1	0	0	0	0	0	1	0	0	16.8536	1	1	0.84783	-3.40235	-2.45007	-1.6682
NM_001177982	Pde4b	104	1559	3482	1455	19.3331	17.7832	19.2297	18.782	7	1	6	2	16	1	6	4	15	46.9121	39.3341	44.8311	0.841458	0.403832	1.19424	0.813175
NM_178115	Edrf1	138	3861	5338	3723	6.65065	5.62888	7.70275	6.66076	10	0	4	1	11	0	10	3	11	30.5565	11.5292	12.8485	0.840986	-0.745204	0.158851	0.0848778
NM_001081212	Irs2	0	3966	4015	3966	15.6505	12.4138	10.6862	12.9168	16	2	14	0	50	0	14	14	50	40.158	50.5066	54.8238	0.840365	0.988944	1.76171	1.19701
NM_027968	Fbxo30	187	2428	4977	2241	1.00043	1.30533	1.40412	1.23663	3	0	0	0	7	1	3	0	6	15.2292	1	11.6429	0.840169	-3.26302	1.26338	-0.386488
NM_028658	Ppp1r21	138	2481	3135	2343	16.9306	15.7041	14.93	15.8549	10	1	9	2	25	0	9	7	25	43.6985	42.7463	46.4001	0.840083	0.625411	1.3693	0.944931
NM_133857	Usp53	683	3893	4014	3210	2.98946	2.02312	3.32002	2.77753	6	0	8	0	11	0	6	8	11	21.2639	35.658	14.9018	0.839348	1.40806	1.02033	1.08925
NM_026530	Mpnd	49	1513	1701	1464	8.16682	8.23538	4.49053	6.96424	4	0	7	0	11	0	4	7	11	31.0824	68.4116	32.6741	0.839046	1.79703	1.47241	1.3695
NM_176830	P3h4	163	1495	1869	1332	1.51851	1.3035	2.08692	1.63631	2	0	0	0	1	0	2	0	1	17.0813	1	3.26473	0.838799	-3.4309	-0.778378	-1.12349
NM_001003909	Ankib1	611	3869	6626	3258	9.73883	9.51369	8.51102	9.25452	13	3	22	3	44	1	10	19	43	34.9177	83.4401	57.3943	0.837404	1.91309	2.07467	1.60839
NM_001081064	Pdzd2	0	8391	13413	8391	12.5434	10.9736	7.60917	10.3754	32	5	28	3	96	5	27	25	91	36.6055	42.6284	47.1606	0.837351	0.875625	1.7067	1.13989
NM_010611	Kcnq2	197	2810	8284	2613	149.5	142.45	143.489	145.146	26	1	22	3	66	0	25	19	66	108.842	104.037	109.839	0.83663	0.581252	0.9731	0.796994
NM_009955	Dpysl2	232	1951	4432	1719	93.1115	97.9828	104.324	98.4729	22	8	22	6	80	3	14	16	77	92.6506	133.173	194.79	0.835549	1.17003	2.08687	1.36415
NM_133826	Atp6v1h	227	1679	2063	1452	20.5151	19.2392	17.4887	19.081	7	1	2	0	10	0	6	2	10	47.009	19.7077	29.9492	0.835021	-0.602658	0.600558	0.27764
NM_016738	Rpl13	102	738	780	636	50.5573	51.1454	56.6732	52.792	6	2	5	0	17	0	4	5	17	71.5483	112.483	116.237	0.834318	1.30015	1.80358	1.31268
NM_001164804	Coro2a	113	1688	3887	1575	6.44328	5.19694	6.06257	5.90093	5	1	2	0	11	0	4	2	11	28.8919	18.1686	30.3713	0.832379	-0.0164427	1.48964	0.768526
NM_008845	Pip4k2a	126	1344	3471	1218	19.9968	18.6584	17.9328	18.8627	5	0	4	0	10	0	5	4	10	46.7002	46.9878	35.703	0.832373	0.657767	0.862604	0.784248
NM_016962	Spast	50	1892	4693	1842	21.5377	20.7433	22.6134	21.6315	9	1	7	0	16	1	8	7	15	49.4079	54.3727	35.4122	0.832036	0.786258	0.749404	0.789233
NM_145484	Zfp758	323	1979	2974	1656	8.38784	8.2942	10.2735	8.98519	6	1	8	2	8	0	5	6	8	34.3484	51.8398	21.0078	0.831294	1.24411	0.646555	0.90732
NM_172712	Uba6	5	3167	5097	3162	3.64374	3.24625	5.86687	4.25229	8	1	12	1	26	0	7	11	26	25.1845	49.7741	35.7572	0.829579	1.63392	1.96775	1.47708
NM_172662	Gtdc1	187	1525	2564	1338	14.8947	14.0546	16.3533	15.1009	6	1	8	1	29	0	5	7	29	42.5119	74.8539	94.2526	0.829413	1.4629	2.42778	1.57336
NM_001033536	Rfx7	580	4960	8000	4380	10.2072	9.40237	11.4576	10.3557	15	1	14	1	51	1	14	13	50	36.3622	42.466	49.6418	0.828863	0.871259	1.78208	1.16073
NM_016876	Eif3g	27	990	1068	963	3.31009	6.27309	1.36954	3.65091	2	0	0	0	6	0	2	0	6	23.6265	1	27.0942	0.828355	-3.91199	1.6804	-0.467748
NM_001143790	Ctc1	222	3858	4164	3636	3.38399	2.80347	2.96624	3.05123	8	1	15	1	16	0	7	14	16	21.9013	55.0905	19.1358	0.825933	1.9793	1.31153	1.37226
NM_198109	Ssh1	25	3154	3174	3129	4.84735	5.50086	2.86738	4.4052	7	0	1	0	6	0	7	1	6	25.4501	4.57264	8.33868	0.823654	-1.83155	-0.158747	-0.388882
NM_146142	Tdrd7	146	3407	3656	3261	8.21229	7.19122	6.57899	7.3275	10	1	9	1	29	1	9	8	28	31.397	35.1004	37.3387	0.823261	0.803795	1.62729	1.08478
NM_033581	Pcdhgc3	138	2943	4687	2805	6.31022	5.71766	5.20116	5.74301	8	1	6	1	24	0	7	5	24	28.3897	25.5041	37.2074	0.823257	0.489098	1.80261	1.03832
NM_026557	Rchy1	349	1135	2029	786	17.0306	15.209	16.0196	16.0864	3	0	0	0	0	0	3	0	0	43.4205	1	1	0.822234	-4.80101	-4.17749	-2.71875
NM_001199296	Acly	229	3535	4427	3306	11.9108	11.0751	11.674	11.5533	11	0	9	1	36	0	11	8	36	37.8518	34.6226	47.3534	0.821546	0.511063	1.63297	0.988527
NM_001195004	Kat7	197	1943	5876	1746	13.2528	12.7665	11.4781	12.4991	7	1	10	1	20	0	6	9	20	39.0934	73.7515	49.8124	0.8212	1.55485	1.64775	1.34127
NM_013807	Plk3	99	2046	2378	1947	1.86351	2.09167	1.4352	1.79679	3	0	2	0	4	0	3	2	4	17.5288	14.6973	8.93399	0.820328	0.390489	0.604695	0.605171
NM_001256431	Agap3	30	1218	2074	1188	71.638	62.3548	57.4379	63.8102	10	2	13	2	48	1	8	11	47	76.6072	132.48	172.041	0.819879	1.42259	2.22893	1.49047
NM_015740	Bloc1s1	89	467	550	378	6.97078	5.90604	7.09173	6.65618	1	0	1	0	1	0	1	1	1	30.0957	37.8513	11.5043	0.819475	0.970253	-6.37945e-05	0.596555
NM_010481	Hspa9	101	2141	3043	2040	30.4835	30.9234	27.6116	29.6728	10	0	4	2	18	0	10	2	18	55.7656	14.0272	38.3702	0.818235	-1.35787	0.631122	0.030494
NM_001122733	Kit	65	3005	5182	2940	15.633	14.0845	16.716	15.4778	11	0	2	0	13	0	11	2	13	42.5639	9.73319	19.2286	0.816479	-1.49497	0.116242	-0.187418
NM_001082975	Sdr39u1	27	909	1227	882	26.0927	24.5709	23.5765	24.7467	4	0	0	0	0	0	4	0	0	51.5926	1	1	0.81425	-5.05921	-4.49638	-2.91378
NM_201411	Flrt1	692	2717	5872	2025	10.5654	6.984	9.07803	8.8758	6	0	1	0	16	1	6	1	15	33.7072	7.06557	32.212	0.811412	-1.62373	1.2723	0.153327
NM_001164367	Rab11fip2	218	1331	5363	1113	25.1138	22.2781	25.6975	24.3631	6	1	7	0	10	0	5	7	10	51.1059	89.9861	39.0712	0.809887	1.44179	0.803213	1.0183
NM_134129	Prpf19	219	1734	6161	1515	10.5951	12.3572	11.7649	11.5724	5	0	4	0	13	2	5	4	11	37.5451	37.7763	31.5741	0.808828	0.635842	1.04703	0.830565
NM_172614	Tmem44	79	1381	4241	1302	8.99319	8.25771	11.9561	9.73567	4	0	3	1	8	0	4	2	8	34.9498	21.9782	26.7196	0.808517	-0.0419663	0.934137	0.566896
NM_173776	Maml2	278	1523	4452	1245	14.584	23.8954	17.4492	18.6429	5	0	2	0	7	0	5	2	7	45.6875	22.9844	24.4501	0.807729	-0.366838	0.325078	0.255323
NM_029688	Srxn1	160	628	2812	468	23.9572	17.6524	23.4647	21.6914	2	0	1	0	0	0	2	1	0	48.6161	30.5722	1	0.807079	-0.0460631	-4.39882	-1.2126
NM_028074	Ddx42	248	3038	4012	2790	32.4413	32.8668	30.7457	32.0179	14	0	6	1	21	0	14	5	21	57.0848	25.6412	32.7315	0.80662	-0.533241	0.345502	0.206294
NM_027268	Scrn1	144	1389	1777	1245	10.8717	10.1681	11.615	10.885	5	1	4	0	13	0	4	4	13	36.55	45.9688	45.4073	0.80658	0.955726	1.61655	1.12628
NM_001081184	Focad	78	5475	5796	5397	4.65612	5.46431	6.16876	5.42973	15	2	13	1	49	0	13	12	49	27.4023	31.8128	39.4816	0.805625	0.841602	1.92973	1.19232
NM_010250	Gabra1	780	2148	4688	1368	103.587	97.0928	100.708	100.462	13	2	15	1	31	3	11	14	28	91.4751	146.425	89.0068	0.805203	1.2949	0.942127	1.01408
NM_080428	Fbxw7	162	2052	3709	1890	91.058	100.798	100.561	97.4725	16	1	16	2	45	0	15	14	45	90.2871	105.984	103.539	0.804355	0.846692	1.18268	0.944575
NM_001134480	Plcxd2	557	1580	7337	1023	3.35244	2.58721	3.92065	3.28677	2	0	2	0	6	0	2	2	6	22.2408	27.9722	25.5051	0.803795	0.956915	1.67099	1.1439
NM_194348	Atg2a	128	5873	6340	5745	7.20952	8.35777	7.66453	7.74394	17	1	10	4	43	0	16	6	43	31.683	14.9429	32.5484	0.80339	-0.461371	1.38829	0.576768
NM_009103	Rrm1	330	2709	3997	2379	1.98069	2.84441	2.03301	2.28604	4	0	0	0	5	0	4	0	5	19.1277	1	9.1396	0.802699	-3.63135	0.459225	-0.789808
NM_054095	Necab2	336	1506	1971	1170	13.1615	12.3604	12.7805	12.7675	5	1	3	0	8	1	4	3	7	38.8929	36.6866	26.0174	0.801119	0.534699	0.694994	0.676937
NM_183188	Rbfox1	164	1418	4085	1254	225.018	206.126	240.576	223.906	15	1	7	0	24	1	14	7	23	127.007	79.868	79.7594	0.800875	-0.0600123	0.190495	0.310453
NM_029988	Pigh	51	618	2353	567	2.94135	2.15703	2.62461	2.57433	1	0	0	0	0	0	1	0	0	20.0638	1	1	0.800829	-3.70255	-2.82084	-1.90752
NM_001145919	Ythdf3	314	2072	5131	1758	36.4677	31.9309	33.9544	34.1176	10	1	5	1	30	0	9	4	30	58.2398	32.5547	74.2085	0.797653	-0.226917	1.47938	0.683371
NM_029103	Manf	40	580	2206	540	14.0616	17.5319	15.1763	15.5899	2	0	0	0	1	0	2	0	1	42.134	1	8.053	0.797531	-4.78221	-1.14475	-1.70981
NM_007873	Doc2b	167	1406	5068	1239	61.8166	60.5295	57.2407	59.8623	10	2	8	1	23	0	8	7	23	73.4539	80.835	80.725	0.797312	0.748157	1.18455	0.910005
NM_133774	Stard4	145	820	2985	675	1.91826	1.59832	1.57891	1.69849	1	0	0	0	0	0	1	0	0	16.8536	1	1	0.797198	-3.45326	-2.51296	-1.72301
NM_001081130	Ogdhl	168	3258	3449	3090	3.81122	4.85624	5.60735	4.75827	8	1	2	1	29	0	7	1	29	25.7713	4.63035	40.8123	0.795787	-1.85968	2.07528	0.337132
NM_009366	Tsc22d1	207	639	1730	432	245.244	240.162	254.581	246.662	5	0	3	0	18	0	5	3	18	131.669	99.3596	181.193	0.79518	0.197005	1.30263	0.764938
NM_134137	Lars	105	3642	3806	3537	4.2125	4.34738	5.67919	4.74636	8	0	6	0	15	0	8	6	15	25.7307	24.2711	18.442	0.795006	0.531869	0.93113	0.752668
NM_138589	Ubfd1	85	1192	4831	1107	16.4184	14.0992	13.7591	14.7589	4	0	1	0	2	0	4	1	2	41.1063	12.9248	7.85659	0.794563	-1.0573	-1.13982	-0.46752
NM_025323	Sf3b6	182	560	1116	378	6.15699	6.09424	8.59194	6.94772	1	0	0	0	0	1	1	0	-1	30.0957	1	1	0.793919	-4.29772	-3.5559	-2.35323
NM_028731	Esyt2	121	2659	5541	2538	13.0926	12.8605	16.4836	14.1456	11	2	5	3	18	0	9	2	18	40.341	11.2749	30.8413	0.792756	-1.22889	0.864492	0.142785
NM_018868	Nop58	176	1787	1976	1611	3.20015	4.21246	1.56268	2.99176	3	0	2	0	2	1	3	2	1	21.1847	17.7626	2.69933	0.789671	0.35814	-1.4995	-0.117229
NM_026559	Txndc17	70	442	1446	372	7.29997	8.91547	5.6196	7.27835	1	0	0	0	0	0	1	0	0	30.5811	1	1	0.789288	-4.32558	-3.59032	-2.37554
NM_146129	Pcif1	311	2432	2752	2121	5.78968	4.79517	5.31493	5.29993	5	0	3	0	15	1	5	3	14	26.818	20.2373	28.7038	0.788951	0.20352	1.4877	0.826724
NM_001113417	Thrb	189	1575	5997	1386	9.61452	7.88789	8.45521	8.65254	4	0	2	0	4	0	4	2	4	32.8317	20.6462	12.5501	0.788632	-0.0614605	-0.0687384	0.219478
NM_001166531	Sfmbt1	278	2870	7743	2592	7.34362	7.87906	6.88443	7.36904	7	0	2	1	6	1	7	1	5	30.7227	5.51998	8.38854	0.78857	-1.86834	-0.53107	-0.536948
NM_181588	Cmbl	47	785	1041	738	2.20019	1.6577	0.312236	1.39004	1	0	1	0	1	0	1	1	1	15.4149	19.3872	5.89244	0.787938	0.943913	0.194285	0.642045
NM_011842	Mta2	435	2442	3087	2007	13.7906	14.3699	12.951	13.7038	7	0	1	0	5	0	7	1	5	39.6777	7.12894	10.8336	0.78775	-1.87122	-0.621364	-0.568279
NM_199065	Slitrk1	962	3053	4252	2091	47.8123	40.9191	48.618	45.7832	12	0	13	1	18	0	12	12	18	65.2865	82.1107	37.4343	0.787104	0.931483	0.274409	0.664332
NM_030678	Gys1	214	2431	3681	2217	5.53236	4.08136	4.72413	4.77928	5	0	1	0	2	0	5	1	2	25.6567	6.45367	3.92298	0.786731	-1.38332	-1.30696	-0.634517
NM_008552	Mas1	945	1920	4639	975	18.7616	21.6193	20.6345	20.3385	4	0	0	0	1	0	4	0	1	46.6715	1	4.46012	0.786578	-4.94161	-2.19406	-2.11636
NM_029665	Ipo11	162	3090	4282	2928	17.1514	14.7453	17.4209	16.4392	13	2	15	1	34	1	11	14	33	42.7384	68.4116	49.0111	0.786457	1.28216	1.42148	1.16337
NM_172458	Zfp871	147	1995	10851	1848	32.0149	27.2976	33.3245	30.879	9	0	3	1	10	1	9	2	9	55.4035	15.4846	21.1783	0.785082	-1.23916	-0.255774	-0.236616
NM_178615	Rgmb	430	1741	2633	1311	18.797	17.0019	15.4927	17.0972	5	0	3	0	13	0	5	3	13	43.3874	32.7409	43.1213	0.784804	0.195487	1.20772	0.729337
NM_001165956	Phc3	28	2884	10925	2856	14.5614	12.7108	14.4445	13.9056	11	1	5	0	24	1	10	5	23	39.8325	25.0487	35.0204	0.784656	-0.0670104	1.06049	0.592713
NM_011421	Smpd1	172	2056	2412	1884	41.9469	39.6445	32.6116	38.0676	12	2	5	0	19	2	10	5	17	60.3831	37.9718	39.2391	0.784484	-0.0705239	0.478978	0.397646
NM_011520	Sdc3	134	1463	4972	1329	56.611	52.0617	46.2845	51.6524	8	0	4	1	12	1	8	3	11	68.4796	32.2975	35.9931	0.784085	-0.486973	0.128463	0.141858
NM_001039347	Kcnd3	465	2376	7169	1911	22.2946	19.9933	22.1936	21.4938	8	0	1	1	8	0	8	0	8	47.624	1	18.2046	0.782786	-4.97473	-0.205816	-1.46592
NM_001122893	Fyn	513	2127	3536	1614	33.3444	33.1286	30.794	32.4223	9	1	11	1	27	0	8	10	27	56.3875	88.648	72.7464	0.781407	1.24886	1.4884	1.17289
NM_011287	Rpl10a	143	797	830	654	28.255	25.1941	27.217	26.8887	3	0	0	0	6	0	3	0	6	52.1843	1	39.8956	0.781212	-5.10897	0.760312	-1.18915
NM_001081279	Mfhas1	575	3722	6408	3147	13.6289	12.7046	15.4961	13.9432	12	1	14	2	38	0	11	12	38	39.7642	54.5578	52.5096	0.780567	1.05442	1.64288	1.15929
NM_001003916	Zc4h2	205	880	2225	675	10.5401	11.1319	6.42771	9.36656	2	0	0	0	1	0	2	0	1	33.7072	1	6.4424	0.779329	-4.4768	-1.08948	-1.59565
NM_010629	Kifap3	288	2607	4010	2319	61.55	62.3236	62.049	61.9742	18	3	15	7	49	2	15	8	47	73.5846	49.3585	88.135	0.779207	0.0156911	1.28558	0.693491
NM_153560	Fam102a	728	1907	4217	1179	25.6336	21.1108	20.6569	22.4671	5	0	6	2	15	0	5	4	15	48.245	48.5421	55.326	0.775077	0.599891	1.36505	0.913339
NM_010360	Gstm5	100	775	911	675	9.07283	9.13702	10.1686	9.45948	2	0	1	0	7	0	2	1	7	33.7072	21.1967	45.0968	0.773444	-0.0769437	1.71057	0.802357
NM_148930	Rbm5	167	2615	3087	2448	28.8393	32.5542	34.6412	32.0116	12	0	6	3	18	0	12	3	18	55.7656	17.5341	31.9751	0.773007	-1.08143	0.311919	0.00116669
NM_011101	Prkca	221	2240	8369	2019	34.0311	32.7491	32.061	32.9471	10	0	9	1	27	1	10	8	26	56.3456	56.6926	56.0001	0.770764	0.594307	1.09907	0.82138
NM_001293689	Slc6a17	500	2684	6317	2184	100.607	102.555	92.5408	98.5675	19	2	5	2	29	0	17	3	29	88.5508	19.6536	57.7427	0.769681	-1.59098	0.331946	-0.163119
NM_178347	Cdc23	29	1823	4134	1794	12.779	14.1682	11.3614	12.7695	6	0	1	0	13	0	6	1	13	38.0474	7.97536	31.5117	0.769314	-1.66703	0.971288	0.0245233
NM_001167883	Ankrd50	928	1759	4915	831	6.2505	4.79152	6.24945	5.76383	2	0	2	0	4	0	2	2	4	27.3795	34.4351	20.932	0.768825	0.920081	0.970047	0.886318
NM_008143	Rack1	104	1058	1254	954	12.1897	9.95673	10.8864	11.011	3	0	4	1	10	0	3	3	10	35.7741	44.993	45.583	0.768765	0.917873	1.6136	1.10008
NM_144931	Nae1	73	1678	1808	1605	2.89164	4.15473	2.33711	3.12782	3	0	1	0	7	0	3	1	7	21.2639	8.91451	18.9659	0.76854	-0.663138	1.28031	0.461905
NM_025483	Senp7	135	3249	4908	3114	8.99854	8.14893	9.83457	8.99402	11	2	9	2	29	0	9	7	29	32.8791	32.1627	40.4977	0.76764	0.554849	1.59274	0.971744
NM_010601	Kcnh3	0	3288	3583	3288	42.6207	44.8763	39.6432	42.3801	19	1	14	3	47	4	18	11	43	62.2783	47.8667	56.8706	0.765095	0.199237	0.934917	0.633083
NM_017377	B4galt2	469	1579	2432	1110	27.1068	28.2993	23.9902	26.4654	5	0	2	1	15	0	5	1	15	51.244	12.8899	58.7651	0.764439	-1.41129	1.33079	0.22798
NM_001136104	Abl2	262	3499	10402	3237	20.4632	18.8441	21.014	20.1071	14	1	7	1	49	0	13	6	49	45.6875	26.5205	65.8271	0.762656	-0.205711	1.69794	0.751629
NM_001015507	Vprbp	124	4384	5392	4260	6.54711	7.24803	6.93237	6.90917	11	0	8	1	24	0	11	7	24	29.3751	23.5105	24.4993	0.762273	0.260851	1.06289	0.695336
NM_001159612	Lrrc57	266	986	1965	720	22.2477	21.0252	22.7444	22.0058	3	0	0	1	0	0	3	-1	0	47.4007	1	1	0.761975	-4.98884	-4.40947	-2.87878
NM_144517	Tbc1d19	133	1714	2688	1581	6.44619	5.81568	7.49715	6.58634	4	0	2	0	6	0	4	2	6	28.7822	18.0997	16.5033	0.761384	-0.0878025	0.528329	0.400637
NM_001256521	C330006A16Rik	479	899	2474	420	31.4567	32.6194	27.3273	30.4678	2	0	0	0	0	0	2	0	0	54.1723	1	1	0.760653	-5.18388	-4.65037	-3.02453
NM_183191	Plch1	0	5049	6248	5049	2.69357	1.73841	1.97686	2.13628	9	1	8	0	11	0	8	8	11	18.0252	22.6703	9.47412	0.757448	0.911998	0.56125	0.743565
NM_001159967	Ralgps2	221	1916	6914	1695	14.5831	15.7389	14.5736	14.9652	8	2	4	1	10	0	6	3	10	40.2696	25.3235	25.6556	0.756621	-0.0952889	0.5572	0.406177
NM_018798	Ubqln2	222	2139	3331	1917	132.109	106.782	118.998	119.296	19	3	16	3	50	1	16	13	49	94.9498	97.0273	111.154	0.756553	0.598195	1.13548	0.830077
NM_172755	Sugp2	442	3646	3881	3204	42.5426	41.1167	36.0129	39.8907	17	0	13	1	49	1	17	12	48	60.3605	53.5872	65.1479	0.756056	0.398392	1.17577	0.776739
NM_001167777	Asxl3	404	7019	11697	6615	3.9375	3.93127	5.08523	4.318	14	0	8	3	30	0	14	5	30	24.0766	10.8147	19.7216	0.755534	-0.577679	1.09794	0.425266
NM_030197	Cacul1	305	1439	5790	1134	15.8145	14.4989	14.2871	14.8668	4	0	3	0	17	1	4	3	16	40.1276	37.8513	61.3562	0.755454	0.488528	1.82002	1.02133
NM_008166	Grid1	92	3122	3428	3030	13.6679	13.0589	11.2834	12.6701	11	1	5	2	36	0	10	3	36	37.5451	14.1661	51.6668	0.754804	-0.83352	1.69042	0.537236
NM_001081300	Tshz1	1159	4414	5814	3255	7.12527	6.49497	5.0595	6.22658	8	0	8	3	24	0	8	5	24	27.9599	21.9782	32.0636	0.75305	0.225978	1.5281	0.835708
NM_011544	Tcf12	266	2387	4707	2121	13.1804	12.3141	12.6369	12.7104	8	1	1	0	13	1	7	1	12	37.5451	6.74578	24.6032	0.752907	-1.90582	0.61768	-0.178409
NM_022021	Cables1	532	2239	3265	1707	2.684	2.5805	3.03634	2.76695	3	0	0	0	5	0	3	0	5	19.9933	1	12.7376	0.752734	-3.7458	0.796762	-0.732102
NM_029365	Med25	2	2240	2271	2238	5.34966	4.06755	5.43876	4.95199	5	0	7	0	16	0	5	7	16	25.4159	44.7518	31.0893	0.751967	1.38915	1.65316	1.26476
NM_178704	Dpy19l3	239	2390	7671	2151	16.9801	15.1385	18.9404	17.0197	8	0	2	1	8	0	8	1	8	42.3103	6.65169	16.1734	0.751246	-2.10109	-0.203694	-0.517846
NM_009025	Rasa3	140	2645	4118	2505	15.1986	16.7376	15.1153	15.6838	10	1	6	0	19	0	9	6	19	40.8725	34.2702	32.9835	0.750098	0.313069	0.884949	0.649372
NM_010358	Gstm1	198	855	1294	657	12.7364	11.5317	7.28446	10.5175	2	0	1	1	3	0	2	0	3	34.6307	1	19.8567	0.749232	-4.54627	0.448673	-1.11612
NM_001170556	Prkag2	156	1137	2258	981	53.2753	59.926	57.9396	57.047	6	0	6	1	16	1	6	5	15	69.5791	72.9245	66.4927	0.747843	0.628459	0.94039	0.772231
NM_001161817	Myo1b	227	3638	5053	3411	2.02988	2.31024	4.05252	2.79755	6	0	2	0	1	1	6	2	0	20.0109	8.38921	1	0.747446	-0.683862	-2.8824	-0.939607
NM_133910	Tbc1d14	60	2145	4590	2085	34.1379	31.603	29.3879	31.7096	11	1	16	2	34	0	10	14	34	54.562	96.0715	70.9128	0.747179	1.3782	1.46803	1.1978
NM_177078	Adrbk2	59	2126	6561	2067	18.2667	18.628	19.7668	18.8871	9	1	10	2	23	1	8	8	22	44.0297	55.3761	46.2843	0.746648	0.893966	1.23612	0.958913
NM_001103166	Pcbp2	245	1241	2775	996	4.70101	3.25564	3.63105	3.86257	3	1	6	2	16	0	2	4	16	22.8437	57.461	69.8574	0.746149	1.89873	3.0051	1.88333
NM_178874	Tmcc2	203	2324	3515	2121	64.6649	53.0509	54.8356	57.5172	13	0	18	1	32	0	13	17	32	69.7267	114.678	65.6086	0.746008	1.27665	0.915003	0.979221
NM_023423	Akirin1	135	711	2370	576	38.3834	35.9782	42.1726	38.8447	3	0	1	0	4	0	3	1	4	59.2509	24.8399	30.1988	0.74513	-0.694908	0.0862119	0.0454778
NM_027711	Iqgap2	213	4941	5771	4728	22.2943	25.6809	22.4727	23.4827	22	2	22	3	59	1	20	19	58	48.1226	57.4975	53.346	0.745055	0.817649	1.27974	0.947482
NM_001130476	Tpst1	393	1506	2054	1113	28.3621	25.9953	27.2183	27.1919	5	0	3	0	2	0	5	3	2	51.1059	38.5655	7.81423	0.744401	0.153544	-1.60004	-0.234033
NM_001033273	5031439G07Rik	170	1514	5032	1344	29.5561	24.147	26.6451	26.7827	6	0	4	1	24	0	6	3	24	50.7865	31.937	77.6539	0.744395	-0.109446	1.72407	0.786338
NM_001163425	Myeov2	43	217	438	174	52.9743	53.5361	41.5573	49.3559	1	0	0	0	0	0	1	0	0	65.3803	1	1	0.74438	-5.47306	-5.00751	-3.2454
NM_080853	Slc17a6	805	2554	4320	1749	6.00492	3.87712	6.05684	5.31296	4	0	1	0	0	0	4	1	0	26.0176	8.18055	1	0.743774	-1.1047	-3.35728	-1.2394
NM_001039198	Zfhx2	90	7779	8725	7689	53.5007	53.4367	56.4951	54.4775	47	1	32	0	115	0	46	32	115	68.0588	59.546	65.0398	0.743447	0.363688	0.942641	0.683258
NM_001033261	Zfc3h1	239	6218	6956	5979	11.9038	12.9295	15.2566	13.3633	23	3	11	0	46	1	20	11	45	38.0538	26.3231	32.7292	0.74246	0.0284291	0.992326	0.587738
NM_008517	Lta4h	114	1950	2066	1836	2.77154	2.50581	1.80926	2.3622	3	0	2	0	9	0	3	2	9	18.5885	15.5858	21.3168	0.741912	0.311165	1.65675	0.903274
NM_011155	Ppp5c	101	1601	2070	1500	22.803	20.4491	18.6072	20.6198	6	0	3	0	8	0	6	3	8	45.5047	28.6156	23.1926	0.741863	-0.11111	0.174286	0.268346
NM_001082414	Sh3d19	233	2603	6414	2370	4.25407	4.13067	4.78891	4.39122	6	1	3	2	14	1	5	1	13	24.0004	6.03704	23.8532	0.740937	-1.42883	1.3599	0.224001
NM_138748	Ptpa	252	1224	2577	972	59.5293	63.3404	54.2991	59.0562	6	0	5	3	16	0	6	2	16	70.2233	29.4399	71.5822	0.740504	-0.700923	1.02117	0.353583
NM_026236	Wdr48	15	2046	3821	2031	14.3731	14.213	14.6739	14.42	8	1	6	0	18	0	7	6	18	39.2089	42.2682	38.5402	0.740231	0.666052	1.17177	0.85935
NM_001097623	Trerf1	639	4317	4544	3678	16.8199	16.9109	12.2676	15.3328	13	0	8	1	23	1	13	7	22	40.2094	27.2307	26.0113	0.739995	-0.00508048	0.5591	0.431338
NM_177710	Ssh2	28	4300	9040	4272	16.3199	17.5958	19.0205	17.6454	17	1	12	0	41	0	16	12	41	42.6074	40.1904	41.7354	0.739818	0.472324	1.13722	0.783121
NM_009388	Tkt	143	2015	3227	1872	7.60679	8.11577	7.65505	7.79254	5	0	7	1	21	0	5	6	21	30.3851	45.8583	48.7826	0.739315	1.15261	1.96743	1.28645
NM_001081152	Npat	105	4368	7347	4263	7.2176	7.23986	7.07854	7.17867	14	3	13	1	45	0	11	12	45	29.3544	40.2753	45.9038	0.738446	1.0145	1.94043	1.23113
NM_001290353	Zfp37	206	1868	3495	1662	7.09472	5.77983	5.34754	6.07403	4	0	3	0	7	0	4	3	7	27.3795	25.8263	18.3155	0.737575	0.473619	0.738591	0.649928
NM_027934	Rnf180	199	1927	3785	1728	1.39442	1.23368	0.472314	1.03347	2	0	0	0	5	0	2	0	5	13.1669	1	12.5828	0.737234	-3.15543	1.50826	-0.303312
NM_008244	Hgs	92	2420	2905	2328	11.398	11.5313	8.33573	10.4217	7	0	6	0	8	1	7	6	7	34.2067	36.8757	13.0757	0.736918	0.663817	-0.147282	0.417818
NM_001146046	Lrrc49	275	2336	2795	2061	8.159	11.295	9.47784	9.64396	7	1	7	0	14	0	6	7	14	33.1184	48.5951	29.5394	0.736507	1.10845	1.08588	0.976946
NM_199196	Suz12	214	2440	4373	2226	14.7336	14.1367	19.3625	16.0776	10	2	9	1	23	0	8	8	23	40.8847	51.4206	44.9318	0.735746	0.883598	1.31258	0.977309
NM_175471	Cyb5rl	359	1130	1605	771	1.20988	1.26492	1.62013	1.36498	1	0	0	0	0	0	1	0	0	14.7551	1	1	0.735676	-3.32221	-2.35111	-1.64588
NM_026070	Ccdc53	145	730	1048	585	2.89816	3.39013	1.70583	2.6647	1	0	0	0	2	0	1	0	2	19.4465	1	14.8671	0.735173	-3.72323	1.04766	-0.646798
NM_001290625	Mapkap1	147	1716	3126	1569	11.8983	11.3655	12.8414	12.0351	5	0	5	0	4	0	5	5	4	36.253	45.5952	11.0863	0.734929	0.883742	-0.491959	0.375571
NM_027937	Caskin1	187	4483	6176	4296	50.1621	48.9635	41.8928	47.0061	25	1	22	2	72	2	24	20	70	63.5541	66.6098	70.8574	0.732587	0.613845	1.17545	0.840627
NM_008468	Kpna6	87	1698	5711	1611	26.5391	25.8441	24.4162	25.5998	7	0	0	0	9	2	7	0	7	49.4309	1	18.8953	0.732294	-5.07952	-0.281521	-1.54292
NM_026030	Eif2s2	202	1198	2513	996	20.4277	22.7418	20.3068	21.1588	4	0	4	0	3	0	4	4	3	45.6875	57.461	13.0983	0.732263	0.879204	-0.66911	0.314119
NM_009682	Ap3s2	63	645	5804	582	15.5019	14.0092	14.2246	14.5786	2	0	2	0	1	0	2	2	1	39.0934	49.1677	7.47186	0.729457	0.877633	-1.20316	0.134645
NM_001038587	Adar	845	3638	5918	2793	46.022	40.5148	42.3735	42.9701	15	0	17	1	41	2	15	16	39	61.0965	81.9637	60.7219	0.729212	0.966911	1.01921	0.905112
NM_172716	Pcgf3	310	1036	3731	726	10.743	7.12828	7.75351	8.54158	2	0	1	0	1	0	2	1	1	31.3393	19.7077	5.98983	0.729212	-0.120838	-1.1263	-0.172641
NM_018763	Chst2	876	2469	6242	1593	27.9587	27.1257	24.3179	26.4675	7	0	4	4	29	2	7	0	27	49.9895	1	73.7054	0.728634	-5.09951	1.65754	-0.904443
NM_175174	Klhl5	166	2293	3408	2127	11.7904	12.927	14.7354	13.1509	7	0	5	4	28	1	7	1	27	37.4392	6.72675	55.2011	0.728521	-1.93032	1.75831	0.185504
NM_025500	Mrpl37	71	1343	1496	1272	12.7474	13.978	8.69085	11.8054	4	0	3	0	9	0	4	3	9	35.7741	33.7448	30.7685	0.727234	0.461073	0.994978	0.727762
NM_001164072	Tank	161	1403	2019	1242	13.909	11.5135	12.1547	12.5257	4	0	2	0	3	0	4	2	3	36.6382	23.0399	10.5039	0.726358	-0.124962	-0.599403	0.000664425
NM_178851	Vps39	146	2774	4347	2628	17.857	18.3078	20.1139	18.7596	10	0	11	0	25	0	10	11	25	43.2883	59.888	41.3682	0.72619	1.01103	1.07914	0.938788
NM_001290384	Arhgef9	170	1658	4696	1488	112.083	111.756	122.789	115.543	13	1	9	1	18	0	12	8	18	91.7434	76.9236	52.6043	0.726051	0.282396	0.0798435	0.362764
NM_011135	Cnot7	310	1168	2617	858	54.8903	51.3562	51.9166	52.721	5	0	4	2	6	0	5	2	6	66.2947	33.3515	30.4099	0.725097	-0.45292	-0.129876	0.0474339
NM_001005385	Gprasp1	1266	5310	5675	4044	172.387	160.788	169.736	167.637	44	6	45	7	108	1	38	38	107	106.898	134.445	115.06	0.724744	0.864817	0.933439	0.841
NM_198942	Dhx57	427	4435	4918	4008	10.3774	10.3203	10.9051	10.5342	13	1	18	1	39	3	12	17	36	34.0604	60.6867	39.0595	0.724329	1.37608	1.42354	1.17465
NM_021280	Plcg1	134	4043	4435	3909	2.9639	3.41037	2.74835	3.04087	8	1	7	3	35	1	7	4	34	20.3718	14.6409	37.8238	0.723514	0.0695366	2.29707	1.03004
NM_026375	Ahctf1	670	7402	8831	6732	10.9889	11.0579	12.9191	11.6553	24	3	18	3	57	1	21	15	56	35.4872	31.8801	36.1739	0.723243	0.386735	1.23794	0.782641
NM_021273	Ckb	124	1270	1478	1146	185.218	172.869	173.295	177.127	12	1	11	2	50	1	11	9	49	109.195	112.365	185.936	0.722595	0.572979	1.58509	0.96022
NM_001202500	Armcx4	583	7654	9014	7071	14.2403	14.4146	14.3155	14.3234	25	1	16	6	44	1	24	10	43	38.6124	20.2345	26.4447	0.72212	-0.392679	0.633357	0.320933
NM_021789	Trappc4	247	907	1168	660	11.6379	12.428	8.62685	10.8976	2	0	1	0	3	0	2	1	3	34.4733	21.6785	19.7665	0.721496	-0.129361	0.415818	0.335984
NM_009564	Zfp64	423	2454	2753	2031	6.52911	6.45269	6.84787	6.60989	5	0	2	0	7	0	5	2	7	28.0063	14.0894	14.9879	0.719832	-0.451295	0.386726	0.218421
NM_178614	Samm50	131	1541	1673	1410	1.3988	1.39554	2.42855	1.74096	2	0	0	0	5	0	2	0	5	16.1364	1	15.4206	0.71974	-3.46807	1.41555	-0.444258
NM_019663	Pias1	8	1964	3855	1956	27.537	28.8599	33.7263	30.0411	9	0	5	1	18	0	9	4	18	52.3444	29.2593	40.018	0.719541	-0.304606	0.682653	0.365863
NM_001013025	Tgfbrap1	565	3148	5538	2583	13.9628	16.0385	16.023	15.3414	9	0	5	2	17	1	9	3	16	39.6382	16.6176	26.9369	0.719019	-0.717936	0.609126	0.203403
NM_009182	St8sia3	789	1932	6280	1143	42.1719	41.9941	40.0345	41.4002	6	0	3	0	11	0	6	3	11	59.7175	37.5533	41.8502	0.718463	-0.136824	0.509788	0.363809
NM_022655	Ireb2	123	3015	5808	2892	18.8003	17.932	20.2309	18.9878	12	1	11	2	28	1	11	9	27	43.2704	44.5263	40.5992	0.718384	0.576177	1.04312	0.779226
NM_009797	Capza1	127	988	3187	861	14.4515	15.7664	15.8592	15.359	3	0	0	0	1	0	3	0	1	39.6382	1	5.05066	0.718335	-4.77327	-1.80676	-1.9539
NM_201519	Map4k5	403	2947	4454	2544	18.4342	21.3094	22.0754	20.6063	11	1	6	0	23	0	10	6	23	44.7177	33.7448	39.3154	0.717082	0.127145	0.936196	0.593474
NM_153140	Rab11fip3	200	1535	3271	1335	59.3964	56.9151	55.3488	57.2201	9	1	13	2	36	1	8	11	35	68.1718	117.892	114.009	0.71656	1.31963	1.71602	1.25074
NM_008974	Ptp4a2	728	1232	3413	504	53.5989	51.9893	63.3314	56.3065	3	0	0	0	2	0	3	0	2	67.7153	1	17.2564	0.716461	-5.55204	-0.995998	-1.94386
NM_001172062	Lman1	24	1578	1742	1554	1.60064	0.874082	1.6793	1.38467	2	0	1	0	3	0	2	1	3	14.6412	9.20707	8.39502	0.715952	-0.12806	0.70782	0.431904
NM_020590	Gabarapl1	255	609	1773	354	274.989	252.315	270.865	266.056	4	0	1	1	1	1	4	0	0	128.544	1	1	0.715412	-6.48296	-6.25479	-4.00744
NM_009080	Rpl26	64	502	543	438	33.8361	33.6497	21.8488	29.7782	3	1	1	1	2	0	2	0	2	51.946	1	19.8567	0.71376	-5.17016	-0.321861	-1.59275
NM_178662	Atcay	339	1458	3677	1119	82.4799	95.4366	86.4528	88.1231	8	0	7	1	9	0	8	6	9	81.331	76.7174	34.9755	0.713754	0.440923	-0.308419	0.282086
NM_053014	Agpat3	184	1315	3439	1131	29.9848	26.9493	25.7081	27.5474	5	0	4	0	9	0	5	4	9	50.2926	50.6023	34.6044	0.713513	0.53765	0.537119	0.596094
NM_001130189	Sgce	116	1472	1704	1356	4.87978	4.4083	6.19937	5.16248	3	0	1	0	4	1	3	1	3	25.1685	10.5515	9.62084	0.713037	-0.720304	-0.0698498	-0.0257054
NM_183256	Cox14	239	413	723	174	58.3997	42.682	55.0721	52.0512	1	0	1	0	1	0	1	1	1	65.3803	82.2287	24.9921	0.712682	0.856635	-0.403482	0.388612
NM_053171	Csmd1	411	11106	14278	10695	10.0852	9.15709	10.5857	9.94266	33	2	10	3	74	2	31	7	72	32.9744	9.36461	29.2754	0.712037	-1.28536	1.05035	0.15901
NM_001166416	Med23	113	4244	4946	4131	7.60057	8.90727	7.7875	8.09844	12	1	11	0	24	0	11	11	24	30.2924	38.0987	25.2643	0.711953	0.862081	0.989659	0.854564
NM_178892	Tiparp	227	2201	4154	1974	3.83563	4.25199	4.46007	4.18256	4	0	2	0	13	0	4	2	13	23.052	14.4962	28.6383	0.711796	-0.135884	1.65971	0.745206
NM_024262	Smg8	24	3000	3221	2976	7.49729	8.95028	8.42615	8.29124	9	1	4	0	16	0	8	4	16	30.5811	19.2309	23.3797	0.711612	-0.138339	0.860394	0.477889
NM_008149	Gpam	148	2632	3834	2484	4.74017	3.07125	4.57799	4.1298	7	2	9	0	23	1	5	9	22	22.8989	51.8398	38.5143	0.709748	1.71011	2.09655	1.50547
NM_001290486	Lpar1	125	1166	3247	1041	4.06365	3.97037	3.05317	3.69573	2	0	1	2	6	0	2	-1	6	21.8562	1	25.0641	0.708719	-3.91931	1.559	-0.55053
NM_145488	Pex6	37	2983	3200	2946	11.1564	11.8957	11.0208	11.3576	9	0	5	1	26	0	9	4	26	34.7541	19.4267	38.3789	0.708552	-0.312368	1.34246	0.579549
NM_019571	Tspan5	372	1179	3168	807	93.6887	99.1069	100.6	97.7984	7	1	3	0	7	0	6	3	7	84.5812	53.1888	37.7204	0.708183	-0.149956	-0.276547	0.0938933
NM_001123327	Qser1	206	5303	8975	5097	4.58246	4.51281	5.63157	4.90895	12	1	11	1	24	0	11	10	24	24.5513	28.071	20.4761	0.707236	0.721521	1.05714	0.828633
NM_133718	Tmem30a	220	1315	3660	1095	163.917	152.903	171	162.607	13	3	3	0	10	0	10	3	10	103.892	39.1994	39.7134	0.70176	-0.895031	-0.57869	-0.25732
NM_027256	Ints4	141	3036	3244	2895	2.27161	2.44075	3.95776	2.89004	5	0	3	0	7	0	5	3	7	19.648	14.8267	10.5148	0.701652	0.118233	0.487863	0.435916
NM_001038999	Atp8a1	221	3716	8176	3495	46.9777	44.9321	47.2092	46.373	22	3	23	2	44	1	19	21	43	61.8447	85.9695	53.5023	0.701338	0.990065	0.780172	0.823858
NM_010298	Glrb	173	1664	3029	1491	72.5746	73.1583	85.9005	77.2111	11	1	4	1	20	1	10	3	19	76.299	28.7883	55.415	0.700418	-0.893902	0.453384	0.086633
NM_001205241	Kat6b	301	5593	7198	5292	21.181	18.7846	17.9272	19.2976	20	0	13	0	38	0	20	13	38	42.9939	35.1476	31.2259	0.699485	0.225243	0.652428	0.525719
NM_021374	Rgs20	160	880	1778	720	1.14817	0.799292	3.19919	1.71555	1	0	0	0	1	0	1	0	1	15.8002	1	6.03975	0.698133	-3.45925	0.0741356	-0.895661
NM_011674	Ugt8a	100	1726	3599	1626	9.0756	4.34358	7.17991	6.86636	4	0	2	1	22	0	4	1	22	27.9857	8.79938	58.8374	0.696073	-1.15325	2.33148	0.624767
NM_013735	Trp53bp1	129	6039	9624	5910	15.4071	15.0303	14.1849	14.8741	22	2	14	1	57	1	20	13	56	38.4981	31.4723	41.2052	0.695352	0.221974	1.24527	0.720866
NM_001081013	Rlf	176	5603	6585	5427	17.3986	18.0514	19.3986	18.2829	21	1	22	3	44	0	20	19	44	41.9244	50.0918	35.2569	0.695345	0.76877	0.867583	0.777233
NM_007595	Camk2b	210	1839	4025	1629	562.017	630.043	543.964	578.674	26	1	28	6	92	4	25	22	88	174.588	193.23	234.916	0.693875	0.645413	1.04592	0.795069
NM_001177778	Dlg3	350	2858	4943	2508	68.9201	70.0487	68.519	69.1626	17	1	9	0	40	0	16	9	40	72.5753	51.3437	69.356	0.693859	0.00679464	0.85863	0.519761
NM_016772	Ech1	23	1007	1138	984	4.37533	4.54922	4.14152	4.35536	2	0	1	0	4	0	2	1	4	23.1223	14.5404	17.6773	0.692054	-0.15576	0.933687	0.489993
NM_007395	Acvr1b	20	1538	3277	1518	46.7069	45.7213	38.7823	43.7368	8	0	5	0	16	1	8	5	15	59.9535	47.1271	42.9706	0.691422	0.157881	0.50725	0.452184
NM_001159963	Fbxl5	101	2174	2855	2073	43.3385	42.0973	48.0441	44.4933	12	1	22	2	37	1	11	20	36	60.3656	138.039	75.5187	0.691083	1.69805	1.30804	1.23239
NM_021492	Ap3b2	305	3554	3806	3249	24.2415	22.5637	20.7525	22.5193	16	3	23	2	47	1	13	21	46	45.5187	92.4788	61.5686	0.689774	1.52839	1.51757	1.24524
NM_009009	Rad21	245	2153	3605	1908	27.7478	24.3568	23.5776	25.2274	8	0	4	0	27	1	8	4	26	47.6989	29.9954	59.2579	0.689571	-0.164072	1.37831	0.634602
NM_011078	Phf2	120	3411	5260	3291	12.1449	9.66854	13.1622	11.6585	11	1	9	1	18	0	10	8	18	34.5675	34.7804	23.7846	0.685197	0.512188	0.632818	0.610068
NM_152816	Dnm1l	166	2305	4064	2139	60.4871	62.5446	64.1837	62.4051	13	0	12	1	36	2	13	11	34	69.1399	73.5791	69.1225	0.685191	0.587535	0.929886	0.734204
NM_001290424	Fmr1	276	2046	4334	1770	23.6204	20.2364	22.5366	22.1312	8	1	4	2	19	0	7	2	19	44.9905	16.167	46.6801	0.683299	-0.977264	1.13106	0.27903
NM_011251	Rbm6	238	3595	3718	3357	10.8877	10.4022	12.1955	11.1618	10	0	7	1	18	1	10	6	17	33.8879	25.5725	22.0216	0.68251	0.094607	0.553949	0.443689
NM_009677	Ap1g1	383	2861	6876	2478	21.8688	21.9082	26.1647	23.3139	10	0	11	1	43	2	10	10	41	45.9087	57.7393	71.9505	0.681409	0.828028	1.71671	1.07538
NM_053273	Ttyh2	76	1675	3456	1599	1.75768	1.32175	1.03455	1.37133	2	0	1	1	3	0	2	0	3	14.2291	1	8.15876	0.680543	-3.325	0.673808	-0.656882
NM_144958	Eif4a1	122	1343	1880	1221	70.6083	82.6659	73.2199	75.498	8	0	2	2	16	0	8	0	16	74.5368	1	56.9844	0.680083	-5.72786	0.510285	-1.5125
NM_001159729	Rab23	323	1037	4209	714	10.9307	8.92343	9.15109	9.66839	2	0	1	0	1	0	2	1	1	31.866	20.0389	6.0905	0.679385	-0.171076	-1.194	-0.228562
NM_177244	Fastkd1	145	2635	2860	2490	4.49166	4.33015	4.14821	4.32334	5	0	2	2	2	0	5	0	2	22.8437	1	3.49287	0.678965	-4.01334	-1.40027	-1.57821
NM_001142809	Slc6a8	656	2564	3966	1908	27.0299	25.9278	24.3	25.7526	8	0	2	0	27	0	8	2	27	47.6989	14.9977	61.5371	0.677288	-1.17642	1.4175	0.306122
NM_001168591	Lonp2	96	1395	1560	1299	12.9904	11.6476	11.9806	12.2062	4	0	4	0	12	0	4	4	12	35.0306	44.0579	40.172	0.677027	0.825794	1.35499	0.952605
NM_172856	Cers6	79	1234	3930	1155	15.2161	13.5863	19.9323	16.2449	4	0	0	0	3	0	4	0	3	39.398	1	11.2951	0.676134	-4.80688	-0.687124	-1.60596
NM_031256	Plekha3	280	1174	3007	894	13.9753	15.0223	16.16	15.0525	4	1	2	0	5	0	3	2	5	38.1751	32.0085	24.3211	0.67609	0.239198	0.475829	0.463706
NM_009874	Cdk7	103	1144	7598	1041	10.7407	9.17839	11.3579	10.4257	3	0	1	0	8	0	3	1	8	32.7844	13.7443	33.4188	0.675418	-0.760255	1.2062	0.373787
NM_008044	Fxn	21	645	1095	624	2.59187	2.59569	2.3747	2.52076	1	0	0	0	0	0	1	0	0	18.2311	1	1	0.67517	-3.68994	-2.80527	-1.94001
NM_134034	Smek2	399	2862	5108	2463	13.7833	15.0437	13.0448	13.9572	8	0	11	2	31	1	8	9	30	36.9506	52.2818	52.9674	0.674096	0.992342	1.65466	1.10703
NM_028148	Scaf11	263	4634	7724	4371	12.0353	9.90919	11.888	11.2775	14	1	21	0	57	2	13	21	55	33.8344	68.7402	54.7184	0.674082	1.51499	1.85942	1.3495
NM_021346	Zfp318	73	3538	3921	3465	10.4891	9.24231	11.7299	10.4871	10	0	6	1	21	1	10	5	20	32.8317	20.6462	25.1003	0.673997	-0.176733	0.788894	0.428719
NM_013569	Kcnh2	321	3810	4221	3489	3.07878	2.0682	3.85024	2.99907	6	0	3	1	11	1	6	2	10	19.5635	8.20166	12.4638	0.673359	-0.75818	0.705768	0.206982
NM_001166644	Zfp651	190	2380	6353	2190	28.1991	24.255	21.8721	24.7754	9	0	9	3	31	1	9	6	30	46.7514	39.1994	59.5701	0.671403	0.232858	1.39927	0.767845
NM_009297	Supt6	186	5367	6201	5181	22.5791	25.9955	23.4042	23.9929	29	8	44	4	103	1	21	40	102	46.1107	110.464	85.6127	0.670628	1.74676	1.94627	1.45455
NM_194061	D630045J12Rik	0	5823	10970	5823	15.3005	16.0732	16.8593	16.0777	23	3	12	0	38	3	20	12	35	39.0732	29.4854	26.138	0.670363	0.0812492	0.530989	0.427534
NM_001128096	Atp13a3	279	4029	7310	3750	16.4563	15.1501	17.7415	16.4493	19	6	13	1	42	2	13	12	40	39.4374	45.7849	46.3853	0.670123	0.702422	1.34159	0.904711
NM_201407	Dennd4b	143	4676	5419	4533	7.54358	9.1788	9.05715	8.59317	12	0	17	2	40	1	12	15	39	30.1156	47.3454	37.4137	0.668159	1.14002	1.51222	1.1068
NM_001081132	Upf2	103	3913	5174	3810	25.9927	25.9759	26.9189	26.2958	19	3	12	3	35	0	16	9	35	47.774	33.7979	39.948	0.667112	-0.0167435	0.778711	0.47636
NM_001001804	Ephx4	38	1118	1262	1080	18.1095	21.3959	18.8017	19.4357	4	0	4	0	9	0	4	4	9	42.134	52.9918	36.2385	0.666087	0.81331	0.861927	0.780441
NM_199299	Jade2	171	2661	6100	2490	14.113	13.6955	13.561	13.7898	8	0	8	0	18	0	8	8	18	36.55	45.9688	31.4358	0.66556	0.813921	0.910895	0.796792
NM_001122730	Tnrc18	360	8928	10304	8568	23.1125	20.2843	20.7723	21.3897	36	3	50	9	130	6	33	41	124	43.8158	68.4663	62.9352	0.665445	1.12551	1.58735	1.1261
NM_011448	Sox9	375	1899	4146	1524	1.65731	1.32213	1.76395	1.58113	2	0	1	2	2	0	2	-1	2	14.9294	1	5.70685	0.664981	-3.41034	0.0527519	-0.897535
NM_028032	Ppp2r2a	375	1719	4037	1344	21.1647	20.5937	17.3106	19.6897	5	0	5	2	10	1	5	3	9	42.3221	31.937	29.1202	0.664774	0.0749881	0.536814	0.425525
NM_010147	Epn1	439	2167	2565	1728	76.3466	76.2612	64.1205	72.2427	14	3	25	2	72	1	11	23	71	72.4178	190.439	178.676	0.664749	1.87175	2.19162	1.57604
NM_026402	Atg3	271	1216	2013	945	5.16959	5.24443	4.68261	5.03221	2	0	5	1	7	0	2	4	7	24.0766	60.5621	32.212	0.664282	1.81599	1.69244	1.3909
NM_022891	Rpl23	83	506	1062	423	6.65759	8.50696	4.59093	6.58516	1	0	0	0	1	0	1	0	1	26.894	1	10.2804	0.663599	-4.26559	-0.154393	-1.25213
NM_021465	Stag2	230	3926	5826	3696	9.40103	7.80578	10.2097	9.13885	12	2	17	5	63	0	10	12	63	30.7797	46.4539	74.1242	0.662924	1.07568	2.45302	1.39721
NM_010137	Epas1	419	3044	5352	2625	2.00021	1.72597	8.01662	3.91427	5	0	13	2	25	3	5	11	22	21.6689	59.9564	36.4456	0.662051	1.95209	2.05659	1.55691
NM_001029877	Nova2	192	1671	8372	1479	36.4811	35.7322	34.1266	35.4466	7	0	3	0	15	2	7	3	13	53.8426	29.0219	38.2232	0.661615	-0.415549	0.493947	0.246671
NM_011845	Mid2	24	2082	5916	2058	4.55326	4.22101	3.57124	4.11517	6	2	8	0	25	0	4	8	25	22.1111	55.6182	52.8258	0.661359	1.81373	2.55503	1.67671
NM_008426	Kcnj3	961	2467	5215	1506	78.549	79.3394	83.7681	80.5521	10	0	5	0	12	0	10	5	12	75.539	47.5026	34.6504	0.660723	-0.196773	-0.255386	0.0695214
NM_026362	Plgrkt	192	636	843	444	5.43392	7.22491	5.01244	5.89043	1	0	0	0	0	0	1	0	0	25.622	1	1	0.660162	-4.19875	-3.43368	-2.32409
NM_001024458	Add1	220	2428	3917	2208	119.197	117.552	109.369	115.372	17	0	12	3	67	0	17	9	67	87.5883	58.3198	131.955	0.660065	-0.11616	1.40773	0.650547
NM_001042488	Dlgap4	596	1454	2914	858	95.2596	93.0451	86	91.4349	6	0	20	1	39	0	6	19	39	79.5537	316.839	197.665	0.659884	2.46493	2.1629	1.76257
NM_133828	Creb1	225	1209	8379	984	12.4374	11.4606	12.8983	12.2655	3	0	1	0	3	0	3	1	3	34.6835	14.5404	13.258	0.659774	-0.776438	-0.247921	-0.121528
NM_146122	Dennd1a	255	3306	4352	3051	21.532	23.045	23.6011	22.726	12	0	11	0	19	0	12	11	19	44.7441	51.5849	27.0809	0.659562	0.680735	0.325885	0.555394
NM_133704	Sec22a	112	1036	3992	924	5.65016	6.07738	4.35609	5.36121	2	0	2	0	2	0	2	2	2	24.6238	30.9692	9.4126	0.658949	0.810445	-0.129386	0.44667
NM_001112705	Tlk2	527	2780	5481	2253	5.89574	5.38942	5.81166	5.69894	7	2	6	1	17	1	5	5	16	25.2467	31.7528	30.8823	0.658576	0.809869	1.5395	1.00265
NM_001109688	C2cd5	249	3222	4310	2973	25.1036	31.7719	31.448	29.4412	13	0	8	0	19	1	13	8	18	49.7445	38.5006	26.3287	0.658069	0.103473	0.0935748	0.285039
NM_025599	Cmss1	141	972	1171	831	1.19057	1.04024	1.66544	1.29875	1	0	1	0	1	0	1	1	1	13.6897	17.2176	5.233	0.657209	0.81341	0.0733547	0.514658
NM_001104530	Med7	250	952	2392	702	9.09648	11.9673	10.4632	10.509	2	0	2	0	0	0	2	2	0	32.4108	40.7629	1	0.654137	0.8034	-3.86228	-0.801581
NM_001166164	Ccdc74a	55	1150	1278	1095	4.09083	4.52744	2.16183	3.59337	2	0	3	1	7	0	2	2	7	20.7784	26.1329	27.7994	0.652503	0.805327	1.72923	1.06235
NM_018817	Smarcal1	246	2979	6715	2733	11.1595	10.8691	11.7381	11.2556	8	0	5	2	32	0	8	3	32	33.3002	15.7056	50.9169	0.65228	-0.613722	1.75698	0.598512
NM_172821	Map3k13	0	2880	6709	2880	4.9576	3.96417	5.91066	4.94414	6	0	2	0	15	0	6	2	15	23.7004	9.93596	22.6491	0.652088	-0.78111	1.19736	0.356113
NM_145494	Me2	99	1869	2455	1770	2.49463	2.93573	3.57475	3.0017	3	0	2	0	7	0	3	2	7	19.2817	16.167	17.1979	0.6519	0.220358	1.16961	0.680623
NM_153131	Unc5a	230	2927	3974	2697	77.293	72.0328	67.1096	72.1451	18	1	19	1	55	1	17	18	54	71.7074	95.4914	87.0691	0.651334	0.876667	1.15551	0.894505
NM_027491	Rragd	465	1665	5047	1200	28.3042	26.3278	24.9558	26.5293	5	0	6	0	15	0	5	6	15	47.4007	71.5389	54.3578	0.650528	1.05975	1.21653	0.975604
NM_013494	Cpe	160	1591	2172	1431	420.865	460.768	434.73	438.788	29	10	47	7	112	4	19	40	108	151.046	399.938	328.198	0.649879	1.86076	1.73322	1.41462
NM_013899	Timm10	171	444	666	273	23.7742	15.5466	19.0337	19.4515	1	0	0	0	1	0	1	0	1	41.671	1	15.929	0.649661	-4.91487	-0.324541	-1.52992
NM_008129	Gclm	429	1254	2072	825	7.11304	6.61383	7.76514	7.164	3	1	4	0	3	0	2	4	3	27.5786	69.3711	15.8132	0.649637	1.80017	0.404456	0.951421
NM_010922	Mrpl40	114	735	1055	621	13.4035	12.8932	16.483	14.2599	2	0	0	0	2	0	2	0	2	36.6382	1	14.0052	0.649058	-4.72876	-0.280367	-1.45335
NM_007889	Dvl3	131	2282	2953	2151	7.65501	6.56567	5.22834	6.48301	5	0	5	1	14	0	5	4	14	26.4439	26.6068	28.3034	0.648569	0.477507	1.31826	0.814779
NM_009454	Ube2e3	387	1011	1539	624	37.4324	35.9474	39.7057	37.6952	3	0	2	0	12	1	3	2	11	54.6932	45.8583	76.6584	0.647561	0.207623	1.45241	0.769198
NM_001177986	Zmym3	230	1724	1964	1494	27.5576	26.4112	19.5287	24.4992	7	1	4	0	12	0	6	4	12	45.6875	38.3073	34.9287	0.644876	0.206367	0.637398	0.496214
NM_145434	Nr1d1	629	2477	2765	1848	52.0782	50.3695	48.9026	50.4501	10	0	4	1	20	0	10	3	20	61.5594	23.2269	47.063	0.64443	-0.948478	0.532773	0.0762416
NM_025611	Cul7	386	5456	5529	5070	1.56695	0.789461	1.46969	1.27537	7	1	4	0	19	1	6	4	18	13.4629	11.2882	15.4389	0.643935	0.215234	1.64766	0.835611
NM_178750	Ss18l1	317	1526	4369	1209	28.8103	25.0929	25.146	26.3497	5	0	2	0	5	0	5	2	5	47.0479	23.6688	17.9844	0.643797	-0.531919	-0.374183	-0.0874351
NM_001081567	Mapk10	566	1961	6599	1395	41.6499	40.6563	44.0837	42.13	9	2	8	2	30	0	7	6	30	57.0848	61.5389	93.5187	0.642998	0.565261	1.65687	0.955043
NM_010421	Hexa	57	1644	1865	1587	8.97044	8.16435	6.79703	7.97727	4	0	0	1	4	0	4	-1	4	28.6734	1	10.9606	0.641698	-4.38055	-0.203953	-1.31427
NM_001081419	Dip2a	94	4783	6355	4689	6.15046	6.22957	7.74873	6.70959	11	0	18	4	56	1	11	14	55	26.6876	42.7189	51.0075	0.641321	1.14	2.14256	1.30796
NM_009078	Rpl19	62	653	752	591	45.6861	46.9754	38.2524	43.638	4	1	4	0	10	1	3	4	9	57.7471	96.8378	66.2226	0.638675	1.19825	1.1329	0.989942
NM_001082484	Snx27	167	1787	5469	1620	31.3824	29.0851	28.2008	29.5561	7	0	10	1	23	1	7	9	22	49.1563	79.4877	59.0553	0.638586	1.14699	1.25612	1.0139
NM_001081391	Csmd3	85	11209	13022	11124	3.12008	3.28181	2.9828	3.12823	20	1	12	1	33	0	19	11	33	19.4307	14.1483	12.9004	0.638398	0.00318547	0.724227	0.45527
NM_009423	Traf4	110	1523	3016	1413	1.89854	2.65892	1.40102	1.98616	2	0	0	0	2	0	2	0	2	16.1022	1	6.15516	0.638122	-3.54705	-0.00699968	-0.971977
NM_001290646	Lhx2	528	1626	2234	1098	19.5688	18.4027	20.8059	19.5925	4	0	6	1	10	0	4	5	10	41.4433	65.1539	39.6049	0.637452	1.10658	0.984136	0.909388
NM_139236	Nol6	94	3553	4483	3459	21.1582	24.1378	18.0899	21.1286	13	0	11	3	40	1	13	8	39	42.7552	33.0912	49.0304	0.637415	0.0839204	1.23625	0.652527
NM_001081028	Sipa1l3	616	5947	7713	5331	55.0138	57.2499	56.1325	56.1321	38	8	46	1	141	4	30	45	137	64.019	120.775	111.754	0.637329	1.36599	1.70142	1.23491
NM_001136070	Eif2d	163	1876	1976	1713	3.55292	3.49326	2.96087	3.33568	3	0	3	0	6	0	3	3	6	19.9233	25.0574	15.2316	0.636232	0.789303	0.916334	0.780623
NM_001302266	Aktip	198	1077	2149	879	17.1454	16.6743	16.4863	16.7687	3	0	5	1	8	0	3	4	8	38.8265	65.1094	39.5779	0.636137	1.19889	1.09838	0.977801
NM_177588	Thnsl1	326	2570	3899	2244	10.1907	8.46134	9.25344	9.30182	8	2	5	1	17	0	6	4	17	30.4176	25.5041	32.9441	0.635313	0.200018	1.27001	0.70178
NM_172707	Ppp1cb	386	1370	4024	984	98.1348	90.4105	109.894	99.4798	9	2	7	1	28	3	7	6	25	80.9281	87.2426	110.483	0.634323	0.553736	1.26124	0.816434
NM_010248	Gab2	75	2076	6008	2001	2.48625	2.63575	1.81238	2.31146	3	0	1	0	6	0	3	1	6	17.0557	7.15032	13.0393	0.630704	-0.799971	0.963707	0.264813
NM_007552	Bmi1	471	1446	3594	975	27.9712	23.9512	27.3578	26.4267	4	0	3	0	1	1	4	3	0	46.6715	44.024	1	0.630469	0.361635	-4.54501	-1.1843
NM_207209	Sec24b	239	3995	4702	3756	11.3412	11.9601	11.8899	11.7304	14	3	16	1	59	1	11	15	58	33.3168	57.1397	67.1512	0.628365	1.22472	2.12565	1.32625
NM_001164363	Nt5c2	433	2194	4181	1761	10.6347	10.5128	11.5446	10.8974	7	2	4	0	10	0	5	4	10	32.3003	32.4992	24.694	0.62758	0.454794	0.736942	0.606438
NM_010480	Hsp90aa1	144	2346	2850	2202	429.812	475.138	435.151	446.701	30	1	35	15	78	2	29	20	76	149.822	129.953	150.089	0.627487	0.228255	0.591236	0.482326
NM_172508	Dse	525	3402	4225	2877	2.2627	2.81105	4.92365	3.33247	5	0	4	1	5	1	5	3	4	19.7709	14.9195	6.04605	0.625733	0.0418412	-0.415954	0.0838732
NM_008312	Htr2c	688	2068	4750	1380	6.23701	4.0604	6.91133	5.73625	3	0	2	1	2	0	3	1	2	24.7308	10.368	6.30235	0.624899	-0.808791	-0.75815	-0.314014
NM_026273	4930453N24Rik	76	1123	1331	1047	10.699	12.4314	10.5008	11.2104	3	0	1	0	11	0	3	1	11	32.5965	13.6655	45.6875	0.623864	-0.81205	1.60361	0.471809
NM_008942	Npepps	118	2881	4143	2763	46.8709	43.1718	43.9738	44.6722	15	1	9	5	31	0	14	4	31	57.6426	20.7134	48.7902	0.622099	-1.0408	0.674826	0.0853764
NM_013736	Tceb3	24	2346	4592	2322	9.66116	8.02442	8.70636	8.79731	6	0	3	1	11	0	6	2	11	29.3958	12.3237	20.6007	0.619261	-0.815849	0.633967	0.145793
NM_007839	Dhx15	196	2584	3042	2388	22.2277	21.9905	21.5837	21.934	9	0	7	2	24	0	9	5	24	42.875	29.9577	43.7047	0.619152	-0.0820235	1.04266	0.526598
NM_001110844	Cacna2d1	323	3599	7436	3276	67.6227	68.6244	75.3365	70.5279	23	3	15	3	40	1	20	12	39	69.4516	52.4095	51.7693	0.618736	0.0247158	0.422234	0.355228
NM_001253713	Mbnl1	277	1147	4536	870	34.2041	32.6282	39.6982	35.5101	4	0	2	0	7	0	4	2	7	52.3043	32.8915	34.9889	0.618728	-0.23605	0.365072	0.24925
NM_020012	Rnf14	345	1803	3040	1458	73.5404	66.5826	77.2499	72.4576	10	1	21	2	37	4	9	19	33	70.2233	186.453	98.4256	0.618585	1.83944	1.32918	1.2624
NM_026037	Mboat2	101	1661	2802	1560	7.51667	9.92639	8.52615	8.6564	5	1	5	0	2	1	4	5	1	29.1697	45.8583	2.78758	0.617747	1.08958	-2.23969	-0.177453
NM_023872	Kcnq5	361	3163	6923	2802	8.7097	8.53371	7.15994	8.13445	8	1	8	1	32	0	7	7	32	28.4201	35.7439	49.663	0.617266	0.767379	1.96145	1.11536
NM_011791	Ash2l	30	1902	3303	1872	9.64772	8.91248	10.1359	9.56536	5	0	3	1	10	0	5	2	10	30.3851	15.2861	23.2298	0.617115	-0.555238	0.74528	0.269052
NM_029870	Crebrf	311	2234	7455	1923	9.92486	7.46177	9.57019	8.98561	5	0	3	2	16	0	5	1	16	29.5792	7.44035	36.182	0.615611	-1.55653	1.43087	0.163314
NM_001081473	Zxdb	106	2728	5623	2622	7.25219	5.43385	7.11002	6.59868	6	0	10	1	21	0	6	9	21	26.0324	49.1114	34.8288	0.6154	1.35117	1.60447	1.19035
NM_013625	Pafah1b1	564	1797	5517	1233	111.631	106.128	110.113	109.291	11	2	19	2	40	0	9	17	40	83.0378	197.269	141.074	0.615378	1.67441	1.54423	1.27801
NM_016802	Rhoa	471	1053	2175	582	50.4323	46.5779	44.3097	47.1066	3	0	2	1	5	0	3	1	5	58.6401	24.5838	37.3593	0.615217	-0.825461	0.250415	0.0133904
NM_001195496	Dclk2	714	3030	4092	2316	31.9774	31.1823	28.9531	30.7043	14	4	13	2	45	0	10	11	45	49.1199	67.9558	84.4939	0.614798	0.898006	1.74468	1.08583
NM_016737	Stip1	138	1770	2173	1632	23.4635	20.1806	18.9219	20.8553	6	0	3	2	7	0	6	1	7	41.8242	8.76703	18.6522	0.613413	-1.82456	-0.148447	-0.453198
NM_207213	Snx25	63	2586	3067	2523	8.29584	11.551	11.8167	10.5545	8	1	17	0	34	1	7	17	33	31.5629	96.406	56.8785	0.613318	2.04267	1.96433	1.54011
NM_053074	Nup62	472	2053	3746	1581	15.1793	11.8419	16.5295	14.5169	5	0	4	1	4	0	5	3	4	35.9778	27.1495	11.0022	0.612164	0.0233895	-0.641765	-0.00207034
NM_001081079	Ogfrl1	124	1519	4844	1395	80.5973	80.3656	84.0441	81.669	9	0	7	0	16	0	9	7	16	73.3947	71.7954	49.8766	0.610967	0.390856	0.259913	0.420579
NM_001290540	Pdzd4	628	2602	3627	1974	57.3005	57.2901	57.3543	57.3149	11	0	16	4	29	0	11	12	29	63.3931	86.9774	63.8855	0.610722	0.879887	0.879214	0.789941
NM_011145	Ppard	275	1598	3218	1323	6.31288	6.59279	6.6159	6.50719	3	0	2	0	6	0	3	2	6	25.7963	21.6293	19.7216	0.610579	0.176469	0.794305	0.527118
NM_175191	Gpr22	1332	2742	4587	1410	52.1576	58.0911	69.9394	60.0627	9	1	4	0	22	1	8	4	21	64.5457	40.5895	64.7667	0.6088	-0.247721	0.864307	0.408462
NM_001081337	Sipa1l2	114	5283	6365	5169	23.2646	25.2459	22.9033	23.8046	22	2	16	2	63	2	20	14	61	44.0169	38.752	51.3186	0.608282	0.240258	1.21376	0.687434
NM_007840	Ddx5	178	2026	3520	1848	377.268	396.639	433.814	402.574	23	0	18	1	63	1	23	17	62	141.587	131.619	145.895	0.607923	0.30899	0.627361	0.514758
NM_001146318	Cnp	402	1605	2548	1203	57.471	35.9349	38.7162	44.0407	8	2	5	2	34	1	6	3	33	56.739	35.6803	119.289	0.607792	-0.2477	1.97516	0.778418
NM_008186	Gtf2h1	210	1854	2745	1644	14.1121	14.1633	11.7227	13.3327	5	0	0	0	4	0	5	0	4	34.5991	1	10.5806	0.606522	-4.68845	-0.635134	-1.57235
NM_053089	Naa15	307	2905	6090	2598	19.892	19.7186	15.3446	18.3184	9	0	6	1	15	0	9	5	15	39.4094	27.5362	25.1075	0.604938	-0.0956394	0.376358	0.295219
NM_172671	Lgr4	474	3330	5060	2856	8.03942	8.94733	6.80909	7.93195	8	1	3	1	25	1	7	2	24	27.8828	10.0195	36.543	0.604756	-1.0524	1.53753	0.363296
NM_178714	Lrfn5	1859	4100	5191	2241	14.3206	12.7303	15.7478	14.2663	7	0	4	0	18	0	7	4	18	35.5347	25.5382	34.9287	0.60467	-0.0544366	1.03775	0.529328
NM_029078	Pcf11	292	4954	5804	4662	12.0275	9.95162	10.5564	10.8452	15	2	9	3	20	1	13	6	19	31.7225	18.4141	17.7228	0.604399	-0.36192	0.261941	0.16814
NM_016874	Deaf1	155	1856	2192	1701	12.357	11.4847	13.1231	12.3216	5	0	1	0	4	0	5	1	4	33.4397	8.4114	10.226	0.604365	-1.56883	-0.625917	-0.530127
NM_001110140	Atp2a2	540	3675	4502	3135	104.991	98.0828	100.573	101.215	26	4	24	2	72	1	22	22	71	79.8328	100.406	98.4855	0.604354	0.746101	1.08259	0.811016
NM_172549	Cabin1	462	7026	7460	6564	18.7885	18.5739	19.2147	18.859	26	3	23	5	84	1	23	18	83	39.8617	39.2353	54.9871	0.604061	0.397747	1.4858	0.829202
NM_172650	Kctd3	228	2676	3703	2448	27.5378	29.0851	25.4553	27.3594	11	1	16	2	34	0	10	14	34	46.4713	81.8256	60.3975	0.603591	1.23511	1.34572	1.06147
NM_025736	Emc2	57	951	1245	894	15.8372	17.2852	17.8836	17.002	3	0	1	0	2	0	3	1	2	38.1751	16.0042	9.72846	0.603487	-0.833809	-0.936266	-0.388862
NM_001177374	Ubr2	313	5581	7649	5268	15.2192	15.1157	16.169	15.5013	18	1	11	2	41	1	17	9	40	36.7113	24.4438	33.0191	0.602168	-0.167397	0.895169	0.443313
NM_026753	Fam96b	38	530	680	492	4.83268	7.01614	3.34598	5.06493	1	0	0	0	0	0	1	0	0	23.1223	1	1	0.602075	-4.10824	-3.32189	-2.27602
NM_133347	Dhx30	176	3830	3904	3654	20.1002	19.6572	19.3158	19.691	15	2	19	1	72	0	13	18	72	40.4735	70.4817	85.6871	0.600301	1.21697	2.09382	1.3037
NM_001290528	Map3k10	557	3380	3669	2823	41.7438	36.3544	32.3797	36.826	13	0	23	5	47	1	13	18	46	52.3876	91.2293	70.8596	0.599335	1.21392	1.3562	1.05649
NM_175199	Hspa12a	95	2123	5733	2028	89.0302	78.244	78.9774	82.0839	14	1	8	1	21	1	13	7	20	72.9242	49.3859	42.8858	0.598669	-0.151974	0.0382975	0.161664
NM_009801	Car2	327	1110	1790	783	9.45756	9.13023	7.98975	8.85918	2	0	3	2	7	0	2	1	7	29.0579	18.273	38.8766	0.598405	-0.251766	1.54499	0.630541
NM_175274	Ttyh3	204	1779	4659	1575	80.4312	80.245	80.0908	80.2557	10	0	2	1	19	0	10	1	19	72.2297	9.08431	52.4595	0.598291	-2.58112	0.345679	-0.545717
NM_019514	Astn2	123	4026	4675	3903	1.88515	1.6285	1.49483	1.66949	5	0	3	0	13	1	5	3	12	14.5736	10.9975	13.3701	0.59777	0.0161718	1.24073	0.618225
NM_001110351	Sin3a	164	3989	4979	3825	7.07018	7.31916	7.44211	7.27715	9	0	6	1	21	0	9	5	21	26.7675	18.703	23.8748	0.597226	-0.100289	0.987215	0.494717
NM_212438	Wiz	58	2929	3903	2871	17.0053	14.0964	12.6584	14.5867	9	0	5	0	17	1	9	5	16	35.662	24.9178	24.2347	0.596586	-0.103236	0.493968	0.329106
NM_001163542	Plec	6	13776	14972	13770	72.0497	70.2543	70.7953	71.0331	90	7	100	18	254	4	83	82	250	68.571	85.2025	78.951	0.59607	0.721505	1.02581	0.781128
NM_026167	Klhl13	240	2157	3251	1917	9.12814	9.21115	9.74813	9.36248	5	0	1	1	10	0	5	0	10	29.6718	1	22.6845	0.595626	-4.47653	0.726883	-1.05134
NM_001081114	Clip3	149	1793	3300	1644	118.126	111.569	109.479	113.058	12	0	18	1	45	2	12	17	43	83.0378	147.952	113.741	0.595177	1.23906	1.20844	1.01423
NM_007698	Chrm1	524	1907	6198	1383	116.758	113.253	101.581	110.531	11	1	4	0	26	1	10	4	25	82.2572	41.3819	78.6085	0.595029	-0.585445	0.692183	0.233922
NM_017367	Ccni	626	1760	2804	1134	77.5636	70.666	78.1296	75.4531	9	2	8	1	15	0	7	7	15	70.2233	88.3197	57.5214	0.594435	0.737157	0.524259	0.618617
NM_019939	Mpp6	292	1912	2180	1620	4.47665	3.30606	4.54754	4.11008	4	1	7	1	17	1	3	6	16	21.067	52.9918	42.9493	0.592308	1.74469	2.25734	1.53144
NM_021895	Actn4	97	2836	3811	2739	31.4478	34.8932	32.879	33.0734	12	0	6	1	26	0	12	5	26	49.8409	26.1186	41.2793	0.591509	-0.526067	0.656228	0.240557
NM_197940	Wipf2	373	1696	7589	1323	24.1116	21.7225	23.5566	23.1302	5	0	1	1	8	0	5	0	8	42.9939	1	26.2955	0.591487	-5.01871	0.270374	-1.38562
NM_001081316	Dsel	1661	5285	5763	3624	7.62032	8.45477	9.05232	8.3758	11	2	9	2	26	0	9	7	26	28.2521	27.6365	31.1987	0.591279	0.378725	1.26911	0.746372
NM_029357	Pcdh1	230	3347	3902	3117	92.5133	84.5223	72.9294	83.3217	22	2	10	3	48	2	20	7	46	72.9944	32.1317	64.176	0.591134	-0.781046	0.60875	0.139612
NM_175158	Utp20	164	8534	8831	8370	2.28912	2.1955	3.58863	2.69108	14	1	17	4	35	0	13	13	35	17.6691	22.2224	18.1842	0.591021	0.744804	1.33094	0.88892
NM_178707	Zfp592	204	3993	7292	3789	9.98966	9.38258	9.76183	9.71136	12	2	11	2	20	1	10	9	19	30.0242	33.9852	21.8062	0.590848	0.58837	0.642828	0.607349
NM_172666	Agps	36	2052	7359	2016	8.89057	7.54532	8.70124	8.37904	5	0	2	1	9	0	5	1	9	28.2147	7.09712	19.4135	0.589139	-1.58277	0.584398	-0.136412
NM_144557	Myrip	161	2732	4762	2571	11.2297	9.97621	10.375	10.527	7	0	8	1	30	0	7	7	30	30.9736	38.9555	50.7424	0.587687	0.736944	1.80157	1.04207
NM_001099276	Pik3c2b	500	5399	7929	4899	5.23722	4.90331	5.59562	5.24538	11	1	7	0	25	1	10	7	24	23.2214	20.4439	21.3037	0.587376	0.224371	1.06523	0.625658
NM_025279	Hnrnpk	147	1539	2793	1392	83.7342	83.9557	88.6202	85.4367	11	2	8	1	31	0	9	7	31	73.5529	71.9501	96.8443	0.587186	0.366926	1.18382	0.712645
NM_008507	Sh2b3	337	1984	4274	1647	4.60167	4.01385	3.3462	3.98724	3	0	5	0	2	0	3	5	2	20.7216	43.4359	5.28066	0.58655	1.47599	-0.744043	0.4395
NM_172806	Btbd7	450	3843	4306	3393	3.57304	3.04106	4.52909	3.7144	7	1	12	0	17	0	6	12	17	20.117	50.6023	21.788	0.586087	1.7388	1.35318	1.22602
NM_010078	Drp2	236	3110	6983	2874	18.4819	20.0462	18.8515	19.1265	12	2	10	1	18	0	10	9	18	39.5831	44.8052	27.2356	0.585546	0.580819	0.461771	0.542712
NM_139150	Carf	221	2291	5557	2070	8.78986	7.5991	7.34069	7.90988	5	0	2	0	11	0	5	2	11	27.4787	13.824	23.1086	0.585355	-0.586368	0.878431	0.292473
NM_001293707	Pip5k1a	479	2123	3676	1644	33.4831	32.8886	27.278	31.2166	7	0	3	1	24	1	7	2	23	48.4387	17.4061	60.8384	0.584785	-1.07692	1.25857	0.255477
NM_201369	N4bp2l2	112	1840	8981	1728	11.9696	10.715	14.1329	12.2725	7	2	1	0	6	0	5	1	6	32.9172	8.27997	15.0994	0.584024	-1.58916	-0.0607192	-0.355284
NM_178589	Tnfrsf21	442	2410	3626	1968	50.011	51.1749	42.7139	47.9666	10	0	7	1	19	1	10	6	18	57.8058	43.6213	39.774	0.583759	-0.00898211	0.327379	0.300718
NM_170591	Nupl1	109	1873	2394	1764	7.77859	4.96102	7.73899	6.8262	6	2	3	1	12	2	4	2	10	25.7963	16.222	24.652	0.582047	-0.267259	1.0808	0.465195
NM_177667	Ttc22	102	1809	2535	1707	1.49276	1.56169	1.08987	1.38144	2	0	0	0	0	0	2	0	0	13.3289	1	1	0.581869	-3.3294	-2.35998	-1.7025
NM_024465	Abhd12	184	1381	1967	1197	89.9129	94.1819	96.338	93.4776	9	1	10	0	18	0	8	10	18	76.0313	119.53	65.3928	0.581376	1.04531	0.550695	0.725795
NM_008417	Kcna2	681	2181	11582	1500	38.5966	38.1167	40.8893	39.2009	9	2	5	1	22	1	7	4	21	53.0888	38.1541	60.8807	0.58126	-0.0812004	1.09095	0.530337
NM_025586	Rpl15	38	653	1841	615	88.4126	91.6402	83.5105	87.8545	4	0	4	0	8	0	4	4	8	73.9914	93.0588	56.5674	0.579126	0.721343	0.387468	0.562645
NM_001177379	Cpeb2	0	2979	6757	2979	13.8903	12.3338	15.0806	13.7682	10	1	12	2	26	0	9	10	26	34.3691	48.0288	37.9537	0.577738	0.878107	1.18389	0.879911
NM_175115	Ikzf5	142	1402	4390	1260	15.3684	14.5213	16.6961	15.5286	4	0	5	1	10	0	4	4	10	36.1148	45.4216	34.5129	0.577489	0.725456	0.9577	0.753548
NM_001163395	Evl	223	1423	1873	1200	3.66855	2.92661	3.21046	3.26854	3	1	4	1	6	1	2	3	5	18.9603	35.7695	18.1193	0.576882	1.31498	1.18184	1.02457
NM_178716	Tnpo1	119	2816	5391	2697	6.47444	5.14046	8.10936	6.57475	7	1	4	1	20	0	6	3	20	25.3085	15.9152	32.2478	0.576878	-0.272303	1.49608	0.600219
NM_181595	Ppp1r9a	350	3638	9547	3288	59.8726	57.6928	56.8399	58.1351	22	4	27	6	61	0	18	21	61	62.2783	91.3819	80.677	0.576657	0.942636	1.20536	0.908218
NM_172958	Mtmr12	105	2349	4518	2244	27.1438	26.939	28.1656	27.4162	9	0	9	1	19	0	9	8	19	45.6264	51.0082	36.8199	0.575883	0.552039	0.630184	0.586035
NM_173753	Fnip1	118	3616	6281	3498	21.7287	23.5957	23.1061	22.8102	13	0	9	2	34	1	13	7	33	42.2785	28.6319	41.0247	0.575588	-0.170805	0.922368	0.442383
NM_145070	Hip1r	135	3342	4392	3207	6.90412	6.42527	5.55051	6.2933	8	1	5	0	18	1	7	5	17	24.8311	22.3071	23.0516	0.575484	0.241022	1.04414	0.620215
NM_198610	Igsf21	440	1847	2000	1407	11.7258	12.0797	12.0264	11.944	4	0	3	1	4	0	4	2	4	32.3417	20.338	12.3628	0.574753	-0.276409	-0.329111	-0.0102558
NM_001039474	Tcerg1	40	3343	4409	3303	16.1378	17.6359	18.799	17.5242	12	1	5	1	31	1	11	4	30	37.8861	17.327	39.497	0.574491	-0.737374	1.0628	0.299971
NM_016980	Rpl5	116	1010	2019	894	18.9646	16.2899	18.4333	17.8959	3	0	8	1	11	1	3	7	10	38.1751	112.03	48.6423	0.57294	1.94283	1.34773	1.28783
NM_172617	Zfp523	328	2035	2712	1707	27.3191	30.1311	29.7831	29.0778	7	0	3	0	14	1	7	3	13	46.651	25.1455	33.1178	0.572844	-0.503663	0.433741	0.167641
NM_019679	Fmnl1	175	3448	3873	3273	12.7531	12.502	7.97278	11.076	9	0	9	2	36	1	9	7	35	31.2819	30.6002	46.5022	0.571665	0.358184	1.63804	0.855963
NM_013889	Zfp292	29	8126	9977	8097	11.9176	11.3139	12.722	11.9845	26	3	29	3	70	1	23	26	69	32.3147	45.9433	37.0575	0.571531	0.897236	1.25214	0.906969
NM_177164	Vwc2l	804	1473	4655	669	3.25167	1.28659	3.07232	2.53686	1	0	2	0	4	0	1	2	4	17.0047	42.7737	26.0007	0.570912	1.72489	1.8905	1.39543
NM_053144	Pcdhb19	156	2562	4714	2406	3.30604	2.54098	3.99919	3.28207	4	0	0	0	5	0	4	0	5	18.913	1	9.03703	0.570818	-3.84815	0.175184	-1.03405
NM_029930	Tcaf1	141	2910	3738	2769	43.7971	37.0954	40.5645	40.4857	20	7	16	1	50	1	13	15	49	53.4093	77.507	76.9528	0.570716	0.921955	1.40506	0.965912
NM_172482	Zfp719	272	2480	4993	2208	6.57169	7.136	7.09575	6.93448	5	0	1	0	9	0	5	1	9	25.7613	6.47998	17.7254	0.570703	-1.60058	0.593253	-0.145542
NM_001115150	Uspl1	742	3415	3588	2673	15.8755	12.7595	12.2297	13.6215	10	2	10	2	11	1	8	8	10	34.0477	42.8217	16.2687	0.570566	0.718968	-0.0303251	0.419736
NM_001177536	Prdm11	172	1870	1870	1698	1.11831	1.68279	1.47744	1.42618	2	0	1	0	6	0	2	1	6	13.3995	8.42626	15.3661	0.570495	-0.273615	1.5581	0.618328
NM_010513	Igf1r	602	4712	11978	4110	9.56501	10.1696	11.4515	10.3954	12	1	6	3	28	1	11	3	27	30.4472	10.4436	28.5676	0.570453	-1.15472	0.982073	0.132603
NM_001013389	Mrs2	73	1378	2161	1305	7.5574	7.75065	6.31725	7.20843	3	0	5	0	3	1	3	5	2	26.1521	54.8191	6.66455	0.569329	1.45681	-0.846667	0.393157
NM_007937	Epha5	877	3508	7789	2631	23.697	25.3221	24.0575	24.3589	11	1	6	0	22	1	10	6	21	43.239	32.6289	34.7096	0.568833	-0.0216587	0.632574	0.39325
NM_001005865	Mtus1	338	1661	4169	1323	1.99452	2.24009	3.62539	2.62	2	0	0	0	2	0	2	0	2	17.1975	1	6.57388	0.567954	-3.71309	-0.117113	-1.08742
NM_008679	Ncoa3	220	4432	7531	4212	12.6875	12.5354	11.2216	12.1482	13	1	13	1	25	2	12	12	23	32.4108	40.7629	23.746	0.567727	0.716509	0.600017	0.628084
NM_001008791	Whrn	758	3515	4089	2757	3.11728	2.35839	1.66931	2.38166	4	0	7	0	12	0	4	7	12	16.5052	36.3274	18.9276	0.565527	1.52707	1.47918	1.19059
NM_019542	Nagk	197	1229	1330	1032	4.7545	4.27411	5.37656	4.80172	2	0	1	0	1	0	2	1	1	22.0469	13.8641	4.21378	0.565176	-0.282963	-1.20726	-0.30835
NM_172268	Nup214	114	6372	8195	6258	5.9786	5.35111	5.73129	5.687	14	1	11	3	59	2	13	8	57	23.6322	18.2906	39.6087	0.564483	0.0153441	1.90009	0.826639
NM_153399	Syne1	432	4728	6982	4296	60.2459	61.6446	65.2449	62.3785	28	4	40	9	77	5	24	31	72	63.5541	103.245	72.8819	0.563911	1.0765	1.00661	0.882339
NM_016973	St6galnac6	156	1158	2438	1002	29.5725	30.5613	23.0646	27.7328	4	0	1	0	9	1	4	1	8	45.4139	14.2792	34.7195	0.562303	-1.29165	0.536945	-0.0641357
NM_020608	Cramp1l	105	3963	7519	3858	12.9792	11.4484	12.4283	12.2853	12	1	9	2	32	0	11	7	32	32.436	25.9602	36.0694	0.562156	0.058824	1.1948	0.605259
NM_010277	Gfap	83	1376	2717	1293	12.3333	4.25916	5.86192	7.48479	3	0	4	2	24	1	3	2	23	26.3948	22.1312	77.3536	0.560229	0.125655	2.66237	1.11608
NM_001286654	Rcan2	130	724	3107	594	3.34933	2.9731	4.02766	3.45003	1	0	0	0	3	0	1	0	3	19.1518	1	21.9627	0.559166	-3.87807	1.41937	-0.633178
NM_013926	Cbx8	63	1152	1393	1089	10.9734	14.2099	8.98345	11.3889	5	2	3	1	5	2	3	2	3	31.3393	26.2769	11.9797	0.557702	0.121736	-0.339299	0.113379
NM_016707	Bcl11a	335	2657	3425	2322	43.5837	45.3461	37.9606	42.2968	11	0	12	2	30	0	11	10	30	53.8923	61.6184	56.1837	0.557616	0.564755	0.918841	0.680404
NM_175022	Prr12	0	6108	6879	6108	25.3987	21.1756	18.9475	21.8406	24	2	32	7	93	4	22	25	89	40.9751	58.5617	63.364	0.556304	0.887564	1.5817	1.00852
NM_009510	Ezr	137	1898	3070	1761	1.54077	0.529043	1.9587	1.34284	2	0	2	1	2	1	2	1	1	12.9201	8.12481	2.4694	0.553833	-0.290077	-1.03484	-0.257027
NM_026794	Deb1	14	248	517	234	26.0032	32.2005	41.4942	33.2326	1	0	0	0	1	0	1	0	1	48.6161	1	18.5838	0.552751	-5.23595	-0.498699	-1.7273
NM_009837	Cct4	161	1781	1966	1620	9.16808	9.19063	8.10114	8.81995	4	0	10	1	7	0	4	9	7	28.0893	79.4877	18.7903	0.552141	1.87191	0.499362	0.974471
NM_020253	Nrxn2	479	5015	6084	4536	57.4433	65.471	61.973	61.6291	28	3	31	5	82	3	25	26	79	62.6994	82.0111	75.7366	0.551584	0.75156	1.07098	0.791376
NM_029749	Usp42	127	4102	5151	3975	12.2376	11.9227	10.7589	11.6397	11	0	6	1	17	2	11	5	15	31.4812	17.9972	16.4099	0.551236	-0.437344	0.0985526	0.0708151
NM_011207	Ptpn3	183	2925	6369	2742	16.3	18.5042	18.1172	17.6405	9	0	11	0	20	0	9	11	20	37.3397	57.3981	31.7186	0.549592	0.986643	0.741488	0.759241
NM_010753	Mxd4	137	767	1179	630	17.864	11.9677	19.0226	16.2848	2	0	0	0	2	1	2	0	1	36.1148	1	6.90257	0.549143	-4.80835	-1.39943	-1.88621
NM_176921	6030419C18Rik	1205	2084	2139	879	104.587	109.198	97.7848	103.857	6	0	4	1	18	0	6	3	18	77.6531	48.832	89.0502	0.549057	-0.309281	0.918228	0.386002
NM_001033236	Vcpkmt	42	729	1027	687	1.98777	3.36061	2.0572	2.46853	1	0	0	0	0	0	1	0	0	16.5592	1	1	0.548888	-3.67739	-2.78977	-1.97276
NM_001033430	Kdm7a	139	2962	9553	2823	31.5333	31.8461	35.7089	33.0294	14	2	9	1	28	1	12	8	27	48.3578	40.5463	41.5915	0.548722	0.109222	0.668081	0.442008
NM_023120	Gnb1l	192	1173	3567	981	1.13067	1.67903	0.318932	1.04288	1	0	0	0	1	0	1	0	1	11.5965	1	4.43284	0.548611	-3.16086	-0.00359806	-0.87195
NM_177393	Nalcn	368	5588	7115	5220	12.9744	13.0543	12.4031	12.8106	16	1	10	2	27	1	15	8	26	32.6902	21.9276	21.6598	0.548458	-0.209827	0.42804	0.255557
NM_198021	Scyl2	276	3069	3431	2793	5.03572	4.08289	3.12627	4.08163	5	0	3	1	26	0	5	2	26	20.3655	10.2455	40.4812	0.547593	-0.621934	2.1771	0.700919
NM_133865	Dclre1b	299	1925	4288	1626	1.84627	1.72813	1.36443	1.64628	2	0	1	0	0	0	2	1	0	13.9928	8.79938	1	0.547445	-0.297141	-2.48984	-0.746511
NM_178267	Zfp827	250	3487	7604	3237	11.6686	11.9879	11.9047	11.8537	9	0	5	2	20	0	9	3	20	31.6298	13.2602	26.8682	0.547165	-0.888934	0.796398	0.151543
NM_008977	Ptpn2	111	1260	1612	1149	3.95365	5.28961	2.218	3.82042	2	0	2	0	0	0	2	2	0	19.8019	24.9048	1	0.546529	0.699149	-3.11312	-0.62248
NM_008379	Kpnb1	307	2938	5909	2631	31.4808	33.6534	30.6115	31.9153	14	3	15	3	44	0	11	12	44	47.5629	65.2579	72.7249	0.545265	0.816373	1.49965	0.953762
NM_001103168	Zglp1	14	815	1010	801	1.47895	1.40707	2.25274	1.71292	1	0	0	0	0	0	1	0	0	14.2025	1	1	0.545242	-3.45833	-2.51922	-1.81077
NM_172911	D8Ertd82e	288	4410	4780	4122	7.88535	5.60641	6.39195	6.62791	9	0	6	2	30	1	9	4	29	24.8388	13.8843	30.5944	0.545052	-0.474081	1.41418	0.495051
NM_015801	Pnpla6	215	4199	4438	3984	3.37701	3.33945	5.05354	3.92333	7	0	10	1	24	0	7	9	24	19.9883	32.3218	26.1965	0.544198	1.0593	1.57851	1.06067
NM_013791	Mkln1	29	2237	3973	2208	7.93302	7.61389	6.21768	7.25486	6	1	7	0	15	2	5	7	13	25.7613	45.3598	25.6033	0.543777	1.1797	1.09033	0.937934
NM_183187	Fam107a	297	732	3144	435	9.15374	3.51927	9.92481	7.53261	1	0	1	0	3	0	1	1	3	26.1521	32.8915	29.9905	0.543105	0.693473	1.29069	0.842422
NM_180662	Trappc9	253	3673	4048	3420	10.0001	6.97129	6.62441	7.86526	8	0	7	1	24	1	8	6	23	26.6109	25.1014	29.2451	0.542434	0.277621	1.22238	0.680813
NM_028315	Dis3	97	2974	3722	2877	1.41802	1.0091	0.916952	1.11469	3	0	4	2	7	1	3	2	6	11.8625	9.94633	9.06907	0.541633	0.113378	0.979819	0.544943
NM_019654	Socs5	442	2053	4394	1611	36.7712	31.5804	37.4674	35.273	7	0	9	2	21	3	7	7	18	49.4309	62.1692	48.5879	0.541208	0.686453	0.843734	0.690465
NM_019419	Arl6ip1	121	733	2135	612	156.673	176.775	154.298	162.582	5	0	3	0	6	0	5	3	6	92.9426	70.1362	42.6335	0.541178	-0.0556135	-0.476217	0.00311579
NM_001167776	Rbm10	417	2979	3200	2562	10.2694	12.5936	11.5795	11.4808	7	0	4	2	16	0	7	2	16	31.0824	11.1692	27.1577	0.541036	-1.11735	0.835521	0.0864027
NM_172555	Papolg	232	2452	3764	2220	6.56123	6.90398	8.1173	7.19417	5	0	3	0	6	0	5	3	6	25.622	19.3349	11.753	0.540966	-0.0454795	-0.0267485	0.156246
NM_001005424	Gm996	202	3127	4684	2925	138.637	130.832	130.633	133.367	25	3	26	5	94	2	22	21	92	85.5644	102.723	136.777	0.539931	0.613648	1.3522	0.83526
NM_025432	Trappc2	104	527	1432	423	9.59664	7.79756	6.92294	8.10571	1	0	0	0	2	0	1	0	2	26.894	1	20.5609	0.539748	-4.39013	0.691794	-1.05286
NM_176940	Nwd1	301	4867	7722	4566	2.03756	1.14366	2.69391	1.95838	8	2	8	4	37	1	6	4	36	14.949	12.5342	34.2861	0.539312	0.109188	2.48118	1.04323
NM_001004182	Tmem178b	91	511	3092	420	8.14825	8.83124	7.77904	8.25284	1	0	3	0	7	0	1	3	7	27.0861	102.198	72.477	0.539293	2.27432	2.4961	1.7699
[truncated: 9,326 more rows]

## Sheet: Counts and negative binomial
RefSeq Transcript	Gene Symbol	CDS Length	Camk2a TRAP CDS reads	Camk2a TRAP CDS reads	Camk2a TRAP CDS reads	Camk2a CLIP CDS reads	Neg CLIP CDS reads	CDS reads (Camk2a - Neg)	Camk2a CLIP CDS reads	Neg CLIP CDS reads	CDS reads (Camk2a - Neg)	Camk2a CLIP CDS reads	Neg CLIP CDS reads	CDS reads (Camk2a - Neg)	mean normalized TRAP counts	dispersion parameter	dispersion parameter	dispersion parameter	CLIP score (residual)	CLIP score (residual)	CLIP score (residual)	p-value	p-value	p-value	combined p-value (Fisher's)	FDR
			replicate 1	replicate 2	replicate 3	replicate 1	replicate 1	replicate 1	replicate 2	replicate 2	replicate 2	replicate 3	replicate 3	replicate 3		replicate 1	replicate 2	replicate 3	replicate 1	replicate 2	replicate 3	replicate 1	replicate 2	replicate 3
NM_001081153	Unc13c	6633	170	382	315	195	19	176	143	6	137	309	4	305	279.996	0.450324	0.402947	0.564175	5.84553	5.6016	5.51113	2.86715e-12	9.14856e-10	2.9261e-12	2.15634e-29	1.97521e-25
NM_008615	Me1	1719	252	511	411	14	2	12	1153	645	508	60	6	54	382.525	0.373271	0.334535	0.451219	1.83681	7.25047	2.7349	0.0790306	0	0.0134181	2.26938e-16	1.03937e-12
NM_001029889	Usf3	6666	297	425	396	147	5	142	85	12	73	213	2	211	370.427	0.380685	0.34112	0.461945	5.32112	4.49252	4.71238	4.25928e-08	6.63551e-05	1.03513e-06	2.50532e-15	7.64959e-12
NM_001025259	Mbp	387	75	104	91	15	5	10	14	2	12	82	2	80	90.1044	0.843398	0.750233	1.30714	2.71511	3.04429	4.68446	0.00798231	0.00347178	1.83997e-12	3.78496e-14	7.12279e-11
NM_001110796	Pclo	14592	2241	2894	2483	1025	65	960	694	68	626	1955	53	1902	2561.39	0.114654	0.107155	0.105461	6.57268	6.12443	6.01811	2.65857e-07	1.01333e-05	1.94737e-05	3.88798e-14	7.12279e-11
NM_007462	Apc	8529	3151	5276	5438	1794	146	1648	1329	162	1167	3614	64	3550	4502.51	0.083546	0.0790815	0.0717666	6.91497	6.59866	6.37534	4.19886e-07	5.51402e-06	3.25166e-05	5.47519e-14	8.35878e-11
NM_001204165	Rapgef4	3036	1177	1855	1847	517	39	478	479	65	414	1127	16	1111	1596.05	0.151423	0.139871	0.14859	5.93436	5.88401	5.69809	2.39404e-06	6.33153e-06	1.1725e-05	1.235e-13	1.61609e-10
NM_001081154	Marf1	5211	693	1363	1389	348	18	330	232	12	220	659	9	650	1106.34	0.189542	0.173358	0.196493	5.68488	5.24994	5.27826	2.07357e-06	5.45502e-05	1.96479e-05	1.34222e-12	1.53684e-09
NM_001039000	Kif5a	3084	7503	9141	11800	2861	154	2707	2529	283	2246	5265	120	5145	9315.49	0.0572937	0.0551377	0.0460409	7.06775	6.99707	6.21106	3.61886e-06	7.09716e-06	0.000393162	5.57904e-12	5.67822e-09
NM_019987	Ick	1890	23	37	36	12	1	11	4	2	2	16	0	16	31.4067	1.80662	1.45347	4.80387	3.65658	1.71967	3.4461	1.75975e-05	0.100414	6.71971e-08	5.62401e-11	5.15159e-08
NM_080455	Tshz2	3093	475	565	542	145	3	142	74	11	63	237	2	235	531.425	0.303824	0.272814	0.352415	5.04172	4.01225	4.51987	4.22566e-06	0.00134091	3.43575e-05	8.9271e-11	7.43384e-08
NM_011682	Utrn	10293	121	200	164	27	2	25	30	2	28	77	2	75	160.276	0.61914	0.552619	0.82126	3.51026	3.76967	4.03842	0.000666155	0.000325355	2.25336e-06	2.10564e-10	1.60731e-07
NM_001039198	Zfhx2	7689	165	363	238	47	1	46	32	0	32	115	0	115	251.45	0.47962	0.42894	0.607904	4.01576	3.61816	4.21518	0.00014467	0.00140449	5.51874e-06	4.56493e-10	2.98677e-07
NM_080558	Ssfa2	3759	43	89	64	6	0	6	11	1	10	36	1	35	64.2426	1.0342	0.895807	1.86135	2.32494	3.05714	3.84002	0.0220473	0.00265019	2.52781e-08	5.8973e-10	3.60128e-07
NM_001034964	Sorbs1	2223	112	201	155	40	0	40	11	5	6	68	1	67	154.316	0.632204	0.56419	0.842359	4.19671	1.74748	3.91441	1.11874e-05	0.0846799	5.31947e-06	1.84125e-09	1.05412e-06
NM_001034115	Shank1	6504	1178	2426	1470	335	16	319	285	20	265	771	16	755	1681.54	0.146756	0.135744	0.142941	5.31201	5.20318	5.09119	9.72399e-05	0.000224537	0.000266921	2.10653e-09	1.13505e-06
NM_001002005	Panx2	2034	105	249	179	36	1	35	23	0	23	64	2	62	173.061	0.59334	0.529762	0.781149	3.92033	3.43907	3.69394	9.38806e-05	0.0015638	4.3583e-05	2.29671e-09	1.16877e-06
NM_011049	Cdk16	1491	432	747	678	120	6	114	83	4	79	247	7	240	607.166	0.278809	0.250653	0.317661	4.62419	4.2342	4.42192	9.23984e-05	0.000811884	0.000108781	2.87626e-09	1.38666e-06
NM_001199137	Macf1	15987	1234	1986	2057	326	30	296	287	44	243	835	30	805	1718.32	0.14487	0.134074	0.140672	5.18766	5.0624	5.16277	0.000177328	0.000401278	0.000215837	5.15874e-09	2.3627e-06
NM_019445	Fmn2	4737	155	284	197	31	2	29	37	8	29	84	1	83	210.84	0.530853	0.474377	0.6853	3.50443	3.61283	3.91899	0.00108155	0.00107031	2.07771e-05	7.80166e-09	3.40301e-06
NM_001289474	Erbb2ip	3885	138	406	348	31	4	27	43	7	36	135	4	131	282.487	0.447977	0.400863	0.560688	3.17843	3.69589	4.28962	0.00510576	0.00128039	5.84763e-06	1.19534e-08	4.97695e-06
NM_001081418	Gltscr1	4737	44	70	45	13	1	12	8	3	5	20	0	20	53.5549	1.17239	0.997788	2.30843	3.35889	2.31921	3.23748	0.000302699	0.0265255	6.98744e-06	1.70092e-08	6.7741e-06
NM_001271809	Pcdh11x	3993	100	137	166	32	0	32	17	2	15	33	0	33	131.344	0.690232	0.615569	0.946003	4.00833	3.06107	3.06949	2.66941e-05	0.00443043	0.000690577	2.4012e-08	8.79801e-06
NM_021899	Foxj2	1698	38	49	54	8	1	7	5	0	5	21	1	20	46.5368	1.30145	1.09207	2.75917	2.76719	2.42461	3.37263	0.00465025	0.0197754	8.60515e-07	2.33262e-08	8.79801e-06
NM_001185020	Wnk1	6387	688	1263	1104	170	20	150	129	16	113	442	15	427	996.987	0.202334	0.184513	0.213234	4.63317	4.37302	4.77335	0.000393297	0.00135921	0.000160523	2.51263e-08	8.85219e-06
NM_007567	Bsn	11829	2558	4060	2741	510	34	476	439	60	379	1430	26	1404	3143.23	0.10203	0.0958087	0.0914252	5.40366	5.24836	5.38346	0.000335442	0.000696142	0.000524124	3.47941e-08	1.18042e-05
NM_008957	Ptch1	4305	61	131	120	12	1	11	11	0	11	45	1	44	100.344	0.796518	0.709597	1.18292	2.75732	2.84805	3.7329	0.00738509	0.00722674	2.38643e-06	3.60872e-08	1.18057e-05
NM_001024952	Rc3h1	3393	214	350	356	60	3	57	30	6	24	94	2	92	299.602	0.432627	0.38724	0.537956	4.18351	3.08615	3.72779	9.60281e-05	0.00894979	0.000248756	5.79697e-08	1.77001e-05
NM_007772	Hivep1	8067	324	566	463	79	1	78	54	11	43	134	3	131	445.267	0.339771	0.304771	0.403162	4.32257	3.60441	3.85181	0.00015351	0.00355914	0.000502023	7.27924e-08	2.02054e-05
NM_026872	Ubap2	3399	71	114	106	12	0	12	16	1	15	34	2	32	95.5323	0.817293	0.727926	1.23717	2.91084	3.29996	3.33272	0.00425393	0.00132713	4.84643e-05	7.26271e-08	2.02054e-05
NM_011159	Prkdc	12387	224	281	383	33	3	30	34	3	31	117	2	115	288.798	0.442161	0.395702	0.552062	3.30816	3.46985	4.08195	0.00353205	0.00289659	2.81434e-05	7.60922e-08	2.05001e-05
NM_001294143	Hipk2	3510	95	203	148	15	1	14	18	2	16	60	1	59	145.723	0.65237	0.582049	0.876505	2.7904	3.07058	3.78897	0.00849512	0.00471541	1.102e-05	1.12367e-07	2.9408e-05
NM_001081362	Trrap	11544	883	967	1114	159	7	152	107	21	86	373	5	368	989.009	0.203363	0.185409	0.214594	4.65837	3.98911	4.56709	0.000348821	0.00387344	0.000372966	1.26775e-07	3.22571e-05
NM_008719	Npas2	2451	118	187	187	26	1	25	18	1	17	50	1	49	160.824	0.617974	0.551585	0.819414	3.50761	3.07906	3.43106	0.000678053	0.00503139	0.00017413	1.47265e-07	3.54986e-05
NM_001033420	Dock1	5598	35	118	102	11	1	10	8	2	6	34	1	33	80.1043	0.901509	0.796739	1.46801	2.80619	2.23948	3.54526	0.00549977	0.0334048	3.4335e-06	1.55533e-07	3.65304e-05
NM_001033150	Plekhm2	3102	395	597	651	60	2	58	66	3	63	165	0	165	535.587	0.302312	0.271469	0.350301	3.75846	4.0064	4.00476	0.00221119	0.0013883	0.000470988	3.30386e-07	7.56584e-05
NM_001033276	Kmt2d	16767	837	1416	1017	150	14	136	126	18	108	386	11	375	1088.3	0.191498	0.175067	0.199032	4.42495	4.24256	4.50215	0.0010118	0.00229064	0.000641984	3.39089e-07	7.57573e-05
NM_133833	Dst	16140	2321	2833	3600	375	27	348	350	62	288	1019	16	1003	2870.18	0.107425	0.100666	0.097372	5.02325	4.92162	4.98608	0.000955019	0.00151931	0.00137389	4.41958e-07	9.20076e-05
NM_001190401	Usp34	10749	2166	2547	3334	394	28	366	299	31	268	774	23	751	2640.56	0.112667	0.105374	0.103224	5.16036	4.88073	4.64935	0.000535238	0.00150492	0.00274141	4.84819e-07	9.86876e-05
NM_011952	Mapk3	1143	116	193	179	24	2	22	21	1	20	40	1	39	159.786	0.620188	0.553547	0.822923	3.33575	3.30631	3.11537	0.00140658	0.00231693	0.000880475	6.14362e-07	0.000122338
NM_001123327	Qser1	5097	51	98	106	12	1	11	11	1	10	24	0	24	81.6683	0.891411	0.788941	1.43955	2.91675	2.87705	3.08305	0.00372592	0.00587682	0.000144289	6.70182e-07	0.000125283
NM_008032	Aff2	3819	82	152	116	22	1	21	15	1	14	27	3	24	115.204	0.740485	0.66004	1.04988	3.52487	3.06635	2.75204	0.000363663	0.0038863	0.00222242	6.66644e-07	0.000125283
NM_001081300	Tshz1	3255	53	78	68	8	0	8	8	3	5	24	0	24	66.0982	1.01511	0.881639	1.80257	2.66546	2.1613	3.28656	0.00801464	0.0389831	1.23342e-05	8.01771e-07	0.000146884
NM_021523	Huwe1	13137	5208	6481	8120	846	68	778	668	74	594	1761	39	1722	6491.39	0.0687411	0.0656416	0.0569892	5.54985	5.35106	4.98005	0.000782201	0.00146624	0.00401771	9.41987e-07	0.000165935
NM_054093	Ube3b	3213	400	757	727	66	1	65	80	2	78	139	5	134	609.347	0.278159	0.250084	0.316765	3.82032	4.21336	3.5824	0.0022841	0.000881882	0.00298811	1.1982e-06	0.000196825
NM_001100452	Gltscr1l	3225	208	299	262	41	1	40	21	7	14	71	1	70	255.831	0.474816	0.424678	0.600705	3.80536	2.4677	3.49033	0.000426044	0.0301751	0.000488302	1.24441e-06	0.000199979
NM_011602	Tln1	7626	57	111	114	7	1	6	10	0	10	34	1	33	90.5753	0.841	0.748223	1.30065	2.059	2.79937	3.42706	0.0435986	0.00795509	1.85713e-05	1.27354e-06	0.000201132
NM_009569	Zfpm1	2988	126	195	171	18	2	16	18	1	17	49	0	49	162.68	0.614068	0.548125	0.813279	2.88576	3.07045	3.42003	0.00697179	0.00522446	0.000191791	1.36999e-06	0.000212697
NM_008904	Ppargc1a	2394	164	260	222	34	0	34	15	0	15	53	1	52	213.588	0.526945	0.470912	0.679357	3.7168	2.69622	3.24214	0.000437573	0.0173098	0.000950801	1.408e-06	0.000214954
NM_001290760	Tbc1d9b	3792	870	1658	1654	168	9	159	153	22	131	355	10	345	1348.18	0.167746	0.15426	0.168728	4.48307	4.35809	4.17617	0.00126963	0.00229778	0.00285	1.60205e-06	0.00024057
NM_001005424	Gm996	2925	198	354	260	25	3	22	26	5	21	94	2	92	268.692	0.461379	0.412756	0.580629	2.93339	2.98343	3.83255	0.00952728	0.0104585	9.61619e-05	1.81968e-06	0.000264575
NM_026361	Pkp4	3573	1304	2047	2247	265	12	253	158	19	139	457	6	451	1818.4	0.140067	0.129815	0.13493	4.91819	4.21846	4.27385	0.000560862	0.00461946	0.00369548	1.81846e-06	0.000264575
NM_001128084	Arhgap21	5868	979	1399	1480	168	12	156	138	19	119	307	4	303	1266.34	0.174318	0.160032	0.176997	4.50425	4.26758	4.04972	0.00105633	0.00266579	0.00351057	1.87139e-06	0.000267842
NM_001253905	Ncor2	6762	483	867	594	79	6	73	62	7	55	177	4	173	645.98	0.267751	0.241032	0.302458	3.94018	3.67313	3.89236	0.0017448	0.00492123	0.0012606	2.03004e-06	0.000281745
NM_001083587	Tns3	4323	93	255	170	12	0	12	14	0	14	60	2	58	167.407	0.604398	0.539559	0.798266	2.47656	2.78592	3.63125	0.0208972	0.0119493	5.83445e-05	2.6493e-06	0.000362202
NM_001040682	Clmn	3066	96	221	148	21	1	20	17	3	14	38	1	37	151.964	0.637562	0.568935	0.851243	3.24336	2.85855	3.08966	0.001902	0.0092062	0.000888327	2.80918e-06	0.000378413
NM_001144953	Vwa5b2	3747	84	128	102	9	0	9	12	1	11	32	0	32	104.653	0.779111	0.694205	1.13952	2.46173	2.8165	3.24499	0.0176916	0.0081583	0.000126704	3.2468e-06	0.000431024
NM_001291452	Lrrc7	4488	1400	2337	2246	239	11	228	186	28	158	484	12	472	1953.45	0.134253	0.12465	0.12805	4.71325	4.34831	4.27044	0.00122899	0.00375694	0.00413327	3.37295e-06	0.000441375
NM_001002004	2610507B11Rik	6705	2234	3469	3658	313	32	281	303	45	258	862	19	843	3052.69	0.10373	0.0973406	0.093291	4.66799	4.71725	4.67632	0.00263308	0.00269839	0.00317012	3.91109e-06	0.000499271
NM_013883	Scmh1	1995	69	187	129	15	0	15	14	1	13	30	0	30	124.253	0.711163	0.634095	0.987593	3.0069	2.91008	2.98963	0.0037051	0.00685658	0.000889997	3.9244e-06	0.000499271
NM_010897	Nf1	8526	2386	3206	4256	366	30	336	292	38	254	796	14	782	3191.23	0.101161	0.0950254	0.0904748	4.89069	4.66149	4.52539	0.00161921	0.00320176	0.00455143	4.07687e-06	0.000511563
NM_007881	Atn1	3528	208	519	259	28	0	28	24	1	23	104	4	100	325.997	0.411326	0.36833	0.50661	3.11815	2.9639	3.7656	0.00711072	0.0128506	0.000272692	4.28006e-06	0.000526999
NM_001081370	Shank2	3789	560	883	678	72	6	66	67	9	58	192	2	190	706.732	0.252403	0.227831	0.281446	3.72723	3.68097	3.94036	0.00379408	0.00539799	0.00135596	4.71452e-06	0.000568224
NM_001160222	Pum2	2958	1099	1675	1918	174	19	155	131	16	115	415	5	410	1522.72	0.155778	0.143718	0.153907	4.3523	4.08032	4.3074	0.00225618	0.00516549	0.00253701	4.98545e-06	0.00058547
NM_021423	Shank3	5193	434	798	536	49	1	48	54	4	50	168	3	165	587.154	0.28494	0.256042	0.326133	3.41936	3.60984	3.91632	0.00650497	0.00510675	0.000887695	4.97367e-06	0.00058547
NM_001025432	Crebbp	7326	1309	1971	1754	179	12	167	138	13	125	432	11	421	1666.46	0.14755	0.136446	0.143898	4.38938	4.13193	4.25872	0.00233802	0.00507692	0.00334134	6.47564e-06	0.000738781
NM_001042743	Mast2	5403	717	1230	1125	114	5	109	78	8	70	255	5	250	1004.48	0.20138	0.183683	0.211975	4.17032	3.68426	3.99622	0.00192086	0.00782827	0.00261123	6.41803e-06	0.000738781
NM_001080819	Arid1a	6852	765	1169	997	100	3	97	84	10	74	246	2	244	972.049	0.205598	0.187354	0.217557	4.02909	3.78796	3.99289	0.00271719	0.00607067	0.00246208	6.61354e-06	0.000738781
NM_021287	Sptbn2	7167	6624	7478	8272	599	37	562	688	72	616	1675	24	1651	7469.13	0.0639707	0.0612773	0.052375	4.97274	5.29817	4.78435	0.00342972	0.00191834	0.00610139	6.54557e-06	0.000738781
NM_001290421	Flna	5967	52	116	127	8	2	6	12	5	7	33	1	32	93.4296	0.827019	0.73635	1.26307	2.03498	2.31666	3.35414	0.0459349	0.0288468	3.7579e-05	7.92704e-06	0.000874839
NM_001160319	Ubr4	15543	2224	2494	2962	241	12	229	206	25	181	687	11	676	2550.91	0.114925	0.107398	0.105766	4.51295	4.34298	4.53101	0.00303375	0.00496893	0.0033978	8.12819e-06	0.000886359
NM_001081045	Kansl1	3111	411	640	652	66	4	62	45	5	40	125	5	120	556.681	0.294911	0.264887	0.339977	3.82319	3.33496	3.51142	0.00192727	0.00918728	0.00306457	8.55537e-06	0.000921967
NM_001242558	Ncoa6	3234	259	441	319	34	1	33	28	3	25	82	0	82	338.808	0.401883	0.359946	0.492791	3.31779	3.05045	3.44535	0.00424108	0.0109037	0.00124527	9.01874e-06	0.00094248
NM_007868	Dmd	11037	416	718	764	63	2	61	55	7	48	140	3	137	613.458	0.276944	0.249021	0.31509	3.72492	3.51924	3.60764	0.00306755	0.00671158	0.00280951	9.05439e-06	0.00094248
NM_010432	Hipk1	3633	620	1152	1092	98	7	91	63	11	52	258	5	253	928.44	0.211671	0.192631	0.225653	3.97347	3.32151	4.0891	0.00294581	0.0145596	0.00167083	1.09481e-05	0.00111427
NM_007923	Elk4	1293	25	51	38	6	0	6	2	0	2	11	0	11	37.3182	1.55443	1.27448	3.73194	2.74545	1.59026	2.77767	0.00465725	0.119576	0.0001311	1.11301e-05	0.00112035
NM_001110253	Fyco1	4314	87	167	166	17	1	16	11	0	11	31	0	31	135.363	0.679074	0.605692	0.924769	3.02807	2.62342	2.95304	0.00371976	0.0159081	0.00128919	1.15716e-05	0.00113974
NM_008306	Ndst1	2649	371	561	575	49	4	45	38	4	34	123	1	122	493.552	0.31846	0.285827	0.372968	3.46265	3.19701	3.65088	0.00464798	0.0110417	0.00147337	1.14813e-05	0.00113974
NM_008614	Mobp	246	16	46	43	3	0	3	4	1	3	11	0	11	33.1034	1.72376	1.39495	4.44429	2.03088	2.09522	2.89298	0.0461927	0.0463031	4.21132e-05	1.34039e-05	0.00127973
NM_027707	Nipbl	8397	559	932	937	71	4	67	71	7	64	183	4	179	790.19	0.234723	0.212594	0.257014	3.66219	3.73694	3.74739	0.0052334	0.0053985	0.00319036	1.3412e-05	0.00127973
NM_021494	Dennd5a	3864	1685	2442	2827	191	13	178	196	22	174	539	11	528	2264.08	0.123135	0.114743	0.11512	4.24362	4.3759	4.28988	0.00478943	0.00413872	0.00482553	1.41352e-05	0.00133483
NM_001159591	Csnk1g2	1248	228	312	382	27	2	25	35	5	30	61	2	59	300.274	0.432051	0.386728	0.537106	3.02424	3.39481	3.09336	0.00836689	0.00385299	0.00343255	1.60769e-05	0.00149626
NM_008634	Map1b	7395	12671	16119	19284	1237	65	1172	882	100	782	2639	59	2580	15782.6	0.0446369	0.0433877	0.0344382	5.45256	5.08054	4.70828	0.00249462	0.00482773	0.00924937	1.61713e-05	0.00149626
NM_001167777	Asxl3	6615	79	142	122	14	0	14	8	3	5	30	0	30	112.251	0.750775	0.669143	1.07289	2.99244	1.76391	3.08736	0.00357518	0.0816195	0.000407615	1.71351e-05	0.00155403
NM_031186	Ndst3	2622	154	221	252	20	1	19	21	1	20	40	0	40	204.545	0.540091	0.482567	0.699373	2.94293	3.121	2.91339	0.00721663	0.00560354	0.00324211	1.86715e-05	0.00167525
NM_012005	Med14	4314	712	1073	1073	99	1	98	61	7	54	204	3	201	938.002	0.210297	0.191438	0.223816	4.07133	3.36726	3.74877	0.00227953	0.013536	0.00440636	1.92797e-05	0.0016981
NM_020283	B3galt1	981	49	98	58	11	0	11	7	0	7	12	0	12	68.1791	0.99504	0.866718	1.74156	3.05651	2.55308	2.31332	0.00182313	0.0148707	0.00550086	2.09166e-05	0.00182473
NM_001033481	Myrf	3339	28	95	47	7	1	6	2	3	0	19	0	19	55.1809	1.1476	0.979567	2.22546	2.44265	-0.288201	3.13832	0.0152122	0.547458	1.96664e-05	2.27151e-05	0.001957
NM_001286260	Nfat5	3678	331	473	457	51	2	49	29	5	24	78	1	77	416.741	0.354067	0.317474	0.423584	3.71391	2.83852	3.15652	0.00163984	0.0198628	0.00506485	2.28601e-05	0.001957
NM_010657	Hivep3	7047	246	473	323	35	1	34	21	3	18	81	1	80	344.523	0.397839	0.356355	0.486887	3.34666	2.58539	3.39406	0.00397811	0.028152	0.00157734	2.4278e-05	0.00202044
NM_018814	Pcnx	7035	1501	2324	2333	175	8	167	147	17	130	443	8	435	2016.08	0.13178	0.122451	0.125149	4.24193	4.04517	4.12256	0.00424427	0.00717539	0.0058563	2.44834e-05	0.00202044
NM_001001152	Zfp458	2259	49	92	129	12	1	11	12	3	9	16	1	15	84.9092	0.871753	0.773431	1.38476	2.88662	2.71034	2.40175	0.00428292	0.0101252	0.005381	3.10048e-05	0.00240258
NM_001282093	Wac	1806	375	553	659	60	4	56	24	2	22	112	2	110	514.795	0.31005	0.27835	0.36114	3.73935	2.55967	3.46223	0.00219299	0.0352839	0.00303005	3.11338e-05	0.00240258
NM_010437	Hivep2	7293	6825	9851	10165	703	33	670	476	38	438	1377	15	1362	8819.61	0.0588597	0.0565811	0.0475134	5.09726	4.68241	4.34702	0.00310275	0.00656112	0.0115502	3.12126e-05	0.00240258
NM_054050	Rapgef1	3261	415	710	655	57	2	55	33	3	30	131	1	130	581.787	0.286638	0.257542	0.328486	3.61911	2.89851	3.58354	0.00381418	0.0220633	0.00269883	3.02765e-05	0.00240258
NM_013881	Ulk2	3114	725	1155	1249	104	6	98	62	7	55	215	4	211	1016.38	0.199892	0.182387	0.210014	4.00921	3.33304	3.74127	0.00306777	0.0151811	0.00513755	3.16935e-05	0.00241927
NM_001033550	Lrrc8b	2412	386	612	541	45	2	43	33	1	32	109	2	107	507.59	0.312843	0.280833	0.365062	3.37681	3.09108	3.43626	0.00605059	0.0140809	0.00318827	3.54232e-05	0.00268162
NM_001081383	Kmt2c	14715	1299	1777	1868	143	15	128	129	12	117	302	4	298	1629.51	0.149547	0.138213	0.146313	4.02565	4.05412	3.78319	0.00536793	0.00583696	0.00879541	3.58739e-05	0.00269348
NM_001081049	Kmt2a	11892	648	1140	1035	100	5	95	73	12	61	144	3	141	921.77	0.212644	0.193476	0.226957	4.04046	3.55319	3.2571	0.00241864	0.0094199	0.0126168	3.72242e-05	0.00277214
NM_013697	Ttr	444	79	131	57	7	1	6	8	1	7	27	2	25	91.615	0.835799	0.743838	1.28663	2.05017	2.33138	3.02905	0.0444512	0.027793	0.000301371	4.66801e-05	0.00330157
NM_133500	Ntng2	1593	130	198	167	13	1	12	14	1	13	39	1	38	164.337	0.610633	0.545083	0.807938	2.49089	2.70027	3.05182	0.020032	0.0146386	0.00124487	4.58819e-05	0.00330157
NM_001166164	Ccdc74a	1095	14	21	25	2	0	2	3	1	2	7	0	7	19.4379	2.89769	2.2031	9.93968	2.02802	2.07969	2.82027	0.0560723	0.0561106	0.000120377	4.73819e-05	0.00331311
NM_001271679	Wnk3	5133	394	493	718	42	5	37	33	3	30	123	2	121	519.223	0.308363	0.27685	0.358773	3.14776	2.98388	3.59031	0.0107057	0.017602	0.00204923	4.81927e-05	0.00334428
NM_001122768	Lrrc8d	2580	121	270	221	19	0	19	12	1	11	44	1	43	197.838	0.550397	0.491704	0.715114	2.96874	2.33866	3.04735	0.00648534	0.0344743	0.001831	5.07131e-05	0.00346546
NM_010137	Epas1	2625	31	179	89	5	0	5	13	2	11	25	3	22	94.6201	0.821456	0.731548	1.24823	1.80279	2.89212	2.82112	0.0707962	0.00606481	0.00103061	5.42786e-05	0.00365583
NM_001013806	Ankrd13c	1626	265	398	400	32	4	28	19	3	16	83	2	81	348.845	0.394846	0.353698	0.482524	3.06571	2.41557	3.39977	0.00874315	0.03752	0.00158957	6.26304e-05	0.00418755
NM_011767	Zfr	3225	2989	4384	5176	346	30	316	222	20	202	612	10	602	4075.44	0.0882541	0.0833489	0.0766342	4.61308	4.14895	3.91323	0.00403238	0.00968025	0.0142154	6.61148e-05	0.00434864
NM_020027	Prrc2a	6477	1457	2940	1920	153	10	143	138	21	117	417	7	410	2087.04	0.129131	0.120092	0.122056	3.99276	3.86843	4.00409	0.00728296	0.0100431	0.00761914	6.63635e-05	0.00434864
NM_001081017	Unc79	7791	628	860	968	74	6	68	56	8	48	143	2	141	805.145	0.231897	0.210153	0.253117	3.66874	3.31521	3.38725	0.0052765	0.0132632	0.00811202	6.74421e-05	0.00438135
NM_010414	Htt	9363	2028	2594	2902	171	8	163	152	12	140	487	11	476	2482.09	0.11675	0.109033	0.107831	4.04619	3.99526	4.05215	0.00762898	0.00913893	0.00829498	6.85396e-05	0.00442129
NM_008960	Pten	1212	830	1208	1625	113	7	106	71	8	63	202	6	196	1178.01	0.182282	0.167011	0.187137	4.00707	3.41494	3.49341	0.00379656	0.0145875	0.0105999	6.94377e-05	0.0044479
NM_001100591	Rc3h2	3564	668	1201	1289	87	6	81	71	5	66	168	3	165	1016.92	0.199825	0.182329	0.209925	3.73699	3.59137	3.38787	0.0059793	0.00952777	0.0109766	7.3361e-05	0.00465033
NM_001163542	Plec	13770	1204	1193	1421	90	7	83	100	18	82	254	4	250	1282.3	0.17298	0.158857	0.175306	3.59225	3.72633	3.76128	0.0101466	0.008962	0.00690397	7.36134e-05	0.00465033
NM_001294150	Kif1a	5097	10124	15672	14556	768	47	721	606	91	515	1767	25	1742	13287	0.0483326	0.0468351	0.0377713	4.88568	4.60805	4.30752	0.00573509	0.00859331	0.0133005	7.64284e-05	0.00479509
NM_001253369	Kcnma1	3630	1363	2024	2070	126	7	119	134	16	118	301	1	300	1790.13	0.141378	0.130978	0.136492	3.84853	3.99576	3.70236	0.00835785	0.00712935	0.0111184	7.7138e-05	0.00480669
NM_027293	Dopey2	6888	899	1156	1215	89	9	80	64	6	58	217	4	213	1083.48	0.19203	0.175532	0.199725	3.67021	3.36035	3.6933	0.00741669	0.0151247	0.00632704	8.18951e-05	0.00506864
NM_009769	Klf5	1341	21	31	20	3	1	2	2	0	2	8	0	8	24.3949	2.29387	1.79262	7.01702	1.85217	1.90925	2.77164	0.0763033	0.0751916	0.000125163	8.27331e-05	0.00508614
NM_028601	Zmiz2	2763	543	792	646	59	3	56	34	10	24	151	5	146	661.572	0.26359	0.237444	0.296765	3.54516	2.49173	3.62614	0.00554266	0.042451	0.00311816	8.42888e-05	0.00514724
NM_054040	Tulp4	4644	820	1203	1185	88	5	83	65	9	56	199	6	193	1056.37	0.195102	0.178212	0.20373	3.74229	3.32961	3.57613	0.00617196	0.0156559	0.00786874	8.69419e-05	0.00527409
NM_022656	Nisch	4782	3385	5161	5139	296	16	280	249	21	228	703	13	690	4488.64	0.0836873	0.0792092	0.0719111	4.36441	4.25035	4.01684	0.00685382	0.00876934	0.0130755	8.94716e-05	0.00539184
NM_025943	Dzip1	2559	118	216	203	13	0	13	14	2	12	38	1	37	174.384	0.590826	0.527534	0.777264	2.55186	2.54883	2.95725	0.0179041	0.0214487	0.00207429	9.05262e-05	0.00541974
NM_008982	Ptprj	4053	1580	1830	2407	172	13	159	108	12	96	292	6	286	1910.59	0.136023	0.126224	0.130136	4.21315	3.65198	3.57099	0.00425655	0.013434	0.014448	9.34378e-05	0.00555773
NM_001168572	Brsk1	1032	413	580	570	41	1	40	39	3	36	83	2	81	516.643	0.309344	0.277722	0.360148	3.26124	3.24287	3.02192	0.00821296	0.0104395	0.00999562	9.64549e-05	0.00566363
NM_009481	Usp9x	7665	5656	6406	9240	430	36	394	353	45	308	1056	30	1026	6956.6	0.0663322	0.0634399	0.05465	4.51649	4.35385	4.16697	0.00708403	0.00936334	0.0130566	9.73356e-05	0.00567894
NM_009706	Arhgap5	4512	1381	2132	2833	161	16	145	123	23	100	361	6	355	2033.38	0.13112	0.121863	0.124377	4.03283	3.66354	3.82189	0.00659161	0.0136712	0.0102054	0.000102537	0.00590715
NM_001081170	Pacs2	2679	218	429	372	22	3	19	25	4	21	74	2	72	331.029	0.407553	0.36498	0.501083	2.57024	2.82687	3.28248	0.0248788	0.017419	0.00216964	0.000104522	0.00598387
NM_001173506	Map1a	8331	15152	20270	20599	744	49	695	764	84	680	2306	47	2259	18546.8	0.0414937	0.0404441	0.0316331	4.57458	4.75808	4.36139	0.0096861	0.00794475	0.0133038	0.000112515	0.00636193
NM_001290486	Lpar1	1041	7	16	19	2	0	2	1	2	0	6	0	6	13.2016	4.49617	3.25425	18.2829	2.32753	0.785038	2.99985	0.0314043	0.413758	7.83012e-05	0.000111911	0.00636193
NM_013675	Sptb	6990	1227	1352	1353	84	3	81	84	8	76	255	6	249	1325.71	0.169481	0.155784	0.170902	3.5317	3.59309	3.72349	0.0116422	0.0116987	0.00778261	0.000115949	0.00651593
NM_001024857	Ttbk2	3732	709	1042	1230	69	5	64	60	5	55	180	2	178	967.972	0.206146	0.18783	0.218284	3.44	3.36965	3.54411	0.0106094	0.0137878	0.00747385	0.000119094	0.00661387
NM_030595	Nbea	8811	6239	7776	10164	435	22	413	377	48	329	1124	30	1094	7895.09	0.0622034	0.0596558	0.0506843	4.4863	4.35375	4.13771	0.00791865	0.0098583	0.0140107	0.000119136	0.00661387
NM_011162	Mapk8ip1	2124	979	1352	1436	88	2	86	70	6	64	227	4	223	1239.61	0.176625	0.162055	0.17992	3.66908	3.39906	3.62967	0.00849136	0.0154556	0.00864298	0.000122947	0.00670356
NM_001081035	Nav3	7101	1324	1587	1868	119	12	107	96	11	85	268	4	264	1579.11	0.152399	0.140734	0.149778	3.79363	3.62132	3.63927	0.008313	0.01256	0.0110194	0.000124469	0.00674636
NM_019923	Itpr2	8106	93	156	183	10	0	10	9	1	8	33	1	32	138.895	0.669649	0.597348	0.90733	2.38009	2.18906	2.97264	0.0240125	0.0409587	0.00124798	0.000131622	0.00700964
NM_133189	Cacng7	828	47	98	98	10	0	10	6	1	5	14	0	14	77.8244	0.917012	0.808497	1.51211	2.82854	2.03876	2.39246	0.00498798	0.0504575	0.00485818	0.000131186	0.00700964
NM_133207	Kcnh7	3588	707	962	1193	81	7	74	50	5	45	158	2	156	931.573	0.211218	0.192238	0.225047	3.67612	3.11462	3.3918	0.00619938	0.0204785	0.009794	0.0001331	0.00704737
NM_008224	Hcfc1	6138	988	1475	1508	106	7	99	67	9	58	230	3	227	1302.13	0.171357	0.157433	0.17326	3.83191	3.22242	3.60787	0.00638624	0.0207353	0.00954711	0.000135025	0.0071082
NM_001099628	Atad2b	4383	72	104	119	4	0	4	10	1	9	23	0	23	96.1598	0.814479	0.725462	1.22971	1.52726	2.61698	2.86699	0.109014	0.0138685	0.000851035	0.000137089	0.00717565
NM_001290656	Mbd5	4497	446	689	585	41	4	37	39	4	35	103	2	101	570.103	0.29042	0.260893	0.333732	3.07539	3.12946	3.24206	0.0136029	0.0143439	0.00675098	0.000139898	0.00728103
NM_009622	Adcy1	3357	3365	3903	4928	246	14	232	222	16	206	544	12	532	4018.73	0.0889402	0.0839715	0.0773524	4.17978	4.18762	3.74869	0.00859138	0.00906401	0.0172058	0.000141968	0.00734706
NM_001033173	Usp31	4035	785	1061	1151	73	4	69	63	9	54	168	8	160	986.405	0.203702	0.185704	0.215043	3.53231	3.3295	3.37306	0.00898271	0.0149701	0.010903	0.000153438	0.00755641
NM_001040398	Setd1b	5958	128	292	181	16	1	15	14	3	11	41	1	40	197.464	0.550986	0.492226	0.716015	2.64828	2.34008	2.94729	0.0153049	0.0343611	0.0026921	0.00014888	0.00755641
NM_001080931	Med13	6516	947	1591	1811	99	8	91	90	5	85	214	8	206	1401.35	0.163831	0.150816	0.163845	3.65476	3.71093	3.39781	0.00973588	0.00990065	0.0148345	0.000150163	0.00755641
NM_001143849	Pde2a	2787	4426	5418	6250	351	13	338	237	20	217	645	11	634	5316.63	0.0763554	0.0725723	0.0645039	4.50406	4.05231	3.73203	0.00610582	0.0124931	0.0191655	0.00015306	0.00755641
NM_001276465	Vps13d	13170	1934	2478	2989	165	10	155	120	17	103	439	12	427	2426.64	0.118283	0.110405	0.109571	3.99153	3.5731	3.91751	0.00825861	0.0169578	0.0101574	0.000149493	0.00755641
NM_019763	Spen	10932	663	1083	1049	72	5	67	56	9	47	154	3	151	913.594	0.213853	0.194526	0.22858	3.54985	3.19064	3.36385	0.00801425	0.0179481	0.0101167	0.000152449	0.00755641
NM_030238	Dync1h1	13935	7725	8113	11016	445	25	420	407	51	356	1131	23	1108	8874.44	0.0586795	0.0564151	0.0473435	4.41996	4.37946	4.04353	0.00915045	0.00996187	0.015839	0.000151421	0.00755641
NM_001081371	Dmxl1	9042	1469	2050	2713	140	14	126	113	13	100	337	9	328	2013.68	0.131873	0.122533	0.125257	3.83922	3.67085	3.71747	0.00934617	0.0134479	0.0119958	0.000157179	0.00769927
NM_001039386	Nsmf	1599	1549	2044	2457	126	7	119	119	16	103	329	7	322	1979.26	0.133218	0.12373	0.126834	3.77078	3.72601	3.7075	0.0103847	0.0122251	0.0120174	0.000158792	0.00773688
NM_133769	Cyfip2	3762	8272	13109	12576	591	32	559	407	31	376	1247	24	1223	11133.9	0.0525484	0.0507506	0.0416286	4.65597	4.2879	3.96765	0.00732496	0.0119222	0.0175932	0.000159754	0.00774258
NM_001159634	Prrc2b	6693	3463	5217	4404	263	12	251	221	39	182	639	15	624	4347.42	0.0851682	0.0805496	0.0734317	4.23201	3.95084	3.90277	0.00831376	0.0131519	0.0148227	0.00016728	0.00806466
NM_001033263	Agap2	3561	5559	9403	8206	354	17	337	375	51	324	1018	25	993	7609.17	0.0633716	0.0607279	0.0518007	4.22225	4.3594	4.03359	0.0111266	0.00964506	0.0154514	0.000170604	0.00813922
NM_001291137	Ralgapb	4524	1214	1795	2048	123	7	116	88	9	79	258	10	248	1645.65	0.148666	0.137433	0.145246	3.87716	3.48601	3.50971	0.00734486	0.0158966	0.0141589	0.000170158	0.00813922
NM_010748	Lyst	11364	1441	1555	2394	122	10	112	103	16	87	290	11	279	1757.99	0.142911	0.132338	0.138323	3.77585	3.57397	3.61546	0.00940265	0.0144372	0.0126259	0.000175528	0.00833077
NM_021356	Gab1	2088	15	85	68	5	0	5	1	2	0	15	0	15	51.819	1.20075	1.01858	2.40476	2.26892	-0.241033	2.87687	0.0246515	0.543675	0.00012877	0.000176575	0.00833728
NM_029166	Uhrf1bp1l	4374	1116	1588	1935	101	4	97	78	10	68	269	4	265	1506.53	0.156789	0.144609	0.155146	3.68988	3.33889	3.68997	0.00969347	0.0188387	0.00960299	0.00017902	0.00840935
NM_001267872	Zdbf2	7482	531	868	843	54	2	52	43	6	37	125	2	123	732.651	0.246534	0.222779	0.273362	3.36118	3.01923	3.28248	0.00953448	0.0207607	0.008942	0.000180458	0.00843363
NM_008632	Map2	1404	1808	1482	2117	125	8	117	105	15	90	270	4	266	1821.33	0.139934	0.129697	0.134771	3.81091	3.59577	3.51281	0.00908221	0.0142466	0.0152279	0.000197885	0.00910869
NM_011245	Rasgrf1	3789	5658	8492	8971	456	27	429	286	25	261	802	9	793	7559.54	0.0635818	0.0609207	0.0520021	4.57463	4.05343	3.71577	0.00679388	0.0140077	0.0208464	0.000199053	0.00911662
NM_020009	Mtor	7650	830	904	993	56	2	54	56	11	45	171	1	170	913.815	0.21382	0.194497	0.228535	3.24356	3.12906	3.53354	0.0146054	0.0198075	0.00704009	0.000203595	0.00927826
NM_001081116	Arhgef17	6174	1172	1908	1665	94	4	90	88	15	73	279	1	278	1563.13	0.153336	0.141561	0.15092	3.55441	3.41214	3.72333	0.0126442	0.0172584	0.0093929	0.000204712	0.009283
NM_001033536	Rfx7	4380	176	281	270	15	1	14	14	1	13	51	1	50	238.202	0.494926	0.442517	0.630906	2.40997	2.42173	3.0817	0.028548	0.0318184	0.00230376	0.000208388	0.00940314
NM_011807	Dlg2	2559	2018	2377	3452	178	14	164	131	14	117	341	7	334	2552.34	0.114888	0.107365	0.105724	4.03335	3.71741	3.51547	0.00797843	0.014224	0.018632	0.000210253	0.00944079
NM_028816	Xpo6	3375	584	852	899	64	3	61	41	12	29	133	4	129	765.277	0.239645	0.216842	0.263832	3.55373	2.6455	3.30873	0.00651555	0.036538	0.00897406	0.000212126	0.00946928
NM_029935	Chst15	1686	190	222	293	17	1	16	20	0	20	32	0	32	231.312	0.503386	0.450021	0.643666	2.61326	3.02872	2.48191	0.0183596	0.00816695	0.0143131	0.000212955	0.00946928
NM_001252313	Ncor1	7365	2531	4340	4370	222	13	209	170	10	160	480	8	472	3650.04	0.0938215	0.0883948	0.0825285	4.10433	3.89725	3.66897	0.00910701	0.0131042	0.0181637	0.000214787	0.00950458
NM_027882	Cic	4815	549	964	725	55	5	50	36	6	30	144	6	138	740.426	0.244844	0.221324	0.271028	3.29751	2.71758	3.43707	0.011001	0.0327683	0.00634732	0.000224987	0.00990809
NM_001081290	Prrc2c	8541	1454	2185	2349	138	12	126	98	15	83	299	7	292	1955	0.13419	0.124594	0.127976	3.86212	3.42714	3.57873	0.00876778	0.0187933	0.0145222	0.000233795	0.0102467
NM_016965	Nckap1	3387	9552	14281	18092	582	49	533	473	46	427	1331	28	1303	13519.1	0.0479436	0.0464728	0.0374183	4.43712	4.3253	3.87223	0.010388	0.0119994	0.01933	0.000235184	0.0102585
NM_019472	Myo10	6189	91	231	151	11	1	10	15	4	11	29	0	29	153.802	0.633366	0.565219	0.844275	2.30117	2.5276	2.73706	0.0296559	0.021191	0.00393486	0.000240472	0.0104394
NM_001289895	Tns1	5604	69	122	103	4	0	4	3	1	2	31	1	30	96.4535	0.813175	0.724317	1.22626	1.5249	0.877722	3.23329	0.109361	0.233625	0.00010025	0.000247829	0.0107081
NM_001039546	Myo6	3789	166	376	452	20	5	15	22	3	19	66	4	62	312.337	0.422019	0.377823	0.522316	2.29331	2.73299	3.12586	0.039557	0.0202584	0.00331434	0.000255651	0.0108919
NM_029525	Prex2	4797	230	588	710	24	2	22	34	7	27	103	9	94	476.39	0.325662	0.29223	0.383137	2.49005	2.90164	3.31227	0.0344837	0.0193022	0.0040877	0.000260985	0.0110677
NM_001029934	Usp32	4815	1538	2564	2783	128	9	119	127	12	115	303	5	298	2227.89	0.124296	0.115779	0.116456	3.67917	3.79476	3.48226	0.0130295	0.0117827	0.0180958	0.000265681	0.0112149
NM_007566	Birc6	14622	3615	4465	5922	231	20	211	194	25	169	700	12	688	4570.1	0.0828671	0.0784678	0.0710735	3.94398	3.80705	3.99535	0.0129513	0.0160371	0.013541	0.000268492	0.0112773
NM_008226	Hcn2	2592	429	693	548	41	3	38	31	5	26	96	5	91	554.268	0.295736	0.265621	0.341126	3.13467	2.73556	3.1203	0.0117234	0.0279697	0.00873012	0.000272581	0.0112773
NM_010418	Herc2	14511	7623	7417	11000	362	34	328	352	44	308	1038	13	1025	8601.37	0.0595955	0.0572585	0.048208	4.08843	4.19459	3.96137	0.0136183	0.0123503	0.0170231	0.00027262	0.0112773
NM_010434	Hipk3	3579	724	957	1194	61	3	58	59	5	54	133	3	130	937.621	0.210352	0.191486	0.223889	3.32494	3.36756	3.12437	0.0128497	0.0135247	0.0163648	0.000271064	0.0112773
NM_001045524	Cep126	3312	102	165	220	16	0	16	11	3	8	24	0	24	155.441	0.629682	0.561957	0.838226	2.92099	2.1046	2.46382	0.00601779	0.0488465	0.00994104	0.000277422	0.0112942
NM_001081064	Pdzd2	8391	456	452	553	32	5	27	28	3	25	96	5	91	489.603	0.320083	0.28727	0.375257	2.75266	2.77419	3.23965	0.0225036	0.024567	0.0052821	0.000277263	0.0112942
NM_023543	Chn2	999	32	36	47	5	0	5	2	0	2	8	0	8	37.8926	1.53462	1.2603	3.65163	2.51124	1.5788	2.34794	0.0112782	0.121332	0.0023308	0.000298979	0.0121179
NM_001286263	Ralgapa1	6249	2568	3285	4542	190	11	179	153	15	138	438	7	431	3371.1	0.098088	0.092252	0.0871296	3.94349	3.74493	3.61465	0.0111167	0.0155052	0.0187376	0.000302198	0.0121944
NM_001093750	Ptchd1	2667	44	99	83	11	0	11	3	0	3	11	0	11	72.898	0.954087	0.836203	1.61958	3.0047	1.50286	2.13345	0.00240894	0.121795	0.0119202	0.000323449	0.0128817
NM_026376	Plxnd1	5778	415	505	412	34	0	34	21	2	19	71	0	71	451.787	0.336695	0.302037	0.398785	3.13682	2.456	2.96335	0.00955893	0.0389816	0.00958749	0.000329372	0.0130045
NM_026984	Kmt2e	5607	727	1246	1267	86	4	82	44	7	37	150	2	148	1051.33	0.195689	0.178724	0.204498	3.72872	2.74824	3.19999	0.00632645	0.035631	0.0159933	0.00033194	0.0130496
NM_001142642	Fbrsl1	3096	83	160	104	9	0	9	8	0	8	20	0	20	115.065	0.740962	0.660462	1.05093	2.38831	2.33029	2.50166	0.0219866	0.0294253	0.00593927	0.000350481	0.0136613
NM_001164503	Akap11	5685	6681	8454	11821	394	23	371	303	30	273	844	16	828	8741.72	0.0591188	0.0568197	0.0477578	4.25311	4.00902	3.63822	0.0112616	0.0152576	0.022611	0.000353794	0.013732
NM_019588	Plce1	6849	101	163	179	4	2	2	13	2	11	36	0	36	143.583	0.657659	0.586733	0.885785	0.479929	2.57919	3.10577	0.298191	0.0182236	0.000720542	0.00035615	0.0137651
NM_001136260	Slc4a4	3285	274	445	544	27	3	24	26	4	22	67	1	66	405.777	0.359957	0.322708	0.432036	2.73455	2.73823	2.96286	0.0205893	0.0234743	0.00825923	0.000362057	0.0138185
NM_011273	Xpr1	2088	334	486	541	35	2	33	27	6	21	65	1	64	444.322	0.340223	0.305172	0.403805	3.1079	2.60601	2.83183	0.0100564	0.0307861	0.0128061	0.000359961	0.0138185
NM_011571	Tesk1	1884	166	218	291	14	1	13	13	1	12	42	1	41	219.052	0.519388	0.464211	0.667882	2.37531	2.37771	2.88223	0.0294078	0.0333353	0.00405297	0.000360616	0.0138185
NM_001015681	E130308A19Rik	2151	28	42	40	0	1	0	5	0	5	10	1	9	36.2468	1.59327	1.30222	3.89141	-0.0393484	2.61212	2.54267	0.547528	0.0108294	0.000695606	0.000372282	0.0141498
NM_001012625	Rims1	3648	397	534	549	34	7	27	27	3	24	86	1	85	489.323	0.320199	0.287373	0.37542	2.75311	2.71804	3.1429	0.0224774	0.0269596	0.00684437	0.000374054	0.0141584
NM_001122952	Nfia	1599	51	135	102	5	0	5	4	0	4	23	0	23	92.5501	0.831229	0.739953	1.27434	1.81991	1.64569	2.9038	0.0687003	0.0974988	0.000631611	0.000380424	0.0142303
NM_001080932	Foxk2	1956	265	335	360	23	0	23	17	1	16	49	1	48	318.01	0.417495	0.373808	0.515665	2.86433	2.48501	2.74597	0.0130526	0.0322297	0.010435	0.000392568	0.0145584
NM_010881	Ncoa1	4218	1472	2514	2177	114	7	107	104	8	96	254	5	249	2023.73	0.131487	0.12219	0.124806	3.60157	3.60881	3.31652	0.0138606	0.0147921	0.0213409	0.000391477	0.0145584
NM_001025572	Ankrd12	6126	898	1481	1624	95	4	91	52	2	50	166	2	164	1295.39	0.171904	0.157912	0.173948	3.71563	3.01609	3.14629	0.00807005	0.0273627	0.0206143	0.000404875	0.0148346
NM_001289472	Pitpnm2	4008	815	1238	1306	65	3	62	57	9	48	173	4	169	1097.3	0.190515	0.174209	0.197756	3.29783	3.08291	3.34904	0.0152009	0.0233273	0.0128289	0.000404654	0.0148346
NM_010585	Itpr1	8250	14015	16181	21145	549	29	520	493	48	445	1161	12	1149	16876.7	0.0432959	0.0421332	0.0332399	4.22983	4.21827	3.47749	0.01367	0.0139735	0.0253577	0.000426834	0.0154557
NM_001031814	Smg1	10977	1130	1796	2145	104	10	94	74	14	60	242	1	241	1634.91	0.14925	0.13795	0.145954	3.58171	3.09973	3.47487	0.0124649	0.0267463	0.0148765	0.000435494	0.0157052
NM_001081109	Lmtk2	4416	2490	3014	3376	154	11	143	127	10	117	365	7	358	2943.22	0.105901	0.0992947	0.0956843	3.72664	3.61049	3.4782	0.0141658	0.0174703	0.0207915	0.000449315	0.0161401
NM_001160256	Smg7	3417	565	1004	1097	64	5	59	35	4	31	128	2	126	858.085	0.222591	0.202102	0.240387	3.41781	2.65272	3.16492	0.00991177	0.0376167	0.0138801	0.000451513	0.0161557
NM_029851	Dync2h1	12921	576	656	964	42	2	40	38	4	34	111	2	109	715.669	0.250337	0.226054	0.278604	3.00897	2.91818	3.13221	0.0184825	0.0240574	0.0119633	0.000462173	0.0164089
NM_001162917	Dennd4a	5610	746	1061	1240	66	4	62	50	4	46	133	7	126	992.831	0.202868	0.184978	0.21394	3.37528	3.09786	3.02459	0.0122673	0.0217326	0.0203449	0.00046987	0.0166178
NM_007864	Dlg4	2175	3480	5816	4886	211	2	209	177	20	157	503	10	493	4674.73	0.0818484	0.0775473	0.0700372	3.91278	3.68445	3.49358	0.0136254	0.0186073	0.0235293	0.000509354	0.01761
NM_011083	Pik3c2a	5061	292	479	624	24	5	19	23	2	21	87	2	85	445.607	0.339609	0.304627	0.402932	2.34013	2.60384	3.23295	0.0421436	0.0309348	0.00456341	0.000508189	0.01761
NM_016788	Tnk2	3168	541	788	795	39	3	36	34	3	31	117	2	115	698.582	0.254327	0.229486	0.28409	2.87958	2.80703	3.23208	0.0226767	0.0281249	0.00935576	0.00050946	0.01761
NM_001146027	Rnf44	1056	44	85	72	6	0	6	7	1	6	12	2	10	65.4909	1.02123	0.886183	1.82134	2.31004	2.39062	2.11101	0.0230325	0.0227443	0.0115146	0.000514168	0.0177059
NM_029888	Zfp142	5223	174	263	225	18	0	18	11	3	8	36	0	36	219.696	0.518515	0.463437	0.666558	2.81361	1.84499	2.69654	0.0109272	0.0765882	0.00740271	0.000525932	0.0180432
NM_007499	Atm	9201	314	429	610	22	2	20	30	4	26	69	1	68	435.374	0.34457	0.309035	0.410003	2.4285	2.91673	2.93756	0.0364845	0.0176374	0.00971321	0.000529891	0.0180439
NM_009167	Shc3	1425	252	303	370	21	0	21	19	2	17	42	1	41	304.661	0.428334	0.38343	0.531621	2.772	2.59965	2.56484	0.0155578	0.0257713	0.0155507	0.000528784	0.0180439
NM_001256382	Rims2	4719	450	632	758	37	3	34	24	0	24	101	3	98	598.94	0.281291	0.25283	0.321088	2.91855	2.56636	3.15151	0.0191116	0.0371402	0.0090559	0.00054261	0.0184085
NM_001100449	Taf4b	2568	40	59	56	5	0	5	5	0	5	8	0	8	51.1582	1.2121	1.02689	2.44375	2.27886	2.35356	2.05914	0.0239562	0.0241857	0.0111927	0.000546687	0.0184784
NM_001304266	Srcap	9816	1078	1886	1719	82	11	71	72	11	61	240	5	235	1529.32	0.155372	0.143359	0.153409	3.23347	3.17329	3.50289	0.020501	0.0237835	0.0134674	0.000552493	0.0185868
NM_009572	Zhx1	2622	455	650	915	45	4	41	32	5	27	93	1	92	648.195	0.26715	0.240513	0.301636	3.1204	2.67056	2.98528	0.0138962	0.0331365	0.0143507	0.000555453	0.0185868
NM_013780	Npas3	2778	24	61	56	2	0	2	3	0	3	11	0	11	44.8403	1.33937	1.11962	2.89756	1.38091	1.86751	2.601	0.148894	0.071603	0.000620518	0.00055598	0.0185868
NM_001163480	Neurl1a	1674	217	266	282	23	0	23	11	1	10	34	0	34	254.362	0.476413	0.426095	0.603098	3.03722	2.02456	2.47541	0.00682962	0.0613167	0.0160199	0.000562598	0.018605
NM_019427	Epb41l4b	1584	39	55	53	9	0	9	3	1	2	6	0	6	48.6442	1.25839	1.06071	2.60527	3.05483	1.39137	1.74505	0.00136196	0.151002	0.0326216	0.000562618	0.018605
NM_008170	Grin2a	4395	5885	7758	8803	325	14	311	232	29	203	631	13	618	7377.43	0.0643731	0.0616461	0.0527614	4.13072	3.71074	3.38004	0.0123331	0.0200025	0.0274213	0.000566567	0.0186682
NM_029933	Bcl9	4278	263	389	287	23	4	19	14	3	11	59	1	58	315.365	0.419589	0.375667	0.518743	2.60776	1.98878	3.02194	0.022481	0.0669995	0.00470959	0.000589784	0.0192257
NM_001290313	Wnk2	6450	573	902	634	43	0	43	32	4	28	103	1	102	706.95	0.252352	0.227787	0.281376	3.12034	2.65608	3.04914	0.0149497	0.0349989	0.0139487	0.00060413	0.0194853
NM_023868	Ryr2	14901	5928	7876	10753	287	24	263	273	32	241	734	15	719	7946.84	0.0619993	0.0594685	0.0504898	3.83215	3.90138	3.52656	0.0176436	0.0167366	0.0245565	0.00060085	0.0194853
NM_010498	Ids	1659	765	1431	1196	59	6	53	61	7	54	155	6	149	1108.87	0.189272	0.173123	0.196143	3.06732	3.24169	3.15837	0.022103	0.0185412	0.0179626	0.00060854	0.0195587
NM_021450	Trpm7	5592	261	407	489	25	2	23	21	1	20	52	2	50	373.404	0.378827	0.33947	0.459255	2.74002	2.66937	2.64919	0.0192549	0.0253237	0.0158909	0.000635459	0.0203525
NM_028319	Zfp518a	4437	140	216	270	14	0	14	11	0	11	31	1	30	201.572	0.544598	0.486563	0.706252	2.53923	2.32464	2.52412	0.0199816	0.0356042	0.0110313	0.000642346	0.0204302
NM_001128308	Dock9	6129	3997	5495	6810	230	23	207	185	27	158	557	10	547	5301.99	0.076468	0.0726745	0.0646164	3.8015	3.59907	3.52211	0.0163752	0.0210191	0.0234736	0.000658295	0.020865
NM_001114664	Iqsec2	4440	1426	2795	1975	94	10	84	87	9	78	299	9	290	2041.24	0.130823	0.121599	0.12403	3.24941	3.30622	3.52732	0.0228217	0.0223771	0.0161262	0.000668999	0.0210585
NM_011749	Zfp148	2385	693	894	993	61	2	59	40	8	32	97	0	97	850.97	0.223783	0.203134	0.242008	3.42425	2.70336	2.79895	0.00970323	0.0351753	0.0257427	0.000706545	0.0220988
NM_134063	Fam208b	7149	365	588	662	34	1	33	26	3	23	70	2	68	522.52	0.307121	0.275745	0.357031	2.9824	2.60989	2.76201	0.0152472	0.0329647	0.0177941	0.000717187	0.022345
NM_001024602	Cep170b	4725	1738	3389	2695	132	5	127	102	19	83	296	5	291	2557.88	0.114745	0.107236	0.105563	3.66535	3.22546	3.3152	0.0143812	0.0263831	0.0237455	0.000721637	0.0224074
NM_001190376	Camta2	3612	2083	4080	3186	135	7	128	125	12	113	332	7	325	3059.96	0.103591	0.097215	0.0931376	3.53783	3.53154	3.30166	0.0185473	0.0195355	0.0256182	0.000739993	0.0228998
NM_001081293	Rprd2	4410	357	556	545	31	3	28	26	3	23	65	2	63	477.96	0.324987	0.29163	0.382182	2.82192	2.67678	2.73925	0.0194832	0.0284798	0.0169969	0.000749981	0.0231307
NM_001161362	Ppp2r3a	3453	238	375	512	22	5	17	15	4	11	75	4	71	359.121	0.387946	0.34757	0.472483	2.35518	1.89129	3.18421	0.0377989	0.0769986	0.00356157	0.000812035	0.0247259
NM_001281491	Syngap1	4023	2903	4311	3745	175	7	168	113	12	101	382	8	374	3638.27	0.0939906	0.0885479	0.08271	3.79347	3.24119	3.33713	0.0142991	0.0280205	0.025889	0.000812501	0.0247259
NM_011743	Zfp106	5667	1367	2265	2366	107	10	97	84	11	73	209	1	208	1947.41	0.134498	0.124868	0.128339	3.49115	3.2472	3.09508	0.0160145	0.0236825	0.0275062	0.000816397	0.0247622
NM_001282994	Cobl	3993	386	657	472	39	2	37	25	4	21	58	3	55	503.964	0.314271	0.282103	0.36707	3.17085	2.51149	2.49563	0.00986929	0.0375172	0.0283275	0.000820124	0.0247932
NM_008729	Ctnnd2	3741	1564	2522	2278	117	6	111	74	13	61	254	7	247	2092.9	0.128919	0.119903	0.121809	3.62802	2.93788	3.2726	0.0135782	0.03427	0.0229305	0.000832025	0.0250274
NM_010864	Myo5a	5562	4950	6310	8508	254	16	238	181	22	159	583	14	569	6425.97	0.0691032	0.0659721	0.0573423	3.85308	3.46385	3.39391	0.0163577	0.0247378	0.0268835	0.000845658	0.0250687
NM_019864	Atr	7926	92	110	181	6	2	4	10	1	9	24	0	24	123.098	0.714733	0.637255	0.994922	1.33606	2.43166	2.68827	0.137895	0.0240416	0.00327841	0.000845012	0.0250687
NM_009125	Atxn2	3861	448	789	585	37	0	37	26	0	26	73	0	73	603.226	0.279991	0.251689	0.319293	3.03167	2.67204	2.72475	0.0155517	0.0320589	0.021917	0.000848835	0.0250817
NM_008168	Grik5	2940	965	1721	1423	62	3	59	60	7	53	188	3	185	1349.11	0.167675	0.154197	0.168639	3.0675	3.06806	3.28003	0.0243594	0.0259806	0.0173429	0.000852011	0.0250946
NM_001290995	Kif1b	5451	12875	18309	20873	420	23	397	352	50	302	1182	22	1160	16995.4	0.0431586	0.0420046	0.0331175	3.83588	3.65529	3.48448	0.0195591	0.0226481	0.0252373	0.00086527	0.0253223
NM_001163024	Mon2	5148	915	1138	1387	63	3	60	41	4	37	156	0	156	1129.86	0.187072	0.171201	0.193298	3.22865	2.69419	3.20613	0.017389	0.0387634	0.0168813	0.000878212	0.025457
NM_001165988	Ubap2l	2952	556	643	757	36	3	33	32	2	30	86	1	85	648.354	0.267107	0.240476	0.301577	2.81535	2.81722	2.87215	0.0240762	0.0267019	0.0178915	0.000886185	0.0256071
NM_001102430	Arfgef1	5541	2139	3115	4005	150	9	141	103	13	90	305	7	298	2988.4	0.104989	0.0984741	0.0946774	3.69467	3.22421	3.1997	0.0149237	0.0274178	0.028268	0.000890353	0.0256466
NM_009441	Ttc3	5940	14352	19269	23798	473	42	431	394	52	342	1037	24	1013	18716.8	0.0413245	0.0402854	0.031482	3.87946	3.76178	3.19635	0.0190005	0.0209441	0.0295614	0.00090308	0.0259317
NM_001145959	Ndrg2	1074	193	392	519	13	2	11	17	2	15	72	3	69	346.861	0.396213	0.354912	0.484517	1.7971	2.33239	3.17699	0.0817453	0.0425604	0.00341392	0.000910387	0.0260598
NM_001128180	Dlgap1	2049	2387	3085	3592	146	8	138	97	11	86	317	9	308	2978.08	0.105195	0.0986598	0.094905	3.66654	3.16195	3.25049	0.0154852	0.0292167	0.0268105	0.000926584	0.026196
NM_033565	Aff4	3483	1644	2811	2944	129	15	114	95	11	84	236	5	231	2396.01	0.119155	0.111185	0.110564	3.56145	3.29158	3.04625	0.0161282	0.0240237	0.0311533	0.000922794	0.026196
NM_001004062	Crtc1	1893	316	467	369	22	2	20	26	6	20	52	0	52	385.144	0.371712	0.33315	0.448967	2.52341	2.64615	2.6749	0.0294168	0.0268165	0.0155092	0.00093329	0.0262772
NM_028906	Dpp8	2679	1406	2006	2647	92	10	82	88	4	84	202	3	199	1954.73	0.134201	0.124604	0.127989	3.24858	3.44433	3.02797	0.0224516	0.0183584	0.0297549	0.000935194	0.0262772
NM_031174	Dscam	6042	643	1076	944	58	4	54	32	5	27	114	2	112	875.029	0.219821	0.199702	0.236629	3.27714	2.4454	2.9776	0.0132701	0.0483186	0.0197491	0.000960617	0.026909
NM_001024624	Cdkl5	2817	1382	1598	2339	105	6	99	55	2	53	183	5	178	1731.72	0.1442	0.13348	0.139867	3.61118	2.88072	2.98448	0.0123508	0.0349576	0.0298575	0.000975098	0.0271486
NM_001256082	Myo7a	6519	244	328	405	20	0	20	16	1	15	42	1	41	318.444	0.417155	0.373505	0.515165	2.67063	2.39653	2.52226	0.0199236	0.0373334	0.0179458	0.00100399	0.0278684
NM_001267622	Ttc28	7353	85	167	124	6	1	5	7	1	6	26	0	26	123.451	0.713637	0.636285	0.992665	1.59688	1.91494	2.79655	0.0979171	0.0647907	0.0021125	0.00100736	0.0278775
NM_133919	Aff1	3657	23	52	39	6	0	6	1	0	1	6	0	6	37.0333	1.56451	1.28169	3.77309	2.75139	1.01105	2.00744	0.00453461	0.25223	0.0119512	0.00102417	0.0282571
NM_007708	Cit	6168	889	1109	1035	65	3	62	46	6	40	100	2	98	1016.65	0.199858	0.182358	0.209969	3.35693	2.88303	2.64245	0.0129354	0.0296965	0.0357867	0.00102904	0.0283062
NM_019933	Ptpn4	2781	430	650	755	32	1	31	27	3	24	84	3	81	595.253	0.282421	0.253823	0.322649	2.79404	2.571	2.88565	0.0236742	0.0368149	0.015942	0.00103827	0.0284746
NM_008569	Anapc1	5835	986	1384	1602	51	2	49	69	4	65	146	2	144	1296.62	0.171804	0.157825	0.173823	2.83519	3.38735	2.95897	0.0324752	0.0161721	0.0268456	0.00105105	0.0285999
NM_027258	Rnf157	2046	980	1730	1437	82	4	78	45	5	40	158	1	157	1362.22	0.166687	0.153328	0.167404	3.4569	2.66347	3.03535	0.0135238	0.0418638	0.0249086	0.00105124	0.0285999
NM_001122730	Tnrc18	8568	633	1170	883	36	3	33	50	9	41	130	6	124	884.958	0.218241	0.198332	0.234492	2.57451	3.02189	3.11235	0.0394633	0.0229518	0.0157945	0.00106393	0.0286633
NM_011240	Ranbp2	9162	3148	3637	5520	156	11	145	134	16	118	378	3	375	3994.14	0.0892427	0.084246	0.0776699	3.51017	3.39355	3.25119	0.0209824	0.0244728	0.0286443	0.00108893	0.0291655
NM_001081152	Npat	4263	171	294	344	14	3	11	13	1	12	45	0	45	259.673	0.470699	0.421026	0.594546	2.02122	2.25006	2.8498	0.0573365	0.0439698	0.0058764	0.00109549	0.0292557
NM_030256	Bcl9l	4485	171	289	193	18	0	18	9	2	7	30	0	30	218.364	0.520324	0.465042	0.669303	2.81832	1.67963	2.44714	0.010742	0.0943963	0.0147658	0.00110524	0.0292788
NM_001033285	Cdc42bpa	5199	2311	3001	3970	129	10	119	103	10	93	316	12	304	3017.28	0.104418	0.09796	0.094048	3.44436	3.26378	3.21911	0.0207126	0.0263532	0.0277877	0.00111727	0.0294933
NM_001045513	Raph1	3801	249	434	429	24	1	23	11	2	9	59	1	58	361.117	0.38664	0.346409	0.470585	2.76592	1.62409	2.8916	0.0178431	0.102874	0.00843928	0.00113713	0.0297604
NM_011546	Zeb1	3354	109	150	209	8	1	7	12	2	10	26	2	24	150.758	0.640354	0.571408	0.855926	1.85721	2.41706	2.49325	0.0668448	0.026717	0.00876893	0.00114751	0.0299463
NM_001044308	Cacna1i	6600	857	1163	1058	47	4	43	47	3	44	130	2	128	1026.19	0.198687	0.181338	0.208429	2.83185	3.01033	3.01533	0.0297953	0.0250667	0.0211933	0.0011578	0.0300437
NM_001081098	Zfp362	1257	10	18	14	4	1	3	1	0	1	3	0	3	13.8378	4.25215	3.09525	16.9578	2.70614	1.74972	2.14722	0.00754004	0.130014	0.0163798	0.00117175	0.0303198
NM_009127	Scd1	1068	25	75	68	3	0	3	3	1	2	12	0	12	52.9456	1.18212	1.00492	2.34128	1.66731	1.32779	2.55662	0.0917735	0.161328	0.00109249	0.00117891	0.0304193
NM_025998	Nkain1	624	23	28	32	0	0	0	3	0	3	7	0	7	27.4524	2.046	1.6211	5.87173	0.17579	2.23568	2.48811	0.520804	0.0338666	0.000966531	0.00123176	0.0315165
NM_026604	Fam135a	4521	271	352	509	25	2	23	15	1	14	48	1	47	365.275	0.383952	0.344023	0.466684	2.75706	2.20046	2.5829	0.0183192	0.0522606	0.0179829	0.00124192	0.0316881
NM_001289826	Clock	2568	377	491	647	35	3	32	18	5	13	67	0	67	492.514	0.318884	0.286205	0.373566	2.98511	1.87666	2.79785	0.0144422	0.0811412	0.0155288	0.00130065	0.0327308
NM_011785	Akt3	1440	665	928	1162	59	1	58	34	5	29	90	3	87	894.179	0.216801	0.197084	0.232548	3.36166	2.52869	2.59602	0.0115111	0.0441813	0.035597	0.00129507	0.0327308
NM_001114140	Tcf20	5964	2292	3061	3713	127	8	119	89	10	79	301	4	297	2960.8	0.105543	0.0989729	0.0952891	3.45899	3.0453	3.2038	0.020209	0.032764	0.0280823	0.00132423	0.0329404
NM_009783	Cacna1g	6888	562	945	751	35	1	34	31	2	29	98	0	98	746.79	0.243483	0.220151	0.269148	2.74775	2.66385	2.93925	0.0289654	0.0353535	0.0182028	0.00132697	0.0329404
NM_029633	Clasp2	3861	3042	3867	5098	149	9	140	112	9	103	365	3	362	3911.25	0.0902852	0.0851914	0.0787671	3.47613	3.21491	3.2206	0.0216689	0.029091	0.029349	0.00131869	0.0329404
NM_134013	Psme4	5532	512	603	866	35	2	33	25	6	19	96	2	94	644.96	0.268028	0.241272	0.302839	2.81942	2.18889	3.02079	0.0238384	0.0603952	0.0132724	0.00135468	0.0335374
NM_001289682	Arhgap33	3918	382	776	481	28	1	27	23	2	21	74	2	72	542.97	0.299672	0.269121	0.346614	2.67257	2.45555	2.80637	0.0274766	0.0416963	0.0169413	0.0013724	0.0337934
NM_015771	Lats2	3129	208	382	407	14	1	13	15	0	15	50	0	50	320.719	0.415377	0.371927	0.512554	2.08016	2.39118	2.79552	0.0554627	0.0377587	0.00926289	0.00137175	0.0337934
NM_001303033	Ubr3	5682	2540	3517	3884	140	15	125	101	21	80	338	4	334	3260.75	0.0999402	0.093924	0.0891426	3.45468	2.99081	3.2798	0.0210063	0.0349531	0.02667	0.00138256	0.0338616
NM_007561	Bmpr2	3117	1552	3256	2331	122	11	111	65	9	56	244	2	242	2338.35	0.120848	0.1127	0.112498	3.54217	2.73336	3.13652	0.0163718	0.0424828	0.028084	0.00137968	0.0338616
NM_023045	Xpo7	3264	655	1025	1078	47	3	44	34	5	29	117	2	115	899.03	0.216054	0.196436	0.231541	2.96668	2.52463	2.98937	0.0229338	0.0444483	0.0198278	0.00141946	0.0346726
NM_018878	Paxip1	3171	238	294	357	17	4	13	15	1	14	43	0	43	292.248	0.43906	0.39295	0.547469	2.15213	2.36783	2.67197	0.0484786	0.0378582	0.0113866	0.00145942	0.035554
NM_001007573	Maneal	1359	95	145	154	12	2	10	6	2	4	22	1	21	128.594	0.698154	0.622582	0.961471	2.43975	1.39888	2.46182	0.0202364	0.132146	0.00796815	0.00148319	0.035892
NM_001290427	Frmpd4	3939	1130	1813	1892	76	5	71	65	3	62	137	4	133	1573.88	0.152703	0.141003	0.150148	3.21123	3.17482	2.6587	0.0214516	0.024003	0.0414454	0.00148505	0.035892
NM_001252060	Cacna1a	6984	1242	1972	1860	70	6	64	64	4	60	178	2	176	1665.49	0.147601	0.136491	0.14396	3.01988	3.08583	3.00578	0.0282131	0.0273697	0.0286374	0.00152961	0.0367748
NM_001166648	Zfp280c	2229	30	56	64	9	1	8	3	1	2	5	0	5	47.9419	1.27227	1.07084	2.65452	2.91409	1.40228	1.53665	0.00256743	0.149239	0.0587139	0.0015516	0.0372059
NM_001081298	Adgrl2	4464	916	1180	1257	60	3	57	45	3	42	101	1	100	1109.66	0.189187	0.173049	0.196034	3.16985	2.88606	2.58708	0.0188889	0.0305531	0.0398696	0.00158089	0.0377342
NM_001162943	Dchs1	9876	146	255	263	9	1	8	15	6	9	41	2	39	214.921	0.525076	0.469255	0.676517	1.75262	2.01348	2.83016	0.0814338	0.0602897	0.00469007	0.00158187	0.0377342
NM_020508	Brd4	4203	324	693	407	31	1	30	17	1	16	54	1	53	471.506	0.327783	0.294115	0.386139	2.92866	2.18948	2.50721	0.0156426	0.0565222	0.0263329	0.00159645	0.037983
NM_001097623	Trerf1	3678	125	226	166	13	0	13	8	1	7	23	1	22	170.928	0.597448	0.533402	0.787504	2.56736	1.86341	2.25214	0.0170603	0.0725075	0.0195212	0.00164551	0.039049
NM_001286713	Tsc2	5427	1070	1503	1549	59	3	56	51	3	48	149	4	145	1357.62	0.167032	0.153632	0.167835	2.98863	2.92317	2.92465	0.0271614	0.0312092	0.0287747	0.00165931	0.0392746
NM_001080814	Fat3	13656	3528	5102	5510	187	8	179	113	7	106	301	9	292	4629.38	0.0822852	0.077942	0.0704811	3.69793	3.12945	2.74935	0.017695	0.0321059	0.0431917	0.00166753	0.0392866
NM_001290715	Adgrb2	4686	4681	6093	6834	167	11	156	156	15	141	436	5	431	5798.83	0.0729164	0.0694472	0.0610873	3.32633	3.36872	3.09278	0.0273056	0.0266252	0.0337725	0.00166839	0.0392866
NM_001081251	Pbrm1	5115	594	842	1086	41	2	39	36	1	35	81	1	80	815.565	0.229982	0.208497	0.250485	2.87219	2.86078	2.56498	0.0251288	0.0279384	0.0352743	0.0016803	0.0394447
NM_008963	Ptgds	570	69	309	130	5	0	5	18	4	14	24	2	22	163.864	0.611608	0.545947	0.809451	1.37764	2.80197	2.29276	0.129375	0.0112993	0.0169823	0.00168372	0.0394447
NM_001017985	C2cd3	6972	323	590	522	24	4	20	18	5	13	79	1	78	468.083	0.32929	0.295454	0.388273	2.37242	1.91484	3.06312	0.0409421	0.0775146	0.00785857	0.00169016	0.0394945
NM_011204	Ptpn13	7356	58	117	153	9	0	9	5	1	4	16	1	15	103.198	0.784873	0.6993	1.15368	2.47257	1.56397	2.21406	0.0171113	0.10873	0.0135107	0.00170121	0.0396516
NM_001081423	Ttll5	3987	117	189	252	11	0	11	8	0	8	26	1	25	178.122	0.583871	0.521371	0.766528	2.31305	2.0024	2.38936	0.0305609	0.0592376	0.0141136	0.00172437	0.0400894
NM_007379	Abca2	7302	1651	2203	2214	86	3	83	64	8	56	204	3	201	2011.05	0.131974	0.122623	0.125376	3.24387	2.84651	3.01499	0.022849	0.0373307	0.0304963	0.00175015	0.0404833
NM_001008231	Daam2	3348	67	149	156	6	1	5	6	1	5	24	1	23	118.225	0.730343	0.651067	1.02779	1.63037	1.725	2.66824	0.0932878	0.0865388	0.00330227	0.00178611	0.0410627
NM_001008791	Whrn	2757	68	107	67	4	0	4	7	0	7	12	0	12	81.7163	0.891107	0.788705	1.4387	1.65326	2.41718	2.13906	0.0909012	0.0221523	0.0132618	0.00178865	0.0410627
NM_001009947	Dock11	6222	117	166	267	10	0	10	6	4	2	36	0	36	174.648	0.590328	0.527093	0.776495	2.20277	0.43222	2.91733	0.0377001	0.292952	0.00243638	0.0017999	0.0412178
NM_001163574	Tjp1	5058	677	864	1173	39	8	31	32	5	27	137	3	134	881.652	0.218764	0.198786	0.235198	2.48994	2.43974	3.22698	0.0437677	0.0487037	0.0127111	0.00181028	0.0412491
NM_010050	Dio2	801	4	13	20	1	0	1	2	0	2	3	0	3	11.1914	5.47758	3.9026	23.8664	1.87046	2.49396	2.35143	0.111023	0.0248235	0.00981751	0.00180813	0.0412491
NM_025757	Gid4	654	39	69	65	4	0	4	4	0	4	9	0	9	56.3143	1.13123	0.967526	2.17136	1.94148	2.01847	2.11876	0.0540609	0.0524219	0.00961096	0.00181811	0.0413247
NM_001112721	Ubr5	8379	1899	2564	3291	89	6	83	81	10	71	267	6	261	2518.54	0.115773	0.108158	0.106725	3.06966	3.01469	3.1737	0.0301271	0.0328406	0.0276387	0.00182408	0.0413578
NM_001134383	Iqsec1	2886	1691	2720	2369	99	7	92	65	5	60	210	3	207	2235.95	0.124035	0.115546	0.116155	3.30864	2.86481	2.95523	0.0219334	0.0373229	0.033572	0.00183165	0.0413828
NM_027727	Dym	2010	202	401	392	20	1	19	17	2	15	34	0	34	320.293	0.415709	0.372222	0.513041	2.59576	2.39218	2.25366	0.0232335	0.0376791	0.031447	0.00183422	0.0413828
NM_001008422	Scaf1	3771	612	1254	960	43	4	39	38	2	36	102	2	100	923.154	0.212441	0.1933	0.226685	2.77626	2.80732	2.76412	0.0307176	0.0316347	0.0286925	0.00185363	0.0416668
NM_001164493	Klhl29	2628	153	233	212	13	0	13	11	3	8	26	0	26	197.464	0.550986	0.492226	0.716015	2.45564	1.92505	2.34462	0.0237467	0.0676014	0.0174458	0.00186045	0.0416668
NM_008739	Nsd1	8076	3306	4560	5154	144	12	132	120	15	105	336	6	330	4264.37	0.0860764	0.0813726	0.0743694	3.32494	3.17753	3.0043	0.0259807	0.0304865	0.0356522	0.00187323	0.0418508
NM_001040611	Peg10	1131	17	33	25	1	0	1	2	0	2	6	0	6	24.6137	2.27373	1.77876	6.92264	1.26029	1.90255	2.40048	0.209028	0.076015	0.00184318	0.00193053	0.0428176
NM_001177667	Sptan1	7434	10462	10742	15090	240	18	222	238	43	195	656	10	646	11984.5	0.0507377	0.0490709	0.0399646	3.2706	3.28895	2.97705	0.0298571	0.0294882	0.0350777	0.00201708	0.0445215
NM_008678	Ncoa2	4389	880	1284	1275	50	1	49	42	3	39	116	2	114	1132.27	0.186824	0.170983	0.192978	2.94012	2.76658	2.75495	0.0268173	0.0356357	0.0326644	0.00203498	0.0447013
NM_080448	Srgap3	3300	1483	2689	2212	91	3	88	62	6	56	186	3	183	2094.16	0.128873	0.119862	0.121757	3.29593	2.81612	2.84138	0.0217178	0.0387326	0.0370432	0.00203198	0.0447013
NM_007619	Cbl	2742	253	441	439	20	2	18	16	1	15	49	3	46	367.744	0.382378	0.342624	0.4644	2.41481	2.28852	2.54605	0.0346186	0.0462729	0.0195938	0.0020442	0.0447964
NM_001001983	Pi4ka	6135	4874	6144	7268	172	6	166	117	12	105	477	7	470	6013.37	0.071537	0.0681913	0.0597272	3.38729	2.91964	3.18252	0.0259489	0.0384349	0.0316098	0.00205164	0.0448521
NM_001081360	Camsap2	4437	2755	3635	4709	140	10	130	91	10	81	280	5	275	3609.26	0.0944113	0.0889285	0.0831615	3.43221	2.93232	2.90261	0.0222463	0.0372022	0.0382083	0.00205679	0.0448576
NM_001081016	Zc3h7b	2949	456	773	728	28	2	26	29	5	24	81	1	80	639.14	0.269625	0.242653	0.305028	2.49386	2.51762	2.79951	0.0389112	0.0405961	0.020185	0.00207092	0.045003
NM_010239	Fth1	549	715	1260	1136	57	9	48	37	6	31	111	5	106	1016.18	0.199916	0.182408	0.210046	2.99471	2.52583	2.755	0.023509	0.045667	0.0308158	0.00213491	0.0461222
NM_001185164	Vegfb	567	6	12	11	1	0	1	0	1	0	4	0	4	9.3732	6.78876	4.78204	31.9024	2.00771	1.04203	2.84394	0.0944451	0.370315	0.000953336	0.00214869	0.0463106
NM_001164225	Fbxl16	1440	2307	4018	3375	104	7	97	93	8	85	270	2	268	3187.13	0.101235	0.0950915	0.090555	3.10979	3.09436	2.98522	0.0304439	0.0316187	0.0351028	0.00217243	0.0466029
NM_001170745	Magi2	3297	558	680	713	36	6	30	22	3	19	85	1	84	649.59	0.266774	0.240188	0.30112	2.68061	2.18352	2.85344	0.029855	0.0608292	0.0185646	0.00216843	0.0466029
NM_001081030	Sbf1	5604	3244	4541	5191	123	9	114	108	23	85	413	8	405	4240.99	0.0863373	0.0816092	0.0746395	3.11941	2.88	3.30424	0.0316357	0.0392669	0.0275728	0.00219689	0.0467988
NM_001289685	Iqsec3	2688	473	647	566	31	5	26	22	4	18	74	2	72	563.312	0.292672	0.262896	0.336862	2.59163	2.21645	2.77099	0.0318724	0.0569689	0.0188534	0.00219588	0.0467988
NM_027901	Gtf3c2	2724	188	336	317	11	1	10	14	1	13	40	0	40	273.519	0.456576	0.408495	0.573473	1.85548	2.31799	2.63381	0.0732922	0.0400947	0.0116203	0.00219138	0.0467988
NM_009469	Ulk1	3156	303	507	431	13	1	12	16	2	14	71	1	70	408.687	0.358371	0.321298	0.429758	1.7856	2.1162	3.03964	0.0845659	0.0599769	0.00680684	0.00221127	0.046996
NM_009231	Sos1	3960	386	606	705	34	3	31	22	4	18	59	3	56	548.769	0.297636	0.267311	0.343774	2.85699	2.23608	2.43922	0.0200979	0.055328	0.0331084	0.00233144	0.048758
NM_133975	Trip12	6078	2785	3872	4741	120	15	105	101	16	85	319	4	315	3707.17	0.0930133	0.0876632	0.0816635	3.10598	2.98095	3.07212	0.031401	0.0357574	0.0332226	0.00235681	0.0490644
NM_025729	Tab3	2151	60	94	100	10	0	10	2	0	2	10	0	10	82.7175	0.884866	0.783827	1.42122	2.78133	0.993001	1.88634	0.00611253	0.215623	0.0287863	0.00238988	0.0496402
NM_001163610	Nhsl2	3660	304	402	427	21	0	21	17	2	15	38	0	38	374.205	0.378331	0.33903	0.458537	2.61283	2.27545	2.2601	0.0246491	0.0473973	0.0345849	0.00251681	0.0518068
NM_011857	Tenm3	8148	4140	5387	6229	182	7	175	100	20	80	329	1	328	5176.65	0.0774543	0.0735692	0.0656035	3.57901	2.64399	2.80904	0.0208536	0.0467872	0.041344	0.00251339	0.0518068
NM_011264	Rev3l	9369	683	1243	1404	52	6	46	38	6	32	108	1	107	1067.23	0.193856	0.177125	0.202103	2.89665	2.53344	2.72127	0.0277306	0.0457633	0.0331104	0.00259903	0.0531487
NM_026484	Ccny	1026	406	575	620	31	2	29	17	2	15	58	0	58	525.129	0.306146	0.274879	0.355666	2.79797	2.02119	2.53134	0.0217062	0.0701475	0.0274815	0.00259018	0.0531487
NM_030695	Lrba	8565	470	611	764	29	3	26	22	3	19	75	1	74	602.448	0.280226	0.251895	0.319617	2.53963	2.24005	2.74536	0.0355597	0.0562415	0.0210882	0.00260697	0.0531487
NM_080855	Zcchc14	2871	223	456	414	19	0	19	14	1	13	41	1	40	352.954	0.392051	0.351215	0.478453	2.52059	2.12667	2.3885	0.0282498	0.0572497	0.0260745	0.00260672	0.0531487
NM_011845	Mid2	2058	98	143	214	6	2	4	8	0	8	25	0	25	145.028	0.654075	0.583559	0.879483	1.20914	2.15663	2.58712	0.157427	0.0439048	0.00614301	0.00262139	0.0532415
NM_001008550	Zfyve26	7590	179	217	220	7	0	7	10	2	8	35	0	35	205.722	0.538333	0.481009	0.696692	1.61657	1.89431	2.72025	0.0970008	0.0710189	0.00629351	0.0026667	0.0538038
NM_001114399	Zmym4	4650	564	857	953	37	4	33	32	2	30	74	2	72	772.382	0.238213	0.215606	0.261846	2.67984	2.68587	2.4673	0.0324886	0.0347622	0.0391327	0.00270901	0.0545375
NM_013720	Mga	9129	1101	1551	1965	57	6	51	58	9	49	144	6	138	1495.95	0.157458	0.1452	0.155968	2.78106	2.8795	2.76041	0.036204	0.033772	0.0365342	0.00273282	0.0548961
NM_001083906	Nr3c2	2943	1696	2445	2532	87	7	80	61	6	55	180	4	176	2192.28	0.125469	0.116826	0.117809	3.1246	2.75623	2.74137	0.0272554	0.0412815	0.0411978	0.00281697	0.0561642
NM_001113517	Arhgef7	2349	428	704	623	28	0	28	25	0	25	50	2	48	577.097	0.288142	0.258873	0.330571	2.676	2.65082	2.17261	0.0282515	0.0324267	0.050463	0.00281079	0.0561642
NM_016698	Rnf10	2415	787	1533	1349	41	2	39	56	4	52	96	2	94	1191.56	0.180995	0.165883	0.185489	2.57867	3.13428	2.43021	0.0428708	0.0225369	0.0487683	0.00285501	0.0566058
NM_028291	Pan3	2514	187	302	300	16	1	15	11	1	10	29	0	29	257.649	0.472856	0.42294	0.597772	2.44232	2.01492	2.24066	0.0278381	0.0623064	0.0275515	0.00288817	0.0571397
NM_001040106	Aak1	2880	1700	2492	2748	86	6	80	66	10	56	177	4	173	2265.97	0.123076	0.11469	0.115052	3.09901	2.75696	2.6849	0.0283509	0.0414255	0.0436194	0.00305726	0.0595803
NM_001040400	Tet2	5739	137	183	259	9	1	8	11	1	10	25	1	24	186.731	0.568627	0.507862	0.74306	1.86147	2.25649	2.28736	0.0683868	0.0392485	0.0191968	0.00307174	0.0595803
NM_001081055	Trappc10	3777	1050	1599	1690	44	2	42	47	1	46	145	3	142	1416.95	0.162731	0.149847	0.162479	2.54889	2.83095	2.85355	0.0460104	0.035179	0.0320798	0.00309115	0.0595803
NM_001271798	Pcdh9	3612	1559	1966	2493	80	8	72	54	9	45	178	5	173	1967.92	0.13367	0.124132	0.127364	3.05816	2.55345	2.82058	0.0284839	0.0490436	0.0372423	0.0030961	0.0595803
NM_009029	Rb1	2766	179	321	329	16	2	14	14	1	13	27	0	27	267.92	0.462159	0.413449	0.581792	2.31895	2.33352	2.10352	0.0356141	0.0388015	0.0371446	0.00306217	0.0595803
NM_009155	Sepp1	1143	28	114	105	5	1	4	5	3	2	16	1	15	76.5566	0.926063	0.815269	1.53809	1.70375	1.05108	2.50138	0.0839145	0.206337	0.00295503	0.00305417	0.0595803
NM_025730	Lrrk2	7584	748	1017	1277	36	2	34	35	3	32	109	1	108	989.237	0.203333	0.185383	0.214555	2.53009	2.59038	2.80757	0.0431362	0.0422078	0.0281749	0.00306062	0.0595803
NM_030168	Rictor	5127	615	852	1144	34	1	33	27	7	20	110	2	108	843.176	0.225108	0.204281	0.243815	2.61195	2.05819	2.96128	0.036956	0.0713746	0.0196423	0.00308563	0.0595803
NM_054081	Mta1	2097	181	371	283	19	2	17	10	1	9	31	1	30	272.823	0.457261	0.409103	0.574493	2.56794	1.83448	2.23291	0.0223511	0.0796512	0.0291968	0.00309381	0.0595803
NM_133360	Acaca	7038	1190	1729	2003	58	4	54	59	6	53	130	2	128	1602.08	0.15108	0.139568	0.148173	2.80892	2.9391	2.58675	0.035739	0.0321421	0.0448074	0.0030691	0.0595803
NM_001004164	Gnptab	3708	454	866	738	35	6	29	24	4	20	76	1	75	670.894	0.261173	0.235368	0.293464	2.60832	2.22969	2.66093	0.0337714	0.0581588	0.0267283	0.003119	0.0598953
NM_029498	Zmym2	4131	1237	1998	2261	78	9	69	49	6	43	150	4	146	1777.12	0.141993	0.131523	0.137225	3.07657	2.56584	2.67543	0.0269195	0.0480136	0.0420263	0.00320716	0.0613311
NM_001077354	C77370	4548	901	1248	1601	55	3	52	41	8	33	106	0	106	1215.5	0.17878	0.163944	0.182662	2.96927	2.47889	2.58268	0.0265945	0.0496089	0.0414941	0.00322765	0.061503
NM_001081255	Lrch3	2337	49	110	91	6	1	5	5	0	5	12	1	11	80.7248	0.897452	0.79362	1.45655	1.92574	2.0113	2.03533	0.0563145	0.0532337	0.0182747	0.00322958	0.061503
NM_001081028	Sipa1l3	5331	956	1583	1199	38	8	30	46	1	45	141	4	137	1241.8	0.176433	0.161886	0.179676	2.17897	2.89893	2.92914	0.0647002	0.0312415	0.027273	0.0032461	0.0616894
NM_011246	Rasgrp1	2388	6345	9285	9705	182	13	169	127	8	119	414	1	413	8307.24	0.0606371	0.0582167	0.0491944	3.16281	2.85613	2.68552	0.0321525	0.0399208	0.0430603	0.00325295	0.0616916
NM_009628	Adnp	3327	1254	1864	2103	77	1	76	42	9	33	148	6	142	1699.77	0.145813	0.134909	0.141805	3.24853	2.22727	2.67845	0.0211232	0.0639617	0.0414473	0.00328789	0.0622254
NM_023328	Agtpbp1	3657	3244	4455	5919	122	4	118	90	5	85	279	6	273	4404.64	0.084559	0.0799979	0.0728048	3.13942	2.85159	2.70051	0.0312199	0.0402176	0.0447267	0.00329557	0.062242
NM_001081963	9430020K01Rik	3963	777	1231	1179	48	0	48	27	3	24	103	0	103	1045.11	0.196418	0.17936	0.205453	2.97298	2.14862	2.68696	0.0246309	0.0668032	0.0342549	0.0033054	0.0622653
NM_015753	Zeb2	3648	2563	3416	4303	121	6	115	65	13	52	262	9	253	3348.34	0.0984618	0.0925895	0.087535	3.31486	2.35899	2.85497	0.0248222	0.0576915	0.0394718	0.0033131	0.0622653
NM_023662	Pcm1	6078	1523	1905	2369	68	1	67	49	12	37	197	6	191	1899.98	0.136471	0.126622	0.130666	2.983	2.30418	2.99641	0.0307558	0.060317	0.0305161	0.00331719	0.0622653
NM_022565	Ndst4	2619	522	616	1006	31	1	30	30	2	28	56	0	56	690.309	0.256322	0.231201	0.286826	2.63354	2.67395	2.21845	0.0329886	0.0338378	0.0513765	0.00335249	0.0625434
NM_029094	Pik3cb	3195	290	514	416	23	0	23	15	3	12	41	0	41	401.344	0.362407	0.324884	0.435557	2.68416	1.92335	2.29966	0.0225057	0.0753085	0.0338198	0.00335108	0.0625434
NM_018733	Scn1a	5997	1661	2055	2835	83	7	76	64	12	52	158	3	155	2130.92	0.127567	0.118698	0.120239	3.07352	2.69809	2.58648	0.0286691	0.0434121	0.0471946	0.00341854	0.0635168
NM_009826	Rb1cc1	4767	1694	2178	3031	66	5	61	74	12	62	187	3	184	2236.48	0.124017	0.115531	0.116135	2.7235	2.91117	2.78594	0.0418181	0.0356553	0.0396576	0.00343718	0.063734
NM_001163026	Dnajc13	6732	1024	1368	1823	53	7	46	48	6	42	122	2	120	1366.09	0.166398	0.153074	0.167043	2.70551	2.73005	2.6477	0.0384905	0.0390013	0.0401618	0.003492	0.0646197
NM_001081286	Fat1	13773	758	981	1207	35	5	30	39	6	33	105	4	101	963.575	0.206741	0.188347	0.219075	2.37535	2.65318	2.7371	0.0511303	0.0389389	0.0306198	0.00352371	0.0650749
NM_001162864	Ttbk1	3927	662	939	895	33	1	32	34	3	31	72	1	71	826.23	0.228066	0.20684	0.247857	2.5846	2.6811	2.38256	0.0380182	0.0358312	0.0451739	0.00355076	0.0653112
NM_018873	Srcin1	3654	1174	1783	1536	47	5	42	53	7	46	144	1	143	1489.77	0.157854	0.145549	0.156455	2.5101	2.79335	2.81538	0.048297	0.0371296	0.0342602	0.00354603	0.0653112
NM_015802	Dlc1	3279	260	464	462	25	1	24	11	6	5	52	2	50	384.255	0.372239	0.333619	0.449728	2.77674	0.840525	2.62163	0.0182428	0.19495	0.0174	0.00356695	0.0654775
NM_001039472	Kif21b	4875	424	586	673	27	0	27	21	1	20	49	2	47	550.443	0.297055	0.266794	0.342963	2.66199	2.37818	2.18836	0.0281671	0.0463953	0.0483102	0.00362554	0.0657876
NM_001164268	Kalrn	4965	8721	10392	13094	162	10	152	171	16	155	448	7	441	10589.2	0.0538303	0.0519378	0.0428132	2.82291	3.05252	2.54642	0.0403987	0.0347638	0.0448037	0.00361573	0.0657876
NM_007907	Eef2	2577	8644	11223	13700	175	11	164	168	21	147	464	10	454	10983	0.0528932	0.0510701	0.0419467	2.90358	2.94917	2.55311	0.038328	0.0371202	0.0443948	0.00362694	0.0657876
NM_001112723	Arhgef10l	3711	301	367	459	13	1	12	20	1	19	40	0	40	370.024	0.380938	0.341345	0.462313	1.86254	2.60581	2.34306	0.0762518	0.0281629	0.0295099	0.00363671	0.0658346
NM_011324	Scnn1a	2103	37	35	51	5	0	5	1	0	1	6	0	6	40.7976	1.44396	1.1952	3.29293	2.45405	0.938407	1.9143	0.0137846	0.264569	0.0175416	0.00366481	0.0662123
NM_013507	Eif4g2	2721	2480	5009	4529	103	10	93	86	19	67	319	9	310	3885.42	0.0906175	0.0854927	0.079118	2.8963	2.60691	3.00392	0.0381766	0.0482704	0.0353905	0.0037227	0.0667317
NM_026799	Drosha	4122	823	1518	1399	45	7	38	57	11	46	99	4	95	1215.53	0.178777	0.163941	0.182658	2.52673	2.946	2.42615	0.0456213	0.0292419	0.0492508	0.00374523	0.0670045
NM_001081379	Ankrd11	7932	1626	2908	2675	74	9	65	69	4	65	170	3	167	2348.74	0.120538	0.112422	0.112143	2.77578	2.94154	2.59975	0.0400738	0.0348921	0.0471962	0.00375864	0.0671133
NM_008748	Dusp8	1992	316	471	435	22	2	20	12	2	10	49	0	49	403.785	0.361053	0.323681	0.433611	2.48682	1.67779	2.54536	0.0320635	0.0979167	0.0214162	0.00381619	0.0674833
NM_011323	Scn8a	5937	4788	6006	6570	142	6	136	101	14	87	319	7	312	5747.94	0.0732563	0.0697565	0.0614234	3.13657	2.68502	2.63639	0.0321991	0.0453495	0.0459884	0.00381231	0.0674833
NM_011789	Apc2	6825	1432	1745	1921	54	4	50	44	5	39	176	3	173	1691	0.146264	0.135308	0.142348	2.65817	2.46561	2.9665	0.0425379	0.0523075	0.0302016	0.00381449	0.0674833
NM_001081376	Chd5	5859	2943	3737	4158	126	10	116	75	18	57	225	2	223	3579.12	0.0948543	0.0893293	0.0836376	3.27564	2.43904	2.60951	0.0263156	0.05447	0.0478165	0.00387624	0.0681803
NM_001129787	Igsf9b	3987	322	352	430	19	0	19	17	4	13	38	2	36	366.701	0.383041	0.343213	0.465362	2.49101	2.098	2.20364	0.03036	0.0599599	0.0376723	0.00387794	0.0681803
NM_001162906	2410089E03Rik	9645	308	553	541	18	0	18	18	2	16	51	0	51	454.617	0.335381	0.300868	0.396917	2.25063	2.21685	2.48786	0.0482685	0.0541295	0.0264884	0.00390685	0.068557
NM_134089	Scrib	4998	148	234	257	6	0	6	12	2	10	32	2	30	207.441	0.53579	0.478755	0.692817	1.41748	2.17757	2.49651	0.123103	0.0463113	0.0122854	0.00394498	0.0690936
NM_001012765	Adcy5	3789	669	854	999	34	5	29	34	3	31	73	0	73	829.202	0.227539	0.206385	0.247137	2.44431	2.67841	2.41863	0.0454248	0.0360001	0.0432325	0.00397508	0.0694881
NM_001004144	Git1	2313	1656	3038	2510	64	4	60	69	6	63	182	3	179	2360.35	0.120194	0.112115	0.11175	2.6583	2.89344	2.69455	0.044751	0.0366112	0.0435006	0.00400121	0.0698116
NM_008839	Pik3ca	3207	647	956	1144	30	1	29	37	1	36	75	2	73	890.645	0.21735	0.19756	0.233288	2.38898	2.83422	2.34985	0.0494344	0.0300948	0.0484754	0.00403977	0.0703504
NM_001165956	Phc3	2856	131	208	175	11	1	10	5	0	5	24	1	23	170.1	0.599065	0.534834	0.790005	2.22319	1.45202	2.31822	0.0359415	0.122784	0.0163868	0.00404877	0.0703734
NM_001003672	Pcdhac2	3021	499	687	820	28	2	26	25	3	22	64	1	63	654.302	0.265511	0.239098	0.299392	2.47571	2.37973	2.4371	0.0402631	0.0486258	0.0371552	0.0040682	0.0704173
NM_001036684	Atp2b2	3597	7842	8895	10566	166	7	159	135	11	124	354	7	347	9059.27	0.0580853	0.0558676	0.0467842	3.00826	2.85	2.3516	0.0359923	0.0399214	0.0506035	0.0040667	0.0704173
NM_001145897	Gse1	3633	315	625	495	24	0	24	19	3	16	42	1	41	468.792	0.328976	0.295176	0.387829	2.62279	2.19381	2.1502	0.027533	0.0561427	0.0471472	0.00407436	0.0704173
NM_001080706	Btaf1	5547	364	418	646	27	0	27	15	0	15	36	0	36	463.05	0.331535	0.29745	0.391457	2.79583	2.1156	1.97919	0.020025	0.0616083	0.0597111	0.00411004	0.0706944
NM_001099276	Pik3c2b	4899	145	224	210	11	1	10	7	0	7	25	1	24	190.554	0.562178	0.502147	0.73316	2.13529	1.78185	2.26786	0.0438235	0.082083	0.0204794	0.0041101	0.0706944
NM_001168292	R3hdm2	3135	969	1577	1332	60	7	53	40	3	37	87	1	86	1280.49	0.173131	0.158989	0.175496	2.95591	2.60028	2.23405	0.0276865	0.0441997	0.0602612	0.00411355	0.0706944
NM_001081392	Mdn1	16749	517	735	958	28	3	25	27	4	23	78	3	75	713.895	0.250743	0.226403	0.279164	2.35378	2.37572	2.60116	0.0485577	0.0499326	0.0307439	0.00414965	0.0711813
NM_007804	Cux2	4281	459	485	408	23	0	23	18	0	18	37	0	37	463.433	0.331363	0.297297	0.391212	2.5728	2.3629	2.01687	0.029766	0.0448656	0.0567384	0.00420513	0.0718638
NM_001004177	Celsr2	8754	4974	7647	6972	111	9	102	117	14	103	394	5	389	6463.83	0.0688929	0.0657802	0.0571372	2.63416	2.83795	2.84077	0.046803	0.0407208	0.0401077	0.00423512	0.0722416
NM_001290814	Aff3	3690	550	743	817	38	1	37	22	6	16	62	2	60	693.769	0.255483	0.23048	0.285676	2.9234	1.89968	2.31148	0.0209763	0.0815621	0.0456613	0.00431047	0.0732539
NM_011250	Rbl2	3408	272	437	464	18	1	17	15	2	13	43	2	41	381.295	0.374009	0.335191	0.452285	2.30879	2.06872	2.34896	0.0416586	0.0627492	0.0298474	0.00430607	0.0732539
NM_001285860	Sgip1	1920	413	782	680	28	2	26	17	5	12	75	0	75	610.711	0.277754	0.24973	0.316207	2.52908	1.60834	2.75136	0.036324	0.105127	0.0211215	0.00442342	0.0750342
NM_001082414	Sh3d19	2370	55	68	103	6	1	5	3	2	1	14	1	13	72.9445	0.953711	0.835923	1.61848	2.0042	0.502384	2.35523	0.047844	0.332917	0.00511461	0.0044594	0.0750884
NM_029709	Clasp1	4383	758	1157	1210	39	3	36	30	2	28	99	3	96	1021.13	0.199306	0.181877	0.209243	2.5857	2.38016	2.60877	0.0407487	0.0533329	0.0374348	0.00445449	0.0750884
NM_009027	Rasgrf2	3261	388	469	634	30	2	28	13	5	8	53	0	53	486.788	0.321252	0.28831	0.376907	2.80775	1.24801	2.47653	0.0202644	0.141748	0.0285223	0.0044799	0.0751572
NM_001006664	Epb41l1	2640	1878	3026	3041	74	5	69	62	11	51	209	5	204	2592.69	0.113857	0.10644	0.104562	2.78417	2.52344	2.79185	0.0403332	0.0511313	0.0404401	0.00454488	0.0757275
NM_008714	Notch1	7596	63	138	89	5	0	5	3	7	0	20	0	20	95.3223	0.818244	0.728755	1.23969	1.79706	-0.698389	2.68276	0.0715021	0.574163	0.00202974	0.00454176	0.0757275
NM_029749	Usp42	3975	106	159	178	11	0	11	6	1	5	17	2	15	144.206	0.656108	0.585359	0.88305	2.47658	1.57594	1.89215	0.0194611	0.106098	0.0404139	0.00454696	0.0757275
NM_001205241	Kat6b	5292	308	450	465	20	0	20	13	0	13	38	0	38	401.417	0.362366	0.324847	0.435498	2.49137	2.03013	2.19256	0.0317285	0.0664471	0.0405443	0.00463633	0.076914
NM_001277986	Snap91	2691	2050	2866	3292	83	4	79	61	9	52	185	5	180	2681.92	0.111668	0.104477	0.102103	2.95062	2.52553	2.57966	0.0345459	0.0511016	0.0485111	0.00464339	0.076914
NM_052993	C1galt1	1092	21	48	39	1	1	0	2	0	2	8	0	8	34.8728	1.64703	1.34051	4.11649	-0.00943137	1.64111	2.42784	0.544124	0.11189	0.00140384	0.00463589	0.076914
NM_001290702	Tenm2	8202	3989	5438	5913	139	5	134	82	4	78	211	7	204	5044.31	0.0785406	0.0745538	0.066694	3.21644	2.62736	2.15149	0.0296293	0.0473587	0.0616862	0.00468366	0.0774411
NM_001168304	Cdk19	1506	105	161	225	13	0	13	6	2	4	16	0	16	156.771	0.626736	0.559347	0.833432	2.63429	1.25021	1.89923	0.0137204	0.153303	0.0415302	0.00471844	0.0777516
NM_001252436	Dlg1	2505	703	811	1143	31	3	28	34	5	29	81	2	79	867.986	0.220961	0.20069	0.238174	2.36002	2.551	2.48712	0.0507772	0.0427143	0.0404653	0.0047364	0.0777516
NM_001276467	Asap1	3273	1140	1784	1517	59	4	55	29	3	26	136	1	135	1470.3	0.159117	0.146663	0.15801	2.90137	2.00352	2.74557	0.0312519	0.0760534	0.0369227	0.00473608	0.0777516
NM_019945	Mast1	4713	840	1326	1168	41	1	40	33	3	30	92	0	92	1100.28	0.190193	0.173927	0.197337	2.676	2.42036	2.47619	0.0373889	0.0518063	0.0452171	0.0047285	0.0777516
NM_001033258	Arfgef3	6513	2930	3309	4179	81	7	74	70	7	63	262	7	255	3440.94	0.0969664	0.0912388	0.0859151	2.66458	2.6106	2.84004	0.0458772	0.0481097	0.0400456	0.00476345	0.0780558
NM_001081412	Bcr	3813	1422	2553	2107	70	2	68	45	5	40	149	6	143	1996.15	0.132553	0.123138	0.126054	2.96583	2.37675	2.53386	0.0317985	0.0569892	0.0490101	0.00478211	0.0781432
NM_001145836	Ralgds	2688	420	727	648	27	0	27	21	0	21	44	0	44	587.606	0.284798	0.255917	0.325937	2.61141	2.39627	2.03239	0.031563	0.0462312	0.0609244	0.00478584	0.0781432
NM_001252453	Ptprs	4506	7982	12550	12379	164	18	146	125	13	112	441	9	432	10775.6	0.0533797	0.0515207	0.0423962	2.75168	2.5742	2.49995	0.0421409	0.0463911	0.0457118	0.00480604	0.0781942
NM_026856	Zfp644	3879	949	1246	1561	43	2	41	42	4	38	92	2	90	1225.23	0.177902	0.163174	0.181544	2.62749	2.67085	2.34134	0.0408588	0.0405942	0.0538463	0.0048037	0.0781942
NM_011858	Tenm4	8391	2217	3156	3198	84	6	78	62	14	48	211	2	209	2823.42	0.108435	0.101573	0.098494	2.89267	2.37373	2.74459	0.0368685	0.0573391	0.0425674	0.00483308	0.0784948
NM_001033268	Fam120a	3339	818	1134	1179	44	3	41	31	8	23	96	2	94	1031.67	0.198023	0.180758	0.207556	2.76061	2.09944	2.56883	0.0328406	0.0697507	0.0395268	0.00485713	0.0787456
NM_001013741	Ddn	2133	6378	7450	10042	100	2	98	137	14	123	365	4	361	7818.36	0.0625099	0.0599373	0.0509768	2.42973	2.94895	2.55024	0.0523259	0.0375754	0.0467509	0.00491674	0.0794309
NM_001099624	Rapgef2	4485	3341	4464	4985	100	5	95	87	10	77	222	3	219	4204.21	0.0867525	0.0819858	0.07507	2.86562	2.74568	2.42864	0.0394077	0.0435707	0.0536601	0.00492605	0.0794412
NM_001291150	Ptprt	4338	1005	1212	1346	44	6	38	25	0	25	124	0	124	1182.11	0.18189	0.166667	0.186634	2.54831	2.11277	2.8338	0.0442637	0.0694495	0.0301395	0.00494832	0.0795204
NM_008449	Kif5c	2871	7964	9926	13023	157	16	141	139	18	121	369	15	354	10090.8	0.0551005	0.0531127	0.0439924	2.75259	2.73403	2.27658	0.0423165	0.0425855	0.0514086	0.00494789	0.0795204
NM_001277867	Mphosph9	3435	64	142	133	8	0	8	6	0	6	10	0	10	108.615	0.763985	0.680828	1.10335	2.28096	2.01101	1.62428	0.0278147	0.0543598	0.0616892	0.00497514	0.0796719
NM_001081302	Trio	9312	3263	4298	4670	95	10	85	80	12	68	266	6	260	4033.92	0.088755	0.0838035	0.0771583	2.73893	2.59982	2.71497	0.0435424	0.0485059	0.0443147	0.00498897	0.0797538
NM_007988	Fasn	7515	4016	5778	6098	115	3	112	69	5	64	321	9	312	5214.35	0.0771534	0.0732963	0.065302	2.93414	2.32106	2.73013	0.0377379	0.0574688	0.0435871	0.00502911	0.0801159
NM_008171	Grin2b	4449	5975	6793	8894	118	8	110	114	15	99	341	9	332	7129.28	0.0655051	0.062683	0.0538511	2.66622	2.70784	2.51854	0.0456189	0.0442594	0.0481465	0.0051439	0.0816605
NM_001252083	Zfp384	1665	50	83	72	8	3	5	3	0	3	9	0	9	67.4569	1.00185	0.871787	1.76218	2.06475	1.56107	1.94505	0.0417743	0.113264	0.020777	0.00519059	0.0819716
NM_011145	Ppard	1323	23	47	50	3	0	3	2	0	2	6	0	6	38.3125	1.52056	1.25024	3.59506	1.91774	1.57053	1.97477	0.0585694	0.122605	0.0137185	0.00519929	0.0819716
NM_001170669	Pde8b	2367	418	582	624	27	0	27	15	1	14	46	0	46	533.66	0.30301	0.27209	0.351276	2.68596	1.91599	2.18778	0.0266137	0.0785546	0.0476296	0.00524455	0.0821198
NM_001193305	Mical2	3309	4060	7705	6216	113	6	107	96	7	89	278	5	273	5886.03	0.0723455	0.0689276	0.0605237	2.77504	2.69963	2.42156	0.042619	0.0448692	0.0520677	0.00524422	0.0821198
NM_008881	Plxna1	5685	1910	2746	2616	75	2	73	50	4	46	159	3	156	2404.58	0.118909	0.110965	0.110284	2.92265	2.4341	2.47946	0.0347917	0.0547474	0.0522023	0.00523847	0.0821198
NM_001195633	Epg5	7719	774	981	1155	36	3	33	24	3	21	101	2	99	956.868	0.207658	0.189144	0.220295	2.51402	2.03039	2.71525	0.0435503	0.0738228	0.0314324	0.00530727	0.0827404
NM_008413	Jak2	3399	358	515	627	25	1	24	20	3	17	37	1	36	486.729	0.321277	0.288332	0.376942	2.59372	2.2481	1.93121	0.029497	0.0529338	0.0647822	0.00531128	0.0827404
NM_001099298	Scn2a1	6021	9079	10435	14808	168	12	156	134	17	117	334	11	323	11209.5	0.0523787	0.0505933	0.0414722	2.81608	2.60705	2.0436	0.0404187	0.0453766	0.0556916	0.00535319	0.0832517
NM_001204229	Clec16a	3105	528	842	858	41	3	38	19	4	15	57	0	57	726.903	0.247803	0.223873	0.275114	2.92476	1.77721	2.19384	0.0215747	0.0911286	0.0540613	0.00552749	0.0854523
NM_011086	Pikfyve	6159	1103	1456	1823	47	1	46	39	3	36	107	2	105	1428.85	0.161904	0.149119	0.161455	2.67074	2.47954	2.41354	0.0404756	0.0507233	0.0518234	0.00553201	0.0854523
NM_001045536	Zzef1	8676	844	1014	1337	36	3	33	32	3	29	93	2	91	1045.82	0.196335	0.179287	0.205344	2.44521	2.41114	2.50944	0.048214	0.0518684	0.042702	0.00554841	0.0855614
NM_022022	Ube4b	3522	595	1034	963	29	1	28	25	4	21	86	0	86	845.589	0.224696	0.203924	0.243252	2.38025	2.12316	2.63329	0.0492843	0.0671288	0.032746	0.00561305	0.0861231
NM_025877	Slc25a23	1404	288	634	379	18	1	17	14	3	11	51	1	50	429.449	0.347523	0.311659	0.41422	2.21672	1.75709	2.51464	0.0497046	0.0907049	0.0240274	0.00561261	0.0861231
NM_133648	Slc12a6	3300	738	870	1075	41	3	38	25	2	23	66	1	65	884.37	0.218334	0.198413	0.234617	2.77296	2.21504	2.1916	0.0302761	0.0616844	0.057898	0.00560436	0.0861231
NM_001033348	Ralgapa2	5733	139	202	215	9	0	9	8	1	7	21	0	21	182.162	0.576588	0.514917	0.755305	2.03265	1.81565	2.12677	0.0517607	0.0780791	0.0276079	0.0057476	0.0878931
NM_133821	Phlpp1	5064	1078	1784	1631	37	3	34	46	9	37	142	3	139	1473.29	0.158922	0.146491	0.157769	2.22173	2.49503	2.78544	0.0631474	0.0501744	0.0353135	0.00576049	0.0879435
NM_020506	Xpo4	3456	82	110	132	9	0	9	2	0	2	14	1	13	105.864	0.774402	0.690041	1.12811	2.45282	0.807864	1.99688	0.0181787	0.244149	0.0257886	0.00586663	0.0894149
NM_001033347	D430041D05Rik	4245	1006	1318	1392	52	2	50	32	1	31	76	4	72	1228.83	0.17758	0.162892	0.181134	2.90533	2.38325	2.02055	0.0291049	0.0545702	0.0725916	0.00590105	0.08979
NM_001081279	Mfhas1	3147	239	365	407	12	1	11	14	2	12	38	0	38	328.727	0.409268	0.366503	0.503595	1.83867	2.07312	2.38477	0.0771064	0.0605059	0.0247883	0.00591556	0.0898616
NM_001003908	Cltc	5028	12530	14031	20610	175	16	159	131	19	112	412	14	398	15396.4	0.045146	0.0438635	0.0348947	2.59768	2.30644	2.03864	0.0443573	0.050777	0.0519394	0.00597044	0.0900976
NM_001081288	Taf2	3597	290	516	615	20	1	19	14	0	14	45	2	43	454.304	0.335525	0.300997	0.397122	2.32517	2.0368	2.24752	0.0433902	0.0673661	0.0399141	0.00595754	0.0900976
NM_001081179	Heatr5b	6213	882	1015	1201	36	0	36	26	6	20	107	7	100	1026.93	0.198597	0.181259	0.208311	2.58131	1.91025	2.66163	0.0410324	0.0819035	0.0350869	0.0060086	0.0904273
NM_009322	Tbr1	2046	133	252	174	12	1	11	4	1	3	27	2	25	184.899	0.571785	0.510661	0.747915	2.28414	0.804457	2.35343	0.0328401	0.223473	0.0160789	0.00601204	0.0904273
NM_001110275	Itsn1	3642	681	861	1082	32	3	29	30	3	27	70	3	67	858.502	0.222522	0.202042	0.240293	2.41743	2.45971	2.26323	0.0473722	0.0473439	0.0529242	0.00604054	0.0905586
NM_001135559	Sos2	3999	236	368	472	13	0	13	11	2	9	46	3	43	345.477	0.397174	0.355764	0.485917	2.02259	1.65731	2.51098	0.0612496	0.0992606	0.0198992	0.00613359	0.0912225
NM_001159516	Qk	960	140	294	368	8	3	5	9	1	8	42	1	41	252.492	0.478466	0.427917	0.606174	1.04294	1.74059	2.74554	0.176494	0.0886073	0.00771524	0.00612038	0.0912225
NM_018744	Sema6a	3096	65	180	135	7	0	7	6	2	4	16	0	16	121.832	0.718703	0.640767	1.00315	2.02214	1.43942	2.14183	0.0487244	0.12635	0.0196809	0.00614095	0.0912225
NM_031881	Nedd4l	2568	937	1359	1522	42	4	38	40	5	35	93	4	89	1246.2	0.176049	0.161549	0.179189	2.50744	2.54264	2.30907	0.0468313	0.0466899	0.0558049	0.00617584	0.0915383
NM_001081306	Ptprz1	6939	220	526	488	15	3	12	14	4	10	55	2	53	393.679	0.366738	0.328731	0.441792	1.81456	1.69681	2.68078	0.0814365	0.0959387	0.0156745	0.00619384	0.0915408
NM_008448	Kif5b	2892	1958	2763	3580	65	7	58	75	12	63	158	8	150	2684.38	0.111609	0.104424	0.102038	2.51062	2.79692	2.31733	0.0513367	0.0407198	0.0590933	0.00623706	0.0918512
NM_008832	Phka1	3726	55	103	137	6	0	6	7	2	5	12	2	10	93.1713	0.828247	0.737404	1.26636	2.03713	1.9037	1.77184	0.045724	0.0648834	0.0416001	0.00623246	0.0918512
NM_001081242	Tln2	7629	2502	3103	3698	68	9	59	67	9	58	212	5	207	3061.79	0.103556	0.0971833	0.093099	2.43303	2.58085	2.6528	0.0547476	0.0491123	0.0461258	0.00625699	0.0919968
NM_001163564	Naf1	1794	37	66	47	4	0	4	2	1	1	8	0	8	49.7443	1.2375	1.04547	2.53188	2.03752	0.789628	2.08611	0.043802	0.289116	0.00984466	0.00628323	0.0922346
NM_001302384	2008-03-01	861	55	95	90	1	0	1	6	0	6	13	1	12	78.2352	0.914147	0.806343	1.50392	0.365033	2.2572	2.18095	0.364303	0.03203	0.010938	0.0064025	0.0933868
NM_001081068	Ltn1	5304	776	1085	1280	31	7	24	38	4	34	87	0	87	1024.14	0.198937	0.181555	0.208757	2.01782	2.64925	2.46546	0.0737077	0.039786	0.0446082	0.00653015	0.0950973
NM_010956	Ogdh	3072	2377	3699	3835	66	7	59	70	10	60	214	5	209	3235.64	0.100376	0.0943174	0.0896179	2.39027	2.5875	2.61347	0.0565019	0.048916	0.0476277	0.00656293	0.0954229
NM_001114125	Dab2ip	3399	686	821	859	20	0	20	27	5	22	84	0	84	789.152	0.234923	0.212766	0.25729	1.96807	2.23912	2.6662	0.0754738	0.0592187	0.0298536	0.00663444	0.0961574
NM_018797	Plxnc1	4725	461	742	773	31	3	28	20	3	17	50	0	50	643.148	0.268523	0.2417	0.303517	2.59211	2.03899	2.12607	0.0339156	0.0707534	0.0560733	0.00667923	0.0966536
NM_133907	Ube3c	3252	1081	1717	2065	37	2	35	36	3	33	149	2	147	1567.08	0.153102	0.141355	0.150635	2.21459	2.28826	2.80623	0.0637934	0.0606681	0.0352747	0.00675716	0.0976272
NM_133917	Mlxip	2754	39	96	49	3	0	3	5	0	5	8	1	7	60.8162	1.07276	0.924376	1.98234	1.56002	2.2238	1.72283	0.107899	0.0337244	0.0377692	0.00679336	0.0979955
NM_001037136	Agap1	2415	335	480	447	16	1	15	15	2	13	44	1	43	418.111	0.353347	0.316835	0.422553	2.06751	1.99956	2.32739	0.0603574	0.0693865	0.0331386	0.00684661	0.0982105
NM_001114609	Ino80d	3066	63	134	85	6	0	6	1	0	1	15	0	15	92.9807	0.829158	0.738183	1.26879	2.03871	0.320275	2.31438	0.0455683	0.357672	0.00852222	0.00685115	0.0982105
NM_001114613	Stxbp5l	3387	1656	2294	2866	62	3	59	53	5	48	125	4	121	2213.98	0.12475	0.116185	0.11698	2.68402	2.55619	2.19503	0.043348	0.0493772	0.0646832	0.00683334	0.0982105
NM_001193266	Mdga2	2871	178	308	345	16	1	15	9	1	8	24	0	24	267.498	0.462587	0.413828	0.582429	2.41328	1.69727	1.94154	0.0299607	0.0936321	0.0496178	0.0068627	0.0982224
NM_001177720	Madd	4884	2304	3743	3747	61	3	58	55	9	46	245	1	244	3194.93	0.101095	0.0949658	0.0904026	2.37583	2.22086	2.84805	0.0571048	0.0634363	0.0395232	0.00701917	0.100305
NM_001042488	Dlgap4	858	211	548	360	6	0	6	20	1	19	39	0	39	363.208	0.385282	0.345204	0.468614	0.983843	2.61976	2.32533	0.178546	0.027232	0.0300862	0.00714072	0.101725
NM_001085355	Arid1b	6735	1662	5131	2520	70	7	63	60	5	55	179	7	172	3040.64	0.103963	0.0975502	0.0935469	2.5315	2.51076	2.39366	0.0507433	0.0518061	0.0558526	0.00716184	0.101867
NM_025451	Camk2n1	237	254	248	336	13	1	12	10	1	9	32	3	29	278.854	0.451412	0.403912	0.56579	2.08153	1.81807	2.16457	0.0533088	0.0814702	0.0339207	0.00718108	0.101982
NM_010687	Large	2271	1439	2188	2441	51	2	49	49	6	43	128	4	124	1973.63	0.133442	0.123929	0.127097	2.50995	2.48714	2.34064	0.0501777	0.0519596	0.0576571	0.00729774	0.103393
NM_028966	Samd4	1872	53	67	95	2	0	2	3	0	3	13	1	12	69.6485	0.981645	0.856748	1.70129	1.04	1.53708	2.2928	0.208852	0.116764	0.00616977	0.00730295	0.103393
NM_001037764	Rai1	5670	485	885	681	28	4	24	21	6	15	67	1	66	675.527	0.259993	0.234355	0.291852	2.33996	1.83221	2.47247	0.0485936	0.0866347	0.0359646	0.00733965	0.103752
NM_001139509	Nr4a2	1797	337	746	626	36	3	33	11	1	10	37	0	37	551.83	0.296575	0.266367	0.342294	2.94015	1.44341	1.8489	0.0172841	0.12071	0.0744025	0.00748712	0.105118
NM_001172152	Wdr17	3873	335	521	631	19	0	19	16	0	16	39	1	38	479.706	0.32424	0.290966	0.381127	2.28305	2.17654	2.02114	0.0469571	0.0576573	0.0572154	0.00747465	0.105118
NM_001291214	Myo18a	5103	1092	1335	1452	37	3	34	40	4	36	89	2	87	1287.51	0.17255	0.158479	0.174762	2.32607	2.5577	2.24527	0.0566008	0.0462376	0.0596851	0.00752442	0.105388
NM_001097644	Ccnyl1	876	7	22	18	0	0	0	0	0	0	6	1	5	14.8739	3.90613	2.87036	15.1181	0.650236	0.695543	2.66271	0.445809	0.428376	0.000821609	0.00755148	0.105605
NM_001205239	Parp6	1893	339	614	650	22	3	19	18	1	17	42	0	42	516.437	0.309422	0.277792	0.360258	2.22593	2.20364	2.09102	0.0519066	0.0567297	0.0536648	0.00759433	0.106043
NM_023598	Arid5b	3567	234	375	348	12	1	11	12	1	11	34	1	33	314.266	0.420467	0.376446	0.520034	1.8735	1.9914	2.23012	0.0732419	0.0667329	0.0324488	0.00761634	0.106188
NM_001037709	Rusc2	4572	1460	2093	2051	42	4	38	44	5	39	147	1	146	1849.6	0.13866	0.128567	0.133258	2.20174	2.39834	2.63697	0.0649314	0.0557922	0.0440146	0.00764892	0.10648
NM_008420	Kcnb1	2574	739	835	876	26	3	23	29	5	24	73	3	70	821.201	0.228964	0.207617	0.249088	2.12989	2.32954	2.36825	0.0645016	0.0541672	0.0458655	0.00767942	0.106743
NM_025481	Smurf2	2247	134	177	198	9	1	8	6	0	6	20	1	19	167.454	0.604305	0.539477	0.798122	1.94583	1.68617	2.07027	0.0588155	0.0923385	0.0297305	0.00772581	0.107063
NM_001165989	Ckap5	6099	3007	3509	5082	90	4	86	58	11	47	188	5	183	3776.35	0.0920614	0.0868012	0.0806489	2.80669	2.12577	2.27411	0.0410761	0.0665061	0.0596256	0.00777994	0.107557
NM_011104	Prkce	2214	3391	5401	5488	79	5	74	78	14	64	235	8	227	4660.41	0.0819855	0.0776713	0.0701765	2.42973	2.40534	2.38106	0.0543819	0.0550234	0.0547408	0.00781468	0.107805
NM_008774	Pabpc1	1911	324	684	578	13	2	11	21	1	20	53	1	52	513.558	0.310526	0.278773	0.361807	1.49329	2.43023	2.39805	0.11483	0.0423379	0.0338436	0.00784266	0.108028
NM_020260	Arhgap31	4278	57	133	103	4	0	4	2	2	0	19	0	19	94.7791	0.820724	0.730913	1.24628	1.53845	-0.6941	2.61787	0.107372	0.573967	0.00267515	0.00785512	0.108037
NM_001099637	Cep170	4737	1102	1487	1735	39	1	38	37	3	34	101	5	96	1415.28	0.162847	0.149949	0.162623	2.40894	2.40653	2.29472	0.0529288	0.0542477	0.0578738	0.00790462	0.108393
NM_001098172	Pcdh10	3144	862	1143	1154	38	2	36	28	3	25	73	2	71	1047.15	0.196179	0.179151	0.205139	2.56621	2.20374	2.15458	0.0420106	0.0635234	0.0627076	0.00794905	0.108677
NM_028451	Larp1	3219	534	1010	858	27	2	25	22	2	20	68	1	67	783.699	0.235979	0.213678	0.25875	2.28156	2.11308	2.35094	0.0542029	0.067235	0.0459148	0.00794843	0.108677
NM_001163262	Cmip	2322	1656	3369	2353	47	2	45	59	2	57	136	2	134	2425.83	0.118306	0.110425	0.109597	2.22994	2.73089	2.25318	0.0637081	0.0427425	0.0619605	0.00800103	0.108903
NM_028385	Setd5	4326	575	891	1067	34	1	33	23	4	19	58	1	57	818.105	0.229522	0.208099	0.249853	2.63532	2.01045	2.08012	0.0354049	0.0744346	0.0639343	0.00799226	0.108903
NM_001014973	Snx13	2877	669	825	1166	23	4	19	40	3	37	57	2	55	863.752	0.221654	0.20129	0.239114	1.82775	2.8957	1.97726	0.0864434	0.027277	0.07197	0.00803789	0.109077
NM_027526	Rasgef1a	1470	1114	1587	1782	43	3	40	41	4	37	89	1	88	1465.11	0.159459	0.146964	0.158431	2.4543	2.49921	2.13724	0.0508994	0.0499413	0.0667283	0.00803499	0.109077
NM_011067	Per3	3342	118	221	202	11	1	10	7	1	6	17	0	17	175.734	0.58829	0.525287	0.773347	2.19797	1.64996	1.87183	0.03812	0.0969192	0.0462437	0.00808122	0.109503
NM_028014	Tmem94	4083	277	441	429	16	1	15	11	3	8	42	0	42	375.56	0.377496	0.338288	0.457328	2.1506	1.44266	2.39749	0.0523961	0.12234	0.0269281	0.0081475	0.110229
NM_033218	Srebf2	3393	1280	1617	1685	40	4	36	36	3	33	117	1	116	1521.53	0.155852	0.143783	0.153997	2.27695	2.31039	2.49552	0.0603018	0.0594393	0.0484741	0.00818997	0.110486
NM_001291119	Neurl4	4620	1108	1355	1487	35	2	33	39	2	37	86	3	83	1310.12	0.170715	0.156868	0.172451	2.27077	2.58311	2.16141	0.0597735	0.0451862	0.0646059	0.00821811	0.110703
NM_001014974	Ttll4	3582	36	62	81	2	0	2	3	0	3	9	0	9	56.9573	1.12227	0.96092	2.14194	1.19573	1.68802	2.10783	0.181432	0.0952122	0.0101391	0.00824248	0.110752
NM_053170	Trim33	3423	653	876	1029	33	3	30	25	1	24	54	1	53	837.221	0.226136	0.20517	0.245217	2.48417	2.31504	1.9548	0.0433885	0.0552074	0.0731578	0.00824591	0.110752
NM_021493	Arhgap23	3834	288	403	364	10	1	9	11	2	9	48	1	47	351.003	0.393373	0.352389	0.480377	1.52488	1.64541	2.62125	0.110659	0.10056	0.0158466	0.00828696	0.110977
NM_028194	Fryl	9024	453	630	829	18	3	15	23	6	17	70	3	67	618.265	0.275539	0.247794	0.313155	1.76468	2.0686	2.57907	0.0899001	0.0682667	0.0287198	0.008284	0.110977
NM_001039184	Cep350	9288	799	1407	1496	42	5	37	27	3	24	94	4	90	1194.79	0.180692	0.165618	0.185101	2.50258	2.04818	2.36554	0.0466534	0.073342	0.052222	0.00837452	0.111986
NM_001081557	Camta1	5049	1788	2345	2313	61	2	59	37	5	32	133	1	132	2142.5	0.127164	0.118338	0.119771	2.70943	2.0105	2.35115	0.0421114	0.0746599	0.0574399	0.00844545	0.11277
NM_080708	Bmp2k	3417	59	122	91	5	0	5	1	1	0	16	0	16	88.947	0.849408	0.755235	1.32345	1.85065	-0.646445	2.44451	0.0649986	0.571632	0.00489786	0.00849698	0.113293
NM_001081344	Stxbp5	3351	994	1623	1646	50	2	48	22	4	18	108	0	108	1388.75	0.164736	0.151612	0.164971	2.7529	1.53937	2.4812	0.0366218	0.105122	0.0481563	0.00862311	0.114412
NM_025949	Rps6ka6	2583	48	52	75	3	0	3	1	0	1	10	0	10	57.3769	1.11653	0.956694	2.1232	1.60508	0.682516	2.23827	0.101019	0.306041	0.00600003	0.00862703	0.114412
NM_009124	Atxn1	2376	397	436	573	16	1	15	15	1	14	45	1	44	464.025	0.331097	0.297061	0.390835	1.98685	2.02091	2.25957	0.0682665	0.0688474	0.0396526	0.0086591	0.114455
NM_080633	Aco2	2343	6444	8478	10614	98	7	91	91	10	81	267	4	263	8329.01	0.0605579	0.0581439	0.0491193	2.27496	2.30483	2.03391	0.0566132	0.0552136	0.059592	0.00865571	0.114455
NM_030180	Usp54	4767	131	249	288	7	0	7	8	0	8	29	4	25	213.03	0.527732	0.47161	0.680554	1.58954	1.86811	2.21717	0.100538	0.0739653	0.0251502	0.00868342	0.114611
NM_001098528	Kcnb2	2724	342	448	528	17	2	15	17	0	17	33	1	32	432.13	0.346179	0.310465	0.4123	2.04198	2.33738	1.88062	0.062848	0.0454431	0.0663947	0.008779	0.11554
NM_008817	Peg3	4716	3200	3850	4707	90	8	82	62	8	54	152	5	147	3871.73	0.0907949	0.0856536	0.0793056	2.71948	2.30345	1.936	0.044143	0.0594242	0.0721621	0.00876685	0.11554
NM_019426	Atf7ip	3921	382	585	577	24	1	23	13	1	12	41	2	39	506.605	0.313229	0.281177	0.365605	2.50384	1.74858	2.00517	0.0347145	0.0923725	0.0597216	0.00884809	0.115884
NM_007470	Apod	570	21	65	47	2	0	2	5	0	5	4	0	4	42.4589	1.3983	1.16227	3.11788	1.42315	2.49342	1.39047	0.141622	0.016049	0.0845462	0.00887215	0.115933
NM_001198787	Aatk	3954	2058	2933	2973	56	1	55	46	3	43	152	3	149	2623.15	0.113096	0.105758	0.103705	2.4532	2.27366	2.32995	0.0537136	0.0616996	0.0585807	0.00894451	0.116215
NM_018872	Tmem131	5634	553	1012	1045	37	7	30	26	5	21	57	0	57	841.773	0.225349	0.20449	0.244144	2.47997	2.12655	2.05268	0.0436866	0.0668779	0.0662902	0.00892752	0.116215
NM_028493	Rhobtb3	1836	46	88	90	5	0	5	0	2	0	12	0	12	72.0608	0.960931	0.841309	1.63973	2.01364	-0.48847	2.26004	0.0468703	0.561971	0.00736315	0.00893723	0.116215
NM_001001144	Scap	3831	911	1148	1407	26	1	25	32	2	30	92	1	91	1136.6	0.18638	0.170596	0.192406	1.99374	2.39599	2.42935	0.0757589	0.0533449	0.0481393	0.00895929	0.116242
NM_001033222	Pdzd8	3444	755	1065	1240	36	2	34	30	10	20	76	2	74	998.037	0.2022	0.184397	0.213057	2.52323	1.93166	2.25969	0.043594	0.0804449	0.0556611	0.00898305	0.11634
NM_001290636	Dock7	6387	264	391	542	21	3	18	11	1	10	32	1	31	383.483	0.372699	0.334027	0.450392	2.38236	1.7165	1.95114	0.0371805	0.0938776	0.0575303	0.00918686	0.118596
NM_010183	Fbrs	1401	29	55	31	3	1	2	1	0	1	7	0	7	38.5088	1.51411	1.24561	3.56919	1.49875	0.98173	2.16249	0.128862	0.257233	0.00606258	0.00919246	0.118596
NM_001081354	Mamld1	2412	127	199	160	14	0	14	2	1	1	18	2	16	161.513	0.616516	0.550294	0.817116	2.71075	-0.0940772	1.87056	0.011423	0.399087	0.0446476	0.00928573	0.11963
NM_001168321	Bcor	5124	195	279	312	16	1	15	9	4	5	24	0	24	256.867	0.473696	0.423685	0.59903	2.44467	1.14273	1.98055	0.0276698	0.16285	0.0454328	0.00932847	0.119844
NM_080437	Celsr3	9906	403	566	619	19	2	17	18	0	18	40	1	39	520.658	0.307821	0.276368	0.358013	2.06762	2.27554	1.97885	0.0634271	0.0520389	0.062417	0.00937523	0.120276
NM_008882	Plxna2	5685	1134	1763	1759	43	2	41	29	4	25	115	2	113	1524.53	0.155666	0.143619	0.153769	2.45829	1.92189	2.45615	0.0509989	0.0806994	0.0503802	0.00942293	0.120719
NM_001081149	Kat6a	6012	635	1014	1174	29	3	26	23	4	19	81	2	79	912.016	0.214088	0.19473	0.228896	2.21862	1.92891	2.43952	0.0598365	0.0804568	0.0439323	0.0095721	0.122459
NM_001037877	Tcf25	1881	4786	6696	7979	82	6	76	82	11	71	223	5	218	6340.02	0.0695882	0.0664147	0.0578161	2.22942	2.32195	2.02683	0.0599212	0.056387	0.0631355	0.00963718	0.123119
NM_001302637	Cacna1d	6540	236	437	465	10	2	8	16	0	16	37	2	35	365.891	0.383558	0.343672	0.466112	1.34072	2.37977	2.16624	0.132338	0.0403721	0.040102	0.00967054	0.123373
NM_001081426	Dip2c	4671	2186	2583	2980	54	6	48	42	2	40	164	4	160	2567.81	0.114489	0.107007	0.105275	2.27706	2.18778	2.45256	0.0614995	0.065571	0.0534671	0.00971887	0.123646
NM_028627	Psd	3075	2155	3314	3558	49	1	48	64	4	60	134	3	131	2942.03	0.105925	0.0993165	0.095711	2.17173	2.65888	2.03514	0.0660662	0.0461007	0.0707555	0.00971491	0.123646
NM_028096	2010300C02Rik	3528	4498	5802	6390	88	5	83	62	11	51	226	1	225	5508.62	0.0749253	0.0712738	0.0630787	2.46378	1.95794	2.20747	0.0527071	0.0698329	0.0590729	0.0097836	0.124297
NM_001190846	Kat2b	2208	49	63	66	4	2	2	3	0	3	9	0	9	58.9939	1.09526	0.941003	2.05429	1.16853	1.66166	2.07403	0.186243	0.0988853	0.011912	0.00985287	0.12483
NM_001177396	Anks1b	1533	863	1131	1433	39	2	37	29	3	26	61	0	61	1117.06	0.188404	0.172365	0.19502	2.55466	2.20969	1.87667	0.0433307	0.0635367	0.0814216	0.0100221	0.12645
NM_008851	Pitpnm1	3732	1177	1549	1673	33	1	32	34	8	26	121	2	119	1451.62	0.160357	0.147756	0.15954	2.14831	2.01311	2.5773	0.0672064	0.0755136	0.0441263	0.0100144	0.12645
NM_001033634	Zyg11b	2235	2081	2498	3487	59	4	55	49	12	37	150	1	149	2627.98	0.112976	0.105651	0.103571	2.45177	2.06078	2.32817	0.0537784	0.0713021	0.0586545	0.0100486	0.12661
NM_021521	Med12	6573	116	199	219	8	1	7	11	1	10	14	1	13	172.237	0.594918	0.53116	0.783589	1.7541	2.31712	1.5286	0.0793709	0.0342093	0.0836845	0.01013	0.12746
NM_001290770	Tro	6264	3545	3888	6090	82	2	80	58	13	45	188	8	180	4397.71	0.0846321	0.0800641	0.0728799	2.58567	1.95007	2.10384	0.0489236	0.0722956	0.0646135	0.0101762	0.127751
NM_001033253	Plekhg1	4173	262	548	455	15	0	15	15	4	11	37	0	37	410.377	0.357457	0.320486	0.428446	2.08196	1.79117	2.13385	0.0589551	0.087257	0.0450988	0.0102977	0.128863
NM_001081270	Dscaml1	6336	782	1319	1168	33	1	32	29	2	27	63	1	62	1072.78	0.193227	0.176576	0.201283	2.38243	2.29251	1.93866	0.0518884	0.058565	0.0769541	0.0103626	0.129144
NM_001290788	Aqr	4203	376	535	611	25	3	22	15	1	14	31	0	31	496.806	0.317136	0.284651	0.371103	2.45756	1.96969	1.70204	0.036936	0.07361	0.0857361	0.0103364	0.129144
NM_133791	Wwc2	3564	395	575	596	22	0	22	13	2	11	40	0	40	514.032	0.310343	0.278611	0.361551	2.43117	1.62218	2.0268	0.0389715	0.103894	0.058376	0.0104501	0.130058
NM_026908	Cab39l	1014	48	90	91	3	1	2	2	0	2	13	0	13	73.8391	0.946592	0.830609	1.59763	0.994766	1.0782	2.3435	0.216714	0.20197	0.00546841	0.0105542	0.130842
NM_010804	Mllt10	3207	137	177	198	8	0	8	9	0	9	12	0	12	168.759	0.601705	0.537173	0.794093	1.93981	2.19492	1.44131	0.0594788	0.0425434	0.0952214	0.0106098	0.131155
NM_133195	Celf4	1455	580	860	918	22	0	22	24	2	22	57	3	54	771.112	0.238467	0.215826	0.262199	2.11721	2.25647	2.06042	0.0647043	0.0579238	0.0642744	0.0106079	0.131155
NM_001164483	Synj1	4824	5057	7960	9048	82	6	76	84	13	71	215	5	210	7146.66	0.0654237	0.0626085	0.0537726	2.13671	2.23208	1.85792	0.0621122	0.058463	0.0665273	0.0106316	0.131247
NM_024191	Arl2bp	492	91	103	145	6	1	5	6	0	6	11	0	11	110.941	0.755463	0.67329	1.08358	1.6796	1.99511	1.72942	0.0866188	0.0560267	0.0501011	0.0106856	0.131737
NM_001042528	Cacna1b	6984	1457	2145	2321	46	3	43	39	2	37	104	2	102	1936.05	0.134963	0.125282	0.128887	2.34041	2.29007	2.07985	0.0580654	0.0610194	0.0704295	0.0109066	0.133206
NM_001014981	Wdr7	4470	3691	4551	5701	76	11	65	56	4	52	187	2	185	4572.81	0.0828402	0.0784435	0.0710461	2.25999	2.12513	2.10558	0.0607044	0.0652767	0.0641779	0.0110704	0.134506
NM_001081321	Pds5a	3999	501	736	946	29	1	28	17	8	9	63	1	62	704.1	0.25302	0.228362	0.282295	2.52201	1.12305	2.34381	0.0388958	0.148432	0.0440559	0.0110718	0.134506
NM_001163175	Begain	1860	287	447	390	17	1	16	8	2	6	38	0	38	371.594	0.379954	0.340471	0.460887	2.24628	1.08806	2.26684	0.0454014	0.16423	0.0340138	0.0110466	0.134506
NM_021895	Actn4	2739	201	299	255	12	0	12	6	1	5	26	0	26	250.944	0.480183	0.429439	0.608748	2.16317	1.16024	2.11403	0.0454136	0.160726	0.0349531	0.0110983	0.13465
NM_001081355	Prdm2	5130	530	875	831	27	4	23	24	2	22	45	1	44	731.319	0.246826	0.223031	0.273766	2.21963	2.29623	1.82189	0.0572547	0.0549386	0.0814578	0.0111359	0.134927
NM_001029873	Unc13a	5139	4133	4736	5891	68	3	65	64	9	55	190	4	186	4874.78	0.0800049	0.0758799	0.0681699	2.21049	2.15658	2.05179	0.0622239	0.0636763	0.0653678	0.0112306	0.135055
NM_001163513	Dlg5	5766	239	394	323	11	1	10	10	1	9	34	1	33	315.997	0.419086	0.37522	0.518004	1.74372	1.72424	2.22483	0.0861473	0.0918901	0.0328977	0.0112791	0.135055
NM_001290528	Map3k10	2823	446	592	593	13	0	13	23	5	18	47	1	46	540.921	0.300399	0.269768	0.347629	1.6755	2.24689	2.17478	0.0971374	0.0544253	0.0488258	0.0112009	0.135055
NM_001290628	Vps54	2898	140	150	244	12	1	11	6	1	5	14	0	14	173.45	0.592597	0.529104	0.780001	2.33363	1.43738	1.62138	0.028995	0.124755	0.0721941	0.0113038	0.135055
NM_007459	Ap2a2	2817	2930	4397	4911	65	4	61	56	5	51	166	5	161	3984.29	0.0893648	0.0843567	0.0777981	2.27645	2.20103	2.03883	0.0606463	0.0632357	0.067941	0.0112836	0.135055
NM_009782	Cacna1e	6822	6324	7338	9784	103	9	94	70	15	55	219	8	211	7690.91	0.0630303	0.0604148	0.0514741	2.38295	1.81444	1.79412	0.0538298	0.0710206	0.0672464	0.0111653	0.135055
NM_001093776	Myt1l	3558	1779	2884	2311	56	5	51	37	2	35	122	5	117	2311.89	0.121649	0.113415	0.113414	2.44407	2.07893	2.1053	0.0537973	0.0709864	0.0688386	0.0113629	0.135175
NM_133897	Lrrc8c	2412	107	156	194	6	0	6	5	1	4	19	0	19	147.879	0.647151	0.577428	0.867483	1.67949	1.29403	2.18987	0.0873946	0.147113	0.0204251	0.0113534	0.135175
NM_001253892	Slc4a2	3714	60	131	109	5	1	4	2	3	0	19	1	18	97.0169	0.810698	0.722134	1.21972	1.52039	-0.711611	2.52142	0.110024	0.574753	0.00417674	0.011405	0.135499
NM_001099288	Arhgap44	2427	938	1154	1399	37	2	35	23	2	21	74	0	74	1148.18	0.185209	0.169571	0.190896	2.45538	1.89362	2.12485	0.0486696	0.0829867	0.0655825	0.0114307	0.135629
NM_001081335	Cul9	7593	1002	1312	1503	33	1	32	32	2	30	70	0	70	1254.33	0.175344	0.160931	0.178295	2.26139	2.32203	1.9607	0.0600059	0.0579302	0.0764669	0.0114622	0.135651
NM_029654	Atg2b	6228	916	1376	1576	33	2	31	23	6	17	117	5	112	1256.74	0.175137	0.16075	0.178033	2.21552	1.53632	2.62929	0.0626416	0.106401	0.0398202	0.0114485	0.135651
NM_001272064	Trim24	3054	208	242	333	14	0	14	7	2	5	23	0	23	256.112	0.474511	0.424408	0.600249	2.35384	1.14494	1.92449	0.0328103	0.162583	0.0500389	0.0115	0.13589
NM_027088	Bap1	2187	743	1002	1288	26	2	24	26	4	22	76	0	76	985.115	0.20387	0.18585	0.215266	2.0479	2.07269	2.31019	0.071479	0.0712259	0.0524995	0.011512	0.13589
NM_001081340	Setd2	7614	1372	2651	3001	57	6	51	35	4	31	124	3	121	2241.02	0.123871	0.1154	0.115967	2.46817	1.93237	2.18335	0.0526197	0.0783781	0.0652222	0.0115698	0.136396
NM_026952	Cdk12	3777	308	518	570	18	5	13	13	0	13	42	1	41	450.952	0.337085	0.302383	0.39934	1.81633	1.94282	2.18753	0.082692	0.0748386	0.0436614	0.0116107	0.136526
NM_011855	Tenm1	8196	942	1204	1807	47	3	44	26	6	20	73	3	70	1273.31	0.173731	0.159516	0.176253	2.69723	1.74889	1.94626	0.0381079	0.0920676	0.0774459	0.0116619	0.136921
NM_020608	Cramp1l	3858	236	328	353	12	1	11	9	2	7	32	0	32	301.292	0.431181	0.385957	0.535822	1.90614	1.43807	2.22761	0.0696492	0.123372	0.0316643	0.0116742	0.136921
NM_001164585	Dnajc6	2703	3011	4633	5232	60	8	52	64	11	53	189	4	185	4180.04	0.0870285	0.0822363	0.0753568	2.01304	2.21949	2.19199	0.070979	0.0622743	0.0619202	0.0117285	0.137207
NM_001205332	Map4	3261	1011	1253	1491	29	1	28	26	4	22	100	2	98	1236.06	0.176937	0.162329	0.180317	2.08634	1.9024	2.45443	0.0702411	0.0823441	0.0480246	0.0118653	0.138631
NM_021323	Usp29	2610	328	492	592	18	1	17	11	2	9	44	2	42	457.054	0.334259	0.299871	0.395322	2.16849	1.4473	2.20854	0.0540766	0.121211	0.0425808	0.01191	0.138807
NM_001114096	Smarcc2	3393	1369	1791	2118	49	3	46	35	3	32	81	3	78	1730.21	0.144275	0.133546	0.139957	2.52259	2.17088	1.80528	0.0488095	0.0668725	0.0857586	0.0119372	0.138813
NM_027144	Arhgef12	4635	2085	2773	3298	52	7	45	45	10	35	162	3	159	2668.73	0.111984	0.10476	0.102457	2.15607	1.97123	2.40648	0.0670477	0.075397	0.0553976	0.0119415	0.138813
NM_001110783	Ank1	5724	278	383	380	15	1	14	12	4	8	31	0	31	344.407	0.397921	0.356427	0.487006	2.12453	1.50764	2.05454	0.0530493	0.115261	0.0466602	0.0121171	0.14032
[truncated: 6,410 more rows]
